# Supplementary material for: RETRACTED ARTICLE: MALAT1 regulates the transcriptional and translational levels of proto-oncogene RUNX2 in colorectal cancer metastasis
Source: PubMed Central journal article supplement (PMC6522477; doi:10.1038/s41419-019-1598-x), 2019-05-16

# Figure S1

**a**

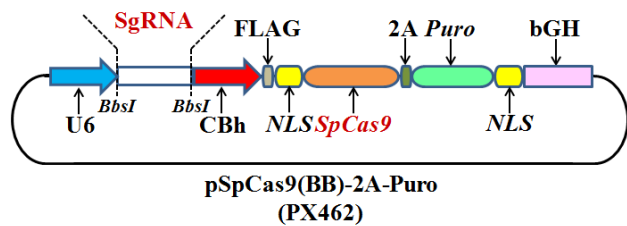

**b**

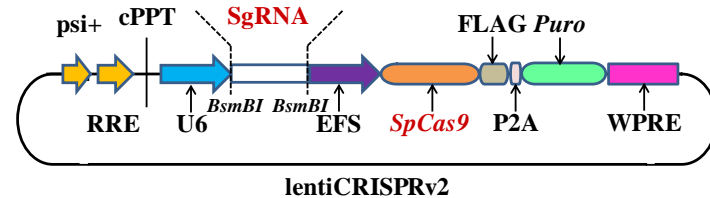

**c**

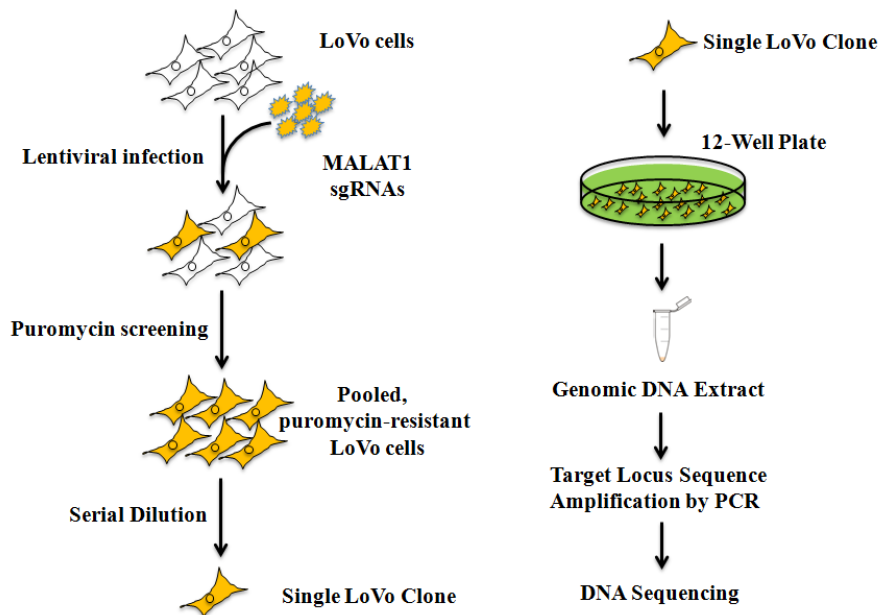

**d**

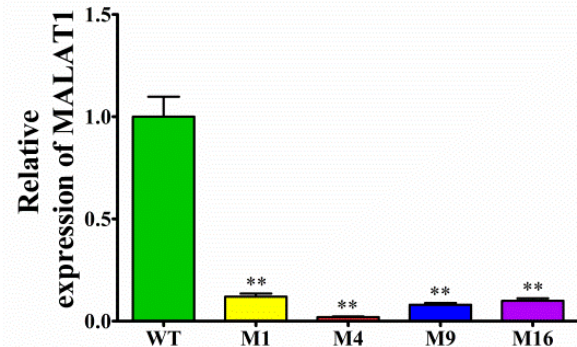

# Figure S2

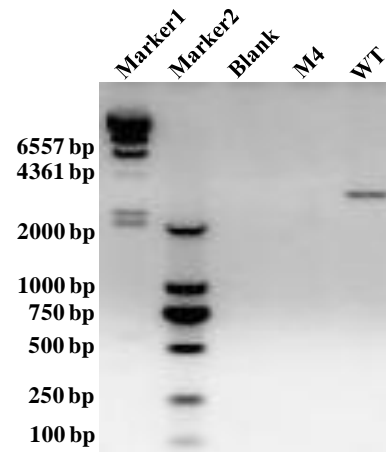

# Figure S3

**a**
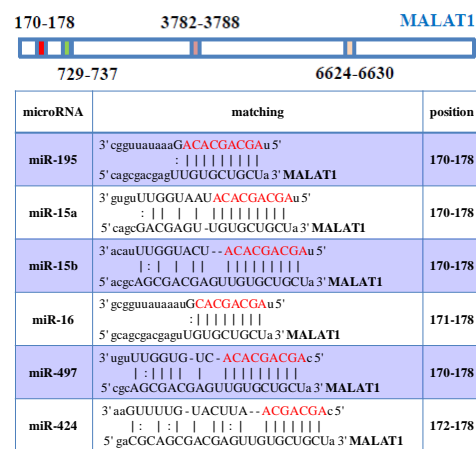
**b**

| microRNA | matching                                                                                                   | position |
|----------|------------------------------------------------------------------------------------------------------------|----------|
| miR-195  | 3' cgguuuaaaGACACGACGAu 5'<br>:                                <br>5' agcagacagCCGUGUCGUc 3' MALAT1        | 730-737  |
| miR-15a  | 3' guUUUGGUAUACACGACGAu 5'<br>:                                <br>5' agCAGA- CAGCCGUGUCGUc 3' MALAT1      | 730-737  |
| miR-15b  | 3' acuuUUGGUACUACACGACGAu 5'<br>:                                <br>5' aagCAGACGCCGUGUCGUc 3' MALAT1      | 730-737  |
| miR-16   | 3' gcgguuuaaaGACACGACGAu 5'<br>:                                <br>5' aagcagacagCCGUGUCGUc 3' MALAT1      | 729-737  |
| miR-497  | 3' ugUUUG- GUGUC- ACACGACGAe 5'<br>:                                <br>5' ccAAGCAGACGCCGUGUCGUc 3' MALAT1 | 730-737  |
| miR-424  | 3' aaguUUUGUACUUAACGACGAe 5'<br>:                                <br>5' aagCAGACGCCGUGUCGUc 3' MALAT1      | 731-737  |

**c**
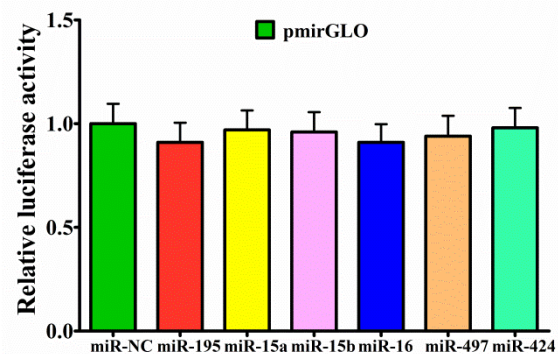
**d**
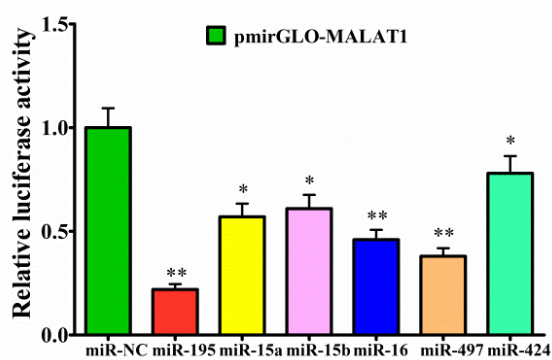
**e**
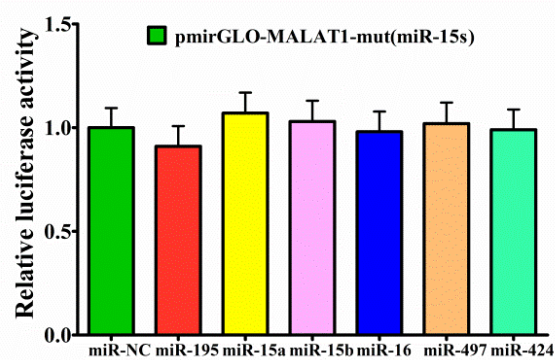
**f**
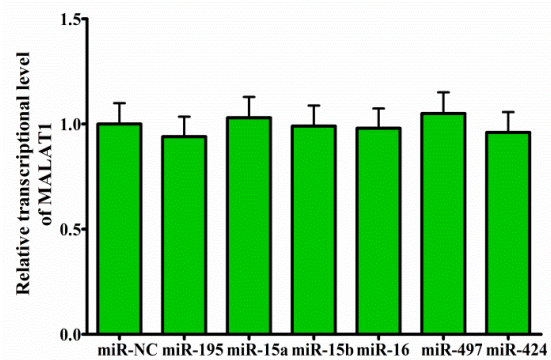
**g**
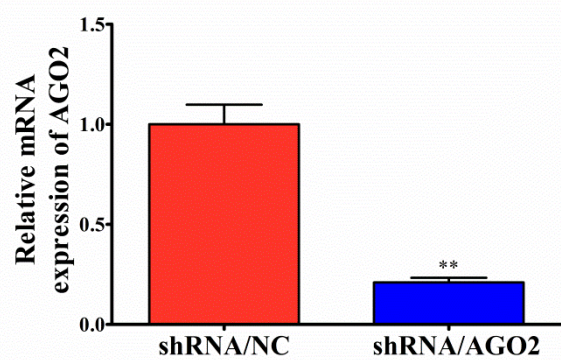
**h**
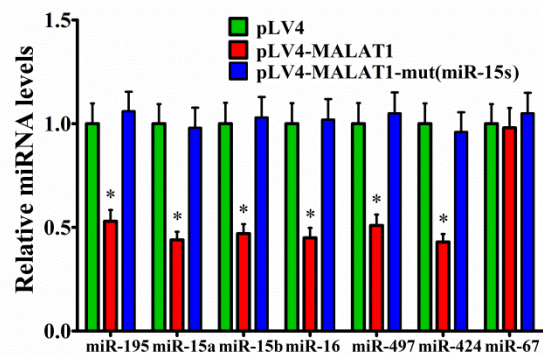
**i**
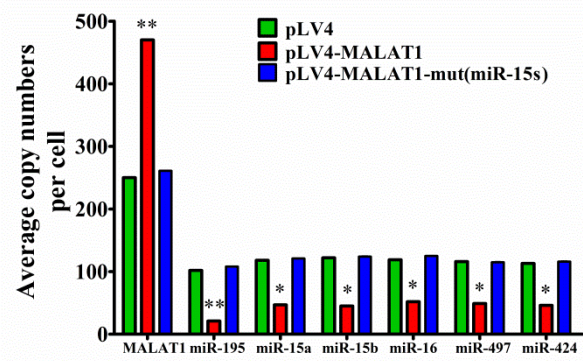

# Figure S4

**a**

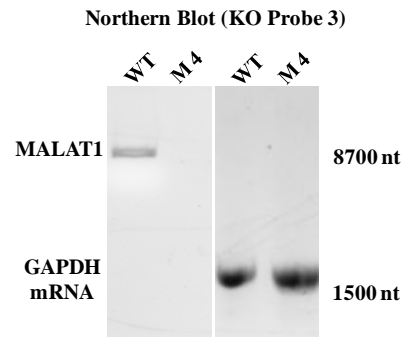

**b**

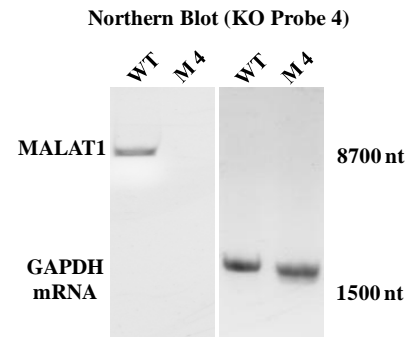

# Figure S5

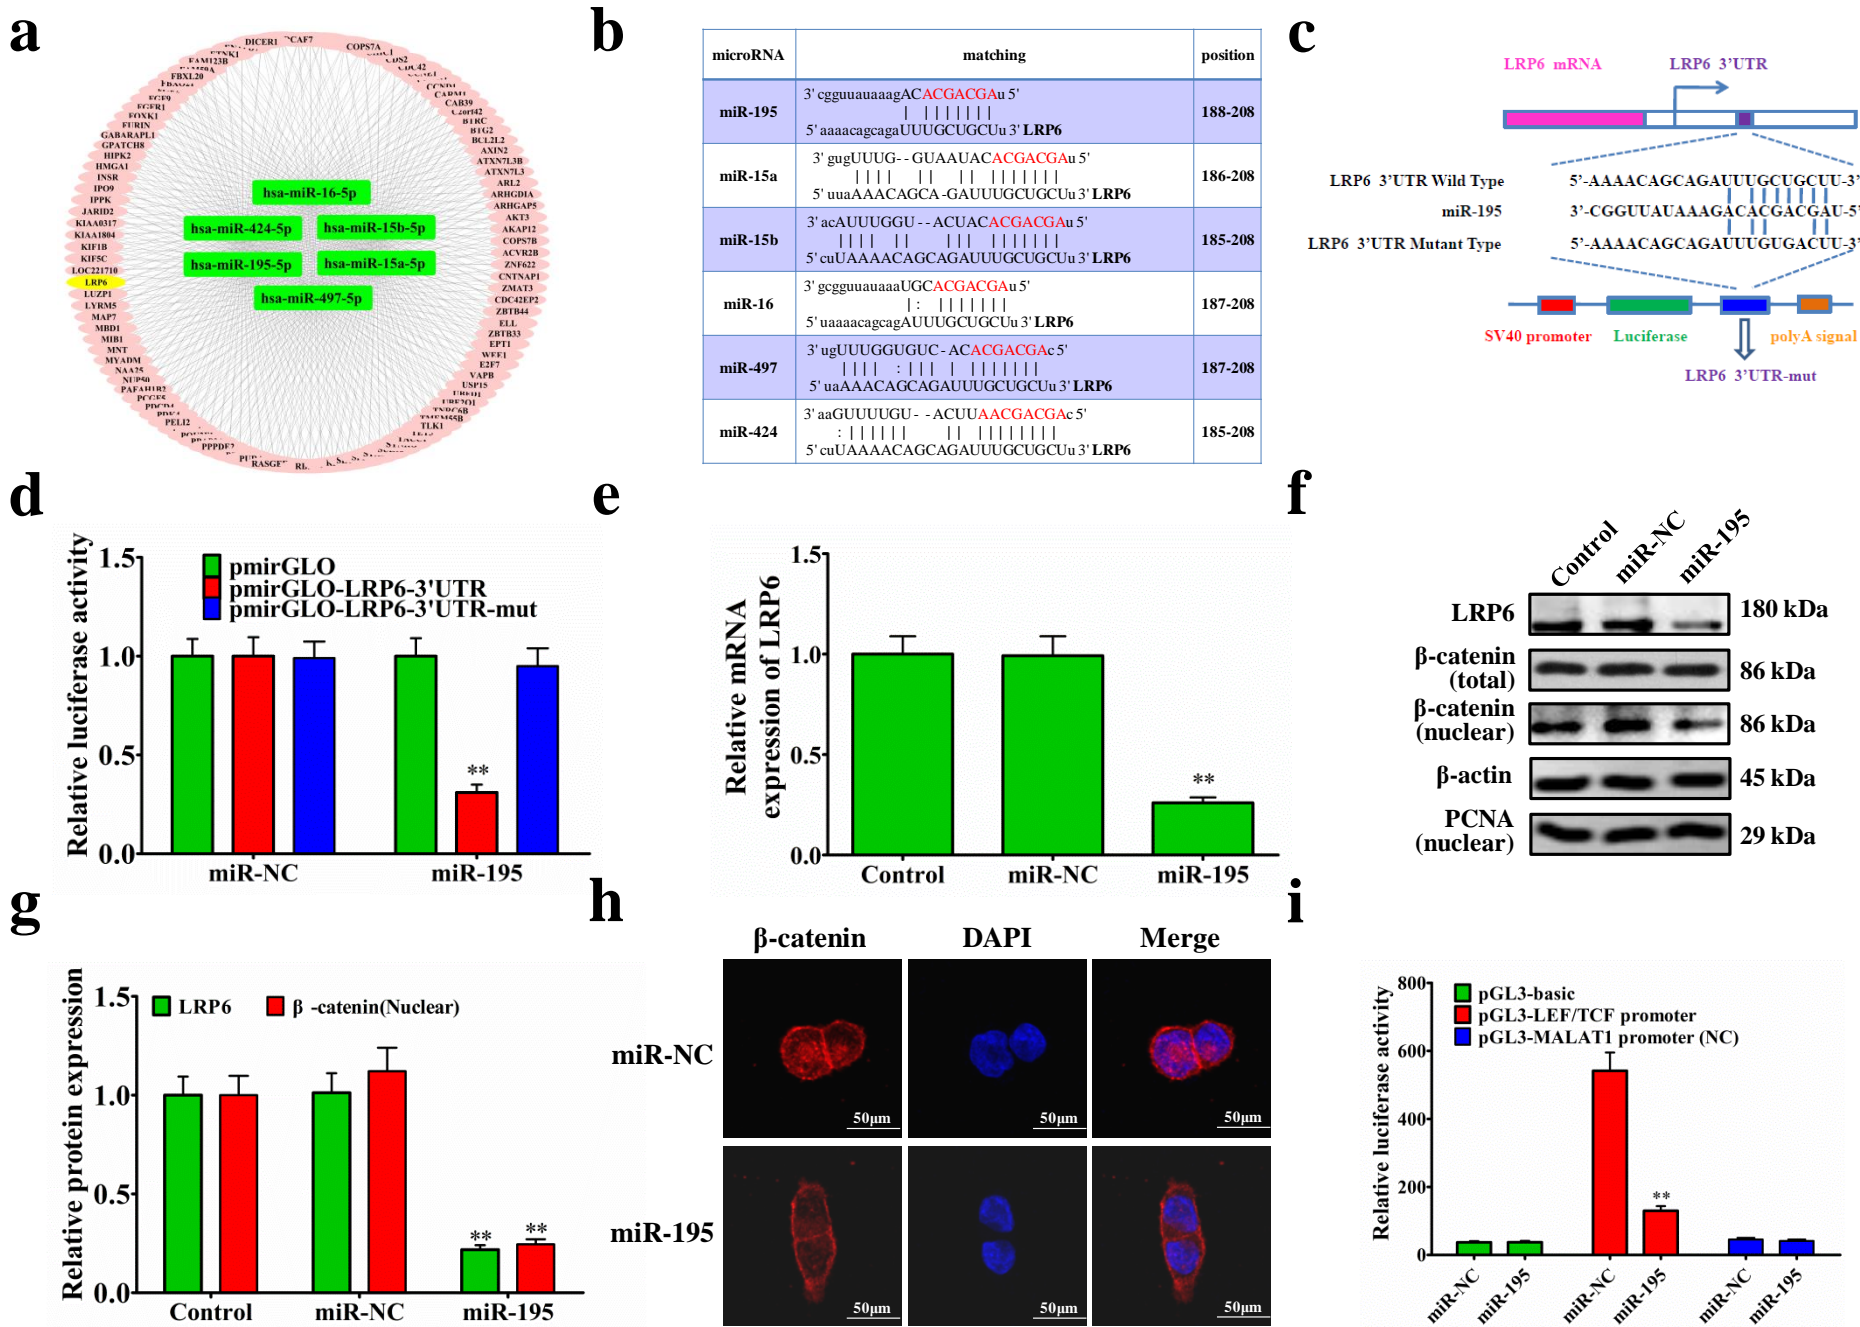



# Figure S6

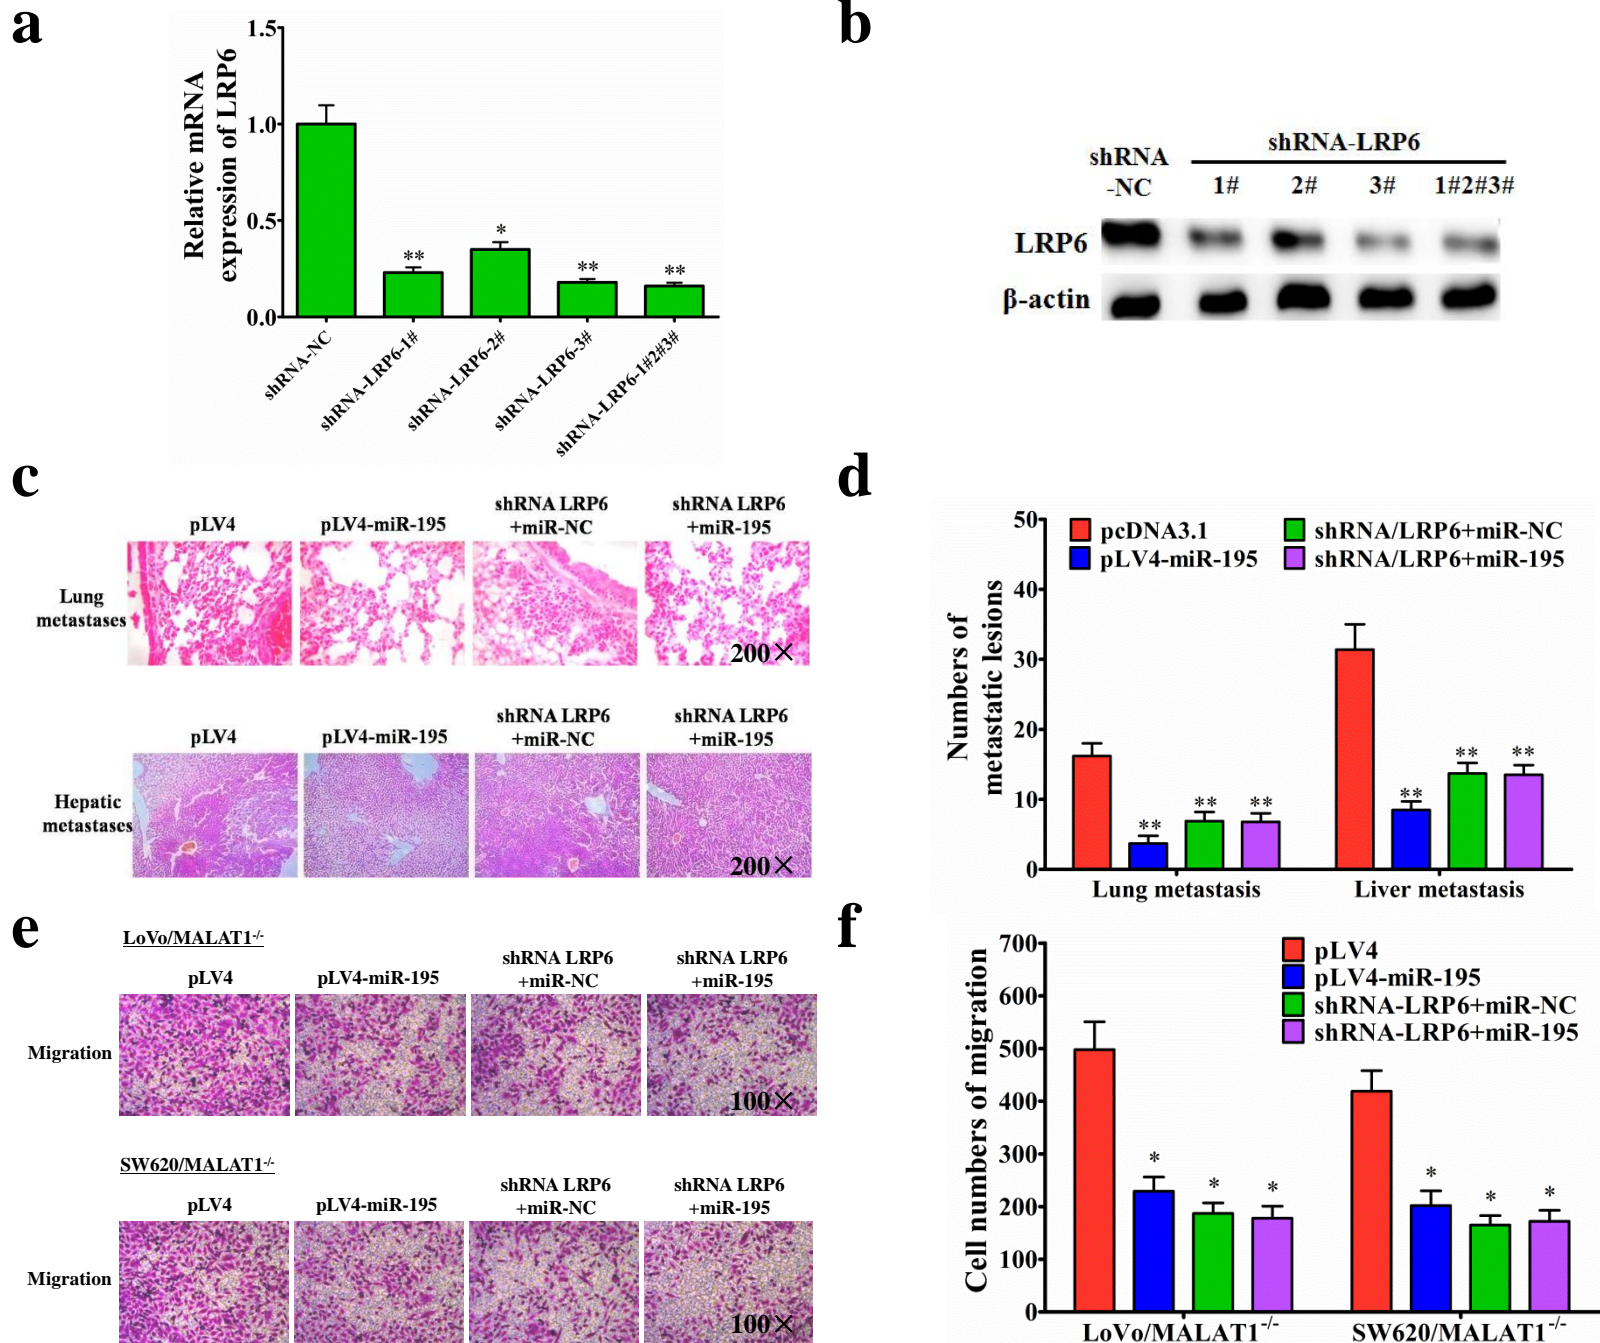

# Figure S7

**a**

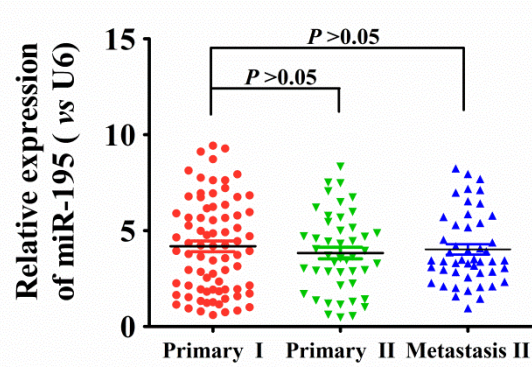

**b**

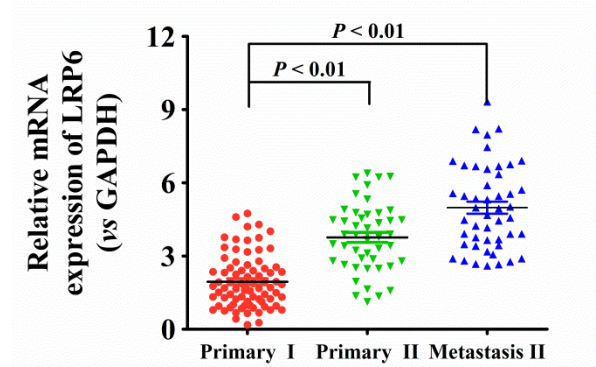

**c**

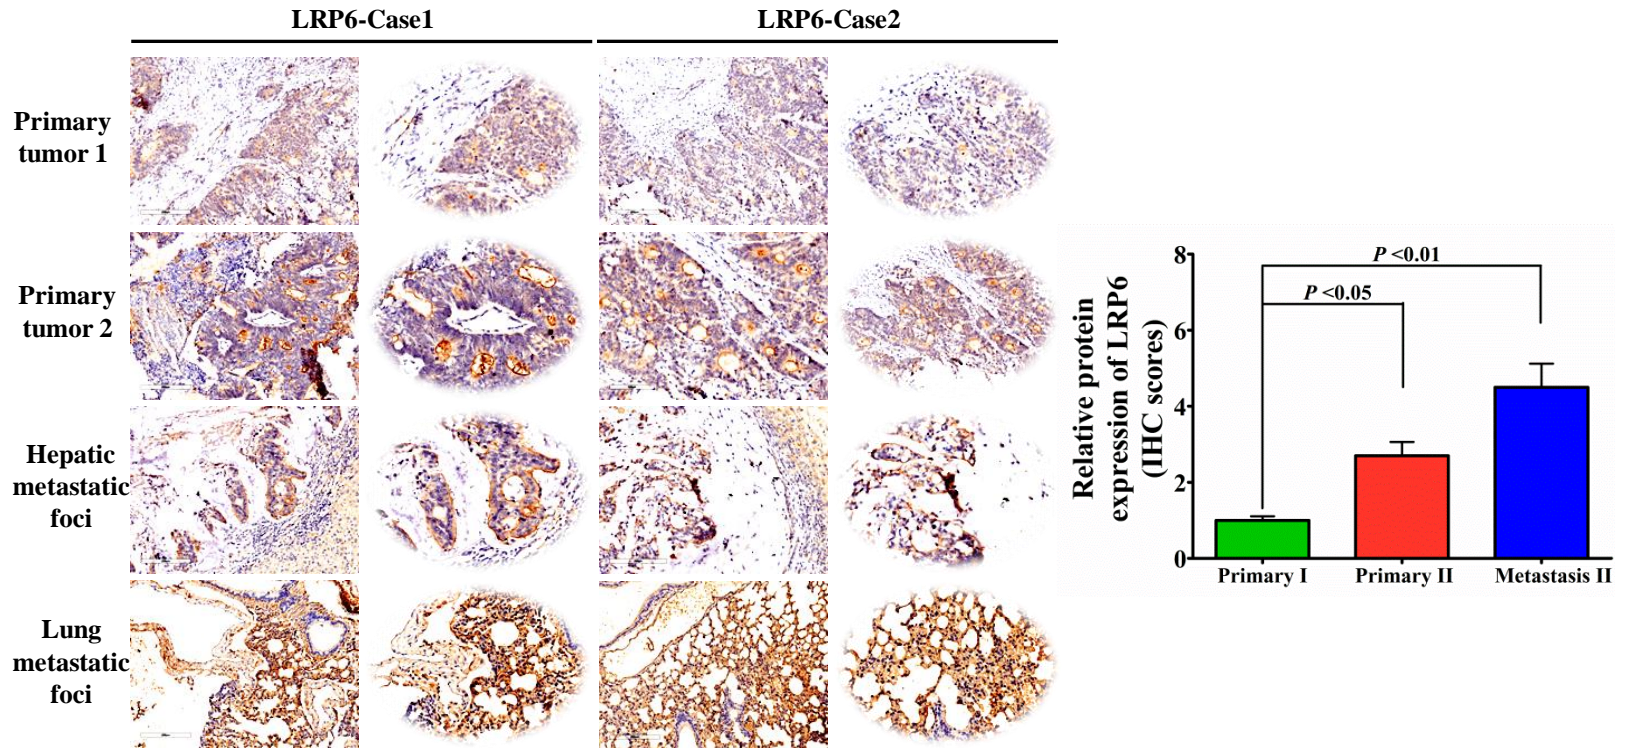



# Figure S8

**a**

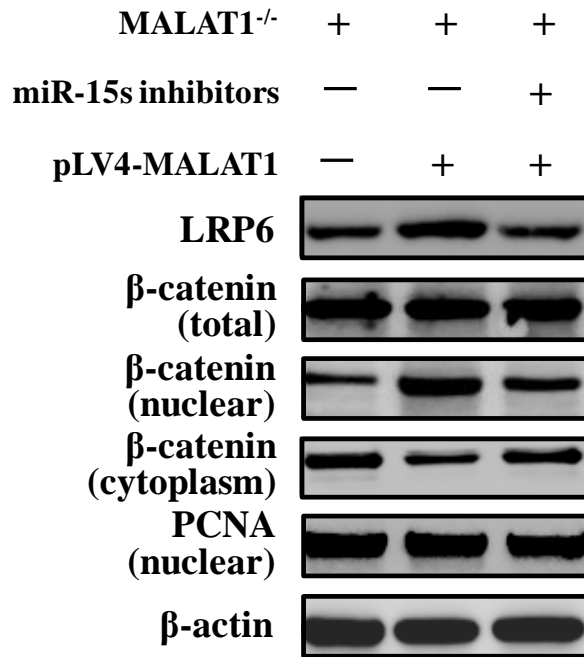

**b**

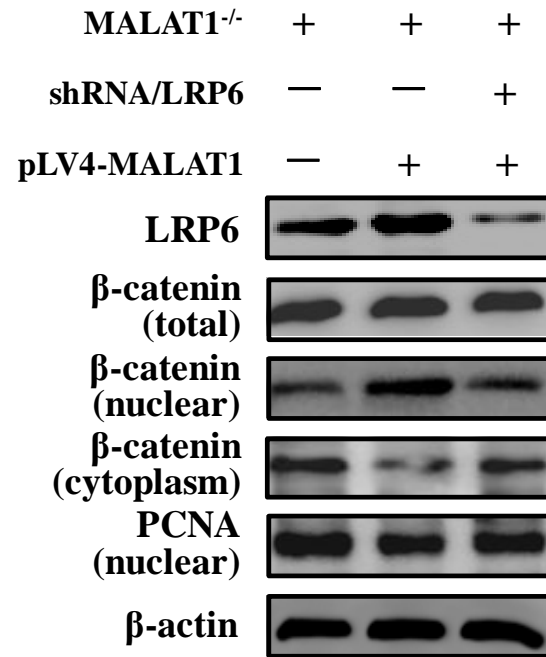



# Figure S9

**a**

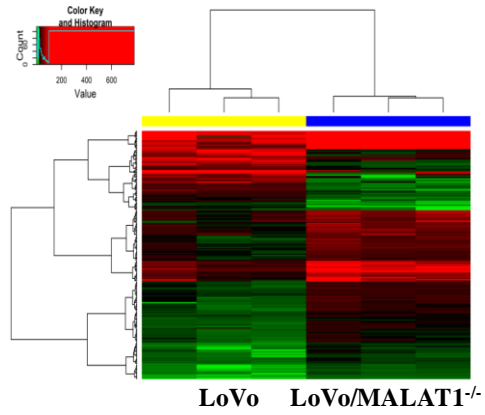

**b**

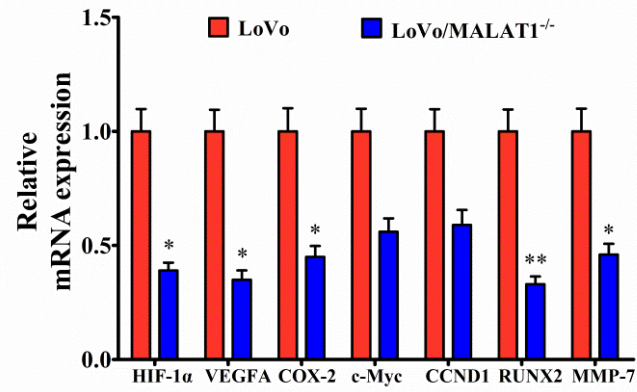

**c**

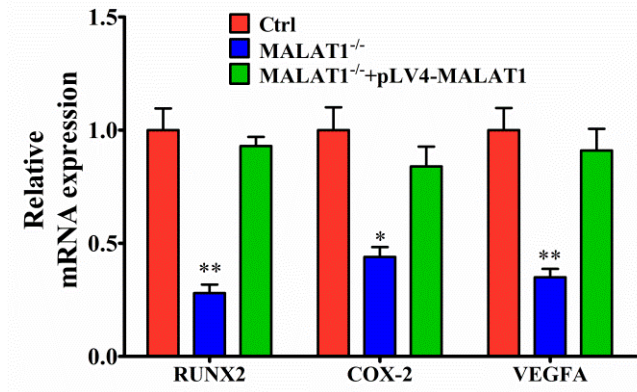

# Figure S10

**a**

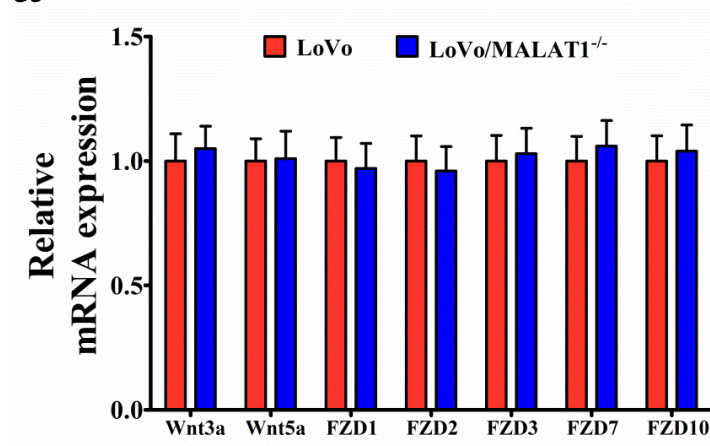

**b**

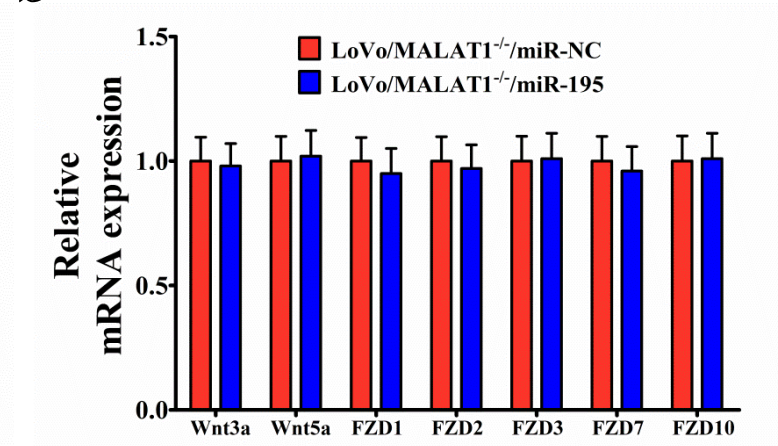

# Figure S11

**a**

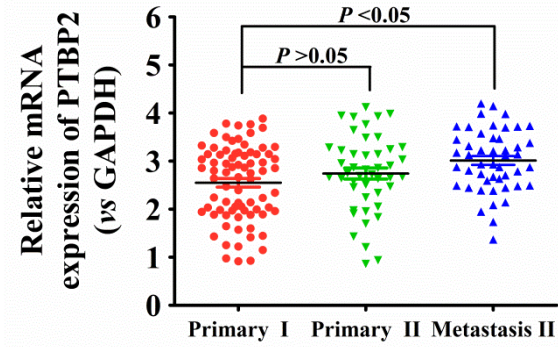

**b**

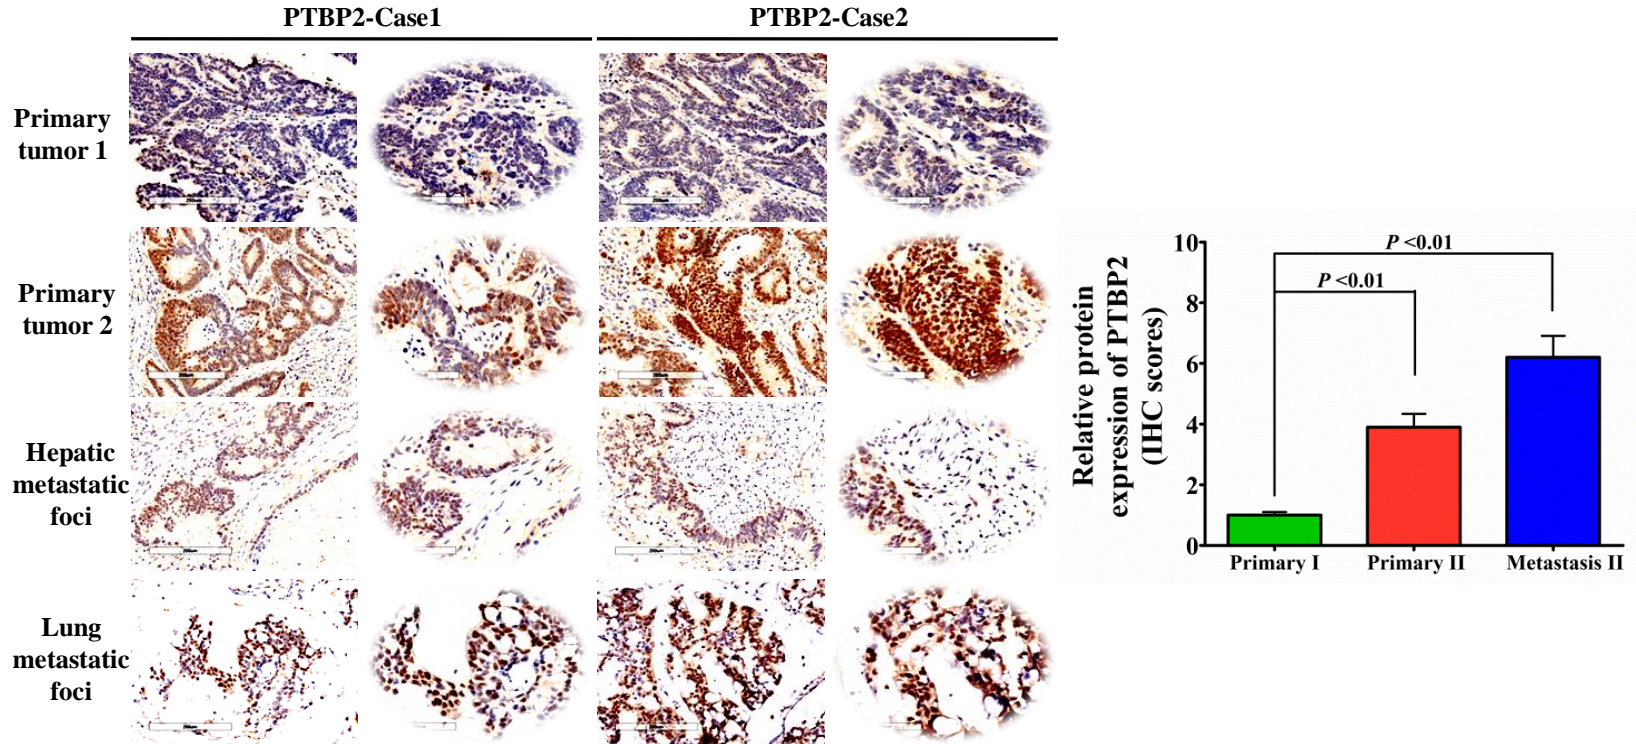

# Figure S12

**a** Secondary structure of RUNX2 5'UTR

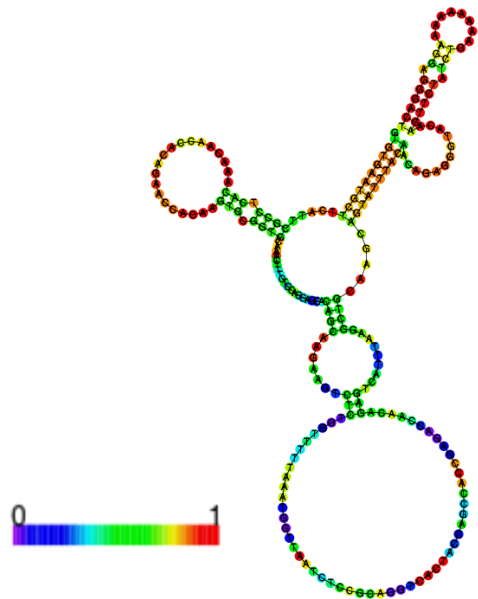

**b** Secondary structure of VEGFA 5'UTR

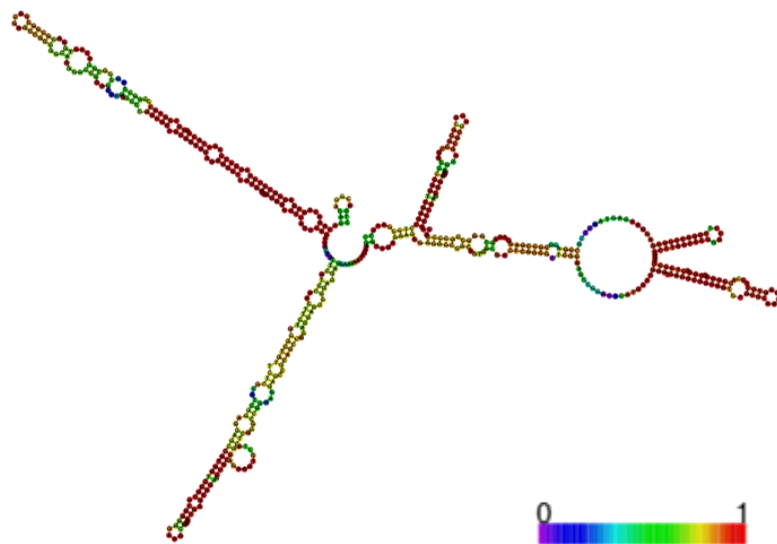

**c** Secondary structure of RUNX2 5'UTR-PPT domain

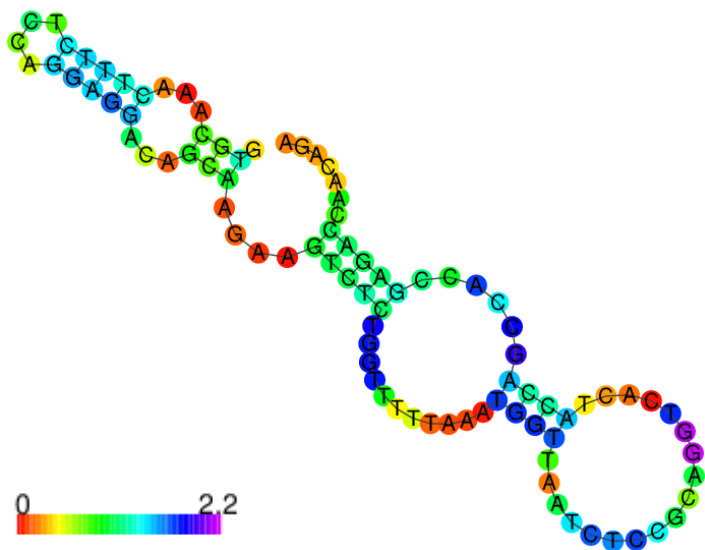

**d** Secondary structure of VEGFA 5'UTR-PPT domain

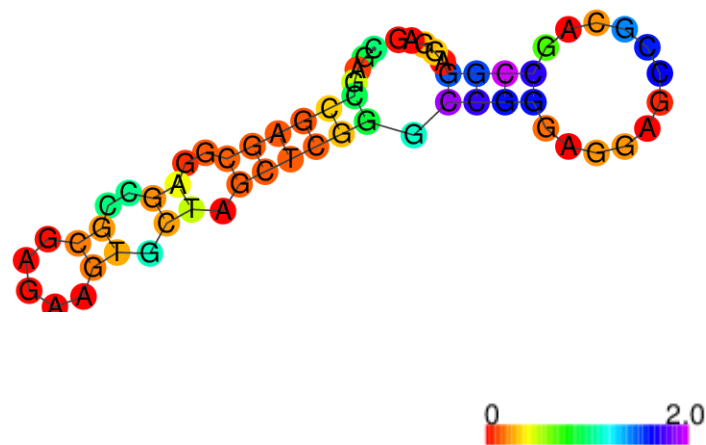



# Figure S13

## A

% VEGFA mRNA

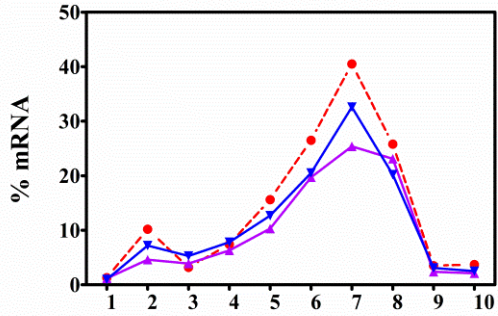

● Ctrl ▲ MALAT1<sup>-/-</sup> ■ MALAT1<sup>-/-</sup>+pLV4-MALAT1

## B

% COX-2 mRNA

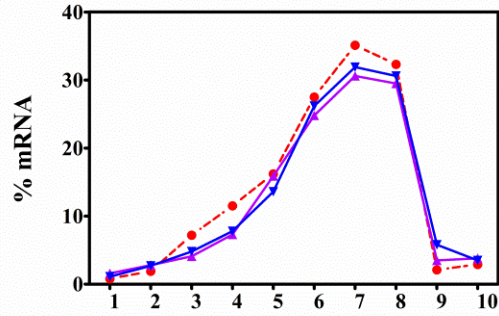

● Ctrl ▲ MALAT1<sup>-/-</sup> ■ MALAT1<sup>-/-</sup>+pLV4-MALAT1

## C

% GAPDH mRNA

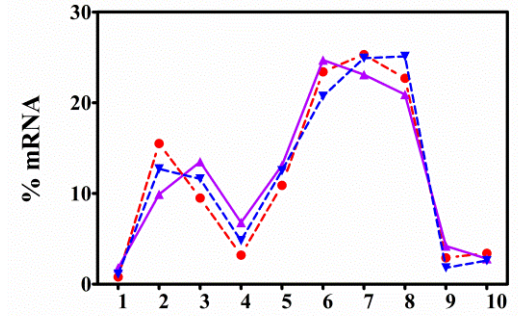

● Ctrl ▲ MALAT1<sup>-/-</sup> ■ MALAT1<sup>-/-</sup>+pLV4-MALAT1

# Figure S14

**a**

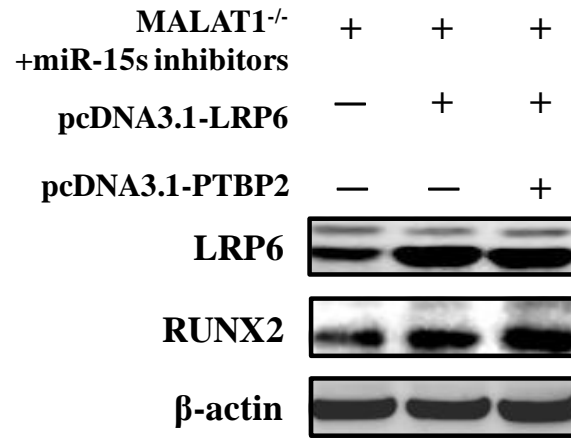

**b**

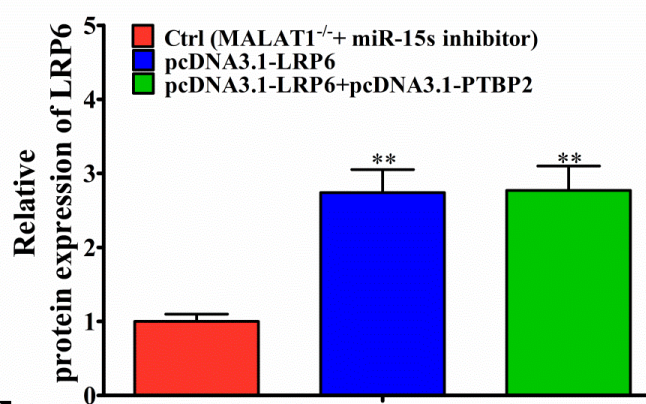

**c**

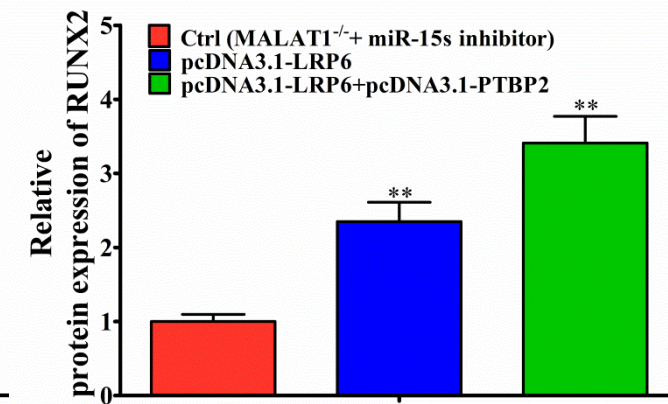

**d**

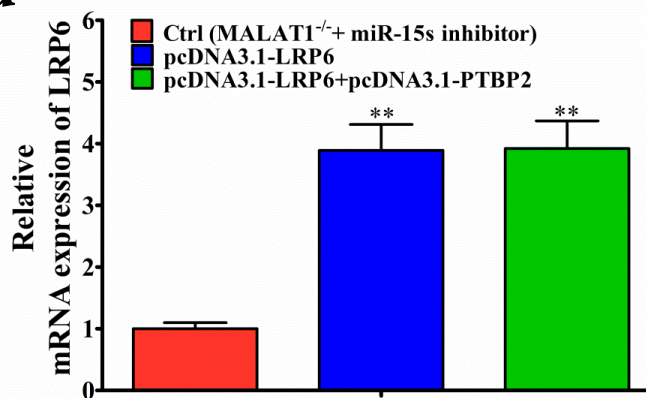

**e**

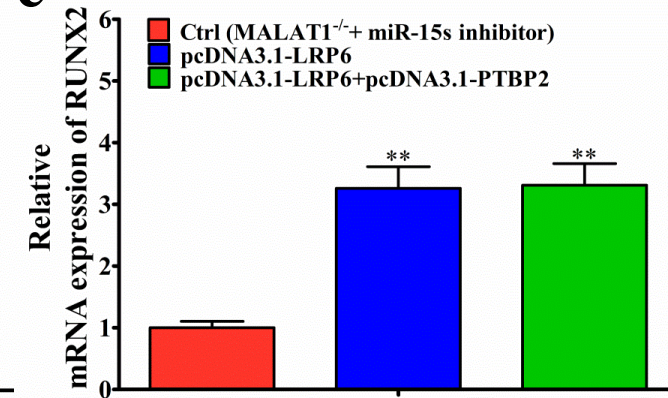

Supplement: 41419_2019_1598_MOESM1_ESM.pdf [file 41419_2019_1598_MOESM1_ESM.pdf]
