# Supplementary material for: RETRACTED ARTICLE: MALAT1 regulates the transcriptional and translational levels of proto-oncogene RUNX2 in colorectal cancer metastasis
Source: PubMed Central journal article supplement (PMC6522477; doi:10.1038/s41419-019-1598-x), 2019-05-16
Supplement: 41419_2019_1598_MOESM2_ESM.pdf [file 41419_2019_1598_MOESM2_ESM.pdf]

| gene__type__region | R2.L     | R3.L     | R7.L.T   | R2.C     | R3.C.T   | R7.C.T   | R4.C     | R8.T     | R10.T    | A.VS.B   | log A.VS.C | log B.VS.C | log A.VS.B | pv:A.VS.C | pv:B.VS.C | pvalue |
|--------------------|----------|----------|----------|----------|----------|----------|----------|----------|----------|----------|------------|------------|------------|-----------|-----------|--------|
| 7SK__lincRNA       | 1.53006  | 0.971798 | 0.258553 | 11.5012  | 4.33054  | 267.514  | 1.30591  | 1.69724  | 0.247013 | -6.68154 | -0.23563   | 6.445908   | 0.394322   | 0.627641  | 0.395406  |        |
| A2ML1-AS1__antise  | 2.1203   | 3.18583  | 1.52906  | 0.106344 | 7.26076  | 8.78339  | 0.157001 | 3.84176  | 0.361575 | -1.24052 | 0.648542   | 1.889067   | 0.371761   | 0.398758  | 0.251109  |        |
| A2MP1__pseudogen   | 0        | 0        | 0.743274 | 0        | 89.7731  | 116.861  | 0        | 0        | 0        | -8.11897 | #DIV/0!    | #DIV/0!    | 0.190106   | 0.42265   | 0.19043   |        |
| AATK-AS1__antisen  | 0        | 0        | 1.00642  | 0.206717 | 3.76798  | 11.245   | 1.116    | 0        | 0        | -3.91864 | -0.1491    | 3.769531   | 0.247971   | 0.957901  | 0.315406  |        |
| ABC7-42389800N19   | 4.8822   | 3.33095  | 22.1938  | 2.83774  | 9.04199  | 8.83533  | 20.8697  | 3.37455  | 4.41586  | 0.553721 | 0.085357   | -0.46836   | 0.618599   | 0.957818  | 0.763692  |        |
| ABCA11P__pseudoc   | 19.9985  | 4.46912  | 16.7822  | 31.3395  | 47.2806  | 17.687   | 11.2444  | 6.29043  | 5.88001  | -1.22325 | 0.816965   | 2.040219   | 0.282411   | 0.269713  | 0.107495  |        |
| ABCA17P__pseudoc   | 0.185338 | 0.700145 | 0.996312 | 0.224039 | 285.253  | 38.3867  | 0.933514 | 0.716436 | 4.55538  | -7.42713 | -1.7214    | 5.705735   | 0.352275   | 0.313647  | 0.359953  |        |
| ABCC13__pseudoge   | 0.167155 | 0.024572 | 0.293327 | 0.21533  | 122.616  | 9.77181  | 0.071567 | 2.40287  | 0.336729 | -8.09475 | -2.53495   | 5.559803   | 0.379635   | 0.435868  | 0.378557  |        |
| ABCC6P1__pseudoc   | 2.05604  | 1.618    | 0.872716 | 1.63038  | 3.83577  | 37.9507  | 1.49325  | 1.36427  | 0.695371 | -3.25535 | 0.355844   | 3.61119    | 0.395864   | 0.10665   | 0.383583  |        |
| ABCC6P2__pseudoc   | 1.17817  | 0.459075 | 0.242803 | 0.835908 | 0.365338 | 0.148134 | 1.08734  | 0.988381 | 0.382623 | 0.478473 | -0.38692   | -0.86539   | 0.165802   | 0.398357  | 0.100262  |        |
| ABHD17AP6__pseu    | 0.593563 | 0.25156  | 0.390578 | 0.549938 | 0.184863 | 30.7991  | 0.059263 | 0.458817 | 0.185521 | -4.6735  | 0.8125     | 5.486002   | 0.424746   | 0.495281  | 0.41866   |        |
| AC000036.4__antise | 0        | 0.034992 | 0.059408 | 9.04686  | 0.729343 | 2.10271  | 0.116355 | 0        | 0.016151 | -6.97539 | -0.48918   | 6.486204   | 0.268464   | 0.829423  | 0.262847  |        |
| AC000067.1__lincRN | 0        | 0        | 0        | 0        | 1.9993   | 0        | 0        | 0        | 0        | #NUM!    | #DIV/0!    | #DIV/0!    | 0.42265    | #DIV/0!   | 0.42265   |        |
| AC000068.5__antise | 0        | 0        | 0        | 1.1143   | 0        | 0        | 0        | 0        | 0        | #NUM!    | #DIV/0!    | #DIV/0!    | 0.42265    | #DIV/0!   | 0.42265   |        |
| AC002055.4__pseud  | 4.71687  | 1.48416  | 3.34662  | 3.71111  | 3.96951  | 12.6556  | 1.81189  | 3.20198  | 2.0894   | -1.09083 | 0.426662   | 1.517496   | 0.357022   | 0.60814   | 0.290152  |        |
| AC002056.3__pseud  | 3.12601  | 3.20035  | 5.92611  | 2.32152  | 1.66241  | 2.55111  | 1.6796   | 1.8487   | 3.01785  | 0.906805 | 0.904354   | -0.00245   | 0.130214   | 0.063544  | 0.992132  |        |
| AC002116.7__antise | 0.465092 | 0.9561   | 1.472    | 6.64024  | 19.7881  | 48.3233  | 1.98812  | 0.397548 | 0.669546 | -4.69137 | -0.07861   | 4.61276    | 0.184451   | 0.948314  | 0.198687  |        |
| AC002116.8__proce  | 1.30705  | 0.909296 | 1.94234  | 9.94345  | 5.25415  | 9.39286  | 2.47421  | 0.875833 | 1.41312  | -2.5639  | -0.19579   | 2.368107   | 0.03353    | 0.727767  | 0.027777  |        |
| AC002117.1__antise | 3.18302  | 2.61736  | 3.4965   | 3.42004  | 3.71129  | 43.0083  | 1.59793  | 3.08279  | 4.08074  | -2.43113 | 0.085575   | 2.516708   | 0.403441   | 0.823587  | 0.387055  |        |
| AC002310.12__antis | 0.598259 | 0.246423 | 0.450942 | 0.263684 | 0.786725 | 32.271   | 0.584757 | 0.496817 | 1.84189  | -4.68473 | -1.17403   | 3.510699   | 0.419033   | 0.335041  | 0.423299  |        |
| AC002310.7__antise | 2.27344  | 1.73321  | 0.905125 | 2.08552  | 2.74822  | 8.03076  | 1.44425  | 2.11699  | 2.07114  | -1.38908 | -0.1975    | 1.191579   | 0.362292   | 0.719149  | 0.307226  |        |
| AC002398.11__antis | 15.563   | 10.4312  | 9.69734  | 7.3774   | 3.49704  | 5.25668  | 11.5626  | 15.3986  | 16.4748  | 1.145736 | -0.28331   | -1.42904   | 0.027336   | 0.519558  | 0.066208  |        |
| AC002398.5__lincRN | 0        | 0        | 0.892667 | 0.238405 | 2.297    | 579.152  | 0.581956 | 0.075438 | 0        | -9.34791 | 0.441365   | 9.789271   | 0.420123   | 0.872847  | 0.420782  |        |
| AC002472.11__antis | 0.07807  | 0.138093 | 0.265882 | 0.138339 | 0.831915 | 0.80613  | 0.127604 | 0.611678 | 0.325912 | -1.8817  | -1.14388   | 0.737827   | 0.152172   | 0.29849   | 0.222957  |        |
| AC002511.1__lincRN | 0.008815 | 0.051967 | 1.11615  | 7.17406  | 31.1756  | 14.4018  | 2.16442  | 0.038578 | 0.067259 | -5.48611 | -0.94782   | 4.538284   | 0.139179   | 0.736689  | 0.158678  |        |
| AC002511.3__lincRN | 0        | 0        | 0.586598 | 0        | 4.92559  | 2.54791  | 0.509662 | 2.57458  | 0        | -3.67134 | -2.39447   | 1.276868   | 0.250025   | 0.463795  | 0.276811  |        |
| AC002539.1__antise | 0.236275 | 0.008706 | 1.2959   | 0        | 14.1716  | 77.3173  | 0.15135  | 1.57114  | 0.134424 | -5.89177 | -0.26915   | 5.622618   | 0.328441   | 0.906368  | 0.338288  |        |
| AC003051.1__lincRN | 0.368593 | 0.131793 | 3.17523  | 0.164063 | 134.877  | 899.74   | 1.92652  | 0.054148 | 1.49001  | -8.13712 | 0.082768   | 8.219892   | 0.343385   | 0.948474  | 0.344469  |        |
| AC003102.3__antise | 0.264779 | 0.582826 | 0.628345 | 0.25986  | 4.54465  | 10.0686  | 0.397685 | 0.197505 | 0.180397 | -3.33299 | 0.928283   | 4.261274   | 0.244488   | 0.332346  | 0.246541  |        |
| AC003665.1__antise | 9.61086  | 4.46292  | 3.13595  | 2.75211  | 44.8246  | 36.9843  | 2.63091  | 5.06505  | 16.6347  | -2.29677 | -0.49955   | 1.797217   | 0.267984   | 0.729673  | 0.221445  |        |
| AC003958.2__antise | 0.096955 | 0        | 0.110931 | 0.220827 | 3.31183  | 131.998  | 0.703703 | 23.5574  | 0.289467 | -9.34861 | -6.88382   | 2.464791   | 0.407797   | 0.403619  | 0.519164  |        |
| AC003973.4__lincRN | 0        | 0        | 0.046934 | 0.186446 | 1.06103  | 9.70147  | 0.206618 | 0        | 0.076471 | -7.86593 | -2.59254   | 5.273395   | 0.352071   | 0.346758  | 0.364068  |        |
| AC004019.18__lincR | 0.404658 | 0.022725 | 0.038562 | 0.153337 | 9.99438  | 1.60179  | 0.509539 | 0.063122 | 1.21328  | -4.65629 | -1.93845   | 2.717844   | 0.354774   | 0.354198  | 0.421586  |        |
| AC004051.2__lincRN | 0        | 0.036445 | 0.12374  | 0        | 2.68864  | 25.4267  | 0.189026 | 0        | 0.100912 | -7.45548 | -0.85601   | 6.599469   | 0.365609   | 0.613564  | 0.369228  |        |

|                    |          |          |          |          |          |          |          |          |          |          |          |          |          |          |          |
|--------------------|----------|----------|----------|----------|----------|----------|----------|----------|----------|----------|----------|----------|----------|----------|----------|
| AC004053.1__antise | 1.55318  | 6.55792  | 0.856176 | 7.22497  | 17.7302  | 79.6174  | 0.374113 | 1.37457  | 0.882206 | -3.54369 | 1.769119 | 5.31281  | 0.307879 | 0.311807 | 0.270747 |
| AC004066.3__antise | 1.02903  | 24.354   | 2.13123  | 5.71618  | 38.0434  | 10.749   | 3.55181  | 8.65786  | 2.62086  | -0.9863  | 0.891609 | 1.877913 | 0.074595 | 0.539585 | 0.250528 |
| AC004069.2__lincRN | 2.36853  | 0.859025 | 0.49183  | 0.98345  | 2.72391  | 7.35041  | 0.368813 | 0.602056 | 0.6879   | -1.57192 | 1.164951 | 2.736876 | 0.414909 | 0.41269  | 0.226903 |
| AC004125.3__lincRN | 0        | 0        | 0        | 0        | 9.45354  | 4.4985   | 0        | 0        | 0.756072 | #NUM!    | #NUM!    | 4.205809 | 0.230586 | 0.42265  | 0.250671 |
| AC004158.2__lincRN | 1.32775  | 67.2316  | 3.54985  | 8.30759  | 22.4113  | 579.152  | 25.6708  | 22.9064  | 8.56126  | -3.08025 | 0.335721 | 3.41597  | 0.462272 | 0.829914 | 0.440979 |
| AC004158.3__lincRN | 0        | 0        | 0        | 0        | 0        | 0        | 0        | 0        | 0        | #DIV/0!  | #DIV/0!  | #DIV/0!  | #DIV/0!  | #DIV/0!  | #DIV/0!  |
| AC004231.2__antise | 32.1218  | 50.1039  | 3.35768  | 5.00996  | 10.7673  | 7.6922   | 24.0743  | 21.978   | 85.7439  | 1.866546 | -0.62291 | -2.48945 | 0.252433 | 0.694817 | 0.229056 |
| AC004449.6__lincRN | 0        | 0        | 0        | 0        | 0.199982 | 0        | 0.371999 | 0        | 0.309483 | #NUM!    | #NUM!    | -1.76881 | 0.42265  | 0.186917 | 0.46907  |
| AC004490.1__antise | 0        | 0        | 0        | 0        | 0        | 0        | 0        | 0        | 0        | #DIV/0!  | #DIV/0!  | #DIV/0!  | #DIV/0!  | #DIV/0!  | #DIV/0!  |
| AC004528.4__antise | 0        | 0        | 0.696754 | 0.809492 | 0.836625 | 5.55888  | 0.054567 | 0.060882 | 0        | -3.37028 | 2.593394 | 5.96367  | 0.248425 | 0.521596 | 0.277248 |
| AC004603.4__lincRN | 0.016149 | 0.057134 | 0.145477 | 0.085761 | 0.513619 | 446.696  | 0.609995 | 0        | 0        | -10.9977 | -1.47945 | 9.518215 | 0.42197  | 0.632159 | 0.422664 |
| AC004702.2__lincRN | 1.69353  | 1.74417  | 2.2936   | 11.3518  | 60.4742  | 60.7793  | 3.78884  | 3.84035  | 1.68078  | -4.53213 | -0.69991 | 3.832218 | 0.122168 | 0.31732  | 0.134032 |
| AC004832.1__pseud  | 0        | 0        | 0.24997  | 0        | 1.34608  | 0.519085 | 0.390042 | 0        | 0        | -2.89948 | -0.64187 | 2.257602 | 0.320666 | 0.825435 | 0.430133 |
| AC005042.4__antise | 0        | 0.778356 | 0.163723 | 3.82227  | 152.22   | 30.9897  | 16.4439  | 0.04457  | 0.574236 | -7.63322 | -4.17885 | 3.454367 | 0.305026 | 0.434738 | 0.369729 |
| AC005152.2__proce  | 17.7964  | 44.5644  | 62.7551  | 17.7812  | 92.2688  | 28.3183  | 9.2975   | 16.68    | 23.948   | -0.14525 | 1.325416 | 1.470665 | 0.869955 | 0.105591 | 0.329791 |
| AC005152.3__lincRN | 0        | 0.109363 | 0        | 0.204458 | 0.275263 | 2.41697  | 0.163933 | 0.438903 | 0        | -4.72721 | -2.46264 | 2.264568 | 0.338097 | 0.22593  | 0.453387 |
| AC005176.2__pseud  | 0        | 0.019519 | 0.231921 | 0.065913 | 0.194435 | 0.797031 | 0.348801 | 0        | 0.108062 | -2.07221 | -0.86155 | 1.210659 | 0.21826  | 0.680022 | 0.549581 |
| AC005220.3__antise | 0.057905 | 0.136673 | 0        | 0        | 1.87435  | 0        | 0.220801 | 0        | 0        | -3.26797 | -0.1824  | 3.085572 | 0.442199 | 0.9288   | 0.49416  |
| AC005235.1__lincRN | 1.54204  | 0        | 0.105557 | 0.062292 | 14.2549  | 5.53811  | 0.160858 | 0.165517 | 0.41136  | -3.59109 | 1.159189 | 4.750278 | 0.314119 | 0.631176 | 0.263844 |
| AC005255.3__pseud  | 26.6001  | 0        | 0        | 4.03373  | 0        | 0        | 0        | 0        | 13.4069  | 2.721245 | 0.988456 | -1.73279 | 0.42265  | 0.744288 | 0.613473 |
| AC005280.1__pseud  | 2.97545  | 1.86085  | 3.38383  | 1.6575   | 2.06885  | 0        | 2.51749  | 2.52975  | 0        | 1.141398 | 0.703667 | -0.43773 | 0.286717 | 0.473537 | 0.218399 |
| AC005301.8__lincRN | 0        | 0        | 0.031351 | 0        | 10.3129  | 1.78274  | 0.245132 | 0        | 0.034018 | -8.59176 | -3.15446 | 5.437301 | 0.334135 | 0.416402 | 0.347963 |
| AC005307.1__lincRN | 0        | 0        | 0        | 0        | 0.375948 | 2.19368  | 0.03835  | 0        | 0.063874 | #NUM!    | #NUM!    | 4.651759 | 0.333423 | 0.207824 | 0.34142  |
| AC005307.3__lincRN | 0        | 0.033327 | 1.31647  | 0.200565 | 29.883   | 167.196  | 0.181209 | 0.061841 | 0.082146 | -7.19136 | 2.053359 | 9.244715 | 0.328839 | 0.525954 | 0.330138 |
| AC005324.6__antise | 0        | 0        | 8.10317  | 0.803001 | 3.60146  | 1.88712  | 0.299263 | 0        | 0.123305 | 0.365064 | 4.261231 | 3.896167 | 0.855311 | 0.444692 | 0.16162  |
| AC005329.7__antise | 10.6602  | 0.216181 | 0.7022   | 0.406375 | 4.10157  | 0.770453 | 0.149212 | 0.319277 | 0.333703 | 1.133286 | 3.851367 | 2.718081 | 0.668285 | 0.408464 | 0.32278  |
| AC005358.3__antise | 0        | 0        | 4.22885  | 0.073919 | 2.37507  | 17.0123  | 0.027319 | 0        | 0        | -2.20227 | 7.274201 | 9.476471 | 0.32363  | 0.426392 | 0.346802 |
| AC005484.5__proce  | 13.4294  | 4.70581  | 2.66045  | 2.66828  | 23.1569  | 19.7429  | 1.30041  | 4.86877  | 2.96188  | -1.13174 | 1.187428 | 2.319169 | 0.477073 | 0.444977 | 0.153722 |
| AC005523.3__lincRN | 4.01764  | 1.7175   | 3.53826  | 1.96945  | 2.10181  | 7.90505  | 0.778068 | 3.9895   | 3.56333  | -0.36901 | 0.154626 | 0.52364  | 0.677481 | 0.862481 | 0.568884 |
| AC005562.1__proce  | 3.10377  | 4.42578  | 0.86947  | 12.3296  | 23.2861  | 158.398  | 19.0656  | 2.10621  | 0.561114 | -4.52979 | -1.37159 | 3.158204 | 0.325676 | 0.522804 | 0.375972 |
| AC005606.14__lincR | 2.20058  | 1.46828  | 1.08627  | 0.920972 | 1.45061  | 3.98015  | 0.701328 | 3.46426  | 2.73256  | -0.41767 | -0.53672 | -0.11906 | 0.70868  | 0.58624  | 0.867391 |
| AC005614.5__proce  | 1.04386  | 4.97805  | 5.01157  | 1.99545  | 14.2549  | 79.1978  | 5.59438  | 0        | 0        | -3.11283 | 0.979838 | 4.092667 | 0.348177 | 0.626275 | 0.355971 |
| AC005616.1__lincRN | 0        | 0        | 0        | 0.394256 | 6.15236  | 21.4508  | 0.568608 | 0        | 0.026954 | #NUM!    | #NUM!    | 5.554898 | 0.275764 | 0.395959 | 0.290257 |
| AC005703.3__lincRN | 0        | 0        | 0.034309 | 0.159241 | 0.128107 | 0        | 0.083973 | 0.037448 | 0.018649 | -3.06614 | -2.02948 | 1.036656 | 0.29504  | 0.345323 | 0.287241 |
| AC005772.2__lincRN | 0        | 0        | 0.134384 | 0.118048 | 2.0354   | 7.65906  | 0        | 0        | 0        | -6.19019 | #DIV/0!  | #DIV/0!  | 0.283264 | 0.42265  | 0.285212 |

|                    |          |          |          |          |         |          |          |          |          |          |          |          |          |          |          |
|--------------------|----------|----------|----------|----------|---------|----------|----------|----------|----------|----------|----------|----------|----------|----------|----------|
| AC005775.2__antise | 0.921028 | 1.56355  | 1.95658  | 2.32295  | 2.24993 | 4.16703  | 3.14825  | 0.941079 | 0.76897  | -0.97668 | -0.12952 | 0.847167 | 0.082831 | 0.90736  | 0.399789 |
| AC005785.2__proce  | 0        | 0        | 0        | 1.04553  | 0       | 0        | 0        | 0        | 0        | #NUM!    | #DIV/0!  | #DIV/0!  | 0.42265  | #DIV/0!  | 0.42265  |
| AC005786.7__antise | 0        | 0        | 0        | 8.14485  | 4.11038 | 8.13811  | 0        | 0        | 0        | #NUM!    | #DIV/0!  | #DIV/0!  | 0.036922 | #DIV/0!  | 0.036922 |
| AC005822.1__pseud  | 13.9569  | 29.4429  | 22.8209  | 26.4071  | 4.76607 | 10.5982  | 14.6741  | 27.4288  | 23.2241  | 0.664768 | 0.019603 | -0.64516 | 0.532923 | 0.762842 | 0.522349 |
| AC005863.2__lincR  | 0        | 0        | 1.01804  | 0        | 136.332 | 17.5893  | 0        | 0        | 0        | -7.24025 | #DIV/0!  | #DIV/0!  | 0.357203 | 0.42265  | 0.353519 |
| AC006076.1__lincR  | 0        | 0        | 0        | 0        | 8.73296 | 5.22329  | 0        | 0        | 0        | #NUM!    | #DIV/0!  | #DIV/0!  | 0.208158 | #DIV/0!  | 0.208158 |
| AC006115.3__antise | 1.09346  | 0.352373 | 2.32258  | 0.228572 | 23.6403 | 27.7382  | 1.12868  | 0.215406 | 0.181699 | -3.77554 | 1.304405 | 5.079945 | 0.199019 | 0.396526 | 0.200788 |
| AC006116.17__antis | 0.693959 | 1.32665  | 0.901341 | 0.10533  | 1.41808 | 6.5313   | 1.04297  | 1.29553  | 1.0091   | -1.4629  | -0.1962  | 1.266705 | 0.476559 | 0.329637 | 0.514928 |
| AC006129.2__lincR  | 0.694565 | 0.054837 | 0.209275 | 0.459761 | 1.93517 | 8.24658  | 1.44409  | 1.60275  | 0.151548 | -3.47251 | -1.73823 | 1.734286 | 0.323006 | 0.248549 | 0.473464 |
| AC006160.5__antise | 10.2369  | 8.39493  | 3.57596  | 6.37212  | 8.62897 | 15.4139  | 5.63455  | 7.95517  | 2.80554  | -0.45372 | 0.437787 | 0.891504 | 0.619557 | 0.284015 | 0.360027 |
| AC006196.1__lincR  | 0        | 0        | 0.041308 | 0        | 1.61149 | 0        | 0.050592 | 0.022558 | 0.06742  | -5.28585 | -1.76681 | 3.519039 | 0.437634 | 0.064178 | 0.46628  |
| AC006227.1__lincR  | 0        | 0        | 1.91434  | 0        | 29.1989 | 6.00192  | 1.00484  | 0        | 0        | -4.20069 | 0.929881 | 5.130571 | 0.348182 | 0.757127 | 0.338066 |
| AC006262.10__antis | 0        | 0        | 1.51574  | 0.058745 | 5.8575  | 2.61394  | 0.130511 | 0.388216 | 0.144868 | -2.49255 | 1.191647 | 3.684202 | 0.320488 | 0.656133 | 0.24319  |
| AC006262.5__lincR  | 0.149814 | 0        | 0        | 0.192665 | 1.19455 | 4.34115  | 2.2116   | 0.027455 | 0.087288 | -5.25688 | -3.95682 | 1.30006  | 0.284702 | 0.391118 | 0.595114 |
| AC006296.1__lincR  | 0        | 0        | 0        | 0        | 4.94674 | 0        | 0        | 0        | 0        | #NUM!    | #DIV/0!  | #DIV/0!  | 0.42265  | #DIV/0!  | 0.42265  |
| AC006296.2__lincR  | 0        | 0        | 0        | 0        | 2.1409  | 2.56762  | 0.787619 | 0        | 0        | #NUM!    | #NUM!    | 2.579704 | 0.186836 | 0.42265  | 0.340903 |
| AC006369.2__antise | 5.76342  | 3.86137  | 3.38334  | 3.15954  | 4.89424 | 41.3011  | 1.29023  | 6.77724  | 5.59681  | -1.92378 | -0.071   | 1.852783 | 0.448075 | 0.934461 | 0.424458 |
| AC006369.3__lincR  | 0        | 0        | 0        | 0        | 4.65352 | 2.80671  | 0.641224 | 0.124541 | 0.247296 | #NUM!    | #NUM!    | 2.880499 | 0.207428 | 0.162588 | 0.289847 |
| AC006445.8__lincR  | 0.034794 | 0.041032 | 0.104464 | 0.138521 | 1.1629  | 0.299257 | 0.170447 | 0.114017 | 0.05678  | -3.15029 | -0.92048 | 2.229808 | 0.282767 | 0.423719 | 0.324864 |
| AC006538.1__sense  | 0.058129 | 0.045703 | 0.271432 | 0        | 1.1559  | 3.19433  | 0.189761 | 0.084628 | 0.189636 | -3.53511 | -0.3063  | 3.228819 | 0.266128 | 0.679291 | 0.297876 |
| AC006552.1__lincR  | 0.026953 | 0        | 0.067461 | 0.017907 | 1.18544 | 0.025804 | 0.02643  | 0        | 0        | -3.70253 | 1.836843 | 5.539369 | 0.447701 | 0.41819  | 0.414387 |
| AC006994.2__antise | 3.20768  | 0        | 0.107174 | 0        | 2.51265 | 6.27094  | 0.069993 | 0        | 0        | -1.40587 | 5.565583 | 6.971448 | 0.572682 | 0.403277 | 0.255354 |
| AC007040.5__lincR  | 0        | 0        | 0.60331  | 0        | 0       | 0        | 0        | 0        | 0.129416 | #DIV/0!  | 2.220884 | #NUM!    | 0.42265  | 0.42265  | 0.42265  |
| AC007040.6__antise | 5.26777  | 3.23849  | 5.12886  | 3.86286  | 8.82401 | 14.0192  | 3.14675  | 5.46527  | 6.17691  | -0.96984 | -0.11719 | 0.85265  | 0.287589 | 0.794964 | 0.196339 |
| AC007040.8__antise | 0.077268 | 0        | 0.465934 | 0.204519 | 27.9071 | 34.3314  | 1.09277  | 0.056176 | 0        | -6.84491 | -1.08075 | 5.764158 | 0.185605 | 0.687382 | 0.199664 |
| AC007092.1__lincR  | 0        | 0.017875 | 2.49356  | 19.9059  | 11.4052 | 95.6924  | 3.57415  | 0.024887 | 0.072994 | -5.66021 | -0.54807 | 5.112146 | 0.251132 | 0.844772 | 0.270954 |
| AC007099.1__antise | 3.80492  | 0.481753 | 3.63118  | 5.25563  | 6.70575 | 79.6536  | 0.642725 | 0.413308 | 0.221572 | -3.5324  | 2.631667 | 6.16407  | 0.366599 | 0.175673 | 0.346529 |
| AC007099.2__antise | 0        | 0        | 1.00464  | 0        | 0       | 0        | 0.276897 | 0        | 0        | #DIV/0!  | 1.859257 | #NUM!    | 0.42265  | 0.596812 | 0.42265  |
| AC007106.1__lincR  | 0        | 0        | 0        | 0        | 2.41206 | 0        | 0        | 0        | 0        | #NUM!    | #DIV/0!  | #DIV/0!  | 0.42265  | #DIV/0!  | 0.42265  |
| AC007131.1__lincR  | 0.014758 | 0        | 0.073869 | 0.117614 | 2.43892 | 34.3314  | 0.086807 | 0        | 0.080329 | -8.70119 | -0.9152  | 7.785988 | 0.381381 | 0.373397 | 0.382583 |
| AC007131.2__lincR  | 0        | 4.0834   | 0.634849 | 7.68972  | 91.5996 | 1158.3   | 0.411079 | 0.975549 | 20.059   | -8.05819 | -2.18436 | 5.873833 | 0.37696  | 0.509158 | 0.374981 |
| AC007163.3__lincR  | 0        | 0.069103 | 0.299196 | 0        | 18.6658 | 3.29436  | 0.278408 | 0.016011 | 0.127585 | -5.89787 | -0.19638 | 5.701488 | 0.338191 | 0.906419 | 0.342714 |
| AC007163.6__antise | 0        | 29.3844  | 32.7681  | 11.4707  | 43.9205 | 9.53611  | 21.1377  | 27.0906  | 26.67    | -0.06301 | -0.26912 | -0.20611 | 0.946075 | 0.667309 | 0.777641 |
| AC007179.1__lincR  | 0        | 0        | 0        | 0        | 6.22871 | 0        | 0        | 0        | 0        | #NUM!    | #DIV/0!  | #DIV/0!  | 0.42265  | #DIV/0!  | 0.42265  |
| AC007182.6__antise | 0        | 0        | 0        | 0        | 2.69989 | 1.93288  | 0        | 0        | 0        | #NUM!    | #DIV/0!  | #DIV/0!  | 0.194469 | #DIV/0!  | 0.194469 |

|                    |          |          |          |          |          |          |          |          |          |          |          |          |          |          |          |
|--------------------|----------|----------|----------|----------|----------|----------|----------|----------|----------|----------|----------|----------|----------|----------|----------|
| AC007193.6__lincRN | 1.78909  | 0.741878 | 4.06967  | 1.47531  | 31.1756  | 86.9931  | 2.21988  | 0.101707 | 0.713656 | -4.18    | 1.120793 | 5.300792 | 0.261136 | 0.402226 | 0.265883 |
| AC007228.11__antis | 0.969837 | 3.66097  | 1.0349   | 0.33648  | 0.827697 | 17.7253  | 1.13864  | 1.7702   | 0.409407 | -1.73725 | 0.771835 | 2.50909  | 0.549334 | 0.321901 | 0.482142 |
| AC007228.5__lincRN | 15.2672  | 9.75863  | 8.78234  | 7.84981  | 4.96     | 6.02817  | 2.51492  | 6.79292  | 7.35268  | 0.843728 | 1.020938 | 0.177211 | 0.065985 | 0.2483   | 0.783039 |
| AC007238.1__pseud  | 22.8657  | 16.0006  | 9.23991  | 10.5361  | 10.7207  | 6.81513  | 12.1404  | 13.2093  | 20.8185  | 0.777095 | 0.059324 | -0.71777 | 0.15137  | 0.930189 | 0.270041 |
| AC007246.3__antise | 12.5575  | 59.5484  | 9.53305  | 25.8061  | 929.497  | 183.916  | 132.244  | 17.8591  | 111.204  | -3.80264 | -1.67842 | 2.124227 | 0.311893 | 0.361575 | 0.449485 |
| AC007250.4__lincRN | 0        | 0        | 0        | 0        | 1.68133  | 0.068093 | 1.07146  | 0        | 0        | #NUM!    | #NUM!    | 0.707301 | 0.399759 | 0.42265  | 0.803786 |
| AC007308.6__antise | 0        | 0        | 0.223077 | 0        | 0.728187 | 13.4916  | 0.08498  | 0        | 0.242662 | -5.99421 | -0.55458 | 5.439637 | 0.391879 | 0.307737 | 0.395545 |
| AC007319.1__antise | 82.4912  | 8.23628  | 96.5235  | 14.2207  | 20.317   | 989.714  | 101.372  | 5.33948  | 122.57   | -2.45153 | -0.29215 | 2.159379 | 0.460593 | 0.248723 | 0.473434 |
| AC007364.1__lincRN | 1.86792  | 2.83407  | 2.11391  | 25.6584  | 23.8734  | 95.9374  | 0.236879 | 0        | 0.107998 | -4.41567 | 4.30475  | 8.720416 | 0.191831 | 0.026091 | 0.178374 |
| AC007365.1__lincRN | 0        | 0        | 1.09786  | 0        | 4.11478  | 2.81941  | 0.754682 | 0        | 0        | -2.65903 | 0.540753 | 3.199787 | 0.24455  | 0.851277 | 0.292789 |
| AC007381.3__lincRN | 0.030008 | 0.106162 | 0.075097 | 0        | 13.7645  | 0.258378 | 0.117664 | 0.016397 | 0.032665 | -6.05257 | 0.341594 | 6.394163 | 0.416225 | 0.805836 | 0.418212 |
| AC007392.3__lincRN | 0.123883 | 0.014608 | 1.26031  | 5.63422  | 12.7842  | 31.5457  | 1.03124  | 1.91363  | 0.134932 | -5.15863 | -1.13865 | 4.019983 | 0.158642 | 0.593351 | 0.193324 |
| AC007403.2__lincRN | 0        | 0        | 0        | 0        | 12.2355  | 47.5782  | 1.81273  | 0        | 0        | #NUM!    | #NUM!    | 5.04424  | 0.297047 | 0.42265  | 0.318815 |
| AC007405.4__lincRN | 1.00441  | 1.76471  | 1.05689  | 2.05291  | 91.5996  | 167.196  | 0.847736 | 7.10146  | 0.845941 | -6.09123 | -1.20087 | 4.890362 | 0.214336 | 0.463071 | 0.220068 |
| AC007461.2__lincRN | 0        | 0        | 0        | 0        | 0        | 0        | 1.05535  | 0        | 0        | #DIV/0!  | #NUM!    | #NUM!    | #DIV/0!  | 0.42265  | 0.42265  |
| AC007464.1__lincRN | 11.4702  | 0.344553 | 1.85855  | 704.394  | 48.6409  | 471.812  | 8.99548  | 1.19922  | 2.73065  | -6.4851  | 0.081158 | 6.566254 | 0.166193 | 0.843515 | 0.167178 |
| AC007557.4__antise | 0        | 0        | 0.182986 | 0        | 1.70659  | 0        | 0        | 0        | 0        | -3.22131 | #DIV/0!  | #DIV/0!  | 0.487493 | 0.42265  | 0.42265  |
| AC007563.1__antise | 0        | 0        | 0.074806 | 0        | 0.079987 | 0.062684 | 0.064141 | 0        | 0.020352 | -0.93146 | -0.17567 | 0.755791 | 0.515678 | 0.933531 | 0.697186 |
| AC007563.3__lincRN | 0        | 0        | 5.96963  | 0        | 2.42111  | 3.46904  | 0        | 0        | 0        | 0.019337 | #DIV/0!  | #DIV/0!  | 0.986816 | 0.42265  | 0.196127 |
| AC007563.5__antise | 24.2075  | 10.6231  | 7.72899  | 21.044   | 60.4742  | 67.6526  | 1.57854  | 35.8055  | 40.3739  | -1.80941 | -0.86951 | 0.939903 | 0.211    | 0.567907 | 0.00918  |
| AC007679.3__antise | 0.818566 | 0.493552 | 1.28844  | 0        | 0.259634 | 2.20092  | 0        | 0.135566 | 0        | 0.079838 | 4.261754 | 4.181916 | 0.935229 | 0.092307 | 0.391071 |
| AC007682.1__lincRN | 0.036402 | 0.036375 | 2.34287  | 1376.95  | 995.889  | 989.714  | 1.52192  | 0.132912 | 0.049666 | -10.4429 | 0.503063 | 10.94599 | 0.0129   | 0.849825 | 0.012723 |
| AC007740.1__antise | 0.009781 | 0        | 0.107753 | 0.013012 | 1.37899  | 12.4737  | 1.21024  | 0        | 0        | -6.8823  | -3.36415 | 3.518156 | 0.36207  | 0.476577 | 0.420415 |
| AC007743.1__antise | 0.159433 | 0        | 0        | 0.832058 | 1.19972  | 6.41402  | 0.379179 | 0        | 0        | -5.72721 | -1.24993 | 4.477283 | 0.270693 | 0.42265  | 0.287984 |
| AC007773.2__antise | 0.150694 | 0.311111 | 0.863532 | 0.926769 | 3.54753  | 7.99202  | 2.50233  | 0.263623 | 0.203987 | -3.2336  | -1.16407 | 2.06953  | 0.182391 | 0.611307 | 0.3623   |
| AC007796.1__antise | 0.925179 | 12.9614  | 3.20756  | 3.83278  | 71.8827  | 640.316  | 0.993669 | 0.615415 | 0.730485 | -5.38845 | 2.869187 | 8.257636 | 0.369318 | 0.323506 | 0.359723 |
| AC007879.1__lincRN | 0        | 0        | 0        | 0        | 21.4949  | 105.531  | 0.985821 | 0        | 6.8584   | #NUM!    | #NUM!    | 4.017349 | 0.319035 | 0.34638  | 0.31866  |
| AC007879.4__lincRN | 0        | 0.242807 | 0.477996 | 0        | 0.07178  | 1.94407  | 0.531596 | 0        | 0        | -1.48371 | 0.439275 | 1.922986 | 0.493437 | 0.855314 | 0.575085 |
| AC007879.5__antise | 7.93707  | 8.45599  | 4.97283  | 9.85223  | 66.2681  | 1215.33  | 4.0613   | 6.2421   | 5.02143  | -5.91754 | 0.479438 | 6.396977 | 0.39485  | 0.218641 | 0.392007 |
| AC007880.1__lincRN | 0        | 0        | 0.822009 | 0.16184  | 13.2695  | 34.6355  | 1.96765  | 0.04994  | 0        | -5.86974 | -1.29541 | 4.574337 | 0.249076 | 0.676391 | 0.2837   |
| AC007966.1__antise | 1.29261  | 59.5786  | 0        | 0        | 6.43972  | 0        | 0        | 0        | 1.19727  | 3.24069  | 5.66794  | 2.427249 | 0.408781 | 0.421979 | 0.537909 |
| AC007970.1__antise | 6.62292  | 11.0544  | 27.0361  | 4.89505  | 71.8827  | 87.1176  | 3.49722  | 9.8487   | 5.45399  | -1.874   | 1.249982 | 3.123977 | 0.195351 | 0.314983 | 0.183223 |
| AC008063.3__lincRN | 0        | 0.277376 | 0        | 0        | 0.939536 | 0        | 0.456492 | 0        | 0.063327 | -1.76011 | -0.90617 | 0.85394  | 0.42265  | 0.739775 | 0.768439 |
| AC008069.1__lincRN | 0        | 0        | 0.529492 | 0        | 6.81829  | 15.6723  | 0        | 0        | 0        | -5.40857 | #DIV/0!  | #DIV/0!  | 0.236514 | 0.42265  | 0.240257 |
| AC008074.3__antise | 6.18307  | 2.13666  | 4.85337  | 1.98861  | 10.1956  | 16.2644  | 1.39451  | 5.27746  | 3.95853  | -1.11076 | 0.309385 | 1.420149 | 0.395358 | 0.746735 | 0.224512 |

|                    |          |          |          |          |          |          |          |          |          |          |          |          |          |          |          |
|--------------------|----------|----------|----------|----------|----------|----------|----------|----------|----------|----------|----------|----------|----------|----------|----------|
| AC008074.4__lincRN | 0        | 0        | 0        | 0        | 1.90809  | 3.19012  | 0.508333 | 0        | 0        | #NUM!    | #NUM!    | 3.326145 | 0.208156 | 0.42265  | 0.293683 |
| AC008079.9__antise | 0.002714 | 0.113064 | 0.043882 | 0.679748 | 1.38396  | 0.197183 | 0.693986 | 0.033353 | 0.093712 | -3.82382 | -2.36247 | 1.461348 | 0.162262 | 0.452645 | 0.386337 |
| AC008088.4__lincRN | 0        | 0.165616 | 0.120157 | 0        | 0.403237 | 0.208663 | 0.182493 | 0.043617 | 0.282166 | -1.09843 | -0.83074 | 0.267683 | 0.257442 | 0.529142 | 0.854051 |
| AC008268.1__lincRN | 0        | 0        | 0.671157 | 0        | 0.289157 | 3.95323  | 0.11195  | 0.062419 | 0.031073 | -2.66015 | 1.707922 | 4.368076 | 0.374208 | 0.588106 | 0.406984 |
| AC008268.2__pseud  | 0        | 0.069324 | 1.33969  | 0.194878 | 2.8087   | 3.56412  | 0.173352 | 1.00549  | 0        | -2.2207  | 0.257316 | 2.478017 | 0.157262 | 0.919144 | 0.221089 |
| AC008278.2__antise | 0.143478 | 0        | 0.857049 | 0        | 0        | 3.4458   | 0        | 0        | 0        | -1.78408 | #DIV/0!  | #DIV/0!  | 0.455484 | 0.335247 | 0.42265  |
| AC008278.3__antise | 0        | 0.310756 | 0.485192 | 0        | 0.727272 | 1.77324  | 0.191473 | 0        | 0        | -1.65148 | 2.055533 | 3.707011 | 0.273017 | 0.425202 | 0.307873 |
| AC008592.4__antise | 0.093571 | 0.261228 | 0.61667  | 0        | 6.32791  | 0.168724 | 1.27292  | 0.193245 | 0.492588 | -2.74145 | -1.0117  | 1.729757 | 0.475674 | 0.520116 | 0.582392 |
| AC008592.5__proce  | 0.410412 | 0.072406 | 0.888379 | 0.062839 | 8.20314  | 13.4916  | 0.555039 | 0        | 0.064878 | -3.98801 | 1.145288 | 5.133299 | 0.215451 | 0.483158 | 0.22476  |
| AC008738.1__pseud  | 11.1831  | 2.82578  | 3.93089  | 2.04842  | 0.989093 | 21.9652  | 9.40365  | 4.33035  | 5.63162  | -0.47892 | -0.11034 | 0.368587 | 0.799114 | 0.714647 | 0.821395 |
| AC008753.6__antise | 4.44291  | 4.17263  | 4.15185  | 6.17931  | 6.55471  | 4.83086  | 1.68685  | 4.01014  | 3.81731  | -0.46023 | 0.424294 | 0.884524 | 0.084344 | 0.324651 | 0.116616 |
| AC008940.1__lincRN | 0        | 0        | 0        | 0.057923 | 1.99672  | 6.42067  | 0.042892 | 0.047844 | 0        | #NUM!    | #NUM!    | 6.545438 | 0.2723   | 0.184717 | 0.278558 |
| AC009110.1__lincRN | 0        | 0        | 0        | 0        | 0        | 0        | 0        | 0        | 0        | #DIV/0!  | #DIV/0!  | #DIV/0!  | #DIV/0!  | #DIV/0!  | #DIV/0!  |
| AC009120.4__lincRN | 0        | 0.080128 | 1.07061  | 2.41279  | 100.521  | 118.169  | 1.63916  | 0.103168 | 1.57004  | -7.58601 | -1.5253  | 6.06071  | 0.176958 | 0.271746 | 0.182871 |
| AC009120.6__antise | 36.6396  | 39.044   | 25.4145  | 12.2587  | 11.2282  | 28.0384  | 20.2088  | 29.861   | 27.0769  | 0.972403 | 0.39008  | -0.58232 | 0.228161 | 0.26819  | 0.270614 |
| AC009133.14__antis | 0        | 0        | 0        | 1.60995  | 0        | 5.67939  | 1.31592  | 0        | 3.18877  | #NUM!    | #NUM!    | 0.69436  | 0.287077 | 0.246067 | 0.358942 |
| AC009133.20__antis | 18.0681  | 16.982   | 0        | 11.6006  | 6.86359  | 0.87238  | 4.98778  | 21.6065  | 0.665395 | 0.858087 | 0.36265  | -0.49544 | 0.246521 | 0.676177 | 0.716919 |
| AC009227.2__antise | 0        | 0.014846 | 0.224568 | 0.083667 | 1.54952  | 3.3512   | 0.209905 | 0        | 0        | -4.37984 | 0.189768 | 4.569608 | 0.213681 | 0.944641 | 0.253827 |
| AC009227.3__lincRN | 0        | 0        | 0        | 0        | 0        | 0        | 0        | 0        | 0        | #DIV/0!  | #DIV/0!  | #DIV/0!  | #DIV/0!  | #DIV/0!  | #DIV/0!  |
| AC009232.2__lincRN | 0.027721 | 0.021791 | 0.138824 | 0.172137 | 0.069273 | 0.070907 | 0.098945 | 0        | 0.080573 | -0.7297  | 0.069185 | 0.798888 | 0.570094 | 0.946154 | 0.242664 |
| AC009236.1__proce  | 0.734898 | 0.050513 | 1.49498  | 31.8494  | 46.8079  | 73.1973  | 1.68022  | 0.283345 | 0.799996 | -6.05727 | -0.27725 | 5.780018 | 0.05186  | 0.766792 | 0.056088 |
| AC009237.8__pseud  | 0.655122 | 0.147789 | 0.639514 | 0.235165 | 0.196042 | 4.55358  | 0.754092 | 1.4674   | 0.073511 | -1.78904 | -0.67    | 1.119036 | 0.480499 | 0.657998 | 0.668584 |
| AC009299.2__antise | 1.39758  | 0.949466 | 0.69684  | 1.44859  | 13.1014  | 14.7181  | 1.30675  | 0        | 0.769338 | -3.26534 | 0.552047 | 3.817389 | 0.183994 | 0.415862 | 0.179647 |
| AC009312.1__antise | 0        | 0        | 0        | 0        | 5.79481  | 3.32733  | 1.29473  | 0.067456 | 0        | #NUM!    | #NUM!    | 2.743448 | 0.211828 | 0.393392 | 0.336174 |
| AC009410.1__lincRN | 0        | 5.5574   | 188.107  | 1.78241  | 152.22   | 32.8839  | 0.063773 | 0        | 0        | 0.051398 | 11.56832 | 11.51692 | 0.981676 | 0.406048 | 0.307426 |
| AC009478.1__lincRN | 0        | 0        | 0.843282 | 0        | 5.89327  | 217.355  | 0.97468  | 0        | 0        | -8.04842 | -0.20891 | 7.839505 | 0.407154 | 0.941139 | 0.409808 |
| AC009492.1__lincRN | 0        | 0.058799 | 0.605702 | 0.049709 | 35.3643  | 52.1068  | 0.146717 | 0        | 0.081463 | -7.04121 | 1.542096 | 8.583307 | 0.196894 | 0.539932 | 0.198841 |
| AC009495.4__lincRN | 13.0412  | 21.4712  | 28.4284  | 15.1217  | 3.63872  | 56.3324  | 17.8426  | 18.7786  | 22.2174  | -0.25468 | 0.097233 | 0.351912 | 0.788553 | 0.714629 | 0.749232 |
| AC009498.1__lincRN | 0        | 0.248926 | 0        | 0        | 0        | 46.0635  | 0        | 0        | 0        | -7.53176 | #DIV/0!  | #DIV/0!  | 0.425778 | 0.42265  | 0.42265  |
| AC009499.1__lincRN | 0        | 0.145426 | 7.31436  | 1.31939  | 19.9212  | 455.045  | 120.843  | 0        | 106.09   | -5.99655 | -4.92699 | 1.06956  | 0.396039 | 0.188133 | 0.610271 |
| AC009501.4__antise | 0        | 0        | 0        | 0        | 0        | 30.5084  | 0        | 0        | 0        | #NUM!    | #DIV/0!  | #DIV/0!  | 0.42265  | #DIV/0!  | 0.42265  |
| AC009502.4__lincRN | 0        | 0        | 0        | 0        | 1.45311  | 34.6728  | 1.07243  | 0        | 0.818131 | #NUM!    | #NUM!    | 4.256148 | 0.398981 | 0.190791 | 0.416987 |
| AC009505.4__lincRN | 0        | 0        | 0        | 0        | 0        | 1.4905   | 0        | 0        | 0        | #NUM!    | #DIV/0!  | #DIV/0!  | 0.42265  | #DIV/0!  | 0.42265  |
| AC009506.1__antise | 0        | 0        | 0        | 0        | 0        | 1.5275   | 0        | 0        | 0        | #NUM!    | #DIV/0!  | #DIV/0!  | 0.42265  | #DIV/0!  | 0.42265  |
| AC009948.5__antise | 24.5394  | 14.8458  | 12.0597  | 5.70419  | 9.69533  | 28.6779  | 11.9413  | 13.5978  | 21.7853  | 0.222988 | 0.120444 | -0.10254 | 0.834108 | 0.850981 | 0.814053 |

|                    |          |          |          |          |          |          |          |          |          |          |          |          |          |          |          |
|--------------------|----------|----------|----------|----------|----------|----------|----------|----------|----------|----------|----------|----------|----------|----------|----------|
| AC009950.2__antise | 1.52388  | 2.19636  | 2.13396  | 1.42084  | 29.6113  | 786.388  | 0.952573 | 2.656    | 1.25355  | -7.12546 | 0.267886 | 7.393348 | 0.402908 | 0.500094 | 0.402836 |
| AC009955.8__antise | 0        | 0        | 0        | 0        | 0        | 1.26062  | 0.205533 | 0        | 0        | #NUM!    | #NUM!    | 2.616692 | 0.42265  | 0.42265  | 0.523079 |
| AC009965.2__lincRN | 0        | 0        | 0.391565 | 0        | 5.99339  | 4.11632  | 0        | 0        | 0        | -4.69035 | #DIV/0!  | #DIV/0!  | 0.204881 | 0.42265  | 0.197223 |
| AC010096.1__lincRN | 0.018734 | 0.004208 | 0.164264 | 0.003683 | 0.176475 | 3.59481  | 0.635291 | 0.007795 | 0.065665 | -4.33377 | -1.92065 | 2.413115 | 0.396956 | 0.517756 | 0.506773 |
| AC010105.1__lincRN | 0        | 0        | 0        | 0        | 1.1828   | 19.9191  | 0        | 0        | 0        | #NUM!    | #DIV/0!  | #DIV/0!  | 0.389442 | #DIV/0!  | 0.389442 |
| AC010127.3__antise | 7.74015  | 0.296683 | 0.823439 | 0.174222 | 121.856  | 637.067  | 0.74053  | 1.65953  | 0.273319 | -6.42079 | 1.728687 | 8.149476 | 0.331349 | 0.500576 | 0.326087 |
| AC010127.5__proce  | 0        | 0        | 0        | 0        | 3.19856  | 6.27662  | 0        | 0        | 0        | #NUM!    | #DIV/0!  | #DIV/0!  | 0.223451 | #DIV/0!  | 0.223451 |
| AC010136.2__antise | 0.301401 | 0        | 0.180237 | 0        | 2.27172  | 13.6092  | 0.692232 | 0.065298 | 0        | -5.0432  | -0.65335 | 4.389848 | 0.347374 | 0.634089 | 0.367479 |
| AC010145.4__lincRN | 0.322588 | 0.162136 | 2.29032  | 0.335749 | 1333.84  | 22.8765  | 0.989496 | 0.21412  | 0.255729 | -8.93375 | 0.92719  | 9.86094  | 0.413802 | 0.645325 | 0.413224 |
| AC010148.1__proce  | 0.215914 | 2.69656  | 1.26494  | 216.437  | 6.49381  | 12.5965  | 0.545566 | 0        | 2.39296  | -5.81714 | 0.507517 | 6.324658 | 0.383194 | 0.756836 | 0.37897  |
| AC010492.2__pseud  | 322.799  | 644.991  | 13.8012  | 162.215  | 5.27548  | 4.34109  | 3.40774  | 3.08276  | 9.71607  | 2.514127 | 5.920472 | 3.406344 | 0.291247 | 0.222631 | 0.434597 |
| AC010524.2__antise | 0.175799 | 0.116505 | 1.40509  | 2.68742  | 1.41575  | 59.6368  | 1.01882  | 0.071704 | 0.07138  | -5.2308  | 0.546831 | 5.777636 | 0.38559  | 0.804132 | 0.393841 |
| AC010729.2__lincRN | 0        | 0        | 0.122102 | 0        | 93.2108  | 0.383094 | 0.085383 | 0        | 0.113771 | -9.58218 | -0.7058  | 8.876388 | 0.421035 | 0.481446 | 0.421513 |
| AC010729.3__lincRN | 0        | 0        | 0        | 0.267832 | 0        | 1.10216  | 0        | 0        | 0        | #NUM!    | #DIV/0!  | #DIV/0!  | 0.302645 | #DIV/0!  | 0.302645 |
| AC010731.2__antise | 0.111383 | 0.091938 | 0.055769 | 0.074059 | 0.0596   | 0.021349 | 0.021855 | 0.133995 | 0.04854  | 0.741108 | 0.342128 | -0.39898 | 0.001733 | 0.681573 | 0.699457 |
| AC010731.3__antise | 0        | 0        | 1.28353  | 0        | 0        | 3.86677  | 0        | 0        | 0        | -1.59101 | #DIV/0!  | #DIV/0!  | 0.42265  | 0.42265  | 0.42265  |
| AC010731.4__lincRN | 0        | 0        | 0        | 0        | 0        | 15.7105  | 0.133073 | 0        | 0.098504 | #NUM!    | #NUM!    | 6.084096 | 0.42265  | 0.192452 | 0.427592 |
| AC010733.4__lincRN | 7.02194  | 6.50432  | 8.16511  | 3.28685  | 23.9429  | 58.0879  | 3.61737  | 5.89388  | 4.36062  | -1.97572 | 0.644959 | 2.620682 | 0.307059 | 0.121979 | 0.272229 |
| AC010744.1__lincRN | 0        | 0        | 0        | 0        | 0        | 0        | 0        | 0        | 0        | #DIV/0!  | #DIV/0!  | #DIV/0!  | #DIV/0!  | #DIV/0!  | #DIV/0!  |
| AC010745.2__lincRN | 0        | 0.094774 | 0.441206 | 0.158723 | 0.552579 | 1.28591  | 0.195807 | 0        | 0.21736  | -1.89774 | 0.375454 | 2.273191 | 0.133667 | 0.772837 | 0.24012  |
| AC010745.4__lincRN | 0        | 0        | 0.140217 | 0        | 1.7478   | 0        | 0.091197 | 0        | 0        | -3.63981 | 0.620609 | 4.260416 | 0.470668 | 0.830796 | 0.453518 |
| AC010761.6__antise | 2.99185  | 3.37863  | 3.75175  | 2.32381  | 1.58259  | 3.83316  | 3.49724  | 3.23947  | 2.70598  | 0.387204 | 0.100257 | -0.28695 | 0.28277  | 0.664614 | 0.576569 |
| AC010880.1__lincRN | 0        | 0        | 0.831592 | 0        | 32.5583  | 18.4534  | 0.83399  | 0        | 0        | -5.93881 | -0.00415 | 5.934654 | 0.217435 | 0.998824 | 0.226091 |
| AC010883.5__antise | 0.27903  | 0.197441 | 1.11579  | 0.296117 | 0.258051 | 4.3171   | 0.370421 | 0.426602 | 0.121393 | -1.61322 | 0.793857 | 2.407078 | 0.408752 | 0.620276 | 0.456591 |
| AC010884.1__antise | 9.4663   | 6.96679  | 9.96983  | 3.99914  | 7.85273  | 32.271   | 5.57479  | 6.45919  | 6.88287  | -0.74083 | 0.481026 | 1.221855 | 0.554777 | 0.134385 | 0.428748 |
| AC010890.1__antise | 0.25756  | 0.506842 | 0        | 0        | 82.6896  | 3.62213  | 0.248687 | 0.185082 | 0        | -6.81908 | 0.817405 | 7.636486 | 0.399599 | 0.406954 | 0.399624 |
| AC010967.2__lincRN | 5.62839  | 0.630079 | 0.991038 | 0        | 12.4889  | 476.842  | 0        | 9.538    | 0        | -6.07678 | -0.3958  | 5.68098  | 0.415313 | 0.875159 | 0.419088 |
| AC010976.2__antise | 13.9229  | 4.98173  | 15.4522  | 8.76723  | 5.28691  | 48.3233  | 8.1559   | 10.3215  | 10.2081  | -0.86043 | 0.260275 | 1.120703 | 0.513809 | 0.653449 | 0.49411  |
| AC010980.2__pseud  | 0.092681 | 0        | 1.04727  | 0.269123 | 5.10683  | 0.599295 | 0.645747 | 0.044441 | 0.056344 | -2.39003 | 0.610696 | 3.000723 | 0.455761 | 0.799997 | 0.408697 |
| AC010982.1__lincRN | 0        | 0.722346 | 1.38142  | 2.06426  | 1.87254  | 19.9191  | 0.729884 | 0        | 0        | -3.5033  | 1.527235 | 5.030535 | 0.327975 | 0.539176 | 0.33412  |
| AC010987.5__lincRN | 0        | 0        | 0.439507 | 5.3467   | 100.521  | 12.0599  | 0.599974 | 0        | 0        | -8.0678  | -0.44901 | 7.618786 | 0.330596 | 0.875431 | 0.331652 |
| AC010987.6__lincRN | 0.43239  | 0        | 0.651088 | 0        | 5.96595  | 4.83676  | 1.28301  | 0        | 0        | -3.31765 | -0.24386 | 3.073789 | 0.231382 | 0.892457 | 0.294157 |
| AC011286.1__lincRN | 0.066925 | 0        | 0.553418 | 0        | 1.44681  | 42.1635  | 0.809265 | 0        | 0        | -6.13546 | -0.38355 | 5.751913 | 0.403865 | 0.8822   | 0.414372 |
| AC011306.2__lincRN | 0.012899 | 0.027089 | 1.37201  | 0.017198 | 1.79494  | 398.421  | 0.098401 | 0.045918 | 0.065114 | -8.14696 | 2.753181 | 10.90014 | 0.420079 | 0.469928 | 0.420238 |
| AC011516.2__lincRN | 0        | 0        | 0.187798 | 0.03821  | 1.52485  | 2.63854  | 0.04237  | 0        | 0.078401 | -4.48369 | 0.636915 | 5.1206   | 0.197212 | 0.670134 | 0.209333 |

|                    |          |          |          |          |          |          |          |          |          |          |          |          |          |          |          |
|--------------------|----------|----------|----------|----------|----------|----------|----------|----------|----------|----------|----------|----------|----------|----------|----------|
| AC011518.2__lincRN | 0        | 0        | 0        | 0        | 1.22026  | 13.0265  | 0        | 0        | 0.213492 | #NUM!    | #NUM!    | 6.060308 | 0.371319 | 0.42265  | 0.370513 |
| AC011523.2__antise | 0.092038 | 0        | 0.833035 | 0        | 1.60689  | 27.2612  | 1.90775  | 1.18838  | 0        | -4.96376 | -1.74283 | 3.220938 | 0.390685 | 0.460747 | 0.455585 |
| AC011524.1__lincRN | 0        | 0        | 1.44258  | 0        | 10.7387  | 13.683   | 1.87462  | 0        | 0        | -4.08144 | -0.37795 | 3.703494 | 0.185241 | 0.894548 | 0.255906 |
| AC011525.2__lincRN | 0.010096 | 0.059518 | 0.085986 | 0.073989 | 4.06837  | 0.194195 | 0.208277 | 0.033164 | 0.082411 | -4.80063 | -1.05749 | 3.743144 | 0.398159 | 0.514197 | 0.426407 |
| AC011526.1__lincRN | 0.587354 | 0.246518 | 0.486053 | 6.67753  | 17.7302  | 9.85813  | 1.0708   | 0.392281 | 0.401172 | -4.69824 | -0.49814 | 4.200102 | 0.083354 | 0.386228 | 0.088785 |
| AC011747.3__lincRN | 0.031298 | 0.258433 | 1.9349   | 14.7485  | 4.91726  | 11.7262  | 1.08368  | 4.3944   | 1.13321  | -3.81876 | -1.57137 | 2.247391 | 0.078804 | 0.416765 | 0.172891 |
| AC011747.7__antise | 32.486   | 8.21895  | 23.7385  | 8.20051  | 2.79158  | 4.77778  | 15.5428  | 31.1893  | 16.0018  | 2.030863 | 0.038788 | -1.99207 | 0.101751 | 0.966625 | 0.136632 |
| AC011752.1__lincRN | 0.127437 | 0.426932 | 1.59184  | 12.6718  | 41.8607  | 637.067  | 1.95963  | 0.206929 | 0.379694 | -8.332   | -0.24659 | 8.085417 | 0.375057 | 0.895389 | 0.376585 |
| AC011754.1__sense  | 0.347844 | 0        | 36.6829  | 60.747   | 0.592124 | 4.92906  | 0.386653 | 74.5391  | 0.190909 | -0.83959 | -1.02041 | -0.18082 | 0.752635 | 0.735049 | 0.946546 |
| AC011897.2__lincRN | 0        | 0        | 1.1569   | 0        | 0        | 4.84484  | 0        | 0        | 0        | -2.06618 | #DIV/0!  | #DIV/0!  | 0.42265  | 0.42265  | 0.42265  |
| AC011901.2__lincRN | 0        | 0        | 0        | 0        | 2.72314  | 0        | 0.791648 | 0        | 0        | #NUM!    | #NUM!    | 1.78234  | 0.42265  | 0.42265  | 0.606772 |
| AC011995.1__lincRN | 0        | 0        | 0        | 0        | 1.2737   | 126.118  | 0        | 0.070243 | 0        | #NUM!    | #NUM!    | 10.82464 | 0.416849 | 0.42265  | 0.417167 |
| AC011995.3__lincRN | 0        | 0        | 0        | 0        | 0        | 0.200576 | 0.498999 | 0        | 0        | #NUM!    | #NUM!    | -1.31489 | 0.42265  | 0.42265  | 0.679632 |
| AC012065.7__lincRN | 0.440976 | 0        | 0.130418 | 3.08504  | 0.11579  | 8.93339  | 1.01976  | 0.142283 | 0.165308 | -4.40845 | -1.21599 | 3.19246  | 0.273755 | 0.268969 | 0.30736  |
| AC012075.2__lincRN | 0        | 0        | 0.147741 | 0        | 0        | 0.276573 | 0        | 0        | 0        | -0.90459 | #DIV/0!  | #DIV/0!  | 0.42265  | 0.42265  | 0.42265  |
| AC012307.3__proce  | 38.9098  | 30.8538  | 25.5193  | 14.2651  | 71.8827  | 19.6241  | 17.2649  | 34.9997  | 30.9942  | -0.15067 | 0.194615 | 0.345282 | 0.874421 | 0.694291 | 0.664242 |
| AC012309.5__lincRN | 0.071027 | 0.310803 | 0.254302 | 1.39334  | 1.12737  | 51.6202  | 4.41772  | 0.013889 | 0.365451 | -6.41125 | -2.91475 | 3.496497 | 0.398884 | 0.448788 | 0.44527  |
| AC012322.1__lincRN | 0        | 0        | 3.52325  | 0        | 7.07249  | 103.801  | 0.731949 | 0        | 0        | -4.97586 | 2.267092 | 7.242956 | 0.383461 | 0.552155 | 0.388815 |
| AC012354.6__lincRN | 0.150087 | 0        | 0.663572 | 0.073186 | 1.35143  | 3.5123   | 0.438663 | 0.096301 | 0.202589 | -2.60111 | 0.141677 | 2.742791 | 0.245217 | 0.920445 | 0.318678 |
| AC012360.6__antise | 0        | 0.051703 | 0.648761 | 0        | 0.416871 | 0.235764 | 0        | 0        | 0        | 0.102035 | #DIV/0!  | #DIV/0!  | 0.94991  | 0.378608 | 0.213235 |
| AC012361.1__lincRN | 0        | 0        | 0        | 0        | 0.109938 | 0        | 0.060569 | 0        | 0        | #NUM!    | #NUM!    | 0.860031 | 0.42265  | 0.42265  | 0.772918 |
| AC012363.4__antise | 3.83168  | 3.59145  | 16.6122  | 3.48177  | 3.54456  | 17.7696  | 1.9781   | 3.10324  | 14.4666  | -0.04495 | 0.29814  | 0.343087 | 0.637094 | 0.099512 | 0.171222 |
| AC012445.1__lincRN | 0        | 0        | 0.240316 | 0        | 0        | 0        | 0        | 0.065298 | 0        | #DIV/0!  | 1.879831 | #NUM!    | 0.42265  | 0.594237 | 0.42265  |
| AC012451.1__lincRN | 0.13091  | 0.464054 | 0        | 0        | 0        | 0        | 0        | 0        | 0        | #DIV/0!  | #DIV/0!  | #DIV/0!  | 0.287584 | 0.287584 | #DIV/0!  |
| AC012456.3__antise | 0        | 0.022601 | 0.095878 | 0        | 5.66733  | 0.164693 | 0.187687 | 0.020926 | 0.041681 | -5.6213  | -1.079   | 4.542305 | 0.415655 | 0.61045  | 0.429713 |
| AC012457.2__antise | 0        | 0        | 0.344578 | 0        | 3.61844  | 4.53351  | 0.54111  | 0        | 0        | -4.56424 | -0.65109 | 3.913151 | 0.185675 | 0.823124 | 0.245733 |
| AC012462.2__lincRN | 0.193841 | 0        | 0.515324 | 0        | 12.4507  | 2.83048  | 2.38465  | 0        | 0        | -4.42949 | -1.74958 | 2.679907 | 0.335748 | 0.570185 | 0.426767 |
| AC012494.1__lincRN | 0        | 0        | 3.52164  | 0        | 5.72409  | 20.1469  | 1.16053  | 5.61528  | 0        | -2.87702 | -0.94415 | 1.93287  | 0.266146 | 0.720793 | 0.453702 |
| AC012501.2__sense  | 8.50126  | 0        | 4.05579  | 53.3774  | 39.9278  | 92.9292  | 1.66293  | 1.97301  | 8.14136  | -3.89055 | 0.092489 | 3.983039 | 0.06522  | 0.945143 | 0.052644 |
| AC012506.1__lincRN | 0        | 0        | 0        | 0        | 3.67733  | 167.196  | 0        | 0        | 0        | #NUM!    | #DIV/0!  | #DIV/0!  | 0.410094 | #DIV/0!  | 0.410094 |
| AC012506.2__lincRN | 0        | 0        | 0.111837 | 0        | 0.474464 | 2.31372  | 0        | 0        | 0        | -4.63986 | #DIV/0!  | #DIV/0!  | 0.313987 | 0.42265  | 0.318438 |
| AC012506.3__lincRN | 0.071739 | 0        | 1.7025   | 0        | 33.3774  | 58.607   | 0        | 0        | 0        | -5.69612 | #DIV/0!  | #DIV/0!  | 0.210519 | 0.398855 | 0.212585 |
| AC012506.4__lincRN | 0        | 0        | 0.279969 | 0        | 3.05907  | 0        | 0        | 0        | 0        | -3.44975 | #DIV/0!  | #DIV/0!  | 0.477672 | 0.42265  | 0.42265  |
| AC012531.23__lincR | 0        | 0        | 0.118629 | 0.865815 | 0.209563 | 1.53887  | 0.501942 | 0        | 0.085722 | -4.46187 | -2.30854 | 2.153332 | 0.140561 | 0.461656 | 0.226465 |
| AC012593.1__lincRN | 0        | 0        | 3.40567  | 5.69312  | 363.264  | 69.5374  | 0.348285 | 0        | 0        | -7.00848 | 3.289598 | 10.29807 | 0.319758 | 0.484382 | 0.316126 |

|                    |          |          |          |          |          |          |          |          |          |          |          |          |          |          |          |
|--------------------|----------|----------|----------|----------|----------|----------|----------|----------|----------|----------|----------|----------|----------|----------|----------|
| AC012668.1__lincRN | 0        | 0        | 0        | 0        | 0        | 6.92249  | 0        | 0        | 0        | #NUM!    | #DIV/0!  | #DIV/0!  | 0.42265  | #DIV/0!  | 0.42265  |
| AC012668.3__lincRN | 0        | 0        | 0        | 0        | 2.74025  | 36.5083  | 0        | 0        | 0        | #NUM!    | #DIV/0!  | #DIV/0!  | 0.381056 | #DIV/0!  | 0.381056 |
| AC013248.2__lincRN | 0        | 0        | 0        | 0        | 0        | 0        | 0        | 0        | 0        | #DIV/0!  | #DIV/0!  | #DIV/0!  | #DIV/0!  | #DIV/0!  | #DIV/0!  |
| AC013268.5__lincRN | 7.04071  | 13.6062  | 21.001   | 7.08935  | 5.5527   | 6.16492  | 16.2292  | 6.04867  | 4.92465  | 1.146977 | 0.614504 | -0.53247 | 0.218816 | 0.582994 | 0.475241 |
| AC013269.3__antise | 0.00458  | 0.048618 | 0.137372 | 0        | 0.182642 | 0        | 0.174622 | 0        | 0        | 0.061305 | 0.126088 | 0.064783 | 0.976156 | 0.958883 | 0.981676 |
| AC013275.2__antise | 0.194218 | 0.08809  | 0.639921 | 0.099211 | 13.0924  | 1.62914  | 1.41109  | 0.048981 | 0.048788 | -4.00635 | -0.71026 | 3.296089 | 0.384743 | 0.749752 | 0.417938 |
| AC013401.1__lincRN | 0        | 0        | 0        | 0        | 0        | 3.75912  | 0.25709  | 0        | 0        | #NUM!    | #NUM!    | 3.87005  | 0.42265  | 0.42265  | 0.463389 |
| AC013402.2__lincRN | 0.035608 | 0.051622 | 1.2153   | 5.40114  | 21.2284  | 24.3389  | 1.4553   | 0        | 0.899839 | -5.29022 | -0.8545  | 4.43572  | 0.098597 | 0.582387 | 0.119291 |
| AC013402.3__lincRN | 0        | 0        | 0        | 0        | 0        | 0.168098 | 0        | 0        | 0        | #NUM!    | #DIV/0!  | #DIV/0!  | 0.42265  | #DIV/0!  | 0.42265  |
| AC013402.4__lincRN | 0        | 0        | 0        | 0        | 0        | 0        | 0        | 0        | 0        | #DIV/0!  | #DIV/0!  | #DIV/0!  | #DIV/0!  | #DIV/0!  | #DIV/0!  |
| AC013448.1__lincRN | 1.90702  | 0        | 0        | 0        | 1.73225  | 4.10086  | 0.211488 | 0        | 0.32866  | -1.61295 | 1.819893 | 3.432839 | 0.531956 | 0.543068 | 0.264758 |
| AC013460.1__proce  | 0.094198 | 0.031737 | 0.243304 | 0        | 0.952338 | 2.52977  | 0.105566 | 0.029421 | 0        | -3.23733 | 1.451738 | 4.68907  | 0.271391 | 0.444759 | 0.282928 |
| AC013472.3__proce  | 3.79114  | 0.955826 | 0.481944 | 6.07045  | 4.69814  | 148.178  | 1.38922  | 0        | 3.24815  | -4.92589 | 0.173203 | 5.099091 | 0.399375 | 0.909795 | 0.385928 |
| AC013472.4__antise | 2.39426  | 4.56843  | 3.38416  | 2.84611  | 2.69816  | 13.5083  | 1.34761  | 1.94425  | 4.61954  | -0.88079 | 0.387187 | 1.267981 | 0.512268 | 0.543989 | 0.288901 |
| AC013480.2__antise | 0        | 0        | 0        | 0        | 0        | 3.62514  | 1.12174  | 0        | 0        | #NUM!    | #NUM!    | 1.692298 | 0.42265  | 0.42265  | 0.619119 |
| AC013727.1__lincRN | 0        | 0        | 0        | 0        | 2.62689  | 7.37237  | 0        | 0        | 0        | #NUM!    | #DIV/0!  | #DIV/0!  | 0.262358 | #DIV/0!  | 0.262358 |
| AC013733.3__antise | 0        | 0        | 1.0768   | 0        | 1.97252  | 23.6573  | 0.331354 | 0        | 0        | -4.573   | 1.700305 | 6.273306 | 0.374597 | 0.61799  | 0.384792 |
| AC013733.4__lincRN | 0        | 0        | 0.033171 | 0        | 13.2645  | 0        | 0.064827 | 0        | 0.071969 | -8.64342 | -2.04403 | 6.599396 | 0.424095 | 0.208103 | 0.428619 |
| AC015691.13__antis | 0.258497 | 0.076232 | 0.723436 | 0        | 3.75958  | 13.9801  | 0.284013 | 0.070385 | 0.210205 | -4.06734 | 0.906256 | 4.9736   | 0.300133 | 0.445497 | 0.304546 |
| AC015818.3__pseud  | 0        | 0.005014 | 0.057474 | 0.107376 | 0.50911  | 0.099766 | 0.188491 | 0.027893 | 0.027785 | -3.51882 | -1.96623 | 1.552588 | 0.270115 | 0.454195 | 0.447466 |
| AC015849.16__lincR | 0.04594  | 0.030953 | 0.105199 | 0.218512 | 2.61335  | 2.1445   | 0.045115 | 0.057471 | 0.057262 | -4.77236 | 0.187962 | 4.960317 | 0.159958 | 0.765609 | 0.158454 |
| AC015849.2__antise | 23.253   | 0.923326 | 3.96875  | 0.973095 | 6.98811  | 5.06769  | 0.304235 | 12.7575  | 3.73287  | 1.111168 | 0.744885 | -0.36628 | 0.622467 | 0.746211 | 0.635178 |
| AC015969.3__antise | 0        | 0        | 0.241537 | 0        | 0        | 0        | 0.817563 | 0.023955 | 0        | #DIV/0!  | -1.80075 | #NUM!    | 0.42265  | 0.593825 | 0.405988 |
| AC015971.2__antise | 1.4004   | 0        | 0        | 43.192   | 12.8537  | 171.952  | 1.64022  | 0        | 0        | -7.34704 | -0.22805 | 7.118986 | 0.262636 | 0.42265  | 0.263182 |
| AC015977.6__antise | 0        | 0        | 0        | 0        | 4.06877  | 1501.29  | 0.127946 | 0        | 0        | #NUM!    | #NUM!    | 13.52228 | 0.421087 | 0.42265  | 0.421136 |
| AC016582.2__lincRN | 0.32255  | 0.10867  | 0.565591 | 0.413557 | 5.36611  | 23.1152  | 1.67619  | 0.446544 | 1.89699  | -4.85735 | -2.0117  | 2.845645 | 0.304373 | 0.095008 | 0.34174  |
| AC016629.8__antise | 3.37886  | 4.16462  | 26.9562  | 8.82744  | 55.8989  | 7.38802  | 2.17784  | 3.92038  | 30.0016  | -1.0637  | -0.06541 | 0.998295 | 0.609262 | 0.718579 | 0.635679 |
| AC016682.1__lincRN | 1.34693  | 0.078429 | 1.06194  | 0        | 29.883   | 21.8751  | 0.064423 | 0        | 0        | -4.37913 | 5.270856 | 9.649989 | 0.218017 | 0.160829 | 0.194109 |
| AC016683.6__proce  | 4.82835  | 29.0323  | 32.688   | 22.6121  | 7.53834  | 43.8099  | 2.15804  | 27.1399  | 11.3596  | -0.15234 | 0.710886 | 0.863229 | 0.857516 | 0.307248 | 0.553649 |
| AC016700.5__lincRN | 0        | 0        | 1.09486  | 0        | 1.93588  | 0.958404 | 0.279318 | 0        | 0        | -1.40246 | 1.970766 | 3.373226 | 0.464674 | 0.583289 | 0.306854 |
| AC016710.1__lincRN | 0        | 0        | 0        | 0        | 1.09469  | 0        | 0        | 0        | 0        | #NUM!    | #DIV/0!  | #DIV/0!  | 0.42265  | #DIV/0!  | 0.42265  |
| AC016722.3__antise | 0        | 0.25935  | 0.054788 | 0        | 0        | 2.30296  | 0.694203 | 0        | 0        | -2.87402 | -1.14396 | 1.73006  | 0.492618 | 0.704705 | 0.613848 |
| AC016722.4__antise | 0        | 0        | 0        | 1.17017  | 12.7368  | 1.81695  | 0.938005 | 0        | 0        | #NUM!    | #NUM!    | 4.067222 | 0.29729  | 0.42265  | 0.33659  |
| AC016725.4__antise | 7.6395   | 10.474   | 6.57796  | 8.65765  | 166.167  | 476.842  | 5.39454  | 7.39606  | 7.16489  | -4.72205 | 0.307226 | 5.029277 | 0.269262 | 0.290639 | 0.26438  |
| AC016730.1__lincRN | 0        | 0        | 0        | 0        | 0        | 345.829  | 0        | 0        | 0        | #NUM!    | #DIV/0!  | #DIV/0!  | 0.42265  | #DIV/0!  | 0.42265  |



|                    |          |          |          |          |          |          |          |          |          |          |          |          |          |          |          |
|--------------------|----------|----------|----------|----------|----------|----------|----------|----------|----------|----------|----------|----------|----------|----------|----------|
| AC016735.3__lincRN | 0        | 0        | 0.715464 | 0        | 4.41841  | 2.05853  | 0.382058 | 0        | 0        | -3.17836 | 0.905088 | 4.083449 | 0.279695 | 0.762673 | 0.280298 |
| AC016739.2__pseud  | 96.2102  | 53.1034  | 72.597   | 61.1378  | 74.6818  | 85.7491  | 33.5799  | 35.1281  | 62.5157  | 0.002224 | 0.75795  | 0.755726 | 0.995434 | 0.205902 | 0.025284 |
| AC016751.2__lincRN | 0        | 1.70424  | 0        | 2.60619  | 0        | 2.73135  | 0        | 0        | 0        | -1.64705 | #DIV/0!  | #DIV/0!  | 0.493568 | 0.42265  | 0.183728 |
| AC016751.3__antise | 0        | 0.605837 | 0        | 0        | 0        | 2.28669  | 0        | 0        | 0        | -1.91626 | #DIV/0!  | #DIV/0!  | 0.589767 | 0.42265  | 0.42265  |
| AC016768.1__lincRN | 0.308341 | 0        | 1.90142  | 0        | 9.29166  | 46.083   | 2.08791  | 0.077538 | 0.254894 | -4.64726 | -0.13132 | 4.515943 | 0.320147 | 0.949878 | 0.346613 |
| AC016903.1__lincRN | 0        | 0        | 0.313164 | 0        | 2.01005  | 46.2304  | 0        | 0        | 0        | -7.26718 | #DIV/0!  | #DIV/0!  | 0.397953 | 0.42265  | 0.398116 |
| AC016903.2__lincRN | 0        | 0        | 0        | 0        | 0        | 5.00452  | 0        | 0        | 0        | #NUM!    | #DIV/0!  | #DIV/0!  | 0.42265  | #DIV/0!  | 0.42265  |
| AC016909.1__antise | 0.018119 | 0        | 0.453307 | 0        | 1.04881  | 5.65768  | 0.153234 | 0.059367 | 0        | -3.83045 | 1.148882 | 4.979336 | 0.321945 | 0.686544 | 0.347456 |
| AC016910.1__antise | 8.7399   | 86.8896  | 1.14963  | 6.67753  | 3.46864  | 17.0612  | 3.27374  | 9.98079  | 12.279   | 1.830698 | 1.922303 | 0.091605 | 0.527165 | 0.471981 | 0.889772 |
| AC016995.3__lincRN | 0        | 0.09306  | 1.23512  | 0        | 52.5571  | 30.5084  | 1.786    | 0        | 0.25137  | -5.96673 | -0.61726 | 5.349469 | 0.214507 | 0.7994   | 0.228925 |
| AC017002.4__lincRN | 0        | 0        | 0.516066 | 0        | 0        | 1.56961  | 0.482706 | 0        | 0.209668 | -1.60478 | -0.424   | 1.180783 | 0.42265  | 0.821961 | 0.649031 |
| AC017048.1__lincRN | 1.8812   | 0        | 0.869964 | 0        | 0        | 4.2537   | 0        | 1.31951  | 0        | -0.62868 | 1.06004  | 1.688716 | 0.77593  | 0.663588 | 0.619626 |
| AC017048.2__lincRN | 5.49379  | 0        | 0        | 0        | 4.19506  | 3.29521  | 0        | 1.41492  | 0        | -0.44722 | 1.957081 | 2.404297 | 0.849474 | 0.584892 | 0.186422 |
| AC017048.3__lincRN | 4.57807  | 0.534747 | 0.477749 | 0.583826 | 1.24923  | 0.331352 | 0.397429 | 1.65151  | 1.6013   | 1.369022 | 0.615003 | -0.75402 | 0.512819 | 0.749425 | 0.362253 |
| AC017048.4__lincRN | 0        | 0        | 1.89908  | 0        | 0        | 2.68884  | 0        | 0        | 0        | -0.50168 | #DIV/0!  | #DIV/0!  | 0.42265  | 0.42265  | 0.42265  |
| AC017053.1__lincRN | 0        | 0        | 0        | 0        | 0        | 43.9686  | 0        | 0        | 0        | #NUM!    | #DIV/0!  | #DIV/0!  | 0.42265  | #DIV/0!  | 0.42265  |
| AC017074.1__lincRN | 0        | 0        | 0.402522 | 0        | 1.53319  | 0        | 0        | 0        | 0        | -1.9294  | #DIV/0!  | #DIV/0!  | 0.588183 | 0.42265  | 0.42265  |
| AC017074.2__lincRN | 1.29614  | 4.02598  | 2.27518  | 10.1716  | 5.44142  | 284.403  | 1.77881  | 1.49391  | 0        | -5.30341 | 1.214997 | 6.518406 | 0.401894 | 0.273794 | 0.397918 |
| AC017076.5__antise | 0.537444 | 0        | 3.19746  | 0        | 3.97845  | 21.9652  | 0.864744 | 1.11534  | 2.39193  | -2.79624 | -0.22723 | 2.569012 | 0.331908 | 0.7399   | 0.371005 |
| AC017099.3__antise | 4.34565  | 4.36007  | 3.77559  | 2.40476  | 3.43206  | 27.1076  | 2.27442  | 4.12257  | 4.07784  | -1.40026 | 0.252843 | 1.653107 | 0.495779 | 0.450089 | 0.436955 |
| AC017104.6__proce  | 0.870387 | 0.72833  | 1.25758  | 14.2207  | 0.518584 | 8.83533  | 0.362274 | 38.2265  | 1.14574  | -3.04502 | -3.79817 | -0.75316 | 0.220858 | 0.43225  | 0.771902 |
| AC018359.1__lincRN | 24.4513  | 721.32   | 5.85     | 29.2141  | 63.6557  | 115.125  | 173.922  | 61.2551  | 5.97708  | 1.853458 | 1.64005  | -0.21341 | 0.529228 | 0.564527 | 0.894387 |
| AC018462.2__antise | 1.0812   | 0.934948 | 7.11641  | 4.20344  | 2.4568   | 106.237  | 1.83828  | 1.12146  | 1.64224  | -3.62785 | 0.988764 | 4.616612 | 0.39597  | 0.526943 | 0.402425 |
| AC018470.4__lincRN | 0        | 0.033159 | 0.116999 | 0.112252 | 3.55627  | 1.83286  | 0.278071 | 0        | 0.040735 | -5.19524 | -1.0862  | 4.109046 | 0.211923 | 0.664523 | 0.249287 |
| AC018495.3__lincRN | 0        | 0        | 0        | 0        | 0        | 4.75552  | 0.349515 | 0        | 0.193866 | #NUM!    | #NUM!    | 3.129567 | 0.42265  | 0.215071 | 0.468444 |
| AC018685.1__lincRN | 0.069249 | 0        | 1.56313  | 0        | 0        | 13.181   | 0        | 0        | 0.521191 | -3.01341 | 1.647092 | 4.660504 | 0.426101 | 0.385634 | 0.42265  |
| AC018717.1__lincRN | 1.2421   | 2.50395  | 0.547881 | 0        | 3.71736  | 714.898  | 0.065655 | 0        | 0.145711 | -7.38678 | 4.344482 | 11.73126 | 0.422675 | 0.156872 | 0.419708 |
| AC018730.3__antise | 0.047185 | 0.011128 | 2.05908  | 0.138121 | 2.35348  | 0.904051 | 0.124087 | 0.051621 | 0.041142 | -0.6814  | 3.287516 | 3.968915 | 0.71759  | 0.456741 | 0.253442 |
| AC018737.1__antise | 31.217   | 23.3771  | 23.4835  | 12.2443  | 14.1092  | 34.6728  | 24.1287  | 25.1651  | 20.8492  | 0.355478 | 0.15461  | -0.20087 | 0.588038 | 0.410456 | 0.753124 |
| AC018742.1__lincRN | 0        | 0        | 0.057223 | 0.1139   | 6.66126  | 4.44065  | 0        | 0        | 0        | -7.61473 | #DIV/0!  | #DIV/0!  | 0.192169 | 0.42265  | 0.19123  |
| AC018755.16__pseu  | 0.071732 | 0.063446 | 0.185445 | 0        | 2.47136  | 5.71592  | 1.23563  | 0.097932 | 0.07803  | -4.67443 | -2.13837 | 2.53606  | 0.247091 | 0.46135  | 0.373151 |
| AC018799.1__lincRN | 0.030149 | 0        | 0.36375  | 0.119531 | 2.25031  | 2.05921  | 0        | 0        | 0        | -3.4911  | #DIV/0!  | #DIV/0!  | 0.173558 | 0.376933 | 0.162323 |
| AC018804.6__pseud  | 9.42235  | 5.03736  | 5.22044  | 4.85481  | 10.6232  | 10.4854  | 3.93476  | 8.42621  | 4.26197  | -0.39974 | 0.243566 | 0.643304 | 0.593868 | 0.729302 | 0.190726 |
| AC018865.8__pseud  | 0.05038  | 28.3009  | 1.40968  | 1.83172  | 122.616  | 4.86356  | 12.7402  | 0.657514 | 0.161603 | -2.11936 | 1.134137 | 3.253492 | 0.391119 | 0.692731 | 0.454612 |
| AC018866.1__lincRN | 0        | 0        | 3.28322  | 0        | 2.55779  | 5.83093  | 0        | 0        | 0.091689 | -1.35334 | 5.162227 | 6.515566 | 0.183505 | 0.42265  | 0.237628 |

|                    |          |          |          |          |          |          |          |          |          |          |          |          |          |          |          |
|--------------------|----------|----------|----------|----------|----------|----------|----------|----------|----------|----------|----------|----------|----------|----------|----------|
| AC018890.4__lincRN | 0        | 0        | 0.128866 | 0        | 0.10314  | 25.1256  | 0.078861 | 0        | 0        | -7.61305 | 0.708484 | 8.321537 | 0.420272 | 0.808909 | 0.4221   |
| AC018890.6__antise | 102.687  | 4.53534  | 2.15767  | 92.0818  | 29.883   | 599.728  | 0.766166 | 9.538    | 3.61212  | -2.72204 | 2.974503 | 5.696539 | 0.409031 | 0.459932 | 0.322793 |
| AC019048.1__antise | 0        | 0.696373 | 1.64118  | 0        | 4.82458  | 79.1978  | 1.24946  | 6.09673  | 0        | -5.1677  | -1.652   | 3.515706 | 0.392778 | 0.499775 | 0.441174 |
| AC019055.1__lincRN | 0        | 0        | 0.533271 | 0.241641 | 0        | 25.889   | 0        | 0        | 0        | -5.61473 | #DIV/0!  | #DIV/0!  | 0.417174 | 0.42265  | 0.417286 |
| AC019068.2__antise | 0        | 0        | 0        | 0        | 0        | 0        | 0        | 0        | 0        | #DIV/0!  | #DIV/0!  | #DIV/0!  | #DIV/0!  | #DIV/0!  | #DIV/0!  |
| AC019118.2__lincRN | 0.102562 | 0.726783 | 2.09955  | 1.69149  | 9.53666  | 43.0168  | 0.592076 | 0.281884 | 0.542343 | -4.21106 | 1.048227 | 5.259287 | 0.292652 | 0.483831 | 0.298593 |
| AC019118.3__lincRN | 0.048629 | 0.363391 | 1.79528  | 0.894308 | 122.616  | 14.6577  | 0.878726 | 0        | 3.73022  | -5.968   | -1.06215 | 4.905843 | 0.361452 | 0.351033 | 0.373606 |
| AC019118.4__lincRN | 0        | 0        | 5.16875  | 5.29237  | 0        | 7.30759  | 0.758031 | 0        | 0.794799 | -1.28553 | 1.734916 | 3.020447 | 0.248381 | 0.529718 | 0.196291 |
| AC019186.1__lincRN | 18.5428  | 2.67104  | 1.81511  | 11.1082  | 2.01758  | 25.6659  | 1.0925   | 2.53748  | 1.69184  | -0.7523  | 2.113457 | 2.865756 | 0.635847 | 0.414184 | 0.256413 |
| AC019330.1__lincRN | 788.569  | 44.4729  | 1.60788  | 151.896  | 330.24   | 52.1068  | 0.800985 | 25.8812  | 3.61125  | 0.643675 | 4.784094 | 4.140418 | 0.752119 | 0.410658 | 0.152335 |
| AC020571.3__antise | 1.19375  | 0.52145  | 0.41408  | 2.56028  | 0.141347 | 0        | 0.249759 | 0.800949 | 0.241829 | -0.34346 | 0.72016  | 1.063623 | 0.776366 | 0.516642 | 0.663126 |
| AC020601.1__lincRN | 0        | 0        | 0.347472 | 0        | 0.132096 | 6.30662  | 0.169936 | 0        | 0        | -4.2118  | 1.031905 | 5.24371  | 0.409997 | 0.735005 | 0.426448 |
| AC021016.8__antise | 0        | 9.05991  | 0.931706 | 0        | 7.32585  | 28.6016  | 0        | 0        | 0        | -1.8463  | #DIV/0!  | #DIV/0!  | 0.459892 | 0.366616 | 0.29745  |
| AC021106.1__pseud  | 0.064603 | 0.07625  | 0.193082 | 0.928668 | 0        | 0.302216 | 0.438616 | 0.489451 | 0.069534 | -1.88206 | -1.5789  | 0.30316  | 0.407667 | 0.328793 | 0.815664 |
| AC021188.4__antise | 0.212326 | 0.025041 | 0.777685 | 0.112567 | 1.0605   | 19.1934  | 0.561636 | 0.046351 | 0        | -4.32657 | 0.739443 | 5.066013 | 0.39428  | 0.724414 | 0.406642 |
| AC021224.1__lincRN | 0        | 63.9064  | 49.7354  | 76.6436  | 68.8135  | 40.1166  | 0        | 62.4397  | 64.0613  | -0.7075  | -0.15466 | 0.552843 | 0.463442 | 0.484454 | 0.576588 |
| AC022154.7__antise | 259.069  | 271.422  | 3.65361  | 113.071  | 78.5895  | 74.6279  | 97.1026  | 261      | 184.741  | 1.004241 | -0.02331 | -1.02755 | 0.386482 | 0.979347 | 0.252718 |
| AC022201.4__antise | 0        | 0        | 0        | 0.421168 | 4.8575   | 8.03076  | 0        | 0.036751 | 0        | #NUM!    | #NUM!    | 8.500461 | 0.182096 | 0.42265  | 0.182706 |
| AC022596.6__pseud  | 0        | 0        | 0.300197 | 0.065991 | 0.141574 | 0        | 0.008119 | 0.108622 | 0.072126 | 0.532349 | 0.668535 | 0.136185 | 0.841959 | 0.74569  | 0.890039 |
| AC022816.2__lincRN | 1.26261  | 0.009933 | 1.07047  | 0.089695 | 6.94635  | 2.74643  | 0.218572 | 0        | 0.045916 | -2.06183 | 3.14709  | 5.208925 | 0.406068 | 0.179638 | 0.262777 |
| AC023085.1__pseud  | 0        | 0        | 0.444389 | 19.1783  | 10.7257  | 1.73487  | 0.253191 | 0.040341 | 0        | -6.15373 | 0.598307 | 6.752038 | 0.181791 | 0.830234 | 0.169944 |
| AC023115.1__lincRN | 0.278713 | 0.570341 | 1.47109  | 15.1843  | 56.1082  | 73.0158  | 2.23777  | 0.10922  | 0.181654 | -5.9588  | -0.12415 | 5.834647 | 0.106901 | 0.949638 | 0.117745 |
| AC023115.2__lincRN | 0        | 0.368009 | 0        | 0        | 9.80091  | 15.1765  | 0.266305 | 0        | 0.463969 | -6.08474 | -0.9887  | 5.096042 | 0.204872 | 0.677888 | 0.208202 |
| AC023115.4__lincRN | 0.454322 | 0        | 0        | 0        | 0.748418 | 0        | 0.37768  | 0        | 0.209557 | -0.72013 | -0.37023 | 0.349901 | 0.806063 | 0.656086 | 0.892308 |
| AC023469.2__antise | 0        | 0        | 0        | 0        | 6.66372  | 10.1742  | 0        | 0        | 0        | #NUM!    | #DIV/0!  | #DIV/0!  | 0.20069  | #DIV/0!  | 0.20069  |
| AC024132.1__lincRN | 0        | 0.027845 | 0.035468 | 0.078488 | 0.126324 | 0.101809 | 0.081074 | 0.025822 | 0.051447 | -2.27587 | -1.32246 | 0.953408 | 0.013084 | 0.336242 | 0.238658 |
| AC024560.2__lincRN | 0.042081 | 5.37419  | 4.59651  | 14.2207  | 1.30098  | 21.1542  | 0.588773 | 0.310049 | 2.65798  | -1.87299 | 1.49319  | 3.366179 | 0.305833 | 0.316078 | 0.168577 |
| AC024592.9__antise | 3.40498  | 0        | 0.160438 | 0        | 19.6386  | 7.4307   | 2.79037  | 0        | 0.029032 | -2.92451 | 0.338682 | 3.263196 | 0.360394 | 0.314698 | 0.338711 |
| AC024619.2__sense  | 0        | 0        | 1.66162  | 0        | 0.555665 | 3.69066  | 0.285308 | 0        | 0        | -1.35362 | 2.541998 | 3.895623 | 0.290657 | 0.528681 | 0.389045 |
| AC025165.8__antise | 1.07844  | 0.645463 | 0.948611 | 0.617845 | 0        | 1.80326  | 0.429882 | 0.688981 | 0.801783 | 0.142532 | 0.476606 | 0.334074 | 0.875497 | 0.348596 | 0.765096 |
| AC026150.5__lincRN | 0.020353 | 0.011999 | 0.098554 | 0.045175 | 2.78702  | 2.16878  | 0.151014 | 0.014852 | 0.014798 | -5.2556  | -0.46478 | 4.790825 | 0.187888 | 0.814931 | 0.207624 |
| AC026188.1__lincRN | 7.83898  | 19.4478  | 2.57505  | 34.9474  | 150.782  | 15.0513  | 0.561286 | 4.32893  | 1.16632  | -2.74925 | 2.301738 | 5.050984 | 0.26731  | 0.183768 | 0.25584  |
| AC026202.3__antise | 6.47289  | 3.62801  | 4.74839  | 3.32946  | 9.9483   | 820.65   | 3.7153   | 6.72507  | 6.13912  | -5.81146 | -0.15901 | 5.652451 | 0.420423 | 0.771611 | 0.420643 |
| AC026202.5__lincRN | 0        | 0.074693 | 0        | 0        | 2.50865  | 0        | 0        | 0        | 0        | -5.0698  | #DIV/0!  | #DIV/0!  | 0.42265  | 0.42265  | 0.42265  |
| AC027612.1__pseud  | 0.016461 | 3.61393  | 4.49569  | 4.72547  | 0.489114 | 2.20726  | 1.7956   | 7.29109  | 5.8559   | 0.130782 | -0.8788  | -1.00958 | 0.933315 | 0.085926 | 0.474075 |

|                    |          |          |          |          |          |          |          |          |          |          |          |          |          |          |          |
|--------------------|----------|----------|----------|----------|----------|----------|----------|----------|----------|----------|----------|----------|----------|----------|----------|
| AC027612.6__pseud  | 14.965   | 41.4406  | 17.2172  | 11.775   | 11.5915  | 49.7618  | 22.8787  | 19.4697  | 1.52658  | 0.009723 | 0.746754 | 0.737031 | 0.993552 | 0.38954  | 0.663019 |
| AC034110.1__lincRN | 0        | 0        | 0.012749 | 0        | 0.122564 | 0.121941 | 0        | 0        | 0.041602 | -4.26144 | -1.7063  | 2.555139 | 0.184859 | 0.42265  | 0.200629 |
| AC034187.2__lincRN | 0.712444 | 0.790962 | 0.802831 | 1.29534  | 0.34865  | 0.863111 | 1.54966  | 1.76239  | 0.508921 | -0.12048 | -0.7284  | -0.60792 | 0.842046 | 0.335295 | 0.487269 |
| AC034193.5__pseud  | 2.50615  | 5.73253  | 0.982351 | 42.9047  | 7.29561  | 153.5    | 16.7452  | 0.052211 | 7.10705  | -4.46538 | -1.37428 | 3.091096 | 0.288382 | 0.486476 | 0.302798 |
| AC034229.1__pseud  | 0        | 0        | 0        | 0        | 0        | 1.54847  | 1.22144  | 0        | 0        | #NUM!    | #NUM!    | 0.34226  | 0.42265  | 0.42265  | 0.904265 |
| AC051649.6__lincRN | 0        | 0        | 0.385496 | 0        | 0.050947 | 2.10308  | 0.188012 | 0        | 0.104342 | -2.48225 | 0.399    | 2.881248 | 0.405786 | 0.841007 | 0.464778 |
| AC053503.11__antis | 5.18452  | 2.4971   | 4.43505  | 2.38782  | 5.12105  | 5.45629  | 1.68927  | 4.8611   | 6.02464  | -0.09765 | -0.05357 | 0.04408  | 0.876561 | 0.941314 | 0.759684 |
| AC053503.4__antise | 4.90413  | 4.61708  | 4.21624  | 4.08189  | 2.67794  | 10.1344  | 2.80594  | 6.38828  | 4.42164  | -0.29842 | 0.012826 | 0.311242 | 0.709865 | 0.974505 | 0.726889 |
| AC061992.2__lincRN | 6.04615  | 0        | 3.2125   | 1.07262  | 2.0354   | 17.1353  | 2.33016  | 0.138971 | 1.36355  | -1.12857 | 1.272448 | 2.40102  | 0.575044 | 0.245662 | 0.405419 |
| AC062020.1__lincRN | 0        | 0        | 0.084838 | 0        | 0.044924 | 0.240882 | 0.041405 | 0        | 0        | -1.75225 | 1.034911 | 2.78716  | 0.285458 | 0.73437  | 0.432194 |
| AC062021.1__lincRN | 0        | 0        | 0        | 0        | 0.424589 | 0        | 0        | 0        | 0        | #NUM!    | #DIV/0!  | #DIV/0!  | 0.42265  | #DIV/0!  | 0.42265  |
| AC062028.1__lincRN | 0.030612 | 0.08412  | 3.37697  | 3.79542  | 4.06837  | 58.0879  | 1.70095  | 0.200111 | 0.536709 | -4.23941 | 0.518368 | 4.757776 | 0.34416  | 0.815445 | 0.364685 |
| AC062029.1__antise | 0        | 0        | 0        | 0        | 0        | 3.18131  | 0        | 0        | 0        | #NUM!    | #DIV/0!  | #DIV/0!  | 0.42265  | #DIV/0!  | 0.42265  |
| AC062031.1__lincRN | 0        | 0        | 0.138597 | 0        | 0        | 10.391   | 0        | 0        | 0.150095 | -6.22829 | -0.11498 | 6.113315 | 0.42265  | 0.42265  | 0.42265  |
| AC064834.1__lincRN | 0.62006  | 1.76246  | 2.913    | 0.654305 | 3.61809  | 3.56664  | 0.507479 | 0.744678 | 2.94278  | -0.5659  | 0.336123 | 0.902027 | 0.253692 | 0.379727 | 0.285358 |
| AC064834.2__lincRN | 0.039541 | 0.046648 | 2.05375  | 0        | 2.91125  | 4.42436  | 0.481959 | 0.172018 | 0.171204 | -1.77735 | 1.374787 | 3.152134 | 0.193299 | 0.608298 | 0.260346 |
| AC064865.1__lincRN | 0        | 0        | 0.736734 | 0        | 600.983  | 10.7729  | 0        | 0        | 0        | -9.6976  | #DIV/0!  | #DIV/0!  | 0.41309  | 0.42265  | 0.412395 |
| AC064871.3__antise | 1.83477  | 0.492394 | 0.332073 | 0.241586 | 0.10019  | 20.0521  | 0.167324 | 0.60161  | 0.698336 | -2.93905 | 0.857878 | 3.79693  | 0.482565 | 0.597716 | 0.435586 |
| AC064875.2__proce  | 0.114804 | 1.01044  | 1.32378  | 0.091245 | 20.317   | 25.6659  | 2.44132  | 14.8771  | 0        | -4.23368 | -2.82203 | 1.41165  | 0.189321 | 0.392122 | 0.369726 |
| AC066593.1__antise | 0.095267 | 0        | 0        | 0.187776 | 13.7645  | 1.56636  | 0        | 1.62934  | 0        | -7.34781 | -4.09616 | 3.251642 | 0.357232 | 0.457334 | 0.344708 |
| AC067956.1__lincRN | 0.029177 | 0        | 0.87719  | 1.54973  | 19.7037  | 21.6056  | 1.08939  | 0        | 0        | -5.56336 | -0.26535 | 5.298007 | 0.154263 | 0.923209 | 0.17538  |
| AC067959.1__lincRN | 0.542593 | 0.183016 | 1.64556  | 0        | 49.9894  | 203.143  | 0.768959 | 0        | 0.552493 | -6.73815 | 0.843474 | 7.581624 | 0.302489 | 0.464221 | 0.303281 |
| AC067960.1__lincRN | 0.041789 | 0        | 0.751026 | 0.165049 | 18.6963  | 17.7928  | 0.949282 | 0.04543  | 0.090423 | -5.53085 | -0.45282 | 5.07803  | 0.181574 | 0.849766 | 0.20176  |
| AC068057.1__lincRN | 0        | 0        | 0.09858  | 0        | 0        | 25.1256  | 0.240362 | 0        | 0.266787 | -7.99365 | -2.36305 | 5.630605 | 0.42265  | 0.195946 | 0.428259 |
| AC068057.2__lincRN | 0        | 0.016732 | 0.19518  | 0.129563 | 3.91145  | 17.0612  | 0.361683 | 0        | 0        | -6.63779 | -0.77126 | 5.866525 | 0.303248 | 0.789776 | 0.31595  |
| AC068134.5__pseud  | 0        | 0        | 0.193082 | 1.08111  | 3.20262  | 0        | 0        | 0        | 0        | -4.47158 | #DIV/0!  | #DIV/0!  | 0.302434 | 0.42265  | 0.268318 |
| AC068138.1__lincRN | 0.197406 | 0        | 0.422906 | 0.037292 | 8.18274  | 28.2325  | 0.275661 | 0        | 0        | -5.87688 | 1.170099 | 7.04698  | 0.286356 | 0.537337 | 0.289455 |
| AC068196.1__lincRN | 0.886166 | 1.35035  | 0.439318 | 0.707521 | 4.55845  | 11.7979  | 1.29586  | 0        | 2.46541  | -2.67288 | -0.49123 | 2.181653 | 0.296278 | 0.74619  | 0.261722 |
| AC068282.3__lincRN | 1.48704  | 1.01623  | 2.06177  | 0.996907 | 0.460481 | 2.01708  | 0.655378 | 0.946494 | 1.89096  | 0.393835 | 0.38623  | -0.00761 | 0.151827 | 0.273326 | 0.98254  |
| AC068286.1__lincRN | 0        | 0        | 0.381336 | 0        | 2.41206  | 15.1765  | 1.09184  | 0.186208 | 0        | -5.52743 | -1.74481 | 3.782623 | 0.337274 | 0.55804  | 0.387626 |
| AC068483.1__lincRN | 0.162276 | 0        | 0        | 0        | 4.3248   | 21.7577  | 0        | 0        | 0        | -7.32849 | #DIV/0!  | #DIV/0!  | 0.325411 | 0.42265  | 0.32117  |
| AC068490.2__lincRN | 0        | 0        | 0.19624  | 0        | 19.2703  | 505.513  | 0.090847 | 0        | 0        | -11.3849 | 1.111113 | 12.496   | 0.401068 | 0.718616 | 0.40118  |
| AC068492.1__lincRN | 0        | 0.101368 | 0.426783 | 1.99805  | 0.961488 | 2.13386  | 0        | 0        | 0        | -3.26961 | #DIV/0!  | #DIV/0!  | 0.046802 | 0.304858 | 0.04441  |
| AC068499.10__antis | 0.329209 | 0.218396 | 1.68056  | 0.594755 | 0.678432 | 4.86356  | 0.463343 | 0.336915 | 0.178949 | -1.46162 | 1.18617  | 2.647788 | 0.30071  | 0.523167 | 0.366294 |
| AC068535.3__lincRN | 0.124873 | 0.094394 | 0.159074 | 0        | 17.7302  | 0        | 0.154593 | 0        | 0        | -5.55038 | 1.291211 | 6.84159  | 0.431983 | 0.310464 | 0.427706 |

|                    |          |          |          |          |          |          |          |          |          |          |          |          |          |          |          |
|--------------------|----------|----------|----------|----------|----------|----------|----------|----------|----------|----------|----------|----------|----------|----------|----------|
| AC068535.4__lincRN | 0.042748 | 0        | 0.682843 | 0        | 10.078   | 18.2292  | 0.333249 | 0.185858 | 0        | -5.28587 | 0.483125 | 5.768993 | 0.213022 | 0.844163 | 0.226558 |
| AC068542.1__antise | 0        | 0        | 0        | 0        | 1.66634  | 8.79704  | 0        | 0        | 0        | #NUM!    | #DIV/0!  | #DIV/0!  | 0.325285 | #DIV/0!  | 0.325285 |
| AC068580.6__antise | 0        | 0        | 0        | 0        | 0        | 0        | 0        | 0        | 0        | #DIV/0!  | #DIV/0!  | #DIV/0!  | #DIV/0!  | #DIV/0!  | #DIV/0!  |
| AC068718.1__lincRN | 0        | 0        | 1.44515  | 7.34528  | 84.9409  | 398.421  | 0.744275 | 0        | 0.049544 | -8.4075  | 0.864337 | 9.271836 | 0.304295 | 0.762247 | 0.305681 |
| AC068831.3__antise | 4.99949  | 2.31961  | 0        | 1.41275  | 1.81162  | 9.84922  | 2.04638  | 2.02395  | 11.9269  | -0.83692 | -1.12808 | -0.29117 | 0.683413 | 0.592346 | 0.226593 |
| AC068858.1__lincRN | 0        | 0.060312 | 1.08932  | 0.559243 | 3.45031  | 8.51284  | 0.150036 | 0.093497 | 0.138819 | -3.44527 | 1.5882   | 5.033467 | 0.197309 | 0.539914 | 0.223894 |
| AC069277.2__lincRN | 0        | 0.016014 | 0.057253 | 0.526567 | 13.7645  | 32.5291  | 0.16736  | 0.032767 | 2.15001  | -9.31975 | -5.00344 | 4.316313 | 0.234701 | 0.373876 | 0.229918 |
| AC069394.1__lincRN | 0.685283 | 1.40425  | 0.92847  | 0        | 0.581743 | 7.76341  | 0        | 0        | 0.679512 | -1.46734 | 2.151023 | 3.618368 | 0.555434 | 0.146703 | 0.377333 |
| AC072062.1__antise | 4.83439  | 7.13336  | 6.94254  | 3.25326  | 19.8487  | 113.091  | 3.5248   | 6.057    | 4.4264   | -2.84841 | 0.4329   | 3.281309 | 0.366687 | 0.067133 | 0.355984 |
| AC073043.1__proce  | 9.84842  | 4.35139  | 5.01854  | 2.17163  | 4.48546  | 52.1068  | 6.8456   | 3.94788  | 4.64691  | -1.61245 | 0.315775 | 1.928221 | 0.521451 | 0.28544  | 0.47554  |
| AC073128.10__antis | 0        | 0        | 0.745906 | 8.36822  | 4.02922  | 22.6831  | 1.84824  | 0        | 0.656309 | -5.55553 | -1.74749 | 3.808048 | 0.167876 | 0.451282 | 0.193568 |
| AC073218.1__lincRN | 0.016877 | 0.069389 | 1.03513  | 61.2968  | 12.0587  | 182.685  | 1.52236  | 0.119817 | 0.256709 | -7.83493 | -0.75986 | 7.075075 | 0.233779 | 0.735261 | 0.237148 |
| AC073218.2__lincRN | 0.673254 | 0        | 1.80395  | 0.859824 | 819.523  | 15.1765  | 1.16038  | 0        | 0        | -8.39789 | 1.094115 | 9.492001 | 0.413176 | 0.593127 | 0.412271 |
| AC073254.1__antise | 17.7454  | 10.1795  | 12.151   | 1.97356  | 36.7152  | 143.906  | 1.74314  | 13.2134  | 17.322   | -2.18784 | 0.31216  | 2.499998 | 0.391948 | 0.736559 | 0.325927 |
| AC073257.1__lincRN | 0        | 0        | 0.766085 | 0        | 6.54509  | 6.35439  | 0        | 0        | 0        | -4.07366 | #DIV/0!  | #DIV/0!  | 0.18603  | 0.42265  | 0.183593 |
| AC073257.2__lincRN | 0        | 0        | 0        | 0.189445 | 0        | 1.06834  | 0.14073  | 0        | 0        | #NUM!    | #NUM!    | 3.159884 | 0.330712 | 0.42265  | 0.39695  |
| AC073283.4__lincRN | 11.9887  | 11.8691  | 12.0979  | 12.162   | 136.332  | 88.5815  | 11.7471  | 12.54    | 10.2537  | -2.72105 | 0.057919 | 2.778973 | 0.205143 | 0.586856 | 0.201775 |
| AC073284.4__lincRN | 0        | 0        | 1.27737  | 0        | 0        | 7.14037  | 0        | 0        | 0        | -2.48282 | #DIV/0!  | #DIV/0!  | 0.42265  | 0.42265  | 0.42265  |
| AC073321.3__antise | 0        | 0        | 0.053684 | 0        | 4.23077  | 1.98143  | 0.539245 | 0        | 0        | -6.85446 | -3.32837 | 3.526091 | 0.235229 | 0.482685 | 0.303545 |
| AC073409.1__lincRN | 0        | 0        | 0        | 0        | 0.923059 | 0        | 0        | 0        | 0        | #NUM!    | #DIV/0!  | #DIV/0!  | 0.42265  | #DIV/0!  | 0.42265  |
| AC073479.1__proce  | 0.01536  | 0.015347 | 1.51604  | 0.083641 | 4.33054  | 50.6751  | 0.10297  | 0.076744 | 0.078869 | -5.15446 | 2.580538 | 7.735001 | 0.373577 | 0.483938 | 0.37653  |
| AC073628.1__lincRN | 0        | 0        | 0        | 0        | 6.81389  | 0.057473 | 0        | 0        | 0        | #NUM!    | #DIV/0!  | #DIV/0!  | 0.417801 | #DIV/0!  | 0.417801 |
| AC073636.1__lincRN | 0        | 0.159133 | 0        | 0        | 0.279169 | 4.57016  | 0.063572 | 0        | 0        | -4.92948 | 1.323774 | 6.253254 | 0.40769  | 0.678035 | 0.396596 |
| AC073834.3__antise | 2.09262  | 1.89995  | 3.51595  | 2.96916  | 0        | 0.609686 | 0.856009 | 1.95108  | 0.982397 | 1.069034 | 0.986526 | -0.08251 | 0.366458 | 0.238506 | 0.958067 |
| AC073928.2__lincRN | 0        | 0        | 1.1243   | 0        | 3.33159  | 3.25524  | 0        | 0        | 0        | -2.55056 | #DIV/0!  | #DIV/0!  | 0.202539 | 0.42265  | 0.183558 |
| AC073987.1__lincRN | 0        | 0        | 1.02655  | 1.53353  | 9.28457  | 5.82947  | 0        | 0        | 0.182771 | -4.01944 | 2.489695 | 6.509131 | 0.146366 | 0.42265  | 0.133816 |
| AC074117.10__antis | 0        | 1.44973  | 1.22419  | 2.03438  | 1.1624   | 6.19807  | 1.3181   | 0        | 0        | -1.81291 | 1.020496 | 2.83341  | 0.278952 | 0.661185 | 0.265267 |
| AC074212.5__antise | 0.525717 | 0.464916 | 0        | 0.618022 | 0.300058 | 0.689323 | 0.291582 | 0.345131 | 0.200577 | -0.69831 | 0.242623 | 0.940932 | 0.501793 | 0.732332 | 0.245713 |
| AC074286.1__sense  | 2.11125  | 2.39906  | 3.24645  | 4.79302  | 1032.98  | 177.814  | 1.41243  | 3.53594  | 3.60836  | -7.29198 | -0.14161 | 7.150378 | 0.332857 | 0.665967 | 0.332546 |
| AC074289.1__antise | 47.9809  | 8.23279  | 95.0012  | 321.555  | 14.675   | 237.085  | 27.1745  | 16.6883  | 9.36947  | -1.92273 | 1.506227 | 3.428955 | 0.209634 | 0.360989 | 0.193214 |
| AC074363.1__lincRN | 0.087742 | 0        | 5.59146  | 5.71839  | 37.5408  | 73.2321  | 0.411978 | 53.8271  | 0        | -4.35839 | -3.25557 | 1.102818 | 0.175173 | 0.481943 | 0.522112 |
| AC074391.1__lincRN | 0.273723 | 0.117398 | 3.08651  | 1.88685  | 53.7895  | 370.709  | 2.24206  | 0.131087 | 2.13975  | -6.93791 | -0.37595 | 6.56196  | 0.342798 | 0.726352 | 0.346047 |
| AC078899.1__pseud  | 5.15273  | 4.77584  | 117.953  | 3.5473   | 2.57691  | 1.70349  | 74.9916  | 85.0546  | 69.277   | 4.030076 | -0.84257 | -4.87265 | 0.403919 | 0.49947  | 0.003637 |
| AC079117.1__antise | 0        | 0        | 0.065412 | 0        | 2.12295  | 129.986  | 0        | 0        | 0        | -10.9799 | #DIV/0!  | #DIV/0!  | 0.413294 | 0.42265  | 0.413299 |
| AC079135.1__antise | 0.023443 | 0.138245 | 35.147   | 0        | 24.1173  | 40.6614  | 2.66386  | 0        | 0        | -0.8755  | 3.728433 | 4.603929 | 0.308492 | 0.465263 | 0.24263  |

|                    |          |          |          |          |          |          |          |          |          |          |          |          |          |          |          |
|--------------------|----------|----------|----------|----------|----------|----------|----------|----------|----------|----------|----------|----------|----------|----------|----------|
| AC079150.3__lincRN | 1.53592  | 0        | 0        | 3.19545  | 2.10363  | 3.8152   | 0        | 0.53716  | 0        | -2.56903 | 1.515679 | 4.084705 | 0.0615   | 0.645615 | 0.050854 |
| AC079154.1__antise | 0        | 0        | 0.069818 | 0.457341 | 2.6749   | 1.96357  | 0.135857 | 0.151619 | 0        | -6.18957 | -2.04177 | 4.147798 | 0.123114 | 0.416111 | 0.136087 |
| AC079163.1__lincRN | 0        | 0        | 0.105248 | 0        | 2.40439  | 0        | 0        | 0        | 0        | -4.51381 | #DIV/0!  | #DIV/0!  | 0.44845  | 0.42265  | 0.42265  |
| AC079250.1__pseud  | 282.404  | 103.485  | 148.846  | 80.1288  | 31.7953  | 5.58224  | 61.6297  | 199.68   | 132.156  | 2.186086 | 0.442586 | -1.7435  | 0.066436 | 0.662128 | 0.245137 |
| AC079305.8__antise | 10.3833  | 15.5879  | 10.2032  | 7.77317  | 5.0558   | 389.456  | 9.02715  | 11.6732  | 11.9176  | -3.47518 | 0.149303 | 3.62448  | 0.442885 | 0.542044 | 0.434777 |
| AC079584.2__lincRN | 0        | 0        | 0.948117 | 0        | 2.61344  | 4.3804   | 0        | 0        | 0        | -2.88295 | #DIV/0!  | #DIV/0!  | 0.190891 | 0.42265  | 0.208377 |
| AC079586.1__lincRN | 0        | 0        | 0.229699 | 0.107598 | 11.0858  | 1626.12  | 0.059552 | 0.029506 | 0.073479 | -12.7993 | 0.498975 | 13.29827 | 0.418688 | 0.771598 | 0.41872  |
| AC079610.1__sense  | 8.49223  | 0.906643 | 1.31866  | 16.6624  | 41.8363  | 49.4162  | 0.086476 | 2.25289  | 7.27619  | -3.33185 | 0.156531 | 3.48838  | 0.118791 | 0.938768 | 0.05639  |
| AC079612.2__lincRN | 0        | 0        | 0        | 0        | 0        | 2.25232  | 0        | 0        | 0        | #NUM!    | #DIV/0!  | #DIV/0!  | 0.42265  | #DIV/0!  | 0.42265  |
| AC079613.1__sense  | 0.085254 | 0.084443 | 3.36331  | 5.48309  | 9.80091  | 56.3324  | 0.250376 | 0        | 0        | -4.34132 | 3.818729 | 8.16005  | 0.273726 | 0.437354 | 0.282394 |
| AC079630.2__lincRN | 0.08559  | 0        | 0        | 0        | 1.4143   | 0        | 0        | 0        | 0        | -4.0465  | #DIV/0!  | #DIV/0!  | 0.45858  | 0.42265  | 0.42265  |
| AC079630.4__antise | 0        | 0        | 0        | 0        | 4.69814  | 6.19149  | 0        | 0.068513 | 0.545089 | #NUM!    | #NUM!    | 4.149508 | 0.191074 | 0.355155 | 0.187471 |
| AC079776.1__lincRN | 0        | 0        | 0.862463 | 0        | 0.842483 | 4.7563   | 0        | 0.072062 | 0        | -2.69858 | 3.58116  | 6.279739 | 0.313615 | 0.472727 | 0.337762 |
| AC079776.2__pseud  | 0        | 0        | 0        | 0        | 4.08102  | 28.9143  | 0        | 0        | 0        | #NUM!    | #DIV/0!  | #DIV/0!  | 0.347627 | #DIV/0!  | 0.347627 |
| AC079776.3__lincRN | 0.012388 | 0        | 0.545783 | 0.049402 | 7.99119  | 17.7696  | 0.394898 | 0.013545 | 0.080959 | -5.53109 | 0.189688 | 5.720777 | 0.23216  | 0.934061 | 0.246735 |
| AC079776.7__pseud  | 0        | 0        | 0        | 0        | 3.67195  | 1.17357  | 0        | 0        | 0        | #NUM!    | #DIV/0!  | #DIV/0!  | 0.27429  | #DIV/0!  | 0.27429  |
| AC079779.4__proce  | 0        | 0        | 0        | 0.963588 | 56.1082  | 9.07124  | 0.65654  | 0.559619 | 0.169373 | #NUM!    | #NUM!    | 5.577077 | 0.328213 | 0.090102 | 0.335425 |
| AC079779.5__lincRN | 0        | 0        | 0.944931 | 0        | 8.19094  | 6.29361  | 1.52862  | 0        | 0.586845 | -3.93816 | -1.16269 | 2.775468 | 0.20092  | 0.569549 | 0.29289  |
| AC079779.6__lincRN | 0.039822 | 0.046517 | 0.318142 | 0.290223 | 3.2883   | 12.5806  | 0.291435 | 0.171536 | 0        | -5.32013 | -0.19485 | 5.125283 | 0.283005 | 0.920439 | 0.300808 |
| AC079807.2__antise | 0        | 0        | 0        | 4.44309  | 2.62948  | 8.34691  | 4.33256  | 0        | 0        | #NUM!    | #NUM!    | 1.831462 | 0.092938 | 0.42265  | 0.268619 |
| AC079807.4__lincRN | 0.049772 | 0.020981 | 3.07386  | 2.14047  | 12.442   | 177.814  | 1.39149  | 0.032468 | 0.07117  | -5.93506 | 1.072614 | 7.00767  | 0.37632  | 0.710436 | 0.381419 |
| AC079896.1__lincRN | 0        | 0        | 0        | 0        | 1.46296  | 32.5291  | 0        | 0        | 0        | #NUM!    | #DIV/0!  | #DIV/0!  | 0.397293 | #DIV/0!  | 0.397293 |
| AC079922.3__lincRN | 0.204348 | 0.927888 | 0.400827 | 0.138234 | 243.551  | 26.3382  | 2.30651  | 0.129991 | 0.194221 | -7.46055 | -0.77904 | 6.681503 | 0.364706 | 0.719334 | 0.369435 |
| AC079988.3__lincRN | 0        | 0        | 0.486299 | 0.182043 | 0.876025 | 4.11632  | 0.540755 | 0        | 0        | -3.41147 | -0.15313 | 3.258341 | 0.276033 | 0.956769 | 0.366624 |
| AC083899.3__pseud  | 6.95855  | 9.71922  | 11.2456  | 2.1327   | 12.8644  | 11.3703  | 9.79227  | 7.88533  | 11.8049  | 0.082718 | -0.07839 | -0.1611  | 0.844083 | 0.736901 | 0.803356 |
| AC084018.1__lincRN | 2.14335  | 2.20947  | 0        | 1.25521  | 6.83744  | 2.91742  | 2.25273  | 33.5452  | 1.08721  | -1.3388  | -3.08302 | -1.74422 | 0.306517 | 0.400967 | 0.442346 |
| AC084149.1__lincRN | 0        | 0        | 0        | 0        | 0        | 0        | 0.10414  | 0.820977 | 0        | #DIV/0!  | #NUM!    | #NUM!    | #DIV/0!  | 0.354585 | 0.354585 |
| AC084149.2__lincRN | 0        | 0        | 0        | 0        | 1.38849  | 4.21569  | 0        | 0        | 0.207717 | #NUM!    | #NUM!    | 4.753812 | 0.271014 | 0.42265  | 0.265466 |
| AC084193.1__lincRN | 0        | 0        | 4.22927  | 6.06775  | 11.7405  | 471.812  | 0.970427 | 0        | 0.338025 | -6.85511 | 1.692548 | 8.547658 | 0.4009   | 0.579512 | 0.402251 |
| AC084219.4__antise | 0        | 0        | 3.05094  | 4.22554  | 0        | 4.33007  | 2.87531  | 0        | 0        | -1.48762 | 0.085536 | 1.573153 | 0.280137 | 0.975813 | 0.276954 |
| AC087073.1__lincRN | 0        | 0        | 0        | 0        | 0.254824 | 4.18214  | 0.058897 | 0        | 0        | #NUM!    | #NUM!    | 6.235235 | 0.388605 | 0.42265  | 0.39678  |
| AC087294.2__antise | 3.89257  | 1.81205  | 2.80659  | 11.1082  | 4.61538  | 23.1152  | 0.714915 | 2.82851  | 1.82217  | -2.19006 | 0.665626 | 2.855688 | 0.194364 | 0.477897 | 0.186676 |
| AC087430.1__lincRN | 0        | 0        | 0.039343 | 0        | 0.101005 | 0.052776 | 0.053983 | 0.017192 | 0.008564 | -1.96671 | -1.01921 | 0.947498 | 0.351575 | 0.638256 | 0.608026 |
| AC090044.1__lincRN | 0.022023 | 0.724535 | 0.051477 | 0.087967 | 26.8686  | 13.3066  | 0.986793 | 0.048206 | 0.064039 | -5.65687 | -0.46172 | 5.195148 | 0.222676 | 0.852511 | 0.244397 |
| AC090044.2__lincRN | 0.079049 | 0.093324 | 0.23593  | 0.308468 | 0        | 10.4465  | 0        | 0        | 0.254418 | -4.71922 | 0.682438 | 5.401659 | 0.415126 | 0.281724 | 0.405448 |

|                    |          |          |          |          |          |          |          |          |          |          |          |          |          |          |          |
|--------------------|----------|----------|----------|----------|----------|----------|----------|----------|----------|----------|----------|----------|----------|----------|----------|
| AC090505.1__lincRN | 0        | 0        | 0        | 0        | 0        | 2.89098  | 0.831448 | 0        | 0        | #NUM!    | #NUM!    | 1.797861 | 0.42265  | 0.42265  | 0.604719 |
| AC090505.6__lincRN | 0.015943 | 0.018799 | 0.983497 | 0.445321 | 53.505   | 67.7388  | 0.804952 | 2.66932  | 0.034765 | -6.90098 | -1.785   | 5.115981 | 0.185542 | 0.508132 | 0.194107 |
| AC090587.5__antise | 0.072862 | 0        | 0        | 0.474819 | 0.380751 | 43.0168  | 0.35273  | 0        | 0.078277 | -9.23393 | -2.56448 | 6.669457 | 0.412193 | 0.288475 | 0.415914 |
| AC090627.1__antise | 4.68351  | 2.07092  | 1.79574  | 8.81557  | 10.6907  | 3.09261  | 1.69403  | 0        | 5.0605   | -1.40223 | 0.340098 | 1.742324 | 0.159181 | 0.78787  | 0.296078 |
| AC090939.1__proce  | 0        | 0        | 1.22688  | 1.10966  | 1.90809  | 10.7446  | 0        | 0        | 0        | -3.48766 | #DIV/0!  | #DIV/0!  | 0.259251 | 0.42265  | 0.275621 |
| AC091199.1__lincRN | 0.083542 | 0        | 0.166154 | 0        | 0.97241  | 25.9589  | 1.85599  | 0        | 0        | -6.75297 | -2.89394 | 3.859024 | 0.40318  | 0.479056 | 0.444109 |
| AC091814.2__lincRN | 0.699005 | 0        | 0        | 0.220684 | 10.9934  | 95.9374  | 0        | 0        | 0.353013 | -7.26013 | 0.985581 | 8.245715 | 0.363543 | 0.744909 | 0.359141 |
| AC091814.3__lincRN | 0        | 0        | 0        | 0.061178 | 0        | 0.033343 | 0.064939 | 0        | 0        | #NUM!    | #NUM!    | 0.541544 | 0.216758 | 0.42265  | 0.491008 |
| AC091878.1__antise | 6.92561  | 1.55379  | 1.76746  | 0.85197  | 3.75238  | 67.6526  | 1.70107  | 2.97092  | 2.46282  | -2.81795 | 0.522235 | 3.340189 | 0.4592   | 0.670794 | 0.423339 |
| AC092159.2__antise | 7.46511  | 3.52559  | 3.79777  | 1.65192  | 2.21933  | 26.7727  | 3.12486  | 3.62234  | 2.70232  | -1.05113 | 0.64616  | 1.697289 | 0.614317 | 0.311555 | 0.493438 |
| AC092162.1__lincRN | 1.39391  | 0        | 0.333822 | 0.09054  | 35.3643  | 208.562  | 0.133519 | 0.615806 | 0.121323 | -7.14196 | 0.988718 | 8.130675 | 0.337706 | 0.651225 | 0.335688 |
| AC092168.3__lincRN | 0        | 0        | 0.665369 | 0        | 0.629463 | 0.967422 | 0.323634 | 0        | 0        | -1.26303 | 1.039791 | 2.302825 | 0.229699 | 0.733342 | 0.38674  |
| AC092168.4__lincRN | 0        | 0        | 0        | 0        | 0        | 0.918796 | 0        | 0        | 0        | #NUM!    | #DIV/0!  | #DIV/0!  | 0.42265  | #DIV/0!  | 0.42265  |
| AC092295.4__antise | 0        | 0        | 0        | 0        | 5.10683  | 80.8629  | 0.856555 | 0        | 0        | #NUM!    | #NUM!    | 6.649139 | 0.387408 | 0.42265  | 0.393545 |
| AC092295.7__antise | 1.90124  | 2.87188  | 2.15362  | 1.42306  | 31.0887  | 31.5457  | 1.47799  | 3.54996  | 3.48135  | -3.20912 | -0.29686 | 2.912254 | 0.190505 | 0.410436 | 0.184347 |
| AC092299.6__pseud  | 0.039259 | 0.067013 | 0.217566 | 0.517808 | 0.315661 | 0.347008 | 0.214764 | 0.063043 | 0.202397 | -1.86602 | -0.56837 | 1.29765  | 0.108234 | 0.487651 | 0.037821 |
| AC092338.5__pseud  | 2.8677   | 13.775   | 1.23334  | 21.8519  | 20.5323  | 6.90736  | 14.6339  | 11.8882  | 8.98756  | -1.46331 | -0.99018 | 0.473129 | 0.133597 | 0.283916 | 0.305185 |
| AC092484.1__lincRN | 0.040516 | 0        | 0        | 0        | 77.8625  | 4.11632  | 0        | 0        | 0        | -10.9826 | #DIV/0!  | #DIV/0!  | 0.393275 | 0.42265  | 0.392975 |
| AC092570.2__lincRN | 0        | 0        | 0.736755 | 0        | 0        | 3.03739  | 0        | 0        | 0        | -2.04358 | #DIV/0!  | #DIV/0!  | 0.42265  | 0.42265  | 0.42265  |
| AC092573.2__pseud  | 18.226   | 27.669   | 12.9421  | 13.2146  | 8.48478  | 5.61291  | 13.4606  | 8.88774  | 5.28234  | 1.107176 | 1.090455 | -0.01672 | 0.138999 | 0.135271 | 0.681053 |
| AC092580.3__lincRN | 0        | 0        | 0.170713 | 0        | 0        | 0        | 0        | 0        | 0        | #DIV/0!  | #DIV/0!  | #DIV/0!  | 0.42265  | 0.42265  | #DIV/0!  |
| AC092580.4__lincRN | 2.50596  | 0.660599 | 0.544784 | 2.73698  | 0.753542 | 1554.35  | 0        | 10.7803  | 1.14883  | -8.71339 | -1.68448 | 7.028915 | 0.422529 | 0.545666 | 0.425372 |
| AC092594.1__lincRN | 3.07736  | 12.0467  | 3.78245  | 41.955   | 136.332  | 478.105  | 2.85081  | 63.8271  | 5.81526  | -5.1176  | -1.93896 | 3.178641 | 0.251735 | 0.402976 | 0.296829 |
| AC092619.1__lincRN | 0.904202 | 0.071934 | 0.278251 | 0.081008 | 9.28457  | 12.3513  | 0.025892 | 0        | 0.036973 | -4.11376 | 4.318596 | 8.432358 | 0.223213 | 0.247085 | 0.189362 |
| AC092620.3__lincRN | 0.052075 | 0.719923 | 0        | 0        | 0        | 0        | 0.050643 | 0        | 0.056209 | #DIV/0!  | 2.852985 | #NUM!    | 0.382501 | 0.468198 | 0.184609 |
| AC092625.1__lincRN | 0        | 0        | 0        | 0        | 0.230714 | 0        | 0        | 0        | 0        | #NUM!    | #DIV/0!  | #DIV/0!  | 0.42265  | #DIV/0!  | 0.42265  |
| AC092660.1__lincRN | 0        | 0        | 0        | 0        | 0.882035 | 2.52687  | 0.353108 | 0        | 0        | #NUM!    | #NUM!    | 3.271127 | 0.264631 | 0.42265  | 0.346467 |
| AC092661.1__lincRN | 0.054421 | 0.11979  | 0.076284 | 0        | 26.8237  | 131.998  | 0.09963  | 0        | 0        | -9.30841 | 1.330127 | 10.63854 | 0.319815 | 0.415579 | 0.319666 |
| AC092667.2__antise | 0        | 0        | 0        | 0        | 0.498909 | 2.17057  | 0        | 0        | 0        | #NUM!    | #DIV/0!  | #DIV/0!  | 0.30799  | #DIV/0!  | 0.30799  |
| AC092669.6__lincRN | 0        | 0        | 0        | 0        | 0        | 0        | 0.340033 | 0.039911 | 0.052967 | #DIV/0!  | #NUM!    | #NUM!    | #DIV/0!  | 0.278545 | 0.278545 |
| AC092687.3__lincRN | 0        | 0        | 0.554552 | 0        | 0.252912 | 1.85369  | 0        | 0        | 0        | -1.92552 | #DIV/0!  | #DIV/0!  | 0.322963 | 0.42265  | 0.349901 |
| AC092755.4__sense  | 21.3746  | 24.6331  | 1.49316  | 26.387   | 8.32964  | 97.1185  | 21.8355  | 13.5086  | 9.08716  | -1.47271 | 0.096379 | 1.569088 | 0.498733 | 0.868502 | 0.428515 |
| AC092839.3__antise | 0.293174 | 0.276793 | 0.876726 | 0.767732 | 0.061614 | 12.0881  | 0.569432 | 0.698891 | 0.884737 | -3.15849 | -0.57363 | 2.58486  | 0.409929 | 0.191679 | 0.446254 |
| AC093162.5__pseud  | 21.145   | 5.70474  | 11.2345  | 3.57397  | 4.26859  | 12.2339  | 0        | 9.88219  | 8.37929  | 0.923689 | 1.06039  | 0.136701 | 0.411211 | 0.473614 | 0.863744 |
| AC093326.2__lincRN | 0        | 0        | 0        | 0        | 0        | 6.38715  | 0        | 0.058665 | 0        | #NUM!    | #NUM!    | 6.766536 | 0.42265  | 0.42265  | 0.427977 |

|                    |          |          |          |          |          |          |          |          |          |          |          |          |          |          |          |
|--------------------|----------|----------|----------|----------|----------|----------|----------|----------|----------|----------|----------|----------|----------|----------|----------|
| AC093326.3__lincRN | 0.063074 | 0.024796 | 1.05648  | 0        | 1.21742  | 23.0318  | 0.349914 | 0.171296 | 0.159982 | -4.40534 | 0.748396 | 5.153733 | 0.393868 | 0.71929  | 0.405766 |
| AC093375.1__lincRN | 5.14977  | 4.60722  | 18.1245  | 4.95189  | 2.21933  | 11.4514  | 59.5714  | 14.5596  | 67.814   | 0.582252 | -2.34795 | -2.9302  | 0.24606  | 0.114413 | 0.103837 |
| AC093381.2__lincRN | 0        | 0        | 0.214262 | 0.093534 | 1.39027  | 4.85065  | 0.351907 | 0        | 0        | -4.88577 | -0.71582 | 4.169954 | 0.270128 | 0.807115 | 0.316382 |
| AC093388.3__antise | 1.0854   | 2.00092  | 1.3399   | 1.79973  | 56.1082  | 8.12688  | 1.45016  | 0        | 0.984925 | -3.89908 | 0.862103 | 4.761183 | 0.347775 | 0.443204 | 0.350813 |
| AC093390.1__antise | 0        | 0.060619 | 0.111573 | 0.148251 | 0.425366 | 6.05509  | 0.100932 | 0.056253 | 0.112088 | -5.26664 | -0.64505 | 4.621584 | 0.374189 | 0.445204 | 0.383402 |
| AC093391.2__antise | 0.656001 | 0        | 2.913    | 0.352051 | 2.23306  | 61.315   | 0.593764 | 0.43752  | 0.646903 | -4.16223 | 1.088617 | 5.250843 | 0.404023 | 0.527171 | 0.408127 |
| AC093415.2__proce  | 10.0792  | 5.41315  | 5.7614   | 6.55497  | 122.616  | 41.6074  | 16.4439  | 11.2611  | 9.3013   | -3.00634 | -0.80005 | 2.206282 | 0.295928 | 0.026277 | 0.336298 |
| AC093590.1__lincRN | 0        | 0        | 0.052183 | 0        | 38.6024  | 108.569  | 0.367389 | 0        | 0.04257  | -11.4616 | -2.97383 | 8.487803 | 0.262541 | 0.43795  | 0.264396 |
| AC093639.1__lincRN | 0        | 0        | 0        | 0        | 3.37373  | 6.54534  | 0        | 0        | 0        | #NUM!    | #DIV/0!  | #DIV/0!  | 0.222292 | #DIV/0!  | 0.222292 |
| AC093642.5__pseud  | 5.67611  | 19.3067  | 14.8472  | 12.6718  | 2.53797  | 39.7821  | 13.4737  | 1.9002   | 8.05022  | -0.46536 | 0.765861 | 1.231223 | 0.716273 | 0.532207 | 0.425935 |
| AC093642.6__lincRN | 0        | 0        | 0.247742 | 0        | 3.94456  | 162.996  | 0.059661 | 0        | 0.311785 | -9.39628 | -0.58431 | 8.811967 | 0.40883  | 0.184015 | 0.409036 |
| AC093690.1__antise | 0        | 0        | 0.014255 | 0        | 0.01522  | 8.73827  | 0        | 0.046689 | 0        | -9.26228 | -1.71166 | 7.55062  | 0.421643 | 0.6164   | 0.424733 |
| AC093702.1__lincRN | 0        | 0        | 0.247725 | 0        | 0        | 0        | 0        | 0        | 0        | #DIV/0!  | #DIV/0!  | #DIV/0!  | 0.42265  | 0.42265  | #DIV/0!  |
| AC093818.1__antise | 44.8972  | 73.2903  | 42.2776  | 30.3236  | 65.3479  | 153.5    | 128.354  | 57.0398  | 102.135  | -0.63488 | -0.84145 | -0.20657 | 0.544572 | 0.294483 | 0.800461 |
| AC093838.4__pseud  | 12.5241  | 6.7307   | 6.2722   | 5.63422  | 3.36165  | 19.1934  | 2.9433   | 7.06241  | 5.90464  | -0.14312 | 0.682058 | 0.825181 | 0.897706 | 0.421262 | 0.495588 |
| AC093843.1__lincRN | 0        | 0        | 0        | 0        | 0        | 0        | 0        | 0        | 0        | #DIV/0!  | #DIV/0!  | #DIV/0!  | #DIV/0!  | #DIV/0!  | #DIV/0!  |
| AC093901.1__lincRN | 0.914777 | 3.367    | 2.31293  | 1.85198  | 4.914    | 26.6948  | 1.4299   | 1.20668  | 0.676919 | -2.34309 | 0.992953 | 3.336044 | 0.365568 | 0.313227 | 0.337791 |
| AC093911.1__lincRN | 0        | 0        | 0.68119  | 0        | 0        | 44.6309  | 2.7174   | 0        | 0        | -6.03384 | -1.9961  | 4.037744 | 0.42265  | 0.580362 | 0.458805 |
| AC096554.1__lincRN | 0        | 0        | 0        | 0.472412 | 386.031  | 4.10098  | 0        | 0        | 0        | #NUM!    | #DIV/0!  | #DIV/0!  | 0.415843 | #DIV/0!  | 0.415843 |
| AC096559.1__lincRN | 0.471869 | 0.584415 | 1.42164  | 1.67224  | 60.4742  | 200.477  | 1.99605  | 0.430887 | 5.75264  | -6.72772 | -1.72289 | 5.004826 | 0.277468 | 0.283436 | 0.279079 |
| AC096559.2__lincRN | 0        | 0        | 0        | 2.00032  | 3.99559  | 3.32817  | 0.945873 | 0        | 0        | #NUM!    | #NUM!    | 3.301243 | 0.033804 | 0.42265  | 0.088355 |
| AC096574.4__proce  | 1.34364  | 1.85331  | 3.04358  | 0.452533 | 2.86205  | 8.50397  | 0.28973  | 3.42926  | 1.65797  | -0.92131 | 0.214878 | 1.136191 | 0.427353 | 0.787679 | 0.458762 |
| AC096574.5__lincRN | 0        | 0.034425 | 0.16073  | 0.058164 | 5.96595  | 1.83811  | 0.200333 | 0.12762  | 0.06356  | -5.33224 | -1.00444 | 4.327806 | 0.281913 | 0.530323 | 0.293346 |
| AC096579.13__proc  | 0.156538 | 0.458815 | 1.66746  | 0.38132  | 0.12241  | 2.62776  | 0.827518 | 0.251745 | 1.15578  | -0.45604 | 0.03051  | 0.486547 | 0.529789 | 0.968257 | 0.664692 |
| AC096655.2__lincRN | 0        | 0        | 0        | 0.116809 | 0        | 1.27813  | 0.038058 | 0        | 0.021129 | #NUM!    | #NUM!    | 4.558788 | 0.3725   | 0.214982 | 0.387679 |
| AC096669.1__lincRN | 0        | 0        | 0.385782 | 0        | 1.68641  | 12.5965  | 0.537136 | 0.239713 | 0.119228 | -5.21036 | -1.21584 | 3.994523 | 0.349091 | 0.543776 | 0.385246 |
| AC096669.2__lincRN | 0        | 0        | 1.19498  | 0        | 3.66293  | 19.0677  | 1.33736  | 0        | 0        | -4.24958 | -0.1624  | 4.087178 | 0.31849  | 0.954165 | 0.365369 |
| AC096669.3__lincRN | 0        | 0        | 0.900659 | 0        | 1.81238  | 0.96057  | 1.23493  | 0        | 0.195321 | -1.62237 | -0.66722 | 0.955153 | 0.40389  | 0.785004 | 0.666261 |
| AC096670.3__antise | 0.067824 | 0.034275 | 1.04125  | 0.077345 | 1.89204  | 0.228279 | 0.745683 | 0        | 2.61233  | -0.94271 | -1.55434 | -0.61164 | 0.69983  | 0.25288  | 0.785012 |
| AC097374.2__pseud  | 1.64174  | 0.167452 | 1.70927  | 2.29372  | 25.8072  | 33.5007  | 1.08029  | 0.123977 | 0.073249 | -4.12995 | 1.461603 | 5.591555 | 0.179036 | 0.25223  | 0.174145 |
| AC097467.2__antise | 1.2811   | 1.32416  | 0.564437 | 0.647249 | 5.86068  | 36.4713  | 0.374793 | 1.70249  | 0.596447 | -3.76122 | 0.245491 | 4.006714 | 0.365044 | 0.70859  | 0.355677 |
| AC097468.4__antise | 0        | 0        | 0        | 0        | 6.56919  | 6.92982  | 1.22421  | 0        | 0.307634 | #NUM!    | #NUM!    | 3.139512 | 0.183795 | 0.29935  | 0.265582 |
| AC097468.7__antise | 0.107582 | 0.070478 | 0.624929 | 0.09535  | 12.7412  | 17.6396  | 0.361701 | 0.039213 | 0.104167 | -5.24616 | 0.668866 | 5.915023 | 0.19244  | 0.703606 | 0.200902 |
| AC097495.2__antise | 0        | 0        | 0.258632 | 0        | 0        | 0        | 0        | 0        | 0.349262 | #DIV/0!  | -0.43341 | #NUM!    | 0.42265  | 0.42265  | 0.42265  |
| AC097495.3__lincRN | 0.031979 | 0        | 13.3681  | 0.168945 | 1.29055  | 1.96308  | 0.218638 | 0.069664 | 0.277405 | 1.969087 | 4.566043 | 2.596955 | 0.498153 | 0.43402  | 0.207757 |

|                    |          |          |          |          |          |          |          |          |          |          |          |          |          |          |          |
|--------------------|----------|----------|----------|----------|----------|----------|----------|----------|----------|----------|----------|----------|----------|----------|----------|
| AC097499.1__lincRN | 0        | 0        | 0        | 4.49302  | 11.7084  | 95.6924  | 1.04299  | 0        | 0        | #NUM!    | #NUM!    | 6.745261 | 0.330624 | 0.42265  | 0.336568 |
| AC097532.2__lincRN | 0        | 0        | 0.99988  | 0        | 1.61667  | 11.0783  | 3.71568  | 0        | 0        | -3.66636 | -1.8938  | 1.772559 | 0.338494 | 0.592509 | 0.560517 |
| AC097533.1__pseud  | 3.42718  | 2.66485  | 1.73469  | 0.491608 | 0.39155  | 2.98111  | 1.57178  | 2.79265  | 2.70045  | 1.018213 | 0.147743 | -0.87047 | 0.415877 | 0.790108 | 0.302109 |
| AC097662.2__antise | 30.7517  | 17.3492  | 15.8358  | 1.43998  | 38.9007  | 15.6723  | 0.090626 | 16.1925  | 0        | 0.190883 | 1.973267 | 1.782383 | 0.874259 | 0.203184 | 0.169644 |
| AC097713.3__lincRN | 0        | 0        | 2.16053  | 0        | 8.39147  | 398.421  | 0.04924  | 0.036597 | 0        | -7.55683 | 4.65365  | 12.21049 | 0.410556 | 0.445811 | 0.410744 |
| AC097721.2__lincRN | 7.94801  | 9.88354  | 7.4783   | 17.7346  | 7.37393  | 31.9494  | 3.27893  | 6.79924  | 5.00341  | -1.17273 | 0.746911 | 1.91964  | 0.30765  | 0.034875 | 0.207591 |
| AC097724.3__antise | 0        | 0.113768 | 0.865876 | 0        | 0.871538 | 10.6586  | 0.287191 | 0.104689 | 0.362715 | -3.55701 | 0.376555 | 3.933563 | 0.379828 | 0.775756 | 0.397655 |
| AC098617.1__antise | 3.82869  | 1.21871  | 2.77713  | 1.13621  | 16.5406  | 106.237  | 1.1368   | 2.58618  | 2.19446  | -3.98519 | 0.403031 | 4.38822  | 0.359374 | 0.641934 | 0.351029 |
| AC098817.5__pseud  | 0        | 0        | 0.067788 | 0        | 0        | 0.450461 | 0.165585 | 0        | 0        | -2.7323  | -1.28847 | 1.44383  | 0.42265  | 0.684429 | 0.657298 |
| AC098820.2__antise | 0        | 0        | 0        | 0        | 22.2019  | 105.531  | 1.07989  | 0        | 0        | #NUM!    | #NUM!    | 6.886102 | 0.316155 | 0.42265  | 0.321971 |
| AC098823.3__lincRN | 0.045312 | 0.066789 | 0.351654 | 0.195821 | 0.545502 | 0.141123 | 0.839843 | 0.037165 | 0.09873  | -0.92814 | -1.07313 | -0.14499 | 0.555796 | 0.645716 | 0.934439 |
| AC098828.2__lincRN | 0        | 0        | 0.649827 | 1.27013  | 10.3683  | 30.778   | 0.805532 | 0        | 0        | -6.02842 | -0.30989 | 5.718537 | 0.243784 | 0.913141 | 0.260361 |
| AC098872.3__antise | 0        | 0.106242 | 0.224692 | 0        | 9.04199  | 2.43251  | 0        | 0.146744 | 0.243373 | -5.11574 | -0.23736 | 4.878381 | 0.301019 | 0.233916 | 0.301407 |
| AC098973.2__lincRN | 0        | 2.10021  | 1.02339  | 9.41927  | 55.8989  | 13.0955  | 1.07285  | 0.023244 | 0.199451 | -4.64982 | 1.269651 | 5.919475 | 0.222875 | 0.574191 | 0.231663 |
| AC099344.2__lincRN | 0        | 0        | 0.168599 | 0        | 4.68023  | 1.9679   | 0.757089 | 0        | 0.066048 | -5.30128 | -2.28754 | 3.013744 | 0.253925 | 0.505372 | 0.341648 |
| AC099344.3__lincRN | 0        | 0        | 0        | 0        | 2.25031  | 15.0513  | 0        | 0        | 0        | #NUM!    | #DIV/0!  | #DIV/0!  | 0.343626 | #DIV/0!  | 0.343626 |
| AC099522.1__pseud  | 0.159185 | 0.569852 | 0.157799 | 0        | 0.398578 | 3.64342  | 0.02576  | 0.114868 | 0.486302 | -2.18833 | 0.500363 | 2.688692 | 0.478558 | 0.739857 | 0.378005 |
| AC099684.1__antise | 0.034837 | 0.082167 | 0.215101 | 0.161808 | 0        | 185.81   | 0.102396 | 0        | 0.151601 | -9.12923 | 0.386828 | 9.516057 | 0.422511 | 0.635992 | 0.422465 |
| AC099754.1__lincRN | 0        | 0        | 0.089447 | 0        | 0.742485 | 13.9309  | 0        | 0        | 0        | -7.35796 | #DIV/0!  | #DIV/0!  | 0.392553 | 0.42265  | 0.39274  |
| AC100830.3__antise | 10.8727  | 5.40749  | 4.51094  | 3.47316  | 3.60986  | 3.3914   | 1.83785  | 6.95595  | 5.59935  | 0.989098 | 0.530586 | -0.45851 | 0.226108 | 0.599839 | 0.477441 |
| AC103881.1__lincRN | 0        | 0        | 0        | 0        | 0        | 7.96327  | 0        | 0        | 0        | #NUM!    | #DIV/0!  | #DIV/0!  | 0.42265  | #DIV/0!  | 0.42265  |
| AC103965.1__pseud  | 1.95954  | 1.6221   | 5.30109  | 3.26723  | 0.969799 | 33.9793  | 0.88265  | 1.75623  | 7.87012  | -2.10511 | -0.24255 | 1.862564 | 0.410221 | 0.663326 | 0.390124 |
| AC104024.1__lincRN | 0.040724 | 0.016008 | 0.135904 | 0        | 0.130623 | 0.462571 | 0.093176 | 0.059355 | 0        | -1.62263 | 0.33677  | 1.959401 | 0.336554 | 0.847656 | 0.46687  |
| AC104088.1__lincRN | 0.332777 | 0.305341 | 4.08455  | 0        | 0.136577 | 2.61204  | 1.17811  | 0.31566  | 0.594696 | 0.780896 | 1.177158 | 0.396262 | 0.249715 | 0.576456 | 0.83733  |
| AC104134.2__antise | 0        | 0        | 0        | 0        | 9.45354  | 51.2381  | 0.776006 | 0        | 0        | #NUM!    | #NUM!    | 6.289286 | 0.327478 | 0.42265  | 0.336151 |
| AC104135.3__lincRN | 1.61129  | 2.50993  | 0        | 5.21834  | 4.74866  | 5.40063  | 0.424559 | 0        | 1.60701  | -1.89875 | 1.020477 | 2.919228 | 0.054785 | 0.623908 | 0.005339 |
| AC104389.16__antis | 0        | 0        | 0        | 0        | 0        | 0        | 0.071464 | 0        | 0        | #DIV/0!  | #NUM!    | #NUM!    | #DIV/0!  | 0.42265  | 0.42265  |
| AC104389.28__proc  | 0        | 0.201096 | 1.6152   | 0.429665 | 57.3986  | 27.2194  | 0.50988  | 0.151095 | 0.098645 | -5.5492  | 1.25765  | 6.806851 | 0.233206 | 0.618885 | 0.231789 |
| AC104532.4__antise | 1.64806  | 1.10003  | 1.08629  | 2.40354  | 7.60411  | 36.728   | 0.565719 | 0.908169 | 19.7672  | -3.60746 | -2.46979 | 1.137666 | 0.316493 | 0.462959 | 0.196856 |
| AC104623.2__antise | 0        | 0        | 0        | 0.45345  | 0        | 0        | 0        | 0        | 0        | #NUM!    | #DIV/0!  | #DIV/0!  | 0.42265  | #DIV/0!  | 0.42265  |
| AC104653.1__lincRN | 0        | 0.102632 | 0.827868 | 1.91723  | 0.090361 | 2.12704  | 0.723518 | 0        | 0        | -2.15168 | 0.362977 | 2.514658 | 0.201243 | 0.891781 | 0.193124 |
| AC104654.1__lincRN | 0.138016 | 0        | 0.975017 | 0.134562 | 2.27399  | 248.682  | 1.78189  | 0.095488 | 0        | -7.81757 | -0.75422 | 7.063345 | 0.417382 | 0.769398 | 0.421451 |
| AC104655.2__antise | 0.062808 | 0.111131 | 0.858351 | 0.124453 | 1.25007  | 2.27266  | 1.95806  | 0        | 0        | -1.82093 | -0.92358 | 0.897358 | 0.16909  | 0.743467 | 0.692985 |
| AC104655.3__lincRN | 0.075217 | 0        | 0.524008 | 0.056262 | 0.078541 | 1.05065  | 0.145579 | 0        | 0        | -0.98427 | 2.041295 | 3.025564 | 0.364759 | 0.504621 | 0.432198 |
| AC104695.3__antise | 0.030958 | 0.12557  | 0.505638 | 0.176068 | 32.2424  | 10.3263  | 0.312299 | 0.05804  | 0.144473 | -6.01241 | 0.363148 | 6.375559 | 0.276571 | 0.81616  | 0.277731 |



|                    |          |          |          |          |          |          |          |          |          |          |          |          |          |          |          |
|--------------------|----------|----------|----------|----------|----------|----------|----------|----------|----------|----------|----------|----------|----------|----------|----------|
| AC104695.4__lincRN | 0        | 0        | 0.276802 | 0        | 0        | 43.9184  | 0        | 0        | 0.085722 | -7.30983 | 1.691112 | 9.000939 | 0.42265  | 0.42265  | 0.42265  |
| AC104777.2__lincRN | 0        | 0        | 1.60181  | 0        | 0.075193 | 17.6396  | 0.211538 | 0        | 0.012759 | -3.46718 | 2.836218 | 6.303398 | 0.419949 | 0.503885 | 0.427162 |
| AC104777.4__lincRN | 0        | 0        | 3.5711   | 0        | 67.5734  | 0        | 0        | 0        | 0.070826 | -4.24202 | 5.655956 | 9.897971 | 0.453923 | 0.42265  | 0.423255 |
| AC104782.3__lincRN | 0        | 0.172919 | 1.22201  | 0.025012 | 3.13888  | 3.59403  | 0.083021 | 0.020565 | 0.092197 | -2.27639 | 2.832861 | 5.109249 | 0.184727 | 0.39432  | 0.192075 |
| AC104801.1__lincRN | 0.025855 | 0.106709 | 0.311456 | 0.068723 | 2.10436  | 0.915458 | 0.076068 | 0.070666 | 0.084471 | -2.79823 | 0.941454 | 3.739684 | 0.268559 | 0.477709 | 0.249096 |
| AC104809.2__antise | 0.03806  | 0.119681 | 0.177834 | 0.067449 | 1.4625   | 0.15795  | 0.09954  | 0        | 0.055268 | -2.33052 | 1.116154 | 3.446676 | 0.418766 | 0.426576 | 0.396414 |
| AC104809.4__proce  | 0.091939 | 0        | 0.459891 | 1.77095  | 4.85476  | 2.4447   | 0.064401 | 0        | 1.09029  | -4.03887 | -1.06521 | 2.973662 | 0.10692  | 0.448397 | 0.141148 |
| AC104820.2__lincRN | 7.86407  | 0        | 1.46519  | 32.0921  | 546.349  | 54.9303  | 0.844244 | 9.2319   | 0        | -6.08515 | -0.11111 | 5.974036 | 0.344321 | 0.963112 | 0.334606 |
| AC105253.1__lincRN | 0        | 0.0243   | 0.139248 | 0.027444 | 0.088368 | 0.151719 | 0.108204 | 0        | 0.007492 | -0.70999 | 0.499375 | 1.20937  | 0.152118 | 0.839577 | 0.532311 |
| AC105339.1__lincRN | 0        | 0.027156 | 0.203803 | 0.199439 | 0.616065 | 0.411477 | 0.079073 | 0.062962 | 0.050177 | -2.4094  | 0.264942 | 2.674345 | 0.122764 | 0.873218 | 0.11035  |
| AC105344.2__lincRN | 0.142228 | 0.090726 | 0.307232 | 0.196274 | 3.07124  | 67.7692  | 0.150015 | 0.172644 | 0.128015 | -7.03897 | 0.261372 | 7.300337 | 0.397268 | 0.73794  | 0.398067 |
| AC105393.1__lincRN | 0        | 0        | 0.13724  | 0.257498 | 3.28181  | 53.9086  | 0.200318 | 0        | 0        | -8.70941 | -0.54559 | 8.163818 | 0.385798 | 0.850021 | 0.388023 |
| AC105398.3__antise | 0        | 0        | 0        | 0        | 0        | 6.62139  | 0        | 0        | 0        | #NUM!    | #DIV/0!  | #DIV/0!  | 0.42265  | #DIV/0!  | 0.42265  |
| AC105402.4__antise | 0        | 0.0384   | 39.0952  | 0        | 1.53257  | 220.927  | 0.688319 | 0        | 0.035435 | -2.50706 | 5.756765 | 8.263828 | 0.417925 | 0.432345 | 0.42046  |
| AC105760.2__antise | 9.57627  | 9.65706  | 7.40735  | 3.71926  | 5.25401  | 8.79704  | 3.11563  | 9.19143  | 10.0831  | 0.584162 | 0.250766 | -0.3334  | 0.313319 | 0.649838 | 0.362793 |
| AC106053.1__lincRN | 1.36947  | 0        | 0        | 3.41359  | 1.615    | 3.56664  | 0        | 0        | 0        | -2.64992 | #DIV/0!  | #DIV/0!  | 0.055458 | 0.42265  | 0.044651 |
| AC106706.1__lincRN | 0        | 0        | 0.404774 | 0        | 1.10616  | 8.23814  | 0        | 0        | 0        | -4.5289  | #DIV/0!  | #DIV/0!  | 0.347594 | 0.42265  | 0.350952 |
| AC106869.2__lincRN | 0        | 0        | 0.754819 | 2.12546  | 4.51173  | 24.5301  | 1.24485  | 0        | 0        | -5.36776 | -0.72177 | 4.645989 | 0.277206 | 0.805663 | 0.307783 |
| AC107057.1__lincRN | 1.23985  | 0        | 0        | 0.201959 | 4.34593  | 4.0963   | 0        | 0        | 0        | -2.80157 | #DIV/0!  | #DIV/0!  | 0.294767 | 0.42265  | 0.164813 |
| AC107057.2__antise | 0        | 0        | 2.11527  | 4.07164  | 5.99339  | 48.3233  | 1.22969  | 0.019038 | 0        | -4.78677 | 0.760382 | 5.547149 | 0.305379 | 0.79553  | 0.323625 |
| AC107070.1__lincRN | 0        | 0        | 0.18781  | 0.065724 | 0.253748 | 2.95439  | 0.181858 | 0        | 0        | -4.12365 | 0.046461 | 4.170109 | 0.358851 | 0.986855 | 0.398435 |
| AC107218.3__antise | 0        | 0        | 0.657204 | 0        | 13.3016  | 131.998  | 0.843143 | 0        | 0        | -7.78847 | -0.35944 | 7.429038 | 0.367414 | 0.899579 | 0.371354 |
| AC107399.2__lincRN | 0.879093 | 5.59247  | 4.86968  | 0.547119 | 6.97594  | 2.48342  | 0.597337 | 3.44716  | 5.15994  | 0.180644 | 0.301177 | 0.120533 | 0.722617 | 0.434897 | 0.895455 |
| AC107622.1__lincRN | 0.073597 | 0.052074 | 0.336696 | 0.039102 | 1.91461  | 10.6637  | 0.891315 | 0.442382 | 0.393636 | -4.77024 | -1.90144 | 2.868798 | 0.331243 | 0.195567 | 0.396024 |
| AC108004.2__lincRN | 0        | 0        | 0        | 0        | 6.01744  | 12.5966  | 0.380679 | 0        | 0.093903 | #NUM!    | #NUM!    | 5.293591 | 0.230175 | 0.30118  | 0.245508 |
| AC108004.3__antise | 0.543617 | 0.310827 | 1.05522  | 0.360819 | 9.90407  | 54.7378  | 1.46561  | 2.12667  | 0.268884 | -5.08911 | -1.01572 | 4.073392 | 0.332027 | 0.483886 | 0.358559 |
| AC108051.1__lincRN | 0        | 0.978867 | 0        | 0        | 5.19059  | 3.23948  | 0        | 0        | 0        | -3.10636 | #DIV/0!  | #DIV/0!  | 0.190366 | 0.42265  | 0.204531 |
| AC108051.2__lincRN | 0        | 0.325342 | 0.20586  | 0        | 3.57382  | 0        | 0        | 0        | 0        | -2.75013 | #DIV/0!  | #DIV/0!  | 0.46032  | 0.203406 | 0.42265  |
| AC108051.3__lincRN | 0        | 2.17198  | 0        | 0        | 0        | 0        | 0        | 0        | 0        | #DIV/0!  | #DIV/0!  | #DIV/0!  | 0.42265  | 0.42265  | #DIV/0!  |
| AC108056.1__lincRN | 0        | 0.190425 | 0        | 0.209695 | 3.34679  | 0        | 0.077955 | 0        | 0        | -4.22316 | 1.288515 | 5.511672 | 0.385647 | 0.68442  | 0.400388 |
| AC108066.1__lincRN | 0        | 0.034003 | 0        | 0        | 0.842483 | 24.1474  | 0.779026 | 0.4012   | 0.052382 | -9.52145 | -5.17989 | 4.341559 | 0.403654 | 0.197962 | 0.431135 |
| AC108142.1__antise | 0.054526 | 0.207124 | 0.97742  | 0.368265 | 9.86213  | 73.2715  | 0        | 0.201331 | 0.131613 | -6.07448 | 1.895906 | 7.970386 | 0.348826 | 0.382771 | 0.349144 |
| AC108448.3__antise | 0        | 0        | 0        | 14.2207  | 3.01238  | 4.01022  | 0        | 0        | 0        | #NUM!    | #DIV/0!  | #DIV/0!  | 0.186644 | #DIV/0!  | 0.186644 |
| AC108488.3__antise | 2.17806  | 0        | 0        | 0.748091 | 1.03254  | 2.31335  | 1.98226  | 1.26412  | 0        | -0.91046 | -0.57579 | 0.334673 | 0.619752 | 0.517825 | 0.814085 |
| AC108868.5__lincRN | 0        | 0        | 0.758537 | 0        | 2.37433  | 0.965203 | 1.00484  | 0        | 0.14641  | -2.13835 | -0.60191 | 1.536445 | 0.37476  | 0.807299 | 0.532954 |

|                    |          |          |          |          |          |          |          |          |          |          |          |          |          |          |          |
|--------------------|----------|----------|----------|----------|----------|----------|----------|----------|----------|----------|----------|----------|----------|----------|----------|
| AC108868.6__lincRN | 0        | 0.179523 | 0        | 0        | 0.882463 | 0        | 0.294278 | 0        | 0.151125 | -2.29737 | -1.31094 | 0.986425 | 0.42265  | 0.592159 | 0.73225  |
| AC109309.4__antise | 0        | 0        | 1.27564  | 0.248073 | 0.438701 | 3.81626  | 0.071132 | 0.026438 | 0        | -1.81968 | 3.708637 | 5.528313 | 0.2806   | 0.467751 | 0.338069 |
| AC109589.1__lincRN | 0        | 0        | 0.499521 | 0        | 0        | 8.96811  | 0        | 0        | 0.160256 | -4.16619 | 1.640167 | 5.806354 | 0.42265  | 0.42265  | 0.42265  |
| AC109826.1__lincRN | 0.320953 | 0.095102 | 1.39372  | 0.227374 | 3.13665  | 1.16414  | 0.643996 | 0.17607  | 0.445648 | -1.32312 | 0.515859 | 1.838975 | 0.485698 | 0.687407 | 0.387429 |
| AC109828.1__antise | 0        | 0        | 0        | 0        | 5.59297  | 0        | 0        | 0        | 0        | #NUM!    | #DIV/0!  | #DIV/0!  | 0.42265  | #DIV/0!  | 0.42265  |
| AC112198.1__pseud  | 0.137353 | 0.093855 | 0.325939 | 0.045317 | 10.6731  | 4.20441  | 0.654987 | 0.186922 | 0.213199 | -4.74332 | -0.92126 | 3.822058 | 0.263941 | 0.4655   | 0.28746  |
| AC112229.7__lincRN | 11.8518  | 52.0234  | 29.7365  | 10.3291  | 2.60447  | 5.71602  | 12.3393  | 6.78604  | 6.01937  | 2.327545 | 1.896434 | -0.43111 | 0.212651 | 0.226126 | 0.193482 |
| AC112518.3__lincRN | 0.064753 | 0        | 0        | 0        | 1.97075  | 0        | 0        | 0        | 0        | -4.92766 | #DIV/0!  | #DIV/0!  | 0.441921 | 0.42265  | 0.42265  |
| AC113167.1__lincRN | 0        | 0        | 0.315991 | 0        | 4.97087  | 0.059376 | 0        | 0        | 0.204866 | -3.99267 | 0.625203 | 4.617876 | 0.453183 | 0.42265  | 0.439788 |
| AC113167.2__lincRN | 0        | 0        | 0        | 0.256763 | 0        | 1.96347  | 0        | 0        | 0        | #NUM!    | #DIV/0!  | #DIV/0!  | 0.352661 | #DIV/0!  | 0.352661 |
| AC113607.1__lincRN | 0.060874 | 0.047827 | 0.416308 | 1.4531   | 2.51285  | 12.3699  | 0.158833 | 0.07676  | 0        | -4.95955 | 1.156046 | 6.1156   | 0.256903 | 0.610189 | 0.266556 |
| AC113607.2__lincRN | 0        | 0        | 0.59065  | 0        | 0        | 37.2812  | 0        | 0        | 0        | -5.98    | #DIV/0!  | #DIV/0!  | 0.42265  | 0.42265  | 0.42265  |
| AC113607.3__antise | 0        | 0        | 0.730347 | 0        | 2.17354  | 6.91815  | 0.182564 | 0        | 0        | -3.63789 | 2.00018  | 5.638074 | 0.263938 | 0.579895 | 0.290903 |
| AC113608.1__lincRN | 0        | 0.096046 | 0.404581 | 0        | 2.16332  | 28.7267  | 0        | 0        | 0        | -5.94726 | #DIV/0!  | #DIV/0!  | 0.382152 | 0.304907 | 0.380924 |
| AC114730.2__antise | 0        | 0        | 0.325545 | 0        | 2.84369  | 0.733559 | 0.126765 | 0.07073  | 0        | -3.45792 | 0.721045 | 4.178966 | 0.346504 | 0.79259  | 0.320376 |
| AC114730.3__antise | 0        | 0        | 0        | 0        | 0        | 0        | 0.177959 | 0        | 0        | #DIV/0!  | #NUM!    | #NUM!    | #DIV/0!  | 0.42265  | 0.42265  |
| AC114776.3__lincRN | 0.013141 | 0        | 0.151401 | 0.043754 | 92.1606  | 0.378614 | 0.129053 | 0.014385 | 0.042997 | -9.13615 | -0.18021 | 8.955936 | 0.421036 | 0.920684 | 0.421085 |
| AC114788.2__lincRN | 0        | 0        | 0.10913  | 0.077781 | 10.1008  | 0.296401 | 0.073756 | 0        | 0.027303 | -6.58476 | 0.110847 | 6.695603 | 0.407619 | 0.957701 | 0.407249 |
| AC114812.5__pseud  | 0        | 0        | 0.146005 | 0        | 0.396014 | 0.122934 | 0        | 0.039764 | 0        | -1.82957 | 1.876476 | 3.706048 | 0.457205 | 0.594654 | 0.265898 |
| AC114813.1__lincRN | 0        | 0        | 0        | 0        | 2.27818  | 0.913257 | 0        | 0        | 0        | #NUM!    | #DIV/0!  | #DIV/0!  | 0.24928  | #DIV/0!  | 0.24928  |
| AC114814.3__lincRN | 0        | 0        | 0        | 0        | 2.67151  | 21.9843  | 0.104564 | 0        | 0        | #NUM!    | #NUM!    | 7.881398 | 0.357219 | 0.42265  | 0.359952 |
| AC114814.4__lincRN | 0        | 0        | 0.101806 | 0        | 0        | 1.12592  | 0        | 0        | 0        | -3.46721 | #DIV/0!  | #DIV/0!  | 0.42265  | 0.42265  | 0.42265  |
| AC116609.1__lincRN | 0        | 0.268967 | 0        | 0        | 0        | 5.14725  | 0        | 0        | 0        | -4.2583  | #DIV/0!  | #DIV/0!  | 0.453564 | 0.42265  | 0.42265  |
| AC116609.3__lincRN | 0.383687 | 0.061783 | 0        | 0.154129 | 12.0587  | 0.423809 | 0        | 0.02856  | 0        | -4.82614 | 3.963287 | 8.789426 | 0.413774 | 0.374995 | 0.395338 |
| AC118345.1__lincRN | 0        | 0        | 0        | 0        | 0        | 2.10271  | 0        | 0        | 0        | #NUM!    | #DIV/0!  | #DIV/0!  | 0.42265  | #DIV/0!  | 0.42265  |
| AC118653.2__lincRN | 0        | 0        | 0        | 0        | 0.140207 | 1.16158  | 0.466579 | 0        | 0.103511 | #NUM!    | #NUM!    | 1.191232 | 0.357624 | 0.311308 | 0.637338 |
| AC122136.2__lincRN | 0        | 0        | 0        | 0        | 3.60362  | 0        | 0        | 0        | 0        | #NUM!    | #DIV/0!  | #DIV/0!  | 0.42265  | #DIV/0!  | 0.42265  |
| AC124057.5__antise | 2.96657  | 1.05477  | 2.22574  | 0.814478 | 0.534696 | 0.915378 | 0.735977 | 2.19016  | 2.31671  | 1.463956 | 0.252832 | -1.21112 | 0.106281 | 0.768507 | 0.207726 |
| AC124861.1__lincRN | 0        | 0        | 3.2658   | 1.81544  | 14.7479  | 37.9507  | 0        | 0        | 0        | -4.06112 | #DIV/0!  | #DIV/0!  | 0.21587  | 0.42265  | 0.227753 |
| AC124997.1__lincRN | 0.535584 | 0        | 10.827   | 2.97046  | 16.2527  | 337.008  | 2.25855  | 0.31535  | 0.01296  | -4.97045 | 2.135017 | 7.105468 | 0.390345 | 0.537501 | 0.394803 |
| AC128709.3__lincRN | 0        | 0        | 0        | 0        | 7.99012  | 0.692899 | 0.224974 | 0.439278 | 0.290036 | #NUM!    | #NUM!    | 3.1857   | 0.374928 | 0.037544 | 0.410148 |
| AC128709.4__lincRN | 0        | 0        | 0.827486 | 0        | 3.8902   | 1.70709  | 0        | 0        | 0        | -2.75792 | #DIV/0!  | #DIV/0!  | 0.309536 | 0.42265  | 0.239315 |
| AC129929.5__proce  | 34.4627  | 13.3859  | 24.9406  | 19.2318  | 14.4124  | 13.9619  | 8.66779  | 24.6446  | 33.9396  | 0.612578 | 0.114147 | -0.49843 | 0.226762 | 0.891808 | 0.542774 |
| AC131097.3__antise | 0.581073 | 0.792921 | 3.36476  | 7.02148  | 8.37634  | 404.41   | 0.666275 | 1.02797  | 1.7968   | -6.46908 | 0.440849 | 6.909926 | 0.402645 | 0.546303 | 0.403172 |
| AC131180.1__pseud  | 1.5812   | 1.67822  | 4.40729  | 2.53904  | 3.37045  | 9.57749  | 0.795191 | 2.6401   | 2.78776  | -1.01438 | 0.300986 | 1.315362 | 0.182618 | 0.591634 | 0.241132 |

|                    |          |          |          |          |          |          |          |          |          |          |          |          |          |          |          |
|--------------------|----------|----------|----------|----------|----------|----------|----------|----------|----------|----------|----------|----------|----------|----------|----------|
| AC131180.4__pseud  | 0        | 0.180642 | 0        | 0.094859 | 2.9538   | 0.700266 | 0.218678 | 0        | 0        | -4.37527 | -0.27567 | 4.099597 | 0.280116 | 0.922578 | 0.329145 |
| AC133785.1__antise | 0.045568 | 0.012286 | 0        | 0.361164 | 5.25333  | 1.92897  | 0.204477 | 0.211212 | 0.181659 | -7.02665 | -3.36807 | 3.658584 | 0.227372 | 0.004127 | 0.248802 |
| AC136289.1__pseud  | 1.10253  | 1.34073  | 0.934573 | 1.49592  | 13.3016  | 27.1076  | 3.6498   | 0        | 0.780998 | -3.63296 | -0.39147 | 3.241488 | 0.227091 | 0.789108 | 0.268435 |
| AC137932.6__antise | 0        | 0        | 0.131686 | 0.069703 | 0.168134 | 40.2585  | 0.077269 | 0        | 0.08579  | -8.26455 | -0.3083  | 7.956249 | 0.419234 | 0.798452 | 0.420347 |
| AC138430.4__proce  | 0.271077 | 0.01998  | 1.4747   | 1.68554  | 4.98793  | 4.08401  | 1.5628   | 0.227616 | 0.136007 | -2.60698 | -0.12564 | 2.481344 | 0.10293  | 0.950444 | 0.175737 |
| AC138655.6__antise | 0.030089 | 15.6379  | 0.060239 | 93.7852  | 0        | 6.42067  | 4.87071  | 0        | 0.163762 | -2.67154 | 1.643444 | 4.314983 | 0.488015 | 0.622851 | 0.383546 |
| AC139099.5__lincRN | 0        | 0.083754 | 0.256182 | 0        | 0.606888 | 0.769516 | 0.847356 | 0        | 0.195922 | -2.01757 | -1.61779 | 0.39978  | 0.18354  | 0.524288 | 0.838334 |
| AC139100.3__antise | 0        | 0        | 0        | 2.03438  | 4.27104  | 0        | 0        | 0        | 0        | #NUM!    | #DIV/0!  | #DIV/0!  | 0.230482 | #DIV/0!  | 0.230482 |
| AC139712.4__lincRN | 0        | 0        | 0        | 0        | 0.533709 | 0        | 0        | 0        | 0        | #NUM!    | #DIV/0!  | #DIV/0!  | 0.42265  | #DIV/0!  | 0.42265  |
| AC140481.1__pseud  | 0.181771 | 0.19091  | 0.291476 | 0.057774 | 0.195239 | 106.237  | 0.2001   | 0.164525 | 0        | -7.32498 | 0.865111 | 8.190089 | 0.423302 | 0.410264 | 0.423257 |
| AC140481.8__antise | 0.023169 | 0.865034 | 0.065006 | 0.043228 | 14.2549  | 7.8471   | 0.059184 | 0.045669 | 0.025281 | -4.53806 | 2.8728   | 7.410858 | 0.209973 | 0.421273 | 0.216366 |
| AC141928.1__lincRN | 0.105518 | 0.112734 | 0.044702 | 0.042448 | 0.191357 | 13.181   | 0.0313   | 0.083731 | 0.111234 | -5.67287 | 0.216798 | 5.889671 | 0.421983 | 0.795945 | 0.417423 |
| AC142293.3__antise | 6.72978  | 2.65921  | 21.8235  | 13.0027  | 6.70575  | 6.7358   | 13.0505  | 8.25486  | 1.68908  | 0.239169 | 0.440838 | 0.201669 | 0.836459 | 0.782677 | 0.622728 |
| AC144449.1__antise | 33.7078  | 21.0107  | 21.9693  | 12.6718  | 20.6903  | 337.008  | 15.6841  | 22.7194  | 23.2706  | -2.2719  | 0.314332 | 2.586231 | 0.462984 | 0.522447 | 0.431965 |
| AC144450.1__antise | 0.220891 | 0        | 2.02457  | 0.343271 | 10.2139  | 95.9374  | 0.498948 | 0.020369 | 2.33571  | -5.56762 | -0.34649 | 5.221132 | 0.362863 | 0.157609 | 0.364493 |
| AC144521.1__proce  | 10.7189  | 65.6429  | 25.0835  | 24.5074  | 501.956  | 143.906  | 19.0334  | 67.5533  | 39.3297  | -2.72425 | -0.31176 | 2.41249  | 0.273964 | 0.149162 | 0.296537 |
| AC144525.1__lincRN | 0        | 0        | 0.124154 | 0        | 0        | 0        | 0        | 0        | 0        | #DIV/0!  | #DIV/0!  | #DIV/0!  | 0.42265  | 0.42265  | #DIV/0!  |
| AC144833.1__sense  | 0.021236 | 0        | 0.063821 | 0        | 3.34745  | 24.6294  | 0.020852 | 0        | 0.015438 | -8.3616  | 1.22883  | 9.590426 | 0.350478 | 0.418092 | 0.350599 |
| AC144836.1__lincRN | 0        | 0.028422 | 1.2872   | 0.064086 | 1.70493  | 2.53386  | 1.43542  | 0        | 0.07942  | -1.70956 | -0.20342 | 1.506135 | 0.174869 | 0.938695 | 0.510455 |
| AC159540.1__lincRN | 13.2336  | 12.4781  | 65.9872  | 0        | 15.5768  | 0        | 0        | 0        | 68.6371  | 2.557506 | 0.417916 | -2.13959 | 0.347669 | 0.275616 | 0.564744 |
| AC159540.3__lincRN | 0        | 0        | 0.101438 | 0.04432  | 0.017775 | 2.45097  | 0        | 0.073445 | 0        | -4.63078 | 0.465864 | 5.096642 | 0.407513 | 0.870948 | 0.425565 |
| AC226119.5__proce  | 0.736712 | 0.442632 | 3.48101  | 0.507906 | 3.79871  | 7.44449  | 1.46128  | 0.404912 | 0.795377 | -1.33429 | 0.808163 | 2.142448 | 0.2125   | 0.585178 | 0.302685 |
| ACTBP2__pseudoge   | 290.434  | 495.707  | 33.6004  | 134.413  | 463.238  | 50.0182  | 0.474878 | 205.794  | 461.437  | 0.339912 | 0.295956 | -0.04396 | 0.379891 | 0.851876 | 0.977023 |
| ACTN1-AS1__antise  | 0        | 0        | 0.186644 | 0        | 0.296132 | 13.5541  | 0        | 0.203125 | 0        | -6.21348 | -0.12208 | 6.091399 | 0.410004 | 0.965506 | 0.418702 |
| ACTN3__polymorphi  | 5.20376  | 1.21343  | 0.837047 | 0.773437 | 1.29247  | 6.72608  | 1.39856  | 1.82763  | 2.60065  | -0.27737 | 0.31611  | 0.593476 | 0.879533 | 0.805578 | 0.593047 |
| ACVR2B-AS1__antis  | 0.129439 | 0.19426  | 0        | 14.3339  | 0.588987 | 14.7858  | 1.68022  | 0.165329 | 0        | -6.52009 | -2.51133 | 4.008763 | 0.172706 | 0.433519 | 0.173584 |
| AD000090.2__antise | 20.0582  | 15.7914  | 19.5581  | 9.57199  | 6.81273  | 8.21903  | 21.7347  | 17.9077  | 17.652   | 1.171208 | -0.04831 | -1.21952 | 0.004486 | 0.670406 | 0.00527  |
| ADAM1A__pseudoge   | 0.7561   | 1.75545  | 0.529012 | 0.88173  | 1.02192  | 3.81798  | 1.10036  | 1.16691  | 1.68586  | -0.91209 | -0.37866 | 0.533431 | 0.540966 | 0.607641 | 0.524698 |
| ADAM6__lincRNA     | 0        | 0.038785 | 0.181046 | 0        | 6.23776  | 2.64909  | 0.096688 | 0        | 0.08947  | -5.33721 | 0.239864 | 5.577071 | 0.250039 | 0.85984  | 0.255049 |
| ADAMTS9-AS1__an    | 0        | 0        | 0.077986 | 17.2401  | 2.63495  | 4.13205  | 0        | 0        | 0        | -8.26603 | #DIV/0!  | #DIV/0!  | 0.228414 | 0.42265  | 0.226668 |
| ADAMTS9-AS2__an    | 3.95363  | 2.96188  | 2.94995  | 3.07067  | 1342.87  | 337.008  | 2.20938  | 1.78853  | 1.16755  | -7.41439 | 0.933489 | 8.347879 | 0.300501 | 0.015441 | 0.299332 |
| ADARB2-AS1__antis  | 0        | 0        | 0.309351 | 3.5395   | 2.69127  | 15.6394  | 0        | 0        | 0.120404 | -6.14358 | 1.361361 | 7.504937 | 0.220133 | 0.42265  | 0.222146 |
| ADORA2A-AS1__an    | 5.75734  | 0.312685 | 0.981309 | 0.337249 | 188.323  | 95.6924  | 1.39856  | 0.510168 | 0.452152 | -5.33364 | 1.578572 | 6.912213 | 0.239749 | 0.383868 | 0.226873 |
| ADPGK-AS1__antise  | 0        | 0        | 0        | 0        | 0        | 7.35041  | 0        | 0        | 0        | #NUM!    | #DIV/0!  | #DIV/0!  | 0.42265  | #DIV/0!  | 0.42265  |
| AE000661.37__proci | 2.96468  | 0.054667 | 0.221786 | 0.360616 | 9.58815  | 222.268  | 0.297809 | 4.37037  | 0.861583 | -6.16283 | -0.77072 | 5.392111 | 0.405221 | 0.741592 | 0.409044 |

|                    |          |          |          |          |          |          |          |          |          |          |          |          |          |          |          |
|--------------------|----------|----------|----------|----------|----------|----------|----------|----------|----------|----------|----------|----------|----------|----------|----------|
| AF064858.11__lincR | 0        | 0        | 1.81869  | 0        | 2.2172   | 2.66883  | 3.23313  | 0.796969 | 1.82767  | -1.42576 | -1.68745 | -0.26169 | 0.254219 | 0.299694 | 0.84545  |
| AF064858.6__lincRN | 0.531084 | 0.9561   | 1.19498  | 5.12057  | 49.9894  | 126.717  | 2.46155  | 0.945418 | 0        | -6.08302 | -0.34509 | 5.737934 | 0.232933 | 0.815688 | 0.242026 |
| AF064858.7__lincRN | 0        | 0.022647 | 0.134505 | 0        | 0.163895 | 3.88643  | 0.150458 | 0        | 0.06265  | -4.6878  | -0.43942 | 4.248384 | 0.401338 | 0.808008 | 0.421599 |
| AF064860.5__sense  | 1.39226  | 0.198754 | 3.10032  | 38.9127  | 4.58531  | 200.636  | 3.28964  | 10.7921  | 3.51938  | -5.70153 | -1.9076  | 3.793934 | 0.312622 | 0.307947 | 0.34738  |
| AF124730.4__antise | 0.352031 | 0        | 0.782031 | 0        | 49.9894  | 0        | 0.66498  | 0        | 0        | -5.46205 | 0.770117 | 6.232167 | 0.435831 | 0.678479 | 0.43038  |
| AF127577.12__lincR | 0        | 0        | 0        | 0        | 0        | 0        | 0        | 0        | 0        | #DIV/0!  | #DIV/0!  | #DIV/0!  | #DIV/0!  | #DIV/0!  | #DIV/0!  |
| AF127577.8__antise | 1.5058   | 2.8145   | 2.79921  | 0.97461  | 12.0936  | 15.6394  | 0.537126 | 2.63292  | 0        | -2.01158 | 1.167274 | 3.178858 | 0.213684 | 0.231637 | 0.193584 |
| AF127936.5__lincRN | 0        | 0        | 0        | 0        | 0        | 0        | 0.049297 | 0        | 0        | #DIV/0!  | #NUM!    | #NUM!    | #DIV/0!  | 0.42265  | 0.42265  |
| AF127936.7__lincRN | 1.07885  | 1.37357  | 3.20756  | 0.812218 | 5.56069  | 41.9272  | 0.358535 | 1.45889  | 2.60192  | -3.09316 | 0.356964 | 3.450122 | 0.367891 | 0.241992 | 0.359287 |
| AF131217.1__lincRN | 1.58307  | 0.084686 | 0.451393 | 2.34612  | 25.6035  | 99.0029  | 1.58263  | 0.696002 | 0.268569 | -5.90466 | -0.26543 | 5.639232 | 0.29205  | 0.612682 | 0.294656 |
| AF146191.4__lincRN | 22.9648  | 13.1355  | 10.7432  | 23.6556  | 152.22   | 66.7925  | 10.3304  | 14.4627  | 7.95134  | -2.37306 | 0.516599 | 2.889663 | 0.246045 | 0.374179 | 0.194095 |
| AF212831.2__lincRN | 0        | 0        | 0        | 0        | 0        | 1.51397  | 0        | 0        | 0        | #NUM!    | #DIV/0!  | #DIV/0!  | 0.42265  | #DIV/0!  | 0.42265  |
| AF241725.4__lincRN | 0        | 0        | 0.179467 | 0.078553 | 7.45875  | 1.59863  | 0        | 0        | 0        | -5.66976 | #DIV/0!  | #DIV/0!  | 0.318973 | 0.42265  | 0.308567 |
| AF241725.6__lincRN | 0        | 0        | 0        | 0        | 0        | 3.98535  | 0        | 0        | 0        | #NUM!    | #DIV/0!  | #DIV/0!  | 0.42265  | #DIV/0!  | 0.42265  |
| AFAP1-AS1__antise  | 7.32573  | 0        | 0.364538 | 0        | 0        | 142.556  | 1.535    | 0        | 0        | -4.21235 | 2.324795 | 6.537146 | 0.45312  | 0.387517 | 0.4289   |
| AFG3L1P__pseudog   | 2.60943  | 2.89178  | 4.20722  | 5.63422  | 45.7629  | 13.737   | 1.91854  | 3.80157  | 6.28687  | -2.7461  | -0.30656 | 2.43954  | 0.273083 | 0.440707 | 0.282994 |
| AHCTF1P1__pseudc   | 13.4904  | 9.25208  | 8.25364  | 8.23172  | 4.00132  | 40.1316  | 4.93134  | 6.96761  | 7.13303  | -0.75651 | 0.703662 | 1.460167 | 0.623095 | 0.226422 | 0.422007 |
| AJ003147.9__antise | 2.19104  | 2.8276   | 3.25957  | 1.6528   | 10.4822  | 46.0483  | 1.13784  | 1.76136  | 2.71308  | -2.81321 | 0.560732 | 3.373946 | 0.337202 | 0.035137 | 0.313414 |
| AJ006995.3__lincRN | 0        | 0        | 0.584621 | 0        | 0.136696 | 61.315   | 0        | 0        | 0        | -6.71581 | #DIV/0!  | #DIV/0!  | 0.421352 | 0.42265  | 0.421364 |
| AJ009632.3__lincRN | 0        | 0        | 0.113345 | 0.030023 | 0        | 0.151243 | 0.044358 | 0        | 0.073878 | -0.67739 | -0.06094 | 0.616446 | 0.188937 | 0.952445 | 0.537497 |
| AJ239322.1__lincRN | 0        | 0        | 0        | 0        | 0        | 40.1316  | 0.062803 | 0        | 0        | #NUM!    | #NUM!    | 9.319696 | 0.42265  | 0.42265  | 0.423554 |
| AL022344.4__lincRN | 0        | 0        | 0.145184 | 0.032036 | 0.206093 | 3.02753  | 0.934817 | 0        | 0.131404 | -4.49142 | -2.87655 | 1.614868 | 0.376581 | 0.431222 | 0.582365 |
| AL022344.7__lincRN | 0        | 0.120779 | 0.068201 | 0        | 5.52814  | 11.3824  | 0.099954 | 0.14863  | 0.221929 | -6.48355 | -1.316   | 5.167545 | 0.230125 | 0.123611 | 0.233909 |
| AL022476.2__antise | 0        | 0        | 0        | 0        | 2.55692  | 5.95031  | 0        | 0        | 0        | #NUM!    | #DIV/0!  | #DIV/0!  | 0.24161  | #DIV/0!  | 0.24161  |
| AL034548.1__pseud  | 4.42643  | 5.08115  | 2.49947  | 3.26278  | 4.05395  | 3.7019   | 1.56981  | 3.28983  | 2.91709  | 0.123937 | 0.626646 | 0.502709 | 0.709353 | 0.281141 | 0.071765 |
| AL035610.1__proces | 0        | 0        | 0.530769 | 0        | 1.68374  | 32.9764  | 1.54803  | 0.094837 | 0.154891 | -6.02905 | -1.76004 | 4.269007 | 0.393505 | 0.54162  | 0.423247 |
| AL035610.2__lincRN | 0.032187 | 0.053131 | 0.239832 | 0        | 5.65124  | 16.0642  | 0.113795 | 0        | 0.089439 | -6.06148 | 0.67796  | 6.739436 | 0.264261 | 0.607139 | 0.267048 |
| AL109763.1__sense  | 0        | 0        | 0        | 0        | 0        | 0        | 0        | 0        | 0        | #DIV/0!  | #DIV/0!  | #DIV/0!  | #DIV/0!  | #DIV/0!  | #DIV/0!  |
| AL109763.2__lincRN | 0        | 0        | 2.26161  | 0.208899 | 4.36096  | 36.4713  | 0.568608 | 0        | 0.228672 | -4.18165 | 1.504192 | 5.685841 | 0.350791 | 0.599504 | 0.363531 |
| AL132709.1__lincRN | 0        | 0        | 0.403801 | 0.793988 | 1.88116  | 4.92906  | 0        | 0        | 0        | -4.23508 | #DIV/0!  | #DIV/0!  | 0.162638 | 0.42265  | 0.177115 |
| AL132709.5__lincRN | 6.41453  | 0.780573 | 0.68985  | 1.7679   | 2.80309  | 61.3649  | 0.553644 | 6.25461  | 3.64392  | -3.06389 | -0.40663 | 2.657261 | 0.449536 | 0.826573 | 0.446139 |
| AL132796.1__lincRN | 0        | 0        | 0        | 0.108195 | 0        | 0        | 0        | 0        | 0        | #NUM!    | #DIV/0!  | #DIV/0!  | 0.42265  | #DIV/0!  | 0.42265  |
| AL132868.1__pseud  | 0        | 0        | 0        | 0        | 0        | 0.883709 | 0        | 0        | 0        | #NUM!    | #DIV/0!  | #DIV/0!  | 0.42265  | #DIV/0!  | 0.42265  |
| AL133249.1__lincRN | 0        | 0        | 0.505348 | 0        | 3.45029  | 7.63169  | 2.05748  | 0        | 0        | -4.45479 | -2.02553 | 2.429265 | 0.228759 | 0.577027 | 0.395866 |
| AL133493.2__lincRN | 0.157992 | 0        | 0.210107 | 0.483622 | 11.6852  | 0.891778 | 0.204839 | 0.224156 | 0        | -5.14898 | -0.22087 | 4.928117 | 0.374187 | 0.886871 | 0.365787 |

|                    |          |          |          |          |          |          |          |          |          |          |          |          |          |          |          |
|--------------------|----------|----------|----------|----------|----------|----------|----------|----------|----------|----------|----------|----------|----------|----------|----------|
| AL136419.6__proces | 0        | 0        | 3.85934  | 4.35965  | 10.078   | 21.9843  | 0        | 2.75364  | 0        | -3.23838 | 0.487014 | 3.725396 | 0.112857 | 0.86535  | 0.1756   |
| AL157359.3__lincRN | 0.632853 | 0        | 0        | 0        | 0.515404 | 0        | 0        | 0.935556 | 0        | 0.296167 | -0.56395 | -0.86012 | 0.916918 | 0.845272 | 0.42265  |
| AL157359.4__lincRN | 0.043616 | 0        | 0        | 0        | 2.12175  | 11.6248  | 0.21247  | 0        | 0        | -8.29999 | -2.28432 | 6.015667 | 0.330503 | 0.42265  | 0.338855 |
| AL157902.3__antise | 0        | 0        | 1.72821  | 0        | 1.65038  | 0        | 0.419949 | 0.175047 | 0        | 0.06648  | 1.538327 | 1.471846 | 0.981196 | 0.633897 | 0.60277  |
| AL161668.5__lincRN | 0.340943 | 0        | 0.255288 | 0        | 0.747708 | 1.68025  | 0.12459  | 0        | 0        | -2.0258  | 2.258683 | 4.284483 | 0.35709  | 0.186271 | 0.278557 |
| AL162151.4__antise | 0        | 0        | 0.199978 | 0        | 0        | 22.6831  | 0        | 0        | 0        | -6.82563 | #DIV/0!  | #DIV/0!  | 0.42265  | 0.42265  | 0.42265  |
| AL163953.2__lincRN | 6.82602  | 8.24226  | 1.3834   | 4.96605  | 5.07001  | 10.4338  | 1.59706  | 3.7885   | 2.50314  | -0.31527 | 1.060375 | 1.375642 | 0.762523 | 0.289607 | 0.166176 |
| AL163953.3__lincRN | 4.41622  | 4.00905  | 2.85991  | 3.71145  | 46.0863  | 1554.35  | 3.91431  | 6.82873  | 2.65161  | -7.15123 | -0.24723 | 6.904006 | 0.407472 | 0.575875 | 0.408308 |
| AL353997.3__proces | 0.015467 | 0.047418 | 0.130128 | 0.038074 | 0.251782 | 27.9176  | 0.175031 | 0.050765 | 0.032031 | -7.19123 | -0.4177  | 6.773529 | 0.41795  | 0.800251 | 0.421345 |
| AL450992.2__antise | 1.30616  | 0.231311 | 1.07473  | 5.61629  | 12.0318  | 3.74901  | 1.08145  | 1.68508  | 1.82733  | -3.03408 | -0.81444 | 2.219636 | 0.155632 | 0.307596 | 0.153397 |
| AL589743.1__lincRN | 1.52508  | 4.37225  | 2.62384  | 1.41112  | 5.43575  | 43.3722  | 1.26888  | 2.29539  | 0        | -2.55911 | 1.257445 | 3.816557 | 0.409399 | 0.147268 | 0.380578 |
| AL592494.5__lincRN | 0.644279 | 0        | 1.07091  | 3.69523  | 7.08553  | 15.5096  | 3.68475  | 0.451637 | 1.38145  | -3.93809 | -1.68574 | 2.252359 | 0.133282 | 0.289375 | 0.231616 |
| AL592528.1__antise | 0        | 0        | 0.168398 | 0.06713  | 0.225137 | 0.290379 | 0.074266 | 0.036792 | 0.018328 | -1.79074 | 0.380196 | 2.17094  | 0.096505 | 0.868617 | 0.209308 |
| AL672294.1__antise | 0        | 0        | 0.540795 | 2.06686  | 1.75736  | 10.0734  | 1.43081  | 0        | 0.657633 | -4.68361 | -1.94927 | 2.734338 | 0.22193  | 0.377576 | 0.289748 |
| ALDH1L1-AS2__anti  | 0        | 0        | 0        | 0        | 2.7028   | 106.237  | 0.914612 | 0        | 0        | #NUM!    | #NUM!    | 6.896156 | 0.408153 | 0.42265  | 0.413143 |
| ALDH7A1P1__pseuc   | 8.19608  | 9.13204  | 7.93412  | 16.078   | 13.6958  | 11.3628  | 6.11495  | 5.32947  | 8.00609  | -0.70344 | 0.377175 | 1.080615 | 0.058238 | 0.226048 | 0.068138 |
| ALG1L2__pseudoge   | 1.62472  | 4.6803   | 1.73315  | 5.47678  | 1.90674  | 91.8143  | 3.5829   | 1.46744  | 2.51966  | -3.62537 | 0.086574 | 3.711943 | 0.416547 | 0.929681 | 0.407705 |
| ALKBH3-AS1__antis  | 0        | 0        | 0.095171 | 0        | 0.363909 | 6.50471  | 0        | 0        | 0.120726 | -6.17335 | -0.34314 | 5.830212 | 0.390851 | 0.42265  | 0.390728 |
| ALOX12P2__pseudo   | 1.26619  | 2.34133  | 2.12389  | 4.30348  | 4.69592  | 148.178  | 1.76782  | 0.378244 | 0.98779  | -4.77736 | 0.870952 | 5.648312 | 0.401543 | 0.354397 | 0.396117 |
| AMER2-AS1__lincRI  | 0        | 1.46379  | 0.098041 | 0        | 0.656264 | 9.92495  | 0.75419  | 0.014868 | 0.08886  | -2.76019 | 0.864328 | 3.624523 | 0.471874 | 0.751203 | 0.43214  |
| AMZ2P1__pseudoge   | 0.894037 | 0.771228 | 0.641084 | 1.36574  | 0.616813 | 3.00766  | 1.60326  | 1.01318  | 1.69521  | -1.11349 | -0.90263 | 0.210861 | 0.359186 | 0.104826 | 0.71844  |
| ANAPC1P1__pseudc   | 0        | 0.864402 | 1.15019  | 4.34281  | 2.79074  | 6.59296  | 2.03127  | 0        | 0.587793 | -2.76841 | -0.37856 | 2.389842 | 0.064045 | 0.846803 | 0.085677 |
| ANKRD10-IT1__sen:  | 116.939  | 295.317  | 45.2318  | 58.9532  | 152.22   | 277.196  | 28.2351  | 184.499  | 579.828  | -0.09424 | -0.79279 | -0.69855 | 0.936015 | 0.650247 | 0.425862 |
| ANKRD18DP__pseu    | 0.137123 | 0        | 0.067164 | 0        | 0.035889 | 4.10178  | 0.087735 | 0        | 0.024357 | -4.34015 | 0.865911 | 5.20606  | 0.437483 | 0.185576 | 0.430145 |
| ANKRD20A11P__ps    | 0.103402 | 0.096865 | 0.445524 | 0.261284 | 5.4581   | 38.7252  | 0.120052 | 0.216701 | 0.128209 | -6.1048  | 0.473955 | 6.578751 | 0.345799 | 0.692572 | 0.348122 |
| ANKRD20A14P__ps    | 1.58933  | 0.810079 | 2.17305  | 0        | 4.82307  | 1.98725  | 17.6547  | 21.0759  | 1.27035  | -0.57475 | -3.12899 | -2.55424 | 0.700937 | 0.209541 | 0.201805 |
| ANKRD20A5P__pse    | 24.5105  | 12.9614  | 10.3625  | 16.1224  | 4.39166  | 49.4162  | 2.66177  | 6.28434  | 6.43227  | -0.54787 | 1.637145 | 2.185013 | 0.687735 | 0.191673 | 0.301373 |
| ANKRD26P1__pseu    | 0        | 0.049562 | 0.070201 | 0.092961 | 2.77941  | 123.222  | 0.128982 | 0.005114 | 0.056057 | -10.0401 | -0.66699 | 9.373121 | 0.409561 | 0.703692 | 0.409964 |
| ANKRD36BP2__pse    | 67.2558  | 0.670076 | 2.57715  | 5.18468  | 1.21298  | 25.5918  | 1.68155  | 17.0823  | 0.906567 | 1.140089 | 1.841658 | 0.701569 | 0.664125 | 0.565967 | 0.759346 |
| ANKRD36B__pseudi   | 13.9468  | 42.6313  | 10.1405  | 29.5897  | 9.40266  | 67.3858  | 52.1799  | 25.9126  | 30.4745  | -0.67304 | -0.70242 | -0.02938 | 0.663341 | 0.479502 | 0.972716 |
| ANKRD44-IT1__sen:  | 1.27176  | 0.14287  | 0.514529 | 10.7535  | 32.8713  | 17.7253  | 0.236682 | 1.05575  | 0.229923 | -4.99102 | 0.341667 | 5.332689 | 0.10131  | 0.833328 | 0.086228 |
| ANP32AP1__pseudc   | 5.84375  | 5.86778  | 2.04681  | 60.3243  | 1149.12  | 183.916  | 1.38335  | 2.71969  | 0.795708 | -6.66212 | 1.489821 | 8.15194  | 0.312704 | 0.08675  | 0.310385 |
| ANP32C__pseudoge   | 1.14437  | 0.499034 | 1.48918  | 0.522678 | 0.918063 | 1.59326  | 0.726172 | 0.486061 | 0.698532 | 0.046132 | 0.713203 | 0.667071 | 0.924804 | 0.211409 | 0.36057  |
| AOC4P__pseudoger   | 0.296742 | 0.093884 | 0.108681 | 0.134597 | 0.278482 | 3.95579  | 0.141912 | 0.039551 | 0.015759 | -3.12926 | 1.340108 | 4.469368 | 0.420461 | 0.075101 | 0.389832 |
| AP000233.3__lincRN | 0        | 0        | 0        | 0        | 3.06189  | 3.8549   | 0        | 0        | 0        | #NUM!    | #DIV/0!  | #DIV/0!  | 0.188817 | #DIV/0!  | 0.188817 |

|                    |          |          |          |          |          |          |          |          |          |          |          |          |          |          |          |
|--------------------|----------|----------|----------|----------|----------|----------|----------|----------|----------|----------|----------|----------|----------|----------|----------|
| AP000233.4__lincRN | 0        | 0        | 0        | 0        | 49.9894  | 115.125  | 0.145194 | 0        | 0        | #NUM!    | #NUM!    | 10.15127 | 0.240467 | 0.42265  | 0.241135 |
| AP000235.2__lincRN | 0        | 0        | 0.975487 | 0.028844 | 15.6804  | 23.0318  | 0.136533 | 0.01186  | 0        | -5.3116  | 2.716696 | 8.028292 | 0.194299 | 0.515238 | 0.200131 |
| AP000244.1__pseud  | 0        | 0        | 0        | 0.341566 | 15.1409  | 0        | 0.126765 | 0        | 0        | #NUM!    | #NUM!    | 6.932335 | 0.409775 | 0.42265  | 0.414518 |
| AP000253.1__lincRN | 0.248369 | 0.031525 | 0        | 0.230907 | 0.212906 | 2.76127  | 0.192632 | 0.08128  | 0.261999 | -3.51741 | -0.93711 | 2.580297 | 0.389703 | 0.45746  | 0.384327 |
| AP000265.1__lincRN | 0.085232 | 0        | 0.119423 | 0        | 1.0583   | 1.32259  | 0.083513 | 0.018621 | 0.055641 | -3.54024 | 0.375323 | 3.915558 | 0.21699  | 0.592792 | 0.217872 |
| AP000266.7__antise | 0        | 1.09791  | 0.698334 | 1.15252  | 0        | 2.53678  | 1.48019  | 0        | 0        | -1.03836 | 0.279201 | 1.317565 | 0.550554 | 0.907411 | 0.501367 |
| AP000282.2__antise | 0.071476 | 0.099423 | 1.48737  | 0.331442 | 18.1443  | 54.898   | 0.790185 | 0.292219 | 0.177111 | -5.46751 | 0.39681  | 5.864324 | 0.265572 | 0.847214 | 0.276679 |
| AP000289.6__lincRN | 0        | 0        | 1.04807  | 0        | 4.8575   | 0.821306 | 0.583996 | 0        | 0.235692 | -2.43785 | 0.354588 | 2.792441 | 0.450201 | 0.86821  | 0.430651 |
| AP000290.7__antise | 0        | 0        | 0.644659 | 0        | 4.07764  | 1277.67  | 0.352883 | 0        | 0        | -10.9573 | 0.869346 | 11.82663 | 0.420809 | 0.770783 | 0.42097  |
| AP000302.58__antis | 0        | 0        | 0        | 0        | 0        | 7.73613  | 0.325167 | 0        | 0        | #NUM!    | #NUM!    | 4.572359 | 0.42265  | 0.42265  | 0.447405 |
| AP000318.2__lincRN | 0.32113  | 0.765815 | 1.30651  | 4.12878  | 6.47835  | 18.3927  | 0.526953 | 0.219595 | 0.210394 | -3.59888 | 1.322591 | 4.921469 | 0.165779 | 0.332148 | 0.172421 |
| AP000320.7__proce: | 274.454  | 6.30574  | 8.03073  | 30.6325  | 192.484  | 273.55   | 4.78207  | 13.0209  | 20.0831  | -0.78225 | 2.930284 | 3.712538 | 0.70419  | 0.463531 | 0.15006  |
| AP000330.8__antise | 0.105549 | 0.062231 | 0.270097 | 0        | 6.43933  | 5.40063  | 0.133301 | 0.236437 | 0.243381 | -4.75699 | -0.48564 | 4.271353 | 0.195764 | 0.432915 | 0.196591 |
| AP000343.2__lincRN | 0        | 0        | 0        | 0.881041 | 0        | 0        | 0        | 0        | 0        | #NUM!    | #DIV/0!  | #DIV/0!  | 0.42265  | #DIV/0!  | 0.42265  |
| AP000345.1__lincRN | 0        | 0        | 0.087625 | 0.680794 | 2.06327  | 6.18496  | 0        | 0        | 0        | -6.67101 | #DIV/0!  | #DIV/0!  | 0.211388 | 0.42265  | 0.213608 |
| AP000345.2__antise | 0        | 0        | 0        | 0        | 2.20577  | 2.60063  | 0        | 0        | 0        | #NUM!    | #DIV/0!  | #DIV/0!  | 0.186245 | #DIV/0!  | 0.186245 |
| AP000431.2__lincRN | 0.171707 | 0        | 0        | 0        | 0.535718 | 0        | 0.082896 | 0.555246 | 0        | -1.64152 | -1.89393 | -0.2524  | 0.626421 | 0.521084 | 0.305648 |
| AP000432.2__lincRN | 0        | 0        | 0        | 0.097702 | 0        | 1.39723  | 0.072597 | 0        | 0        | #NUM!    | #NUM!    | 4.364022 | 0.383783 | 0.42265  | 0.412371 |
| AP000439.1__lincRN | 0        | 0        | 0.112736 | 0.083145 | 0.160577 | 0        | 0.085891 | 0        | 0.068129 | -1.11229 | -0.45017 | 0.662118 | 0.645105 | 0.753727 | 0.703134 |
| AP000439.3__lincRN | 0.811498 | 3.7433   | 0.954805 | 2.4235   | 2.03369  | 6.58754  | 0.736261 | 2.30229  | 0.933756 | -1.00334 | 0.471971 | 1.475309 | 0.476388 | 0.384975 | 0.308658 |
| AP000459.4__lincRN | 0.010125 | 0        | 0        | 0.121215 | 0.292217 | 0        | 0        | 0        | 0.187567 | -5.3517  | -4.21145 | 1.140244 | 0.25517  | 0.454609 | 0.645436 |
| AP000459.7__lincRN | 0        | 0        | 0.077768 | 0.205223 | 0.370997 | 0        | 0        | 0        | 0.084301 | -2.88937 | -0.11637 | 2.773002 | 0.33237  | 0.42265  | 0.342989 |
| AP000462.1__proce: | 5.08033  | 0        | 1.85268  | 0        | 0        | 7.70697  | 0.636549 | 0        | 1.8853   | -0.15268 | 1.459    | 1.611682 | 0.942352 | 0.426903 | 0.488825 |
| AP000462.2__lincRN | 9.72743  | 0        | 1.97468  | 0.436267 | 0        | 0        | 0        | 0        | 0        | 4.745414 | #DIV/0!  | #DIV/0!  | 0.315238 | 0.31933  | 0.42265  |
| AP000462.3__lincRN | 0        | 0        | 0        | 1.98785  | 0        | 2.72974  | 0        | 0        | 0        | #NUM!    | #DIV/0!  | #DIV/0!  | 0.193416 | #DIV/0!  | 0.193416 |
| AP000470.2__lincRN | 0        | 0        | 0        | 0.400431 | 0.214338 | 5.75349  | 0        | 0        | 0        | #NUM!    | #DIV/0!  | #DIV/0!  | 0.362941 | #DIV/0!  | 0.362941 |
| AP000472.2__lincRN | 1.191    | 0        | 0.977336 | 11.242   | 6.43277  | 2.25291  | 0        | 3.01542  | 0.040259 | -3.20011 | -0.4949  | 2.705209 | 0.145643 | 0.848197 | 0.185289 |
| AP000472.3__lincRN | 0        | 0        | 0.287886 | 0        | 0.15115  | 31.2789  | 0        | 0        | 0        | -6.7705  | #DIV/0!  | #DIV/0!  | 0.419841 | 0.42265  | 0.419867 |
| AP000473.6__lincRN | 0.009086 | 0.014615 | 1.37048  | 0.113813 | 1.78223  | 7.70697  | 0.0631   | 0        | 0.011936 | -2.78407 | 4.215695 | 6.999764 | 0.279649 | 0.439868 | 0.303576 |
| AP000474.1__lincRN | 0        | 0        | 0        | 0        | 0        | 0        | 0        | 0        | 0        | #DIV/0!  | #DIV/0!  | #DIV/0!  | #DIV/0!  | #DIV/0!  | #DIV/0!  |
| AP000475.2__lincRN | 0        | 0        | 0        | 0        | 2.75081  | 3.9064   | 0        | 0        | 0        | #NUM!    | #DIV/0!  | #DIV/0!  | 0.195533 | #DIV/0!  | 0.195533 |
| AP000476.1__lincRN | 5.42803  | 0.279742 | 0.121371 | 0        | 29.7731  | 116.861  | 0.124694 | 0.120167 | 0.167845 | -4.65279 | 3.820097 | 8.472891 | 0.32553  | 0.410626 | 0.29884  |
| AP000477.2__lincRN | 0        | 0        | 0.263704 | 0        | 0.382877 | 0        | 0        | 0        | 0.190444 | -0.53796 | 0.469553 | 1.007514 | 0.852002 | 0.42265  | 0.74019  |
| AP000477.3__lincRN | 0        | 0        | 0.198276 | 0        | 2.70037  | 0        | 0        | 0        | 0        | -3.76758 | #DIV/0!  | #DIV/0!  | 0.466478 | 0.42265  | 0.42265  |
| AP000479.1__lincRN | 0        | 0.219771 | 0.888785 | 0.13122  | 8.78332  | 6.92982  | 0.032269 | 0.071943 | 0        | -3.83722 | 3.411084 | 7.2483   | 0.188251 | 0.356837 | 0.183649 |

|                    |          |          |          |          |          |          |          |          |          |          |          |          |          |          |          |
|--------------------|----------|----------|----------|----------|----------|----------|----------|----------|----------|----------|----------|----------|----------|----------|----------|
| AP000525.9__proce: | 17.1175  | 33.1233  | 1.48177  | 2.17648  | 3.49608  | 2.11697  | 0        | 22.1339  | 39.9918  | 2.731186 | -0.2644  | -2.99558 | 0.235714 | 0.862091 | 0.257812 |
| AP000640.10__antis | 0        | 0        | 0        | 0        | 8.12921  | 0.143843 | 0        | 1.26066  | 0.370147 | #NUM!    | #NUM!    | 2.342834 | 0.412526 | 0.283383 | 0.441975 |
| AP000662.4__sense  | 0.212333 | 0.22954  | 0.7398   | 3.76973  | 3.58855  | 48.3233  | 0.520057 | 0.212594 | 0.230989 | -5.5583  | 0.294265 | 5.852562 | 0.342198 | 0.788388 | 0.346205 |
| AP000688.14__sens  | 17.9791  | 4.54624  | 25.3     | 5.63887  | 74.265   | 189.602  | 5.82865  | 12.6666  | 10.3131  | -2.49447 | 0.731288 | 3.225758 | 0.28462  | 0.475489 | 0.266959 |
| AP000696.2__lincRN | 0        | 0.133189 | 0        | 0.186648 | 1.21913  | 0.214765 | 0        | 0        | 0        | -3.60493 | #DIV/0!  | #DIV/0!  | 0.235057 | 0.42265  | 0.252636 |
| AP000705.7__lincRN | 0        | 0.113218 | 1.2851   | 0        | 99.0978  | 13.5083  | 0.64662  | 0        | 0        | -6.33145 | 1.112702 | 7.444151 | 0.356245 | 0.699255 | 0.353707 |
| AP000797.3__lincRN | 0.060804 | 0        | 2.65486  | 0.274777 | 20.3366  | 868.728  | 2.36616  | 0.210728 | 0.063928 | -8.35529 | 0.040321 | 8.395607 | 0.409113 | 0.987563 | 0.410823 |
| AP000797.4__lincRN | 0        | 0        | 0        | 0        | 2.47824  | 6.12724  | 0.535483 | 0        | 0        | #NUM!    | #NUM!    | 4.006343 | 0.248291 | 0.42265  | 0.297369 |
| AP000855.4__lincRN | 0        | 0        | 0        | 0        | 0        | 0        | 0.165345 | 0        | 0        | #DIV/0!  | #NUM!    | #NUM!    | #DIV/0!  | 0.42265  | 0.42265  |
| AP000946.2__lincRN | 0        | 0        | 0.829169 | 0        | 0        | 0        | 0        | 0        | 0        | #DIV/0!  | #DIV/0!  | #DIV/0!  | 0.42265  | 0.42265  | #DIV/0!  |
| AP000959.2__lincRN | 0        | 0        | 0        | 0.221208 | 2.93149  | 6.19807  | 0.196335 | 0        | 0        | #NUM!    | #NUM!    | 5.573696 | 0.213014 | 0.42265  | 0.229142 |
| AP000997.1__lincRN | 0        | 0        | 0        | 0        | 3.72176  | 0        | 9.31251  | 0.269476 | 0        | #NUM!    | #NUM!    | -1.36434 | 0.42265  | 0.406192 | 0.659337 |
| AP000998.2__lincRN | 0        | 0        | 0.829943 | 0        | 23.3512  | 7.02671  | 0        | 0.185082 | 0        | -5.19387 | 2.164848 | 7.358714 | 0.293877 | 0.562157 | 0.279924 |
| AP001042.1__lincRN | 0        | 0        | 0        | 0        | 1.52012  | 0        | 0        | 0.263295 | 0        | #NUM!    | #NUM!    | 2.529433 | 0.42265  | 0.42265  | 0.42265  |
| AP001046.5__lincRN | 0        | 0        | 0        | 0        | 0        | 0        | 0        | 0        | 0        | #DIV/0!  | #DIV/0!  | #DIV/0!  | #DIV/0!  | #DIV/0!  | #DIV/0!  |
| AP001046.6__lincRN | 0        | 0        | 0.18172  | 0        | 0.218465 | 0.040075 | 0.051272 | 0        | 0.011388 | -0.50867 | 1.536112 | 2.044782 | 0.829655 | 0.613566 | 0.500097 |
| AP001056.1__lincRN | 0        | 0.194589 | 1.31092  | 0.162885 | 0.857261 | 1.03142  | 0.442124 | 0.179325 | 0        | -0.44647 | 1.276543 | 1.723018 | 0.572473 | 0.631086 | 0.347529 |
| AP001057.1__antise | 0        | 0        | 0        | 0        | 0.180233 | 0        | 0.200729 | 0        | 0        | #NUM!    | #NUM!    | -0.15539 | 0.42265  | 0.42265  | 0.956135 |
| AP001065.2__antise | 0.818063 | 0.189438 | 2.57381  | 4.25968  | 6.60099  | 2.92893  | 2.29374  | 0.285659 | 0        | -1.94502 | 0.473453 | 2.418474 | 0.191031 | 0.805129 | 0.105274 |
| AP001092.4__antise | 0        | 0        | 0        | 0        | 8.13415  | 165.287  | 0.670488 | 0        | 0        | #NUM!    | #NUM!    | 8.014853 | 0.394969 | 0.42265  | 0.397313 |
| AP001171.1__lincRN | 0.038772 | 0        | 0.077445 | 0        | 0.369475 | 0        | 0.226881 | 0        | 0.209882 | -1.66865 | -1.91002 | -0.24137 | 0.614698 | 0.195546 | 0.919351 |
| AP001189.4__antise | 0        | 0        | 0        | 0        | 0        | 0        | 0        | 0        | 0        | #DIV/0!  | #DIV/0!  | #DIV/0!  | #DIV/0!  | #DIV/0!  | #DIV/0!  |
| AP001255.2__lincRN | 0        | 0        | 0        | 0        | 2.64202  | 115.125  | 0        | 0        | 0        | #NUM!    | #DIV/0!  | #DIV/0!  | 0.409555 | #DIV/0!  | 0.409555 |
| AP001258.4__lincRN | 18.3421  | 8.5269   | 10.5533  | 9.81257  | 2.692    | 8.86111  | 13.1233  | 14.9572  | 20.9104  | 0.808603 | -0.38862 | -1.19722 | 0.114753 | 0.496333 | 0.089097 |
| AP001347.6__antise | 6.53249  | 19.851   | 2.43038  | 10.1281  | 42.4372  | 637.067  | 22.31    | 1.98841  | 0        | -4.58099 | 0.245902 | 4.826894 | 0.399221 | 0.891177 | 0.398354 |
| AP001372.2__lincRN | 2.15209  | 2.59457  | 2.29911  | 6.57465  | 1.95978  | 3.50445  | 4.77118  | 7.81757  | 5.7248   | -0.77287 | -1.37808 | -0.60521 | 0.37705  | 0.039514 | 0.444281 |
| AP001422.3__lincRN | 0        | 0.131268 | 0.419652 | 0        | 0.228955 | 0        | 0.233584 | 0        | 0        | 1.266779 | 1.237901 | -0.02888 | 0.56858  | 0.632024 | 0.991829 |
| AP001439.2__antise | 1.56564  | 12.3544  | 2.16385  | 1.98831  | 3.32714  | 63.0913  | 1.48996  | 1.18661  | 0.638111 | -2.08852 | 2.278674 | 4.367197 | 0.509553 | 0.34595  | 0.398627 |
| AP001464.4__lincRN | 0        | 2.30483  | 0.743062 | 0        | 3.52078  | 5.67939  | 0.879394 | 0        | 0        | -1.59385 | 1.79323  | 3.387079 | 0.301318 | 0.514053 | 0.287217 |
| AP001471.1__antise | 0.052863 | 0        | 0.685418 | 0        | 9.91111  | 1.87311  | 0        | 0        | 0        | -3.99654 | #DIV/0!  | #DIV/0!  | 0.361123 | 0.379963 | 0.325476 |
| AP001476.2__lincRN | 0        | 0.08564  | 0.127173 | 0        | 0.19376  | 57.7462  | 0.088921 | 0.059483 | 0.138233 | -8.08883 | -0.42964 | 7.659192 | 0.421567 | 0.543398 | 0.422197 |
| AP001476.3__lincRN | 0        | 0        | 0        | 0        | 0        | 4.82554  | 0        | 0.14119  | 0        | #NUM!    | #NUM!    | 5.094981 | 0.42265  | 0.42265  | 0.439782 |
| AP001476.4__lincRN | 0        | 0        | 0        | 0        | 0        | 2.25127  | 0        | 0        | 0        | #NUM!    | #DIV/0!  | #DIV/0!  | 0.42265  | #DIV/0!  | 0.42265  |
| AP001595.1__lincRN | 0        | 0        | 0.52261  | 0        | 3.29128  | 0.349307 | 0        | 0        | 0        | -2.80036 | #DIV/0!  | #DIV/0!  | 0.453807 | 0.42265  | 0.364942 |
| AP001597.1__antise | 1.79747  | 0.660123 | 4.12631  | 2.70683  | 39.5351  | 100.469  | 0.168074 | 1.32239  | 1.06422  | -4.43801 | 1.365798 | 5.803807 | 0.243529 | 0.341238 | 0.240386 |

|                    |          |          |          |          |          |          |          |          |          |          |          |          |          |          |          |
|--------------------|----------|----------|----------|----------|----------|----------|----------|----------|----------|----------|----------|----------|----------|----------|----------|
| AP001601.2__antise | 1.98797  | 1.53006  | 2.18729  | 0.700216 | 4.58531  | 61.315   | 0.196065 | 0.539888 | 0.773633 | -3.54515 | 1.918155 | 5.463309 | 0.406324 | 0.026335 | 0.380665 |
| AP001604.3__lincRN | 0.011356 | 0.01339  | 0        | 0        | 26.9193  | 14.6577  | 0.022281 | 0        | 0.024743 | -10.7144 | -0.92617 | 9.788194 | 0.217016 | 0.573837 | 0.217434 |
| AP001610.9__lincRN | 0        | 0        | 0.724417 | 0.777868 | 0        | 4.24549  | 0.61225  | 0        | 0        | -2.79376 | 0.2427   | 3.036459 | 0.311699 | 0.931723 | 0.400583 |
| AP001626.1__lincRN | 0.071093 | 0        | 0.21344  | 0        | 5.27548  | 62.2177  | 0.150615 | 0        | 0        | -7.89    | 0.917731 | 8.807732 | 0.376443 | 0.660549 | 0.37733  |
| AP001626.2__antise | 0.010427 | 0.012295 | 0.156636 | 0.083216 | 0.21208  | 61.9657  | 0.175163 | 0.011405 | 0.056811 | -8.43934 | -0.44036 | 7.998981 | 0.420107 | 0.808111 | 0.421639 |
| AP001628.7__lincRN | 0        | 0        | 0.173086 | 0        | 5.35723  | 2.66247  | 0.042233 | 0.141324 | 0.140638 | -5.53399 | -0.90537 | 4.628616 | 0.233119 | 0.422335 | 0.233134 |
| AP001630.5__antise | 0.09522  | 0        | 0.662083 | 0        | 2.42928  | 107.817  | 0        | 0        | 0        | -7.18564 | #DIV/0!  | #DIV/0!  | 0.410226 | 0.346341 | 0.409791 |
| AP001891.1__lincRN | 0        | 0        | 0.179465 | 0        | 0.903249 | 1.67427  | 0.534237 | 0        | 0        | -3.84421 | -1.57378 | 2.270431 | 0.207267 | 0.636556 | 0.402981 |
| AP002387.1__pseud  | 0.013837 | 0.032634 | 0.767041 | 0.073536 | 5.49439  | 72.3795  | 1.70095  | 0.03025  | 0.030132 | -6.58219 | -1.11443 | 5.467763 | 0.379936 | 0.702762 | 0.393911 |
| AP002856.4__lincRN | 0        | 0        | 0        | 0        | 0        | 0        | 0        | 0        | 0        | #DIV/0!  | #DIV/0!  | #DIV/0!  | #DIV/0!  | #DIV/0!  | #DIV/0!  |
| AP002856.5__lincRN | 0        | 0.074863 | 0.695181 | 51.9691  | 3.62538  | 30.7991  | 0.523302 | 0.206    | 0        | -6.80984 | 0.078424 | 6.888264 | 0.178325 | 0.973269 | 0.176489 |
| AP002856.6__lincRN | 0        | 0        | 0.399005 | 0        | 28.6367  | 4.68391  | 0        | 0        | 0.359131 | -6.38386 | 0.151897 | 6.535761 | 0.343569 | 0.42265  | 0.342908 |
| AP002856.7__lincRN | 0        | 0        | 0.457893 | 0        | 0.688179 | 4.66118  | 0.382058 | 0.071058 | 0.141323 | -3.54628 | -0.37652 | 3.169766 | 0.336952 | 0.842718 | 0.400307 |
| AP002954.4__antise | 47.2806  | 25.1582  | 16.9433  | 15.1083  | 42.5527  | 56.3324  | 14.3023  | 31.067   | 26.6668  | -0.35089 | 0.311266 | 0.662158 | 0.735643 | 0.71293  | 0.238756 |
| AP003025.2__antise | 0.019989 | 0        | 0.29129  | 0        | 1.78681  | 189.602  | 0.817831 | 0.087522 | 0.109002 | -9.26408 | -1.70428 | 7.559801 | 0.417287 | 0.50682  | 0.419993 |
| AP003419.11__proc  | 10.9209  | 3.44251  | 5.72342  | 3.83594  | 2.3182   | 7.18468  | 4.31484  | 8.21116  | 5.98342  | 0.590619 | 0.11799  | -0.47263 | 0.467832 | 0.888277 | 0.505196 |
| AP003774.5__lincRN | 0        | 0        | 0.201412 | 0        | 0        | 7.75174  | 0        | 0        | 0.072509 | -5.2663  | 1.473916 | 6.740214 | 0.42265  | 0.42265  | 0.42265  |
| AP003774.6__lincRN | 0.066391 | 0        | 0.29854  | 0.175302 | 2.79995  | 35.9322  | 0.45379  | 0        | 0.071969 | -6.73628 | -0.52678 | 6.2095   | 0.377441 | 0.793101 | 0.383948 |
| AP003900.6__lincRN | 0        | 0        | 2.20314  | 1.68259  | 2.35102  | 3.43347  | 1.20655  | 0.018397 | 0.018324 | -1.76098 | 0.82542  | 2.586403 | 0.032736 | 0.777964 | 0.136854 |
| AP005273.1__lincRN | 0        | 0        | 0.146966 | 0        | 0        | 1.17902  | 0        | 0        | 0        | -3.00403 | #DIV/0!  | #DIV/0!  | 0.42265  | 0.42265  | 0.42265  |
| AP005530.1__lincRN | 0.068067 | 4.84321  | 0        | 6.79034  | 11.7698  | 5.70027  | 0        | 0        | 0        | -2.30443 | #DIV/0!  | #DIV/0!  | 0.003441 | 0.414593 | 0.049444 |
| AP005901.1__pseud  | 0.033361 | 1.70869  | 0.935631 | 0.066475 | 4.49914  | 177.814  | 0.128493 | 0.28128  | 0.10896  | -6.08982 | 2.36792  | 8.457737 | 0.413506 | 0.245593 | 0.409314 |
| AP006216.10__antis | 0        | 0        | 0        | 0        | 0        | 0        | 0        | 0        | 0        | #DIV/0!  | #DIV/0!  | #DIV/0!  | #DIV/0!  | #DIV/0!  | #DIV/0!  |
| AP006216.12__antis | 917.067  | 0.874321 | 23.4415  | 0        | 7.42011  | 58.3635  | 0.966941 | 0        | 0.321224 | 3.838981 | 9.51332  | 5.674339 | 0.44917  | 0.407717 | 0.363725 |
| AP006216.5__antise | 0        | 0        | 0.583031 | 0        | 0        | 24.4365  | 0        | 0        | 0        | -5.38932 | #DIV/0!  | #DIV/0!  | 0.42265  | 0.42265  | 0.42265  |
| AP006285.6__lincRN | 0        | 0        | 0.18832  | 0.329488 | 0        | 0.265434 | 0.061125 | 0        | 0.135666 | -1.65951 | -0.06348 | 1.596033 | 0.306272 | 0.939376 | 0.22889  |
| AP006621.8__antise | 20.3254  | 20.1318  | 21.6154  | 15.4933  | 13.6625  | 13.0311  | 13.9143  | 31.5442  | 23.3921  | 0.557161 | -0.14951 | -0.70667 | 0.025812 | 0.703762 | 0.257275 |
| AP006748.1__lincRN | 0.416093 | 3.70973  | 0.717852 | 1.2559   | 12.6615  | 3.67886  | 1.81042  | 2.59876  | 0.702777 | -1.86109 | -0.07777 | 1.783321 | 0.222202 | 0.913122 | 0.31408  |
| AP1B1P1__pseudog   | 0        | 0        | 1.0851   | 0.107649 | 0.441183 | 73.2321  | 0.699665 | 0        | 0.834145 | -6.08735 | -0.49929 | 5.588056 | 0.418269 | 0.651474 | 0.423883 |
| AP4B1-AS1__antise  | 3.4964   | 2.448    | 5.22363  | 66.3958  | 46.7284  | 6.97397  | 60.2406  | 6.273    | 25.1167  | -3.42677 | -3.03645 | 0.390318 | 0.182626 | 0.228986 | 0.632819 |
| APCDD1L-AS1__pro   | 0.359436 | 0.707639 | 1.57188  | 0.343537 | 18.1122  | 6.10846  | 0.559846 | 0.049136 | 1.0475   | -3.21852 | 0.671844 | 3.890362 | 0.296204 | 0.344478 | 0.294998 |
| AQP4-AS1__antisen  | 0.927677 | 0.102531 | 4.7186   | 13.8039  | 22.3487  | 637.067  | 0.110238 | 2.70165  | 0.082404 | -6.87167 | 0.990052 | 7.861723 | 0.391085 | 0.69353  | 0.392859 |
| ARAP1-AS2__antise  | 0        | 0        | 0        | 0        | 0        | 0        | 0        | 0        | 0        | #DIV/0!  | #DIV/0!  | #DIV/0!  | #DIV/0!  | #DIV/0!  | #DIV/0!  |
| ARHGEF26-AS1__p    | 0        | 0.053671 | 0.091156 | 0.105913 | 4.58459  | 28.6779  | 0.056402 | 0        | 0        | -7.84802 | 1.360495 | 9.20851  | 0.337279 | 0.574143 | 0.337765 |
| ARHGEF7-IT1__sen   | 0        | 0.027036 | 0.160503 | 0        | 11.4558  | 61.0596  | 2.90462  | 0.025012 | 0        | -8.59495 | -3.96546 | 4.629496 | 0.326065 | 0.455785 | 0.353971 |



|                    |          |          |          |          |          |          |          |          |          |          |          |          |          |          |          |
|--------------------|----------|----------|----------|----------|----------|----------|----------|----------|----------|----------|----------|----------|----------|----------|----------|
| ARL5B-AS1__lincRN  | 1.32775  | 4.70729  | 1.00409  | 7.02682  | 1.43305  | 30.5268  | 14.4576  | 1.12905  | 0.84124  | -2.46951 | -1.22268 | 1.246834 | 0.39016  | 0.60171  | 0.57441  |
| ARMC4P1__pseudo    | 0.027967 | 0        | 0.167311 | 0        | 6.41943  | 2.91478  | 0.244581 | 0.03032  | 0        | -5.57893 | -0.49339 | 5.085542 | 0.244369 | 0.833065 | 0.255655 |
| ASB16-AS1__antise  | 0.622573 | 2.59727  | 0        | 2.50484  | 1.32467  | 3.16587  | 1.0132   | 4.27152  | 1.76492  | -1.11941 | -1.13056 | -0.01115 | 0.440618 | 0.102576 | 0.991268 |
| ATP11A-AS1__antis  | 0        | 182.702  | 0.127501 | 1.00647  | 7.45875  | 10.9337  | 10.9887  | 0.047247 | 0.080541 | 3.236451 | 4.039726 | 0.803275 | 0.462597 | 0.458215 | 0.710252 |
| ATP1A1OS__proces   | 0.378783 | 1.16678  | 0.754819 | 1.51409  | 5.19606  | 8.24658  | 1.44799  | 1.3644   | 1.69696  | -2.70085 | -0.97105 | 1.729803 | 0.148548 | 0.113547 | 0.205127 |
| ATP8A2P1__pseudo   | 0        | 0        | 0        | 0        | 663.926  | 53.9086  | 0        | 0        | 0        | #NUM!    | #DIV/0!  | #DIV/0!  | 0.377818 | #DIV/0!  | 0.377818 |
| ATP8A2P3__pseudo   | 0        | 4.09062  | 0.20069  | 0.037669 | 4.01163  | 15.251   | 0.871016 | 0        | 0        | -2.16913 | 2.300647 | 4.46978  | 0.424245 | 0.528387 | 0.326223 |
| ATXN8OS__antisens  | 0.005635 | 0.009199 | 0.057706 | 0.028474 | 0.09506  | 0.163737 | 0.134682 | 0.00475  | 0.026509 | -1.98557 | -1.19383 | 0.791741 | 0.103799 | 0.594055 | 0.64191  |
| AY269186.2__lincRN | 0        | 0        | 0        | 0        | 0        | 0        | 0        | 0        | 0        | #DIV/0!  | #DIV/0!  | #DIV/0!  | #DIV/0!  | #DIV/0!  | #DIV/0!  |
| B4GALT4-AS1__ant   | 7.55124  | 6.40817  | 6.23246  | 2.80451  | 54.5339  | 374.648  | 5.56754  | 9.30793  | 6.42053  | -4.41914 | -0.07681 | 4.342332 | 0.360158 | 0.818818 | 0.360892 |
| BACH1-IT1__sense_  | 46.8051  | 4.29389  | 5.56743  | 7.52742  | 4.80344  | 15.5416  | 6.54747  | 5.06627  | 2.21132  | 1.023654 | 2.035208 | 1.011555 | 0.589805 | 0.387831 | 0.393345 |
| BACH1-IT2__lincRN  | 1.14313  | 1.75545  | 1.03844  | 2.55492  | 0        | 0.59869  | 2.85876  | 0.122547 | 0.730054 | 0.3201   | 0.085156 | -0.23494 | 0.802939 | 0.945453 | 0.08771  |
| BAGE2__pseudogen   | 5.60936  | 0.517652 | 9.14967  | 24.1491  | 32.2424  | 162.996  | 6.70838  | 0.312289 | 3.51708  | -3.84408 | 0.535765 | 4.379843 | 0.254974 | 0.523547 | 0.262855 |
| BAIAP2-AS1__lincRl | 0.979366 | 0.70055  | 1.45213  | 0.713041 | 0.944989 | 0.388772 | 0.173123 | 1.70099  | 1.18919  | 0.613734 | 0.032017 | -0.58172 | 0.442123 | 0.969738 | 0.52141  |
| BAK1P1__pseudoge   | 1.32228  | 2.04909  | 2.55623  | 3.27279  | 3.03705  | 3.68884  | 0.944901 | 3.35767  | 1.43378  | -0.75429 | 0.047315 | 0.801604 | 0.045464 | 0.937435 | 0.244409 |
| BCAR4__lincRNA     | 0        | 0        | 0.651088 | 0        | 10.1379  | 2.70289  | 0.754943 | 0        | 0        | -4.30174 | -0.21352 | 4.088222 | 0.319596 | 0.939854 | 0.336661 |
| BCDIN3D-AS1__anti  | 1.11517  | 0.543059 | 0.763859 | 0.494681 | 0.420134 | 2.47927  | 0.88791  | 0.721742 | 0.845507 | -0.48677 | -0.01957 | 0.467206 | 0.693061 | 0.93644  | 0.682482 |
| BCRP2__pseudogen   | 0.140499 | 0.206485 | 2.23213  | 0.201623 | 1.90815  | 2.01386  | 0.231341 | 0.130118 | 0.21131  | -0.67704 | 2.17085  | 2.847891 | 0.480555 | 0.427771 | 0.190355 |
| BCRP3__pseudogen   | 0        | 0.053513 | 0.257467 | 0.154463 | 0.89296  | 1.77064  | 0.158525 | 0        | 0.049845 | -3.17981 | 0.577673 | 3.757484 | 0.166832 | 0.777827 | 0.222823 |
| BCRP6__pseudogen   | 0.307908 | 0.248484 | 0.556646 | 0.54939  | 0.819264 | 0.582712 | 1.73419  | 0.194906 | 0.358212 | -0.80998 | -1.03915 | -0.22917 | 0.219729 | 0.529523 | 0.857168 |
| BDNF-AS__antisens  | 66.1802  | 45.3747  | 10.5721  | 43.7971  | 40.7263  | 379.204  | 64.3624  | 14.8637  | 47.0049  | -1.92489 | -0.04768 | 1.877211 | 0.466012 | 0.950176 | 0.416323 |
| BHLHE40-AS1__ant   | 27.7309  | 22.1694  | 20.4505  | 33.7562  | 10.4306  | 31.4709  | 95.4319  | 14.8725  | 23.6962  | -0.10492 | -0.9296  | -0.82468 | 0.821777 | 0.460936 | 0.459515 |
| BMS1P16__pseudog   | 0        | 3.8108   | 3.60402  | 0        | 1.4862   | 21.9843  | 0        | 0        | 0        | -1.66237 | #DIV/0!  | #DIV/0!  | 0.499654 | 0.183821 | 0.385023 |
| BMS1P18__lincRNA   | 0        | 0        | 0        | 1.55688  | 0        | 1.91366  | 0.909717 | 0        | 0        | #NUM!    | #NUM!    | 1.93167  | 0.187784 | 0.42265  | 0.268119 |
| BMS1P1__pseudoge   | 0.467058 | 0.565071 | 0.719259 | 0.588536 | 0.471591 | 17.7721  | 1.06291  | 0.71702  | 0.670446 | -3.42663 | -0.4845  | 2.942129 | 0.421725 | 0.345777 | 0.44722  |
| BOK-AS1__antisens  | 2.38331  | 1.0453   | 2.6915   | 1.12276  | 2.38409  | 72.3795  | 0.35678  | 1.03158  | 2.41865  | -3.63221 | 0.684899 | 4.31711  | 0.422203 | 0.346915 | 0.405314 |
| BPESC1__lincRNA    | 0        | 0.019552 | 0.074745 | 0        | 8.877    | 8.60781  | 0.065114 | 0        | 0.018078 | -7.53467 | 0.18077  | 7.71544  | 0.183645 | 0.927557 | 0.186669 |
| BPIFA4P__pseudog   | 0        | 0        | 0.13181  | 0.279073 | 5.69806  | 2.82898  | 0        | 0        | 0        | -6.06197 | #DIV/0!  | #DIV/0!  | 0.206365 | 0.42265  | 0.201575 |
| BRD7P5__pseudoge   | 8.0847   | 48.2126  | 7.96988  | 17.5367  | 2.04743  | 4.4166   | 5.13845  | 23.1725  | 10.7497  | 1.421004 | 0.718366 | -0.70264 | 0.508051 | 0.426271 | 0.656331 |
| BSN-AS2__lincRNA   | 0.037768 | 0.044537 | 0.239499 | 0.200801 | 4.89097  | 1.5279   | 0.407463 | 0.143112 | 0.181998 | -4.36251 | -1.18679 | 3.175715 | 0.275309 | 0.387043 | 0.311857 |
| BX322557.13__lincR | 0        | 0        | 0        | 0        | 0        | 3.79465  | 0        | 0        | 0        | #NUM!    | #DIV/0!  | #DIV/0!  | 0.42265  | #DIV/0!  | 0.42265  |
| BX470102.3__antise | 550.526  | 460.014  | 337.079  | 175.46   | 134.541  | 145.307  | 421.073  | 366.513  | 564.446  | 1.565498 | -0.00472 | -1.57021 | 0.032239 | 0.99083  | 0.038303 |
| BZRAP1-AS1__antis  | 695.604  | 873.235  | 120.433  | 85.7502  | 91.5996  | 38.7252  | 588.454  | 190.788  | 155.558  | 2.966798 | 0.853672 | -2.11313 | 0.144971 | 0.370255 | 0.21043  |
| BZW1P1__pseudoge   | 63.4982  | 58.9398  | 74.2845  | 31.2693  | 20.6259  | 58.8115  | 47.6177  | 99.454   | 60.5677  | 0.829419 | -0.07792 | -0.90734 | 0.05232  | 0.861858 | 0.305007 |
| C10orf71-AS1__anti | 0        | 0        | 0.149317 | 0        | 0        | 3.35941  | 0        | 0.04979  | 0        | -4.49176 | 1.584451 | 6.076208 | 0.42265  | 0.634929 | 0.431269 |



|                     |          |          |          |          |          |          |          |          |          |          |          |          |          |          |          |
|---------------------|----------|----------|----------|----------|----------|----------|----------|----------|----------|----------|----------|----------|----------|----------|----------|
| CEACAM20__proces    | 0.988063 | 0        | 1.82269  | 8.78658  | 3.13098  | 7.83314  | 2.03046  | 0        | 0        | -2.81288 | 0.46915  | 3.282025 | 0.053378 | 0.785446 | 0.05338  |
| CEACAM22P__pseu     | 2.15193  | 0.057324 | 1.57188  | 0.012936 | 9.70298  | 438.263  | 1.11767  | 0.251848 | 0.25071  | -6.88847 | 1.222622 | 8.11109  | 0.412875 | 0.261378 | 0.411787 |
| CEACAMP10__pseu     | 0        | 0        | 0.067923 | 0        | 0.149627 | 0.109968 | 0.393972 | 0        | 0        | -1.93428 | -2.53611 | -0.60183 | 0.287992 | 0.529136 | 0.82187  |
| CECR3__processed    | 0.063101 | 0.241845 | 1.49317  | 2.52437  | 3.12709  | 1.92132  | 1.19826  | 0.327505 | 0.711429 | -2.07434 | -0.3152  | 1.759133 | 0.126427 | 0.81643  | 0.07372  |
| CECR5-AS1__antise   | 0        | 0        | 0        | 0        | 1.96107  | 0        | 0        | 0        | 0        | #NUM!    | #DIV/0!  | #DIV/0!  | 0.42265  | #DIV/0!  | 0.42265  |
| CECR7__lincRNA      | 0        | 0        | 0.198554 | 0.143831 | 2.65632  | 1.33229  | 0.17508  | 1.33169  | 2.33038  | -4.37939 | -4.27243 | 0.106959 | 0.214576 | 0.166262 | 0.897227 |
| CEP164P1__pseudo    | 11.1963  | 8.19991  | 6.12035  | 216.437  | 37.7506  | 1865.22  | 4.39949  | 7.48272  | 6.65665  | -6.37608 | 0.460881 | 6.836965 | 0.353742 | 0.412363 | 0.35167  |
| CEP170P1__pseudo    | 2.19336  | 0.720155 | 49.7408  | 2.42598  | 22.3905  | 11.638   | 0.776733 | 2.5295   | 0.883041 | 0.530456 | 3.65178  | 3.121324 | 0.786631 | 0.427923 | 0.177418 |
| CERS6-AS1__antise   | 1.89257  | 0.601426 | 0        | 2.74709  | 3.11888  | 4.91604  | 0        | 0        | 0        | -2.1121  | #DIV/0!  | #DIV/0!  | 0.143815 | 0.274909 | 0.03301  |
| CES5AP1__pseudoc    | 0        | 0        | 0        | 0        | 1.68374  | 62.5575  | 0.747246 | 0        | 0        | #NUM!    | #NUM!    | 6.425773 | 0.407325 | 0.42265  | 0.414261 |
| CFL1P1__pseudoge    | 0.01416  | 0.016698 | 12.7955  | 0.037622 | 0.10595  | 25.6576  | 0.353393 | 0.170242 | 0.107913 | -1.00833 | 4.344075 | 5.3524   | 0.417605 | 0.445312 | 0.431283 |
| CFLAR-AS1__antise   | 0        | 0        | 0        | 0        | 0        | 32.271   | 0        | 0        | 0        | #NUM!    | #DIV/0!  | #DIV/0!  | 0.42265  | #DIV/0!  | 0.42265  |
| CHCHD3P3__pseud     | 9.16162  | 7.7763   | 6.09413  | 6.75258  | 8.22009  | 17.0735  | 6.05859  | 8.98655  | 7.97626  | -0.47651 | 0.000667 | 0.477176 | 0.537367 | 0.998393 | 0.430913 |
| CHEK2P2__pseudoc    | 0        | 0        | 2.98304  | 3.16285  | 4.17144  | 3.72894  | 1.53271  | 0        | 0        | -1.89092 | 0.960699 | 2.851616 | 0.117763 | 0.750326 | 0.055828 |
| CHIAP2__pseudoge    | 0        | 0        | 0        | 0        | 0.089966 | 0.060428 | 0.235711 | 0        | 0.04579  | #NUM!    | #NUM!    | -0.9044  | 0.198811 | 0.323146 | 0.70048  |
| CHIAP3__pseudoge    | 0.240936 | 0.074767 | 0.139159 | 0        | 24.3852  | 248.682  | 0.323358 | 0.027729 | 1.21535  | -9.22961 | -1.78399 | 7.445626 | 0.369746 | 0.405972 | 0.369624 |
| CHL1-AS1__antisen   | 0        | 0        | 0        | 0        | 0        | 7.44449  | 0        | 0        | 0        | #NUM!    | #DIV/0!  | #DIV/0!  | 0.42265  | #DIV/0!  | 0.42265  |
| CHODL-AS1__lincR    | 0        | 0        | 1.94071  | 0        | 2.26809  | 44.9238  | 0.084947 | 0        | 0        | -4.60388 | 4.513885 | 9.117767 | 0.393029 | 0.448449 | 0.395364 |
| CICP27__pseudoger   | 0        | 0.207029 | 3.28051  | 2.04799  | 1.97091  | 2.14044  | 0.959525 | 0.220799 | 0.930796 | -0.82057 | 0.724201 | 1.544767 | 0.474152 | 0.686903 | 0.021971 |
| CITF22-49D8.1__linc | 0.046321 | 0.023407 | 0.106071 | 0.105754 | 3.49589  | 95.6924  | 0.064984 | 0.014487 | 0.021651 | -9.14164 | 0.79783  | 9.939466 | 0.401711 | 0.503957 | 0.40179  |
| CITF22-92A6.1__linc | 0        | 0        | 0        | 0        | 1.63248  | 4.28603  | 0        | 0        | 0.537995 | #NUM!    | #NUM!    | 3.459569 | 0.254959 | 0.42265  | 0.24013  |
| CKMT2-AS1__antise   | 15.6378  | 27.227   | 8.27717  | 5.38236  | 19.8487  | 57.3175  | 5.61444  | 9.77255  | 30.454   | -0.69074 | 0.15787  | 0.848605 | 0.641942 | 0.897809 | 0.261357 |
| CLDN10-AS1__antis   | 0        | 3.62324  | 1.7159   | 5.29593  | 115.336  | 12.3309  | 4.18512  | 3.30115  | 1.53235  | -4.63827 | -0.7563  | 3.881972 | 0.344107 | 0.494384 | 0.364254 |
| CLRN1-AS1__antise   | 0.044065 | 0.088437 | 0.699914 | 3.95724  | 6.71424  | 66.9794  | 3.10693  | 0        | 0.12357  | -6.54355 | -1.95638 | 4.587173 | 0.335311 | 0.555936 | 0.360592 |
| CLSTN2-AS1__antis   | 0        | 0        | 0.110005 | 0        | 0.667256 | 15.6685  | 0.04311  | 0        | 0        | -7.21432 | 1.351475 | 8.565795 | 0.398442 | 0.673114 | 0.400197 |
| CLUHP3__pseudoge    | 1.88898  | 5.40643  | 1.42265  | 1.97639  | 1.96635  | 7.09403  | 1.22343  | 1.65014  | 2.64811  | -0.34024 | 0.6589   | 0.999139 | 0.798197 | 0.539425 | 0.295592 |
| COL18A1-AS1__anti   | 0        | 0.120425 | 0.076725 | 0.033983 | 0.027187 | 9.77181  | 0.066837 | 0        | 0        | -5.64026 | 1.560567 | 7.200829 | 0.426208 | 0.52279  | 0.42299  |
| COL6A4P1__pseudoc   | 14.2578  | 6.73198  | 3.8017   | 6.576    | 6.32791  | 3.09908  | 7.12853  | 8.23521  | 7.64635  | 0.631503 | 0.107578 | -0.52393 | 0.343119 | 0.875156 | 0.184682 |
| COL6A4P2__pseudoc   | 0.737673 | 0.682177 | 0.677891 | 1.65962  | 100.76   | 24.3389  | 0.735169 | 1.50653  | 0.067646 | -5.9171  | -0.13865 | 5.778455 | 0.300153 | 0.880886 | 0.296837 |
| COX10-AS1__proces   | 7.05755  | 3.34105  | 4.9074   | 4.9153   | 819.523  | 183.916  | 3.56225  | 4.2415   | 4.22734  | -6.04176 | 0.34733  | 6.389091 | 0.31385  | 0.485215 | 0.310981 |
| CPB2-AS1__antisen   | 0        | 5.23658  | 1.44719  | 0.108793 | 2.96834  | 29.1668  | 3.5467   | 0.090834 | 3.08687  | -2.27029 | -0.00874 | 2.261549 | 0.469405 | 0.996369 | 0.443222 |
| CPEB2-AS1__lincRN   | 4.84436  | 4.97254  | 6.11996  | 2.11836  | 9.58036  | 85.4114  | 2.52866  | 5.06266  | 3.89188  | -2.60725 | 0.472843 | 3.080097 | 0.41029  | 0.200161 | 0.394496 |
| CPHL1P__pseudoge    | 0        | 0        | 0.286655 | 3.42122  | 3.76398  | 29.2433  | 0.491039 | 0        | 0.205627 | -6.98961 | -1.28115 | 5.708457 | 0.290255 | 0.524353 | 0.298947 |
| CRHR1-IT1__pseudoc  | 0        | 5.20106  | 0        | 0        | 13.7506  | 24.8775  | 0        | 0        | 0        | -2.89277 | #DIV/0!  | #DIV/0!  | 0.26635  | 0.42265  | 0.215405 |
| CRNDE__lincRNA      | 1.88336  | 6.06136  | 19.7831  | 0.277152 | 4.72369  | 21.7368  | 21.2173  | 2.82806  | 7.17221  | 0.052462 | -0.17102 | -0.22349 | 0.800193 | 0.913559 | 0.898877 |

|                         |          |          |          |          |          |          |          |          |          |          |          |          |          |          |          |
|-------------------------|----------|----------|----------|----------|----------|----------|----------|----------|----------|----------|----------|----------|----------|----------|----------|
| CROCCP2__lincRNA        | 0        | 1.78069  | 1.90855  | 0        | 436.043  | 13.2428  | 4.82739  | 0        | 0        | -6.92817 | -0.38792 | 6.540246 | 0.407783 | 0.880262 | 0.411814 |
| CROCCP3__pseudo         | 1.39462  | 2.6541   | 1.55535  | 4.54713  | 6.88146  | 810.812  | 1.68013  | 2.09484  | 2.4216   | -7.19694 | -0.14499 | 7.051947 | 0.417397 | 0.680268 | 0.417197 |
| CRYBB2P1__pseudo        | 0.169621 | 4.69422  | 3.80058  | 17.8486  | 15.9156  | 56.3324  | 5.46124  | 3.3866   | 2.7838   | -3.3783  | -0.42488 | 2.953418 | 0.168634 | 0.69104  | 0.196387 |
| CSN1S2AP__pseudo        | 0        | 0        | 0        | 0        | 2.09363  | 0        | 0        | 0        | 0        | #NUM!    | #DIV/0!  | #DIV/0!  | 0.42265  | #DIV/0!  | 0.42265  |
| CSNK1A1P1__pseudo       | 0        | 0.490199 | 0.415965 | 0.215801 | 1.75497  | 5.53662  | 0.389488 | 0.276332 | 0.570095 | -3.05047 | -0.44774 | 2.602732 | 0.278035 | 0.595203 | 0.301653 |
| CSPG4P10__pseudo        | 1.99338  | 0.928158 | 1.51961  | 4.32525  | 1.1523   | 1.65276  | 0.861683 | 2.24546  | 2.92214  | -0.68303 | -0.44105 | 0.241978 | 0.33831  | 0.589251 | 0.834778 |
| CSPG4P8__pseudo         | 0        | 0        | 0        | 0        | 0.21626  | 0        | 0        | 0        | 0        | #NUM!    | #DIV/0!  | #DIV/0!  | 0.42265  | #DIV/0!  | 0.42265  |
| CST13P__pseudogene      | 0        | 0.33873  | 1.68504  | 0.07305  | 1.67751  | 2.89195  | 0.277901 | 0.155076 | 0        | -1.19786 | 2.224683 | 3.422543 | 0.161886 | 0.46529  | 0.257815 |
| CSTF3-AS1__antisense    | 0        | 0        | 0.923757 | 5.25563  | 8.09583  | 13.8196  | 0.07253  | 0.09703  | 0        | -4.87841 | 2.445722 | 7.324135 | 0.059231 | 0.532627 | 0.071384 |
| CT49__lincRNA           | 0        | 0        | 1.18416  | 2.96916  | 29.6113  | 208.562  | 1.06317  | 0.076187 | 0.06019  | -7.66988 | -0.01863 | 7.651252 | 0.338719 | 0.994265 | 0.342182 |
| CTA-109P11.1__linc      | 0        | 0        | 0.75441  | 0        | 2.19302  | 0        | 0.244264 | 4.45489  | 0        | -1.5395  | -2.63898 | -1.09948 | 0.64186  | 0.496676 | 0.363998 |
| CTA-125H2.2__antisense  | 0        | 0        | 0        | 0        | 2.25625  | 12.8705  | 0.125034 | 6.04541  | 0        | #NUM!    | #NUM!    | 1.293656 | 0.33163  | 0.410835 | 0.614607 |
| CTA-126B4.7__lincRNA    | 0.390192 | 0        | 0.678117 | 31.3395  | 5.75507  | 14.2177  | 0.657679 | 0.209821 | 0        | -5.5859  | 0.300393 | 5.886296 | 0.153487 | 0.847162 | 0.150092 |
| CTA-134P22.2__antisense | 0.770389 | 0.089974 | 0.499762 | 0.470908 | 0.90421  | 46.0483  | 1.29222  | 1.16472  | 0.708869 | -5.12379 | -1.21884 | 3.904954 | 0.416231 | 0.140476 | 0.436527 |
| CTA-150C2.13__linc      | 0        | 0.123359 | 0.052135 | 0        | 0        | 8.65096  | 0        | 0.170125 | 0.112833 | -5.62336 | -0.68916 | 4.9342   | 0.430991 | 0.190279 | 0.434266 |
| CTA-211A9.5__lincRNA    | 3.29871  | 2.56539  | 5.9034   | 16.0284  | 10.7243  | 115.125  | 1.67345  | 27.8564  | 0.75992  | -3.59177 | -1.36402 | 2.227745 | 0.318729 | 0.58647  | 0.447129 |
| CTA-217C2.1__lincRNA    | 13.6847  | 6.15919  | 8.68579  | 6.87372  | 8.59412  | 238.001  | 7.29032  | 11.8457  | 14.7092  | -3.15127 | -0.24649 | 2.904784 | 0.433949 | 0.70673  | 0.432195 |
| CTA-221G9.11__antisense | 0        | 1.77259  | 0.139633 | 0        | 4.57763  | 0.09938  | 0.306936 | 0        | 0        | -1.29034 | 2.639241 | 3.929577 | 0.430993 | 0.486353 | 0.450191 |
| CTA-221G9.7__lincRNA    | 0        | 0        | 0.328411 | 0        | 0.859628 | 0        | 0        | 0        | 0.088496 | -1.38821 | 1.891812 | 3.280022 | 0.666714 | 0.42265  | 0.484809 |
| CTA-250D10.23__linc     | 0.12112  | 0        | 0.030266 | 0.080029 | 1.47532  | 0.373999 | 0.147927 | 2.38776  | 0        | -3.67181 | -4.06607 | -0.39426 | 0.322613 | 0.423569 | 0.645839 |
| CTA-280A3__B.2__linc    | 0        | 0        | 0        | 0        | 2.44945  | 0.781107 | 0        | 0        | 0        | #NUM!    | #DIV/0!  | #DIV/0!  | 0.274532 | #DIV/0!  | 0.274532 |
| CTA-292E10.6__antisense | 101.917  | 28.7435  | 45.1625  | 38.5807  | 31.5562  | 18.9051  | 21.3699  | 52.1081  | 28.9958  | 0.981566 | 0.778869 | -0.2027  | 0.269859 | 0.504186 | 0.729257 |
| CTA-342B11.1__linc      | 0        | 0        | 1.01194  | 0.330339 | 2.10673  | 1.71414  | 0.541371 | 0.382826 | 0.090869 | -2.03641 | -0.00445 | 2.031958 | 0.192709 | 0.99841  | 0.238346 |
| CTA-363E6.2__lincRNA    | 0.218973 | 0.764436 | 1.27775  | 6.46205  | 6.03073  | 17.4246  | 1.78111  | 1.82159  | 1.66478  | -3.72585 | -1.22005 | 2.505799 | 0.117586 | 0.098582 | 0.161393 |
| CTA-384D8.31__antisense | 1.19422  | 0        | 0        | 0        | 0        | 3.33118  | 0        | 0        | 0        | -1.47996 | #DIV/0!  | #DIV/0!  | 0.651355 | 0.42265  | 0.42265  |
| CTA-407F11.8__antisense | 0.076572 | 0.045147 | 0        | 0        | 0.102369 | 0.123774 | 0.150194 | 0        | 0.027798 | -0.89368 | -0.54826 | 0.345424 | 0.614493 | 0.641898 | 0.86475  |
| CTA-445C9.14__antisense | 0.474018 | 0.279494 | 0.986615 | 0.623391 | 8.75474  | 0        | 0.43564  | 0.608323 | 0.741758 | -2.43011 | -0.03731 | 2.392794 | 0.483254 | 0.936072 | 0.464271 |
| CTA-481E9.4__lincRNA    | 0        | 0        | 0.740312 | 50.2703  | 29.7198  | 989.714  | 1.08749  | 0.192582 | 0.09582  | -10.4968 | -0.89416 | 9.602629 | 0.377038 | 0.713029 | 0.377774 |
| CTA-833B7.2__antisense  | 2.87305  | 0.682751 | 0.909096 | 2.37831  | 4.30774  | 41.8621  | 0.728077 | 3.38949  | 7.79116  | -3.44272 | -1.41532 | 2.027397 | 0.380985 | 0.441858 | 0.380077 |
| CTA-929C8.5__lincRNA    | 0        | 0.009736 | 0.074436 | 0        | 4.10587  | 1.84532  | 0.553058 | 0        | 0        | -6.1437  | -2.71603 | 3.427675 | 0.240944 | 0.514966 | 0.312815 |
| CTA-929C8.7__lincRNA    | 0.051218 | 0.02013  | 0.228074 | 0.030326 | 8.32964  | 19.1934  | 0.201233 | 0.208811 | 0.29456  | -6.5239  | -1.23463 | 5.289272 | 0.240066 | 0.064463 | 0.246436 |
| CTA-929C8.8__lincRNA    | 1.67512  | 0        | 0.604683 | 0        | 91.5996  | 6.24032  | 0.670667 | 0        | 0        | -5.42344 | 1.765241 | 7.188683 | 0.398924 | 0.207592 | 0.388977 |
| CTA-992D9.7__lincRNA    | 0        | 0        | 0.084328 | 0        | 0        | 18.3223  | 0        | 0        | 0        | -7.76337 | #DIV/0!  | #DIV/0!  | 0.42265  | 0.42265  | 0.42265  |
| CTAGE7P__pseudo         | 0        | 0        | 0        | 0.177066 | 0        | 0        | 0.517797 | 0.206656 | 0        | #NUM!    | #NUM!    | -2.0326  | 0.42265  | 0.249769 | 0.206946 |
| CTB-102L5.7__sense      | 0.08019  | 0.132393 | 0.208688 | 0.106466 | 2.46993  | 0.5061   | 0.345798 | 0.087616 | 0.296715 | -2.87128 | -0.7934  | 2.077875 | 0.347999 | 0.37073  | 0.434919 |

|                    |          |          |          |          |          |          |          |          |          |          |          |          |          |          |          |
|--------------------|----------|----------|----------|----------|----------|----------|----------|----------|----------|----------|----------|----------|----------|----------|----------|
| CTB-147C22.8__ant  | 0        | 0        | 2.68413  | 0.12166  | 2.4184   | 23.1152  | 6.17217  | 0        | 0        | -3.25673 | -1.20132 | 2.055405 | 0.355383 | 0.700794 | 0.531623 |
| CTB-147C22.9__ant  | 13.6373  | 2.66864  | 4.38642  | 6.79034  | 4.71849  | 33.1522  | 8.614    | 9.4732   | 12.6075  | -1.10992 | -0.56889 | 0.541027 | 0.533126 | 0.510398 | 0.619045 |
| CTB-151G24.1__linc | 1.07184  | 0.180011 | 1.36023  | 0.715672 | 0.22055  | 4.5881   | 2.11435  | 1.11948  | 1.43495  | -1.0806  | -0.83785 | 0.242752 | 0.482287 | 0.155061 | 0.861432 |
| CTB-167G5.6__pseu  | 0        | 0        | 0        | 0        | 3.45641  | 11.6574  | 0.548618 | 0        | 0        | #NUM!    | #NUM!    | 4.783922 | 0.282347 | 0.42265  | 0.3091   |
| CTB-171A8.1__antis | 0.721892 | 8.55095  | 2.59435  | 277.243  | 29.1231  | 214.34   | 5.60443  | 5.11068  | 0        | -5.45542 | 0.147332 | 5.602751 | 0.15796  | 0.897856 | 0.151096 |
| CTB-175E5.7__antis | 11.3552  | 9.0799   | 8.16939  | 6.82539  | 10.3683  | 10.5064  | 5.21502  | 12.6917  | 14.9044  | 0.046351 | -0.19794 | -0.24429 | 0.900683 | 0.75226  | 0.435587 |
| CTB-175P5.4__lincR | 0.042826 | 0.067337 | 0.319901 | 0.906181 | 0.243522 | 4.14759  | 0.400211 | 0.584866 | 1.10285  | -3.62263 | -2.27945 | 1.343184 | 0.284563 | 0.046907 | 0.403304 |
| CTB-176F20.3__anti | 1.4963   | 1.29347  | 1.55274  | 3.2111   | 1.90094  | 7.67472  | 1.8723   | 1.92483  | 1.59481  | -1.55805 | -0.31228 | 1.245774 | 0.236633 | 0.176831 | 0.31422  |
| CTB-179K24.3__anti | 1.7975   | 1.68451  | 1.37883  | 0.997142 | 2.63495  | 9.93164  | 1.07565  | 1.60271  | 1.75374  | -1.48048 | 0.133215 | 1.613692 | 0.418622 | 0.697209 | 0.360421 |
| CTB-180A7.3__antis | 6.32127  | 6.08258  | 5.46068  | 3.47139  | 10.93    | 19.4674  | 1.93791  | 5.54597  | 5.07048  | -0.92286 | 0.508909 | 1.431768 | 0.387803 | 0.308453 | 0.203349 |
| CTB-180A7.8__lincR | 10.8145  | 13.684   | 15.3147  | 7.13272  | 14.7289  | 7.20848  | 4.37054  | 12.1367  | 14.7053  | 0.453711 | 0.351121 | -0.10259 | 0.308083 | 0.253865 | 0.852737 |
| CTB-187M2.3__lincF | 0        | 0        | 0        | 0        | 2.58349  | 6.08956  | 0        | 0        | 0        | #NUM!    | #DIV/0!  | #DIV/0!  | 0.243016 | #DIV/0!  | 0.243016 |
| CTB-191D16.1__pro  | 0        | 0        | 0        | 0        | 0        | 3.35706  | 0        | 0        | 0.857053 | #NUM!    | #NUM!    | 1.969742 | 0.42265  | 0.42265  | 0.42265  |
| CTB-22K21.2__antis | 0        | 0        | 0        | 0        | 0        | 12.6556  | 1.08435  | 0        | 0        | #NUM!    | #NUM!    | 3.544874 | 0.42265  | 0.42265  | 0.474045 |
| CTB-31O20.2__lincF | 0.195244 | 0.17271  | 0.170858 | 0.613957 | 0.025985 | 2.19769  | 0.238756 | 0.346086 | 0.424147 | -2.39683 | -0.90506 | 1.491777 | 0.36032  | 0.124369 | 0.426476 |
| CTB-31O20.4__proc  | 0        | 0        | 0        | 0        | 0        | 0        | 0        | 0        | 0        | #DIV/0!  | #DIV/0!  | #DIV/0!  | #DIV/0!  | #DIV/0!  | #DIV/0!  |
| CTB-32O4.2__lincR  | 0.122856 | 0.269285 | 0.802193 | 0        | 7.59741  | 0        | 1.44176  | 0        | 0.261047 | -2.6693  | -0.51171 | 2.157593 | 0.498596 | 0.797654 | 0.560156 |
| CTB-50L17.16__linc | 7.9384   | 4.94572  | 6.37306  | 2.82614  | 66.5216  | 26.0621  | 1.77707  | 9.30279  | 7.01814  | -2.30874 | 0.089566 | 2.398308 | 0.322012 | 0.911636 | 0.259938 |
| CTB-52I2.4__pseudc | 13.9025  | 9.9562   | 11.4871  | 14.9577  | 7.12332  | 5.02905  | 6.69983  | 22.0621  | 14.5829  | 0.38271  | -0.29432 | -0.67703 | 0.333167 | 0.679794 | 0.520827 |
| CTB-55O6.12__antis | 2.13768  | 0.705462 | 23.3658  | 105.236  | 9.9483   | 16.7206  | 1.44388  | 3.66094  | 5.30189  | -2.33137 | 1.332545 | 3.663912 | 0.411678 | 0.501921 | 0.329426 |
| CTB-58E17.1__lincR | 0.155923 | 0.153222 | 0.390281 | 0.189952 | 0.416867 | 0.27373  | 0.912422 | 0.198874 | 0.396211 | -0.33223 | -1.10792 | -0.77569 | 0.639732 | 0.384422 | 0.526532 |
| CTB-60E11.9__antis | 0.275815 | 0.095666 | 0.113674 | 0.021539 | 0.242606 | 0.387831 | 0.222601 | 0.248167 | 0.052968 | -0.42637 | -0.11039 | 0.315981 | 0.760268 | 0.870909 | 0.81046  |
| CTB-61M7.1__proce  | 0.002747 | 0.127713 | 1.29178  | 0.210713 | 663.926  | 5.41348  | 1.12885  | 0.099002 | 0.104416 | -8.87888 | 0.09428  | 8.973164 | 0.418895 | 0.968262 | 0.41885  |
| CTB-91J4.1__antise | 0        | 0.063832 | 0.033135 | 0.156083 | 208.446  | 11.5131  | 0.06199  | 0.671257 | 0.206526 | -11.1485 | -3.27675 | 7.87173  | 0.391334 | 0.233375 | 0.39187  |
| CTB-92J24.3__antis | 0.102591 | 0.141115 | 0.693525 | 0.077091 | 5.02558  | 73.0158  | 0.166966 | 0.205459 | 1.36355  | -6.38106 | -0.88922 | 5.491846 | 0.385261 | 0.318025 | 0.385923 |
| CTB-96E2.3__proce  | 123.582  | 4.50486  | 6.8401   | 4.82496  | 3.47869  | 18.483   | 5.58717  | 10.0849  | 14.1482  | 2.332593 | 2.177813 | -0.15478 | 0.476792 | 0.487266 | 0.77936  |
| CTBP1-AS2__antise  | 14.2303  | 9.9246   | 8.85789  | 7.03098  | 48.4548  | 39.2958  | 4.83637  | 14.0071  | 10.9886  | -1.52158 | 0.146161 | 1.667743 | 0.2814   | 0.82447  | 0.159983 |
| CTC-241F20.3__anti | 0        | 0        | 0        | 0        | 0        | 2.46929  | 0        | 0        | 0        | #NUM!    | #DIV/0!  | #DIV/0!  | 0.42265  | #DIV/0!  | 0.42265  |
| CTC-260E6.2__pseu  | 432.123  | 132.019  | 11.151   | 154.459  | 32.5054  | 13.0162  | 10.6104  | 5.01352  | 90.2263  | 1.524437 | 2.442273 | 0.917836 | 0.265379 | 0.394037 | 0.67174  |
| CTC-260E6.6__antis | 1.72951  | 4.86069  | 2.81355  | 4.92348  | 28.3415  | 73.0158  | 0.778384 | 2.96493  | 1.07944  | -3.4985  | 0.963379 | 4.46188  | 0.24512  | 0.034607 | 0.233224 |
| CTC-261N6.1__lincR | 0        | 0        | 7.605    | 0        | 0.070765 | 3.17223  | 0        | 0        | 0        | 1.229622 | #DIV/0!  | #DIV/0!  | 0.431939 | 0.42265  | 0.409917 |
| CTC-265F19.2__sen  | 0        | 0.084216 | 0.178661 | 0.071065 | 0        | 6.33703  | 0.069959 | 0.038998 | 0.038841 | -4.60743 | 0.830757 | 5.438191 | 0.423975 | 0.591769 | 0.426134 |
| CTC-273B12.5__ant  | 0        | 0        | 1.83158  | 0        | 9.81941  | 1.87488  | 0.724058 | 0        | 0        | -2.67464 | 1.338912 | 4.013555 | 0.420109 | 0.675335 | 0.368086 |
| CTC-277H1.7__proc  | 0.163002 | 0.019223 | 0.228408 | 0.064918 | 1.80166  | 6.7724   | 2.10212  | 0        | 0.124166 | -4.39494 | -2.43872 | 1.956222 | 0.299637 | 0.460216 | 0.484564 |
| CTC-297N7.11__ant  | 0        | 0        | 0.207294 | 0        | 63.6557  | 11.0808  | 0        | 0        | 0.025058 | -8.49399 | 3.048352 | 11.54234 | 0.333679 | 0.42265  | 0.33237  |

|                     |          |          |          |          |          |          |          |          |          |          |          |          |          |          |          |
|---------------------|----------|----------|----------|----------|----------|----------|----------|----------|----------|----------|----------|----------|----------|----------|----------|
| CTC-297N7.1__lincR  | 0        | 0.082975 | 0.419954 | 0        | 8.81394  | 4.7563   | 0.136194 | 0        | 0.151125 | -4.75395 | 0.807702 | 5.561649 | 0.226096 | 0.60175  | 0.228903 |
| CTC-297N7.5__antis  | 5.45477  | 1.07108  | 4.04977  | 2.60001  | 42.5527  | 579.152  | 2.21235  | 3.71154  | 0.997194 | -5.88344 | 0.611672 | 6.495109 | 0.385476 | 0.592455 | 0.384862 |
| CTC-301O7.4__lincF  | 0        | 0        | 1.47616  | 0        | 1.37452  | 8.60781  | 0.506074 | 0        | 0.820684 | -2.75753 | 0.153944 | 2.911471 | 0.323819 | 0.895838 | 0.369321 |
| CTC-325H20.2__linc  | 0.201267 | 0        | 0.028744 | 0.917034 | 0        | 2.76547  | 0.14051  | 1.08427  | 1.24823  | -4.00091 | -3.4265  | 0.574419 | 0.295351 | 0.206952 | 0.654317 |
| CTC-325J23.3__linc  | 0.565537 | 0        | 0        | 0        | 1.70879  | 4.18136  | 0.54508  | 0        | 0.403102 | -3.38061 | -0.74554 | 2.635068 | 0.324702 | 0.452654 | 0.317794 |
| CTC-340D7.1__lincF  | 0        | 0        | 0        | 0        | 8.3839   | 37.7646  | 0.604527 | 0        | 0        | #NUM!    | #NUM!    | 6.254333 | 0.311244 | 0.42265  | 0.32035  |
| CTC-347C20.1__linc  | 0        | 0        | 0        | 0        | 3.38061  | 16.036   | 0.67388  | 0        | 0        | #NUM!    | #NUM!    | 4.848656 | 0.315971 | 0.42265  | 0.340269 |
| CTC-347C20.2__linc  | 0        | 0        | 0.805014 | 0        | 17.9124  | 20.9745  | 0.868263 | 0        | 0.155053 | -5.59413 | -0.34617 | 5.247961 | 0.184934 | 0.883793 | 0.204443 |
| CTC-360P9.4__lincR  | 0        | 0.065698 | 1.63045  | 2.29607  | 42.5122  | 7.44449  | 1.01893  | 0        | 0.073208 | -4.94517 | 0.635107 | 5.58028  | 0.319675 | 0.812728 | 0.315712 |
| CTC-360P9.5__lincR  | 0        | 0        | 0        | 0        | 29.1989  | 41.6074  | 0        | 0        | 0        | #NUM!    | #DIV/0!  | #DIV/0!  | 0.19576  | #DIV/0!  | 0.19576  |
| CTC-378H22.1__ant   | 0.154781 | 0.060881 | 0.783902 | 0        | 0.380526 | 1.79661  | 0.351264 | 0.391876 | 0.055695 | -1.12306 | 0.323401 | 1.446461 | 0.366487 | 0.859301 | 0.551944 |
| CTC-378H22.2__ant   | 0.107928 | 0.090911 | 1.75438  | 0        | 1.71062  | 3.90629  | 0.3738   | 0.033696 | 0.134253 | -1.52392 | 1.850157 | 3.37408  | 0.215278 | 0.503947 | 0.293069 |
| CTC-400I9.1__lincRI | 0        | 0        | 0        | 0        | 0        | 0.84703  | 0.740406 | 0        | 0        | #NUM!    | #NUM!    | 0.194096 | 0.42265  | 0.42265  | 0.945281 |
| CTC-419K13.1__linc  | 0        | 0        | 3.04718  | 0        | 92.1606  | 238.001  | 0.790214 | 0        | 0        | -6.75955 | 1.947159 | 8.706713 | 0.251693 | 0.586064 | 0.254915 |
| CTC-429P9.1__antis  | 1.36667  | 1.41047  | 3.89557  | 2.05621  | 2.96322  | 33.432   | 1.34491  | 1.00413  | 1.7993   | -2.52669 | 0.685739 | 3.212431 | 0.379845 | 0.317484 | 0.375265 |
| CTC-436P18.1__ant   | 17.4703  | 13.3937  | 11.1211  | 7.5697   | 16.2527  | 48.6284  | 8.17253  | 14.8386  | 13.054   | -0.78712 | 0.219273 | 1.006397 | 0.547798 | 0.644186 | 0.410034 |
| CTC-444N24.11__lin  | 4.96192  | 16.0676  | 11.1613  | 9.65359  | 7.84951  | 16.6557  | 2.53464  | 3.76097  | 8.00787  | -0.08561 | 1.170283 | 1.255891 | 0.896165 | 0.201543 | 0.038618 |
| CTC-457E21.1__sen   | 0.026089 | 0        | 0.052264 | 0.194895 | 0.23925  | 4.17412  | 0.124495 | 0.267617 | 0.119917 | -5.87808 | -2.70816 | 3.169926 | 0.367088 | 0.145603 | 0.416766 |
| CTC-457E21.3__pse   | 0.044369 | 0.087203 | 0.340515 | 0.176792 | 0.754081 | 1.20615  | 0.234301 | 0.064652 | 0        | -2.17848 | 0.659132 | 2.837611 | 0.126707 | 0.74406  | 0.2368   |
| CTC-457E21.9__ant   | 0.026102 | 0.032115 | 0.061395 | 0.095213 | 2.71362  | 15.6394  | 0.023404 | 0.116768 | 0.03218  | -7.26897 | -0.52698 | 6.741989 | 0.330559 | 0.660145 | 0.333105 |
| CTC-458G6.2__lincF  | 0.049579 | 0        | 0.24732  | 0        | 0.418224 | 0.560376 | 0        | 0        | 0        | -1.72075 | #DIV/0!  | #DIV/0!  | 0.24998  | 0.320432 | 0.191984 |
| CTC-458I2.2__antise | 1.44747  | 2.99154  | 2.75899  | 2.77516  | 6.02699  | 10.1344  | 7.45476  | 3.07882  | 1.94213  | -1.39551 | -0.79345 | 0.602052 | 0.161789 | 0.497446 | 0.622625 |
| CTC-459F4.1__lincR  | 0.111001 | 0.675445 | 0.484472 | 0.221648 | 0.110444 | 0.444132 | 0.195573 | 0.616706 | 0.104969 | 0.711326 | 0.470487 | -0.24084 | 0.50513  | 0.480725 | 0.866509 |
| CTC-459F4.5__lincR  | 0.072984 | 0        | 0.441584 | 0        | 3.72558  | 3.14723  | 0        | 0        | 0.158114 | -3.73947 | 1.702397 | 5.441863 | 0.202833 | 0.29693  | 0.188371 |
| CTC-459I6.1__antise | 0        | 0        | 0.427431 | 0.070261 | 8.59412  | 6.01504  | 0.850834 | 0        | 0        | -5.10196 | -0.99319 | 4.108774 | 0.197317 | 0.743267 | 0.240997 |
| CTC-462L7.1__lincR  | 3.82006  | 1.05915  | 2.27711  | 0.622959 | 1.6662   | 1.56064  | 0.194856 | 12.3812  | 2.69863  | 0.894435 | -1.09385 | -1.98829 | 0.427092 | 0.605982 | 0.388325 |
| CTC-465D4.1__lincF  | 0.842986 | 0        | 0        | 0        | 0        | 0.214324 | 0        | 0        | 0        | 1.975715 | #DIV/0!  | #DIV/0!  | 0.582713 | 0.42265  | 0.42265  |
| CTC-467M3.1__antis  | 0.597063 | 0        | 1.01975  | 0.206501 | 9.04391  | 1277.67  | 0        | 0        | 0.113252 | -9.63655 | 3.835544 | 13.4721  | 0.418751 | 0.200264 | 0.418484 |
| CTC-471C19.1__linc  | 0        | 0        | 0        | 0        | 3.1693   | 0.054216 | 0.07397  | 0        | 0        | #NUM!    | #NUM!    | 5.445543 | 0.412859 | 0.42265  | 0.426488 |
| CTC-471F3.4__pseu   | 22.2555  | 25.3111  | 32.5022  | 16.3413  | 9.42315  | 4.43395  | 23.1089  | 70.6785  | 42.0133  | 1.406768 | -0.76218 | -2.16895 | 0.121926 | 0.305958 | 0.155335 |
| CTC-471J1.8__proce  | 2.47145  | 2.1635   | 2.64451  | 53.5938  | 9.20424  | 21.7368  | 2.77562  | 3.70591  | 2.39025  | -3.53764 | -0.28539 | 3.252251 | 0.189375 | 0.422731 | 0.200709 |
| CTC-479C5.10__linc  | 0.171231 | 0.202074 | 0.402344 | 0        | 1.32621  | 1.66689  | 0        | 0.061866 | 0        | -1.94816 | 3.648181 | 5.596345 | 0.247185 | 0.102552 | 0.191096 |
| CTC-493L21.1__linc  | 0.028639 | 0        | 0        | 0        | 0.3775   | 0        | 0.056156 | 0.289556 | 0        | -3.72044 | -3.59353 | 0.126908 | 0.467979 | 0.370619 | 0.824109 |
| CTC-493L21.2__linc  | 0        | 0        | 0.082103 | 0        | 0        | 0        | 0        | 0        | 0        | #DIV/0!  | #DIV/0!  | #DIV/0!  | 0.42265  | 0.42265  | #DIV/0!  |
| CTC-497E21.3__linc  | 2.30546  | 0.259267 | 2.77456  | 2.23184  | 1.99042  | 0.800791 | 1.02891  | 1.84979  | 0.67529  | 0.088083 | 0.587207 | 0.499124 | 0.930484 | 0.647829 | 0.303419 |

|                     |          |          |          |          |          |          |          |          |          |          |          |          |          |          |          |
|---------------------|----------|----------|----------|----------|----------|----------|----------|----------|----------|----------|----------|----------|----------|----------|----------|
| CTC-498J12.1__linc  | 0.927285 | 0.560313 | 0.282795 | 0.614054 | 1.97766  | 7.82739  | 0.54871  | 0.408443 | 0        | -2.55709 | 0.887248 | 3.444338 | 0.350077 | 0.054033 | 0.315723 |
| CTC-498J12.3__anti  | 0        | 0        | 0        | 0.209107 | 1.61662  | 21.1542  | 0.610787 | 0        | 0.258734 | #NUM!    | #NUM!    | 4.72401  | 0.374675 | 0.243183 | 0.391012 |
| CTC-501O10.1__linc  | 0        | 0        | 1.58968  | 0        | 10.551   | 3.40796  | 0.593575 | 0        | 0.330551 | -3.13438 | 0.782575 | 3.916958 | 0.332986 | 0.723958 | 0.316262 |
| CTC-512J12.4__proc  | 0.88157  | 1.86084  | 3.41765  | 19.0954  | 4.94674  | 12.4628  | 1.35791  | 0.254041 | 0.151676 | -2.56708 | 1.804399 | 4.371474 | 0.148248 | 0.308534 | 0.092211 |
| CTC-513N18.6__linc  | 0        | 0        | 0.979487 | 0        | 48.4548  | 14.0893  | 0        | 0        | 0        | -5.9967  | #DIV/0!  | #DIV/0!  | 0.291902 | 0.42265  | 0.28441  |
| CTC-513N18.7__linc  | 4.55183  | 1.55187  | 2.39859  | 1.34885  | 42.5527  | 54.707   | 1.00163  | 12.2514  | 1.73201  | -3.53579 | -0.8176  | 2.71819  | 0.218165 | 0.668567 | 0.20891  |
| CTC-523E23.1__linc  | 0.131149 | 0.219083 | 0.164168 | 0.247087 | 0.140365 | 28.8648  | 0.07506  | 0.179296 | 0        | -5.82951 | 1.016044 | 6.845558 | 0.421908 | 0.156484 | 0.419998 |
| CTC-523E23.4__linc  | 0.043291 | 0.153152 | 0.372042 | 0.134182 | 2.05113  | 19.0637  | 0.875463 | 0.157716 | 0        | -5.22413 | -0.8619  | 4.362234 | 0.364493 | 0.70568  | 0.39121  |
| CTC-523E23.5__linc  | 0.894547 | 1.08656  | 4.76526  | 0.89717  | 3.75238  | 76.693   | 0.674284 | 3.77799  | 0.153236 | -3.59183 | 0.55075  | 4.142577 | 0.401641 | 0.768727 | 0.421164 |
| CTC-523E23.8__linc  | 0.028282 | 0.033349 | 0.174178 | 0.062719 | 0.111055 | 0        | 1.1818   | 0.020628 | 0.041101 | 0.440411 | -2.39875 | -2.83916 | 0.815198 | 0.498977 | 0.450259 |
| CTC-524C5.2__antis  | 168.998  | 5.98775  | 58.1757  | 4.07743  | 7.55133  | 17.8286  | 81.6985  | 101.496  | 78.7362  | 2.984629 | -0.16786 | -3.15249 | 0.307335 | 0.873224 | 0.014812 |
| CTC-524C5.5__lincF  | 0        | 0        | 0        | 0        | 0        | 1.63905  | 0        | 0        | 0        | #NUM!    | #DIV/0!  | #DIV/0!  | 0.42265  | #DIV/0!  | 0.42265  |
| CTC-525D6.1__proc   | 0.617132 | 2.93584  | 5.01523  | 105.903  | 52.1805  | 397.891  | 4.19661  | 0        | 0.942378 | -6.01988 | 0.737508 | 6.757391 | 0.228611 | 0.678909 | 0.230113 |
| CTC-529L17.1__linc  | 0        | 0        | 0        | 0        | 43.9205  | 0        | 0        | 0.051725 | 0        | #NUM!    | #NUM!    | 9.729811 | 0.42265  | 0.42265  | 0.42265  |
| CTC-537E7.1__lincR  | 5.67611  | 0        | 0        | 0        | 1.97057  | 0.967422 | 0        | 0        | 0.067833 | 0.950072 | 6.386771 | 5.436699 | 0.74024  | 0.42959  | 0.235025 |
| CTC-548K16.2__linc  | 0        | 0        | 1.50518  | 0        | 4.51173  | 14.2898  | 0.385152 | 0.624788 | 0.70558  | -3.64284 | -0.18871 | 3.454132 | 0.263422 | 0.888114 | 0.302096 |
| CTC-550B14.6__pro   | 2.7902   | 4.60533  | 3.42594  | 1.4311   | 9.04391  | 266.721  | 1.11118  | 1.53836  | 2.22427  | -4.67894 | 1.150775 | 5.829713 | 0.415988 | 0.071225 | 0.405808 |
| CTC-559E9.6__proc   | 15.1818  | 11.4377  | 4.1155   | 17.2303  | 30.7242  | 313.175  | 7.84907  | 48.6319  | 9.75731  | -3.55456 | -1.10778 | 2.446779 | 0.384006 | 0.465195 | 0.440115 |
| CTC-564N23.2__ant   | 0        | 0        | 0        | 2.26927  | 0        | 0        | 0        | 0        | 0        | #NUM!    | #DIV/0!  | #DIV/0!  | 0.42265  | #DIV/0!  | 0.42265  |
| CTC-782O7.1__lincF  | 0.129873 | 0        | 0        | 0        | 285.253  | 25.5918  | 0.083949 | 0        | 0        | -11.2249 | 0.629518 | 11.8544  | 0.373631 | 0.42265  | 0.373538 |
| CTD-2001E22.1__se   | 0.046111 | 0        | 0.115306 | 1.14863  | 4.11194  | 21.9843  | 0.135369 | 0.025156 | 0.050101 | -7.39905 | -0.38389 | 7.015155 | 0.298161 | 0.749384 | 0.301166 |
| CTD-2006C1.12__se   | 1.38551  | 4.58861  | 1.81764  | 2.44366  | 4.63439  | 478.105  | 15.6771  | 6.09673  | 2.54846  | -5.96044 | -1.64226 | 4.318178 | 0.421313 | 0.336746 | 0.44071  |
| CTD-2006C1.2__pro   | 4.04695  | 3.46528  | 1.58973  | 5.06475  | 5.75205  | 28.6779  | 1.46863  | 2.72309  | 0.568386 | -2.11741 | 0.935184 | 3.052593 | 0.354965 | 0.126816 | 0.296351 |
| CTD-2006K23.1__lin  | 0.041703 | 2.75945  | 0.100255 | 0.155423 | 4.94674  | 11.9112  | 0.163756 | 0.045634 | 0.090929 | -2.55184 | 3.272187 | 5.82403  | 0.321734 | 0.447194 | 0.245919 |
| CTD-2008A1.2__pse   | 8.52271  | 1.79631  | 39.5891  | 2.83028  | 1.30916  | 119.48   | 0        | 2.57222  | 26.0466  | -1.30856 | 0.80231  | 2.11087  | 0.468665 | 0.232744 | 0.413288 |
| CTD-2008L17.2__lin  | 0.21526  | 0        | 0.105381 | 0.110878 | 5.26561  | 68.6629  | 1.5366   | 0.067186 | 0.064669 | -7.85119 | -2.37948 | 5.471708 | 0.381009 | 0.41212  | 0.392769 |
| CTD-2008N3.1__linc  | 0        | 0        | 0.065875 | 0        | 2.92074  | 30.5096  | 0.946369 | 0        | 0        | -8.98721 | -3.8446  | 5.142611 | 0.370151 | 0.464135 | 0.388377 |
| CTD-2008P7.3__linc  | 0.093827 | 0.025407 | 0.127168 | 0.014328 | 1.27484  | 3.67051  | 0.238597 | 0.014119 | 0.103527 | -4.33116 | -0.53185 | 3.799312 | 0.275891 | 0.568946 | 0.29871  |
| CTD-2012I17.1__linc | 0        | 0        | 0.851611 | 0        | 1.56944  | 14.6577  | 0        | 0        | 0        | -4.25207 | #DIV/0!  | #DIV/0!  | 0.361133 | 0.42265  | 0.364464 |
| CTD-2012K14.6__lin  | 0.220641 | 0.84901  | 1.25359  | 0.289222 | 7.08369  | 20.0257  | 1.00715  | 0.478488 | 0.594976 | -3.55989 | 0.159129 | 3.719022 | 0.268104 | 0.87157  | 0.288183 |
| CTD-2013M15.1__lir  | 0        | 0.039308 | 0.59709  | 0        | 0        | 7.13846  | 0        | 0.072062 | 0        | -3.48761 | 3.142627 | 6.630238 | 0.426129 | 0.455139 | 0.428507 |
| CTD-2013N24.2__ar   | 20.1469  | 14.5451  | 15.9923  | 7.35665  | 6.63195  | 58.401   | 9.41394  | 17.8956  | 17.313   | -0.51424 | 0.183766 | 0.69801  | 0.721501 | 0.690863 | 0.62415  |
| CTD-2014E2.5__pse   | 0.207598 | 0.408035 | 0.640607 | 0.091835 | 0.935153 | 33.1522  | 0.271201 | 0.510224 | 0.395252 | -4.76593 | 0.094394 | 4.860328 | 0.415425 | 0.831915 | 0.418379 |
| CTD-2015G9.2__linc  | 0        | 0        | 0.040811 | 0        | 13.3016  | 3.36105  | 0.51637  | 0        | 0        | -8.67343 | -3.66136 | 5.012069 | 0.300013 | 0.469934 | 0.321014 |
| CTD-2015H6.3__ant   | 1.33964  | 1.21563  | 0.578728 | 1.67203  | 1.16702  | 8.92307  | 1.3848   | 4.50462  | 2.28599  | -1.90807 | -1.38329 | 0.524785 | 0.403498 | 0.214603 | 0.721465 |

|                     |          |          |          |          |          |          |          |          |          |          |          |          |          |          |          |
|---------------------|----------|----------|----------|----------|----------|----------|----------|----------|----------|----------|----------|----------|----------|----------|----------|
| CTD-2017C7.2__ant   | 0.194548 | 0.458983 | 0.129613 | 1.24174  | 2.94177  | 15.9446  | 0.56999  | 0.353142 | 0.140621 | -4.68379 | -0.44181 | 4.241977 | 0.303815 | 0.584836 | 0.313304 |
| CTD-2017D11.1__lin  | 2.25563  | 3.20737  | 2.46058  | 6.33159  | 2.91144  | 21.5744  | 2.27442  | 16.7735  | 1.5925   | -1.95952 | -1.38125 | 0.578274 | 0.323755 | 0.459899 | 0.761688 |
| CTD-2020K17.1__ar   | 1.99307  | 0.947322 | 1.39175  | 2.22757  | 5.07001  | 131.998  | 10.6324  | 2.33002  | 1.65191  | -5.00693 | -1.75423 | 3.252694 | 0.403687 | 0.321795 | 0.449007 |
| CTD-2020K17.3__ar   | 0        | 0        | 0        | 0        | 0        | 1.06785  | 0        | 0        | 0        | #NUM!    | #DIV/0!  | #DIV/0!  | 0.42265  | #DIV/0!  | 0.42265  |
| CTD-2021J15.1__an   | 14.7073  | 19.1866  | 9.2803   | 4.46612  | 13.563   | 579.152  | 3.94074  | 10.0129  | 5.13204  | -3.78993 | 1.177679 | 4.967606 | 0.438841 | 0.056513 | 0.418562 |
| CTD-2023M8.1__linc  | 5.28134  | 1.34231  | 3.11991  | 19.6582  | 3.37879  | 39.0984  | 2.67085  | 12.9648  | 3.72141  | -2.67289 | -0.99034 | 1.682555 | 0.220363 | 0.534648 | 0.38863  |
| CTD-2023N9.1__ant   | 0.11591  | 0        | 0.727194 | 0        | 22.1628  | 41.8621  | 0.062036 | 0.011526 | 0.022964 | -6.24678 | 3.126735 | 9.373513 | 0.219314 | 0.389795 | 0.220362 |
| CTD-2023N9.2__linc  | 0        | 0        | 0        | 0        | 1.29012  | 3.86043  | 0        | 0        | 0        | #NUM!    | #DIV/0!  | #DIV/0!  | 0.269422 | #DIV/0!  | 0.269422 |
| CTD-2026D20.2__ar   | 0.336023 | 2.0764   | 0.480572 | 5.0508   | 3.66617  | 3.72947  | 1.19868  | 1.64132  | 1.63813  | -2.1051  | -0.63033 | 1.474765 | 0.071805 | 0.393031 | 0.04718  |
| CTD-2026G6.3__linc  | 0        | 0        | 0        | 12.003   | 2.25031  | 2.28311  | 1.10532  | 0        | 0        | #NUM!    | #NUM!    | 3.903111 | 0.231525 | 0.42265  | 0.215702 |
| CTD-2026K11.2__ar   | 16.3693  | 5.08241  | 8.87316  | 5.97323  | 2.44221  | 23.1152  | 5.76065  | 7.28545  | 10.5215  | -0.05625 | 0.363697 | 0.41995  | 0.960955 | 0.644029 | 0.65931  |
| CTD-2029E14.1__lin  | 0        | 0        | 0        | 0        | 0        | 0        | 0.109277 | 0        | 0        | #DIV/0!  | #NUM!    | #NUM!    | #DIV/0!  | 0.42265  | 0.42265  |
| CTD-2031P19.3__ar   | 0.065272 | 0.015394 | 0.33111  | 0.173487 | 0.132622 | 5.36914  | 0.134609 | 0.099901 | 0.113731 | -3.78475 | 0.241773 | 4.026528 | 0.397116 | 0.849242 | 0.414811 |
| CTD-2033A16.2__ps   | 67.4692  | 36.6312  | 12.3396  | 24.6028  | 10.3715  | 11.3374  | 12.5116  | 20.8734  | 14.2773  | 1.330138 | 1.288666 | -0.04147 | 0.194742 | 0.305849 | 0.952111 |
| CTD-2033A16.3__ar   | 17.3282  | 14.8959  | 34.2467  | 13.12    | 8.02265  | 7.74202  | 23.4867  | 25.4829  | 33.684   | 1.202417 | -0.31436 | -1.51677 | 0.216674 | 0.237969 | 0.057692 |
| CTD-2034I21.1__linc | 0        | 0        | 0.179467 | 1.91607  | 1.64352  | 3.81875  | 0.900451 | 0.072468 | 0.216419 | -5.36151 | -2.72837 | 2.633138 | 0.061598 | 0.355118 | 0.119706 |
| CTD-2034I4.1__lincF | 1.65797  | 0.038072 | 1.1198   | 6.5263   | 32.8713  | 308.088  | 0.157604 | 2.20149  | 0.020057 | -6.94724 | 0.24312  | 7.190363 | 0.355497 | 0.911636 | 0.356553 |
| CTD-2037K23.2__lin  | 0.871078 | 0.675899 | 1.07766  | 0.516214 | 0.866149 | 73.2715  | 1.50938  | 0.696036 | 1.14574  | -4.83003 | -0.35254 | 4.477486 | 0.423975 | 0.346884 | 0.429294 |
| CTD-2037L6.2__linc  | 0.02708  | 0.187827 | 0        | 0        | 0        | 0        | 0.158859 | 0        | 0.058792 | #DIV/0!  | -0.0183  | #NUM!    | 0.346171 | 0.993311 | 0.258153 |
| CTD-2044J15.2__lin  | 1.33408  | 4.1383   | 0.345101 | 5.30478  | 4.21733  | 5.27097  | 1.06617  | 1.87574  | 3.37386  | -1.34646 | -0.11856 | 1.227892 | 0.181021 | 0.924094 | 0.058911 |
| CTD-2047H16.4__ar   | 0.597886 | 0        | 1.12805  | 9.68341  | 48.803   | 95.0374  | 5.37099  | 6.69185  | 0.721248 | -6.47494 | -2.8889  | 3.586041 | 0.174935 | 0.224226 | 0.214008 |
| CTD-2049O4.1__ant   | 0        | 0        | 0        | 170.781  | 2.23588  | 18.3927  | 0        | 0        | 0        | #NUM!    | #DIV/0!  | #DIV/0!  | 0.356687 | #DIV/0!  | 0.356687 |
| CTD-2058B24.2__ar   | 0        | 0        | 2.23213  | 31.0202  | 342.304  | 49.4162  | 0        | 0        | 0        | -7.56521 | #DIV/0!  | #DIV/0!  | 0.300204 | 0.42265  | 0.297118 |
| CTD-2061E9.1__linc  | 0        | 0        | 0        | 0        | 1.90125  | 0        | 0.285113 | 0        | 0        | #NUM!    | #NUM!    | 2.737343 | 0.42265  | 0.42265  | 0.514657 |
| CTD-2066L21.1__lin  | 0        | 4.99106  | 0        | 0        | 1.60641  | 2.52512  | 0.238142 | 1.03676  | 0.424118 | 0.27267  | 1.554643 | 1.281973 | 0.882483 | 0.522939 | 0.358671 |
| CTD-2066L21.3__lin  | 66.1938  | 36.148   | 26.4413  | 17.4181  | 13.6958  | 189.602  | 27.5216  | 40.3724  | 38.1371  | -0.77725 | 0.280456 | 1.057703 | 0.690995 | 0.676634 | 0.5704   |
| CTD-2071N1.1__ant   | 0        | 0        | 0.239628 | 0.15805  | 0.634894 | 68.3902  | 0.116984 | 0        | 0        | -8.17348 | 1.034485 | 9.207966 | 0.415959 | 0.73446  | 0.416969 |
| CTD-2072I24.1__linc | 0        | 0        | 0        | 0        | 0        | 3.63543  | 0        | 0        | 0        | #NUM!    | #DIV/0!  | #DIV/0!  | 0.42265  | #DIV/0!  | 0.42265  |
| CTD-2074D8.1__linc  | 0        | 0        | 0        | 0        | 2.37433  | 0.151103 | 0        | 0        | 0        | #NUM!    | #DIV/0!  | #DIV/0!  | 0.387147 | #DIV/0!  | 0.387147 |
| CTD-2078B5.2__linc  | 0.234539 | 0        | 0        | 0.701519 | 0        | 7.14037  | 0        | 0.127071 | 0.436354 | -5.0633  | -1.2644  | 3.798906 | 0.386202 | 0.628722 | 0.376693 |
| CTD-2081K17.2__lin  | 0        | 0.054758 | 0.914927 | 0.143874 | 0.181903 | 30.778   | 2.03751  | 0        | 0.05054  | -5.00343 | -1.10657 | 3.896862 | 0.417422 | 0.708356 | 0.455854 |
| CTD-2083E4.6__ant   | 1.82377  | 0        | 1.63839  | 0        | 0        | 26.7727  | 0.630466 | 0        | 0        | -2.95102 | 2.457182 | 5.4082   | 0.465947 | 0.193406 | 0.436402 |
| CTD-2090I13.1__linc | 0        | 0        | 0.642932 | 1.28635  | 2.35144  | 38.4574  | 0.494197 | 0.083505 | 0.03327  | -6.03285 | 0.073559 | 6.106404 | 0.368692 | 0.976621 | 0.377884 |
| CTD-2091N23.1__lin  | 0.116051 | 0        | 0.553295 | 0        | 0.304939 | 2.42362  | 0        | 0        | 0        | -2.02732 | #DIV/0!  | #DIV/0!  | 0.373799 | 0.316428 | 0.355092 |
| CTD-2102P23.1__ps   | 43.7925  | 57.0395  | 3.61154  | 25.6584  | 1.60293  | 6.41325  | 13.5369  | 57.2659  | 1.63187  | 1.632991 | 0.527971 | -1.10502 | 0.300302 | 0.390513 | 0.608553 |



|                    |          |          |          |          |          |          |          |          |          |          |          |          |          |          |          |
|--------------------|----------|----------|----------|----------|----------|----------|----------|----------|----------|----------|----------|----------|----------|----------|----------|
| CTD-2113L7.1__anti | 1.83958  | 0.102453 | 1.85509  | 7.75446  | 9.28457  | 1277.67  | 3.61965  | 0.451926 | 1.72082  | -8.41351 | -0.60925 | 7.804252 | 0.415839 | 0.366705 | 0.416799 |
| CTD-2118P12.1__lin | 0        | 0        | 0        | 0        | 0        | 5.55285  | 0        | 0        | 0        | #NUM!    | #DIV/0!  | #DIV/0!  | 0.42265  | #DIV/0!  | 0.42265  |
| CTD-2126E3.1__sen  | 0        | 0.051093 | 0.108345 | 0.200936 | 1.73251  | 8.31578  | 0.042406 | 0        | 0.070628 | -6.00637 | 0.496247 | 6.502622 | 0.304877 | 0.649154 | 0.305525 |
| CTD-2127H9.1__linc | 4.51361  | 2.04731  | 7.61888  | 3.23423  | 21.2826  | 337.008  | 1.05255  | 3.15899  | 2.91955  | -4.67219 | 0.991643 | 5.663828 | 0.392217 | 0.315031 | 0.388472 |
| CTD-2128A3.2__linc | 2.09087  | 1.40887  | 0        | 1.86108  | 58.3691  | 16.7206  | 0        | 0        | 0        | -4.45862 | #DIV/0!  | #DIV/0!  | 0.285646 | 0.198579 | 0.268626 |
| CTD-2130O13.1__lin | 1.46749  | 0        | 0.997374 | 0        | 15.6763  | 74.2234  | 1.47828  | 0        | 0        | -5.18874 | 0.737588 | 5.926325 | 0.326024 | 0.428929 | 0.327183 |
| CTD-2134A5.4__linc | 0.108214 | 0.051665 | 0.680294 | 0.554563 | 2.81506  | 10.6844  | 0.455983 | 0.088486 | 0.323044 | -4.06415 | -0.0462  | 4.017955 | 0.265617 | 0.968426 | 0.289449 |
| CTD-2135D7.4__linc | 0        | 0        | 0.195779 | 0        | 0.359638 | 1393.82  | 0.499117 | 0        | 0        | -12.7979 | -1.35015 | 11.44775 | 0.422501 | 0.673347 | 0.422708 |
| CTD-2139B15.5__lin | 0        | 0        | 0.834769 | 0        | 0        | 3.37244  | 0        | 0        | 0        | -2.01434 | #DIV/0!  | #DIV/0!  | 0.42265  | 0.42265  | 0.42265  |
| CTD-2140B24.6__ar  | 1.39254  | 1.81674  | 0        | 2.07866  | 0.896674 | 4.01337  | 1.89787  | 3.66478  | 0        | -1.12278 | -0.79352 | 0.329253 | 0.47726  | 0.290814 | 0.831241 |
| CTD-2140G10.1__lin | 0        | 0        | 1.71128  | 0.727847 | 2.12587  | 6.72608  | 0        | 0        | 0        | -2.48492 | #DIV/0!  | #DIV/0!  | 0.1733   | 0.42265  | 0.220065 |
| CTD-2140G10.2__ar  | 0        | 0        | 0.059188 | 0.0295   | 26.9193  | 8.54113  | 0.415438 | 0        | 0        | -9.22788 | -2.81125 | 6.416633 | 0.275228 | 0.509856 | 0.283035 |
| CTD-2142D14.1__lin | 0.030052 | 0.038938 | 0.189844 | 0.085494 | 0.764139 | 8.77623  | 0.841541 | 0.015062 | 0.064029 | -5.21682 | -1.8306  | 3.38622  | 0.372407 | 0.534906 | 0.427369 |
| CTD-2143L24.1__lin | 0.262989 | 0.6246   | 5.14784  | 0.844375 | 5.27698  | 762.947  | 3.53021  | 0.268688 | 0.084337 | -6.99351 | 0.636197 | 7.629709 | 0.418673 | 0.79416  | 0.420908 |
| CTD-2147F2.1__linc | 6.43966  | 2.33357  | 380.027  | 13.8039  | 78.2708  | 79.6174  | 1.31184  | 0        | 0        | 1.179205 | 8.211293 | 7.032088 | 0.595583 | 0.411379 | 0.124398 |
| CTD-2154B17.1__lin | 0        | 0        | 0        | 0        | 0        | 0        | 0        | 0        | 0        | #DIV/0!  | #DIV/0!  | #DIV/0!  | #DIV/0!  | #DIV/0!  | #DIV/0!  |
| CTD-2161F6.2__linc | 0        | 0        | 0        | 0        | 1.00564  | 85.3553  | 0.67238  | 0        | 0        | #NUM!    | #NUM!    | 7.004958 | 0.415888 | 0.42265  | 0.420454 |
| CTD-2162K18.5__ar  | 4.13887  | 0.889013 | 1.63118  | 5.80043  | 52.1805  | 56.3324  | 2.15777  | 1.18196  | 0.442132 | -4.10153 | 0.816222 | 4.917753 | 0.171336 | 0.286764 | 0.157537 |
| CTD-2165H16.4__ar  | 0.206363 | 0.826359 | 0        | 0.109427 | 1.96544  | 2.35394  | 0.343479 | 1.40347  | 0.134606 | -2.10047 | -0.86547 | 1.234993 | 0.25073  | 0.194298 | 0.360948 |
| CTD-2170G1.2__linc | 0.70456  | 0.029801 | 1.35667  | 0        | 0.25897  | 10.8358  | 0.931216 | 0        | 1.37584  | -2.40759 | -0.14184 | 2.265755 | 0.453272 | 0.456334 | 0.466455 |
| CTD-2171N6.1__linc | 0.272525 | 0.141417 | 0.095681 | 0.101685 | 0.892587 | 17.4485  | 0.046879 | 0.031354 | 0.083296 | -5.17748 | 1.657647 | 6.835129 | 0.403928 | 0.20047  | 0.392943 |
| CTD-2176I21.2__ant | 1.01115  | 0        | 0.070091 | 0        | 10.9278  | 10.391   | 0.081969 | 0.164049 | 0.054477 | -4.30137 | 1.847276 | 6.148642 | 0.224427 | 0.522335 | 0.186854 |
| CTD-2184C24.2__ar  | 0        | 0.012168 | 0.072344 | 0        | 0.911491 | 1.66023  | 0.070881 | 0        | 0        | -4.92744 | 0.253756 | 5.181195 | 0.213101 | 0.922852 | 0.238193 |
| CTD-2184D3.3__linc | 0        | 0        | 2.71784  | 0        | 0.899521 | 5.69013  | 0        | 0        | 0        | -1.27774 | #DIV/0!  | #DIV/0!  | 0.280165 | 0.42265  | 0.339581 |
| CTD-2184D3.5__ant  | 19.8335  | 12.2312  | 18.3301  | 19.9948  | 3.46043  | 110.877  | 9.08467  | 11.6241  | 8.73898  | -1.41446 | 0.775117 | 2.189576 | 0.478696 | 0.161236 | 0.412332 |
| CTD-2184D3.6__linc | 0.207213 | 0.040728 | 2.78578  | 1.38942  | 0.165923 | 5.19907  | 0.118431 | 0.245748 | 0        | -1.15474 | 3.058369 | 4.213111 | 0.201498 | 0.448511 | 0.310748 |
| CTD-2187J20.1__lin | 0        | 0        | 0        | 0        | 0.917628 | 0.355775 | 0.221897 | 0        | 0        | #NUM!    | #NUM!    | 2.520727 | 0.252985 | 0.42265  | 0.398261 |
| CTD-2192J16.11__li | 0        | 0.082559 | 0        | 0        | 0        | 2.35394  | 0.499921 | 0        | 0.15038  | -4.83351 | -2.97761 | 1.855898 | 0.443241 | 0.379824 | 0.564695 |
| CTD-2192J16.15__p  | 0        | 0        | 0        | 0        | 0        | 65.0583  | 0        | 0        | 0        | #NUM!    | #DIV/0!  | #DIV/0!  | 0.42265  | #DIV/0!  | 0.42265  |
| CTD-2194D22.1__ar  | 0        | 0        | 0.195097 | 0        | 0        | 0        | 0        | 0        | 0        | #DIV/0!  | #DIV/0!  | #DIV/0!  | 0.42265  | 0.42265  | #DIV/0!  |
| CTD-2194D22.2__lin | 0        | 0.094394 | 0.556759 | 0        | 0.333351 | 0.445796 | 0        | 0        | 0.171519 | -0.2589  | 1.924628 | 2.183527 | 0.719516 | 0.301837 | 0.187335 |
| CTD-2194D22.4__ar  | 0        | 0.154595 | 0.248092 | 0.049682 | 1.77186  | 12.6556  | 13.1808  | 0        | 0.081469 | -5.16797 | -5.04152 | 0.126449 | 0.350582 | 0.436804 | 0.961602 |
| CTD-2194L12.2__lin | 0        | 0        | 1.21719  | 0.275758 | 1.68374  | 10.0891  | 0.88791  | 0        | 0        | -3.30724 | 0.455069 | 3.762308 | 0.307817 | 0.873818 | 0.371165 |
| CTD-2194L12.3__lin | 0        | 0        | 1.25477  | 0.36364  | 0.388326 | 4.83086  | 0.672633 | 0.075066 | 0        | -2.15357 | 0.746893 | 2.900466 | 0.308853 | 0.794652 | 0.424522 |
| CTD-2196E14.6__se  | 0.182222 | 0.601909 | 1.1286   | 0.528703 | 1.42905  | 61.0596  | 0.28449  | 0.317289 | 1.2238   | -5.04204 | 0.06728  | 5.109323 | 0.411409 | 0.841303 | 0.409673 |



|                     |          |          |          |          |          |         |          |          |          |          |          |          |          |          |          |
|---------------------|----------|----------|----------|----------|----------|---------|----------|----------|----------|----------|----------|----------|----------|----------|----------|
| CTD-2287N17.1__lin  | 0        | 0        | 0.133956 | 0.526832 | 0.352164 | 0       | 0.391127 | 0        | 0.144674 | -2.7141  | -1.99994 | 0.714159 | 0.335883 | 0.407051 | 0.50977  |
| CTD-2288O8.1__ant   | 0.914777 | 0        | 0.894468 | 8.83308  | 9.08211  | 714.898 | 0.383414 | 2.71186  | 0        | -8.66191 | -0.77468 | 7.887235 | 0.408987 | 0.744373 | 0.410746 |
| CTD-2291D10.2__lin  | 0        | 0.062443 | 0.194296 | 0        | 1.7567   | 2.27478 | 0        | 0        | 0.120618 | -3.97293 | 1.089859 | 5.062792 | 0.187744 | 0.18627  | 0.187688 |
| CTD-2292M14.1__lir  | 0        | 0        | 0        | 6.88503  | 3.18715  | 18.8331 | 0.687685 | 0        | 0.277503 | #NUM!    | #NUM!    | 4.904379 | 0.178065 | 0.248547 | 0.186158 |
| CTD-2297D10.2__ar   | 0        | 0        | 0.03321  | 0.110114 | 0.336636 | 58.0879 | 0.195093 | 0.108751 | 0.054159 | -10.7834 | -3.43027 | 7.353176 | 0.418218 | 0.164117 | 0.421233 |
| CTD-2302E22.4__an   | 0.029326 | 0.138367 | 0        | 0.310129 | 0.062329 | 1.42589 | 0.085977 | 0.063918 | 0.095455 | -3.42278 | -0.54902 | 2.87376  | 0.353067 | 0.664546 | 0.335434 |
| CTD-2306M5.1__linc  | 0        | 0        | 0.785865 | 0        | 7.68629  | 4.50738 | 0.692856 | 0        | 0.633974 | -3.95571 | -0.75563 | 3.200077 | 0.228755 | 0.559676 | 0.273421 |
| CTD-2308N23.2__ar   | 0.196982 | 0.21294  | 1.09789  | 3.63209  | 2.67734  | 23.1152 | 1.36389  | 0        | 0.196489 | -4.2865  | -0.04944 | 4.237056 | 0.281083 | 0.979629 | 0.306151 |
| CTD-2311B13.1__lin  | 0        | 0.045384 | 1.4283   | 1.40788  | 0.746461 | 1.98623 | 0.645148 | 0        | 0        | -1.4904  | 1.191725 | 2.682128 | 0.077349 | 0.694907 | 0.104979 |
| CTD-2311B13.7__lin  | 0        | 0.033793 | 0.144294 | 0.018216 | 2.52217  | 4.22964 | 0.224951 | 0.037431 | 0        | -5.24851 | -0.55909 | 4.689423 | 0.204387 | 0.817913 | 0.234763 |
| CTD-2311M21.2__ps   | 0.026245 | 0        | 0.1402   | 0.04657  | 3.57592  | 9.39286 | 0.257615 | 0.038288 | 0.873894 | -6.28903 | -2.81314 | 3.475884 | 0.252159 | 0.247938 | 0.258779 |
| CTD-2313F11.1__pr   | 9.71399  | 0.182751 | 0.433573 | 0.204688 | 1.22798  | 1.34442 | 0.302701 | 3.47691  | 0.470484 | 1.895239 | 1.281317 | -0.61392 | 0.546209 | 0.647945 | 0.647815 |
| CTD-2313F11.2__lin  | 0        | 0        | 0        | 0        | 0        | 0       | 0.060586 | 0        | 0        | #DIV/0!  | #NUM!    | #NUM!    | #DIV/0!  | 0.42265  | 0.42265  |
| CTD-2313F11.3__lin  | 0        | 0        | 0.460043 | 0        | 0        | 1.71856 | 0.959596 | 0        | 0.07099  | -1.90136 | -1.16362 | 0.737735 | 0.42265  | 0.681879 | 0.791675 |
| CTD-2313N18.5__pr   | 2.70689  | 0.794467 | 2.35465  | 6.19764  | 5.75507  | 10.4482 | 2.0866   | 1.54378  | 2.14977  | -1.93557 | 0.01881  | 1.954379 | 0.055572 | 0.955943 | 0.056763 |
| CTD-2314B22.3__lin  | 1.55179  | 4.97372  | 0.712909 | 0        | 6.50416  | 2.92025 | 0.567952 | 2.04904  | 3.63592  | -0.38073 | 0.211146 | 0.591874 | 0.593144 | 0.866134 | 0.597377 |
| CTD-2314G24.2__ar   | 0.130181 | 0.115129 | 0.738742 | 0.144276 | 0.292982 | 4.2581  | 0.279947 | 0.344086 | 0.1773   | -2.25443 | 0.296333 | 2.550761 | 0.391942 | 0.831091 | 0.449422 |
| CTD-2315E11.1__lin  | 37.3844  | 6.77635  | 18.9924  | 22.3386  | 12.3977  | 23.1152 | 11.1894  | 31.4101  | 47.1315  | 0.1265   | -0.50675 | -0.63325 | 0.815411 | 0.663933 | 0.435356 |
| CTD-2316B1.1__linc  | 0        | 0        | 0        | 0        | 0        | 2.61204 | 0        | 0        | 0        | #NUM!    | #DIV/0!  | #DIV/0!  | 0.42265  | #DIV/0!  | 0.42265  |
| CTD-2316B1.2__linc  | 0        | 0        | 0        | 0        | 0        | 12.4368 | 0        | 0        | 0        | #NUM!    | #DIV/0!  | #DIV/0!  | 0.42265  | #DIV/0!  | 0.42265  |
| CTD-2319I12.1__pro  | 1.10445  | 0.179653 | 1.5391   | 0        | 6.43953  | 34.3314 | 1.43169  | 1.58264  | 1.26871  | -3.85214 | -0.6013  | 3.250834 | 0.344091 | 0.424998 | 0.370181 |
| CTD-2319I12.5__linc | 0.127188 | 0.075016 | 0.45105  | 0.041998 | 1333.84  | 8.02574 | 0.248459 | 0.173174 | 0.344797 | -11.0044 | -0.23051 | 10.77384 | 0.419417 | 0.653839 | 0.419424 |
| CTD-2323K18.1__pr   | 6.93368  | 3.48919  | 4.52317  | 14.3339  | 546.349  | 259.637 | 1.52327  | 2.66894  | 3.26103  | -5.77835 | 1.003824 | 6.782175 | 0.224851 | 0.229693 | 0.219422 |
| CTD-2324F15.2__lin  | 0        | 0.086841 | 1.04702  | 0.08158  | 2.82695  | 40.149  | 2.13595  | 0.067103 | 0.053476 | -5.24695 | -0.99286 | 4.254089 | 0.382502 | 0.724861 | 0.414642 |
| CTD-2325B11.1__lin  | 0        | 0        | 0        | 0        | 4.00173  | 4.20055 | 0        | 0        | 0        | #NUM!    | #DIV/0!  | #DIV/0!  | 0.183743 | #DIV/0!  | 0.183743 |
| CTD-2333M24.1__lir  | 0        | 0        | 0        | 0        | 1.47669  | 0.28462 | 0        | 0        | 0        | #NUM!    | #DIV/0!  | #DIV/0!  | 0.323816 | #DIV/0!  | 0.323816 |
| CTD-2335O3.3__linc  | 0        | 0        | 0.034996 | 0        | 0.297131 | 1.90582 | 0        | 0        | 0        | -5.97612 | #DIV/0!  | #DIV/0!  | 0.339235 | 0.42265  | 0.340603 |
| CTD-2336H13.2__lin  | 0        | 0        | 0        | 11.3061  | 170.785  | 86.9931 | 0.48803  | 0        | 0        | #NUM!    | #NUM!    | 9.106872 | 0.190846 | 0.42265  | 0.192195 |
| CTD-2337A12.1__ar   | 9.85592  | 4.11707  | 6.5259   | 9.57817  | 21.4949  | 32.3613 | 2.86356  | 6.40907  | 6.05566  | -1.62972 | 0.419349 | 2.049068 | 0.203888 | 0.595135 | 0.105762 |
| CTD-2337I7.1__lincF | 0        | 0        | 0.161083 | 0.021366 | 0.08595  | 17.0257 | 0.110406 | 0.017584 | 0.070056 | -6.73283 | -0.29803 | 6.434804 | 0.418984 | 0.851977 | 0.423366 |
| CTD-2342J14.6__an   | 0.340867 | 0.260306 | 0.482052 | 0.41483  | 0.412218 | 579.152 | 0.234228 | 0.495498 | 1.06542  | -9.06452 | -0.72877 | 8.335756 | 0.422424 | 0.355725 | 0.422553 |
| CTD-2354A18.1__pr   | 0        | 0        | 0.336749 | 0        | 2.53562  | 2.82083 | 0.228664 | 0        | 0.420584 | -3.99153 | -0.9471  | 3.044436 | 0.183546 | 0.259195 | 0.223286 |
| CTD-2357A8.3__linc  | 0.238237 | 0.110351 | 0.149813 | 0.148946 | 8.66109  | 5.33095 | 0.917571 | 0        | 0.947555 | -4.82643 | -1.90389 | 2.922538 | 0.212216 | 0.251061 | 0.272149 |
| CTD-2366F13.1__an   | 0.91798  | 0.297985 | 0.223105 | 0.148424 | 0.472988 | 2.9722  | 0.247236 | 0.455868 | 0.925379 | -1.3203  | -0.17839 | 1.141906 | 0.565081 | 0.88885  | 0.446357 |
| CTD-2369P2.5__ant   | 17.4864  | 5.33924  | 7.65691  | 5.6499   | 4.56061  | 53.5455 | 2.69006  | 8.46538  | 7.66014  | -1.06458 | 0.696056 | 1.760634 | 0.59469  | 0.55459  | 0.437736 |

|                     |          |          |          |          |          |          |          |          |          |          |          |          |          |          |          |
|---------------------|----------|----------|----------|----------|----------|----------|----------|----------|----------|----------|----------|----------|----------|----------|----------|
| CTD-2373J6.1__sen   | 0        | 0.065613 | 0.221756 | 0        | 0        | 0        | 0        | 0        | 0.059966 | #DIV/0!  | 2.260699 | #NUM!    | 0.282569 | 0.247996 | 0.42265  |
| CTD-2382E5.1__ant   | 0        | 0        | 0.45466  | 0        | 122.616  | 288.191  | 0        | 0        | 0        | -9.81946 | #DIV/0!  | #DIV/0!  | 0.242527 | 0.42265  | 0.242701 |
| CTD-2383M3.1__ant   | 0        | 0        | 1.07911  | 0        | 0        | 1.64105  | 0        | 0        | 3.74027  | -0.60478 | -1.7933  | -1.18852 | 0.42265  | 0.42265  | 0.42265  |
| CTD-2384A14.1__lin  | 0.044168 | 0        | 0.375164 | 0.352141 | 6.32791  | 5.19367  | 0.137251 | 0        | 0        | -4.82353 | 1.611277 | 6.434812 | 0.169155 | 0.578672 | 0.172561 |
| CTD-2384A14.2__lin  | 0        | 0        | 0        | 0        | 0        | 0        | 0        | 0        | 0        | #DIV/0!  | #DIV/0!  | #DIV/0!  | #DIV/0!  | #DIV/0!  | #DIV/0!  |
| CTD-2384B11.2__ar   | 15.1616  | 6.85287  | 4.71816  | 5.425    | 4.76181  | 2.09157  | 0.845102 | 8.06121  | 6.72046  | 1.122482 | 0.774582 | -0.3479  | 0.189724 | 0.557986 | 0.735174 |
| CTD-2503O16.4__lin  | 0        | 0        | 0        | 0.893224 | 33.5984  | 83.3709  | 0.925805 | 0        | 0        | #NUM!    | #NUM!    | 6.992181 | 0.242993 | 0.42265  | 0.248902 |
| CTD-2506J14.1__lin  | 0.816922 | 0        | 1.65526  | 0.213221 | 4.50386  | 27.2194  | 0.261764 | 0.750681 | 0.262269 | -3.69135 | 0.955611 | 4.64696  | 0.344837 | 0.587728 | 0.349581 |
| CTD-2509G16.2__lin  | 0        | 0.025389 | 0.129214 | 0.085588 | 3.85966  | 2.72557  | 0.126437 | 0        | 0.046796 | -5.43122 | -0.16415 | 5.267077 | 0.187692 | 0.92972  | 0.201553 |
| CTD-2509G16.5__lin  | 0.062641 | 0        | 0.552897 | 1.03427  | 663.926  | 66.378   | 1.05819  | 0        | 0.017044 | -10.2145 | -0.80473 | 9.409744 | 0.367664 | 0.765252 | 0.368112 |
| CTD-2514K5.2__ant   | 0.272068 | 0.221221 | 0.719393 | 0.464176 | 0.64643  | 0.762412 | 0.139454 | 0.116593 | 0.280419 | -0.62716 | 1.176643 | 1.803806 | 0.186366 | 0.169956 | 0.018796 |
| CTD-2516F10.2__an   | 1.9723   | 0.787092 | 0.629039 | 0.511244 | 3.39751  | 51.1116  | 0.450436 | 2.32521  | 0.870691 | -4.02128 | -0.10583 | 3.915446 | 0.410539 | 0.931609 | 0.409763 |
| CTD-2521M24.6__ar   | 3.95235  | 0.565064 | 1.4903   | 2.18324  | 0.984598 | 11.4475  | 0.573014 | 3.68551  | 2.83168  | -1.2826  | -0.23901 | 1.043584 | 0.509021 | 0.86956  | 0.5263   |
| CTD-2521M24.9__lir  | 18.6639  | 2.48549  | 39.4687  | 1.54273  | 2.90422  | 14.7409  | 0.616937 | 17.7363  | 7.49574  | 1.659555 | 1.229641 | -0.42991 | 0.204781 | 0.495073 | 0.767386 |
| CTD-2524L6.3__anti  | 0        | 0        | 0        | 1.56678  | 1.76395  | 1.50171  | 1.55112  | 0        | 3.80434  | #NUM!    | #NUM!    | -0.14826 | 0.002387 | 0.247402 | 0.895898 |
| CTD-2525I3.3__antis | 0.738687 | 4.25443  | 1.00228  | 3.0343   | 4.15661  | 200.636  | 1.25876  | 0.946168 | 0.751882 | -5.11538 | 1.019814 | 6.135197 | 0.416332 | 0.477605 | 0.408348 |
| CTD-2526A2.2__linc  | 0.098417 | 0.116095 | 0.426175 | 0.563111 | 0.487412 | 0.653795 | 0.160177 | 0.071453 | 0.14226  | -1.4115  | 0.777006 | 2.18851  | 0.035801 | 0.476007 | 0.005907 |
| CTD-2526M8.3__linc  | 0.017436 | 0        | 0        | 0        | 2.73799  | 3.35383  | 0.034231 | 0        | 0        | -8.44863 | -0.9732  | 7.47543  | 0.189976 | 0.42265  | 0.192234 |
| CTD-2527I21.4__pro  | 6.50368  | 1.88746  | 2.70939  | 0.451019 | 9.53666  | 10.7206  | 1.21648  | 0.594625 | 0.730748 | -0.89958 | 2.126676 | 3.026255 | 0.56054  | 0.146785 | 0.218985 |
| CTD-2530H12.1__ar   | 0        | 0        | 0.226274 | 0        | 16.1248  | 1.46424  | 0.712205 | 0        | 1.76118  | -6.28046 | -3.45034 | 2.830118 | 0.380148 | 0.233274 | 0.459401 |
| CTD-2531D15.4__ar   | 0        | 0        | 0.661855 | 0        | 21.4125  | 24.3389  | 0        | 0        | 0        | -6.11116 | #DIV/0!  | #DIV/0!  | 0.184531 | 0.42265  | 0.185169 |
| CTD-2534I21.9__linc | 0        | 0        | 0        | 0        | 0        | 25.6659  | 0        | 0        | 0        | #NUM!    | #DIV/0!  | #DIV/0!  | 0.42265  | #DIV/0!  | 0.42265  |
| CTD-2536I1.1__lincF | 0.823109 | 0.196399 | 0.150158 | 0.077596 | 2.16462  | 1.57315  | 0.024527 | 0.045566 | 0.009079 | -1.70572 | 3.884963 | 5.590688 | 0.398763 | 0.236719 | 0.181151 |
| CTD-2538C1.2__linc  | 0.249613 | 0.049082 | 0        | 0.054774 | 0.71905  | 461.106  | 1.01932  | 0.3166   | 0.405103 | -10.5946 | -2.54319 | 8.051438 | 0.422055 | 0.084927 | 0.423356 |
| CTD-2540B15.9__lin  | 0.419645 | 0.33825  | 0.86439  | 0.555755 | 4.50668  | 8.70681  | 0.791993 | 0.578995 | 0.414075 | -3.08535 | -0.13795 | 2.947403 | 0.21046  | 0.85129  | 0.246197 |
| CTD-2540L5.5__linc  | 11.4473  | 2.94997  | 7.34234  | 7.27963  | 7.09033  | 2.70548  | 3.43785  | 8.51686  | 5.12507  | 0.348403 | 0.348037 | -0.00037 | 0.640192 | 0.731042 | 0.999473 |
| CTD-2540L5.6__linc  | 2.08903  | 0.528964 | 3.71185  | 0.667371 | 0.330623 | 2.70476  | 0.324427 | 1.39823  | 1.12895  | 0.773571 | 1.150395 | 0.376824 | 0.135004 | 0.381469 | 0.745917 |
| CTD-2540M10.1__lir  | 0        | 0        | 0.904946 | 0        | 2.5201   | 73.0158  | 0.658041 | 0        | 0        | -6.38319 | 0.459654 | 6.842841 | 0.402837 | 0.872598 | 0.408302 |
| CTD-2541J13.1__lin  | 0.101442 | 0        | 0.02771  | 0        | 0.138273 | 2.56722  | 0        | 0.151342 | 0.070362 | -4.38875 | -0.77957 | 3.609185 | 0.415607 | 0.714435 | 0.42568  |
| CTD-2542L18.1__lin  | 0.076158 | 0.089799 | 0.161043 | 0.236516 | 0.453266 | 0.969269 | 0.132907 | 0.120371 | 0.083024 | -2.343   | -0.04047 | 2.302529 | 0.146043 | 0.946931 | 0.198106 |
| CTD-2544M6.1__linc  | 0.041735 | 0.068365 | 1.23303  | 0        | 1333.84  | 1161.52  | 0.08172  | 0        | 0.092408 | -10.8594 | 2.947374 | 13.80681 | 0.185485 | 0.409706 | 0.185472 |
| CTD-2547L24.4__lin  | 0        | 0        | 0        | 0.196004 | 2.41728  | 0.562329 | 0.387292 | 0        | 0.107467 | #NUM!    | #NUM!    | 2.682237 | 0.263546 | 0.289298 | 0.372635 |
| CTD-2554C21.1__ps   | 32.8244  | 11.7817  | 9.94769  | 5.35406  | 3.51392  | 238.001  | 4.19021  | 11.659   | 8.78409  | -2.17799 | 1.14707  | 3.325064 | 0.516933 | 0.397217 | 0.440594 |
| CTD-2555A7.2__linc  | 0        | 0.098291 | 0.097354 | 0        | 0.415833 | 4.74695  | 0.081727 | 0.075924 | 0.060503 | -4.72184 | -0.1571  | 4.564734 | 0.384653 | 0.859359 | 0.392531 |
| CTD-2555C10.3__lin  | 0.552485 | 1.30479  | 0.407896 | 3.25705  | 4.97748  | 61.9657  | 2.04001  | 0.297404 | 0.590987 | -4.95378 | -0.37049 | 4.583291 | 0.364579 | 0.787958 | 0.369131 |

|                     |          |          |          |          |          |          |          |          |          |          |          |          |          |          |          |
|---------------------|----------|----------|----------|----------|----------|----------|----------|----------|----------|----------|----------|----------|----------|----------|----------|
| CTD-2555K7.2__pro   | 20.866   | 9.88901  | 8.28533  | 8.20986  | 8.84169  | 1072.35  | 4.13361  | 9.8463   | 5.94961  | -4.80243 | 0.970059 | 5.772485 | 0.430126 | 0.346917 | 0.420991 |
| CTD-2555O16.2__ar   | 0        | 0        | 0        | 0        | 39.9278  | 4.61532  | 0        | 0        | 0        | #NUM!    | #DIV/0!  | #DIV/0!  | 0.360173 | #DIV/0!  | 0.360173 |
| CTD-2560E9.3__ant   | 0.521882 | 0.314427 | 1.06421  | 0.963901 | 5.10683  | 3.33367  | 0.370011 | 0.139993 | 0.34151  | -2.30694 | 1.158291 | 3.465234 | 0.185797 | 0.201847 | 0.152829 |
| CTD-2561B21.5__an   | 0        | 0        | 0        | 0        | 0        | 1.43658  | 0        | 0        | 0        | #NUM!    | #DIV/0!  | #DIV/0!  | 0.42265  | #DIV/0!  | 0.42265  |
| CTD-2561J22.5__prc  | 0.049316 | 1.74127  | 0.406818 | 0.024633 | 18.9253  | 9.00876  | 0.821037 | 1.43841  | 0        | -3.66942 | -0.04017 | 3.629255 | 0.226026 | 0.96121  | 0.246337 |
| CTD-2562J15.6__an   | 1.21037  | 0.479439 | 2.58882  | 2.7465   | 17.7302  | 59.2993  | 1.00868  | 1.69516  | 2.75689  | -4.22073 | -0.35195 | 3.868789 | 0.264902 | 0.451265 | 0.27028  |
| CTD-2562J17.4__lin  | 0.040969 | 0.024794 | 0.328884 | 3.27279  | 42.5527  | 38.4988  | 0.822794 | 0.044856 | 0.089343 | -7.73924 | -1.27795 | 6.461295 | 0.153392 | 0.603065 | 0.160626 |
| CTD-2571L23.6__an   | 17.5976  | 13.6687  | 9.47738  | 10.8665  | 17.2048  | 11.8464  | 5.10874  | 11.731   | 10.0013  | 0.029548 | 0.602136 | 0.572588 | 0.94012  | 0.365436 | 0.074313 |
| CTD-2571L23.8__lin  | 1.89952  | 2.53952  | 5.96075  | 13.6718  | 100.521  | 217.355  | 3.38313  | 1.59734  | 2.00457  | -4.99459 | 0.574214 | 5.568805 | 0.205234 | 0.544581 | 0.210033 |
| CTD-2572N17.1__lin  | 0        | 0        | 0        | 0        | 48.6409  | 3.83947  | 0        | 0        | 0        | #NUM!    | #DIV/0!  | #DIV/0!  | 0.379008 | #DIV/0!  | 0.379008 |
| CTD-2576F9.1__pse   | 16.7431  | 8.44575  | 1.72505  | 39.7165  | 8.24612  | 25.0439  | 1.14336  | 4.70404  | 5.00296  | -1.43967 | 1.310609 | 2.750282 | 0.187062 | 0.433585 | 0.17717  |
| CTD-2582D11.1__lin  | 0.053117 | 0.041761 | 0.088596 | 0        | 23.9429  | 18.3223  | 0.104077 | 0        | 0        | -7.84775 | 0.817922 | 8.665675 | 0.191812 | 0.584818 | 0.192627 |
| CTD-2586B10.1__lin  | 0        | 0        | 0.96818  | 0        | 6.65553  | 16.7897  | 0.656553 | 0        | 0        | -4.59788 | 0.560364 | 5.158239 | 0.243951 | 0.846198 | 0.271992 |
| CTD-2587H24.10__l   | 0.15661  | 0.877616 | 1.72821  | 0.154769 | 1.8633   | 4.41421  | 0.701854 | 0.042586 | 0.339078 | -1.21939 | 1.350218 | 2.569607 | 0.259464 | 0.433159 | 0.313262 |
| CTD-2587H24.5__ar   | 0.041388 | 0.175737 | 1.45818  | 0.330734 | 15.3279  | 17.743   | 1.62953  | 0.163319 | 0.401441 | -4.31742 | -0.38933 | 3.928093 | 0.176592 | 0.842927 | 0.219119 |
| CTD-2587M23.1__lir  | 0.009716 | 0.057284 | 0.165427 | 0.077559 | 0.228884 | 0.223626 | 0.405491 | 0        | 0.021178 | -1.18941 | -0.87634 | 0.313064 | 0.111849 | 0.736202 | 0.866814 |
| CTD-2589M5.4__ant   | 0        | 0        | 0.426245 | 0.812049 | 1.95302  | 2.00661  | 0.816074 | 0.456636 | 0        | -3.48474 | -1.57815 | 1.906593 | 0.049796 | 0.524468 | 0.192958 |
| CTD-2591A6.2__linc  | 0        | 0        | 9.98932  | 0        | 84.769   | 36.5986  | 0        | 0        | 0        | -3.60285 | #DIV/0!  | #DIV/0!  | 0.276238 | 0.42265  | 0.241093 |
| CTD-2616J11.2__an   | 0        | 0        | 0        | 0        | 0        | 0        | 0        | 0        | 0        | #DIV/0!  | #DIV/0!  | #DIV/0!  | #DIV/0!  | #DIV/0!  | #DIV/0!  |
| CTD-2619J13.14__li  | 0.575439 | 0.375601 | 1.24194  | 1.27572  | 1.98393  | 12.5965  | 1.44143  | 0.510695 | 0.678153 | -2.85408 | -0.26232 | 2.591755 | 0.313408 | 0.757734 | 0.36421  |
| CTD-2619J13.8__prc  | 28.5159  | 0.301629 | 2.06742  | 0.152506 | 2.56094  | 5.92601  | 0.363186 | 0.910657 | 0.268327 | 1.837892 | 4.32387  | 2.485979 | 0.552707 | 0.399609 | 0.305161 |
| CTD-2621I17.6__linc | 0        | 0        | 1.4324   | 0        | 2.99663  | 13.0311  | 1.1242   | 0        | 0        | -3.48406 | 0.349536 | 3.833599 | 0.296583 | 0.902278 | 0.358749 |
| CTD-2623N2.11__lin  | 0.411762 | 0.486311 | 0.817406 | 0        | 1.06367  | 28.6722  | 0.693245 | 0.110595 | 0.329542 | -4.11552 | 0.597977 | 4.713498 | 0.419406 | 0.503626 | 0.41786  |
| CTD-2623N2.5__linc  | 0.106056 | 0.09382  | 0.337172 | 0        | 1.69977  | 8.6773   | 0.419104 | 0.093497 | 0.057571 | -4.27221 | -0.08635 | 4.185859 | 0.331159 | 0.954437 | 0.354986 |
| CTD-2632K10.1__ar   | 0        | 0        | 0        | 0        | 38.9007  | 4.92906  | 0        | 0        | 0.058026 | #NUM!    | #NUM!    | 9.560988 | 0.354654 | 0.42265  | 0.355389 |
| CTD-2643I7.1__sens  | 0        | 0        | 0        | 0        | 0        | 0        | 0        | 0        | 0        | #DIV/0!  | #DIV/0!  | #DIV/0!  | #DIV/0!  | #DIV/0!  | #DIV/0!  |
| CTD-2651B20.3__ar   | 0.048165 | 0.085193 | 0.192911 | 0.224107 | 1.98555  | 1.43013  | 0.423629 | 98.7869  | 0.053849 | -3.47972 | -8.24907 | -4.76935 | 0.158883 | 0.421272 | 0.429727 |
| CTD-2655K5.1__ant   | 0        | 0.142483 | 0.253465 | 0        | 5.96595  | 1.48021  | 0.504068 | 0        | 0.124786 | -4.23311 | -0.66741 | 3.5657   | 0.316039 | 0.750704 | 0.358828 |
| CTD-2659N19.10__e   | 42.2493  | 19.4685  | 33.91    | 23.5502  | 9.32674  | 16.4657  | 13.1256  | 46.0673  | 26.2961  | 0.954595 | 0.161691 | -0.7929  | 0.028627 | 0.85428  | 0.470807 |
| CTD-2666L21.1__lin  | 0.339251 | 1.31374  | 0.394555 | 2.72173  | 4.81407  | 1626.12  | 0.265119 | 0.763649 | 0.747626 | -9.63999 | 0.204944 | 9.844937 | 0.420563 | 0.762025 | 0.420341 |
| CTD-3006G17.2__ps   | 0        | 0        | 0.652468 | 0        | 24.3852  | 73.0158  | 0.574194 | 0        | 0        | -7.22189 | 0.184369 | 7.406255 | 0.268509 | 0.948005 | 0.27382  |
| CTD-3018O17.3__pr   | 0        | 21.3926  | 1.21275  | 0.357129 | 3.82971  | 31.7692  | 0        | 0.092067 | 0.045372 | -0.66957 | 7.361729 | 8.031299 | 0.781308 | 0.391921 | 0.352646 |
| CTD-3032H12.2__lin  | 0.363577 | 0.201049 | 0.303018 | 0        | 3.49589  | 3.29051  | 0.085545 | 0.301995 | 0.110826 | -2.96747 | 0.799898 | 3.767369 | 0.23423  | 0.395591 | 0.194609 |
| CTD-3049M7.1__linc  | 61.3061  | 25.4838  | 44.2483  | 24.9613  | 44.1787  | 989.714  | 12.7449  | 30.8373  | 37.8601  | -3.01444 | 0.686137 | 3.700582 | 0.433956 | 0.418846 | 0.407255 |
| CTD-3060P21.1__ar   | 0        | 0        | 0        | 0        | 0        | 3.33575  | 0        | 0        | 0        | #NUM!    | #DIV/0!  | #DIV/0!  | 0.42265  | #DIV/0!  | 0.42265  |

|                    |          |          |          |          |          |          |          |          |          |          |          |          |          |          |          |
|--------------------|----------|----------|----------|----------|----------|----------|----------|----------|----------|----------|----------|----------|----------|----------|----------|
| CTD-3064H18.4__ar  | 0        | 0        | 0        | 0        | 0        | 0        | 1.22524  | 0        | 0        | #DIV/0!  | #NUM!    | #NUM!    | #DIV/0!  | 0.42265  | 0.42265  |
| CTD-3076O17.2__ar  | 0        | 0.058563 | 0.136749 | 0.099023 | 1.99852  | 2.42902  | 0.073066 | 0.067876 | 0.054092 | -4.53456 | 0.002056 | 4.536616 | 0.167732 | 0.99855  | 0.182949 |
| CTD-3080P12.3__ar  | 0.017311 | 0        | 0.43311  | 0.114865 | 1.92769  | 2.29948  | 0.764787 | 0        | 0        | -3.26903 | -0.76379 | 2.505241 | 0.163172 | 0.789904 | 0.327295 |
| CTD-3092A11.1__ps  | 6.76935  | 1.50016  | 2.36382  | 15.7674  | 12.7368  | 11.0783  | 0.82095  | 3.62673  | 1.95252  | -1.89627 | 0.732405 | 2.628674 | 0.006764 | 0.613931 | 0.029495 |
| CTD-3105H18.13__l  | 0.106112 | 0.017876 | 0.151741 | 0.080527 | 2.10758  | 0        | 0.133733 | 0.215351 | 0.132002 | -2.98836 | -0.80304 | 2.185316 | 0.473069 | 0.408286 | 0.480627 |
| CTD-3105H18.7__ar  | 0        | 0.059776 | 0        | 0        | 32.2424  | 105.531  | 0.692414 | 0.384838 | 0        | -11.1704 | -4.17165 | 6.998798 | 0.279347 | 0.232024 | 0.284073 |
| CTD-3118D7.1__ser  | 0.008696 | 1.02031  | 0.095818 | 0.20833  | 0.232893 | 5.82947  | 0.042682 | 0.20934  | 0        | -2.47893 | 2.158077 | 4.637002 | 0.48696  | 0.383456 | 0.404157 |
| CTD-3126B10.1__ar  | 0        | 0        | 0        | 0        | 0        | 0        | 0        | 0        | 0        | #DIV/0!  | #DIV/0!  | #DIV/0!  | #DIV/0!  | #DIV/0!  | #DIV/0!  |
| CTD-3138B18.5__ar  | 2.92566  | 8.41562  | 17.5865  | 5.47678  | 7.86958  | 75.3518  | 4.27308  | 2.80334  | 1.82452  | -1.61645 | 1.700426 | 3.316875 | 0.403218 | 0.311162 | 0.374982 |
| CTD-3148I10.15__pr | 126.617  | 176.385  | 400.118  | 80.8957  | 63.8049  | 45.6486  | 226.406  | 182.614  | 128.148  | 1.885122 | 0.388398 | -1.49672 | 0.209943 | 0.669345 | 0.024052 |
| CTD-3187F8.11__lin | 0        | 0        | 0.547977 | 0        | 2.20547  | 19.2216  | 1.26915  | 0        | 0.470238 | -5.28918 | -1.66639 | 3.622783 | 0.358917 | 0.459028 | 0.399326 |
| CTD-3187F8.14__an  | 3.87153  | 0.429501 | 0.763692 | 0.231608 | 6.44325  | 5.70031  | 1.4684   | 1.00403  | 0.509438 | -1.28889 | 0.764267 | 2.05316  | 0.508639 | 0.515868 | 0.288263 |
| CTD-3187F8.2__anti | 0        | 0        | 0.196779 | 0        | 3.16124  | 124.719  | 0.665459 | 0        | 0        | -9.344   | -1.75777 | 7.586228 | 0.408183 | 0.610066 | 0.411294 |
| CTD-3193K9.3__ant  | 0.284942 | 0.235625 | 1.10218  | 0.441441 | 3.26644  | 6.47396  | 0.686164 | 0        | 0.97045  | -2.64949 | -0.0298  | 2.619689 | 0.199066 | 0.959566 | 0.231476 |
| CTD-3194G12.2__lin | 0        | 0        | 0.411247 | 1.38262  | 0        | 5.45113  | 0.33046  | 0        | 0.610814 | -4.0546  | -1.19461 | 2.859991 | 0.290477 | 0.207317 | 0.313188 |
| CTD-3214H19.6__ar  | 0        | 0.784983 | 0        | 0        | 5.04384  | 8.92307  | 0        | 0        | 0        | -4.15321 | #DIV/0!  | #DIV/0!  | 0.230268 | 0.42265  | 0.213284 |
| CTD-3222D19.5__se  | 0        | 0.948587 | 0.358545 | 0.207405 | 0.264649 | 10.6561  | 0.077887 | 0.195426 | 0        | -3.08974 | 2.257777 | 5.347515 | 0.450689 | 0.28755  | 0.411938 |
| CTD-3252C9.2__ant  | 0        | 0        | 2.52047  | 3.36592  | 7.77402  | 2.42582  | 1.74314  | 0        | 0        | -2.42821 | 0.532004 | 2.96021  | 0.24728  | 0.853553 | 0.177994 |
| CTD-3253I12.1__ant | 0        | 0        | 0.041415 | 0        | 123.025  | 79.1978  | 1.16582  | 0.045187 | 0        | -12.2535 | -4.86992 | 7.383594 | 0.20207  | 0.42158  | 0.206627 |
| CXADRP3__lincRNA   | 0.014304 | 0.037487 | 0.064749 | 0.044268 | 129.049  | 2.85177  | 0.039582 | 0.019669 | 0.059014 | -10.1449 | -0.02119 | 10.1237  | 0.410181 | 0.968356 | 0.410271 |
| CYP1B1-AS1__antis  | 10.8072  | 2.05744  | 5.02723  | 0.123389 | 7.78497  | 13.181   | 2.04019  | 1.99373  | 0.158124 | -0.23721 | 2.093578 | 2.330789 | 0.873637 | 0.211295 | 0.321619 |
| CYP2G1P__pseudo    | 0        | 0.083571 | 0.496974 | 0.109929 | 2.20338  | 2.00113  | 0.859349 | 0.051666 | 0.064335 | -2.89369 | -0.74851 | 2.145181 | 0.17136  | 0.763213 | 0.355336 |
| CYP4A22-AS1__linc  | 3.43972  | 0.123036 | 10.5347  | 5.74469  | 3.55768  | 18.3927  | 3.65935  | 0.189234 | 3.26681  | -0.97419 | 0.986419 | 1.960614 | 0.115944 | 0.445632 | 0.240112 |
| CYP4F29P__pseudo   | 0        | 0.078625 | 0.167898 | 0.03987  | 0.266238 | 3.39378  | 0.085664 | 0.014041 | 0.125629 | -3.90769 | 0.129652 | 4.037343 | 0.383026 | 0.89391  | 0.388066 |
| CYP4F30P__pseudo   | 0        | 0.317534 | 0.724356 | 0.059237 | 0.560905 | 0.760332 | 0.630747 | 0.004718 | 0.053262 | -0.40596 | 0.597198 | 1.003159 | 0.227488 | 0.79037  | 0.625274 |
| CYP4F35P__lincRN   | 0.056236 | 0.150708 | 0.493227 | 0.310558 | 0.521588 | 3.84076  | 0.175584 | 0.083883 | 0.399261 | -2.73854 | 0.088026 | 2.826566 | 0.320921 | 0.855814 | 0.332463 |
| CYP4F43P__pseudo   | 0.054088 | 0.128893 | 0.243004 | 0.182171 | 0.523939 | 3.59393  | 0.327645 | 0.033258 | 0.078529 | -3.33548 | -0.04484 | 3.290638 | 0.337585 | 0.976701 | 0.372569 |
| CYP4Z2P__pseudog   | 0.028332 | 0        | 1.04677  | 0        | 6.1408   | 637.473  | 0.195488 | 0.712902 | 0.179021 | -9.22558 | -0.01642 | 9.209154 | 0.417132 | 0.993741 | 0.417931 |
| CYP51P1__pseudog   | 13.1841  | 16.8282  | 28.2746  | 62.8773  | 23.3591  | 87.5712  | 12.1681  | 9.68834  | 192.418  | -1.57625 | -1.87822 | -0.30197 | 0.140973 | 0.451866 | 0.800763 |
| CYP51P2__pseudog   | 7.0244   | 8.05636  | 11.0364  | 3.39012  | 2.91524  | 5.6056   | 8.18061  | 7.87512  | 11.4724  | 1.132708 | -0.07591 | -1.20862 | 0.013549 | 0.34773  | 0.004095 |
| DACT3-AS1__antise  | 0.602077 | 0.477377 | 1.59873  | 0.206944 | 7.62861  | 6.55799  | 0.235481 | 0.20438  | 0.207713 | -2.42609 | 2.048138 | 4.474233 | 0.223572 | 0.199302 | 0.187664 |
| DANCR__processed   | 14.5537  | 8.96608  | 12.1263  | 10.1416  | 3.49572  | 6.14157  | 15.87    | 23.661   | 26.3555  | 0.849782 | -0.88624 | -1.73602 | 0.007574 | 0.148218 | 0.085887 |
| DAOA-AS1__antisen  | 0        | 0        | 0.176418 | 0        | 2.16763  | 12.0404  | 1.44841  | 0.026142 | 0.039063 | -6.33156 | -3.10093 | 3.230637 | 0.328283 | 0.469447 | 0.403003 |
| DBIL5P2__pseudoge  | 0        | 0        | 0.198555 | 0.191454 | 0.134762 | 0.155092 | 0.247377 | 0        | 0.098103 | -1.27742 | -0.79906 | 0.47836  | 0.314452 | 0.682289 | 0.499357 |
| DBIL5P__pseudoger  | 0.132288 | 0.025998 | 0.099356 | 0.073301 | 5.19059  | 0.137354 | 1.14903  | 0        | 0.132119 | -4.38985 | -2.314   | 2.075854 | 0.425049 | 0.419299 | 0.551257 |

|                    |          |          |          |          |          |          |          |          |          |          |          |          |          |          |          |
|--------------------|----------|----------|----------|----------|----------|----------|----------|----------|----------|----------|----------|----------|----------|----------|----------|
| DCLRE1CP1__pseu    | 8.2997   | 0.449088 | 0.836456 | 0.172804 | 5.33498  | 810.632  | 0.549976 | 0.606162 | 0.301954 | -6.41186 | 2.716733 | 9.128591 | 0.425    | 0.39609  | 0.419559 |
| DCTN1-AS1__antise  | 0        | 0        | 0        | 0        | 0        | 3.07555  | 0        | 0        | 0        | #NUM!    | #DIV/0!  | #DIV/0!  | 0.42265  | #DIV/0!  | 0.42265  |
| DDX11-AS1__antise  | 2.5894   | 4.10178  | 2.5107   | 5.97802  | 17.166   | 3.88985  | 1.62028  | 3.52982  | 3.60335  | -1.55477 | 0.072077 | 1.626844 | 0.241141 | 0.834938 | 0.262894 |
| DDX11L10__pseudo   | 0.453384 | 0        | 0.394196 | 0.497513 | 0.952386 | 0.761608 | 0.59612  | 0.094519 | 0.429122 | -1.38361 | -0.40177 | 0.98184  | 0.229301 | 0.100599 | 0.318804 |
| DDX12P__pseudoge   | 0.87093  | 0.657261 | 1.09936  | 1.44481  | 2.77234  | 1.73427  | 0.970345 | 1.20943  | 1.24913  | -1.17952 | -0.38403 | 0.795486 | 0.158933 | 0.20326  | 0.145254 |
| DEFB122__pseudog   | 0        | 0        | 0        | 0        | 0        | 0        | 0        | 0        | 0        | #DIV/0!  | #DIV/0!  | #DIV/0!  | #DIV/0!  | #DIV/0!  | #DIV/0!  |
| DGCR11__sense_in   | 0        | 0        | 0        | 0        | 25.5815  | 0        | 0        | 0        | 0        | #NUM!    | #DIV/0!  | #DIV/0!  | 0.42265  | #DIV/0!  | 0.42265  |
| DGCR5__antisense   | 0.103829 | 0.150867 | 0.521153 | 0.848071 | 1.46544  | 9.82007  | 0.721191 | 0.115751 | 0.0692   | -3.96709 | -0.22396 | 3.743125 | 0.303947 | 0.901785 | 0.341555 |
| DGKZP1__pseudoge   | 5.38149  | 3.26151  | 5.01917  | 4.52429  | 4.0649   | 4.93802  | 2.55843  | 5.6163   | 5.1407   | 0.014322 | 0.037088 | 0.022765 | 0.933834 | 0.945574 | 0.951334 |
| DGUOK-AS1__antis   | 12.4249  | 6.87577  | 6.87786  | 5.13473  | 5.34266  | 24.054   | 9.25249  | 8.72521  | 11.3017  | -0.39952 | -0.1615  | 0.238022 | 0.742415 | 0.68861  | 0.780606 |
| DHRS4-AS1__proce   | 8.2871   | 3.50459  | 3.90019  | 82.4427  | 4.94674  | 1349.61  | 4.89508  | 1.04232  | 3.86723  | -6.5169  | 0.678483 | 7.195381 | 0.39114  | 0.189095 | 0.388722 |
| DIAPH3-AS1__antis  | 0        | 0        | 0        | 0        | 2.69127  | 11.182   | 0        | 0        | 0        | #NUM!    | #DIV/0!  | #DIV/0!  | 0.30358  | #DIV/0!  | 0.30358  |
| DICER1-AS1__antis  | 0        | 3.7649   | 0        | 1.16977  | 4.65352  | 2.24774  | 2.85551  | 1.85304  | 2.40234  | -1.10014 | -0.91742 | 0.182723 | 0.074133 | 0.539266 | 0.8306   |
| DIO2-AS1__antisens | 1.85178  | 0.817464 | 1.4232   | 4.64182  | 53.505   | 39.0984  | 1.04456  | 2.56226  | 2.73064  | -4.57059 | -0.63094 | 3.939651 | 0.170443 | 0.442496 | 0.162848 |
| DIO3OS__lincRNA    | 0.291454 | 1.29379  | 1.2271   | 1.25458  | 1.30423  | 3.80382  | 0.201949 | 0.945524 | 0.253437 | -1.17785 | 1.005409 | 2.183259 | 0.254865 | 0.214895 | 0.230031 |
| DISC1FP1__process  | 0        | 0        | 6.09301  | 115.868  | 60.4742  | 337.008  | 2.15105  | 0        | 3.91505  | -6.39664 | 0.006386 | 6.40303  | 0.176862 | 0.994925 | 0.179898 |
| DLEU2__processed_  | 20.2507  | 35.0425  | 19.3816  | 33.6063  | 36.6059  | 461.106  | 27.9546  | 54.709   | 18.9215  | -2.83088 | -0.444   | 2.386887 | 0.403426 | 0.264592 | 0.439423 |
| DLG1-AS1__antisen  | 0        | 0        | 0.922056 | 0        | 0        | 1.03897  | 0        | 0        | 0        | -0.17223 | #DIV/0!  | #DIV/0!  | 0.42265  | 0.42265  | 0.42265  |
| DLGAP1-AS3__antis  | 0        | 0.059121 | 0.275703 | 0.099529 | 2.71665  | 17.0123  | 0.171605 | 0        | 0.054438 | -5.88803 | 0.566807 | 6.454836 | 0.335873 | 0.780545 | 0.34102  |
| DLGAP1-AS5__antis  | 0.011468 | 0        | 4.57586  | 0.045744 | 1.13219  | 3.90629  | 0.035641 | 0.308285 | 0        | -0.14837 | 3.737483 | 3.885856 | 0.781972 | 0.465815 | 0.314468 |
| DNAJB3__pseudoge   | 0        | 0        | 0.074657 | 0        | 20.6467  | 0.13035  | 0        | 0        | 0.081078 | -8.1205  | -0.11903 | 8.001472 | 0.421094 | 0.42265  | 0.421274 |
| DNAJB8-AS1__antis  | 0        | 0.053089 | 0.347885 | 0.179254 | 3.33268  | 6.02354  | 0.32208  | 0.129092 | 0.20148  | -4.57172 | -0.70281 | 3.868919 | 0.195761 | 0.598451 | 0.228424 |
| DNAJC27-AS1__ant   | 0.996494 | 0.793159 | 1.01573  | 5.28028  | 33.9655  | 13.6536  | 1.67459  | 0.985636 | 0.506914 | -4.23698 | -0.17498 | 4.061998 | 0.191128 | 0.759749 | 0.195406 |
| DNAJC3-AS1__lincR  | 1.56077  | 2.38569  | 1.61172  | 7.34528  | 18.9253  | 3.49764  | 6.74372  | 1.42841  | 1.35119  | -2.42109 | -0.77685 | 1.644236 | 0.206858 | 0.566183 | 0.337329 |
| DNAJC9-AS1__antis  | 25.2547  | 9.67973  | 11.4657  | 6.23756  | 38.6024  | 317.673  | 12.6728  | 14.4106  | 29.7013  | -2.96583 | -0.29137 | 2.674458 | 0.407745 | 0.735348 | 0.389353 |
| DNM1P34__pseudog   | 0.03975  | 0        | 0        | 0        | 0        | 13.4787  | 0.269024 | 0        | 0        | -8.40553 | -2.75872 | 5.646803 | 0.424355 | 0.42265  | 0.434286 |
| DNM1P35__antisens  | 0        | 0        | 0        | 0        | 0        | 7.14845  | 0        | 0        | 0        | #NUM!    | #DIV/0!  | #DIV/0!  | 0.42265  | #DIV/0!  | 0.42265  |
| DNM1P46__pseudog   | 0.114326 | 0.235324 | 0.129822 | 0.038028 | 3.88987  | 20.938   | 0.070644 | 0.114801 | 0.083069 | -5.69658 | 0.836448 | 6.533026 | 0.333571 | 0.107418 | 0.329933 |
| DNM1P47__pseudog   | 8.32749  | 0        | 2.60111  | 4.06917  | 55.6807  | 4.08164  | 3.59749  | 20.3562  | 2.90188  | -2.54616 | -1.29711 | 1.249047 | 0.453242 | 0.560041 | 0.396049 |
| DNMBP-AS1__antis   | 0        | 0        | 3.62308  | 10.8262  | 3.67733  | 10.1155  | 1.78748  | 0        | 0        | -2.76449 | 1.01929  | 3.783775 | 0.078063 | 0.737679 | 0.062131 |
| DOC2GP__pseudog    | 0        | 0.127647 | 0.576504 | 0        | 0.522585 | 0.444326 | 0.854148 | 0        | 0.27351  | -0.4575  | -0.67937 | -0.22187 | 0.635737 | 0.732845 | 0.908636 |
| DOCK9-AS2__antise  | 0.126312 | 0.198699 | 0.336295 | 0.277127 | 0.440143 | 6.14837  | 0.246203 | 0.091539 | 0.227746 | -3.376   | 0.225821 | 3.601825 | 0.384422 | 0.714858 | 0.386711 |
| DPH3P1__pseudoge   | 0        | 0        | 0.090603 | 0.159715 | 2.37507  | 4.00937  | 0.324739 | 0        | 0        | -6.1745  | -1.84165 | 4.332854 | 0.187378 | 0.599046 | 0.229936 |
| DPH6-AS1__lincRN   | 17.0692  | 38.6515  | 19.5434  | 3.32012  | 60.0652  | 1161.52  | 2.90566  | 2.28007  | 2.74739  | -4.02456 | 3.246002 | 7.270566 | 0.418919 | 0.085162 | 0.394405 |
| DSCAM-AS1__antis   | 0.027752 | 0        | 0.360707 | 0.073409 | 0.501669 | 0.23758  | 0.189913 | 0.090759 | 0.210851 | -1.06489 | -0.3395  | 0.725389 | 0.527719 | 0.750744 | 0.566746 |

|                    |          |          |          |          |          |          |          |          |          |          |          |          |          |          |          |
|--------------------|----------|----------|----------|----------|----------|----------|----------|----------|----------|----------|----------|----------|----------|----------|----------|
| DSCR10__lincRNA    | 0        | 0        | 2.64818  | 0        | 0        | 2.25959  | 0.190642 | 0        | 0        | 0.22894  | 3.796063 | 3.567123 | 0.42265  | 0.465596 | 0.473232 |
| DSCR4-IT1__sense_  | 0        | 0        | 0        | 0        | 1.95103  | 2.92236  | 0        | 0        | 0        | #NUM!    | #DIV/0!  | #DIV/0!  | 0.199254 | #DIV/0!  | 0.199254 |
| DYX1C1-CCPG1__p    | 28.8461  | 22.5262  | 23.8816  | 6.61166  | 6.72773  | 273.55   | 6.0375   | 30.2324  | 9.89353  | -1.93066 | 0.705016 | 2.635672 | 0.513494 | 0.396802 | 0.474946 |
| EAF1-AS1__antisen: | 8.62372  | 6.79512  | 4.88177  | 3.23208  | 2.32761  | 3.32077  | 3.23552  | 7.0123   | 8.06646  | 1.192817 | 0.148554 | -1.04426 | 0.080917 | 0.816884 | 0.183223 |
| ECEL1P2__pseudog   | 0        | 0        | 0.169822 | 0.22483  | 3.81431  | 4.01941  | 0.118656 | 0.052922 | 0.052698 | -5.56842 | -0.40125 | 5.167176 | 0.160282 | 0.820271 | 0.172734 |
| EEF1A1P12__pseud   | 21.1426  | 0        | 0        | 0        | 0        | 0        | 0        | 16.6807  | 0        | #DIV/0!  | 0.341973 | #NUM!    | 0.42265  | 0.904344 | 0.42265  |
| EEF1A1P25__pseud   | 15.5167  | 10.2031  | 5.64397  | 13.8039  | 26.4121  | 2.509    | 16.9999  | 21.2317  | 17.9853  | -0.44598 | -0.8419  | -0.39592 | 0.604807 | 0.13651  | 0.531605 |
| EEF1A1P9__pseudo   | 2.8017   | 6.97246  | 3.73662  | 0        | 0        | 2.3163   | 6.08106  | 5.95592  | 5.28338  | 2.544217 | -0.35836 | -2.90257 | 0.154853 | 0.415912 | 0.039006 |
| EFCAB14-AS1__ant   | 0        | 0        | 0.270311 | 0.662414 | 0.245645 | 8.51284  | 0.452516 | 0        | 0        | -5.12317 | -0.74335 | 4.379824 | 0.361386 | 0.800426 | 0.392192 |
| EFCAB6-AS1__antis  | 0        | 0        | 0        | 0        | 3.97084  | 398.421  | 0.201956 | 0        | 0        | #NUM!    | #NUM!    | 10.96034 | 0.416925 | 0.42265  | 0.417217 |
| EFTUD1P1__pseudc   | 0.75961  | 0.469444 | 3.43859  | 0.495605 | 10.781   | 40.2585  | 0.262376 | 0.58373  | 0.429552 | -3.46479 | 1.871453 | 5.336242 | 0.292345 | 0.358331 | 0.294228 |
| EGFEM1P__pseudo    | 0.067962 | 0.207124 | 1.52923  | 0.184646 | 167.441  | 403.468  | 116.199  | 0.076121 | 0.057637 | -8.30613 | -6.01066 | 2.29547  | 0.245007 | 0.430663 | 0.41899  |
| EGFLAM-AS2__anti:  | 0        | 0        | 0.161413 | 0        | 9.29166  | 0.239719 | 0.932767 | 0        | 0.097476 | -5.88386 | -2.67416 | 3.209701 | 0.417805 | 0.463484 | 0.474473 |
| EGFLAM-AS4__anti:  | 0        | 0.045894 | 0.155751 | 0.283842 | 1.84752  | 11.8464  | 0.342993 | 0        | 0.063475 | -6.11517 | -1.01132 | 5.103847 | 0.327789 | 0.66981  | 0.343056 |
| EGLN3-AS1__antise  | 0.268733 | 1.04969  | 0.358319 | 0.789277 | 1.95043  | 6.85911  | 0.262591 | 0.065073 | 0.032393 | -2.5172  | 2.219366 | 4.736562 | 0.305262 | 0.26706  | 0.248926 |
| EGOT__lincRNA      | 0.29613  | 0.324304 | 1.01574  | 3.6232   | 0.338237 | 6.09682  | 1.34598  | 0.32323  | 0.482841 | -2.61998 | -0.39539 | 2.224596 | 0.199387 | 0.747025 | 0.246543 |
| EHHADH-AS1__anti   | 0        | 0.86522  | 0.466089 | 0        | 8.25355  | 16.7206  | 0.630913 | 0        | 0        | -4.22952 | 1.077332 | 5.306851 | 0.235492 | 0.653748 | 0.246701 |
| EIF2B5-AS1__antise | 0        | 0.077143 | 0.195327 | 0        | 28.1638  | 11.2142  | 0.285221 | 0.07073  | 0.211007 | -7.17515 | -1.05714 | 6.118005 | 0.251674 | 0.404941 | 0.257348 |
| EIF2B5-IT1__sense_ | 0        | 0        | 0.790876 | 0        | 0.555702 | 0.631836 | 0.233021 | 0        | 0.155186 | -0.58645 | 1.026625 | 1.613076 | 0.603792 | 0.656628 | 0.399338 |
| EIF2S2P4__pseudog  | 33.2653  | 62.5028  | 67.2852  | 36.2388  | 29.2216  | 24.0415  | 38.5174  | 43.007   | 47.3788  | 0.865353 | 0.339056 | -0.5263  | 0.22295  | 0.304622 | 0.163674 |
| EIF3FP3__pseudoge  | 65.9992  | 19.9695  | 16.2339  | 31.5363  | 18.28    | 14.544   | 19.922   | 31.7195  | 41.2832  | 0.667189 | 0.137298 | -0.52989 | 0.367554 | 0.900335 | 0.486263 |
| EIF3J-AS1__lincRN/ | 1.32633  | 1.77425  | 5.5391   | 1.88486  | 87.5953  | 10.3054  | 0.909744 | 1.58962  | 1.24586  | -3.52978 | 1.205926 | 4.735707 | 0.387784 | 0.345475 | 0.358876 |
| EIF4A1P7__pseudog  | 321.255  | 0        | 1.78555  | 0        | 9.7795   | 0        | 0        | 0        | 0        | 5.045811 | #DIV/0!  | #DIV/0!  | 0.437286 | 0.41945  | 0.42265  |
| EMBP1__pseudoger   | 1.1103   | 0.052366 | 0.242998 | 0.309364 | 0.125094 | 16.7206  | 0.466712 | 0.732922 | 0.096869 | -3.60931 | 0.116626 | 3.725937 | 0.448821 | 0.933519 | 0.449617 |
| EMCN-IT1__sense_i  | 0        | 0.293271 | 0        | 0        | 0.775887 | 0        | 0        | 0        | 0        | -1.40361 | #DIV/0!  | #DIV/0!  | 0.42265  | 0.42265  | 0.42265  |
| EMCN-IT2__sense_i  | 0        | 0        | 0        | 0        | 0        | 0        | 0        | 0        | 0.071826 | #DIV/0!  | #NUM!    | #NUM!    | #DIV/0!  | 0.42265  | 0.42265  |
| EMCN-IT3__sense_i  | 0        | 0        | 0        | 0        | 0        | 0        | 0        | 0        | 0        | #DIV/0!  | #DIV/0!  | #DIV/0!  | #DIV/0!  | #DIV/0!  | #DIV/0!  |
| EMX2OS__antisense  | 0.16317  | 0.115443 | 1.40988  | 0.173602 | 456.324  | 12.5867  | 0.92686  | 0.047589 | 0.081119 | -8.11797 | 0.677716 | 8.795683 | 0.408669 | 0.761801 | 0.408002 |
| ENO1-AS1__antisen  | 0        | 0        | 0        | 0        | 0        | 0        | 0        | 0        | 0        | #DIV/0!  | #DIV/0!  | #DIV/0!  | #DIV/0!  | #DIV/0!  | #DIV/0!  |
| ENPP7P4__pseudog   | 0.767174 | 23.8211  | 1.23634  | 4.10547  | 12.4507  | 38.7252  | 2.5206   | 1.94846  | 0.699108 | -1.09805 | 2.321022 | 3.419068 | 0.567445 | 0.456659 | 0.26718  |
| ENPP7P8__pseudog   | 1.73827  | 28.3924  | 1.22727  | 3.92531  | 26.5103  | 14.2177  | 1.66995  | 1.16468  | 6.09236  | -0.50994 | 1.812585 | 2.322521 | 0.423155 | 0.53178  | 0.227803 |
| ENTPD1-AS1__antis  | 7.04498  | 11.5584  | 17.9833  | 183.934  | 110.637  | 200.636  | 7.49624  | 389.143  | 4.45057  | -3.75864 | -3.45453 | 0.304106 | 0.029698 | 0.44301  | 0.858363 |
| ENTPD3-AS1__antis  | 6.09163  | 1.6467   | 4.29138  | 7.46937  | 68.0973  | 32.271   | 2.39174  | 0.726379 | 9.22718  | -3.16419 | -0.03736 | 3.126828 | 0.232955 | 0.970786 | 0.22766  |
| EPN2-AS1__antisen  | 0        | 0        | 0        | 4.87809  | 15.6804  | 0.076202 | 1.0626   | 0        | 0        | #NUM!    | #NUM!    | 4.279401 | 0.274536 | 0.42265  | 0.299797 |
| ERVH48-1__lincRNA  | 0.139296 | 0.07665  | 0.84094  | 0.172993 | 29.1231  | 31.7692  | 0.847888 | 0        | 0.030365 | -5.85246 | 0.26711  | 6.119572 | 0.183447 | 0.904449 | 0.193401 |



|                    |          |          |          |          |          |          |          |          |          |          |          |          |          |          |          |
|--------------------|----------|----------|----------|----------|----------|----------|----------|----------|----------|----------|----------|----------|----------|----------|----------|
| ERVK3-1__processe  | 11.6573  | 289.502  | 7.11619  | 411.794  | 41.8363  | 43.9697  | 6.09634  | 81.005   | 106.503  | -0.69077 | 0.671109 | 1.361875 | 0.76843  | 0.713447 | 0.574365 |
| ESPNP__pseudoger   | 23.7205  | 14.1622  | 1.69978  | 16.9526  | 13.3016  | 7.08833  | 1.46128  | 3.56202  | 3.33398  | 0.084042 | 2.243757 | 2.159714 | 0.851246 | 0.270376 | 0.104132 |
| ESRG__sense_intro  | 0        | 0        | 0.142588 | 0.182084 | 1.78198  | 0.994742 | 0.806767 | 0.056158 | 0.053688 | -4.37509 | -2.68446 | 1.690631 | 0.180317 | 0.450727 | 0.428359 |
| EXOC5P1__pseudoq   | 102.76   | 15.8819  | 15.9308  | 5.69948  | 9.30466  | 7.30875  | 6.30291  | 12.375   | 11.0562  | 2.592436 | 2.178195 | -0.41424 | 0.336368 | 0.373694 | 0.12237  |
| F11-AS1__antisense | 7.88168  | 2.24531  | 0.928745 | 4.57552  | 14.2549  | 113.091  | 0.901037 | 0.142983 | 0.115567 | -3.57681 | 3.253112 | 6.829924 | 0.381651 | 0.221117 | 0.337252 |
| FAHD2CP__pseudoq   | 0.818579 | 1.37999  | 1.92168  | 2.01911  | 0.858843 | 12.8976  | 1.08325  | 2.17997  | 4.01316  | -1.93689 | -0.82049 | 1.116398 | 0.391226 | 0.191875 | 0.456634 |
| FAM138B__lincRNA   | 0        | 0.124346 | 0.525703 | 0        | 1.51337  | 1.08492  | 0.594002 | 0        | 0.338332 | -1.99894 | -0.5203  | 1.478644 | 0.248804 | 0.743401 | 0.462359 |
| FAM138D__lincRNA   | 0        | 0.107386 | 3.41924  | 0.534508 | 2.31883  | 2.12033  | 1.38198  | 0        | 1.51098  | -0.49602 | 0.285742 | 0.781764 | 0.681102 | 0.844886 | 0.527593 |
| FAM13A-AS1__antis  | 2.82768  | 1.93505  | 1.93628  | 3.68312  | 7.68692  | 67.1655  | 1.12463  | 1.61241  | 2.23933  | -3.55133 | 0.428854 | 3.98018  | 0.366679 | 0.434788 | 0.349226 |
| FAM155A-IT1__sens  | 1.79586  | 2.37228  | 1.07118  | 13.0308  | 4.08456  | 32.3216  | 1.94833  | 0.921613 | 2.05591  | -3.23814 | 0.089006 | 3.327145 | 0.232619 | 0.897167 | 0.206488 |
| FAM157A__lincRNA   | 0.412432 | 0.633378 | 0.934671 | 0.602948 | 6.11307  | 1.67302  | 1.0078   | 0.281926 | 0.496848 | -2.08265 | 0.148655 | 2.23131  | 0.331227 | 0.863195 | 0.360665 |
| FAM157C__processi  | 0.001431 | 0.739914 | 4.92184  | 1.45373  | 24.3324  | 23.695   | 3.3634   | 0.019018 | 2.5826   | -3.12719 | -0.07491 | 3.05228  | 0.161897 | 0.958096 | 0.221132 |
| FAM170B-AS1__ant   | 0        | 0        | 0.331673 | 0.040004 | 5.61752  | 10.3947  | 0.295267 | 0.082293 | 0.108886 | -5.59687 | -0.55252 | 5.044351 | 0.212463 | 0.764184 | 0.230797 |
| FAM172BP__pseudc   | 0.129815 | 0.015308 | 0.077984 | 0.086262 | 56.1082  | 0.124308 | 0        | 0.07096  | 0        | -7.97974 | 1.652648 | 9.632386 | 0.422622 | 0.455549 | 0.420482 |
| FAM181A-AS1__pro   | 0        | 0        | 0.274267 | 0.139759 | 9.69533  | 3.58077  | 0.185232 | 0.121323 | 0.06877  | -5.61221 | -0.45256 | 5.159655 | 0.259386 | 0.80686  | 0.261717 |
| FAM182A__processi  | 0.062981 | 0.172535 | 0.209403 | 0.05453  | 0.993297 | 0.283828 | 0.534386 | 0.097171 | 0.053675 | -1.58161 | -0.62305 | 0.958557 | 0.378822 | 0.723698 | 0.641914 |
| FAM21FP__pseudoq   | 3.6547   | 3.72736  | 4.09444  | 0        | 7.79498  | 2.78623  | 1.87953  | 4.05536  | 4.08117  | 0.117178 | 0.196368 | 0.07919  | 0.908068 | 0.53293  | 0.925524 |
| FAM222A-AS1__ant   | 0.770139 | 0.162778 | 0.852288 | 1.27249  | 600.983  | 142.556  | 2.35134  | 0        | 1.47589  | -8.70464 | -1.10021 | 7.604431 | 0.305065 | 0.30954  | 0.306994 |
| FAM230B__processi  | 0.013308 | 0.040535 | 0.552709 | 0.040049 | 10.9162  | 9.1114   | 0.061388 | 0.001782 | 0.019621 | -5.0481  | 2.873094 | 7.921192 | 0.188131 | 0.43652  | 0.187739 |
| FAM27L__lincRNA    | 0        | 0        | 0.239801 | 0        | 0        | 2.98011  | 0.408773 | 0.130317 | 0        | -3.63546 | -1.16869 | 2.466768 | 0.42265  | 0.648442 | 0.531916 |
| FAM35BP__pseudoq   | 1.4451   | 0.500706 | 0.659123 | 0.757268 | 1.12833  | 31.2702  | 0.754129 | 0.812375 | 1.18093  | -3.66995 | -0.07684 | 3.593104 | 0.424052 | 0.910595 | 0.416559 |
| FAM41C__lincRNA    | 0.081094 | 0.201773 | 1.12738  | 0.226153 | 0.062235 | 13.8196  | 0.260318 | 0.082174 | 1.13991  | -3.32249 | -0.07199 | 3.250504 | 0.422471 | 0.806983 | 0.425116 |
| FAM58BP__pseudoq   | 0.033078 | 0        | 0.066107 | 0.218357 | 7.45875  | 0.408036 | 0.096898 | 0        | 0        | -6.34901 | 0.033658 | 6.382669 | 0.382679 | 0.985629 | 0.382669 |
| FAM60BP__pseudoq   | 115.499  | 14.0256  | 5.11847  | 44.4476  | 2.78832  | 5.65768  | 5.75741  | 12.1143  | 91.2206  | 1.347975 | 0.303591 | -1.04438 | 0.343893 | 0.894253 | 0.656164 |
| FAM60CP__pseudoq   | 17.344   | 18.7611  | 11.9515  | 5.73819  | 7.24528  | 4.39038  | 8.99127  | 24.2712  | 15.845   | 1.467817 | -0.03121 | -1.49903 | 0.016578 | 0.943494 | 0.118177 |
| FAM66C__antisense  | 1.01027  | 0.477927 | 0.250033 | 1.65093  | 2.43219  | 28.6016  | 0.26419  | 0.09239  | 0.055223 | -4.23293 | 2.077593 | 6.310518 | 0.371458 | 0.111694 | 0.350223 |
| FAM86C2P__pseudc   | 1.25972  | 0.302336 | 0.872567 | 0.563711 | 1.78403  | 8.91889  | 0.434171 | 0.627122 | 1.28411  | -2.21029 | 0.053863 | 2.264148 | 0.378996 | 0.947327 | 0.333075 |
| FAM86DP__pseudoq   | 1.72424  | 1.78801  | 2.1298   | 1.80824  | 3.54623  | 4.68428  | 1.32877  | 1.73564  | 2.88952  | -0.83129 | -0.07762 | 0.753665 | 0.181735 | 0.790157 | 0.090867 |
| FAM86FP__pseudoq   | 0        | 0        | 0.765582 | 2.88155  | 2.03439  | 167.196  | 0        | 1.8237   | 1.52909  | -7.81257 | -2.13073 | 5.681841 | 0.40573  | 0.244477 | 0.411963 |
| FAM86JP__pseudog   | 0.802207 | 3.65998  | 0.812864 | 0.445664 | 4.17858  | 4.7739   | 1.30505  | 0.271362 | 1.53417  | -0.83319 | 0.762001 | 1.595191 | 0.406473 | 0.643041 | 0.294832 |
| FAM86MP__pseudoi   | 0        | 0        | 0.908    | 1.32936  | 7.10723  | 5.19058  | 0        | 0        | 2.14644  | -3.90765 | -1.24118 | 2.666468 | 0.126158 | 0.42265  | 0.155098 |
| FAM87B__lincRNA    | 4.92484  | 0.018293 | 0.131984 | 3.73567  | 1.39422  | 0        | 0.007602 | 0.870926 | 1.32824  | -0.01549 | 1.201506 | 1.216993 | 0.982657 | 0.677309 | 0.577245 |
| FAM90A27P__pseuc   | 0        | 0        | 0.308331 | 0.029927 | 1.08305  | 0.183064 | 0.696386 | 0.086274 | 0.03682  | -2.07156 | -1.41023 | 0.661331 | 0.477157 | 0.607776 | 0.772222 |
| FAM92A1P1__pseuc   | 12.1735  | 2.71597  | 3.72876  | 4.76358  | 2.47608  | 2.60098  | 2.32213  | 10.2119  | 2.67651  | 0.919892 | 0.291645 | -0.62825 | 0.324219 | 0.841638 | 0.617825 |
| FAM99B__antisense  | 0.529901 | 0        | 0.136199 | 0.100037 | 1.66132  | 12.7092  | 0.450744 | 0.131969 | 0.180654 | -4.44124 | -0.19664 | 4.2446   | 0.371924 | 0.649414 | 0.373231 |

|                       |          |          |          |          |          |          |          |          |          |          |          |          |          |          |          |
|-----------------------|----------|----------|----------|----------|----------|----------|----------|----------|----------|----------|----------|----------|----------|----------|----------|
| FAUP1__pseudogen      | 10.4587  | 151.161  | 18.1591  | 67.5603  | 94.5612  | 95.7651  | 8.52693  | 5.47963  | 129.455  | -0.52051 | 0.325559 | 0.846073 | 0.59644  | 0.885635 | 0.410418 |
| FBXL19-AS1__antisense | 4.29205  | 2.51863  | 6.67136  | 5.26567  | 18.4446  | 5.81359  | 0.761007 | 0.321121 | 2.37963  | -1.13084 | 1.961462 | 3.092305 | 0.420371 | 0.031976 | 0.207555 |
| FCGR1C__pseudogen     | 2.19516  | 0.400573 | 0.753783 | 0.274033 | 0.432432 | 1.00236  | 0.692125 | 0.502584 | 0.407162 | 0.970948 | 1.064195 | 0.093247 | 0.511071 | 0.347284 | 0.915497 |
| FDPSP1__pseudogen     | 485.187  | 41.4138  | 29.3564  | 253.509  | 12.141   | 31.2892  | 30.1472  | 32.3541  | 43.7988  | 0.904806 | 2.386831 | 1.482025 | 0.359631 | 0.429879 | 0.509999 |
| FENDRR__lincRNA       | 0.360544 | 0.382077 | 0.180472 | 20.6801  | 2.17913  | 5.57221  | 1.57035  | 5.92566  | 2.47666  | -4.94487 | -3.43343 | 1.511435 | 0.247279 | 0.146427 | 0.459522 |
| FER1L4__pseudogen     | 0.403587 | 1.12923  | 1.61714  | 2.05291  | 6.68603  | 6.47396  | 1.26758  | 1.15686  | 2.99749  | -2.27189 | -0.78347 | 1.488417 | 0.079033 | 0.194611 | 0.14069  |
| FER1L5__pseudogen     | 0.03704  | 2.03066  | 2.553    | 0.233512 | 28.6481  | 246.483  | 1.0701   | 2.06514  | 3.16486  | -5.89709 | -0.44726 | 5.449825 | 0.362966 | 0.192776 | 0.365338 |
| FGD5-AS1__antisense   | 23.0712  | 20.7028  | 10.8478  | 10.9309  | 7.79299  | 238.001  | 9.17478  | 24.3893  | 49.9621  | -2.23267 | -0.61275 | 1.619923 | 0.487875 | 0.599549 | 0.470297 |
| FGD5P1__pseudogen     | 0.021593 | 0.040738 | 0.112469 | 0.103458 | 2.64986  | 5.51281  | 0.161091 | 0.037803 | 0.084741 | -5.56343 | -0.69833 | 4.865103 | 0.221173 | 0.558292 | 0.234961 |
| FGF14-IT1__lincRNA    | 1.17189  | 0.106805 | 3.59979  | 0.079772 | 4.53529  | 53.1556  | 2.23886  | 0.030844 | 0.130961 | -3.56583 | 1.022999 | 4.588831 | 0.386373 | 0.605905 | 0.39977  |
| FLG-AS1__antisense    | 1.49556  | 1.39689  | 0.921418 | 4.07202  | 3.58974  | 398.421  | 1.7777   | 0.058089 | 0.809786 | -6.73438 | 0.527674 | 7.262049 | 0.415744 | 0.508641 | 0.414223 |
| FLI1-AS1__antisense   | 0        | 0.02876  | 0.719691 | 0        | 0.738012 | 0.116146 | 0.119274 | 4.62162  | 0        | -0.1906  | -2.66318 | -2.47258 | 0.934467 | 0.504339 | 0.422715 |
| FLNB-AS1__antisense   | 0        | 0        | 0        | 0        | 0        | 0        | 0        | 0        | 0        | #DIV/0!  | #DIV/0!  | #DIV/0!  | #DIV/0!  | #DIV/0!  | #DIV/0!  |
| FLVCR1-AS1__lincRNA   | 0.182973 | 0.817496 | 0.697001 | 0.505895 | 17.166   | 0.246997 | 0.458327 | 0.484328 | 0.874852 | -3.40002 | -0.09857 | 3.301449 | 0.427466 | 0.851722 | 0.44313  |
| FMO9P__pseudogen      | 0        | 0        | 0        | 0        | 1.65054  | 61.9657  | 0.112163 | 0        | 0.049815 | #NUM!    | #NUM!    | 8.617455 | 0.407481 | 0.238004 | 0.408516 |
| FOLH1B__pseudogen     | 0.948552 | 0.170937 | 0.269831 | 0.158726 | 3.2333   | 110.877  | 0.149563 | 0.033347 | 0.12456  | -6.36191 | 2.175859 | 8.537771 | 0.411028 | 0.241671 | 0.406168 |
| FOXI3__processed      | 0.099892 | 0.058909 | 0.124872 | 0        | 0.079749 | 12.3342  | 0.073283 | 0.054476 | 0.027122 | -5.45159 | 0.873068 | 6.324657 | 0.426408 | 0.266713 | 0.424913 |
| FOXP1-AS1__antisense  | 0.478771 | 0.388259 | 0.627217 | 0.276833 | 0.158958 | 4.07231  | 0.292388 | 0.097817 | 0.162308 | -1.5931  | 1.435338 | 3.028439 | 0.496894 | 0.060942 | 0.415995 |
| FOXP1-AS1__antisense  | 0        | 16.195   | 7.50016  | 19.9059  | 0        | 53.1556  | 1.43597  | 0        | 0        | -1.62452 | 4.044495 | 5.669014 | 0.455796 | 0.282252 | 0.265136 |
| FOXP1-IT1__sense      | 1.50253  | 2.09168  | 0.924047 | 2.21773  | 0.63603  | 3.65033  | 1.02244  | 2.45808  | 6.9491   | -0.52558 | -1.20685 | -0.68127 | 0.638576 | 0.436369 | 0.42674  |
| FRY-AS1__antisense    | 0        | 0        | 0        | 0        | 1.55872  | 0        | 7.49624  | 0.816611 | 0        | #NUM!    | #NUM!    | -2.41498 | 0.42265  | 0.363521 | 0.482336 |
| FTH1P10__pseudogen    | 2.10318  | 3.47459  | 0        | 0.952949 | 3.07725  | 1.50208  | 2.75425  | 2.36042  | 6.01339  | 0.011815 | -0.99644 | -1.00826 | 0.986414 | 0.478974 | 0.342043 |
| FUNDC2P2__pseudogen   | 1.20822  | 0.7903   | 0.47744  | 0.269221 | 0.281507 | 0.620167 | 0.516954 | 0.332523 | 0.607123 | 1.080376 | 0.765383 | -0.31499 | 0.300701 | 0.298689 | 0.348705 |
| FZD10-AS1__processed  | 0.097886 | 0.020986 | 0.026739 | 1.31033  | 0.572647 | 0.170742 | 0.096081 | 0.165519 | 0.116401 | -3.81804 | -1.37627 | 2.441777 | 0.177758 | 0.211205 | 0.245243 |
| GABPB1-AS1__processed | 1.27333  | 0        | 1.11548  | 3.13766  | 2.29831  | 13.8196  | 0        | 1.80186  | 1.47645  | -3.01091 | -0.45666 | 2.554252 | 0.253462 | 0.770295 | 0.27625  |
| GABRR3__polymorphic   | 0        | 0        | 0        | 0        | 2.27113  | 2.70349  | 0        | 0        | 0        | #NUM!    | #DIV/0!  | #DIV/0!  | 0.18657  | #DIV/0!  | 0.18657  |
| GACAT1__lincRNA       | 0        | 0        | 1.39391  | 0        | 1.53567  | 13.8044  | 0.125034 | 0        | 0        | -3.4601  | 3.478745 | 6.938841 | 0.356119 | 0.47654  | 0.367579 |
| GAPDHP60__pseudogen   | 593.232  | 26.3689  | 5.36259  | 7.7295   | 179.325  | 2.63515  | 80.7488  | 24.9237  | 349.692  | 1.720131 | 0.45675  | -1.26338 | 0.584728 | 0.841407 | 0.603453 |
| GAS5__processed       | 0        | 0        | 0        | 0        | 0        | 0        | 0        | 0        | 0        | #DIV/0!  | #DIV/0!  | #DIV/0!  | #DIV/0!  | #DIV/0!  | #DIV/0!  |
| GATA3-AS1__lincRNA    | 0.018357 | 0.0938   | 0.577249 | 0.684885 | 0.850374 | 0.937219 | 0.408654 | 0.047327 | 0.235482 | -1.84253 | -0.0043  | 1.838235 | 0.038454 | 0.997721 | 0.066606 |
| GBA3__polymorphic     | 48.7986  | 28.0658  | 12.9685  | 20.423   | 11.3951  | 26.7727  | 0.201886 | 41.0943  | 38.0114  | 0.61657  | 0.179785 | -0.43678 | 0.494576 | 0.891874 | 0.682284 |
| GBAP1__pseudogen      | 0        | 0        | 0        | 0        | 0        | 15.0513  | 0        | 0        | 0        | #NUM!    | #DIV/0!  | #DIV/0!  | 0.42265  | #DIV/0!  | 0.42265  |
| GBP1P1__pseudogen     | 5.99696  | 0.742092 | 1.26577  | 1.30097  | 1.53659  | 12.8983  | 0.698219 | 3.63403  | 1.07781  | -0.97511 | 0.565225 | 1.54034  | 0.644901 | 0.751951 | 0.504037 |
| GCOM2__pseudogen      | 8.71134  | 10.3322  | 6.08622  | 2.74686  | 2.19038  | 2.08301  | 2.23906  | 9.32327  | 6.02639  | 1.839803 | 0.514746 | -1.32506 | 0.037041 | 0.335367 | 0.252806 |
| GDI2P2__pseudogen     | 15.5602  | 1073.49  | 335.551  | 9.40036  | 5.45266  | 6.75576  | 373.484  | 16.185   | 8.49443  | 6.042797 | 1.839125 | -4.20367 | 0.275164 | 0.490519 | 0.40314  |

|                     |          |          |          |          |          |          |          |          |          |          |          |          |          |          |          |
|---------------------|----------|----------|----------|----------|----------|----------|----------|----------|----------|----------|----------|----------|----------|----------|----------|
| GDNF-AS1__lincRN    | 0.116095 | 0.065646 | 0.511566 | 0.414325 | 1.5533   | 18.4739  | 0.699645 | 0.147963 | 0.168632 | -4.88186 | -0.55167 | 4.33019  | 0.3675   | 0.726557 | 0.389196 |
| GGT3P__pseudoger    | 0.106013 | 0.08338  | 0.140245 | 0.103942 | 8.56847  | 95.9374  | 0.129458 | 0.058579 | 0.311329 | -8.30992 | -0.59922 | 7.710706 | 0.373975 | 0.438293 | 0.373899 |
| GHRLOS__antisens    | 0.70781  | 1.26196  | 0        | 0        | 1.41961  | 2.06606  | 0        | 0        | 1.32293  | -0.82341 | 0.57429  | 1.397699 | 0.600294 | 0.809514 | 0.220734 |
| GIMD1__lincRNA      | 0        | 0        | 0        | 0        | 3.28109  | 0        | 0        | 0        | 0        | #NUM!    | #DIV/0!  | #DIV/0!  | 0.42265  | #DIV/0!  | 0.42265  |
| GLTPP1__pseudoge    | 0        | 0        | 0        | 0        | 0        | 0        | 0        | 0.088336 | 0        | #DIV/0!  | #NUM!    | #NUM!    | #DIV/0!  | 0.42265  | 0.42265  |
| GLUD1P2__pseudog    | 0.082366 | 0.067629 | 0.309447 | 0.060656 | 0.675847 | 11.9432  | 1.52423  | 1.37965  | 1.65714  | -4.78649 | -3.3114  | 1.475093 | 0.394371 | 0.000802 | 0.549879 |
| GLYATL1P2__pseuc    | 0        | 0        | 0        | 0.416465 | 1.26339  | 7.80343  | 0.715321 | 0        | 0.863294 | #NUM!    | #NUM!    | 2.586728 | 0.308341 | 0.187067 | 0.353622 |
| GLYCAM1__pseudo     | 0        | 0        | 4.19814  | 0        | 2.59907  | 31.9494  | 0        | 0        | 0        | -3.0408  | #DIV/0!  | #DIV/0!  | 0.371329 | 0.42265  | 0.377738 |
| GLYCTK-AS1__proc    | 1.49179  | 1.16857  | 1.02137  | 3.28567  | 2.94102  | 7.12399  | 1.43199  | 1.70193  | 0.943738 | -1.85846 | -0.14736 | 1.711101 | 0.154589 | 0.578472 | 0.185137 |
| GMPSP1__pseudog     | 18.9592  | 9.91887  | 10.2176  | 6.71041  | 3.06688  | 3.91864  | 7.87904  | 12.4707  | 14.6003  | 1.513262 | 0.161715 | -1.35155 | 0.04675  | 0.803582 | 0.140633 |
| GNAQP1__pseudog     | 5.93094  | 4.14342  | 5.16953  | 55.4963  | 2.48067  | 25.7566  | 1.46054  | 8.84485  | 3.67592  | -2.45758 | 0.124732 | 2.582307 | 0.263592 | 0.890502 | 0.314166 |
| GNAS-AS1__antisen   | 1.80245  | 0.097014 | 0.727194 | 1.34885  | 11.3162  | 183.916  | 1.19997  | 0.076441 | 1.57403  | -6.22575 | -0.11796 | 6.107795 | 0.389865 | 0.875707 | 0.387752 |
| GNG12-AS1__antise   | 22.2254  | 31.9952  | 19.6992  | 16.1224  | 48.6409  | 66.378   | 14.4031  | 31.3417  | 21.8098  | -0.82709 | 0.129907 | 0.956996 | 0.338367 | 0.547885 | 0.232592 |
| GNRHR2__pseudog     | 12.595   | 6.91304  | 5.15297  | 5.00601  | 3.12385  | 2.08065  | 3.27352  | 5.73988  | 8.09098  | 1.272177 | 0.527866 | -0.74431 | 0.075223 | 0.55679  | 0.412958 |
| GOLGA2P6__pseud     | 0        | 0        | 0.196327 | 0        | 0.702257 | 1.82197  | 0.269012 | 0        | 0.10668  | -3.68451 | -0.93629 | 2.748219 | 0.241031 | 0.634794 | 0.337681 |
| GOLGA6L3__pseud     | 0.064738 | 0.224397 | 2.88151  | 0        | 3.92879  | 6.52596  | 0.970641 | 0.150207 | 2.41663  | -1.72131 | -0.15794 | 1.563365 | 0.190786 | 0.792549 | 0.29518  |
| GPHB5__processed    | 0        | 0        | 0        | 0        | 0        | 72.3795  | 0        | 0        | 0        | #NUM!    | #DIV/0!  | #DIV/0!  | 0.42265  | #DIV/0!  | 0.42265  |
| GRIK1-AS1__antiser  | 0.036021 | 0.034774 | 1.61714  | 0.142538 | 67.8347  | 40.2585  | 0.701854 | 0        | 0.039023 | -6.00277 | 1.187954 | 7.190727 | 0.211729 | 0.680837 | 0.213044 |
| GRIP2__processed    | 0        | 0        | 8.77723  | 0        | 37.5408  | 63.0913  | 1.69369  | 0        | 0        | -3.51918 | 2.373596 | 5.892777 | 0.196785 | 0.542497 | 0.22214  |
| G RTP1-AS1__antise  | 0        | 0        | 0        | 0        | 0        | 12.0874  | 0        | 0        | 0        | #NUM!    | #DIV/0!  | #DIV/0!  | 0.42265  | #DIV/0!  | 0.42265  |
| GS1-120K12.4__linc  | 0        | 0        | 0.02947  | 0        | 0.630669 | 0        | 0.148163 | 0        | 0        | -4.41957 | -2.32987 | 2.089698 | 0.450228 | 0.546372 | 0.569994 |
| GS1-122H1.2__lincR  | 1.18932  | 0        | 1.7817   | 7.67606  | 11.715   | 899.74   | 1.02739  | 0        | 0        | -8.27317 | 1.531974 | 9.805143 | 0.411012 | 0.372762 | 0.410932 |
| GS1-204I12.1__lincF | 0        | 0.128704 | 0        | 0.77411  | 7.69231  | 36.5986  | 0        | 0.785283 | 0.126505 | -8.45181 | -2.82464 | 5.627166 | 0.305939 | 0.323846 | 0.313413 |
| GS1-204I12.4__lincF | 0.036878 | 0.217524 | 0.184188 | 0        | 1.30399  | 36.9843  | 0.179903 | 0.200646 | 0        | -6.44789 | 0.204789 | 6.652677 | 0.406442 | 0.856679 | 0.408504 |
| GS1-279B7.1__lincR  | 0.357709 | 0        | 1.7311   | 0        | 12.8537  | 15.6548  | 0.460861 | 0.534287 | 1.03252  | -3.77064 | 0.042859 | 3.813499 | 0.195196 | 0.960136 | 0.200618 |
| GS1-410F4.4__lincR  | 0        | 0        | 0.012344 | 0        | 3.13613  | 7.28353  | 0.075523 | 0.053918 | 0.013428 | -9.72128 | -3.53281 | 6.188469 | 0.241203 | 0.187956 | 0.248648 |
| GSTTP1__pseudoge    | 0        | 0        | 0        | 0        | 6.08776  | 0        | 0.391016 | 0        | 0.235575 | #NUM!    | #NUM!    | 3.280316 | 0.42265  | 0.207524 | 0.483524 |
| GSTTP2__pseudoge    | 0        | 0.068386 | 0.094337 | 0        | 2.47026  | 13.5541  | 0.182068 | 0        | 0.142048 | -6.62171 | -0.9941  | 5.627613 | 0.330203 | 0.534688 | 0.335389 |
| GTF2H2B__pseudog    | 1.44668  | 1.15293  | 0.57386  | 0.716305 | 4.61124  | 0.296922 | 0.950463 | 1.08706  | 0.980986 | -0.82566 | 0.072225 | 0.89788  | 0.600871 | 0.861341 | 0.581789 |
| GUCY1B2__pseudog    | 1.44678  | 3.76157  | 1.28721  | 1.85865  | 13.9799  | 227.522  | 4.39896  | 1.53189  | 0.245117 | -5.2275  | 0.072789 | 5.300286 | 0.396138 | 0.951993 | 0.39842  |
| GUSBP11__process    | 1.79222  | 1.85778  | 2.62043  | 5.42479  | 15.3279  | 288.191  | 1.59174  | 2.43751  | 1.80988  | -5.62264 | 0.102811 | 5.725447 | 0.388801 | 0.755031 | 0.389608 |
| GUSBP1__pseudoge    | 46.9283  | 77.9561  | 13.8548  | 75.4054  | 29.883   | 374.648  | 13.7218  | 18.0245  | 15.1588  | -1.79047 | 1.564559 | 3.355027 | 0.46044  | 0.226302 | 0.314918 |
| GUSBP3__pseudoge    | 7.4114   | 7.45134  | 7.8209   | 6.26985  | 42.6658  | 899.74   | 35.0375  | 5.73168  | 7.06966  | -5.38619 | -1.07653 | 4.309661 | 0.401061 | 0.475497 | 0.418168 |
| GUSBP5__pseudoge    | 0.015142 | 0.035714 | 0.788648 | 0        | 2.03725  | 112.843  | 0.089059 | 0.033095 | 0.197789 | -7.09638 | 1.391724 | 8.488102 | 0.412509 | 0.496249 | 0.412927 |
| GUSBP9__pseudoge    | 4.28505  | 12.642   | 16.8345  | 2.76065  | 19.2311  | 67.3858  | 16.7364  | 10.6024  | 4.52248  | -1.40453 | 0.083577 | 1.488108 | 0.370415 | 0.937766 | 0.488915 |

|                    |          |          |          |          |          |          |          |          |          |          |          |          |          |          |          |
|--------------------|----------|----------|----------|----------|----------|----------|----------|----------|----------|----------|----------|----------|----------|----------|----------|
| GVINP1__pseudoge   | 5.31955  | 0.268627 | 1.34504  | 5.03952  | 18.3935  | 148.178  | 1.25243  | 4.38645  | 1.01174  | -4.62947 | 0.060036 | 4.68951  | 0.357362 | 0.971856 | 0.355964 |
| H19__processed_tra | 53.485   | 4.97562  | 17.7641  | 0.522863 | 2.58055  | 4.63358  | 0.363757 | 6.35523  | 1.74252  | 3.300414 | 3.171272 | -0.12914 | 0.276038 | 0.295103 | 0.912072 |
| H1FX-AS1__antisen  | 6.63713  | 4.85603  | 7.04006  | 0        | 6.48752  | 2.82472  | 1.19266  | 8.36932  | 0        | 0.992913 | 0.954732 | -0.03818 | 0.337027 | 0.458663 | 0.959921 |
| HAND2-AS1__antise  | 2.95668  | 1.29036  | 1.04239  | 0.236095 | 10.7322  | 8.72071  | 0.370177 | 0.178457 | 0.341865 | -1.89621 | 2.570426 | 4.466632 | 0.333324 | 0.124601 | 0.194623 |
| HAR1B__lincRNA     | 0.166515 | 0.074551 | 0.451699 | 0.230218 | 1.50426  | 11.7262  | 0.771712 | 0.092204 | 0.33505  | -4.28024 | -0.79135 | 3.488889 | 0.351379 | 0.526013 | 0.383932 |
| HBBP1__pseudogen   | 0        | 0        | 0        | 0        | 1.40111  | 0        | 0        | 0        | 0        | #NUM!    | #DIV/0!  | #DIV/0!  | 0.42265  | #DIV/0!  | 0.42265  |
| HBZP1__pseudogen   | 0        | 0        | 0        | 0        | 0        | 13.4916  | 1.01661  | 0        | 1.44481  | #NUM!    | #NUM!    | 2.454499 | 0.42265  | 0.195585 | 0.473244 |
| HCCAT3__antisense  | 0.492237 | 0.106276 | 0        | 244.219  | 4.56069  | 7.28353  | 4.65521  | 0.905686 | 0.485099 | -8.7409  | -3.33653 | 5.404376 | 0.395215 | 0.262872 | 0.397769 |
| HCCAT5__lincRNA    | 0        | 0.035334 | 0        | 0        | 1.6136   | 0        | 0.14635  | 0        | 0        | -5.51307 | -2.05029 | 3.462788 | 0.42265  | 0.574275 | 0.47716  |
| HERC2P10__pseudc   | 0        | 0        | 1.21625  | 2.19024  | 2.16932  | 19.0677  | 0.623553 | 0.099457 | 0.197634 | -4.26768 | 0.401725 | 4.669402 | 0.29213  | 0.857593 | 0.317811 |
| HERC2P3__pseudoc   | 6.86655  | 2.15677  | 2.50774  | 2.2215   | 48.803   | 4.22859  | 1.68926  | 5.35671  | 1.69522  | -2.26053 | 0.399624 | 2.660154 | 0.461869 | 0.737682 | 0.383006 |
| HERC2P4__pseudoc   | 0.12154  | 5.26575  | 1.49291  | 3.48254  | 2.54813  | 8.40911  | 1.99727  | 0.508421 | 0.131967 | -1.06953 | 1.383193 | 2.452719 | 0.46485  | 0.537123 | 0.212549 |
| HERC2P5__pseudoc   | 0.056064 | 0.075571 | 0.129501 | 0        | 0.389475 | 0.686203 | 0.483495 | 0.193675 | 0.184156 | -2.04237 | -1.72176 | 0.320615 | 0.266978 | 0.224446 | 0.829063 |
| HERC2P9__pseudoc   | 7.26277  | 7.78211  | 12.0382  | 7.18853  | 6.37112  | 12.9662  | 4.82377  | 8.27021  | 5.20777  | 0.029993 | 0.56541  | 0.535417 | 0.809685 | 0.302553 | 0.430002 |
| HEXA-AS1__antisen  | 0        | 0        | 0        | 0        | 0        | 0        | 0        | 0        | 0        | #DIV/0!  | #DIV/0!  | #DIV/0!  | #DIV/0!  | #DIV/0!  | #DIV/0!  |
| HHIP-AS1__antisens | 0        | 0        | 0        | 0        | 0        | 0        | 0        | 0        | 0        | #DIV/0!  | #DIV/0!  | #DIV/0!  | #DIV/0!  | #DIV/0!  | #DIV/0!  |
| HIF1A-AS2__lincRN  | 80.6255  | 7.64337  | 2.11418  | 2.11803  | 18.6658  | 56.3324  | 1.34003  | 72.8012  | 2.76266  | 0.229018 | 0.232996 | 0.003978 | 0.920249 | 0.92417  | 0.99839  |
| HILS1__pseudogene  | 0.259929 | 0.306558 | 0.403337 | 0.522997 | 5.30437  | 118.169  | 1.27488  | 0.280169 | 0.306053 | -6.99836 | -0.94036 | 6.057997 | 0.397402 | 0.495483 | 0.402277 |
| HLA-AS1__antisense | 1.20325  | 0.689035 | 2.73508  | 3.154    | 17.6279  | 30.3928  | 0.70546  | 0.943679 | 0.783358 | -3.46717 | 0.927753 | 4.394921 | 0.172881 | 0.375832 | 0.174126 |
| HM13-AS1__antisen  | 0.527569 | 1.37677  | 1.31555  | 1.0721   | 2.19038  | 3.02564  | 0.319064 | 0.089041 | 0.442482 | -0.96562 | 1.92048  | 2.886097 | 0.10102  | 0.12855  | 0.080445 |
| HMGB1P5__pseudoc   | 83.2581  | 136.142  | 3.57468  | 54.7826  | 1.10084  | 36.4762  | 6.83484  | 91.3078  | 114.877  | 1.271546 | 0.065894 | -1.20565 | 0.468484 | 0.959599 | 0.459032 |
| HMGB3P1__pseudoc   | 0        | 0.044385 | 0.526109 | 0.049599 | 0.677512 | 0.213765 | 0        | 0.081868 | 0.122229 | -0.72179 | 1.482953 | 2.204747 | 0.697847 | 0.478474 | 0.296514 |
| HMG1P38__pseudoc   | 85.3985  | 39.3914  | 62.6538  | 6.52834  | 2.18505  | 8.02574  | 45.6548  | 28.5023  | 18.7722  | 3.485161 | 1.012252 | -2.47291 | 0.042241 | 0.093517 | 0.09045  |
| HMG2P46__pseudoc   | 15.1921  | 11.7205  | 9.97307  | 5.25563  | 7.26076  | 45.5891  | 3.83076  | 8.31965  | 6.95212  | -0.65561 | 0.949297 | 1.604911 | 0.671055 | 0.161057 | 0.417795 |
| HNF1A-AS1__antise  | 1.46401  | 2.53349  | 2.02824  | 3.91107  | 5.15491  | 438.263  | 1.11027  | 4.85618  | 8.94509  | -6.21405 | -1.30722 | 4.906835 | 0.415961 | 0.29771  | 0.418494 |
| HNRNPA1P54__pse    | 0        | 0        | 0        | 3.27395  | 3.67733  | 27.366   | 0        | 0        | 0        | #NUM!    | #DIV/0!  | #DIV/0!  | 0.287437 | #DIV/0!  | 0.287437 |
| HNRNPA3P1__pseu    | 0.052037 | 0.026844 | 0.169378 | 0.103845 | 0.198498 | 0.130993 | 0.08458  | 0.026684 | 0.148867 | -0.80364 | -0.06739 | 0.736249 | 0.417257 | 0.821821 | 0.424667 |
| HNRNPA3P6__pseu    | 33.628   | 55.1328  | 53.3832  | 43.5089  | 24.861   | 32.7241  | 33.5427  | 39.2207  | 38.8214  | 0.491656 | 0.349213 | -0.14244 | 0.37562  | 0.182027 | 0.672818 |
| HNRNPF1__pseudoc   | 0        | 0        | 0        | 0        | 0        | 8.74639  | 0        | 0        | 0        | #NUM!    | #DIV/0!  | #DIV/0!  | 0.42265  | #DIV/0!  | 0.42265  |
| HNRNPK2__pseudoc   | 198.861  | 193.997  | 190.158  | 96.1215  | 39.9542  | 72.6098  | 62.1145  | 145.576  | 718.086  | 1.482205 | -0.66713 | -2.14933 | 0.014601 | 0.638549 | 0.367866 |
| HNRNPK3__pseudoc   | 0        | 0        | 0.032161 | 0        | 84.5797  | 288.191  | 0.908467 | 0        | 0        | -13.5007 | -4.82005 | 8.680639 | 0.283417 | 0.443437 | 0.285179 |
| HNRNPK4__pseudoc   | 40.4014  | 20.2725  | 24.3643  | 14.2821  | 13.4446  | 7.97255  | 16.3606  | 30.4001  | 25.35    | 1.252217 | 0.237898 | -1.01432 | 0.098082 | 0.714095 | 0.137294 |
| HNRNPLP2__pseudoc  | 537.613  | 39.5754  | 47.0249  | 30.6276  | 30.5874  | 15.4959  | 31.2732  | 67.1885  | 42.5458  | 3.024536 | 2.146267 | -0.87827 | 0.377809 | 0.449867 | 0.184436 |
| HNRNPU-AS1__anti   | 181.515  | 106.19   | 23.7005  | 30.0239  | 239.823  | 16.1949  | 0        | 60.1613  | 14.2113  | 0.122568 | 2.065951 | 1.943383 | 0.927559 | 0.270129 | 0.329136 |
| HOTAIR__antisense  | 0.61952  | 0.395918 | 0.828725 | 0.73725  | 0.535966 | 4.6007   | 0.58723  | 0.041839 | 0.166585 | -1.67136 | 1.212753 | 2.884109 | 0.383918 | 0.194534 | 0.343217 |

|                     |          |          |          |          |          |          |          |          |          |          |          |          |          |          |          |
|---------------------|----------|----------|----------|----------|----------|----------|----------|----------|----------|----------|----------|----------|----------|----------|----------|
| HOXB-AS3__antisen   | 87.9409  | 128.789  | 19.1825  | 199.997  | 80.6842  | 48.4066  | 73.0805  | 33.6513  | 30.4745  | -0.48022 | 0.781905 | 1.262126 | 0.571008 | 0.412199 | 0.188604 |
| HOXC-AS3__antiser   | 0        | 0        | 0.115124 | 1.12794  | 0.223741 | 1.65151  | 0.112798 | 0.045723 | 0.056938 | -4.70524 | -0.90423 | 3.80101  | 0.131123 | 0.5706   | 0.152293 |
| HOXD-AS1__antiser   | 0.348063 | 6.48082  | 2.36867  | 2.04168  | 48.8374  | 86.2914  | 0.24246  | 2.08391  | 0.979178 | -3.89858 | 1.476361 | 5.374937 | 0.214164 | 0.262484 | 0.205684 |
| HOXD-AS2__antiser   | 4.11276  | 3.67763  | 0.565363 | 5.40404  | 3.27255  | 0.792761 | 0.708514 | 1.63606  | 0.543385 | -0.1805  | 1.53272  | 1.713215 | 0.53149  | 0.204739 | 0.236807 |
| HPN-AS1__antisens   | 4.11769  | 3.54536  | 2.21467  | 7.76799  | 48.1805  | 31.4069  | 2.18299  | 0.120815 | 0.249835 | -3.14465 | 1.951623 | 5.09627  | 0.163243 | 0.038247 | 0.149216 |
| HSD17B7P2__pseuc    | 1.36028  | 6.59812  | 1.07764  | 5.18563  | 11.1724  | 9.26995  | 4.69163  | 1.90704  | 7.38189  | -1.50396 | -0.62966 | 0.874298 | 0.054608 | 0.665531 | 0.289801 |
| HSFY1P1__pseudog    | 0        | 0        | 0.067733 | 0        | 0.120243 | 0        | 0.02209  | 0        | 0        | -0.82802 | 1.616485 | 2.444507 | 0.780326 | 0.630114 | 0.536471 |
| HSP90AA4P__pseuc    | 0.075255 | 0.088761 | 0        | 0        | 0        | 0.477788 | 0.171758 | 0.082079 | 0        | -1.54253 | -0.63006 | 0.912468 | 0.631613 | 0.463909 | 0.748601 |
| HSP90AA6P__pseuc    | 0        | 0        | 0        | 0        | 0        | 0        | 0.489153 | 0        | 0        | #DIV/0!  | #NUM!    | #NUM!    | #DIV/0!  | 0.42265  | 0.42265  |
| HSP90AB3P__pseuc    | 118.903  | 89.4622  | 69.7704  | 25.616   | 30.6884  | 18.8061  | 59.5271  | 73.8748  | 84.1972  | 1.888702 | 0.354116 | -1.53459 | 0.034991 | 0.445756 | 0.036559 |
| HSP90B2P__pseudc    | 135.297  | 233.868  | 4.42055  | 3.67192  | 14.0211  | 6.76509  | 6.93604  | 124.125  | 3.88457  | 3.933054 | 1.469061 | -2.46399 | 0.213386 | 0.18416  | 0.421091 |
| HSP90B3P__pseudc    | 1.21247  | 0.027036 | 0.091716 | 0.091097 | 4.65352  | 0        | 0.998912 | 0        | 4.38603  | -1.83354 | -2.01618 | -0.18264 | 0.586098 | 0.45568  | 0.942762 |
| HSPA8P5__pseudog    | 1518.88  | 873.96   | 1033.88  | 324.976  | 239.627  | 233.001  | 56.0913  | 960.762  | 1122.89  | 2.103084 | 0.679391 | -1.42369 | 0.034012 | 0.493866 | 0.341385 |
| HSPD1P1__pseudog    | 70.6918  | 57.8233  | 26.3317  | 9.91067  | 27.9528  | 10.1747  | 25.0758  | 58.0055  | 19.6216  | 1.688588 | 0.592365 | -1.09622 | 0.114313 | 0.347059 | 0.097304 |
| HTR3E-AS1__antise   | 0.063173 | 0        | 0.653844 | 0        | 8.02518  | 9.63854  | 0.247662 | 0.05177  | 0.10313  | -4.62264 | 0.832797 | 5.455436 | 0.187838 | 0.688644 | 0.198396 |
| HTR5BP__pseudoge    | 0        | 0.241319 | 3.11991  | 6.75301  | 2.46781  | 14.2501  | 0.530906 | 0        | 0        | -2.80381 | 2.66246  | 5.466274 | 0.120937 | 0.485156 | 0.158758 |
| HTT-AS__antisense   | 0        | 0        | 0        | 0        | 0        | 1.69208  | 0.561587 | 0        | 0        | #NUM!    | #NUM!    | 1.591216 | 0.42265  | 0.42265  | 0.633904 |
| HUNK-AS1__antisen   | 0        | 0        | 0.294703 | 0        | 13.6958  | 2.81853  | 0.229678 | 0        | 0        | -5.80831 | 0.359649 | 6.167962 | 0.327579 | 0.899521 | 0.327697 |
| HYI-AS1__antisense  | 0        | 0        | 0        | 0        | 1.9737   | 17.7928  | 0        | 0        | 0        | #NUM!    | #DIV/0!  | #DIV/0!  | 0.362516 | #DIV/0!  | 0.362516 |
| IDI2-AS1__antisense | 15.0472  | 17.5976  | 19.9214  | 11.922   | 4.11123  | 5.51143  | 12.3358  | 12.9173  | 11.6466  | 1.286805 | 0.510526 | -0.77628 | 0.103697 | 0.085046 | 0.174598 |
| IFNG-AS1__antisens  | 5.91589  | 0.038991 | 0.742337 | 3.72954  | 1313.28  | 40.1295  | 1.17861  | 2.89622  | 2.14097  | -7.66279 | 0.107622 | 7.770413 | 0.406563 | 0.951291 | 0.405039 |
| IGBP1P1__pseudog    | 3.49665  | 2.44565  | 2.06428  | 2.36925  | 1.01826  | 2.69167  | 3.45415  | 1.96229  | 1.67263  | 0.397309 | 0.17559  | -0.22172 | 0.421654 | 0.15049  | 0.669198 |
| IGF2-AS__antisense  | 0        | 0        | 0        | 0        | 0        | 0        | 0        | 0        | 0        | #DIV/0!  | #DIV/0!  | #DIV/0!  | #DIV/0!  | #DIV/0!  | #DIV/0!  |
| IGFBP7-AS1__antise  | 233.395  | 108.936  | 31.5349  | 45.7262  | 79.1601  | 25.6702  | 0        | 74.7678  | 62.855   | 1.312216 | 1.441801 | 0.129585 | 0.321814 | 0.426799 | 0.873652 |
| IGHEP1__IG_C_pse    | 0        | 0        | 0        | 0        | 0        | 51.2381  | 0        | 0        | 0        | #NUM!    | #DIV/0!  | #DIV/0!  | 0.42265  | #DIV/0!  | 0.42265  |
| IGHV4OR15-8__IG_    | 0.723856 | 0        | 0.154766 | 0.761548 | 3.19818  | 0        | 0.357845 | 0.767148 | 0        | -2.17209 | -0.3566  | 1.815485 | 0.444473 | 0.835361 | 0.335869 |
| IGKV4-1__IG_V_ger   | 62.0985  | 1.47991  | 13.1573  | 89.3855  | 31.6942  | 14.6542  | 2.01934  | 135.689  | 5.31885  | -0.82281 | -0.89832 | -0.07551 | 0.163896 | 0.740082 | 0.969071 |
| IGLL3P__pseudoger   | 0        | 0        | 1.19841  | 0        | 7.68692  | 2.73054  | 0.808739 | 0        | 0        | -3.11981 | 0.567375 | 3.687186 | 0.320932 | 0.84439  | 0.323256 |
| IGLV4-60__IG_V_ge   | 0.622675 | 0        | 1.39084  | 0        | 2.31793  | 0        | 0        | 0.743642 | 1.84268  | -0.20312 | -0.36119 | -0.15806 | 0.936642 | 0.690923 | 0.936064 |
| IL10RB-AS1__antise  | 0        | 0        | 0        | 0        | 0        | 1.96053  | 0        | 0        | 0        | #NUM!    | #DIV/0!  | #DIV/0!  | 0.42265  | #DIV/0!  | 0.42265  |
| IL12A-AS1__antisen  | 0.342061 | 0.216447 | 0.774107 | 2.29228  | 20.317   | 73.2715  | 1.45266  | 0.428792 | 0.912568 | -6.16891 | -1.06808 | 5.100827 | 0.274659 | 0.259331 | 0.283867 |
| IL21-AS1__antisens  | 0.206942 | 0        | 0        | 0        | 152.22   | 148.732  | 0.438019 | 0.080154 | 0.374043 | -10.5061 | -2.10817 | 8.397925 | 0.18412  | 0.114716 | 0.18476  |
| IL21R-AS1__antisen  | 0        | 0        | 0        | 0        | 4.62311  | 0        | 0        | 0        | 0        | #NUM!    | #DIV/0!  | #DIV/0!  | 0.42265  | #DIV/0!  | 0.42265  |
| ILF3-AS1__lincRNA   | 1.09236  | 0.370571 | 0.561722 | 1.35143  | 1.50393  | 1.1935   | 0.579414 | 0.850357 | 1.41712  | -0.99984 | -0.49171 | 0.508129 | 0.116756 | 0.57109  | 0.330119 |
| INTS6-AS1__antisen  | 5.72227  | 13.6308  | 8.01479  | 154.281  | 66.5216  | 19.0677  | 9.6861   | 7.78095  | 6.84612  | -3.1317  | 0.170745 | 3.302445 | 0.223885 | 0.753762 | 0.205027 |

|                    |          |          |          |          |          |          |          |          |          |          |          |          |          |          |          |
|--------------------|----------|----------|----------|----------|----------|----------|----------|----------|----------|----------|----------|----------|----------|----------|----------|
| INTS6P1__pseudoge  | 27.4822  | 53.0738  | 20.7155  | 19.5942  | 7.78497  | 57.3175  | 16.6179  | 27.2906  | 12.9501  | 0.257851 | 0.832778 | 0.574927 | 0.837149 | 0.116906 | 0.669002 |
| IPO7P2__pseudoger  | 144.352  | 40.8636  | 53.6129  | 101.948  | 56.5829  | 246.483  | 14.5496  | 57.7343  | 163.261  | -0.762   | 0.019973 | 0.781969 | 0.515666 | 0.988897 | 0.189293 |
| IPO8P1__pseudoger  | 115.286  | 137.062  | 156.516  | 135.482  | 8.61524  | 54.6877  | 62.9076  | 154.478  | 189.266  | 1.040413 | 0.007828 | -1.03258 | 0.265594 | 0.980098 | 0.432073 |
| IPO9-AS1__antisens | 5.47028  | 11.584   | 4.21244  | 38.7091  | 19.7037  | 19.0677  | 3.57415  | 3.35734  | 3.88374  | -1.86524 | 0.975533 | 2.840769 | 0.129935 | 0.285791 | 0.075222 |
| IQCF5-AS1__antiser | 0        | 0        | 0.075464 | 0        | 2.37782  | 17.4485  | 0.293492 | 0        | 0        | -8.03742 | -1.95947 | 6.077952 | 0.349692 | 0.584611 | 0.35969  |
| IQCH-AS1__lincRNA  | 2.77723  | 1.52665  | 1.49759  | 14.7873  | 10.9527  | 61.9657  | 3.38104  | 2.07688  | 4.65266  | -3.91818 | -0.80138 | 3.116805 | 0.241772 | 0.236643 | 0.242063 |
| ITGB2-AS1__antiser | 0        | 0        | 0        | 3.99882  | 0        | 4.7185   | 0        | 0        | 0        | #NUM!    | #DIV/0!  | #DIV/0!  | 0.186272 | #DIV/0!  | 0.186272 |
| JMJD1C-AS1__antis  | 0.82589  | 0        | 0        | 0        | 1.37148  | 2.97632  | 0.752618 | 1.55592  | 0        | -2.39626 | -1.48296 | 0.913306 | 0.398334 | 0.450448 | 0.617183 |
| JRKL-AS1__lincRNA  | 0        | 0        | 0        | 0        | 46.1641  | 17.1353  | 0.764228 | 0        | 0        | #NUM!    | #NUM!    | 6.372045 | 0.257825 | 0.42265  | 0.266874 |
| KCNC4-AS1__antise  | 0.184859 | 0.163586 | 0.184492 | 0        | 0        | 1.70115  | 0.315004 | 0.050198 | 0.04995  | -1.67447 | 0.360325 | 2.034798 | 0.561069 | 0.689273 | 0.558507 |
| KCNJ2-AS1__antise  | 0.303779 | 0.171944 | 3.75531  | 0.242299 | 2.22627  | 0.221161 | 0.154943 | 1.3368   | 0.291182 | 0.653549 | 1.246764 | 0.593215 | 0.782337 | 0.613585 | 0.416006 |
| KCNQ1-AS1__antise  | 0.0297   | 0        | 0.511816 | 0        | 3.38061  | 579.152  | 0.11609  | 0        | 0.083216 | -10.0711 | 1.442022 | 11.51314 | 0.419316 | 0.54811  | 0.419405 |
| KCNQ1DN__antisen   | 0.029481 | 0        | 0.14735  | 0.194844 | 0        | 1.90118  | 0.374523 | 0        | 0        | -3.56721 | -1.08268 | 2.484529 | 0.371003 | 0.695786 | 0.479534 |
| KCNQ1OT1__antise   | 3.40095  | 0.66351  | 2.27912  | 5.11737  | 43.9205  | 17.743   | 4.97339  | 2.06664  | 25.0218  | -3.39607 | -2.33749 | 1.058578 | 0.240952 | 0.349896 | 0.528156 |
| KCTD21-AS1__antis  | 7.87815  | 2.31192  | 4.40937  | 4.62204  | 10.1168  | 17.4136  | 5.68918  | 7.17322  | 8.40968  | -1.13902 | -0.54305 | 0.595967 | 0.346693 | 0.422014 | 0.341034 |
| KDM4A-AS1__antise  | 0        | 0        | 0        | 0        | 32.8713  | 28.2325  | 0        | 0        | 0.676825 | #NUM!    | #NUM!    | 6.496335 | 0.185846 | 0.42265  | 0.186644 |
| KIF9-AS1__antisens | 1.89257  | 0        | 0.955515 | 7.11217  | 39.9278  | 74.2234  | 1.40165  | 0        | 0.931483 | -5.41201 | 0.287724 | 5.699731 | 0.182253 | 0.395111 | 0.179218 |
| KIR2DS4__polymorp  | 0.006554 | 0        | 5.05156  | 0.023281 | 0.085992 | 3.92551  | 1.25563  | 0        | 0.01069  | 0.326109 | 1.997957 | 1.671848 | 0.476896 | 0.57846  | 0.610638 |
| KIRREL3-AS3__anti  | 0        | 0        | 0.068829 | 0.022818 | 0.073428 | 0.246487 | 0.067384 | 0        | 0.037412 | -2.31599 | -0.6065  | 1.709494 | 0.1831   | 0.720695 | 0.39224  |
| KLKP1__pseudogen   | 0        | 0.033638 | 0.702466 | 0.155348 | 3.21054  | 2.52977  | 1.35915  | 0.155413 | 0.063659 | -3.00167 | -1.10032 | 1.901352 | 0.187926 | 0.677313 | 0.393017 |
| KLRAP1__pseudoge   | 10.4698  | 0        | 0        | 3.27279  | 0.665668 | 0.832902 | 1.47322  | 8.85581  | 0        | 1.133761 | 0.019529 | -1.11423 | 0.547802 | 0.993562 | 0.619223 |
| KMT2B__processed   | 1.50955  | 2.28992  | 2.45573  | 31.6312  | 1.99484  | 6.61127  | 2.67074  | 3.49245  | 1.76835  | -2.68541 | -0.34254 | 2.342861 | 0.354797 | 0.464535 | 0.365603 |
| KRBOX1-AS1__antis  | 0        | 0        | 0        | 0        | 0.104997 | 0.402897 | 0.220121 | 0        | 0        | #NUM!    | #NUM!    | 1.206231 | 0.295712 | 0.42265  | 0.647219 |
| KRT16P1__pseudog   | 0.0161   | 0        | 0.359341 | 0        | 1.02941  | 0.91514  | 0.14077  | 0        | 0.128017 | -2.37278 | 0.482124 | 2.854901 | 0.225693 | 0.765672 | 0.257755 |
| KRT16P2__pseudog   | 0        | 0.092045 | 0.227771 | 0.077627 | 0.249763 | 0.159896 | 0.0138   | 0.021304 | 0.02829  | -0.60753 | 2.33482  | 2.942347 | 0.486887 | 0.302012 | 0.097822 |
| KRT16P3__pseudog   | 0.05973  | 0        | 0.443209 | 0.103452 | 0.413392 | 0.310877 | 0.171742 | 0.034052 | 0.042397 | -0.71876 | 1.018929 | 1.73769  | 0.570173 | 0.647767 | 0.28769  |
| KRT16P4__pseudog   | 15.5193  | 124.73   | 101.552  | 4.96971  | 1.11789  | 115.125  | 394.165  | 56.9924  | 28.8428  | 0.996282 | -0.98921 | -1.9855  | 0.44214  | 0.648697 | 0.485404 |
| KRT17P2__pseudog   | 0.032559 | 0        | 0        | 1.28081  | 1.3769   | 0        | 0        | 0        | 0        | -6.35099 | #DIV/0!  | #DIV/0!  | 0.184482 | 0.42265  | 0.184037 |
| KRT18P17__pseudo   | 73.9378  | 53.5764  | 89.9217  | 203.062  | 6.3748   | 230.002  | 37.9685  | 124.071  | 70.9922  | -1.01507 | -0.09994 | 0.915136 | 0.346967 | 0.889346 | 0.537507 |
| KRT18P29__pseudo   | 938.534  | 763.008  | 126.975  | 250.54   | 49.4373  | 181.029  | 93.5003  | 887.392  | 572.459  | 1.926546 | 0.23529  | -1.69126 | 0.216288 | 0.835086 | 0.340035 |
| KRT18P55__pseudo   | 0        | 0        | 0.965405 | 0        | 6.31487  | 17.7696  | 0.739658 | 0.008447 | 0        | -4.64083 | 0.367893 | 5.008718 | 0.256455 | 0.896845 | 0.285996 |
| KRT19P2__pseudog   | 0        | 0        | 0.258036 | 0        | 1.63144  | 1.65213  | 0.062803 | 0.280327 | 0        | -3.66962 | -0.41118 | 3.258439 | 0.186004 | 0.872772 | 0.204907 |
| KRT42P__pseudoge   | 0.050752 | 0.024211 | 0.187263 | 0.245806 | 2.06814  | 2.65867  | 0.397642 | 0.044918 | 0.205642 | -4.24512 | -1.30563 | 2.93949  | 0.153588 | 0.359633 | 0.215704 |
| KRT8P10__pseudog   | 24.5125  | 67.6165  | 141.151  | 9.53861  | 134.877  | 21.7163  | 59.5563  | 107.758  | 63.973   | 0.489733 | 0.012377 | -0.47736 | 0.718843 | 0.987733 | 0.469219 |
| KRT8P12__pseudog   | 0.856721 | 1.96551  | 1.81523  | 2.18186  | 2.54348  | 0.780781 | 1.25742  | 1.59246  | 1.24921  | -0.2477  | 0.178031 | 0.425733 | 0.717878 | 0.605281 | 0.422463 |

|                     |          |          |          |          |          |          |          |          |          |          |          |          |          |          |          |
|---------------------|----------|----------|----------|----------|----------|----------|----------|----------|----------|----------|----------|----------|----------|----------|----------|
| KRT8P41__pseudog    | 0.099485 | 0        | 0.199143 | 0        | 0.070829 | 0.174366 | 0.146233 | 0        | 0.054127 | 0.28442  | 0.575757 | 0.291337 | 0.752433 | 0.627636 | 0.871939 |
| KRT8P45__pseudog    | 2.96503  | 10.7668  | 20.8997  | 4.16489  | 2.1964   | 2.61206  | 6.58853  | 13.2239  | 499.256  | 1.948368 | -3.90577 | -5.85413 | 0.267801 | 0.415335 | 0.407166 |
| KRTAP5-AS1__antis   | 0.591574 | 2.13431  | 3.61154  | 2.6904   | 24.776   | 47.9241  | 2.21988  | 2.57993  | 0.925213 | -3.57241 | 0.146615 | 3.719029 | 0.199541 | 0.88856  | 0.226194 |
| KTN1-AS1__antisens  | 0.887118 | 1.09483  | 1.15054  | 29.1228  | 39.9278  | 95.6924  | 1.61959  | 1.09341  | 1.59092  | -5.71676 | -0.45834 | 5.258422 | 0.120046 | 0.208664 | 0.121575 |
| LA16c-2F2.8__lincRl | 0.008792 | 0        | 0.123176 | 1.16915  | 4.40202  | 0.618871 | 0.295721 | 0        | 0.153027 | -5.55169 | -1.76572 | 3.785972 | 0.236207 | 0.366006 | 0.265342 |
| LA16c-306E5.3__prc  | 5.50997  | 4.36011  | 3.22778  | 4.65186  | 7.12952  | 5.65768  | 3.15142  | 4.95488  | 7.45136  | -0.41299 | -0.24829 | 0.164697 | 0.337443 | 0.70862  | 0.65985  |
| LA16c-349E10.1__ai  | 0.585119 | 0        | 1.11987  | 1.44621  | 0        | 0        | 0.80467  | 0        | 0        | 0.237485 | 1.083293 | 0.845808 | 0.894237 | 0.544511 | 0.42265  |
| LA16c-366D3.1__an   | 0        | 2.18745  | 0        | 14.7955  | 2.57862  | 14.8614  | 0        | 0        | 0        | -3.88133 | #DIV/0!  | #DIV/0!  | 0.17288  | 0.42265  | 0.119147 |
| LA16c-380H5.5__linc | 0.521766 | 0.830983 | 1.91857  | 0        | 0.481726 | 0        | 0.699267 | 0.781637 | 0.625476 | 2.763588 | 0.635107 | -2.12848 | 0.202172 | 0.485069 | 0.04768  |
| LA16c-444G7.1__linc | 5.42803  | 2.73681  | 1.57069  | 5.25563  | 4.55845  | 24.048   | 2.03318  | 0        | 0.391849 | -1.79834 | 2.005258 | 3.803597 | 0.382331 | 0.065627 | 0.25326  |
| LA16c-444G7.2__linc | 0        | 0        | 0.754636 | 0        | 0        | 1.04169  | 1.00276  | 0        | 0        | -0.46507 | -0.41012 | 0.05495  | 0.42265  | 0.885852 | 0.984455 |
| LA16c-4G1.3__lincR  | 0        | 0        | 0.367    | 0        | 0.320143 | 0.177345 | 0.091893 | 0        | 0        | -0.43888 | 1.997758 | 2.43664  | 0.797536 | 0.580172 | 0.379421 |
| LAMTOR5-AS1__an     | 26.6047  | 12.7187  | 13.7711  | 5.67829  | 8.58613  | 17.5893  | 13.8162  | 7.37528  | 11.1711  | 0.737101 | 0.714236 | -0.02286 | 0.434075 | 0.151196 | 0.971845 |
| LARGE-AS1__proce    | 0        | 0        | 0.087397 | 0.077311 | 7.43333  | 79.1978  | 0.085217 | 0        | 0        | -9.95437 | 0.036449 | 9.990821 | 0.370609 | 0.989687 | 0.371282 |
| LBX1-AS1__antisens  | 0.05375  | 0.173165 | 2.11527  | 5.70419  | 820.802  | 79.538   | 0.778004 | 0.146893 | 2.01096  | -8.59558 | -0.32593 | 8.269656 | 0.36703  | 0.53188  | 0.36747  |
| LDHAL6CP__pseudoc   | 0        | 0        | 0        | 0        | 2.30331  | 0        | 0        | 0        | 0        | #NUM!    | #DIV/0!  | #DIV/0!  | 0.42265  | #DIV/0!  | 0.42265  |
| LDLRAD4-AS1__ant    | 0        | 0        | 4.85396  | 4.5163   | 13.2645  | 5.18052  | 0.19098  | 3.24926  | 8.80043  | -2.24197 | -1.33445 | 0.907523 | 0.254122 | 0.166321 | 0.461506 |
| LEF1-AS1__process   | 0        | 0        | 0.622148 | 5.47887  | 5.96595  | 37.6883  | 1.84129  | 0        | 0        | -6.30329 | -1.56539 | 4.737907 | 0.261804 | 0.637844 | 0.287672 |
| LEMD1-AS1__antise   | 1.95839  | 2.0167   | 0.318138 | 16.0892  | 4.72369  | 11.5497  | 1.00556  | 0        | 0.034615 | -2.91419 | 2.045236 | 4.959429 | 0.112132 | 0.164676 | 0.075258 |
| LENG8-AS1__antise   | 1.91924  | 1.03668  | 4.85073  | 3.40871  | 4.50433  | 4.58814  | 2.36047  | 3.19432  | 3.81677  | -0.67929 | -0.26359 | 0.415703 | 0.283559 | 0.628637 | 0.021508 |
| LEPREL1-AS1__ant    | 0.011293 | 0.007777 | 0.249037 | 0        | 3.32246  | 2.48342  | 0.519761 | 0        | 0.339224 | -4.43664 | -1.67983 | 2.75681  | 0.200184 | 0.339462 | 0.283881 |
| LEPREL2__polymor    | 0.526439 | 0.485939 | 0.56558  | 0.897584 | 7.01056  | 14.7858  | 0.253912 | 0.661481 | 0.693535 | -3.84618 | -0.02804 | 3.818136 | 0.221003 | 0.948694 | 0.213087 |
| LGALS8-AS1__antis   | 0        | 0        | 0        | 0        | 0        | 0        | 0        | 0        | 0        | #DIV/0!  | #DIV/0!  | #DIV/0!  | #DIV/0!  | #DIV/0!  | #DIV/0!  |
| LIFR-AS1__antisens  | 6.76391  | 0.215174 | 1.90142  | 0.38938  | 457.845  | 41.1977  | 10.8601  | 1.06912  | 0.346332 | -5.8135  | -0.46707 | 5.346429 | 0.383444 | 0.560891 | 0.386857 |
| LIMD1-AS1__antiser  | 0.456393 | 0        | 0        | 1.7213   | 0        | 3.23948  | 0.925117 | 0        | 0        | -3.44222 | -1.01936 | 2.422859 | 0.252199 | 0.42265  | 0.301538 |
| LINC-ROR__lincRN    | 0.057057 | 0        | 0.108557 | 0        | 9.53666  | 37.3733  | 0.103952 | 0        | 0.062159 | -8.14593 | -0.00433 | 8.141602 | 0.298392 | 0.995648 | 0.29922  |
| LINC00029__lincRN   | 0        | 0        | 0        | 0        | 0        | 0        | 0.37021  | 0        | 0.170361 | #DIV/0!  | #NUM!    | #NUM!    | #DIV/0!  | 0.234164 | 0.234164 |
| LINC00052__lincRN   | 0        | 0        | 0.119133 | 0        | 0.726283 | 2.32294  | 0.099973 | 0        | 0        | -4.6778  | 0.252966 | 4.930762 | 0.270949 | 0.928871 | 0.300972 |
| LINC00085__proces   | 0.043113 | 2.29173  | 0        | 0        | 2.55776  | 2.9173   | 1.28727  | 1.07113  | 0.280764 | -1.22955 | -0.17676 | 1.052794 | 0.381168 | 0.900476 | 0.502209 |
| LINC00111__lincRN   | 0        | 0        | 1.60818  | 0        | 2.60711  | 30.9801  | 0        | 0        | 0        | -4.38441 | #DIV/0!  | #DIV/0!  | 0.373865 | 0.42265  | 0.376268 |
| LINC00113__lincRN   | 0        | 0        | 0.616813 | 0        | 0        | 6.11224  | 0        | 0        | 0        | -3.3088  | #DIV/0!  | #DIV/0!  | 0.42265  | 0.42265  | 0.42265  |
| LINC00116__lincRN   | 13.3788  | 7.34424  | 5.36607  | 5.09914  | 6.00603  | 370.709  | 4.36059  | 12.9924  | 12.1881  | -3.87135 | -0.17928 | 3.692076 | 0.437997 | 0.842326 | 0.43282  |
| LINC00152__lincRN   | 6.61801  | 8.18503  | 1.98479  | 78.2277  | 148.83   | 385.457  | 3.07974  | 3.10124  | 25.8063  | -5.18926 | -0.93008 | 4.259174 | 0.170583 | 0.643473 | 0.152039 |
| LINC00158__lincRN   | 0.045179 | 0.079927 | 0.233695 | 0        | 3.19474  | 1.94683  | 0.211331 | 0.018758 | 0.253064 | -3.84096 | -0.4293  | 3.411656 | 0.223282 | 0.596906 | 0.254067 |
| LINC00159__lincRN   | 0        | 0        | 1.20799  | 0        | 0.818311 | 62.8934  | 0        | 0        | 0        | -5.72088 | #DIV/0!  | #DIV/0!  | 0.415042 | 0.42265  | 0.415187 |

|                    |          |          |          |          |          |          |          |          |          |          |          |          |          |          |          |
|--------------------|----------|----------|----------|----------|----------|----------|----------|----------|----------|----------|----------|----------|----------|----------|----------|
| LINC00160__lincRN, | 0        | 0        | 2.59861  | 0        | 1.99167  | 2.57855  | 0        | 0        | 0        | -0.81452 | #DIV/0!  | #DIV/0!  | 0.428494 | 0.42265  | 0.190153 |
| LINC00162__lincRN, | 0        | 0        | 0.725015 | 0        | 5.36019  | 11.0783  | 1.40286  | 0        | 0.310372 | -4.50292 | -1.24064 | 3.262285 | 0.221844 | 0.609977 | 0.297956 |
| LINC00163__lincRN, | 0        | 0.04917  | 0.122972 | 0.129262 | 0.327131 | 1.19653  | 0.040884 | 0        | 0.030266 | -3.26335 | 1.274664 | 4.538012 | 0.234255 | 0.482265 | 0.248052 |
| LINC00173__proces  | 0.058776 | 0        | 0.443995 | 0        | 0        | 2.61953  | 0        | 0        | 0        | -2.38134 | #DIV/0!  | #DIV/0!  | 0.438453 | 0.351875 | 0.42265  |
| LINC00176__lincRN, | 0.132902 | 2.64256  | 0.177123 | 0.404653 | 1.99947  | 7.28353  | 0.191846 | 0.092655 | 1.04935  | -1.71417 | 1.146381 | 2.86055  | 0.45544  | 0.653296 | 0.260577 |
| LINC00184__lincRN, | 0.03426  | 0.072724 | 0.262772 | 0.154907 | 0        | 0.161523 | 0.274141 | 0        | 0        | 0.224687 | 0.431655 | 0.206968 | 0.82253  | 0.847989 | 0.878387 |
| LINC00200__lincRN, | 0        | 0        | 0.061047 | 0        | 2.96069  | 2.39559  | 0.083722 | 0.026666 | 0        | -6.45516 | -0.85458 | 5.600587 | 0.189153 | 0.733749 | 0.200595 |
| LINC00202-1__lincR | 0.088369 | 0.07578  | 0.11266  | 0.171103 | 0.395958 | 0.154201 | 0.425324 | 0.035165 | 0        | -1.38164 | -0.73428 | 0.647357 | 0.230093 | 0.703448 | 0.677968 |
| LINC00207__lincRN, | 0        | 0        | 0        | 0        | 19.6386  | 1.41017  | 0        | 0        | 0        | #NUM!    | #DIV/0!  | #DIV/0!  | 0.382782 | #DIV/0!  | 0.382782 |
| LINC00210__lincRN, | 0        | 0        | 0        | 0.154077 | 21.2284  | 370.709  | 0.018963 | 0.021142 | 0        | #NUM!    | #NUM!    | 13.25511 | 0.390347 | 0.184706 | 0.390407 |
| LINC00211__lincRN, | 0        | 0.074355 | 2.36238  | 3.238    | 2.87155  | 142.556  | 0.629467 | 0        | 0        | -5.93098 | 1.952747 | 7.883724 | 0.398076 | 0.573404 | 0.400677 |
| LINC00221__lincRN, | 0        | 0.041186 | 0.139806 | 3.54847  | 386.031  | 6.30801  | 0.119759 | 0        | 0.037995 | -11.0949 | 0.198254 | 11.2932  | 0.408216 | 0.917432 | 0.408246 |
| LINC00226__lincRN, | 0        | 0        | 0        | 0        | 0.259786 | 0.463748 | 0.120112 | 0        | 0        | #NUM!    | #NUM!    | 2.590681 | 0.214131 | 0.42265  | 0.360709 |
| LINC00229__lincRN, | 0        | 0        | 0.999886 | 0        | 2.3493   | 5.62718  | 0.399011 | 0        | 0        | -2.99592 | 1.325335 | 4.321252 | 0.223831 | 0.677756 | 0.284095 |
| LINC00237__lincRN, | 0        | 0        | 0.991044 | 0        | 1.52487  | 28.6779  | 0.99263  | 0        | 0        | -4.92959 | -0.00231 | 4.927281 | 0.391774 | 0.999347 | 0.413115 |
| LINC00238__proces  | 1.40639  | 1.36666  | 4.69144  | 1.43998  | 730.118  | 0        | 2.35174  | 1.36863  | 8.4028   | -6.61478 | -0.69965 | 5.915133 | 0.426352 | 0.297707 | 0.430068 |
| LINC00261__lincRN, | 0        | 0.374018 | 1.3315   | 2.17118  | 2.87179  | 18.1322  | 0.842932 | 8.62392  | 0.306848 | -3.7643  | -2.51869 | 1.245603 | 0.276114 | 0.442531 | 0.587946 |
| LINC00266-1__proce | 0.337934 | 0.410358 | 0.843962 | 0.433861 | 1.71013  | 1.13258  | 0.289989 | 0.427203 | 0.370476 | -1.04112 | 0.549832 | 1.590949 | 0.271515 | 0.388241 | 0.157004 |
| LINC00272__lincRN, | 0        | 0.166341 | 0.234478 | 0        | 3.93309  | 1.93188  | 0.183001 | 0        | 0.152344 | -3.8711  | 0.257305 | 4.128406 | 0.236427 | 0.854936 | 0.261128 |
| LINC00273__lincRN, | 0        | 0        | 0        | 0        | 0        | 5.49815  | 0        | 0        | 0        | #NUM!    | #DIV/0!  | #DIV/0!  | 0.42265  | #DIV/0!  | 0.42265  |
| LINC00276__lincRN, | 0.016632 | 0.049027 | 2.02659  | 19.9059  | 19.8966  | 323.286  | 0.917571 | 0.027299 | 0.063442 | -7.43912 | 1.053112 | 8.492235 | 0.353704 | 0.710289 | 0.355566 |
| LINC00277__lincRN, | 0        | 0.036425 | 0.265317 | 0.24302  | 2.35237  | 17.4485  | 0.186175 | 0.08343  | 0.090451 | -6.0537  | -0.25491 | 5.798796 | 0.342678 | 0.870363 | 0.350817 |
| LINC00284__lincRN, | 0.046174 | 0        | 0.539436 | 37.1319  | 31.7008  | 44.9238  | 2.4225   | 0.073576 | 2.36338  | -7.60179 | -3.05278 | 4.54901  | 0.009359 | 0.176542 | 0.007944 |
| LINC00290__lincRN, | 0        | 0        | 0        | 0        | 10.8527  | 5.72342  | 0        | 0        | 0.097242 | #NUM!    | #NUM!    | 7.413314 | 0.219993 | 0.42265  | 0.221711 |
| LINC00297__lincRN, | 0        | 0        | 0.108795 | 0.095757 | 9.58036  | 0        | 0.856312 | 0        | 0        | -6.47474 | -2.97652 | 3.49822  | 0.423501 | 0.500022 | 0.470151 |
| LINC00299__lincRN, | 0.965157 | 1.13609  | 0.903123 | 6.67753  | 10.1038  | 35.4981  | 1.28429  | 1.57486  | 1.41757  | -4.12111 | -0.50944 | 3.611667 | 0.213944 | 0.017501 | 0.22026  |
| LINC00301__lincRN, | 0        | 0        | 0        | 0        | 9.26782  | 2.93831  | 0        | 0        | 0        | #NUM!    | #DIV/0!  | #DIV/0!  | 0.275161 | #DIV/0!  | 0.275161 |
| LINC00302__lincRN, | 0        | 0        | 0        | 5.17831  | 0        | 50.8279  | 0        | 0        | 0        | #NUM!    | #DIV/0!  | #DIV/0!  | 0.367106 | #DIV/0!  | 0.367106 |
| LINC00303__lincRN, | 0        | 0        | 0.367031 | 2.26703  | 1.70282  | 15.6394  | 0.42241  | 0        | 0.264209 | -5.73949 | -0.90361 | 4.835881 | 0.284796 | 0.57558  | 0.298727 |
| LINC00304__lincRN, | 0        | 0.141185 | 0.615306 | 0        | 6.43972  | 0.063684 | 0.065226 | 0.087256 | 0.043459 | -3.1038  | 1.948897 | 5.052697 | 0.475222 | 0.440154 | 0.426773 |
| LINC00305__lincRN, | 0        | 0        | 0.962394 | 0        | 27.0844  | 66.378   | 0.037555 | 0        | 0.04169  | -6.60161 | 3.602243 | 10.20386 | 0.245703 | 0.44666  | 0.247551 |
| LINC00307__lincRN, | 0        | 0        | 0        | 0        | 0        | 1.64798  | 0        | 0.214226 | 0        | #NUM!    | #NUM!    | 2.943493 | 0.42265  | 0.42265  | 0.501892 |
| LINC00308__lincRN, | 0        | 0        | 0.143573 | 0        | 1.07746  | 10.2504  | 0.2801   | 0        | 0        | -6.30195 | -0.96416 | 5.33779  | 0.3647   | 0.749569 | 0.381377 |
| LINC00313__lincRN, | 0        | 0        | 0        | 0.78419  | 49.9894  | 3.55957  | 0.613214 | 0        | 0        | #NUM!    | #NUM!    | 6.469299 | 0.374143 | 0.42265  | 0.381135 |
| LINC00314__lincRN, | 0        | 0        | 0        | 0        | 2.03758  | 2.50638  | 0.246698 | 0        | 0        | #NUM!    | #NUM!    | 4.203132 | 0.187814 | 0.42265  | 0.23414  |



|                    |          |          |          |          |          |         |          |          |          |          |          |          |          |          |          |
|--------------------|----------|----------|----------|----------|----------|---------|----------|----------|----------|----------|----------|----------|----------|----------|----------|
| LINC00315__lincRN, | 0        | 0        | 0        | 0        | 0        | 4.77704 | 0        | 0        | 0        | #NUM!    | #DIV/0!  | #DIV/0!  | 0.42265  | #DIV/0!  | 0.42265  |
| LINC00316__lincRN, | 0        | 0        | 0        | 0        | 4.52467  | 67.7388 | 0        | 0        | 0.192035 | #NUM!    | #NUM!    | 8.555753 | 0.385455 | 0.42265  | 0.385353 |
| LINC00317__lincRN, | 0        | 0        | 0        | 0        | 3.59409  | 48.3233 | 0        | 0        | 0.064261 | #NUM!    | #NUM!    | 9.65807  | 0.381417 | 0.42265  | 0.381365 |
| LINC00319__lincRN, | 0.378504 | 0        | 0        | 2.03562  | 0        | 0       | 0        | 0        | -2.42709 | #DIV/0!  | #DIV/0!  | 0.42265  | 0.42265  | 0.42265  |          |
| LINC00322__lincRN, | 0        | 0        | 0.250866 | 0.330146 | 0        | 2.16545 | 0        | 0        | 0        | -3.3144  | #DIV/0!  | #DIV/0!  | 0.332938 | 0.42265  | 0.342227 |
| LINC00323__antisen | 0.029784 | 0.017562 | 0.104352 | 0        | 8.20314  | 6.58754 | 0.043796 | 0        | 0        | -6.60735 | 1.79234  | 8.399687 | 0.190597 | 0.416381 | 0.190742 |
| LINC00327__lincRN, | 0.143784 | 0.275966 | 0.302273 | 0        | 2.13763  | 3.13272 | 0.633802 | 0.289622 | 0.156535 | -2.86778 | -0.58086 | 2.286922 | 0.225571 | 0.595915 | 0.320439 |
| LINC00330__lincRN, | 0        | 0.052211 | 0.348429 | 0        | 2.32665  | 4.33007 | 0.897004 | 0.048387 | 0.128526 | -4.05443 | -1.4225  | 2.631929 | 0.212306 | 0.579117 | 0.337183 |
| LINC00333__lincRN, | 0        | 0        | 0        | 0        | 0        | 0       | 0        | 0        | 0        | #DIV/0!  | #DIV/0!  | #DIV/0!  | #DIV/0!  | #DIV/0!  | #DIV/0!  |
| LINC00334__lincRN, | 0        | 0        | 1.19901  | 0.321783 | 1.6531   | 2.74897 | 0.079766 | 0.178083 | 0        | -1.97812 | 2.217246 | 4.195366 | 0.110862 | 0.552695 | 0.17597  |
| LINC00337__antisen | 0.126448 | 0.208947 | 0.181794 | 0.167372 | 2.04852  | 1.08368 | 0.251068 | 0.055163 | 0.260774 | -2.67352 | -0.13267 | 2.540845 | 0.216069 | 0.865042 | 0.268984 |
| LINC00338__proces  | 0        | 0        | 0        | 0        | 1.57271  | 16.6256 | 0        | 0        | 0        | #NUM!    | #DIV/0!  | #DIV/0!  | 0.370844 | #DIV/0!  | 0.370844 |
| LINC00339__lincRN, | 1.93042  | 0.62346  | 1.90814  | 0.567978 | 2.31944  | 3.11427 | 0.794907 | 0.920559 | 2.20178  | -0.42767 | 0.187857 | 0.615529 | 0.642633 | 0.740042 | 0.286008 |
| LINC00341__lincRN, | 0.510549 | 0.086003 | 0.239997 | 0.374193 | 0.412691 | 5.60507 | 0.040895 | 0.296315 | 0.204366 | -2.93374 | 0.627285 | 3.561021 | 0.403465 | 0.669844 | 0.37591  |
| LINC00342__lincRN, | 0        | 0        | 0        | 0        | 0        | 52.1068 | 0.868263 | 0        | 0        | #NUM!    | #NUM!    | 5.907196 | 0.42265  | 0.42265  | 0.432349 |
| LINC00343__proces  | 0        | 0.120624 | 0.20454  | 0.067678 | 11.15    | 56.4649 | 0.836038 | 0        | 0.027764 | -7.70147 | -1.40953 | 6.29194  | 0.321683 | 0.639647 | 0.329468 |
| LINC00345__lincRN, | 0        | 0        | 0        | 0        | 0        | 0       | 0        | 0        | 0        | #DIV/0!  | #DIV/0!  | #DIV/0!  | #DIV/0!  | #DIV/0!  | #DIV/0!  |
| LINC00347__lincRN, | 0        | 0        | 0.043271 | 0        | 3.70713  | 158.398 | 1.22148  | 0        | 0.047057 | -11.8712 | -4.87363 | 6.99762  | 0.409296 | 0.420863 | 0.413765 |
| LINC00348__lincRN, | 0        | 0        | 0        | 0        | 13.3016  | 39.0984 | 0.976701 | 0.0756   | 0        | #NUM!    | #NUM!    | 5.637947 | 0.267463 | 0.379816 | 0.281952 |
| LINC00349__lincRN, | 0        | 0        | 0.049994 | 0        | 0        | 0       | 0        | 0        | 0        | #DIV/0!  | #DIV/0!  | #DIV/0!  | 0.42265  | 0.42265  | #DIV/0!  |
| LINC00351__lincRN, | 0        | 0        | 0.885977 | 0.218102 | 33.3774  | 1709.79 | 0.824729 | 0        | 0.150281 | -10.9423 | -0.13815 | 10.80419 | 0.411412 | 0.953489 | 0.411695 |
| LINC00352__lincRN, | 0        | 0.484422 | 0.544952 | 0.71422  | 1.92351  | 8.71857 | 1.34709  | 0        | 0        | -3.46365 | -0.38808 | 3.075575 | 0.284244 | 0.880247 | 0.354368 |
| LINC00353__lincRN, | 0        | 0        | 0.051465 | 0        | 0.608348 | 2.5625  | 0.571037 | 0        | 0        | -5.94515 | -3.47193 | 2.473213 | 0.30294  | 0.476804 | 0.443025 |
| LINC00355__lincRN, | 0.048308 | 0.133927 | 0.096706 | 0.106893 | 0.257998 | 28.2325 | 1.37106  | 0        | 0.058413 | -6.67978 | -2.35745 | 4.322328 | 0.418909 | 0.500581 | 0.443851 |
| LINC00358__lincRN, | 0        | 0        | 0.14813  | 0        | 1.03578  | 8.71857 | 0.578797 | 0        | 0        | -6.04111 | -1.96619 | 4.074916 | 0.357549 | 0.583823 | 0.397938 |
| LINC00359__lincRN, | 2.05418  | 0.061152 | 0.79612  | 2.53707  | 78.2708  | 189.602 | 2.00094  | 1.71677  | 0        | -6.53727 | -0.35268 | 6.18459  | 0.244288 | 0.746719 | 0.246972 |
| LINC00362__lincRN, | 0        | 0        | 0        | 0        | 1.7133   | 1.32859 | 0        | 0        | 0        | #NUM!    | #DIV/0!  | #DIV/0!  | 0.189956 | #DIV/0!  | 0.189956 |
| LINC00365__lincRN, | 0.230488 | 0.380502 | 1.45758  | 0.214525 | 4.42225  | 6.43406 | 1.17576  | 0.302465 | 1.41867  | -2.42006 | -0.48587 | 1.934185 | 0.189294 | 0.496217 | 0.280749 |
| LINC00371__lincRN, | 0.007384 | 0.119987 | 0.202874 | 0.078647 | 31.5562  | 317.01  | 2.28271  | 0        | 0.065618 | -10.044  | -2.83003 | 7.21398  | 0.368333 | 0.489559 | 0.3723   |
| LINC00374__lincRN, | 0        | 0        | 0        | 0        | 0        | 0       | 1.35049  | 0        | 0        | #DIV/0!  | #NUM!    | #NUM!    | #DIV/0!  | 0.42265  | 0.42265  |
| LINC00376__lincRN, | 0        | 0        | 0.524234 | 0        | 1.88419  | 4.94154 | 1.03388  | 0        | 0        | -3.7027  | -0.97979 | 2.722915 | 0.242422 | 0.746165 | 0.379454 |
| LINC00380__lincRN, | 0        | 0        | 0        | 0        | 0        | 0       | 0.637663 | 0        | 0        | #DIV/0!  | #NUM!    | #NUM!    | #DIV/0!  | 0.42265  | 0.42265  |
| LINC00381__antisen | 0        | 0.04523  | 0.089608 | 0.033986 | 0        | 3.30569 | 0.087773 | 0.013978 | 0.027849 | -4.63041 | 0.057162 | 4.687569 | 0.424757 | 0.972945 | 0.434667 |
| LINC00383__lincRN, | 0        | 0        | 0        | 0        | 11.6333  | 3.41738 | 1.02997  | 0        | 0        | #NUM!    | #NUM!    | 3.869154 | 0.283331 | 0.42265  | 0.334771 |
| LINC00384__lincRN, | 0        | 0.039267 | 0.183553 | 0.13317  | 0.298965 | 2.0591  | 0.923497 | 0.036473 | 0.131743 | -3.48291 | -2.29264 | 1.190267 | 0.310017 | 0.457642 | 0.615154 |

|                    |          |          |          |          |          |          |          |          |          |          |          |          |          |          |          |
|--------------------|----------|----------|----------|----------|----------|----------|----------|----------|----------|----------|----------|----------|----------|----------|----------|
| LINC00387__lincRN, | 0        | 0        | 0        | 0        | 0        | 1.44767  | 0        | 0        | 0        | #NUM!    | #DIV/0!  | #DIV/0!  | 0.42265  | #DIV/0!  | 0.42265  |
| LINC00388__lincRN, | 0        | 0.339922 | 0.870717 | 0        | 7.82756  | 1.03454  | 0.859974 | 0        | 0.116053 | -2.87188 | 0.310776 | 3.182656 | 0.410159 | 0.886515 | 0.425706 |
| LINC00391__lincRN, | 0        | 0.038739 | 0.164394 | 0.065412 | 1.76458  | 1.90257  | 0.656896 | 0.017945 | 0        | -4.19967 | -1.73212 | 2.467548 | 0.168387 | 0.598006 | 0.333719 |
| LINC00393__lincRN, | 0.532889 | 1.90624  | 2.30951  | 67.4265  | 134.877  | 360.244  | 3.03563  | 1.83584  | 41.1001  | -6.88832 | -3.27516 | 3.613161 | 0.169238 | 0.387721 | 0.15201  |
| LINC00395__antisen | 0.089249 | 0.14909  | 0.217847 | 0        | 2.96645  | 34.4135  | 0.50347  | 0        | 0.085081 | -6.3565  | -0.36755 | 5.988953 | 0.378696 | 0.833802 | 0.38359  |
| LINC00397__lincRN, | 0        | 0        | 0        | 0        | 0        | 0        | 0        | 3.16763  | 0        | #DIV/0!  | #NUM!    | #NUM!    | #DIV/0!  | 0.42265  | 0.42265  |
| LINC00398__lincRN, | 0.183179 | 0        | 0.182984 | 0.048313 | 1.73251  | 58.5578  | 1.1588   | 0        | 0.238097 | -7.36445 | -1.93167 | 5.432784 | 0.407111 | 0.391006 | 0.416855 |
| LINC00399__lincRN, | 0        | 0.998432 | 0.4102   | 0        | 0        | 0.475168 | 0.993934 | 0        | 0        | 1.567785 | 0.503073 | -1.06471 | 0.461357 | 0.836828 | 0.728133 |
| LINC00400__lincRN, | 0        | 0        | 0        | 0.632517 | 0        | 4.06134  | 0.335495 | 0        | 0.223368 | #NUM!    | #NUM!    | 3.070207 | 0.340681 | 0.199457 | 0.379823 |
| LINC00401__lincRN, | 0        | 0        | 0.082343 | 0        | 0        | 0        | 0.160772 | 0.044831 | 0        | #DIV/0!  | -1.32015 | #NUM!    | 0.42265  | 0.617627 | 0.288789 |
| LINC00403__lincRN, | 0        | 0        | 0        | 0        | 0        | 0        | 0.592784 | 3.60254  | 0        | #DIV/0!  | #NUM!    | #NUM!    | #DIV/0!  | 0.33657  | 0.33657  |
| LINC00407__lincRN, | 0        | 0        | 0.316181 | 10.2347  | 2.86236  | 17.0735  | 2.03952  | 0        | 0        | -6.57625 | -2.68941 | 3.88684  | 0.131365 | 0.517913 | 0.152039 |
| LINC00410__lincRN, | 0        | 0        | 0.27602  | 0        | 30.4511  | 1.87434  | 0.83399  | 0        | 0        | -6.87175 | -1.59526 | 5.276496 | 0.393181 | 0.633294 | 0.404275 |
| LINC00415__lincRN, | 0        | 0        | 0        | 0        | 0        | 5.28648  | 0.184749 | 0        | 0        | #NUM!    | #NUM!    | 4.838669 | 0.42265  | 0.42265  | 0.443167 |
| LINC00421__lincRN, | 0        | 0.289509 | 0        | 0.12161  | 0        | 0.687895 | 0.059946 | 0.033425 | 0        | -1.48343 | 1.632576 | 3.116007 | 0.602977 | 0.569438 | 0.402048 |
| LINC00426__lincRN, | 2.79203  | 0.200476 | 1.53241  | 0        | 4.98103  | 145.198  | 1.7222   | 0.390022 | 1.26839  | -5.05265 | 0.420607 | 5.473255 | 0.415093 | 0.409124 | 0.411483 |
| LINC00427__lincRN, | 0        | 0        | 0        | 0        | 0        | 8.92307  | 1.50005  | 0        | 0        | #NUM!    | #NUM!    | 2.57253  | 0.42265  | 0.42265  | 0.526354 |
| LINC00430__lincRN, | 0        | 0        | 0        | 0        | 0.183814 | 13.5448  | 0        | 0        | 0.192081 | #NUM!    | #NUM!    | 6.159327 | 0.414868 | 0.42265  | 0.414757 |
| LINC00434__lincRN, | 0        | 0        | 0        | 0        | 0        | 0.933844 | 0        | 0        | 0.324863 | #NUM!    | #NUM!    | 1.52335  | 0.42265  | 0.42265  | 0.42265  |
| LINC00440__lincRN, | 0        | 0        | 0.094424 | 0        | 0.299581 | 1.33112  | 0.276343 | 0        | 0        | -4.1102  | -1.54924 | 2.56096  | 0.302951 | 0.640341 | 0.43831  |
| LINC00448__lincRN, | 0.043211 | 0        | 1.54792  | 0        | 56.1082  | 899.74   | 1.20015  | 0        | 0.140207 | -9.23058 | 0.247436 | 9.47802  | 0.387805 | 0.920541 | 0.388599 |
| LINC00452__lincRN, | 0        | 0        | 0.10719  | 0        | 3.65506  | 94.1361  | 2.77365  | 0.032916 | 0.115997 | -9.83339 | -4.76899 | 5.064398 | 0.40066  | 0.414009 | 0.418124 |
| LINC00454__lincRN, | 0        | 0        | 0        | 0        | 3.45641  | 20.3347  | 0        | 0        | 0        | #NUM!    | #DIV/0!  | #DIV/0!  | 0.334066 | #DIV/0!  | 0.334066 |
| LINC00456__lincRN, | 0.900037 | 1.09466  | 0.715    | 1.93829  | 0.941868 | 4.77042  | 9.85747  | 0        | 7.93766  | -1.49744 | -2.71528 | -1.21784 | 0.319022 | 0.246483 | 0.317443 |
| LINC00457__lincRN, | 0        | 3.92516  | 1.38011  | 0        | 26.8237  | 237.085  | 2.41716  | 0        | 0.511162 | -5.63647 | 0.857352 | 6.493821 | 0.369529 | 0.707449 | 0.367174 |
| LINC00461__lincRN, | 0        | 0.030516 | 1.23299  | 6.47575  | 5.97945  | 105.531  | 0.829519 | 0.079721 | 0.084628 | -6.54504 | 0.346307 | 6.891349 | 0.356156 | 0.890175 | 0.361344 |
| LINC00462__lincRN, | 0        | 0        | 0        | 0        | 0        | 0        | 0.366827 | 0        | 0        | #DIV/0!  | #NUM!    | #NUM!    | #DIV/0!  | 0.42265  | 0.42265  |
| LINC00466__lincRN, | 0        | 0        | 1.17623  | 2.87363  | 3.03534  | 133.859  | 0.545877 | 0        | 0        | -6.89272 | 1.107522 | 8.000242 | 0.397237 | 0.719344 | 0.399763 |
| LINC00467__proces  | 8.99137  | 4.19717  | 1.38256  | 4.00287  | 7.91479  | 17.4485  | 0        | 4.53159  | 6.45623  | -1.01104 | 0.407205 | 1.418249 | 0.504197 | 0.799719 | 0.128682 |
| LINC00469__lincRN, | 0        | 0.042396 | 0.252002 | 0.063729 | 15.2586  | 109.907  | 1.42299  | 0.013105 | 0        | -8.73259 | -2.28631 | 6.446278 | 0.348442 | 0.54397  | 0.35592  |
| LINC00470__lincRN, | 2.53563  | 0        | 31.2328  | 60.0225  | 28.3415  | 52.1068  | 0.139281 | 27.8564  | 2.65444  | -2.05652 | 0.139782 | 2.196306 | 0.08608  | 0.954969 | 0.183604 |
| LINC00477__lincRN, | 0.03566  | 0.021027 | 0.321181 | 0.189267 | 1.05913  | 0.880547 | 0.13974  | 0        | 0.135772 | -2.49418 | 0.455768 | 2.949951 | 0.149846 | 0.723416 | 0.174145 |
| LINC00478__lincRN, | 17.0692  | 0.577176 | 2.30616  | 1.87736  | 820.802  | 317.673  | 1.11759  | 0.149081 | 2.38712  | -5.83676 | 2.449106 | 8.28587  | 0.264004 | 0.410305 | 0.253501 |
| LINC00479__lincRN, | 0.029563 | 0        | 0.509938 | 0.411485 | 1.11917  | 1.03244  | 0.282184 | 0.266884 | 0.048274 | -2.24819 | -0.14693 | 2.101259 | 0.096308 | 0.943406 | 0.132528 |
| LINC00485__lincRN, | 0        | 0.004605 | 0.0639   | 0.041594 | 0.064032 | 0.078226 | 0.076688 | 0.043596 | 0.017459 | -1.42426 | -1.00769 | 0.416569 | 0.099308 | 0.591121 | 0.635764 |

|                    |          |          |          |          |          |          |          |          |          |          |          |          |          |          |          |
|--------------------|----------|----------|----------|----------|----------|----------|----------|----------|----------|----------|----------|----------|----------|----------|----------|
| LINC00487__lincRN, | 0        | 0        | 2.03243  | 3.33062  | 3.24908  | 13.0907  | 0.452047 | 0        | 0.122463 | -3.27475 | 1.822802 | 5.09755  | 0.151201 | 0.571144 | 0.193809 |
| LINC00489__lincRN, | 0        | 0.247677 | 0        | 0        | 1962.19  | 1.95038  | 1.06317  | 0        | 0        | -12.9532 | -2.10184 | 10.85131 | 0.422076 | 0.568699 | 0.422389 |
| LINC00494__lincRN, | 0        | 0        | 0        | 5.29766  | 2.42602  | 0.908721 | 2.76589  | 0        | 0.147472 | #NUM!    | #NUM!    | 1.567077 | 0.154862 | 0.392729 | 0.079784 |
| LINC00500__lincRN, | 0.435483 | 0        | 0        | 1.19791  | 0        | 2.97692  | 0.068437 | 0        | 0        | -3.26103 | 2.669779 | 5.930808 | 0.297458 | 0.42265  | 0.25539  |
| LINC00504__lincRN, | 0.065295 | 0.281252 | 2.16339  | 0.147327 | 72.569   | 288.191  | 0.233716 | 0.038799 | 0.164737 | -7.16783 | 2.521116 | 9.688949 | 0.298623 | 0.40769  | 0.29931  |
| LINC00505__lincRN, | 0        | 0        | 0        | 0        | 3.01542  | 2.94862  | 0        | 0        | 0        | #NUM!    | #DIV/0!  | #DIV/0!  | 0.183555 | #DIV/0!  | 0.183555 |
| LINC00507__lincRN, | 0        | 0        | 0.180671 | 0.065078 | 0.261658 | 10.4223  | 0.120214 | 0        | 0.080084 | -5.8947  | -0.14879 | 5.745913 | 0.404437 | 0.927705 | 0.411317 |
| LINC00511__lincRN, | 8.77217  | 84.1348  | 6.29363  | 178.381  | 68.0842  | 192.632  | 41.8732  | 6.68879  | 59.8298  | -2.14612 | -0.12783 | 2.018285 | 0.222756 | 0.946827 | 0.045815 |
| LINC00514__lincRN, | 0.008616 | 0.07242  | 0.339151 | 0.068803 | 2.18144  | 4.08573  | 0.125731 | 0.103703 | 0.16142  | -3.91446 | 0.104402 | 4.018864 | 0.205669 | 0.921279 | 0.227067 |
| LINC00515__antisen | 0.947301 | 0.645995 | 0.271814 | 0.11814  | 37.5408  | 3.40796  | 1.29581  | 0.196361 | 0.292658 | -4.46064 | 0.063475 | 4.524118 | 0.388906 | 0.918579 | 0.395094 |
| LINC00517__antisen | 0.168423 | 0        | 0        | 0.022417 | 0.081196 | 248.682  | 0.106441 | 0.027644 | 0.00918  | -10.5286 | 0.233398 | 10.762   | 0.4228   | 0.787915 | 0.422721 |
| LINC00520__proces  | 0.193056 | 0.070737 | 0.60522  | 0.05975  | 1.85428  | 3.045    | 0.191102 | 0        | 0.17956  | -2.51261 | 1.229273 | 3.741882 | 0.219411 | 0.333206 | 0.224414 |
| LINC00521__proces  | 0        | 0.127661 | 0.592515 | 4.52965  | 0.598947 | 7.58021  | 0.394124 | 0.090887 | 0        | -4.14134 | 0.570331 | 4.711666 | 0.17014  | 0.809462 | 0.184102 |
| LINC00523__lincRN, | 0.107802 | 0        | 0.150982 | 0        | 3.52288  | 3.9002   | 0.092205 | 0.023532 | 0        | -4.8422  | 1.160903 | 6.003101 | 0.196173 | 0.46231  | 0.194983 |
| LINC00524__lincRN, | 0.563773 | 0        | 0.280671 | 1.37879  | 0        | 0.460338 | 0.273066 | 0        | 0        | -1.12295 | 1.628752 | 2.7517   | 0.311897 | 0.183629 | 0.245095 |
| LINC00539__lincRN, | 1.213    | 23.8211  | 2.00725  | 24.9982  | 55.8989  | 20.0257  | 2.71638  | 1.58362  | 1.43569  | -1.90001 | 2.237128 | 4.137141 | 0.026371 | 0.448284 | 0.107577 |
| LINC00543__lincRN, | 0.399149 | 3.22556  | 0.545207 | 1.38335  | 2.60048  | 6.23888  | 0.805747 | 2.40955  | 0        | -1.29369 | 0.375066 | 1.668754 | 0.398712 | 0.481165 | 0.35459  |
| LINC00544__lincRN, | 0        | 0        | 0        | 0        | 2.521    | 12.5533  | 0.758031 | 0        | 0        | #NUM!    | #NUM!    | 4.31369  | 0.320275 | 0.42265  | 0.355585 |
| LINC00551__lincRN, | 0.065747 | 0        | 0        | 0.058081 | 2.88844  | 85.3553  | 1.416    | 0        | 0.047637 | -10.3913 | -4.47649 | 5.914814 | 0.403505 | 0.402653 | 0.412702 |
| LINC00552__pseudc  | 0        | 0.05409  | 0.0689   | 0.15248  | 0.196335 | 0.384603 | 0.887463 | 0.025082 | 0        | -2.57611 | -2.89136 | -0.31526 | 0.068517 | 0.488158 | 0.877903 |
| LINC00554__antisen | 0        | 0        | 0.10749  | 0        | 0.135815 | 1.89164  | 0.172352 | 0        | 0        | -4.2374  | -0.68116 | 3.55624  | 0.380492 | 0.815639 | 0.437573 |
| LINC00555__antisen | 0        | 0.110558 | 0        | 0        | 34.4096  | 4.97192  | 0.09025  | 0        | 0        | -8.47657 | 0.292809 | 8.769381 | 0.345796 | 0.917844 | 0.34752  |
| LINC00556__antisen | 0        | 0        | 0        | 0        | 0        | 0        | 0        | 0        | 0        | #DIV/0!  | #DIV/0!  | #DIV/0!  | #DIV/0!  | #DIV/0!  | #DIV/0!  |
| LINC00557__lincRN, | 0        | 0        | 0        | 0.129704 | 0.208599 | 0.02333  | 0.119795 | 0        | 0        | #NUM!    | #NUM!    | 1.593959 | 0.153812 | 0.42265  | 0.33554  |
| LINC00558__lincRN, | 0        | 0        | 0.064849 | 0        | 0.069342 | 2.49083  | 2.45495  | 0        | 0.050408 | -5.30302 | -5.27179 | 0.031224 | 0.40639  | 0.426056 | 0.99086  |
| LINC00559__lincRN, | 0        | 0        | 0.082695 | 0.069941 | 3.33521  | 13.8453  | 1.24402  | 0        | 0.032732 | -7.70461 | -3.94853 | 3.756084 | 0.30007  | 0.446284 | 0.353173 |
| LINC00561__lincRN, | 0        | 0.050833 | 0.032378 | 0        | 0.207635 | 1.57469  | 0.084593 | 0        | 0        | -4.42085 | -0.02377 | 4.397073 | 0.367214 | 0.992315 | 0.383752 |
| LINC00563__lincRN, | 0.044459 | 0        | 0.066711 | 0        | 1.27071  | 25.4267  | 0.217572 | 0.097036 | 0.120789 | -7.90779 | -1.96956 | 5.938226 | 0.395492 | 0.08993  | 0.401502 |
| LINC00566__lincRN, | 0.792163 | 3.62114  | 0.437452 | 1.02744  | 2.23363  | 3.34984  | 1.61501  | 0.663843 | 2.62594  | -0.44664 | -0.01598 | 0.430657 | 0.685825 | 0.991724 | 0.460492 |
| LINC00571__lincRN, | 2.5554   | 1.69645  | 1.33988  | 155.255  | 3.53368  | 398.421  | 2.1313   | 3.51185  | 2.05638  | -6.63878 | -0.46148 | 6.177306 | 0.251407 | 0.390685 | 0.253355 |
| LINC00572__antisen | 0        | 0        | 0        | 0        | 26.465   | 13.9309  | 1.63051  | 0        | 0.278771 | #NUM!    | #NUM!    | 4.403108 | 0.220179 | 0.333609 | 0.254939 |
| LINC00575__lincRN, | 0        | 0.046848 | 0        | 2.19702  | 4.10157  | 2.98899  | 0        | 0        | 0        | -7.63119 | #DIV/0!  | #DIV/0!  | 0.0292   | 0.42265  | 0.030392 |
| LINC00578__lincRN, | 0        | 0        | 1.10218  | 11.3932  | 31.0887  | 579.152  | 11.5825  | 7.52641  | 4.0399   | -9.13956 | -4.39251 | 4.747055 | 0.381233 | 0.098668 | 0.399689 |
| LINC00582__antisen | 0        | 0        | 1.43207  | 0        | 14.305   | 112.843  | 1.26229  | 0.266884 | 0        | -6.47226 | -0.09465 | 6.377612 | 0.353824 | 0.970915 | 0.362239 |
| LINC00592__lincRN, | 0.061426 | 0.092381 | 0.78039  | 0        | 0        | 3.15367  | 0.534541 | 0        | 0        | -1.75523 | 0.805426 | 2.560659 | 0.460655 | 0.748447 | 0.527252 |

|                    |          |          |          |          |          |          |          |          |          |          |          |          |          |          |          |
|--------------------|----------|----------|----------|----------|----------|----------|----------|----------|----------|----------|----------|----------|----------|----------|----------|
| LINC00593__lincRN, | 0        | 0        | 0.585877 | 0        | 3.72795  | 17.4136  | 0.299701 | 0        | 0        | -5.17334 | 0.967074 | 6.140413 | 0.31144  | 0.748931 | 0.324392 |
| LINC00596__lincRN, | 0.104951 | 0.206345 | 0.616875 | 0        | 0.370955 | 2.49756  | 0.491918 | 0        | 0.189538 | -1.62784 | 0.44577  | 2.073612 | 0.407519 | 0.767376 | 0.471417 |
| LINC00601__lincRN, | 0.109059 | 0        | 0        | 0.036065 | 0.287069 | 0        | 0.053313 | 0        | 0        | -1.56703 | 1.032555 | 2.59958  | 0.582732 | 0.42265  | 0.458314 |
| LINC00603__lincRN, | 0        | 0        | 0.266004 | 0        | 0        | 0        | 0        | 0        | 0        | #DIV/0!  | #DIV/0!  | #DIV/0!  | 0.42265  | 0.42265  | #DIV/0!  |
| LINC00604__lincRN, | 0        | 0        | 1.00533  | 0        | 2.6254   | 3.31706  | 2.21839  | 0        | 0        | -2.56339 | -1.14184 | 1.421547 | 0.185146 | 0.712444 | 0.549879 |
| LINC00606__lincRN, | 0.010247 | 0        | 0.051313 | 0.109047 | 0.130551 | 0.442116 | 0.090499 | 0        | 0.136416 | -3.4691  | -1.88209 | 1.587018 | 0.154978 | 0.183855 | 0.211302 |
| LINC00607__lincRN, | 0.679723 | 0        | 1.34465  | 0.043613 | 42.5527  | 317.01   | 0.873475 | 0.013036 | 0.045507 | -7.4728  | 1.119045 | 8.591845 | 0.351848 | 0.519882 | 0.352483 |
| LINC00609__lincRN, | 0.196255 | 2.98935  | 2.83401  | 0.232068 | 7.62861  | 524.526  | 0.313316 | 8.0216   | 0.135641 | -6.46666 | -0.49279 | 5.973874 | 0.417499 | 0.752235 | 0.423172 |
| LINC00612__proces  | 0.789941 | 0.134221 | 0.167142 | 0.226435 | 19.4659  | 0.181143 | 0        | 1.26033  | 0        | -4.18672 | -0.20775 | 3.978971 | 0.439299 | 0.929574 | 0.409799 |
| LINC00613__lincRN, | 0        | 0        | 0        | 0        | 0.089821 | 2.12644  | 0        | 0        | 0        | #NUM!    | #DIV/0!  | #DIV/0!  | 0.398799 | #DIV/0!  | 0.398799 |
| LINC00615__lincRN, | 0        | 0        | 0.089445 | 0        | 0.154836 | 2.68811  | 0.118554 | 0.097577 | 0.072878 | -4.99024 | -1.69204 | 3.298203 | 0.389333 | 0.253949 | 0.436895 |
| LINC00616__lincRN, | 0        | 0        | 0        | 0        | 2.02356  | 25.9589  | 0        | 0        | 0        | #NUM!    | #DIV/0!  | #DIV/0!  | 0.379526 | #DIV/0!  | 0.379526 |
| LINC00617__lincRN, | 0.030069 | 0.023637 | 0.120457 | 0        | 3.91314  | 48.757   | 0.088522 | 0.043856 | 0        | -8.2404  | 0.39578  | 8.636182 | 0.378819 | 0.821836 | 0.379831 |
| LINC00619__lincRN, | 0.114304 | 0        | 0        | 0.075567 | 1.23274  | 20.3347  | 0.532966 | 0.031146 | 0.279086 | -7.56488 | -2.883   | 4.681886 | 0.38987  | 0.165224 | 0.402453 |
| LINC00620__antisen | 0        | 0        | 0.9099   | 0        | 43.9205  | 13.4916  | 2.70616  | 0        | 2.39193  | -5.9795  | -2.48618 | 3.493326 | 0.285978 | 0.216293 | 0.334462 |
| LINC00621__lincRN, | 0.055395 | 0.338676 | 0.367028 | 0.25467  | 77.2564  | 10.1344  | 0.928915 | 0.11635  | 0.152739 | -6.84745 | -0.65448 | 6.192975 | 0.353037 | 0.727739 | 0.358363 |
| LINC00626__lincRN, | 0        | 3.87569  | 0.825217 | 5.09016  | 15.3208  | 8.50397  | 0.781828 | 0.464644 | 0        | -2.6208  | 1.915089 | 4.535892 | 0.048483 | 0.445298 | 0.095026 |
| LINC00634__pseudc  | 0.0615   | 0.048354 | 0.164081 | 0.190241 | 2.02944  | 5.06835  | 0.180646 | 0.044758 | 0        | -4.73362 | 0.281323 | 5.014946 | 0.234605 | 0.861842 | 0.250865 |
| LINC00635__lincRN, | 0        | 0        | 0        | 0        | 41.0231  | 1.49966  | 0.78073  | 0        | 0.287983 | #NUM!    | #NUM!    | 5.314289 | 0.401943 | 0.258521 | 0.416944 |
| LINC00636__lincRN, | 0.072083 | 0        | 0.120156 | 0        | 14.2549  | 2.28079  | 0.164554 | 0.052423 | 0        | -6.42654 | -0.17465 | 6.251895 | 0.345543 | 0.910969 | 0.345057 |
| LINC00639__lincRN, | 0.170314 | 1.21269  | 0.231639 | 0.153971 | 8.03027  | 88.5815  | 0.162842 | 0.063274 | 0.042029 | -5.90521 | 2.59013  | 8.495339 | 0.380048 | 0.332688 | 0.373288 |
| LINC00640__lincRN, | 0.041426 | 0        | 0.836236 | 0.411864 | 1.58521  | 2.79234  | 0.331171 | 0        | 0.373528 | -2.44811 | 0.316658 | 2.76477  | 0.112554 | 0.817086 | 0.184851 |
| LINC00641__proces  | 0        | 0        | 0        | 1.48408  | 1.62443  | 398.421  | 0        | 0        | 1.08046  | #NUM!    | #NUM!    | 8.537717 | 0.418154 | 0.42265  | 0.418142 |
| LINC00642__lincRN, | 0.02596  | 0.163315 | 0.174259 | 0.319232 | 1.45493  | 0        | 0.150474 | 0        | 0.084769 | -2.28697 | 0.627937 | 2.914912 | 0.390356 | 0.669362 | 0.394401 |
| LINC00645__lincRN, | 0.050164 | 0.039433 | 0.050247 | 0        | 0        | 1.46424  | 0.090281 | 0        | 0.036459 | -3.38826 | 0.141949 | 3.530214 | 0.459783 | 0.869371 | 0.460235 |
| LINC00648__lincRN, | 0        | 0        | 0.071419 | 0.027103 | 1.94867  | 0.08791  | 0.019994 | 0.089149 | 0        | -4.85277 | -0.61184 | 4.240931 | 0.409812 | 0.812185 | 0.393829 |
| LINC00649__antisen | 55.6189  | 18.6562  | 26.2284  | 9.40858  | 21.4125  | 9.48135  | 19.0065  | 31.7888  | 55.4706  | 1.318307 | -0.08043 | -1.39874 | 0.293965 | 0.931633 | 0.208436 |
| LINC00652__lincRN, | 0.145868 | 0.981949 | 0.627115 | 0.380783 | 0.408847 | 2.01969  | 0.881864 | 0.521625 | 0.55205  | -0.67881 | -0.15615 | 0.522655 | 0.600584 | 0.867077 | 0.682986 |
| LINC00656__lincRN, | 0.047406 | 0.03727  | 0.158171 | 0.083926 | 3.32168  | 1.49166  | 0.466285 | 0        | 0.154782 | -4.33385 | -1.3547  | 2.979156 | 0.241962 | 0.480759 | 0.314389 |
| LINC00657__lincRN, | 101.793  | 129.08   | 71.977   | 54.7996  | 41.1081  | 25.009   | 42.3734  | 77.1336  | 82.951   | 1.32459  | 0.580981 | -0.74361 | 0.047199 | 0.27261  | 0.321162 |
| LINC00658__lincRN, | 0.217832 | 0.206504 | 5.5391   | 1.44512  | 10.781   | 16.036   | 1.12043  | 1.52427  | 1.03592  | -2.24465 | 0.696195 | 2.940849 | 0.138869 | 0.724159 | 0.194972 |
| LINC00662__lincRN, | 4.71603  | 2.89071  | 1.96199  | 10.3244  | 77.8625  | 1072.35  | 1.92468  | 2.8001   | 2.5582   | -6.92225 | 0.393799 | 7.316048 | 0.380712 | 0.537887 | 0.379152 |
| LINC00663__lincRN, | 1.62636  | 0.231755 | 1.05649  | 1.48457  | 58.8462  | 5.29533  | 0.060716 | 2.17332  | 1.79904  | -4.4929  | -0.46858 | 4.024317 | 0.383905 | 0.751861 | 0.373914 |
| LINC00664__lincRN, | 0.093025 | 0.081951 | 0.244468 | 0.157582 | 0.52908  | 123.931  | 0.16678  | 0.152125 | 0.088374 | -8.21481 | 0.042463 | 8.257277 | 0.420265 | 0.96231  | 0.420938 |
| LINC00665__lincRN, | 0.368047 | 2.86731  | 6.69484  | 0.95888  | 10.4237  | 6.49883  | 2.30263  | 1.54429  | 5.63469  | -0.84857 | 0.06669  | 0.915257 | 0.394534 | 0.899316 | 0.462466 |

|                    |          |          |          |          |          |          |          |          |          |          |          |          |          |          |          |
|--------------------|----------|----------|----------|----------|----------|----------|----------|----------|----------|----------|----------|----------|----------|----------|----------|
| LINC00667__lincRN, | 3.24871  | 1.78092  | 2.94485  | 3.46244  | 8.53995  | 1.0045   | 0.667445 | 3.38325  | 4.63256  | -0.70581 | -0.12285 | 0.582968 | 0.587015 | 0.882257 | 0.638058 |
| LINC00668__lincRN, | 1.5386   | 0.471285 | 1.7922   | 2.2597   | 5.37676  | 2.9722   | 0.615601 | 2.43955  | 5.22049  | -1.48038 | -1.12208 | 0.358299 | 0.228952 | 0.363755 | 0.667238 |
| LINC00669__lincRN, | 3.77263  | 1.23864  | 0.167713 | 21.5051  | 152.22   | 248.682  | 2.96546  | 34.3596  | 0.180234 | -6.34982 | -2.85635 | 3.493468 | 0.173129 | 0.436669 | 0.193848 |
| LINC00670__lincRN, | 0.309071 | 0.439229 | 0.045448 | 0.165963 | 2.74025  | 10.9583  | 0.654739 | 0        | 0.024723 | -4.12657 | 0.22429  | 4.350861 | 0.323418 | 0.882029 | 0.325282 |
| LINC00671__lincRN, | 0        | 0.01937  | 0.248013 | 0        | 7.47844  | 7.82739  | 0.824208 | 0.089722 | 0.131541 | -5.83903 | -1.96718 | 3.871856 | 0.18353  | 0.462235 | 0.230569 |
| LINC00676__antisen | 0        | 0        | 0.843004 | 0.219577 | 3.66629  | 0.940971 | 1.82293  | 0        | 0.181198 | -2.51747 | -1.24936 | 1.268104 | 0.373989 | 0.654329 | 0.599883 |
| LINC00677__lincRN, | 0        | 0        | 0.112211 | 0        | 0        | 10.7254  | 0.164028 | 0.061003 | 0.364087 | -6.57867 | -2.39234 | 4.186331 | 0.42265  | 0.102257 | 0.435269 |
| LINC00683__lincRN, | 0        | 0.050242 | 0.101417 | 0.114354 | 2.37433  | 22.4077  | 0.151024 | 0.0091   | 0.098594 | -7.35896 | -0.77054 | 6.588416 | 0.362992 | 0.605183 | 0.365942 |
| LINC00687__lincRN, | 0        | 0.383736 | 1.22794  | 0.648798 | 7.80557  | 95.6924  | 3.01837  | 0.058777 | 0        | -6.01391 | -0.93303 | 5.080881 | 0.375263 | 0.741632 | 0.39238  |
| LINC00690__lincRN, | 0        | 0        | 0        | 0.315377 | 0.179579 | 0        | 0.253002 | 0        | 0.064717 | #NUM!    | #NUM!    | 0.639551 | 0.212602 | 0.297582 | 0.490441 |
| LINC00691__lincRN, | 0        | 0.084216 | 0.247578 | 0.070779 | 0.264683 | 0.165735 | 0.862808 | 0.077996 | 0.075433 | -0.59509 | -1.61488 | -1.01979 | 0.535192 | 0.550867 | 0.636804 |
| LINC00693__antisen | 0.055473 | 0.324545 | 0.835731 | 0        | 14.9021  | 1554.35  | 1.09714  | 0.100969 | 0.136783 | -10.334  | -0.13488 | 10.19914 | 0.417278 | 0.946015 | 0.417586 |
| LINC00700__lincRN, | 0        | 0        | 0.014313 | 0.018993 | 3.01239  | 1.58181  | 0.042052 | 0        | 0        | -8.3323  | -1.55485 | 6.777444 | 0.218118 | 0.63947  | 0.224355 |
| LINC00702__lincRN, | 0.616395 | 0.745375 | 0.217884 | 0.078383 | 1.63978  | 16.9304  | 0.094928 | 0.046003 | 0.105428 | -3.56138 | 2.680777 | 6.242161 | 0.411484 | 0.124854 | 0.371341 |
| LINC00703__lincRN, | 0        | 0.003011 | 0.160821 | 0.049577 | 22.2062  | 15.261   | 0.164864 | 0.041886 | 0.125069 | -7.83918 | -1.01818 | 6.820994 | 0.19685  | 0.439758 | 0.200111 |
| LINC00704__lincRN, | 0.966346 | 4.84321  | 0.80566  | 0.147274 | 12.0927  | 25.7566  | 2.23777  | 0.647451 | 0.861049 | -2.52201 | 0.820333 | 3.342343 | 0.303037 | 0.622219 | 0.280408 |
| LINC00705__lincRN, | 1.7519   | 2.04225  | 1.07092  | 0        | 1.0909   | 1.87556  | 1.29385  | 1.7295   | 0        | 0.713718 | 0.686313 | -0.02741 | 0.490111 | 0.118327 | 0.98612  |
| LINC00707__lincRN, | 0        | 0        | 0        | 0        | 35.3643  | 929.368  | 6.35824  | 0        | 0        | #NUM!    | #NUM!    | 7.245357 | 0.401114 | 0.42265  | 0.405075 |
| LINC00708__lincRN, | 0        | 0        | 0.109077 | 0        | 2.38976  | 0        | 0        | 0        | 0        | -4.45345 | #DIV/0!  | #DIV/0!  | 0.449575 | 0.42265  | 0.42265  |
| LINC00709__lincRN, | 0        | 0        | 0        | 0        | 0        | 4.46154  | 0.07708  | 0        | 0        | #NUM!    | #NUM!    | 5.855049 | 0.42265  | 0.42265  | 0.432709 |
| LINC00710__proces  | 0        | 0.165783 | 1.42612  | 2.03749  | 10.4903  | 17.5893  | 0.082606 | 0        | 0        | -4.24176 | 4.268355 | 8.510113 | 0.146116 | 0.394066 | 0.157131 |
| LINC00838__lincRN, | 0        | 0        | 0.110149 | 2.3663   | 13.6958  | 0.178813 | 0.465275 | 0.010941 | 0.043597 | -7.20403 | -2.23854 | 4.965497 | 0.329939 | 0.496915 | 0.343083 |
| LINC00839__lincRN, | 0.167978 | 0.121441 | 0.456715 | 0.257593 | 4.48546  | 5.972    | 0.177409 | 0.144703 | 0.182937 | -3.84406 | 0.563011 | 4.407072 | 0.181701 | 0.493717 | 0.185375 |
| LINC00842__lincRN, | 2.5025   | 2.1635   | 5.36132  | 27.991   | 15.9802  | 274.644  | 2.39559  | 3.27738  | 1.07297  | -4.98981 | 0.571845 | 5.561652 | 0.34218  | 0.572534 | 0.345385 |
| LINC00843__lincRN, | 4.79877  | 15.4858  | 15.9313  | 10.2731  | 11.3304  | 140.437  | 7.07251  | 2.70787  | 106.05   | -2.16166 | -1.67732 | 0.484341 | 0.417421 | 0.495154 | 0.250489 |
| LINC00853__antisen | 0        | 0        | 0        | 0.489323 | 10.6376  | 0.596123 | 0        | 0.39716  | 0        | #NUM!    | #NUM!    | 4.883483 | 0.365403 | 0.42265  | 0.363256 |
| LINC00854__proces  | 1.44307  | 1.03634  | 1.57208  | 1.86557  | 4.4017   | 3.98102  | 1.01319  | 1.26124  | 3.2293   | -1.33886 | -0.44196 | 0.896902 | 0.140009 | 0.514441 | 0.179804 |
| LINC00856__lincRN, | 1.48879  | 0.012923 | 3.79525  | 0.116594 | 19.6018  | 53.9086  | 1.90003  | 0.202951 | 0.698745 | -3.797   | 0.918849 | 4.715847 | 0.26704  | 0.539658 | 0.278358 |
| LINC00857__lincRN, | 1.36361  | 0.204063 | 0.97019  | 1.10987  | 1.57139  | 0.823375 | 1.39836  | 0.882787 | 2.10783  | -0.46565 | -0.79027 | -0.32462 | 0.600854 | 0.193512 | 0.656334 |
| LINC00858__lincRN, | 0.27386  | 1.6724   | 1.97041  | 1.94201  | 3.69204  | 14.6577  | 0.840896 | 1.28185  | 1.39742  | -2.37319 | 0.153984 | 2.527178 | 0.270224 | 0.744437 | 0.283925 |
| LINC00864__lincRN, | 0.006641 | 0        | 0.159372 | 0        | 2.41126  | 2.56722  | 0.057147 | 0        | 0.142758 | -4.90634 | -0.26801 | 4.638322 | 0.18463  | 0.631973 | 0.193268 |
| LINC00866__lincRN, | 0.284317 | 1.39704  | 3.49276  | 6.90671  | 159.4    | 6.52091  | 1.59859  | 1.19403  | 0.785642 | -5.06188 | 0.532054 | 5.593931 | 0.388036 | 0.69452  | 0.383101 |
| LINC00868__lincRN, | 0        | 0        | 1.21283  | 4.04125  | 0.497395 | 4.18438  | 0.114544 | 0.085171 | 0        | -2.84645 | 2.60236  | 5.448811 | 0.139809 | 0.521027 | 0.144644 |
| LINC00877__lincRN, | 0.208069 | 0.16267  | 1.14058  | 0.961892 | 4.51897  | 46.167   | 1.17325  | 0.312983 | 0.651073 | -5.09483 | -0.49999 | 4.594843 | 0.360202 | 0.669218 | 0.374651 |
| LINC00879__lincRN, | 0        | 0        | 1.27775  | 0.099053 | 2.82801  | 33.5702  | 0.238605 | 0        | 0        | -4.83611 | 2.420909 | 7.25702  | 0.372721 | 0.538442 | 0.378619 |

|                    |          |          |          |          |          |          |          |          |          |          |          |          |          |          |          |
|--------------------|----------|----------|----------|----------|----------|----------|----------|----------|----------|----------|----------|----------|----------|----------|----------|
| LINC00881__lincRN, | 0        | 0.167384 | 0.854909 | 0        | 7.19383  | 0        | 1.32071  | 0        | 0.877925 | -2.81495 | -1.1048  | 1.710152 | 0.496608 | 0.489918 | 0.608504 |
| LINC00882__lincRN, | 0.847939 | 0        | 0.679536 | 3.04344  | 456.324  | 51.6202  | 0.765292 | 0        | 0.647161 | -8.386   | 0.112946 | 8.498942 | 0.359407 | 0.251841 | 0.359268 |
| LINC00884__antisen | 4.51181  | 0.306893 | 2.16474  | 0.257999 | 2.7509   | 20.1469  | 1.42759  | 3.77382  | 1.05298  | -1.72936 | 0.159069 | 1.888432 | 0.499065 | 0.911786 | 0.490629 |
| LINC00885__lincRN, | 0.016581 | 0        | 0.536521 | 0        | 1.45704  | 4.07165  | 0.846847 | 0.59166  | 0.469462 | -3.32132 | -1.78642 | 1.5349   | 0.248715 | 0.234392 | 0.449922 |
| LINC00886__lincRN, | 8.03867  | 5.21626  | 5.87276  | 3.90331  | 6.07821  | 317.01   | 5.98528  | 10.9888  | 9.12985  | -4.09552 | -0.4486  | 3.646914 | 0.428777 | 0.419536 | 0.435847 |
| LINC00888__pseudc  | 1.1794   | 1.31542  | 0.585543 | 0.4124   | 1.66509  | 8.31578  | 0.814211 | 1.21816  | 0.616565 | -1.75448 | 0.217687 | 1.972165 | 0.457038 | 0.343114 | 0.421028 |
| LINC00898__lincRN, | 0.020731 | 0.016296 | 0.207686 | 0.064416 | 3.8902   | 3.67248  | 0.128931 | 0.015128 | 0.060289 | -4.96197 | 0.260067 | 5.222037 | 0.179945 | 0.872546 | 0.191097 |
| LINC00900__lincRN, | 0.299063 | 0.063009 | 0.268994 | 0.197725 | 4.98954  | 1.1496   | 0.189048 | 0.086527 | 0.182928 | -3.32791 | 0.46086  | 3.788767 | 0.341894 | 0.296634 | 0.320873 |
| LINC00903__antisen | 0        | 0        | 0        | 0        | 0        | 2.05262  | 0        | 0        | 0        | #NUM!    | #DIV/0!  | #DIV/0!  | 0.42265  | #DIV/0!  | 0.42265  |
| LINC00904__lincRN, | 0        | 0.015808 | 0.107368 | 0.124691 | 15.8626  | 148.178  | 0.865802 | 0.029308 | 0.058389 | -10.3802 | -2.95251 | 7.427701 | 0.364007 | 0.447259 | 0.367434 |
| LINC00905__proces  | 0        | 0        | 0        | 0        | 3.93527  | 14.1881  | 1.3792   | 0        | 0.589499 | #NUM!    | #NUM!    | 3.202537 | 0.289343 | 0.242197 | 0.344265 |
| LINC00906__lincRN, | 0.016924 | 0        | 0.110188 | 0.349308 | 1.78793  | 0.152265 | 0.713    | 0.027778 | 0.046124 | -4.17086 | -2.63009 | 1.540778 | 0.313676 | 0.455479 | 0.518165 |
| LINC00907__lincRN, | 1.81574  | 0.424941 | 0.483458 | 0.332588 | 151.102  | 116.013  | 6.57165  | 1.08346  | 0.271654 | -6.61731 | -1.54093 | 5.07638  | 0.195063 | 0.374997 | 0.20965  |
| LINC00909__lincRN, | 0.608998 | 3.74309  | 0.495516 | 0.426692 | 0.280179 | 1.69208  | 0        | 1.0616   | 0.680583 | 1.014868 | 1.476376 | 0.461508 | 0.614614 | 0.349449 | 0.718605 |
| LINC00910__lincRN, | 0        | 0.443734 | 1.41193  | 0.535293 | 1.11401  | 8.64115  | 1.06609  | 0.313334 | 1.45214  | -2.4713  | -0.60966 | 1.861635 | 0.331062 | 0.47577  | 0.406253 |
| LINC00917__lincRN, | 0        | 0.088811 | 0.094295 | 0.082677 | 0.324031 | 2.50763  | 0.224475 | 0.037031 | 0.041045 | -3.99242 | -0.7245  | 3.267919 | 0.350057 | 0.708337 | 0.393747 |
| LINC00919__lincRN, | 0        | 0        | 0.14764  | 0.042141 | 0.157447 | 0        | 0.284839 | 0.020141 | 0.080237 | -0.43494 | -1.38359 | -0.94864 | 0.86362  | 0.532495 | 0.630644 |
| LINC00922__lincRN, | 0.123249 | 0.170401 | 0.843282 | 1.9258   | 23.7939  | 54.707   | 3.60952  | 0.214923 | 0.219583 | -6.14446 | -1.83065 | 4.31381  | 0.222046 | 0.526127 | 0.257512 |
| LINC00925__lincRN, | 0.105536 | 0.123928 | 0.35507  | 0.139504 | 0.269866 | 9.65694  | 0.144061 | 0.074945 | 0.208108 | -4.1061  | 0.452665 | 4.558769 | 0.41156  | 0.430639 | 0.411143 |
| LINC00928__lincRN, | 0        | 0.044759 | 3.17523  | 0        | 0.135322 | 5.32932  | 0.074452 | 0        | 0.055119 | -0.76307 | 4.635242 | 5.398313 | 0.398907 | 0.428366 | 0.416237 |
| LINC00936__lincRN, | 0.674651 | 0.207739 | 2.74342  | 0.09115  | 0.052401 | 1.71926  | 0.057632 | 0        | 0.852555 | 0.960823 | 1.994069 | 1.033247 | 0.143864 | 0.215992 | 0.367044 |
| LINC00937__lincRN, | 696.156  | 1.83426  | 1.11021  | 16.7902  | 11.3304  | 207.45   | 0.517891 | 0.23421  | 0.291171 | 1.56934  | 9.388241 | 7.8189   | 0.623111 | 0.420644 | 0.349308 |
| LINC00939__lincRN, | 0.084914 | 2.14842  | 1.54914  | 0.102603 | 5.34266  | 3.62545  | 2.2963   | 0.102556 | 0.142253 | -1.26189 | 0.573872 | 1.835758 | 0.198601 | 0.784446 | 0.43426  |
| LINC00940__lincRN, | 0.039053 | 0        | 0.408017 | 0.103802 | 1.95844  | 1.29096  | 0.153196 | 0.325174 | 0.056707 | -2.90697 | -0.25924 | 2.647722 | 0.219329 | 0.896753 | 0.205457 |
| LINC00942__lincRN, | 0.810524 | 0.072527 | 1.22688  | 1.07179  | 0.35528  | 3.41608  | 0.271036 | 1.99134  | 0.043439 | -1.19875 | -0.12808 | 1.070669 | 0.290071 | 0.951212 | 0.61782  |
| LINC00943__lincRN, | 0        | 0        | 0        | 30.5742  | 1.64132  | 4.24347  | 0.266713 | 0        | 0        | #NUM!    | #NUM!    | 7.094843 | 0.319023 | 0.42265  | 0.318186 |
| LINC00944__lincRN, | 3.30434  | 0.885303 | 0        | 0        | 1.98835  | 53.5455  | 0        | 3.08181  | 13.2569  | -3.72847 | -1.96339 | 1.765073 | 0.447553 | 0.493114 | 0.438526 |
| LINC00948__lincRN, | 0        | 0        | 0        | 0        | 1.99274  | 3.14316  | 0        | 0        | 0        | #NUM!    | #DIV/0!  | #DIV/0!  | 0.203247 | #DIV/0!  | 0.203247 |
| LINC00954__lincRN, | 0.279897 | 1.91111  | 0.957868 | 0.885572 | 170.785  | 3.4789   | 1.10185  | 0.777492 | 0.304793 | -5.79761 | 0.527774 | 6.325381 | 0.412029 | 0.6395   | 0.412708 |
| LINC00958__lincRN, | 0.09404  | 0.029633 | 15.4004  | 0.357091 | 0.303508 | 2.09865  | 0.648798 | 0.104766 | 0.045507 | 2.49216  | 4.28004  | 1.78788  | 0.44618  | 0.446702 | 0.456761 |
| LINC00959__lincRN, | 0        | 0.161474 | 0.951351 | 0.267832 | 1.95479  | 12.9739  | 0.198867 | 0        | 0.220675 | -3.77144 | 1.40734  | 5.178782 | 0.331232 | 0.483046 | 0.338765 |
| LINC00960__lincRN, | 0.085345 | 0.373879 | 3.7678   | 0.083848 | 0.259556 | 1.02515  | 1.41122  | 0.102771 | 1.82246  | 1.62699  | 0.341328 | -1.28566 | 0.398791 | 0.783028 | 0.269977 |
| LINC00969__lincRN, | 10.613   | 68.9239  | 97.8957  | 20.1116  | 73.5355  | 370.709  | 104.749  | 174.544  | 68.4767  | -1.38796 | -0.97086 | 0.417099 | 0.393243 | 0.319457 | 0.795849 |
| LINC00970__antisen | 2.15536  | 4.809    | 4.78729  | 18.4936  | 25.5815  | 298.418  | 2.05697  | 1.54475  | 2.76926  | -4.86514 | 0.883276 | 5.748416 | 0.352299 | 0.190784 | 0.346773 |
| LINC00971__lincRN, | 0        | 0        | 0        | 0        | 10.213   | 166.315  | 0.455227 | 0        | 0.030487 | #NUM!    | #NUM!    | 8.505575 | 0.388348 | 0.385361 | 0.389922 |

|                    |          |          |          |          |          |          |          |          |          |          |          |          |          |          |          |
|--------------------|----------|----------|----------|----------|----------|----------|----------|----------|----------|----------|----------|----------|----------|----------|----------|
| LINC00974__lincRN, | 0        | 0        | 0.041994 | 0        | 1.09528  | 0.066916 | 0.404893 | 0.131993 | 0.045672 | -4.79052 | -3.79414 | 0.996381 | 0.409666 | 0.267178 | 0.679799 |
| LINC00982__antisen | 0.10811  | 0.095075 | 0.093747 | 0.52318  | 1.89865  | 12.4737  | 0.131767 | 0.078547 | 0.330943 | -5.64861 | -0.86618 | 4.782422 | 0.326664 | 0.40965  | 0.325382 |
| LINC00987__lincRN, | 1.99525  | 0        | 8.72391  | 0        | 3.0374   | 0        | 0        | 0        | 6.47319  | 1.819283 | 0.727643 | -1.09164 | 0.53071  | 0.184977 | 0.722581 |
| LINC00989__lincRN, | 0.014635 | 0        | 0.04395  | 0.097194 | 3.20262  | 1.00214  | 0.014347 | 0        | 0.031863 | -6.19833 | 0.34232  | 6.540646 | 0.267351 | 0.40908  | 0.265981 |
| LINC00994__lincRN, | 0.028134 | 0.016588 | 0.885977 | 0.112129 | 9.28457  | 15.6349  | 0.504821 | 0.046127 | 0.076578 | -4.74929 | 0.568641 | 5.317933 | 0.201195 | 0.813751 | 0.221509 |
| LINC01019__lincRN, | 0.10982  | 0.043126 | 1.93329  | 2.97751  | 12.0587  | 14.8439  | 8.04985  | 0.070026 | 0.768376 | -3.84021 | -2.091   | 1.749214 | 0.101948 | 0.510641 | 0.367856 |
| LINC01020__lincRN, | 0        | 0        | 1.5377   | 0.073301 | 2.03542  | 54.9607  | 1.55005  | 0        | 0        | -5.21387 | -0.01154 | 5.202331 | 0.400296 | 0.996734 | 0.417391 |
| LINC01021__lincRN, | 7.05735  | 0        | 28.4539  | 11.9449  | 2.62206  | 6.11235  | 0.340237 | 2.03286  | 0.361668 | 0.780088 | 3.698787 | 2.918699 | 0.628005 | 0.346464 | 0.20089  |
| LINC01029__lincRN, | 0        | 0        | 0        | 7.9878   | 2.11769  | 5.71594  | 0.049967 | 0.055715 | 0        | #NUM!    | #NUM!    | 7.226008 | 0.090909 | 0.184709 | 0.092346 |
| LINC01034__lincRN, | 0        | 0        | 0        | 0        | 0        | 0        | 0        | 0        | 0        | #DIV/0!  | #DIV/0!  | #DIV/0!  | #DIV/0!  | #DIV/0!  | #DIV/0!  |
| LINC01036__lincRN, | 2.58383  | 0.182471 | 1.37201  | 10.2073  | 10.7083  | 52.1068  | 0.689539 | 2.31746  | 0.172168 | -4.14123 | 0.380393 | 4.521618 | 0.240634 | 0.821145 | 0.245746 |
| LINC01039__lincRN, | 0        | 0.324188 | 0.438305 | 0        | 1.30799  | 0.826035 | 0.836798 | 0.119156 | 0        | -1.48478 | -0.32622 | 1.158564 | 0.251166 | 0.88445  | 0.593228 |
| LINC01040__lincRN, | 0        | 0.063098 | 0.106654 | 3.39049  | 0.506682 | 3.16587  | 0.807313 | 0        | 0.057697 | -5.37879 | -2.34929 | 3.029501 | 0.13258  | 0.505201 | 0.12145  |
| LINC01044__lincRN, | 0.016541 | 0.064205 | 0.271286 | 0.356684 | 5.68618  | 1.84054  | 0.660539 | 0.059004 | 0        | -4.48504 | -1.03137 | 3.453666 | 0.256302 | 0.696373 | 0.302323 |
| LINC01046__lincRN, | 0        | 0        | 0        | 0        | 5.76923  | 0        | 0.927558 | 0        | 0        | #NUM!    | #NUM!    | 2.636869 | 0.42265  | 0.42265  | 0.521618 |
| LINC01047__lincRN, | 0        | 0.103895 | 1.96466  | 0        | 1.51342  | 1.90666  | 0.648184 | 0.047844 | 0        | -0.72541 | 1.571405 | 2.296812 | 0.446875 | 0.617107 | 0.368549 |
| LINC01049__lincRN, | 0        | 0        | 0.455763 | 0        | 24.0867  | 9.06702  | 0.479885 | 0        | 0.811718 | -6.18474 | -1.50281 | 4.681936 | 0.261987 | 0.192333 | 0.277659 |
| LINC01053__antisen | 0        | 0.472751 | 0.666586 | 0.23424  | 4.51539  | 32.1909  | 6.48071  | 0.338616 | 0.192547 | -5.01894 | -2.62161 | 2.397333 | 0.349665 | 0.478336 | 0.474294 |
| LINC01054__antisen | 0        | 0.86522  | 0        | 0        | 9.715    | 2.73224  | 1.52423  | 0        | 0.776098 | -3.84662 | -1.4107  | 2.435914 | 0.278027 | 0.567743 | 0.415717 |
| LINC01055__antisen | 0        | 0        | 0.443224 | 0        | 0        | 0        | 0.706568 | 0.561249 | 0        | #DIV/0!  | -1.51624 | #NUM!    | 0.42265  | 0.526445 | 0.188815 |
| LINC01056__lincRN, | 0        | 0.21148  | 0.498365 | 0.101702 | 1.8428   | 4.53938  | 0.225465 | 0.171131 | 0.027205 | -3.19128 | 0.744117 | 3.935399 | 0.235237 | 0.684763 | 0.273126 |
| LINC01057__lincRN, | 8.50126  | 64.6907  | 31.2993  | 78.9615  | 417.325  | 1158.3   | 38.2227  | 17.8591  | 26.9483  | -3.98502 | 0.331676 | 4.316692 | 0.243481 | 0.777296 | 0.244197 |
| LINC01058__lincRN, | 0.091778 | 0        | 0        | 0        | 0.838497 | 32.1899  | 0.58025  | 0        | 0.932976 | -8.49134 | -4.04333 | 4.448008 | 0.409459 | 0.220717 | 0.418189 |
| LINC01059__lincRN, | 0.013892 | 0        | 0.166892 | 0        | 2.31944  | 7.41346  | 0.867349 | 0.136663 | 0.075629 | -5.75053 | -2.57821 | 3.172319 | 0.275185 | 0.402906 | 0.35156  |
| LINC01060__lincRN, | 0.701722 | 0.382076 | 2.67219  | 0.394421 | 31.1756  | 259.637  | 0.88891  | 0.456752 | 0.178134 | -6.27671 | 1.301523 | 7.578232 | 0.358742 | 0.484948 | 0.359866 |
| LINC01065__lincRN, | 0        | 0        | 0        | 0        | 5.27698  | 4.64031  | 0.885524 | 0        | 0        | #NUM!    | #NUM!    | 3.485343 | 0.185181 | 0.42265  | 0.26376  |
| LINC01066__lincRN, | 0        | 0        | 0        | 0        | 1.89448  | 0        | 0        | 0        | 0        | #NUM!    | #DIV/0!  | #DIV/0!  | 0.42265  | #DIV/0!  | 0.42265  |
| LINC01067__lincRN, | 0        | 0        | 0.374717 | 0        | 0        | 6.59778  | 1.1529   | 0.116437 | 0.115832 | -4.13811 | -1.88619 | 2.251919 | 0.42265  | 0.508659 | 0.542956 |
| LINC01068__lincRN, | 0        | 0        | 0        | 4.34122  | 0        | 0        | 0        | 0        | 0        | #NUM!    | #DIV/0!  | #DIV/0!  | 0.42265  | #DIV/0!  | 0.42265  |
| LINC01072__lincRN, | 0        | 1.03317  | 0        | 0        | 3.67733  | 1.76207  | 1.00484  | 0        | 0        | -2.39637 | 0.040112 | 2.436482 | 0.199389 | 0.988651 | 0.39036  |
| LINC01074__lincRN, | 0        | 0        | 0        | 0        | 0.0711   | 0        | 0.065813 | 0        | 0        | #NUM!    | #NUM!    | 0.111486 | 0.42265  | 0.42265  | 0.968491 |
| LINC01075__lincRN, | 0        | 0        | 0.82587  | 0        | 5.85067  | 56.3324  | 1.16925  | 0        | 0        | -6.23446 | -0.5016  | 5.732867 | 0.36531  | 0.861509 | 0.378148 |
| LINC01077__lincRN, | 0        | 0        | 0        | 2.41768  | 2.01384  | 2.45922  | 1.66541  | 0        | 0.110644 | #NUM!    | #NUM!    | 1.955983 | 0.003803 | 0.385647 | 0.072534 |
| LINC01078__lincRN, | 0        | 0        | 0        | 0        | 0        | 0.210104 | 0        | 0        | 0        | #NUM!    | #DIV/0!  | #DIV/0!  | 0.42265  | #DIV/0!  | 0.42265  |
| LINC01085__lincRN, | 0.054308 | 0        | 0.030381 | 0        | 2.93663  | 4.80656  | 0.355578 | 0.113919 | 0.066073 | -6.51461 | -2.66082 | 3.853782 | 0.21141  | 0.196705 | 0.247322 |

|                        |                |                |                |                |                |                |                |               |                |                 |                |                 |                 |                 |                 |
|------------------------|----------------|----------------|----------------|----------------|----------------|----------------|----------------|---------------|----------------|-----------------|----------------|-----------------|-----------------|-----------------|-----------------|
| LINC01087__lincRN      | 0.074642       | 0.132018       | 0.074767       | 0.022078       | 0.249651       | 0.057701       | 0.22093        | 0             | 0.027125       | -0.22721        | 0.182102       | 0.409311        | 0.786761        | 0.904959        | 0.85347         |
| LINC01088__antisen     | 0              | 0.117772       | 2.345          | 0              | 4.73347        | 33.1522        | 2.39174        | 0.198193      | 6.9491         | -3.9433         | -1.95356       | 1.989737        | 0.343476        | 0.212649        | 0.387044        |
| LIPE-AS1__antisens     | 23.3556        | 421.62         | 18.6436        | 207.148        | 88.4107        | 1554.35        | 26.0563        | 25.1587       | 12.438         | -1.99644        | 2.86464        | 4.861082        | 0.494123        | 0.417631        | 0.336275        |
| LL22NC01-81G9.3__      | 0              | 0              | 0.559271       | 0              | 0              | 3.43527        | 0.803699       | 0             | 0              | -2.6188         | -0.52311       | 2.095696        | 0.42265         | 0.855873        | 0.569353        |
| LL22NC03-121E8.3__     | 0              | 0              | 0              | 0              | 0              | 1.48313        | 0.051789       | 0.115558      | 0              | #NUM!           | #NUM!          | 3.14773         | 0.42265         | 0.237021        | 0.489651        |
| LL22NC03-2H8.5__li     | 1.67383        | 5.4078         | 1.49523        | 3.63216        | 3.603          | 5.69414        | 1.61111        | 2.96956       | 5.525          | -0.59212        | -0.23664       | 0.355479        | 0.494618        | 0.812615        | 0.23274         |
| LL22NC03-86D4.1__      | 0.011689       | 0              | 1.82493        | 3.61768        | 53.6456        | 104.392        | 0.084194       | 0             | 0.038252       | -6.45972        | 3.906835       | 10.36656        | 0.20322         | 0.446535        | 0.205535        |
| LL22NC03-86G7.1__      | 0              | 0              | 0              | 0              | 0              | 10.9583        | 0              | 0             | 0              | #NUM!           | #DIV/0!        | #DIV/0!         | 0.42265         | #DIV/0!         | 0.42265         |
| LMCD1-AS1__antise      | 114.547        | 64.6907        | 98.143         | 48.1381        | 188.323        | 694.982        | 4.73634        | 5.83033       | 26.2775        | -1.7476         | 2.912359       | 4.659959        | 0.384092        | 0.03447         | 0.256321        |
| LOXL1-AS1__antise      | 0              | 0              | 1.26899        | 0              | 15.9802        | 118.169        | 0.279589       | 0             | 0              | -6.72401        | 2.182301       | 8.906315        | 0.349773        | 0.560397        | 0.351841        |
| LRCOL1__lincRNA        | 0.431145       | 0              | 1.78704        | 15.2131        | 3.98708        | 3.24691        | 1.01143        | 0             | 0.499373       | -3.33908        | 0.554064       | 3.893141        | 0.24061         | 0.710838        | 0.1944          |
| LRP4-AS1__antisen:     | 1.59909        | 1.51926        | 0.994796       | 127.455        | 7.68692        | 20.0521        | 4.31078        | 18.5709       | 53.6169        | -5.23769        | -4.21712       | 1.020568        | 0.315547        | 0.245395        | 0.645317        |
| LRRC3-AS1__antise      | 0.733272       | 0.125516       | 0.56845        | 0.345928       | 0.278382       | 1.82049        | 0.23203        | 0.245724      | 0.1546         | -0.77649        | 1.174422       | 1.950912        | 0.554754        | 0.305744        | 0.37344         |
| LRRC37A11P__pseu       | 0              | 0.009583       | 0.065126       | 0.086545       | 4.33054        | 3.03348        | 2.15513        | 0.017787      | 0.19493        | -6.63993        | -4.98615       | 1.653774        | 0.187787        | 0.386794        | 0.472404        |
| LRRC37A17P__pseu       | 0.117675       | 0.034701       | 0              | 0              | 2.20448        | 0              | 0              | 0             | 0              | -3.85473        | #DIV/0!        | #DIV/0!         | 0.454763        | 0.282924        | 0.42265         |
| LRRC37A6P__pseu        | 0.057533       | 0.083487       | 0.190691       | 0.017695       | 3.61973        | 3.14725        | 0.649718       | 0.145205      | 0.197993       | -4.35428        | -1.58174       | 2.772536        | 0.191758        | 0.35888         | 0.273241        |
| LSP1P3__pseudoge       | 2.32502        | 3.18479        | 3.69594        | 0.722581       | 1.44687        | 0.945207       | 0              | 4.00429       | 4.57522        | 1.563462        | 0.10164        | -1.46182        | 0.030397        | 0.861859        | 0.298678        |
| LUCAT1__lincRNA        | 0              | 0              | 0              | 0              | 0              | 0              | 0              | 0             | 0              | #DIV/0!         | #DIV/0!        | #DIV/0!         | #DIV/0!         | #DIV/0!         | #DIV/0!         |
| MACROD2-AS1__ar        | 2.31496        | 0              | 0.470973       | 0              | 28.1638        | 30.7991        | 0              | 0             | 0              | -4.40358        | #DIV/0!        | #DIV/0!         | 0.217577        | 0.319137        | 0.184318        |
| MACROD2-IT1__ser       | 2.28425        | 3.40451        | 1.99565        | 0.087417       | 9.11732        | 8.12688        | 3.18418        | 1.13957       | 8.78409        | -1.1734         | -0.77042       | 0.402976        | 0.357085        | 0.565873        | 0.715877        |
| MAFG-AS1__antiser      | 0.478668       | 0.28469        | 0.777673       | 0.29658        | 7.029          | 1.72533        | 0.352554       | 0.55787       | 0.712768       | -2.55417        | -0.07494       | 2.479229        | 0.363594        | 0.845891        | 0.345294        |
| MAGI1-IT1__sense_      | 5.40655        | 4.1646         | 2.39027        | 16.9192        | 10.7322        | 57.3175        | 4.4159         | 4.11384       | 3.5074         | -2.82855        | -0.0091        | 2.819442        | 0.254016        | 0.970738        | 0.243203        |
| <b>MALAT1__lincRNA</b> | <b>725.026</b> | <b>824.681</b> | <b>697.851</b> | <b>660.586</b> | <b>702.712</b> | <b>632.931</b> | <b>450.443</b> | <b>508.45</b> | <b>405.282</b> | <b>0.171081</b> | <b>0.72033</b> | <b>0.549249</b> | <b>0.126838</b> | <b>0.003793</b> | <b>0.004296</b> |
| MAP3K14-AS1__ant       | 0              | 0              | 0.318419       | 0              | 7.75574        | 5.16784        | 0.047918       | 0             | 1.42358        | -5.34294        | -2.20829       | 3.134648        | 0.204377        | 0.398182        | 0.232285        |
| MAP3K14__process       | 1.71833        | 1.32323        | 1.22524        | 4.02165        | 49.9894        | 13.0311        | 0.847123       | 1.84516       | 9.87914        | -3.97384        | -1.55892       | 2.41492         | 0.277021        | 0.449728        | 0.349584        |
| MAPKAPK5-AS1__li       | 0              | 0              | 0              | 0              | 0              | 0              | 0              | 0             | 0              | #DIV/0!         | #DIV/0!        | #DIV/0!         | #DIV/0!         | #DIV/0!         | #DIV/0!         |
| MAPT-AS1__antisen      | 0              | 0.028672       | 0.703211       | 0.04529        | 2.69458        | 17.0735        | 0.020142       | 0.01064       | 0.506128       | -4.75872        | 0.446932       | 5.20565         | 0.335783        | 0.434131        | 0.336888        |
| MARK2P9__pseudog       | 0              | 0.036977       | 0.141237       | 0              | 1.99116        | 0.104961       | 0.138297       | 0.119917      | 0              | -3.55604        | -0.53496       | 3.021083        | 0.433465        | 0.784537        | 0.43536         |
| MATN1-AS1__antise      | 0.44013        | 0.354155       | 1.03951        | 1.0024         | 2.81506        | 28.3081        | 0              | 0.585998      | 0.35964        | -4.13082        | 0.955472       | 5.08629         | 0.361371        | 0.391311        | 0.358344        |
| MBL1P__pseudogen       | 2.53747        | 0.054367       | 1.189          | 2.76704        | 2.41206        | 19.9684        | 0.719395       | 1.17462       | 1.99987        | -2.73364        | -0.0425        | 2.691133        | 0.348272        | 0.971427        | 0.32307         |
| MBNL1-AS1__antise      | 0              | 0              | 0              | 2.38067        | 0              | 0              | 0              | 1.19139       | 0              | #NUM!           | #NUM!          | 0.998722        | 0.42265         | 0.42265         | 0.742076        |
| MCM3AP-AS1__anti       | 1.05255        | 3.91185        | 1.12979        | 29.101         | 3.66168        | 7.02642        | 0.764949       | 0             | 0              | -2.70687        | 2.993999       | 5.700866        | 0.321286        | 0.246219        | 0.234251        |
| MED15P9__pseudog       | 1.37557        | 0.661132       | 2.02079        | 0.167334       | 2.63905        | 8.49707        | 0.826959       | 0.160766      | 0.747144       | -1.4781         | 1.225762       | 2.703865        | 0.391809        | 0.090428        | 0.323255        |
| MEF2C-AS1__antise      | 6.96586        | 2.66849        | 1.76813        | 1.37487        | 98.0219        | 34.3314        | 0.581747       | 4.41488       | 2.50675        | -3.55188        | 0.603736       | 4.15562         | 0.300158        | 0.661977        | 0.262928        |
| MEG3__lincRNA          | 1.17106        | 2.43928        | 1.81209        | 2.97785        | 121.856        | 28.2325        | 1.64415        | 1.62064       | 1.21732        | -4.81907        | 0.274761       | 5.093835        | 0.303109        | 0.513981        | 0.303919        |



|                       |          |          |          |          |          |          |          |          |          |          |          |          |          |          |          |
|-----------------------|----------|----------|----------|----------|----------|----------|----------|----------|----------|----------|----------|----------|----------|----------|----------|
| MEG8__lincRNA         | 2.95597  | 1.13961  | 1.87609  | 137.674  | 45.0489  | 25.6659  | 0.49761  | 2.56848  | 1.20029  | -5.125   | 0.485122 | 5.610121 | 0.186606 | 0.663132 | 0.190993 |
| MEG9__lincRNA         | 0.044785 | 0.029254 | 0.213027 | 0.133998 | 2.92316  | 0.426328 | 0.097335 | 0.04898  | 0.085387 | -3.60108 | 0.309111 | 3.910187 | 0.364322 | 0.77076  | 0.351398 |
| MEIS1-AS3__antisense  | 0        | 0        | 0        | 0        | 43.3906  | 0.46698  | 0        | 0        | 0.267723 | #NUM!    | #NUM!    | 7.355941 | 0.41647  | 0.42265  | 0.420005 |
| METTL21EP__pseudogene | 0.623784 | 4.35804  | 0.090269 | 4.08456  | 6.78149  | 1.53655  | 4.3021   | 0.674443 | 0.951962 | -1.28999 | -0.22509 | 1.064902 | 0.052256 | 0.906292 | 0.391117 |
| MFI2-AS1__antisense   | 0        | 0        | 0        | 0.712005 | 0        | 14.4012  | 0        | 0        | 0        | #NUM!    | #DIV/0!  | #DIV/0!  | 0.394844 | #DIV/0!  | 0.394844 |
| MIMT1__lincRNA        | 0.048811 | 0        | 0.14645  | 0        | 1.84015  | 1.79162  | 0.047751 | 0.110152 | 0        | -4.2172  | 0.306363 | 4.523561 | 0.196352 | 0.882303 | 0.194846 |
| MIPEPP3__pseudogene   | 0        | 0        | 0        | 0        | 0        | 0        | 1.74942  | 0        | 0        | #DIV/0!  | #NUM!    | #NUM!    | #DIV/0!  | 0.42265  | 0.42265  |
| MIR133A1__antisense   | 0.075251 | 0.040331 | 0.188308 | 4.9171   | 0.143034 | 0.019707 | 0.020153 | 0.089855 | 0.014921 | -4.06316 | 1.282428 | 5.345593 | 0.43098  | 0.452019 | 0.41585  |
| MIR137HG__lincRNA     | 0        | 0        | 0.144808 | 11.8817  | 0        | 106.237  | 0        | 0        | 0        | -9.67188 | #DIV/0!  | #DIV/0!  | 0.361979 | 0.42265  | 0.362056 |
| MIR181A1HG__lincRNA   | 87.2741  | 31.3717  | 5.15011  | 32.0351  | 48.6409  | 129.986  | 0.913261 | 9.19048  | 3.48394  | -0.76697 | 3.187592 | 3.954559 | 0.63552  | 0.286509 | 0.164091 |
| MIR210HG__lincRNA     | 0.153336 | 0.733316 | 0.465211 | 0.723331 | 0.31128  | 1.4082   | 0.460998 | 0.335117 | 0.350486 | -0.85359 | 0.237586 | 1.091179 | 0.46619  | 0.770387 | 0.313438 |
| MIR22HG__lincRNA      | 3.05719  | 1.98086  | 3.56222  | 1.41791  | 2.79132  | 45.8846  | 1.21085  | 2.84034  | 2.0605   | -2.54218 | 0.492811 | 3.03499  | 0.434484 | 0.432188 | 0.420575 |
| MIR3916__pseudogene   | 20.3607  | 82.7466  | 61.5271  | 34.0644  | 600.983  | 12.9717  | 13.9976  | 57.1819  | 12.7108  | -1.97677 | 0.97269  | 2.94946  | 0.464011 | 0.159609 | 0.401475 |
| MIR4435-1HG__lincRNA  | 32.3509  | 55.0972  | 225.759  | 109.326  | 60.3444  | 1709.79  | 58.9267  | 60.721   | 42.1549  | -2.58513 | 0.952882 | 3.538012 | 0.391484 | 0.529029 | 0.405603 |
| MIR4458HG__lincRNA    | 0.707531 | 0.836188 | 1.25946  | 0.541412 | 2.93663  | 3.0241   | 0.540197 | 0.603703 | 0.898388 | -1.21385 | 0.456878 | 1.670729 | 0.222952 | 0.04685  | 0.184162 |
| MIR4500HG__lincRNA    | 0.13675  | 0        | 0.562184 | 0.093613 | 11.4558  | 78.8654  | 0.741655 | 41.8189  | 0.051194 | -7.01526 | -5.92995 | 1.085308 | 0.345469 | 0.421457 | 0.673241 |
| MIR4519__antisense    | 0        | 14.0452  | 8.02411  | 5.95037  | 152.22   | 27.1076  | 6.19588  | 12.6304  | 17.3113  | -3.06958 | -0.71146 | 2.35812  | 0.325074 | 0.278244 | 0.384662 |
| MIR663A__processed    | 0        | 0        | 0        | 0        | 6.84311  | 2.70629  | 3.32515  | 0        | 0.08989  | #NUM!    | #NUM!    | 1.483507 | 0.250783 | 0.407259 | 0.559795 |
| MIR7-3HG__lincRNA     | 0        | 0        | 1.18416  | 0        | 18.9253  | 10.1465  | 0.174291 | 0.097208 | 0.048366 | -4.61768 | 1.888329 | 6.506013 | 0.231098 | 0.567288 | 0.223062 |
| MKI67IPP6__pseudogene | 136.904  | 69.5043  | 95.9816  | 91.4653  | 71.7193  | 49.2411  | 61.66    | 99.0747  | 133.363  | 0.509452 | 0.040114 | -0.46934 | 0.203662 | 0.94625  | 0.494845 |
| MKKN1-AS1__antisense  | 0        | 0.930599 | 1.21719  | 0.016511 | 4.34621  | 30.778   | 0.220305 | 0        | 0.746381 | -4.03222 | 1.151733 | 5.183953 | 0.359876 | 0.360268 | 0.349801 |
| MKRN9P__pseudogene    | 0.489716 | 0.636248 | 0.29907  | 0.385628 | 0.47866  | 0.285663 | 0.46362  | 0.843316 | 0.424495 | 0.309424 | -0.28097 | -0.59039 | 0.161177 | 0.273502 | 0.156294 |
| MLK7-AS1__antisense   | 19.1924  | 13.3577  | 16.9404  | 12.3296  | 28.6367  | 60.357   | 13.5935  | 5.32494  | 0.461697 | -1.03374 | 1.352573 | 2.386315 | 0.356927 | 0.09307  | 0.264053 |
| MMP12__processed      | 69.7089  | 19.3729  | 18.96    | 37.5947  | 1.99748  | 1.95053  | 7.37835  | 25.3906  | 9.8949   | 1.378922 | 1.340504 | -0.03842 | 0.046861 | 0.403444 | 0.983416 |
| MMP24-AS1__antisense  | 36.4721  | 33.1066  | 44.783   | 18.8036  | 18.6213  | 14.4991  | 28.1229  | 39.97    | 41.2275  | 1.139131 | 0.065041 | -1.07409 | 0.049748 | 0.744189 | 0.065343 |
| MORC2-AS1__antisense  | 0        | 0        | 0        | 5.0508   | 1.24505  | 3.5123   | 0        | 0        | 0        | #NUM!    | #DIV/0!  | #DIV/0!  | 0.097816 | #DIV/0!  | 0.097816 |
| MPRIIP1__pseudogene   | 4.91332  | 5.5144   | 4.3671   | 4.88387  | 3.60742  | 3.58468  | 2.93698  | 2.92177  | 3.15456  | 0.292953 | 0.714963 | 0.42201  | 0.238536 | 0.040322 | 0.161356 |
| MRGPRG-AS1__antisense | 0        | 0        | 0.410706 | 0.180121 | 0.380378 | 7.80343  | 1.37022  | 0.037062 | 0.098438 | -4.348   | -1.87428 | 2.473727 | 0.37988  | 0.5503   | 0.492615 |
| MROH3P__pseudogene    | 0.169627 | 3.19365  | 0.875289 | 116.552  | 5.02146  | 12.1861  | 0.636587 | 0.418667 | 0.269984 | -4.97992 | 1.677325 | 6.657247 | 0.360563 | 0.415636 | 0.344342 |
| MRPL23-AS1__antisense | 0        | 0.331187 | 0.659444 | 0.099107 | 88.7069  | 0.469415 | 0.244492 | 0.063536 | 0.218203 | -6.49377 | 0.912653 | 7.406424 | 0.423245 | 0.530483 | 0.421964 |
| MRPL3P1__pseudogene   | 17.5242  | 94.3968  | 16.2399  | 43.0246  | 29.8848  | 9.52038  | 12.6099  | 80.8526  | 83.4375  | 0.636719 | -0.46498 | -1.1017  | 0.621159 | 0.590548 | 0.424641 |
| MRPL45P2__pseudogene  | 1.28913  | 3.77671  | 1.59694  | 2.66878  | 4.09327  | 86.8553  | 2.33538  | 3.0532   | 3.76515  | -3.81258 | -0.45824 | 3.354344 | 0.411245 | 0.4279   | 0.413157 |
| MRPS31P2__pseudogene  | 294.941  | 6.68143  | 117.225  | 123.664  | 80.85    | 1.86492  | 0.851504 | 227.954  | 100.701  | 1.021129 | 0.346118 | -0.67501 | 0.440939 | 0.859989 | 0.670307 |
| MRV11-AS1__antisense  | 6.90797  | 4.71605  | 9.04913  | 2.84543  | 3.21054  | 115.125  | 4.90298  | 7.62038  | 8.86512  | -2.55133 | -0.04908 | 2.502257 | 0.453411 | 0.883136 | 0.458357 |
| MSL3P1__pseudogene    | 3.09554  | 2.47052  | 3.30196  | 1.91857  | 1.09401  | 0.927071 | 0.566968 | 2.68206  | 0.896353 | 1.170544 | 1.097107 | -0.07344 | 0.047298 | 0.220182 | 0.943048 |

|                    |          |          |          |          |          |          |          |          |          |          |          |          |          |          |          |
|--------------------|----------|----------|----------|----------|----------|----------|----------|----------|----------|----------|----------|----------|----------|----------|----------|
| MST1L__pseudogen   | 0.423194 | 0.123775 | 0.710337 | 0.218894 | 1.44761  | 1.34285  | 0.795451 | 0.528269 | 0.631955 | -1.25912 | -0.63733 | 0.621787 | 0.317139 | 0.273872 | 0.531069 |
| MST1P2__pseudoge   | 0        | 0.1485   | 0        | 0.341162 | 9.85379  | 5.35921  | 0        | 0        | 0.282093 | -6.71069 | -0.92571 | 5.784986 | 0.198112 | 0.758056 | 0.204938 |
| MSTO2P__pseudoge   | 4.90609  | 0.034732 | 26.9946  | 91.9668  | 730.118  | 1169.66  | 17.5236  | 0        | 15.2535  | -5.96273 | -0.03753 | 5.925201 | 0.167271 | 0.971805 | 0.173204 |
| MTHFD2P1__pseud    | 0        | 0.053736 | 0.102675 | 0        | 9.80091  | 4.56396  | 1.31133  | 0.037377 | 0        | -6.52106 | -3.10816 | 3.412896 | 0.234744 | 0.4767   | 0.307835 |
| MTMR9LP__pseudo    | 30.1944  | 14.0839  | 29.2611  | 14.518   | 8.01853  | 21.8751  | 12.0024  | 37.294   | 39.1492  | 0.72758  | -0.26627 | -0.99385 | 0.084048 | 0.723308 | 0.254125 |
| MTUS2-AS1__antise  | 0        | 0.239127 | 1.31595  | 0        | 0.307809 | 36.4713  | 0.339657 | 0        | 0.094275 | -4.56383 | 1.841446 | 6.405275 | 0.421523 | 0.498364 | 0.423201 |
| MTX1P1__pseudoge   | 0        | 0        | 0        | 0.567917 | 0        | 0        | 0        | 0        | 0        | #NUM!    | #DIV/0!  | #DIV/0!  | 0.42265  | #DIV/0!  | 0.42265  |
| MYADML__pseudog    | 0.166455 | 0.06543  | 0.444384 | 0.147436 | 0.296583 | 4.18136  | 0.176811 | 0.015162 | 0.105723 | -2.7739  | 1.183756 | 3.957659 | 0.391047 | 0.361894 | 0.388417 |
| MYCNOS__antisens   | 1.63426  | 0.151053 | 0.687304 | 1.38805  | 1.08351  | 0.8266   | 0.289414 | 0.397074 | 0.135974 | -0.41562 | 1.588018 | 2.00364  | 0.510861 | 0.353715 | 0.026362 |
| MYCNUN__lincRNA    | 0        | 0        | 0        | 0        | 14.6318  | 4.46154  | 0        | 0        | 0        | #NUM!    | #DIV/0!  | #DIV/0!  | 0.27936  | #DIV/0!  | 0.27936  |
| MYLK-AS1__antisen  | 1.7854   | 3.36891  | 1.80062  | 316.765  | 5.91684  | 33.432   | 2.91462  | 2.86759  | 2.63497  | -5.67816 | -0.2753  | 5.402858 | 0.363223 | 0.433721 | 0.363474 |
| NADK2-AS1__antise  | 0        | 0.05718  | 0        | 1.91894  | 0.357844 | 6.20309  | 0        | 0        | 0        | -7.21238 | #DIV/0!  | #DIV/0!  | 0.251879 | 0.42265  | 0.247136 |
| NALCN-AS1__antise  | 0.922755 | 0.791683 | 1.26205  | 82.4427  | 1195.07  | 899.74   | 2.79867  | 0.081206 | 0.179813 | -9.51468 | -0.03977 | 9.474908 | 0.161294 | 0.978925 | 0.161951 |
| NAP1L1P1__pseudo   | 101.873  | 153.914  | 120.901  | 59.9417  | 27.8537  | 6.14837  | 31.9196  | 87.1485  | 13.4846  | 2.003501 | 1.506804 | -0.4967  | 0.070105 | 0.02477  | 0.662218 |
| NAP1L4P3__pseudo   | 199.712  | 531.115  | 52.4685  | 63.6989  | 31.7318  | 21.8751  | 14.1414  | 62.4838  | 50.2417  | 2.739282 | 2.626241 | -0.11304 | 0.258388 | 0.248097 | 0.914887 |
| NAPA-AS1__antisen  | 0.162756 | 0.191941 | 0.61104  | 0.5081   | 0.965063 | 9.70762  | 0.194869 | 0.355514 | 0.314738 | -3.53325 | 0.158728 | 3.691975 | 0.354453 | 0.829132 | 0.36761  |
| NAV2-IT1__sense_ir | 0        | 0        | 0.927611 | 0.100332 | 0        | 0        | 0        | 0        | 0.082736 | 3.208738 | 3.486938 | 0.2782   | 0.488083 | 0.42265  | 0.921879 |
| NBEAP3__pseudoge   | 0.240438 | 0.244807 | 0.105209 | 0.085482 | 1.84841  | 0.103036 | 0.136132 | 0.071781 | 0.188752 | -1.7865  | 0.573904 | 2.360403 | 0.481636 | 0.488239 | 0.4678   |
| NBPF13P__pseudog   | 4.77846  | 6.47606  | 2.28297  | 0.356306 | 8.78913  | 20.1389  | 38.2227  | 10.3176  | 2.06409  | -1.11317 | -1.9023  | -0.78913 | 0.509637 | 0.364305 | 0.706834 |
| NBPF18P__antisens  | 193.907  | 185.887  | 514.582  | 289.629  | 107.199  | 145.815  | 124.619  | 137.04   | 165.414  | 0.720878 | 1.066399 | 0.345521 | 0.478    | 0.249128 | 0.604779 |
| NBPF22P__pseudog   | 0.035526 | 0        | 1.48284  | 0.13764  | 0.60254  | 3.57176  | 0.248561 | 0.032718 | 0.030557 | -1.50582 | 2.283662 | 3.78948  | 0.258955 | 0.525544 | 0.356422 |
| NBPF23__pseudoge   | 0        | 0        | 0        | 0        | 13.7953  | 44.6309  | 0.511144 | 0        | 0        | #NUM!    | #NUM!    | 6.836742 | 0.277901 | 0.42265  | 0.284261 |
| NBPF7__pseudogen   | 0.047614 | 0.064914 | 0.405647 | 0.066465 | 0.445957 | 24.3389  | 0.221764 | 4.32065  | 0.052302 | -5.58374 | -3.14846 | 2.435275 | 0.413078 | 0.449314 | 0.524476 |
| NBR2__pseudogene   | 2.47699  | 15.3322  | 1.9472   | 14.1326  | 9.04391  | 8.1736   | 7.45476  | 2.37561  | 3.98899  | -0.66615 | 0.515629 | 1.18178  | 0.542607 | 0.755672 | 0.01956  |
| NCOR1P1__pseudoi   | 0        | 0        | 0.54648  | 0        | 9.00102  | 11.4514  | 0.548945 | 0        | 0        | -5.22596 | -0.00649 | 5.219466 | 0.187213 | 0.998163 | 0.21162  |
| NDUFA5P11__pseu    | 107.978  | 139.47   | 74.6392  | 24.281   | 54.967   | 20.3483  | 23.1739  | 107.225  | 102.671  | 1.693287 | 0.466689 | -1.2266  | 0.01749  | 0.458777 | 0.209751 |
| NDUFA6-AS1__proc   | 18.8723  | 8.70764  | 8.58949  | 6.25075  | 7.68787  | 14.3261  | 11.8802  | 17.8983  | 18.4622  | 0.355768 | -0.41548 | -0.77125 | 0.671706 | 0.54128  | 0.067756 |
| NDUFV2P1__pseud    | 27.7233  | 13.2882  | 23.0841  | 7.36564  | 2.75689  | 3.95704  | 8.67898  | 22.0229  | 25.6559  | 2.186622 | 0.185611 | -2.00101 | 0.032693 | 0.788365 | 0.159669 |
| NEAT1__lincRNA     | 0        | 0        | 0        | 4.16451  | 8.73703  | 1.73026  | 0        | 0        | 0.861534 | #NUM!    | #NUM!    | 4.086056 | 0.140818 | 0.42265  | 0.181877 |
| NEBL-AS1__antisen  | 0        | 0        | 0        | 0        | 0        | 0        | 0        | 0        | 0.187895 | #DIV/0!  | #NUM!    | #NUM!    | #DIV/0!  | 0.42265  | 0.42265  |
| NEGR1-IT1__sense_  | 0        | 0        | 0        | 0        | 17.8938  | 25.0439  | 0        | 0        | 0        | #NUM!    | #DIV/0!  | #DIV/0!  | 0.194594 | #DIV/0!  | 0.194594 |
| NEURL3__pseudoge   | 0.255325 | 0.086032 | 0.874582 | 0.096783 | 0.681951 | 22.8725  | 2.08159  | 0.17926  | 0.138862 | -4.28177 | -0.98079 | 3.300982 | 0.411402 | 0.653263 | 0.462466 |
| NEXN-AS1__antisen  | 0        | 0        | 0        | 0        | 25.6035  | 37.9507  | 0        | 0        | 0        | #NUM!    | #DIV/0!  | #DIV/0!  | 0.198489 | #DIV/0!  | 0.198489 |
| NF1P1__pseudogen   | 0        | 0        | 0        | 0        | 1.44011  | 1.15976  | 0        | 0        | 0.055215 | #NUM!    | #NUM!    | 5.557246 | 0.188209 | 0.42265  | 0.190512 |
| NLRC3__polymorphi  | 1.74246  | 0.836666 | 2.93873  | 0.439032 | 4.39515  | 6.28752  | 2.1045   | 1.77667  | 1.41354  | -1.0112  | 0.059556 | 1.070754 | 0.360253 | 0.929515 | 0.41776  |

|                    |          |          |          |          |          |          |          |          |          |          |          |          |          |          |          |
|--------------------|----------|----------|----------|----------|----------|----------|----------|----------|----------|----------|----------|----------|----------|----------|----------|
| NNT-AS1__antisense | 0        | 4.13842  | 2.63932  | 6.82742  | 25.749   | 9.81538  | 10.1527  | 2.35563  | 1.06399  | -2.64491 | -1.00179 | 1.643118 | 0.135056 | 0.623805 | 0.339649 |
| NOP14-AS1__antise  | 10.1829  | 7.32166  | 12.6623  | 10.3639  | 3.931    | 17.1711  | 15.2041  | 8.78184  | 20.0759  | -0.06083 | -0.54657 | -0.48574 | 0.867113 | 0.115737 | 0.022927 |
| NOS2P3__pseudoge   | 0.005186 | 0.018347 | 0.10215  | 0.121877 | 1.16619  | 0.097789 | 0.12214  | 0.011346 | 0.088004 | -3.46291 | -0.81744 | 2.645467 | 0.369404 | 0.531295 | 0.41791  |
| NOVA1-AS1__antise  | 0.563854 | 14.6964  | 1.05317  | 47.2447  | 26.0575  | 40.2585  | 0.611488 | 6.95516  | 28.0036  | -2.79933 | -1.12461 | 1.674721 | 0.094569 | 0.603501 | 0.131788 |
| NPHP3-AS1__antise  | 0        | 8.52279  | 0        | 0        | 48.6409  | 35.4981  | 2.896    | 3.96336  | 0        | -3.30338 | 0.313252 | 3.616629 | 0.185023 | 0.822198 | 0.219109 |
| NPIPP1__pseudoge   | 1.65356  | 2.53099  | 3.4785   | 1.74147  | 8.7632   | 11.9375  | 2.12023  | 5.14808  | 1.89288  | -1.55022 | -0.25762 | 1.292605 | 0.187922 | 0.720563 | 0.282183 |
| NPM1P39__pseudoc   | 59.4898  | 53.4327  | 286.554  | 23.9335  | 80.4712  | 57.3446  | 69.8149  | 36.7483  | 73.6546  | 1.304351 | 1.148369 | -0.15598 | 0.412252 | 0.407913 | 0.837068 |
| NPM1P46__pseudoc   | 148.078  | 487.168  | 394.008  | 278.083  | 110.593  | 175.292  | 11.0222  | 174.787  | 6.12586  | 0.867914 | 2.422909 | 1.554995 | 0.408915 | 0.064116 | 0.334145 |
| NPPA-AS1__antisen  | 0        | 0        | 0        | 0        | 0        | 9.92495  | 0        | 0        | 0        | #NUM!    | #DIV/0!  | #DIV/0!  | 0.42265  | #DIV/0!  | 0.42265  |
| NR2E3__processed_  | 0.030105 | 0        | 0.821425 | 0.15993  | 10.3683  | 9.31843  | 0.38759  | 0.115148 | 0.703356 | -4.54269 | -0.50221 | 4.040482 | 0.181938 | 0.480034 | 0.196494 |
| NR2F1-AS1__proces  | 12.112   | 2.54795  | 9.34169  | 3.96175  | 132.934  | 398.421  | 0.816633 | 2.91198  | 1.4494   | -4.47919 | 2.212662 | 6.69185  | 0.280728 | 0.211578 | 0.267296 |
| NR2F2-AS1__antise  | 5.82846  | 5.63974  | 6.94904  | 3.48435  | 9.53666  | 39.9368  | 0.914579 | 3.32109  | 1.8423   | -1.52379 | 1.599396 | 3.123182 | 0.401136 | 0.044596 | 0.300323 |
| NT5C3AP1__pseudc   | 7.94695  | 10.9978  | 8.33671  | 3.97052  | 2.6471   | 18.4695  | 9.14764  | 6.75536  | 5.94646  | 0.120974 | 0.320323 | 0.199349 | 0.907656 | 0.37468  | 0.86799  |
| NTRK3-AS1__lincRN  | 0.066511 | 0.065357 | 0.604022 | 0        | 3.06507  | 3.98664  | 0.227078 | 0.024247 | 0.120774 | -3.26041 | 0.983805 | 4.244215 | 0.19355  | 0.588877 | 0.216757 |
| NUP210P1__pseudo   | 0        | 0        | 0.114271 | 0        | 1.78223  | 37.6883  | 0        | 0        | 0        | -8.43217 | #DIV/0!  | #DIV/0!  | 0.395944 | 0.42265  | 0.396023 |
| NUTM2A-AS1__anti   | 41.7717  | 85.7517  | 37.4882  | 259.724  | 77.8625  | 222.268  | 57.8121  | 83.8005  | 59.9714  | -1.76248 | -0.28881 | 1.473671 | 0.202504 | 0.237378 | 0.201735 |
| OACYLP__pseudoge   | 0        | 0        | 0.391013 | 14.7074  | 56.1082  | 35.5945  | 0        | 0        | 0        | -8.0882  | #DIV/0!  | #DIV/0!  | 0.097871 | 0.42265  | 0.097254 |
| OGFR-AS1__antiser  | 8.55237  | 9.20328  | 7.19101  | 3.54987  | 2.85556  | 16.036   | 3.92267  | 7.00971  | 8.12111  | 0.152682 | 0.388791 | 0.236109 | 0.879279 | 0.346545 | 0.781366 |
| OIP5-AS1__process  | 12.631   | 12.8981  | 9.44271  | 168.307  | 4.68927  | 404.41   | 6.14901  | 9.01081  | 5.7293   | -4.04532 | 0.743441 | 4.788763 | 0.262458 | 0.034503 | 0.253505 |
| OPCML-IT1__sense   | 0        | 0.023586 | 0.130215 | 0.02661  | 12.4642  | 0.153442 | 0.068702 | 0        | 0.054497 | -6.36127 | 0.320078 | 6.681347 | 0.420339 | 0.831613 | 0.420038 |
| OR10V2P__pseudoc   | 0        | 0        | 0.926108 | 0        | 9.80091  | 2.1255   | 0        | 0.0969   | 0        | -3.68684 | 3.256606 | 6.943442 | 0.356795 | 0.485866 | 0.31249  |
| OR11K2P__pseudoc   | 0        | 0        | 0        | 0.138478 | 6.14321  | 2.23269  | 0.102439 | 0.114246 | 0        | #NUM!    | #NUM!    | 5.29623  | 0.248101 | 0.184713 | 0.254857 |
| OR1D4__pseudogen   | 0.062576 | 0.14771  | 0.561184 | 0.245489 | 0.990021 | 0.410199 | 0.21252  | 0        | 0        | -1.09303 | 1.860012 | 2.953039 | 0.423196 | 0.461573 | 0.228226 |
| OR2L1P__pseudoge   | 0.035745 | 0        | 0.142839 | 0.141456 | 0        | 0.135511 | 0.104651 | 0.116715 | 0.077451 | -0.63311 | -0.74266 | -0.10955 | 0.463959 | 0.538715 | 0.906867 |
| OR2M1P__pseudoge   | 0        | 0        | 0        | 0        | 1.17004  | 1.09144  | 0        | 0        | 0        | #NUM!    | #DIV/0!  | #DIV/0!  | 0.183996 | #DIV/0!  | 0.183996 |
| OR4C1P__pseudoge   | 1.44428  | 0        | 0        | 0        | 0        | 76.8572  | 0.405148 | 0        | 0        | -5.73376 | 1.83383  | 7.567588 | 0.433599 | 0.42265  | 0.425701 |
| OR4C4P__pseudoge   | 0        | 0.084988 | 0.323867 | 0        | 0.649073 | 4.00937  | 0.175758 | 0        | 0        | -3.51019 | 1.218    | 4.728186 | 0.341946 | 0.644121 | 0.363384 |
| OR4F13P__pseudog   | 0.043858 | 0        | 0.146347 | 0.058255 | 0.093745 | 37.9399  | 2.40343  | 0        | 0.095489 | -7.64579 | -3.71568 | 3.930108 | 0.421    | 0.435225 | 0.458039 |
| OR4K3__pseudogen   | 0        | 0        | 0.056218 | 0.221646 | 1.71731  | 0.317689 | 0        | 0        | 0.425615 | -5.32699 | -2.92043 | 2.406559 | 0.274539 | 0.42265  | 0.390664 |
| OR52A4__pseudoge   | 0        | 0        | 0.09789  | 0        | 0.138618 | 72.3795  | 0.031887 | 0        | 0        | -9.53297 | 1.618202 | 11.15117 | 0.421544 | 0.629859 | 0.421799 |
| OR5E1P__pseudoge   | 0        | 0        | 0.536929 | 0        | 0        | 71.8781  | 0.521978 | 0        | 0        | -7.06468 | 0.040742 | 7.105419 | 0.42265  | 0.988473 | 0.426858 |
| OR5G5P__pseudoge   | 1.015    | 0.816579 | 0        | 1.66401  | 6.31487  | 7.0089   | 0        | 0        | 0        | -3.03263 | #DIV/0!  | #DIV/0!  | 0.149585 | 0.188253 | 0.096718 |
| OR6C72P__pseudoc   | 0        | 0        | 0        | 18.4936  | 111.091  | 1.94683  | 0.238137 | 0.189703 | 0        | #NUM!    | #NUM!    | 8.26412  | 0.325799 | 0.188686 | 0.326641 |
| OR7E14P__pseudoc   | 0.577635 | 0.291998 | 1.92544  | 7.55504  | 4.77403  | 7.82739  | 1.91621  | 0.659555 | 0.806119 | -2.85028 | -0.27494 | 2.575343 | 0.015237 | 0.810006 | 0.021804 |
| OR7E19P__pseudoc   | 0        | 0        | 0        | 0        | 0        | 0.896567 | 0        | 0        | 0        | #NUM!    | #DIV/0!  | #DIV/0!  | 0.42265  | #DIV/0!  | 0.42265  |

|                    |          |          |          |          |          |          |          |          |          |          |          |          |          |          |          |
|--------------------|----------|----------|----------|----------|----------|----------|----------|----------|----------|----------|----------|----------|----------|----------|----------|
| OR7E35P__pseudog   | 0.102807 | 0        | 0.307656 | 0        | 0.054165 | 0        | 0        | 0        | 0        | 2.921827 | #DIV/0!  | #DIV/0!  | 0.374497 | 0.269431 | 0.42265  |
| OR7E47P__pseudog   | 0        | 0        | 0.362214 | 0.229818 | 2.64537  | 61.0596  | 3.57459  | 0.567813 | 0.875945 | -7.46362 | -3.7923  | 3.671317 | 0.395879 | 0.264646 | 0.436012 |
| OR7E5P__pseudoge   | 0        | 0        | 0.066185 | 0        | 0.158896 | 0.142244 | 0.650252 | 0        | 0        | -2.18586 | -3.29642 | -1.11056 | 0.229961 | 0.48408  | 0.705464 |
| OR8G1__polymorph   | 0        | 0        | 0.467304 | 0        | 0.396621 | 0.539325 | 0.457694 | 0.188422 | 0.273422 | -1.00206 | -0.97655 | 0.025516 | 0.328787 | 0.508827 | 0.983345 |
| OR8G2P__pseudoge   | 0        | 0.085429 | 0.180856 | 0        | 0.076752 | 0        | 0.28266  | 0        | 0.078447 | 1.794696 | -0.43946 | -2.23415 | 0.395645 | 0.824838 | 0.458567 |
| OSER1-AS1__lincRf  | 8.89649  | 16.9754  | 7.77674  | 3.53721  | 11.1881  | 5.11488  | 7.88903  | 11.4322  | 11.2474  | 0.762122 | 0.138496 | -0.62363 | 0.042328 | 0.731271 | 0.176723 |
| OSTCP4__pseudoge   | 646.042  | 709.726  | 486.676  | 254.459  | 260.039  | 535.028  | 13.8682  | 222.012  | 249.754  | 0.811883 | 1.923679 | 1.111796 | 0.234772 | 0.05943  | 0.132098 |
| OTX2-AS1__antisen  | 0.036677 | 1.50388  | 2.68807  | 0.616204 | 48.6466  | 476.842  | 0.503252 | 0        | 0.053266 | -6.95902 | 2.92569  | 9.884707 | 0.367659 | 0.309293 | 0.366893 |
| OVCH2__polymorph   | 0.054007 | 0        | 7.65207  | 0        | 4.89438  | 15.5096  | 0.137706 | 0        | 0        | -1.40478 | 5.806333 | 7.211115 | 0.208074 | 0.428999 | 0.28058  |
| PABPC1P4__pseudc   | 5.53988  | 1437.81  | 415.734  | 587.297  | 2.25193  | 5.95031  | 645.146  | 222.146  | 10.0136  | 1.64242  | 1.08344  | -0.55898 | 0.544682 | 0.604258 | 0.284556 |
| PADI6__processed_  | 0        | 0        | 1.17623  | 0.050541 | 2.20072  | 2.43123  | 0.09945  | 0.027716 | 0        | -1.99311 | 3.209391 | 5.202497 | 0.201103 | 0.487041 | 0.193535 |
| PARGP1__pseudoge   | 4.88963  | 24.2579  | 9.96139  | 8.67374  | 3.34188  | 6.70309  | 0.949596 | 15.0057  | 2.56656  | 1.063017 | 1.078269 | 0.015252 | 0.45255  | 0.047784 | 0.992209 |
| PARP4P2__pseudog   | 0        | 5.99499  | 3.05498  | 0.16127  | 100.521  | 7.96327  | 39.9699  | 0.099729 | 0.330955 | -3.58557 | -2.15839 | 1.427181 | 0.392505 | 0.553014 | 0.636161 |
| PART1__lincRNA     | 1.06202  | 0        | 0        | 0        | 11.4222  | 23.4089  | 0        | 0        | 0        | -5.03549 | #DIV/0!  | #DIV/0!  | 0.252104 | 0.42265  | 0.227942 |
| PAXBP1-AS1__antis  | 0        | 0        | 0        | 0        | 4.33054  | 0        | 0        | 0        | 0        | #NUM!    | #DIV/0!  | #DIV/0!  | 0.42265  | #DIV/0!  | 0.42265  |
| PBX2P1__pseudoge   | 3.35597  | 6.88949  | 2.94432  | 2.98884  | 3.60625  | 19.1521  | 1.03921  | 3.32287  | 3.81688  | -0.96499 | 0.689431 | 1.654426 | 0.561695 | 0.333657 | 0.343972 |
| PCAT4__lincRNA     | 0        | 0        | 0        | 0        | 6.51552  | 337.008  | 0.042225 | 0        | 0        | #NUM!    | #NUM!    | 12.99004 | 0.411598 | 0.42265  | 0.41167  |
| PCAT6__antisense   | 0.341763 | 0.083396 | 0.310386 | 1.71629  | 0.828461 | 2.29589  | 0.615929 | 0.061741 | 0.60751  | -2.71831 | -0.80509 | 1.913227 | 0.062167 | 0.216209 | 0.047988 |
| PCBP1-AS1__antise  | 14.0391  | 0.799528 | 19.6014  | 10.676   | 45.4449  | 75.357   | 7.20099  | 13.741   | 11.847   | -1.93266 | 0.070875 | 2.003537 | 0.216509 | 0.942453 | 0.198266 |
| PCED1B-AS1__proc   | 0        | 2.71506  | 6.06544  | 54.5415  | 16.3288  | 9.91369  | 17.2529  | 2.0833   | 28.6664  | -3.20169 | -2.45074 | 0.750957 | 0.26222  | 0.203782 | 0.570856 |
| PCGEM1__lincRNA    | 0        | 0        | 0.038642 | 0        | 24.2655  | 2.19368  | 0        | 0        | 0        | -9.41938 | #DIV/0!  | #DIV/0!  | 0.373839 | 0.42265  | 0.373012 |
| PDCD4-AS1__antise  | 27.3981  | 31.1165  | 14.395   | 0.277496 | 1.36413  | 0.660356 | 0        | 0.163095 | 0.192904 | 4.98516  | 7.678092 | 2.692931 | 0.041643 | 0.041641 | 0.147777 |
| PDPK2__pseudogen   | 0        | 1.07903  | 0.584667 | 0.675508 | 4.1931   | 4.46334  | 0.621611 | 1.12331  | 0        | -2.48779 | -0.06877 | 2.419017 | 0.11803  | 0.945121 | 0.191421 |
| PDX1-AS1__antisen  | 0.287398 | 12.8898  | 1.12632  | 5.55445  | 18.9922  | 124.719  | 2.96044  | 0.903557 | 1.71602  | -3.38344 | 1.358029 | 4.741469 | 0.370875 | 0.590355 | 0.332891 |
| PDXDC2P__process   | 5.82765  | 16.3632  | 7.58696  | 25.6346  | 65.3479  | 44.4507  | 4.8569   | 19.0843  | 6.4906   | -2.18527 | -0.03134 | 2.15393  | 0.053179 | 0.87781  | 0.043027 |
| PDZK1P1__pseudog   | 0        | 1.46771  | 0        | 0        | 0.593382 | 0.688214 | 0        | 0        | 0.8028   | 0.195625 | 0.870454 | 0.674829 | 0.90343  | 0.770529 | 0.54259  |
| PFN1P11__pseudog   | 1.89875  | 11.6597  | 4.64211  | 0        | 0.473584 | 77.5015  | 50.8119  | 66.2001  | 62.3993  | -2.09903 | -3.30122 | -1.20219 | 0.531977 | 0.002305 | 0.306429 |
| PFN1P1__pseudoge   | 92.1078  | 51.8364  | 71.1162  | 52.5042  | 47.7541  | 15.5257  | 41.6642  | 56.8026  | 30.621   | 0.893306 | 0.736389 | -0.15692 | 0.161747 | 0.234922 | 0.628401 |
| PGCP1__pseudoger   | 0        | 0        | 0        | 0        | 2.55108  | 1.71195  | 0        | 0        | 0        | #NUM!    | #DIV/0!  | #DIV/0!  | 0.198876 | #DIV/0!  | 0.198876 |
| PHF2P2__pseudoge   | 0.124654 | 1.34073  | 2.02429  | 0.918208 | 20.317   | 85.3553  | 2.28571  | 0.099622 | 0.136839 | -4.93284 | 0.468426 | 5.401269 | 0.303537 | 0.821319 | 0.314068 |
| PI4KAP1__pseudoge  | 0        | 0.998802 | 1.05584  | 2.49698  | 0.771544 | 0.991923 | 1.34432  | 2.07213  | 0.461863 | -1.05212 | -0.91654 | 0.135576 | 0.492239 | 0.421454 | 0.87857  |
| PI4KAP2__pseudoge  | 1.12389  | 13.3577  | 1.86193  | 2.04901  | 1.44607  | 3.4789   | 1.30819  | 1.9918   | 1.09591  | 1.228665 | 1.894488 | 0.665824 | 0.551318 | 0.394553 | 0.417312 |
| PIEZO1P2__pseudo   | 0.037911 | 0        | 1.91434  | 0        | 61.719   | 15.8426  | 0.370984 | 0.041398 | 0.061845 | -5.31213 | 2.041488 | 7.35362  | 0.310063 | 0.546737 | 0.300934 |
| PIN1P1__pseudoger  | 0        | 0.115958 | 0        | 0        | 0        | 0.21768  | 0.095995 | 0.035685 | 0.071047 | -0.90861 | -0.80593 | 0.102673 | 0.761882 | 0.651864 | 0.951173 |
| PINK1-AS__antisens | 31.7619  | 20.8082  | 26.1204  | 11.2673  | 6.95763  | 23.4523  | 15.7882  | 55.3179  | 29.4732  | 0.91693  | -0.35407 | -1.271   | 0.141072 | 0.668957 | 0.305167 |

|                        |          |          |          |          |          |          |          |          |          |          |          |          |          |          |          |
|------------------------|----------|----------|----------|----------|----------|----------|----------|----------|----------|----------|----------|----------|----------|----------|----------|
| PITPNA-AS1__antisense  | 0        | 0        | 0        | 0        | 0        | 0        | 0        | 0        | 0        | #DIV/0!  | #DIV/0!  | #DIV/0!  | #DIV/0!  | #DIV/0!  | #DIV/0!  |
| PITRM1-AS1__processed  | 0        | 0        | 0        | 0        | 11.1881  | 200.636  | 0        | 0        | 0        | #NUM!    | #DIV/0!  | #DIV/0!  | 0.3914   | #DIV/0!  | 0.3914   |
| PKD1L2__polymorphic    | 0.003734 | 0.080235 | 0.881258 | 0.272631 | 49.9894  | 370.709  | 1.38668  | 0.140327 | 0.190833 | -8.76864 | -0.83166 | 7.936981 | 0.350206 | 0.719098 | 0.352546 |
| PKD1L3__processed      | 19.5273  | 22.2875  | 12.5146  | 7.62474  | 83.8483  | 11.4514  | 10.8261  | 20.9643  | 14.1024  | -0.92178 | 0.243465 | 1.165246 | 0.552601 | 0.455361 | 0.477521 |
| PKD1P6__pseudogene     | 0.41855  | 0.636034 | 3.23435  | 0.346623 | 4.20639  | 32.5288  | 0.726206 | 0.854851 | 2.11574  | -3.11202 | 0.214343 | 3.326364 | 0.35845  | 0.710427 | 0.370093 |
| PLCE1-AS1__antisense   | 0        | 0        | 0        | 0        | 0        | 6.04138  | 0        | 9.36859  | 0        | #NUM!    | #NUM!    | -0.63295 | 0.42265  | 0.42265  | 0.827679 |
| PLEKHA8P1__pseudogene  | 0.508819 | 0        | 1.54591  | 7.02682  | 177.245  | 130.49   | 1.77258  | 0        | 4.4721   | -7.25917 | -1.60368 | 5.655489 | 0.176672 | 0.241058 | 0.181199 |
| PLEKHM1P__pseudogene   | 2.16413  | 5.08103  | 1.77885  | 3.89353  | 72.9406  | 9.77181  | 15.817   | 5.49917  | 7.2278   | -3.26263 | -1.66135 | 1.60128  | 0.344673 | 0.233657 | 0.510873 |
| PLGLA__pseudogene      | 3.37319  | 2.55677  | 0.870372 | 0.3008   | 2.25031  | 3.11427  | 2.88028  | 0.139494 | 0.036205 | 0.263432 | 1.153971 | 0.890538 | 0.828325 | 0.169888 | 0.667939 |
| PLK1S1__processed      | 114.304  | 103.285  | 70.9848  | 41.4937  | 84.9409  | 116.861  | 112.533  | 77.5547  | 109.024  | 0.24623  | -0.05174 | -0.29797 | 0.70291  | 0.867618 | 0.551496 |
| PMCHL1__pseudogene     | 0        | 0        | 0.066618 | 0        | 2.20072  | 4.11623  | 0.114142 | 0.036358 | 0        | -6.56717 | -1.17578 | 5.391395 | 0.21704  | 0.646684 | 0.23469  |
| PMCHL2__pseudogene     | 0        | 0        | 0.09881  | 0        | 0.450871 | 0        | 0        | 0        | 0.053714 | -2.18998 | 0.87937  | 3.069353 | 0.55963  | 0.42265  | 0.495002 |
| PNLIPRP2__polymorphic  | 0        | 0        | 0.989491 | 3.24461  | 3.16287  | 2.90879  | 1.75542  | 0        | 0.113508 | -3.23499 | -0.91745 | 2.317541 | 0.023045 | 0.741191 | 0.039393 |
| POLRMT1P__pseudogene   | 1.5084   | 1.6026   | 2.47695  | 2.65185  | 1.35681  | 29.2433  | 1.38668  | 2.28084  | 2.75327  | -2.57305 | -0.20043 | 2.372617 | 0.403856 | 0.352328 | 0.416235 |
| POM121L1P__pseudogene  | 0.804537 | 0.390317 | 0.64553  | 0.412018 | 0.376382 | 0.394362 | 0.669744 | 0.33553  | 0.484076 | 0.637847 | 0.305324 | -0.33252 | 0.185605 | 0.067515 | 0.358513 |
| POM121L4P__pseudogene  | 0        | 0.022154 | 0.638755 | 0.032486 | 0.515437 | 2.77643  | 0.355227 | 0        | 0.023438 | -2.33055 | 0.803531 | 3.13408  | 0.299145 | 0.770758 | 0.396781 |
| POM121L9P__pseudogene  | 0.161661 | 0.115432 | 0.962173 | 0.139028 | 0.780927 | 0.934091 | 0.673799 | 0.030821 | 0.178734 | -0.58119 | 0.488422 | 1.069613 | 0.467429 | 0.781351 | 0.529566 |
| POTEKP__pseudogene     | 0.029925 | 0.043889 | 1.07805  | 0        | 0.551977 | 654.441  | 0.133786 | 0.024643 | 0.01247  | -9.15137 | 2.752761 | 11.90413 | 0.422227 | 0.471088 | 0.422303 |
| POU5F1P4__pseudogene   | 0        | 0        | 0.118881 | 0.275082 | 0.126363 | 0.738174 | 0.058107 | 0        | 0.064511 | -3.26096 | -0.04465 | 3.216311 | 0.145065 | 0.972888 | 0.183284 |
| PPATP1__pseudogene     | 74.4327  | 340.933  | 35.4179  | 4.73664  | 2.10858  | 43.9184  | 6.82476  | 105.168  | 77.0893  | 3.150568 | 1.253423 | -1.89715 | 0.332554 | 0.392667 | 0.262527 |
| PPBPP2__pseudogene     | 0.022923 | 0        | 0.137574 | 0.030366 | 0.097681 | 0.393333 | 0.044865 | 0.100049 | 0.489569 | -1.69979 | -1.98303 | -0.28325 | 0.239242 | 0.253519 | 0.329229 |
| PPIAL4E__pseudogene    | 0.141428 | 0.050157 | 0.139582 | 0.132335 | 0.273962 | 0.189977 | 0.180826 | 0.045073 | 0        | -0.84842 | 0.551881 | 1.400298 | 0.333332 | 0.581212 | 0.290488 |
| PPP1R2P4__pseudogene   | 11.5552  | 58.8097  | 2.45787  | 186.306  | 41.2948  | 171.792  | 64.2785  | 11.5616  | 13.8108  | -2.45535 | -0.29993 | 2.155418 | 0.227161 | 0.864496 | 0.113932 |
| PPY2__pseudogene       | 0        | 0.192616 | 0.271286 | 0        | 0        | 0.409092 | 2.79867  | 0        | 0        | 0.181395 | -2.59285 | -2.77424 | 0.866386 | 0.521718 | 0.512227 |
| PRAC2__antisense       | 0        | 30.8893  | 0.330932 | 0        | 10.037   | 1.41146  | 0.668966 | 8.09516  | 0.247296 | 1.447328 | 1.792655 | 0.345327 | 0.4533   | 0.437721 | 0.404014 |
| PRAMENP__pseudogene    | 1.40294  | 0        | 0.534658 | 0.064188 | 5.477    | 24.3788  | 0.484969 | 3.33344  | 0.063096 | -3.94877 | -1.00235 | 2.946421 | 0.340632 | 0.678377 | 0.384224 |
| PRKCQ-AS1__lincRNA     | 0.964075 | 0.467952 | 0.370775 | 0.457261 | 2.18887  | 13.0955  | 0.290486 | 0.916429 | 0.475765 | -3.12627 | 0.09948  | 3.225752 | 0.373756 | 0.915011 | 0.360106 |
| PRKG1-AS1__antisense   | 1.4625   | 23.1346  | 8.01357  | 6.46205  | 600.983  | 33.432   | 0.049417 | 20.4894  | 0        | -4.29663 | 0.666991 | 4.963623 | 0.392868 | 0.185437 | 0.384079 |
| PRKXP1__pseudogene     | 0        | 0        | 1.26582  | 0.76612  | 3.49608  | 4.84848  | 0.1118   | 0.167371 | 0.924902 | -2.84749 | 0.072149 | 2.919636 | 0.105617 | 0.909953 | 0.119904 |
| PRMT5-AS1__antisense   | 0        | 0        | 0        | 0        | 0        | 1.9316   | 0        | 0        | 0        | #NUM!    | #DIV/0!  | #DIV/0!  | 0.42265  | #DIV/0!  | 0.42265  |
| PROSER2-AS1__antisense | 1.45357  | 0.545235 | 1.79246  | 1.62309  | 58.379   | 88.0998  | 1.75508  | 0.795221 | 0.171815 | -5.28777 | 0.477951 | 5.765718 | 0.198041 | 0.629777 | 0.201424 |
| PROX1-AS1__antisense   | 19.3007  | 12.0863  | 3.67423  | 39.7165  | 15.1409  | 41.8621  | 5.19883  | 20.581   | 2.86551  | -1.46393 | 0.291576 | 1.755506 | 0.179953 | 0.775265 | 0.249408 |
| PRRT3-AS1__antisense   | 1.03082  | 10.88    | 1.13283  | 3.46244  | 4.65077  | 6.01559  | 1.57761  | 0.996855 | 1.66899  | -0.11529 | 1.620036 | 1.735328 | 0.924334 | 0.48745  | 0.046084 |
| PRSS30P__pseudogene    | 0        | 1.17658  | 0.099207 | 0.118601 | 0.201514 | 2.01991  | 0.068046 | 0.715687 | 0.075566 | -0.87514 | 0.570155 | 1.445291 | 0.715181 | 0.484533 | 0.575062 |
| PRSS41__pseudogene     | 0        | 0        | 0.600588 | 1.9154   | 0.072841 | 1.87126  | 0.732718 | 0        | 0.148855 | -2.68397 | -0.5537  | 2.130262 | 0.181839 | 0.811535 | 0.177612 |

|                        |          |          |          |          |          |          |          |          |          |          |          |          |          |          |          |
|------------------------|----------|----------|----------|----------|----------|----------|----------|----------|----------|----------|----------|----------|----------|----------|----------|
| PSG7__polymorphic      | 0        | 0        | 0.347439 | 0.11749  | 1.49268  | 0.381206 | 0.546989 | 0        | 0        | -2.51893 | -0.65475 | 1.864182 | 0.366267 | 0.822208 | 0.478586 |
| PSME2P2__pseudog       | 12.9241  | 7.40746  | 9.47413  | 4.36834  | 7.8294   | 7.66606  | 3.89681  | 11.2406  | 5.87849  | 0.585446 | 0.504107 | -0.08134 | 0.344372 | 0.514176 | 0.828564 |
| PSPC1P1__pseudog       | 3.67369  | 9.31111  | 4.52298  | 5.1634   | 6.07821  | 30.3928  | 3.05808  | 6.96931  | 1.08744  | -1.24978 | 0.65551  | 1.90529  | 0.466579 | 0.121843 | 0.400549 |
| PTCHD3P1__antisense    | 6.6851   | 13.1955  | 40.1443  | 8.12061  | 10.4422  | 19.9047  | 2.11101  | 6.93671  | 1.94692  | 0.641921 | 2.448761 | 1.80684  | 0.39217  | 0.273718 | 0.176387 |
| PTGES3P1__pseudog      | 74.7153  | 68.3131  | 59.3739  | 20.1055  | 15.5027  | 13.713   | 28.753   | 52.1476  | 44.9565  | 2.036946 | 0.685439 | -1.35151 | 0.002856 | 0.130233 | 0.096845 |
| PTMAP5__pseudog        | 262.713  | 245.815  | 332.054  | 108.925  | 62.5532  | 98.995   | 43.4457  | 110.451  | 156.852  | 1.635903 | 1.43564  | -0.20026 | 0.014496 | 0.018308 | 0.766641 |
| PTOV1-AS1__antisense   | 5.14526  | 1.02656  | 0        | 3.51382  | 1.26548  | 32.271   | 2.74861  | 6.35073  | 6.88309  | -2.58572 | -1.37272 | 1.212998 | 0.448283 | 0.372458 | 0.530429 |
| PTPRG-AS1__processed   | 8.34292  | 0.527805 | 0.937685 | 2.58885  | 8.76638  | 105.531  | 1.15468  | 0.753363 | 0.677121 | -3.57494 | 1.923763 | 5.498705 | 0.411645 | 0.420504 | 0.372519 |
| PTPRVP__pseudog        | 0.007068 | 0        | 0.396505 | 0.159993 | 4.45445  | 23.3118  | 0.235966 | 0.077359 | 0.053952 | -6.11265 | 0.13596  | 6.248609 | 0.319323 | 0.95001  | 0.327685 |
| PVRL3-AS1__antisense   | 22.957   | 7.46691  | 19.2533  | 15.9576  | 199.401  | 191.227  | 9.3436   | 29.5087  | 2.48033  | -3.0329  | 0.265303 | 3.298206 | 0.200705 | 0.843897 | 0.169874 |
| PWRN2__lincRNA         | 0.050427 | 0.008013 | 0.115743 | 0.036143 | 0.141216 | 0.258401 | 0.099981 | 0        | 0.029646 | -1.32293 | 0.426231 | 1.749161 | 0.2283   | 0.741886 | 0.360331 |
| PWRN4__lincRNA         | 0        | 0        | 0.031004 | 0        | 3.15291  | 2.27974  | 0        | 0        | 0        | -7.45307 | #DIV/0!  | #DIV/0!  | 0.194707 | 0.42265  | 0.19385  |
| PXN-AS1__antisense     | 110.286  | 56.1943  | 68.0025  | 72.4097  | 19.7417  | 31.1486  | 83.2471  | 115.585  | 92.2149  | 0.927309 | -0.31177 | -1.23908 | 0.000131 | 0.530806 | 0.151639 |
| PYY2__pseudogene       | 0        | 0        | 0.120804 | 0.119787 | 13.8751  | 2.01592  | 0.206652 | 0.17828  | 0        | -7.05023 | -1.67194 | 5.378299 | 0.344915 | 0.489074 | 0.348369 |
| RAB11B-AS1__antisense  | 2.84913  | 13.9144  | 5.65382  | 5.9608   | 10.5929  | 6.93146  | 1.7431   | 6.75722  | 4.325    | -0.06713 | 0.805621 | 0.872755 | 0.869587 | 0.24787  | 0.018205 |
| RAB30-AS1__lincRNA     | 5.23639  | 3.34179  | 5.8361   | 3.79284  | 3.28279  | 10.2121  | 3.38953  | 3.09287  | 4.1384   | -0.26225 | 0.440606 | 0.702856 | 0.640002 | 0.131203 | 0.367959 |
| RAC1P2__pseudog        | 47.2019  | 25.4021  | 48.1956  | 27.8655  | 15.0236  | 13.1247  | 10.3386  | 32.5974  | 24.3443  | 1.108761 | 0.84436  | -0.2644  | 0.095891 | 0.305511 | 0.76119  |
| RAD51-AS1__processed   | 3.05968  | 5.36556  | 1.33924  | 9.00845  | 4.95648  | 12.9046  | 1.61488  | 2.09681  | 1.49548  | -1.46036 | 0.907044 | 2.3674   | 0.24104  | 0.264469 | 0.099768 |
| RAMP2-AS1__lincRNA     | 5.76906  | 1.74693  | 3.47784  | 1.0314   | 3.68674  | 2.09613  | 0.547795 | 2.65029  | 3.57932  | 0.690063 | 0.697889 | 0.007826 | 0.544926 | 0.540671 | 0.988636 |
| RANBP20P__pseudog      | 9.35138  | 1.67018  | 7.74898  | 0        | 0        | 0        | 1.3836   | 0        | 18.79    | #DIV/0!  | -0.104   | #NUM!    | 0.115986 | 0.940949 | 0.38181  |
| RAPGEF4-AS1__antisense | 0.062319 | 1.51883  | 0.181063 | 1.5157   | 5.75265  | 43.9686  | 0.673543 | 0.020466 | 0.108756 | -4.86173 | 1.134337 | 5.996063 | 0.351045 | 0.658032 | 0.341826 |
| RASAL2-AS1__lincRNA    | 0        | 1.37203  | 0        | 0        | 0        | 10.7077  | 4.72857  | 4.13138  | 0        | -2.96426 | -2.69099 | 0.273278 | 0.500711 | 0.210354 | 0.914058 |
| RASSF8-AS1__antisense  | 1.07806  | 0        | 0.967368 | 2.27871  | 9.15433  | 0        | 1.01936  | 0        | 0        | -2.48273 | 1.004739 | 3.487474 | 0.41616  | 0.38874  | 0.349352 |
| RBBP4P2__pseudog       | 56.004   | 31.5472  | 30.2027  | 41.3603  | 11.0722  | 68.3837  | 35.3536  | 68.4242  | 85.0211  | -0.03704 | -0.68108 | -0.64404 | 0.96134  | 0.407428 | 0.34603  |
| RBFADN__processed      | 2.46038  | 2.6502   | 1.30471  | 2.71349  | 13.6958  | 6.07427  | 1.16756  | 1.94373  | 1.60463  | -1.80928 | 0.443975 | 2.253259 | 0.229102 | 0.347424 | 0.190232 |
| RBM26-AS1__antisense   | 3.23496  | 2.37749  | 1.28402  | 3.99882  | 4.65352  | 6.92982  | 2.16181  | 1.68508  | 6.61471  | -1.17597 | -0.60117 | 0.574792 | 0.182617 | 0.624498 | 0.156549 |
| RERG-AS1__lincRNA      | 0        | 0        | 0        | 0        | 0        | 25.6659  | 0        | 0        | 0        | #NUM!    | #DIV/0!  | #DIV/0!  | 0.42265  | #DIV/0!  | 0.42265  |
| RFPL1S__antisense      | 0.084265 | 0.066235 | 4.00102  | 0.097291 | 13.0924  | 106.237  | 0.765464 | 0.036902 | 0.030641 | -4.84634 | 2.317239 | 7.163581 | 0.354235 | 0.524402 | 0.36014  |
| RMST__processed        | 0        | 0.01246  | 0.142945 | 0.056321 | 6.33238  | 3.8374   | 2.46155  | 0.372553 | 0.028822 | -6.04008 | -4.20339 | 1.836694 | 0.205777 | 0.372306 | 0.430952 |
| RNF144A-AS1__processed | 0.096534 | 0.036659 | 0.47068  | 0.109726 | 0.781448 | 1.31468  | 0.386756 | 0.165818 | 0.522802 | -1.86902 | -0.83252 | 1.036496 | 0.178381 | 0.154358 | 0.372774 |
| RNF157-AS1__antisense  | 0        | 0        | 0        | 0        | 1.16702  | 66.6045  | 0        | 0        | 0        | #NUM!    | #DIV/0!  | #DIV/0!  | 0.412624 | #DIV/0!  | 0.412624 |
| RNF185-AS1__antisense  | 0        | 0        | 0        | 0        | 0        | 0        | 0        | 0        | 0        | #DIV/0!  | #DIV/0!  | #DIV/0!  | #DIV/0!  | #DIV/0!  | #DIV/0!  |
| RNF219-AS1__antisense  | 9.74749  | 14.4234  | 6.21311  | 8.89902  | 499.555  | 105.531  | 8.32509  | 7.58968  | 6.65452  | -4.33682 | 0.428951 | 4.765771 | 0.319576 | 0.354912 | 0.319546 |
| RNU105B__snoRNA        | 0        | 0        | 0        | 0        | 0        | 4.32391  | 0        | 0        | 0        | #NUM!    | #DIV/0!  | #DIV/0!  | 0.42265  | #DIV/0!  | 0.42265  |
| ROCK1P1__pseudog       | 2.51726  | 2.18631  | 4.04287  | 25.3915  | 48.2174  | 114.86   | 54.7021  | 10.4542  | 27.9576  | -4.42949 | -3.41223 | 1.017258 | 0.150584 | 0.160121 | 0.444931 |

|                     |          |          |          |          |          |          |          |          |          |          |          |          |          |          |          |
|---------------------|----------|----------|----------|----------|----------|----------|----------|----------|----------|----------|----------|----------|----------|----------|----------|
| RP1-102D24.5__anti  | 0        | 0        | 0        | 0        | 12.0587  | 22.1787  | 0.202285 | 0        | 0.299285 | #NUM!    | #NUM!    | 6.092978 | 0.216993 | 0.198357 | 0.220382 |
| RP1-102E24.6__pse   | 1475.64  | 68.7097  | 27.3608  | 244.219  | 23.2559  | 2.48886  | 3.59499  | 1410.89  | 1607.24  | 2.541498 | -0.94304 | -3.48453 | 0.390217 | 0.670733 | 0.255899 |
| RP1-102E24.9__pse   | 0        | 0        | 0        | 0        | 0        | 0        | 0        | 0        | 0        | #DIV/0!  | #DIV/0!  | #DIV/0!  | #DIV/0!  | #DIV/0!  | #DIV/0!  |
| RP1-10C16.1__lincR  | 0        | 2.82012  | 0        | 1.13971  | 3.86765  | 1.29276  | 1.26601  | 0        | 0        | -1.15962 | 1.155468 | 2.315091 | 0.003779 | 0.709741 | 0.287625 |
| RP1-117O3.2__antis  | 20.7623  | 9.94283  | 12.2295  | 12.0957  | 4.52855  | 1259.64  | 12.4044  | 21.1701  | 25.078   | -4.89364 | -0.45005 | 4.443591 | 0.429186 | 0.522377 | 0.430628 |
| RP1-118J21.25__an   | 0        | 0        | 0.318442 | 0.140456 | 0.0847   | 2.38423  | 0.181658 | 0.086813 | 0.057626 | -3.03461 | -0.03427 | 3.000341 | 0.361731 | 0.986588 | 0.433487 |
| RP1-127D3.4__antis  | 3.92931  | 0.7027   | 0.409539 | 0.155107 | 4.36687  | 15.261   | 0.157926 | 0.030349 | 0.105266 | -1.97232 | 4.102231 | 6.074552 | 0.459811 | 0.28667  | 0.286204 |
| RP1-137K24.1__linc  | 0        | 0        | 0        | 0        | 15.4694  | 11.9112  | 0.536582 | 0        | 0        | #NUM!    | #NUM!    | 5.673212 | 0.190312 | 0.42265  | 0.206479 |
| RP1-13P20.6__antis  | 0        | 0        | 0.578096 | 0        | 2.62159  | 3.92551  | 0        | 0        | 0.02187  | -3.50148 | 4.724271 | 8.225746 | 0.189474 | 0.42265  | 0.198821 |
| RP1-140A9.1__antis  | 0.071858 | 0.084769 | 0.682848 | 0.047392 | 1.80824  | 3.05101  | 0.210371 | 0.195519 | 0.272463 | -2.54718 | 0.307451 | 2.854628 | 0.198304 | 0.791923 | 0.241106 |
| RP1-140J1.1__lincR  | 0        | 0        | 0.079497 | 0.158275 | 12.5759  | 65.8776  | 0.10382  | 0.028934 | 0.057644 | -9.94963 | -1.26005 | 8.689579 | 0.323166 | 0.417757 | 0.324282 |
| RP1-148H17.1__linc  | 0        | 0        | 0.741085 | 0        | 2.97741  | 4.55162  | 0        | 0        | 0        | -3.34475 | #DIV/0!  | #DIV/0!  | 0.189585 | 0.42265  | 0.200786 |
| RP1-149A16.12__an   | 0.758258 | 0        | 0.571355 | 1.82889  | 0        | 0.936008 | 0        | 0        | 0        | -1.05622 | #DIV/0!  | #DIV/0!  | 0.267337 | 0.191453 | 0.223014 |
| RP1-149A16.3__linc  | 0.039493 | 0        | 0.237089 | 0        | 0.252742 | 18.0221  | 0.135358 | 0        | 0.551001 | -6.04601 | -1.31126 | 4.734752 | 0.415787 | 0.279196 | 0.418849 |
| RP1-150O5.3__lincR  | 0.178855 | 0.105594 | 0        | 0        | 1.56129  | 0        | 0.294506 | 0.096327 | 0        | -2.4565  | -0.45838 | 1.998115 | 0.497366 | 0.47061  | 0.547764 |
| RP1-151B14.6__anti  | 1.64024  | 0.507109 | 0.741222 | 1.33049  | 6.40656  | 30.3928  | 0.215922 | 1.02841  | 1.76569  | -3.72249 | -0.05942 | 3.663075 | 0.327038 | 0.961689 | 0.304392 |
| RP1-155G6.4__antis  | 0        | 0        | 2.04627  | 0        | 1.98356  | 40.6614  | 1.01143  | 0.097245 | 0        | -4.38131 | 0.88416  | 5.265467 | 0.393792 | 0.763063 | 0.411043 |
| RP1-158P9.1__lincR  | 0.312274 | 0        | 0        | 0        | 0.200722 | 0.537963 | 0.13887  | 0        | 0        | -1.24215 | 1.169077 | 2.411224 | 0.623341 | 0.42265  | 0.413784 |
| RP1-159A19.4__anti  | 0        | 0        | 0        | 1.61579  | 0        | 1.5913   | 0.754822 | 0        | 0        | #NUM!    | #NUM!    | 2.087056 | 0.183527 | 0.42265  | 0.21747  |
| RP1-15D23.2__lincR  | 1.45717  | 0.163586 | 0.955515 | 5.9417   | 77.8625  | 78.8654  | 0.926662 | 0.652578 | 0.299699 | -5.98052 | 0.455366 | 6.435883 | 0.16067  | 0.587077 | 0.158121 |
| RP1-166H1.2__lincR  | 0        | 0        | 3.75677  | 0        | 2.27261  | 2.8154   | 0        | 0        | 0        | -0.43761 | #DIV/0!  | #DIV/0!  | 0.687547 | 0.42265  | 0.18811  |
| RP1-167G20.1__linc  | 0.028262 | 0        | 1.79888  | 0        | 12.4016  | 41.376   | 1.56449  | 0.046336 | 0.791737 | -4.87934 | -0.39499 | 4.484359 | 0.276821 | 0.819202 | 0.301298 |
| RP1-178F10.1__anti  | 0.110978 | 0.196447 | 0        | 0.363643 | 2.81992  | 0.104255 | 0.053925 | 0.240655 | 0        | -3.41882 | 0.061577 | 3.480401 | 0.347633 | 0.897247 | 0.335299 |
| RP1-178F15.5__proc  | 0        | 0        | 0.658744 | 0        | 1.95666  | 11.3188  | 1.03905  | 0        | 0        | -4.3329  | -0.65748 | 3.675425 | 0.327905 | 0.821527 | 0.387467 |
| RP1-184J9.2__antis  | 20.6001  | 29.7964  | 0        | 8.33079  | 6.36524  | 62.5282  | 9.02315  | 27.576   | 17.828   | -0.61573 | -0.111   | 0.504727 | 0.771858 | 0.891118 | 0.734007 |
| RP1-18D14.7__antis  | 0        | 0        | 0        | 0        | 0.284319 | 0.114153 | 0        | 0        | 0        | #NUM!    | #NUM!    | 1.316542 | 0.42265  | 0.42265  | 0.679334 |
| RP1-191L6.2__lincR  | 0        | 0        | 0.982331 | 0.639329 | 0        | 62.5575  | 0        | 0        | 0        | -6.0075  | #DIV/0!  | #DIV/0!  | 0.416687 | 0.42265  | 0.41678  |
| RP1-197B17.3__linc  | 0.373041 | 0.401066 | 0.888984 | 2.17618  | 14.305   | 33.432   | 0.523879 | 0.95641  | 0.803171 | -4.90748 | -0.45735 | 4.450127 | 0.213844 | 0.384405 | 0.220823 |
| RP1-1J6.2__antisen: | 0        | 0        | 2.16458  | 1.30515  | 2.39753  | 288.191  | 0        | 0        | 0        | -7.07521 | #DIV/0!  | #DIV/0!  | 0.415202 | 0.42265  | 0.415258 |
| RP1-206D15.3__linc  | 0.797261 | 0        | 0        | 0        | 3.76925  | 2.40562  | 3.09937  | 0        | 0        | -2.95328 | -1.95885 | 0.994434 | 0.316434 | 0.42265  | 0.673633 |
| RP1-212P9.3__antis  | 0.739479 | 0.26424  | 0.172497 | 0        | 0.189992 | 7.49485  | 0.377362 | 0        | 0.351365 | -2.70786 | 0.690703 | 3.398565 | 0.489433 | 0.464703 | 0.438774 |
| RP1-213J1P__B.1__   | 0        | 0        | 2.52678  | 0.317358 | 1.38605  | 23.1152  | 0.961594 | 0        | 0.158185 | -3.29605 | 1.174086 | 4.470136 | 0.376367 | 0.682229 | 0.40531  |
| RP1-228P16.4__anti  | 0        | 0.585288 | 1.67286  | 0.087629 | 4.12171  | 9.30464  | 0.175443 | 0        | 0.041018 | -2.58124 | 3.382962 | 5.964203 | 0.227446 | 0.323513 | 0.242835 |
| RP1-231P7P.1__linc  | 0.859805 | 0        | 0        | 0        | 3.38061  | 8.61012  | 0.855756 | 0        | 0        | -3.80177 | 0.00681  | 3.808576 | 0.308232 | 0.42265  | 0.307953 |
| RP1-232N11.2__pro   | 0        | 0.124525 | 0.135904 | 0        | 10.078   | 3.40478  | 0.803174 | 0.03297  | 0.082102 | -5.69408 | -1.81799 | 3.876094 | 0.271329 | 0.531217 | 0.31634  |

|                     |          |          |          |          |          |          |          |          |          |          |          |          |          |          |          |
|---------------------|----------|----------|----------|----------|----------|----------|----------|----------|----------|----------|----------|----------|----------|----------|----------|
| RP1-251I12.1__lincF | 0        | 0        | 0.205555 | 0.433728 | 0        | 0        | 0.040134 | 0        | 0.044551 | -1.07727 | 1.279336 | 2.356602 | 0.725534 | 0.579439 | 0.491249 |
| RP1-261D10.2__anti  | 6.29434  | 1.38228  | 5.9034   | 16.5191  | 3.76906  | 5.62113  | 13.6472  | 0        | 1.34843  | -0.93198 | -0.14306 | 0.788927 | 0.322288 | 0.906692 | 0.012445 |
| RP1-272J12.1__anti  | 3.44641  | 2.8667   | 2.18477  | 11.483   | 7.45875  | 23.4089  | 0.679287 | 4.34877  | 0.114443 | -2.31721 | 0.724633 | 3.041842 | 0.155897 | 0.484819 | 0.169468 |
| RP1-272L16.1__lincI | 0        | 0        | 0.387227 | 0.663321 | 4.45445  | 6.68169  | 1.14591  | 0        | 0        | -4.9294  | -1.56524 | 3.364155 | 0.14869  | 0.637866 | 0.235435 |
| RP1-278O22.2__linc  | 0        | 0.823488 | 1.88935  | 0        | 27.5903  | 2.00343  | 1.48267  | 0.843752 | 2.32016  | -3.44742 | -0.77637 | 2.67105  | 0.420194 | 0.27697  | 0.462355 |
| RP1-283E3.4__pseu   | 3.48747  | 7.39003  | 0.949051 | 20.6801  | 5.5613   | 2.57714  | 1.7222   | 3.37086  | 1.09765  | -1.28497 | 0.933853 | 2.21882  | 0.435087 | 0.259185 | 0.317487 |
| RP1-288L1.4__lincR  | 0        | 0        | 1.1243   | 0        | 4.53447  | 1.80233  | 0        | 0        | 0        | -2.49473 | #DIV/0!  | #DIV/0!  | 0.343617 | 0.42265  | 0.250224 |
| RP1-288L1.5__lincR  | 0        | 0        | 0        | 0        | 0        | 2.20617  | 0.043573 | 0        | 0        | #NUM!    | #NUM!    | 5.661976 | 0.42265  | 0.42265  | 0.434163 |
| RP1-28O10.1__antis  | 24.3551  | 2.17137  | 3.54213  | 3.90477  | 1.66759  | 25.4267  | 0.765385 | 1.74429  | 6.3358   | -0.04397 | 1.765246 | 1.809213 | 0.982067 | 0.484259 | 0.338912 |
| RP1-293L6.1__antis  | 0        | 0        | 0.735464 | 0.314212 | 12.2741  | 8.03212  | 0.174817 | 0        | 0        | -4.80928 | 2.072809 | 6.882085 | 0.196185 | 0.571814 | 0.195306 |
| RP1-300I2.2__pseuc  | 0        | 0        | 1.30017  | 0.442151 | 0.638388 | 0        | 0        | 0        | 0        | 0.266949 | #DIV/0!  | #DIV/0!  | 0.916269 | 0.42265  | 0.196644 |
| RP1-302D9.2__lincR  | 0        | 0        | 0        | 0        | 1.45172  | 8.34422  | 0.906381 | 0        | 0        | #NUM!    | #NUM!    | 3.433994 | 0.332234 | 0.42265  | 0.39746  |
| RP1-302D9.3__antis  | 0        | 0        | 0        | 0        | 2.72498  | 2.62084  | 0        | 0        | 0        | #NUM!    | #DIV/0!  | #DIV/0!  | 0.183658 | #DIV/0!  | 0.183658 |
| RP1-34M23.5__antis  | 6.15922  | 3.29691  | 24.5004  | 3.81112  | 3.93218  | 10.7729  | 3.16997  | 5.12738  | 11.7533  | 0.874901 | 0.76004  | -0.11486 | 0.360573 | 0.392707 | 0.470636 |
| RP1-35C21.2__lincR  | 0        | 0        | 2.48715  | 2.77497  | 65.3479  | 54.488   | 2.91956  | 0.139182 | 0.138509 | -5.62345 | -0.36234 | 5.261111 | 0.170008 | 0.89066  | 0.187835 |
| RP1-37C10.3__antis  | 2.63344  | 1.3663   | 3.32038  | 2.12637  | 3.79713  | 22.7483  | 1.44144  | 6.78932  | 3.89075  | -1.96969 | -0.72763 | 1.242063 | 0.370601 | 0.503362 | 0.499872 |
| RP1-37J18.1__lincR  | 0.263051 | 0        | 0        | 0        | 0.672332 | 24.1474  | 0.251564 | 0.281084 | 0.13947  | -6.56    | -1.35337 | 5.206629 | 0.413126 | 0.247835 | 0.4194   |
| RP1-37N7.1__antise  | 0.008718 | 0.010279 | 0.16595  | 0.06715  | 0.305393 | 1.66315  | 0.079916 | 0.016967 | 0.079244 | -3.46034 | 0.070487 | 3.53083  | 0.300301 | 0.954698 | 0.333156 |
| RP1-37N7.3__lincRN  | 0.121261 | 0.038133 | 0.690525 | 2.85653  | 0.911548 | 4.698    | 0.21919  | 0.088324 | 0.16715  | -3.3163  | 0.840419 | 4.156715 | 0.108066 | 0.594902 | 0.130575 |
| RP1-39G22.7__antis  | 0.760032 | 0.919938 | 0        | 0.583437 | 0        | 0.42001  | 0.724648 | 0        | 0.9786   | 0.743471 | -0.01985 | -0.76332 | 0.619525 | 0.989997 | 0.298756 |
| RP1-41C23.1__lincR  | 0.38971  | 0.287399 | 1.55534  | 0.447922 | 10.9434  | 2.70696  | 0.365553 | 0.052887 | 0.972675 | -2.65882 | 0.682386 | 3.341206 | 0.360831 | 0.227201 | 0.334743 |
| RP1-43E13.2__antis  | 5.46698  | 4.39521  | 1.11987  | 2.93412  | 6.3386   | 49.4162  | 1.13353  | 1.39029  | 9.52898  | -2.41794 | -0.13422 | 2.28372  | 0.430938 | 0.937719 | 0.330769 |
| RP1-46F2.2__lincRN  | 0        | 0        | 0.474016 | 0        | 15.4373  | 48.3233  | 0        | 0        | 0        | -7.07159 | #DIV/0!  | #DIV/0!  | 0.273268 | 0.42265  | 0.274339 |
| RP1-50O24.6__antis  | 2.25471  | 1.15674  | 1.83182  | 1.60795  | 4.25782  | 4.38985  | 1.5568   | 0        | 0        | -0.96788 | 1.751883 | 2.719759 | 0.289265 | 0.064904 | 0.178798 |
| RP1-58B11.1__lincR  | 0        | 0        | 0.053977 | 0.071566 | 0.172712 | 0.360726 | 0.123292 | 0        | 0.039115 | -3.48652 | -1.58919 | 1.897327 | 0.114396 | 0.495895 | 0.306932 |
| RP1-59M18.2__proc   | 1.07766  | 0        | 0.117069 | 1.05452  | 0        | 4.68428  | 0.581651 | 3.35531  | 0.272731 | -2.26407 | -1.81703 | 0.447034 | 0.425582 | 0.48733  | 0.841294 |
| RP1-63G5.5__sense   | 0.088362 | 0.367626 | 0.963331 | 2.68486  | 147.139  | 36.9843  | 0.538243 | 0.539649 | 1.68     | -7.04021 | -0.95837 | 6.081848 | 0.291863 | 0.104988 | 0.295375 |
| RP1-63G5.7__lincRN  | 0.015367 | 0        | 4.11152  | 0.020407 | 0.065676 | 3.68703  | 0.447599 | 0        | 0        | 0.129299 | 3.204775 | 3.075477 | 0.524521 | 0.486176 | 0.482801 |
| RP1-65J11.5__antis  | 0.109029 | 0        | 0        | 0        | 2.76527  | 216.364  | 0.529882 | 0        | 0        | -10.9729 | -2.28096 | 8.691895 | 0.41561  | 0.42265  | 0.416734 |
| RP1-69M21.2__lincF  | 0        | 0        | 0.289589 | 0        | 0.312628 | 6.19807  | 0.194497 | 0        | 0        | -4.49073 | 0.574259 | 5.064992 | 0.39295  | 0.842618 | 0.412681 |
| RP1-71H24.1__antis  | 10.0581  | 5.59267  | 58.2596  | 8.83308  | 5.18998  | 61.0596  | 4.17383  | 35.35    | 18.9546  | -0.0227  | 0.337872 | 0.360575 | 0.780443 | 0.820547 | 0.815651 |
| RP1-74B13.2__lincR  | 0        | 0.150753 | 0        | 0        | 3.94334  | 2.30872  | 0.061953 | 0        | 0        | -5.37407 | 1.282948 | 6.657021 | 0.20663  | 0.685441 | 0.217956 |
| RP1-74M1.3__lincRN  | 0.930546 | 0.230994 | 0.678644 | 1.17574  | 22.2062  | 1.00186  | 0.538264 | 0.705654 | 0.275876 | -3.728   | 0.275974 | 4.003975 | 0.407817 | 0.748606 | 0.386656 |
| RP1-76B20.11__anti  | 0        | 0        | 0.57626  | 0        | 0.946724 | 0.764863 | 0.99035  | 0        | 0        | -1.57054 | -0.78122 | 0.789324 | 0.320975 | 0.791348 | 0.734622 |
| RP1-78O14.1__lincR  | 0.270412 | 0.933461 | 0.08283  | 8.28806  | 39.9138  | 323.286  | 3.57415  | 1.2304   | 0.059947 | -8.17349 | -1.91861 | 6.254881 | 0.343652 | 0.377282 | 0.349841 |



|                     |          |          |          |          |          |          |          |          |          |          |          |          |          |          |          |
|---------------------|----------|----------|----------|----------|----------|----------|----------|----------|----------|----------|----------|----------|----------|----------|----------|
| RP1-79C4.1__lincRN  | 0        | 0        | 1.04833  | 0        | 2.71169  | 8.77815  | 0.092301 | 0        | 0        | -3.45419 | 3.5056   | 6.959794 | 0.26408  | 0.475512 | 0.283801 |
| RP1-7G5.6__lincRN   | 0        | 0        | 0.42925  | 0        | 0.605201 | 18.4262  | 0.232626 | 0.155702 | 0.103282 | -5.47042 | -0.1957  | 5.274724 | 0.403572 | 0.916206 | 0.416039 |
| RP1-81P11.1__lincR  | 0        | 0        | 0        | 0        | 0        | 0        | 0        | 0        | 0        | #DIV/0!  | #DIV/0!  | #DIV/0!  | #DIV/0!  | #DIV/0!  | #DIV/0!  |
| RP1-85F18.5__antis  | 0.249492 | 0.107002 | 0.301743 | 0        | 30.7242  | 6.57473  | 0.155378 | 0.148496 | 0.221812 | -5.82438 | 0.324406 | 6.148789 | 0.323147 | 0.412504 | 0.320152 |
| RP1-90G24.10__ant   | 0.088878 | 0.069873 | 0.996926 | 4.80025  | 3.45277  | 288.191  | 0.625603 | 0        | 0.129001 | -8.00288 | 0.614948 | 8.617824 | 0.406499 | 0.773616 | 0.407467 |
| RP1-91G5.3__antise  | 0        | 0        | 0.142193 | 51.9691  | 10.9434  | 104.214  | 0.753893 | 0.103481 | 0.085893 | -10.1989 | -2.72982 | 7.469059 | 0.174865 | 0.393873 | 0.176761 |
| RP1-92O14.3__antis  | 3.79341  | 1.20444  | 6.91694  | 4.11329  | 1.67431  | 21.498   | 0.734746 | 5.16868  | 5.89752  | -1.19539 | 0.013851 | 1.209237 | 0.391841 | 0.987137 | 0.452877 |
| RP11-1000B6.2__an   | 0.01665  | 0.03927  | 0.066658 | 2.05291  | 1.28111  | 3.10122  | 0.048947 | 0.036379 | 0.090586 | -5.71422 | -0.52116 | 5.193062 | 0.055719 | 0.235898 | 0.055161 |
| RP11-1000B6.3__lin  | 6.1122   | 0.286507 | 0.151708 | 0.091956 | 1.4929   | 1.58812  | 0.143381 | 5.00065  | 0.360695 | 1.04575  | 0.250916 | -0.79483 | 0.690762 | 0.920654 | 0.637783 |
| RP11-1006G14.2__li  | 0.024398 | 1.03601  | 0.858802 | 2.03601  | 2.49396  | 26.362   | 0.249732 | 0.026677 | 0.093012 | -4.00865 | 2.377174 | 6.385821 | 0.347195 | 0.304677 | 0.333628 |
| RP11-1007G5.2__ar   | 0        | 0        | 0.022578 | 0        | 0        | 0.258236 | 0.848732 | 0        | 0.024527 | -3.51572 | -5.27344 | -1.75772 | 0.42265  | 0.421325 | 0.596643 |
| RP11-1007O24.2__li  | 0.060673 | 0.214819 | 0        | 0        | 0.31853  | 1.32054  | 0        | 0        | 0.196086 | -2.5728  | 0.490524 | 3.063319 | 0.406286 | 0.8457   | 0.28715  |
| RP11-1007O24.3__li  | 0.145416 | 1.18556  | 5.85     | 0.192546 | 2.62145  | 30.3928  | 1.18912  | 0.026438 | 0        | -2.20923 | 2.562561 | 4.771788 | 0.388809 | 0.431132 | 0.394811 |
| RP11-1008C21.1__li  | 0.753145 | 0.277703 | 1.70039  | 2.19789  | 14.9409  | 53.1556  | 0.677089 | 0.119844 | 1.24879  | -4.68578 | 0.416944 | 5.102727 | 0.271202 | 0.182949 | 0.270344 |
| RP11-100F15.2__lin  | 0        | 0        | 0.108724 | 0        | 0.810869 | 2.25291  | 0.132895 | 0        | 0.02951  | -4.81657 | -0.57892 | 4.237647 | 0.255753 | 0.799677 | 0.293315 |
| RP11-1012E15.1__li  | 0        | 0        | 0.061532 | 0        | 1.81093  | 0        | 0        | 0        | 0        | -4.87926 | #DIV/0!  | #DIV/0!  | 0.442589 | 0.42265  | 0.42265  |
| RP11-1016B18.1__p   | 0.009969 | 0.011755 | 0.167978 | 0.053049 | 4.3826   | 35.9322  | 0.950192 | 0        | 0.099104 | -7.73332 | -2.46761 | 5.265713 | 0.356185 | 0.473612 | 0.371371 |
| RP11-1018N14.1__li  | 0        | 0.070858 | 1.47362  | 3.7534   | 19.2257  | 19.5473  | 0.441363 | 0        | 1.49741  | -4.78317 | -0.32802 | 4.455143 | 0.110551 | 0.49146  | 0.118324 |
| RP11-1018N14.2__li  | 0        | 0.092159 | 1.05649  | 0.579165 | 12.0587  | 0.28257  | 0.184196 | 0.068513 | 0.250876 | -3.49165 | 1.18963  | 4.681275 | 0.43389  | 0.549523 | 0.402431 |
| RP11-101C11.1__lin  | 0.084103 | 0.119018 | 0.168348 | 0.089305 | 0.161654 | 26.1728  | 0.129392 | 0.064111 | 0.073208 | -6.15245 | 0.477965 | 6.630416 | 0.421588 | 0.490966 | 0.421383 |
| RP11-101O21.1__lin  | 1.52283  | 0        | 3.79463  | 0.139673 | 14.1092  | 103.801  | 0.95573  | 0        | 0.663521 | -4.47252 | 1.715411 | 6.187926 | 0.355623 | 0.328998 | 0.354271 |
| RP11-1022B3.1__lin  | 3.75389  | 0        | 0.03031  | 0.107359 | 100.76   | 13.181   | 0.0099   | 0.02207  | 0        | -4.91351 | 6.887128 | 11.80064 | 0.373908 | 0.421408 | 0.352071 |
| RP11-1023L17.1__p   | 37.496   | 224.344  | 9.97313  | 47.4103  | 11.5534  | 29.8184  | 5.55759  | 56.7421  | 3.52007  | 1.614274 | 2.046022 | 0.431748 | 0.506071 | 0.303441 | 0.802047 |
| RP11-1023L17.2__p   | 14.4071  | 15.6668  | 6.39561  | 10.0261  | 11.6061  | 20.4226  | 34.7796  | 54.6863  | 278.045  | -0.20558 | -3.33302 | -3.12744 | 0.78849  | 0.30548  | 0.283827 |
| RP11-1024P17.1__s   | 1.02183  | 1.51261  | 0.834085 | 0.408676 | 0.232063 | 1.58204  | 1.46544  | 1.16137  | 2.08918  | 0.599752 | -0.48544 | -1.0852  | 0.587786 | 0.434928 | 0.037697 |
| RP11-1028N23.3__li  | 0        | 0        | 0        | 2.45532  | 0.368596 | 2.51534  | 0        | 0.076187 | 0        | #NUM!    | #NUM!    | 6.13095  | 0.127803 | 0.42265  | 0.13851  |
| RP11-1029J19.2__li  | 0        | 0.183005 | 0.152906 | 4.36839  | 1.42099  | 2.21583  | 0.736729 | 0        | 0        | -4.57479 | -1.13305 | 3.441733 | 0.112134 | 0.701158 | 0.064401 |
| RP11-1029J19.5__li  | 0.448368 | 4.25076  | 1.14118  | 4.09683  | 38.4052  | 579.152  | 4.06411  | 0.303804 | 1.33376  | -6.73392 | 0.034659 | 6.768583 | 0.385973 | 0.985057 | 0.38588  |
| RP11-102C16.3__an   | 0        | 2.67994  | 5.09942  | 0        | 0        | 2.80656  | 0.628414 | 1.83479  | 1.54932  | 1.470849 | 0.955141 | -0.51571 | 0.185966 | 0.412701 | 0.698754 |
| RP11-102J14.1__linc | 0        | 0.922255 | 0.252985 | 0        | 1.97766  | 7.6228   | 0        | 0        | 0        | -3.03015 | #DIV/0!  | #DIV/0!  | 0.346635 | 0.290486 | 0.296164 |
| RP11-1036E20.9__li  | 0        | 0.049495 | 0.105091 | 0.027915 | 0.17973  | 4.05944  | 0.634266 | 0.011478 | 0.068607 | -4.78677 | -2.20822 | 2.578545 | 0.3999   | 0.492215 | 0.492302 |
| RP11-1038A11.3__li  | 0.099511 | 0        | 0.9654   | 0        | 63.8844  | 106.237  | 1.3773   | 0.108014 | 0.376133 | -7.31969 | -0.80569 | 6.513996 | 0.207364 | 0.674134 | 0.214009 |
| RP11-103B5.2__linc  | 0        | 0        | 0.399072 | 7.43104  | 1.59164  | 224.397  | 0        | 1.36381  | 0        | -9.19206 | -1.77292 | 7.41914  | 0.399739 | 0.608028 | 0.403272 |
| RP11-103J17.2__linc | 0.03603  | 0.014162 | 0.094265 | 0.095799 | 0.077092 | 18.3223  | 0.106026 | 0.15986  | 0.228829 | -7.00036 | -1.77596 | 5.224409 | 0.41877  | 0.038509 | 0.425623 |
| RP11-103J8.1__anti  | 18.6812  | 15.3588  | 17.0416  | 5.95489  | 100.521  | 597.631  | 4.20998  | 12.705   | 14.3403  | -3.78492 | 0.708704 | 4.493623 | 0.357644 | 0.234766 | 0.341426 |

|                      |          |          |          |          |          |          |          |          |          |          |          |          |          |          |          |         |
|----------------------|----------|----------|----------|----------|----------|----------|----------|----------|----------|----------|----------|----------|----------|----------|----------|---------|
| RP11-1041F24.1__li   | 0        | 0        | 0        | 0        | 0        | 0        | 0        | 0        | 0        | 0        | #DIV/0!  | #DIV/0!  | #DIV/0!  | #DIV/0!  | #DIV/0!  | #DIV/0! |
| RP11-1042B17.5__li   | 0        | 0        | 0        | 0        | 4.82421  | 0        | 0        | 0        | 0        | 0        | #NUM!    | #DIV/0!  | #DIV/0!  | 0.42265  | #DIV/0!  | 0.42265 |
| RP11-104E19.1__an    | 8.43206  | 0.504718 | 0.961711 | 1.90234  | 12.4507  | 216.364  | 0.574124 | 4.42393  | 1.57082  | -4.54277 | 0.591562 | 5.134335 | 0.409311 | 0.781605 | 0.397936 |         |
| RP11-104H15.7__pr    | 2.16631  | 0.595676 | 1.10863  | 1.19605  | 0.659355 | 351.707  | 0.680714 | 1.39639  | 1.02614  | -6.51326 | 0.318786 | 6.832044 | 0.424145 | 0.737792 | 0.423017 |         |
| RP11-104N10.1__an    | 0.250177 | 0.910022 | 1.23303  | 0.194556 | 5.19427  | 3.2219   | 1.40641  | 1.04154  | 1.97077  | -1.84718 | -0.88467 | 0.962506 | 0.240074 | 0.151265 | 0.462551 |         |
| RP11-1055B8.2__lin   | 0.231912 | 0.121739 | 0.765145 | 0        | 13.7645  | 14.6577  | 0.529951 | 0.311605 | 0.329033 | -4.667   | -0.06529 | 4.601712 | 0.190471 | 0.946727 | 0.199767 |         |
| RP11-105N13.4__pr    | 1.10566  | 2.96737  | 1.79123  | 1.6105   | 3.163    | 10.6844  | 0        | 1.68638  | 2.29723  | -1.39832 | 0.557873 | 1.956196 | 0.378326 | 0.385237 | 0.235652 |         |
| RP11-105N14.3__lin   | 0        | 0        | 0.747977 | 0.063989 | 1.00913  | 3.78537  | 0        | 0        | 0.229616 | -2.69944 | 1.703771 | 4.403213 | 0.25867  | 0.42265  | 0.277069 |         |
| RP11-1060J15.4__a    | 1.90708  | 0.231675 | 1.93026  | 0.382286 | 2.05927  | 2.18815  | 1.02739  | 4.15965  | 0.365428 | -0.18624 | -0.44845 | -0.26221 | 0.864785 | 0.801685 | 0.813384 |         |
| RP11-1069G10.2__li   | 0.800652 | 0.030463 | 0.025827 | 0.205082 | 2.60758  | 3.28815  | 0.050518 | 0.028165 | 0.056089 | -2.83173 | 2.668671 | 5.500403 | 0.279134 | 0.444627 | 0.167605 |         |
| RP11-106M3.2__pro    | 9.53511  | 17.9076  | 6.35767  | 19.5462  | 63.6229  | 148.732  | 2.40087  | 7.62307  | 9.66306  | -2.7784  | 0.779796 | 3.558194 | 0.236841 | 0.37058  | 0.188047 |         |
| RP11-106M7.1__linc   | 0.643054 | 28.4721  | 2.51891  | 0.982169 | 1.28372  | 19.4695  | 1.95542  | 5.68601  | 1.39875  | 0.541433 | 1.807056 | 1.265623 | 0.821636 | 0.429154 | 0.606459 |         |
| RP11-1070N10.4__li   | 0.023522 | 0        | 0        | 0.480691 | 0.225469 | 2.95721  | 0.087854 | 0.039661 | 0.078955 | -7.28304 | -3.13388 | 4.149165 | 0.299703 | 0.033581 | 0.31435  |         |
| RP11-1070N10.5__li   | 0        | 0        | 1.56188  | 0.149194 | 1.31246  | 259.637  | 0        | 0        | 0        | -7.38517 | #DIV/0!  | #DIV/0!  | 0.419387 | 0.42265  | 0.419407 |         |
| RP11-1070N10.6__s    | 0        | 0        | 0.136568 | 0        | 20.6853  | 7.13846  | 0.053417 | 0        | 0        | -7.67055 | 1.354262 | 9.024816 | 0.268017 | 0.672623 | 0.267303 |         |
| RP11-1072C15.2__li   | 0        | 0        | 0.154676 | 0        | 2.76929  | 0        | 0.09071  | 0        | 0        | -4.16219 | 0.769913 | 4.932108 | 0.455745 | 0.794043 | 0.441861 |         |
| RP11-1072C15.4__a    | 0        | 1.31133  | 0        | 0        | 0        | 2.20794  | 0        | 0        | 3.29877  | -0.75167 | -1.3309  | -0.57923 | 0.798419 | 0.676762 | 0.42265  |         |
| RP11-1078H9.6__lin   | 0        | 0.053065 | 0.146459 | 0.209445 | 15.117   | 1.94777  | 0.055187 | 0.061519 | 0.061285 | -6.43591 | 0.164761 | 6.600674 | 0.350275 | 0.877925 | 0.349511 |         |
| RP11-1079K10.5__li   | 0.034686 | 0        | 0.173566 | 0        | 0.222186 | 2.97406  | 0.101952 | 0.056832 | 0.113208 | -3.93998 | -0.38524 | 3.554743 | 0.385971 | 0.655297 | 0.41121  |         |
| RP11-1071I14.5__linc | 0        | 0        | 1.08932  | 0        | 3.33099  | 3.95323  | 0        | 0        | 0        | -2.74135 | #DIV/0!  | #DIV/0!  | 0.185814 | 0.42265  | 0.186466 |         |
| RP11-1081L13.4__a    | 0        | 0        | 0.456465 | 0        | 3.06858  | 44.9238  | 0        | 0        | 1.02947  | -6.71616 | -1.17333 | 5.542832 | 0.384273 | 0.42265  | 0.383792 |         |
| RP11-1084I9.1__linc  | 0.04595  | 0.1445   | 1.59873  | 1.19438  | 4.62028  | 95.9374  | 0.105095 | 0        | 0        | -5.82962 | 4.089533 | 9.919148 | 0.388962 | 0.394705 | 0.389037 |         |
| RP11-1085N6.6__lin   | 0        | 0        | 0        | 0        | 0        | 0        | 0.259887 | 0        | 0        | #DIV/0!  | #NUM!    | #NUM!    | #DIV/0!  | 0.42265  | 0.42265  |         |
| RP11-108B14.5__lin   | 0        | 0        | 0.180927 | 0.063251 | 0.244356 | 0.182375 | 0.121305 | 0.020803 | 0.072537 | -1.43732 | -0.24654 | 1.190776 | 0.293093 | 0.881298 | 0.378445 |         |
| RP11-108K14.4__ps    | 2.54176  | 1.4733   | 0.937695 | 3.97412  | 17.9124  | 7.6228   | 5.46124  | 0.776941 | 1.91754  | -2.57487 | -0.71958 | 1.855286 | 0.203682 | 0.414294 | 0.319672 |         |
| RP11-108K3.1__linc   | 19.407   | 8.24981  | 10.3538  | 26.7649  | 149.966  | 857.878  | 1.67861  | 3.86539  | 3.09477  | -4.76654 | 2.137504 | 6.904044 | 0.330419 | 0.137106 | 0.317216 |         |
| RP11-108P20.4__lin   | 0        | 0        | 1.62017  | 0        | 24.3804  | 0        | 0        | 0        | 0        | -3.9115  | #DIV/0!  | #DIV/0!  | 0.462203 | 0.42265  | 0.42265  |         |
| RP11-1090M7.1__ar    | 0.392284 | 0.67063  | 0        | 0        | 27.9986  | 2.189    | 0        | 0        | 0        | -4.82786 | #DIV/0!  | #DIV/0!  | 0.386718 | 0.210137 | 0.379405 |         |
| RP11-1094H24.3__li   | 0        | 0.149047 | 0        | 0        | 1.6625   | 9.26995  | 0.183785 | 0        | 0        | -6.19671 | -0.30225 | 5.894454 | 0.337165 | 0.915242 | 0.341191 |         |
| RP11-1094H24.4__li   | 0.175326 | 0.09648  | 3.06633  | 0.046665 | 1.50574  | 2.88187  | 0.096413 | 1.5663   | 2.57084  | -0.40966 | -0.34283 | 0.066829 | 0.556542 | 0.667136 | 0.638702 |         |
| RP11-1094M14.11__    | 3.07908  | 4.33937  | 8.77723  | 9.02181  | 2.70565  | 8.14605  | 1.67154  | 3.54805  | 1.7854   | -0.29524 | 1.209154 | 1.504392 | 0.657265 | 0.260543 | 0.238512 |         |
| RP11-1096D5.1__lin   | 0.040625 | 0.047906 | 0.189805 | 0.053981 | 0.463318 | 7.94299  | 0.192553 | 0        | 0.152008 | -4.92581 | -0.30793 | 4.617876 | 0.391595 | 0.766468 | 0.39974  |         |
| RP11-109D24.1__se    | 0        | 0        | 0.030201 | 0        | 0.064477 | 0.202039 | 0.029574 | 0.016485 | 0        | -3.14156 | -0.60891 | 2.532651 | 0.256624 | 0.798196 | 0.393197 |         |
| RP11-109E24.1__lin   | 0.113954 | 0        | 0.085333 | 0        | 0.15142  | 3.38371  | 0        | 0.030989 | 0        | -4.14884 | 2.685036 | 6.833877 | 0.417053 | 0.333086 | 0.402479 |         |
| RP11-109E24.2__an    | 0        | 0        | 0.383515 | 0        | 0        | 0        | 0.186    | 0        | 0        | #DIV/0!  | 1.04398  | #NUM!    | 0.42265  | 0.732462 | 0.42265  |         |

|                     |          |          |          |          |          |          |          |          |          |          |          |          |          |          |          |
|---------------------|----------|----------|----------|----------|----------|----------|----------|----------|----------|----------|----------|----------|----------|----------|----------|
| RP11-109G23.3__ar   | 0.025712 | 0.04548  | 0.14159  | 0        | 0.16499  | 0.049245 | 0.050432 | 0        | 0.042003 | -0.00982 | 1.202857 | 1.212677 | 0.994523 | 0.380933 | 0.592761 |
| RP11-109L13.1__ps   | 24.3777  | 5.32184  | 6.27735  | 161.294  | 16.9184  | 20.95    | 8.26951  | 47.2652  | 9.3935   | -2.4688  | -0.85177 | 1.617028 | 0.318209 | 0.628869 | 0.504576 |
| RP11-10K16.1__anti  | 1.62218  | 2.96711  | 1.08276  | 0.121636 | 2.97282  | 12.5238  | 1.03774  | 1.7261   | 1.75973  | -1.46129 | 0.326408 | 1.7877   | 0.502346 | 0.566531 | 0.41097  |
| RP11-10K17.6__linc  | 0        | 1.48809  | 2.06416  | 0        | 5.47656  | 476.842  | 1.05277  | 0        | 0        | -7.08511 | 1.754543 | 8.839652 | 0.41782  | 0.475972 | 0.417333 |
| RP11-10L12.4__anti  | 0        | 0        | 1.6466   | 2.06426  | 2.77698  | 3.45747  | 0        | 0        | 0.734015 | -2.3334  | 1.165609 | 3.499006 | 0.016589 | 0.42265  | 0.008159 |
| RP11-10L7.1__lincR  | 2.3406   | 0.635105 | 1.50558  | 0.806458 | 23.8734  | 17.1353  | 0.642051 | 2.41344  | 1.63733  | -3.22204 | -0.06654 | 3.155499 | 0.231491 | 0.950408 | 0.190354 |
| RP11-10N16.2__linc  | 0.022444 | 0.019347 | 1.29101  | 0.021778 | 3.12258  | 5.82486  | 1.2602   | 0.024492 | 0.107113 | -2.75052 | -0.0625  | 2.688025 | 0.197533 | 0.980111 | 0.339151 |
| RP11-10N16.3__anti  | 0        | 0        | 0.212096 | 0.488146 | 1.36108  | 10.8982  | 0.258458 | 0.17301  | 0        | -5.90934 | -1.02454 | 4.884809 | 0.328856 | 0.663559 | 0.351527 |
| RP11-10O17.3__linc  | 0.155856 | 0.277939 | 1.0468   | 5.81483  | 1.97875  | 10.1756  | 1.53938  | 0.921122 | 0.65851  | -3.60128 | -1.07491 | 2.526364 | 0.124575 | 0.399157 | 0.182425 |
| RP11-10O22.1__linc  | 0        | 0        | 1.46519  | 0        | 83.7824  | 72.485   | 1.65669  | 0        | 0        | -6.73679 | -0.17722 | 6.559569 | 0.186264 | 0.950009 | 0.194353 |
| RP11-1103G16.1__a   | 4.84341  | 227.289  | 4.27918  | 2.96671  | 12.4507  | 124.719  | 3.8621   | 3.74826  | 2.37309  | 0.754469 | 4.565618 | 3.81115  | 0.774324 | 0.415219 | 0.387372 |
| RP11-1109M24.16__   | 0        | 0        | 0        | 0        | 0        | 11.4301  | 0        | 0        | 0        | #NUM!    | #DIV/0!  | #DIV/0!  | 0.42265  | #DIV/0!  | 0.42265  |
| RP11-110A12.2__an   | 0        | 0        | 0.141934 | 0.046331 | 3.25379  | 10.9583  | 0.620211 | 0.191124 | 0.114148 | -6.65045 | -2.70499 | 3.945464 | 0.278445 | 0.303584 | 0.317751 |
| RP11-110I1.11__ant  | 0        | 0.541077 | 0.228545 | 3.75943  | 38.1974  | 3.64299  | 21.3945  | 0        | 0.061787 | -5.88873 | -4.80111 | 1.087628 | 0.318826 | 0.441947 | 0.669873 |
| RP11-110J1.2__pseI  | 3.4157   | 3.33958  | 2.30413  | 1.74695  | 19.2078  | 1.89755  | 2.77432  | 4.00597  | 3.20416  | -1.33485 | -0.14027 | 1.194585 | 0.501073 | 0.586164 | 0.514187 |
| RP11-110L15.1__lim  | 0.326903 | 0        | 0        | 21.1704  | 4.1479   | 10.918   | 1.50028  | 3.18315  | 1.43318  | -6.79243 | -4.2258  | 2.566631 | 0.132273 | 0.092359 | 0.204456 |
| RP11-110L15.2__lin  | 0.918535 | 0        | 0.970353 | 1.33626  | 1.90331  | 46.2304  | 0        | 0        | 1.12713  | -4.71094 | 0.744883 | 5.455827 | 0.393604 | 0.528018 | 0.382002 |
| RP11-1113L8.1__an   | 0.138762 | 0        | 0        | 0        | 0.967857 | 5.55814  | 0.162782 | 0.030253 | 0        | -5.55551 | -0.47625 | 5.079263 | 0.346561 | 0.188835 | 0.3516   |
| RP11-111A22.1__an   | 3.18576  | 5.73849  | 4.3446   | 14.2207  | 36.1301  | 6.71068  | 2.10606  | 5.59116  | 2.16879  | -2.10447 | 0.427505 | 2.531979 | 0.220107 | 0.192651 | 0.17844  |
| RP11-111E14.1__an   | 0        | 0        | 0        | 2.31387  | 5.65124  | 1115.06  | 0        | 0        | 0        | #NUM!    | #DIV/0!  | #DIV/0!  | 0.418534 | #DIV/0!  | 0.418534 |
| RP11-111H3.3__linc  | 0        | 0.110719 | 0        | 0        | 0        | 13.683   | 0        | 0        | 0        | -6.94934 | #DIV/0!  | #DIV/0!  | 0.42734  | 0.42265  | 0.42265  |
| RP11-111I12.1__linc | 0.142144 | 0.047897 | 0.153049 | 0.313533 | 9.04391  | 3.70236  | 0.844479 | 0.102854 | 1.24449  | -5.2504  | -2.67547 | 2.57493  | 0.240933 | 0.17835  | 0.324431 |
| RP11-111J6.2__lincI | 0.04154  | 0.490093 | 0.235033 | 0        | 0        | 0        | 1.05097  | 0.180647 | 0.044945 | #DIV/0!  | -0.73559 | #NUM!    | 0.188007 | 0.725581 | 0.309469 |
| RP11-111M22.3__lin  | 1.77027  | 0.391492 | 0.621225 | 2.5765   | 0.570348 | 0.196053 | 1.82575  | 2.06218  | 1.44762  | -0.26447 | -0.939   | -0.67454 | 0.651972 | 0.209684 | 0.448754 |
| RP11-1129I3.1__ser  | 0.904202 | 1.76067  | 0        | 3.91217  | 5.36611  | 29.6625  | 2.75364  | 0        | 0        | -3.86914 | -0.04727 | 3.82187  | 0.30261  | 0.979929 | 0.307416 |
| RP11-112H10.4__an   | 4.12635  | 1.13948  | 1.20974  | 2.07671  | 7.13885  | 19.6241  | 0.355555 | 1.08748  | 0.796654 | -2.15498 | 1.531709 | 3.686684 | 0.337006 | 0.355357 | 0.226353 |
| RP11-112J1.2__lincI | 0.035229 | 3.95708  | 1.2171   | 0        | 6.70357  | 93.7922  | 0.15571  | 0.461752 | 0.051638 | -4.26987 | 2.960825 | 7.230697 | 0.406002 | 0.288929 | 0.386525 |
| RP11-112L6.2__lincI | 0        | 1.00689  | 1.40778  | 0.617888 | 1.28753  | 1.84659  | 0.712175 | 0.2981   | 0.330804 | -0.63584 | 0.848432 | 1.484269 | 0.044587 | 0.579174 | 0.232064 |
| RP11-1136G11.8__li  | 0        | 0        | 0        | 0        | 0.773272 | 0        | 0        | 0        | 0        | #NUM!    | #DIV/0!  | #DIV/0!  | 0.42265  | #DIV/0!  | 0.42265  |
| RP11-114B7.6__anti  | 0        | 0        | 1.10218  | 0        | 2.58893  | 4.51161  | 0.66673  | 0        | 1.87375  | -2.68757 | -1.20474 | 1.482828 | 0.191037 | 0.185664 | 0.299001 |
| RP11-114G22.1__lin  | 0        | 0        | 2.45397  | 0.262954 | 34.1393  | 180.603  | 1.03863  | 0.120253 | 0.570578 | -6.45311 | 0.504795 | 6.957906 | 0.323469 | 0.805819 | 0.32794  |
| RP11-114H23.1__lin  | 4.61954  | 0        | 1.52906  | 14.7955  | 192.484  | 124.719  | 3.07321  | 3.26686  | 2.03277  | -5.75477 | -0.44546 | 5.309316 | 0.177598 | 0.648104 | 0.172574 |
| RP11-114H24.2__ps   | 0        | 0.077201 | 0.36592  | 0.165123 | 0.370188 | 1.19742  | 0.188512 | 0.020552 | 0        | -1.96728 | 1.083758 | 3.051035 | 0.169891 | 0.674773 | 0.294917 |
| RP11-114H24.6__an   | 0.230451 | 0.15534  | 0.164491 | 0.347742 | 0        | 2.4917   | 0.128592 | 0        | 0.03569  | -2.36736 | 1.743998 | 4.111362 | 0.434065 | 0.014094 | 0.373621 |
| RP11-114N19.3__an   | 1.86792  | 0.134407 | 1.50186  | 1.719    | 12.5759  | 19.6241  | 0.559948 | 1.09722  | 0.9499   | -3.27494 | 0.426652 | 3.701594 | 0.201181 | 0.698051 | 0.176426 |

|                     |          |          |          |          |          |          |          |          |          |          |          |          |          |          |          |         |
|---------------------|----------|----------|----------|----------|----------|----------|----------|----------|----------|----------|----------|----------|----------|----------|----------|---------|
| RP11-1151B14.4__a   | 0        | 0        | 0        | 0        | 0        | 0        | 0        | 0        | 0        | 0        | #DIV/0!  | #DIV/0!  | #DIV/0!  | #DIV/0!  | #DIV/0!  | #DIV/0! |
| RP11-1152H15.1__li  | 1.40014  | 0        | 2.67297  | 0        | 53.505   | 579.152  | 1.16054  | 0        | 0        | -7.27915 | 1.811335 | 9.090483 | 0.373162 | 0.373409 | 0.373139 |         |
| RP11-115A15.1__lin  | 0        | 0        | 0        | 0        | 0        | 1709.79  | 0        | 0        | 0        | #NUM!    | #DIV/0!  | #DIV/0!  | 0.42265  | #DIV/0!  | 0.42265  |         |
| RP11-115C10.1__an   | 0.092386 | 0        | 0        | 0        | 1.42851  | 2.60257  | 0        | 0        | 0        | -5.44736 | #DIV/0!  | #DIV/0!  | 0.234413 | 0.42265  | 0.216076 |         |
| RP11-115D19.1__an   | 10.452   | 0.114408 | 0.732905 | 50.2703  | 159.4    | 126.717  | 0.040017 | 0.079587 | 0.227959 | -4.89582 | 5.022813 | 9.91863  | 0.093079 | 0.393436 | 0.074087 |         |
| RP11-115F18.1__an   | 0        | 0        | 0        | 0        | 1.20556  | 2.10402  | 0        | 0        | 0        | #NUM!    | #DIV/0!  | #DIV/0!  | 0.212023 | #DIV/0!  | 0.212023 |         |
| RP11-115H18.1__lin  | 0.04158  | 0        | 0.703441 | 0        | 2.33753  | 4.14759  | 0.484856 | 0        | 0        | -3.12178 | 0.619725 | 3.741505 | 0.203868 | 0.819346 | 0.276103 |         |
| RP11-115J23.1__linc | 0.11855  | 0        | 1.18293  | 0        | 25.4741  | 29.5716  | 1.41293  | 0        | 0        | -5.4024  | -0.11854 | 5.283868 | 0.186495 | 0.963304 | 0.207176 |         |
| RP11-115K3.2__pse   | 0        | 0.015139 | 0.992779 | 0.187824 | 4.68928  | 7.62125  | 2.13695  | 0.056144 | 0.629637 | -3.63229 | -1.48571 | 2.146575 | 0.182291 | 0.5167   | 0.351262 |         |
| RP11-116A1.1__linc  | 0        | 0        | 0.100345 | 0        | 6.8118   | 2.1721   | 0.194563 | 0        | 0        | -6.4843  | -0.95527 | 5.529033 | 0.279634 | 0.751517 | 0.290512 |         |
| RP11-116D17.2__lin  | 0        | 0        | 0.407722 | 0        | 1.70854  | 5.15271  | 0.132259 | 0        | 0        | -4.07281 | 1.62422  | 5.697034 | 0.261196 | 0.628967 | 0.284559 |         |
| RP11-116D2.1__linc  | 4.46897  | 0        | 0.174977 | 0        | 0.31091  | 0.389583 | 0.095144 | 0        | 0        | 2.728909 | 5.6091   | 2.880191 | 0.492352 | 0.400032 | 0.311247 |         |
| RP11-116N8.1__sen   | 0.240428 | 0.284039 | 2.6426   | 0        | 18.6658  | 24.4279  | 0        | 0        | 0        | -3.76626 | #DIV/0!  | #DIV/0!  | 0.191318 | 0.314826 | 0.190706 |         |
| RP11-116O11.1__an   | 0        | 0        | 0.220576 | 0        | 202.165  | 62.5575  | 0.428941 | 0        | 0        | -10.229  | -0.9595  | 9.269486 | 0.278162 | 0.750588 | 0.278954 |         |
| RP11-116O18.1__se   | 0        | 0.020066 | 0.153264 | 0.022583 | 0.163513 | 0.032527 | 0.033345 | 0        | 0.018513 | -0.33493 | 1.740894 | 2.07582  | 0.86153  | 0.499978 | 0.414572 |         |
| RP11-116O18.3__an   | 0.788052 | 0.177883 | 0.395375 | 0.293747 | 27.9071  | 17.6396  | 0.225292 | 0.291458 | 0.079568 | -5.07355 | 1.190842 | 6.264396 | 0.213657 | 0.325938 | 0.201803 |         |
| RP11-117D22.1__lin  | 0        | 0        | 0        | 0        | 3.79871  | 4.25955  | 0        | 0        | 0        | #NUM!    | #DIV/0!  | #DIV/0!  | 0.184835 | #DIV/0!  | 0.184835 |         |
| RP11-117L5.4__linc  | 0        | 0        | 0        | 0        | 0        | 23.6573  | 0.99035  | 0.552977 | 1.04218  | #NUM!    | #NUM!    | 3.193766 | 0.42265  | 0.030914 | 0.462725 |         |
| RP11-118A3.1__linc  | 0        | 0        | 0        | 0        | 3.79871  | 1.7293   | 0.03933  | 0        | 0.130976 | #NUM!    | #NUM!    | 5.020562 | 0.235327 | 0.280998 | 0.249471 |         |
| RP11-118B18.1__lin  | 2.34905  | 1.45859  | 1.07677  | 1.42532  | 11.4581  | 714.898  | 2.17179  | 0.89531  | 0.69929  | -7.21918 | 0.375002 | 7.594179 | 0.415367 | 0.078997 | 0.414779 |         |
| RP11-118B18.2__lin  | 0        | 0        | 0        | 0.515388 | 0.355167 | 1.88846  | 1.25782  | 0        | 0.151055 | #NUM!    | #NUM!    | 0.96961  | 0.199331 | 0.357928 | 0.594532 |         |
| RP11-118E18.2__an   | 0        | 0        | 0        | 0        | 0        | 0        | 0.129149 | 0.288246 | 0        | #DIV/0!  | #NUM!    | #NUM!    | #DIV/0!  | 0.237048 | 0.237048 |         |
| RP11-118E18.4__an   | 0        | 0        | 0        | 0        | 0.047227 | 0.211309 | 0        | 0        | 0.024082 | #NUM!    | #NUM!    | 3.424367 | 0.310621 | 0.42265  | 0.298975 |         |
| RP11-118G23.1__lin  | 0        | 0        | 0        | 0        | 0        | 0        | 0        | 0        | 0        | #DIV/0!  | #DIV/0!  | #DIV/0!  | #DIV/0!  | #DIV/0!  | #DIV/0!  |         |
| RP11-118H17.1__an   | 0        | 0        | 0.230235 | 0        | 1.58601  | 20.8506  | 0.718276 | 0        | 0.049868 | -6.6066  | -1.73827 | 4.868334 | 0.380074 | 0.580648 | 0.400661 |         |
| RP11-118K6.2__linc  | 0        | 0        | 0        | 0        | 0        | 0        | 0        | 0        | 0.064807 | #DIV/0!  | #NUM!    | #NUM!    | #DIV/0!  | 0.42265  | 0.42265  |         |
| RP11-1191J2.2__an   | 0        | 0        | 1.48176  | 0        | 0        | 26.3811  | 0.499727 | 0        | 0        | -4.15412 | 1.5681   | 5.722221 | 0.42265  | 0.637427 | 0.433688 |         |
| RP11-1191J2.4__an   | 0        | 0        | 0        | 0        | 0        | 2.93567  | 0        | 0        | 0        | #NUM!    | #DIV/0!  | #DIV/0!  | 0.42265  | #DIV/0!  | 0.42265  |         |
| RP11-119D18.1__lin  | 0        | 0        | 0.339352 | 0        | 0        | 0        | 0.638244 | 0        | 0        | #DIV/0!  | -0.91133 | #NUM!    | 0.42265  | 0.761272 | 0.42265  |         |
| RP11-119D9.1__linc  | 1.40097  | 145.042  | 0.114997 | 2.70186  | 20.9943  | 4.50384  | 0.383174 | 0.075374 | 0.225281 | 2.377704 | 7.74362  | 5.365916 | 0.449506 | 0.41905  | 0.260321 |         |
| RP11-119F19.2__an   | 3.97199  | 36.6312  | 38.7632  | 32.6562  | 15.1908  | 54.1946  | 58.4806  | 4.08103  | 68.4998  | -0.36256 | -0.72364 | -0.36109 | 0.664276 | 0.574276 | 0.468834 |         |
| RP11-119F7.5__sen   | 1.93865  | 0.076409 | 0.097098 | 0        | 7.79498  | 5.88033  | 0.126519 | 0.971094 | 0.07023  | -2.69479 | 0.854871 | 3.549656 | 0.321388 | 0.730251 | 0.19435  |         |
| RP11-120C12.3__lin  | 0.01502  | 0.070851 | 0.078937 | 0        | 0.192603 | 4.74695  | 1.16326  | 0        | 0.04905  | -4.90553 | -2.8789  | 2.026622 | 0.409653 | 0.474479 | 0.555719 |         |
| RP11-120E13.1__lin  | 0        | 0        | 0        | 0        | 15.6815  | 14.5752  | 0.297281 | 0        | 0        | #NUM!    | #NUM!    | 6.669284 | 0.184049 | 0.42265  | 0.192144 |         |
| RP11-120M18.2__pr   | 53.0904  | 34.8316  | 19.8286  | 36.5586  | 31.0887  | 207.45   | 8.67866  | 36.0851  | 37.7439  | -1.35225 | 0.385096 | 1.737342 | 0.487128 | 0.695775 | 0.353738 |         |

|                     |          |          |          |          |          |         |          |          |          |          |          |          |          |          |          |
|---------------------|----------|----------|----------|----------|----------|---------|----------|----------|----------|----------|----------|----------|----------|----------|----------|
| RP11-1212A22.1__p   | 5.63276  | 0        | 1.55757  | 8.72223  | 16.1099  | 6.84006 | 0        | 22.4583  | 10.7583  | -2.13909 | -2.20777 | -0.06869 | 0.179797 | 0.396898 | 0.922312 |
| RP11-1212C2.2__linc | 1.32323  | 1.31374  | 0.611299 | 0.776061 | 0.676883 | 0.16459 | 0.95603  | 1.0131   | 1.11508  | 1.005875 | 0.07477  | -0.9311  | 0.010054 | 0.863144 | 0.173173 |
| RP11-121G22.3__lin  | 0        | 0        | 0        | 0        | 31.5562  | 2.45577 | 0        | 0.818493 | 0        | #NUM!    | #NUM!    | 5.376929 | 0.379595 | 0.42265  | 0.378503 |
| RP11-121J20.1__linc | 0        | 0        | 0        | 0.362633 | 0.041622 | 0       | 0.076683 | 0        | 0        | #NUM!    | #NUM!    | 2.398291 | 0.360581 | 0.42265  | 0.345509 |
| RP11-121M22.1__lin  | 0        | 0        | 2.07754  | 2.80229  | 285.253  | 126.717 | 2.88477  | 0.078208 | 0        | -7.6413  | -0.51217 | 7.129128 | 0.234616 | 0.856235 | 0.238103 |
| RP11-122C5.1__linc  | 0        | 0        | 0.084967 | 0        | 6.43972  | 8.61012 | 0.780353 | 0        | 0.184121 | -7.46863 | -3.50477 | 3.963862 | 0.191318 | 0.35448  | 0.235246 |
| RP11-122G18.5__lin  | 0        | 2.30208  | 0.96541  | 0        | 11.4052  | 3.25586 | 1.20278  | 0        | 5.52469  | -2.16573 | -1.04188 | 1.123853 | 0.299224 | 0.619299 | 0.608197 |
| RP11-122K13.14__li  | 0        | 0        | 0        | 0        | 0.388261 | 1.46677 | 0.05121  | 0        | 0        | #NUM!    | #NUM!    | 5.178882 | 0.294133 | 0.42265  | 0.31401  |
| RP11-122K13.7__an   | 25.5771  | 47.113   | 7.92356  | 8.99205  | 13.0006  | 10.5761 | 41.0906  | 27.29    | 23.4612  | 1.307536 | -0.18813 | -1.49566 | 0.270476 | 0.780854 | 0.08557  |
| RP11-122M14.1__ar   | 0.079092 | 0.05804  | 1.04749  | 0.176539 | 4.27379  | 11.0127 | 0        | 503.176  | 0.071409 | -3.70632 | -8.7307  | -5.02437 | 0.23816  | 0.423862 | 0.435651 |
| RP11-122M14.3__lin  | 0        | 0        | 0.958329 | 0        | 90.8899  | 17.4485 | 1.38642  | 0        | 0        | -6.82081 | -0.53277 | 6.288037 | 0.328858 | 0.853353 | 0.332878 |
| RP11-123B3.2__anti  | 3.94959  | 5.84314  | 2.94798  | 31.3395  | 37.5408  | 86.2914 | 6.54036  | 3.0244   | 5.43371  | -3.60635 | -0.23537 | 3.370978 | 0.118429 | 0.714433 | 0.114052 |
| RP11-123O10.3__lin  | 0        | 0        | 0        | 0        | 0        | 11.3056 | 0        | 0        | 0        | #NUM!    | #DIV/0!  | #DIV/0!  | 0.42265  | #DIV/0!  | 0.42265  |
| RP11-123O10.4__lin  | 2.25714  | 12.3544  | 1.64609  | 25.5972  | 55.8989  | 189.071 | 11.9239  | 9.07345  | 1.07999  | -4.0568  | -0.44145 | 3.615348 | 0.242492 | 0.671362 | 0.261312 |
| RP11-124O11.1__lin  | 0.017785 | 0.062921 | 0.269771 | 1.32879  | 0.341454 | 1.24517 | 0.231795 | 0.058275 | 0.038694 | -3.05631 | 0.092269 | 3.14858  | 0.106633 | 0.960201 | 0.097666 |
| RP11-124O11.2__lin  | 0        | 0        | 0.545903 | 0        | 2.77874  | 0       | 0        | 0        | 0        | -2.34771 | #DIV/0!  | #DIV/0!  | 0.544776 | 0.42265  | 0.42265  |
| RP11-125O18.1__lin  | 0        | 0.072077 | 1.17228  | 0        | 163.599  | 167.196 | 0.662577 | 0        | 0        | -8.05439 | 0.90924  | 8.963634 | 0.183527 | 0.750915 | 0.18519  |
| RP11-125P18.1__lin  | 0        | 0        | 0.052233 | 1.03393  | 12.442   | 374.648 | 0        | 0        | 0        | -12.8593 | #DIV/0!  | #DIV/0!  | 0.402212 | 0.42265  | 0.402215 |
| RP11-126O13.4__p    | 0        | 0        | 0        | 1.40566  | 0        | 1.16354 | 0.317458 | 0        | 0        | #NUM!    | #NUM!    | 3.016682 | 0.187105 | 0.42265  | 0.18396  |
| RP11-126O1.4__ant   | 15.2345  | 6.17965  | 8.84901  | 20.7059  | 5.25333  | 13.181  | 9.42345  | 9.83762  | 10.321   | -0.37109 | 0.03284  | 0.403929 | 0.271983 | 0.944005 | 0.558865 |
| RP11-127I20.7__pro  | 1.3455   | 0.688616 | 2.66411  | 0.657596 | 4.70497  | 9.27549 | 0.972814 | 1.20143  | 1.31233  | -1.63954 | 0.430306 | 2.069842 | 0.261064 | 0.531462 | 0.260433 |
| RP11-127O4.2__linc  | 0        | 0        | 0.368331 | 0        | 0        | 0       | 0        | 0        | 0        | #DIV/0!  | #DIV/0!  | #DIV/0!  | 0.42265  | 0.42265  | #DIV/0!  |
| RP11-127O4.3__linc  | 0        | 0        | 0        | 0        | 0.034103 | 1.75602 | 0.156883 | 0        | 0        | #NUM!    | #NUM!    | 3.512298 | 0.411548 | 0.42265  | 0.465248 |
| RP11-128P17.2__lin  | 0.05227  | 0        | 0.521354 | 0.06858  | 2.28441  | 3.97108 | 0        | 0        | 0        | -3.46268 | #DIV/0!  | #DIV/0!  | 0.197589 | 0.367935 | 0.203104 |
| RP11-128P17.3__lin  | 0        | 0        | 0        | 0        | 5.05569  | 28.5796 | 0        | 0        | 0        | #NUM!    | #DIV/0!  | #DIV/0!  | 0.330906 | #DIV/0!  | 0.330906 |
| RP11-129B22.1__an   | 0        | 0        | 0        | 0        | 1962.19  | 9.66173 | 0        | 0        | 0        | #NUM!    | #DIV/0!  | #DIV/0!  | 0.419814 | #DIV/0!  | 0.419814 |
| RP11-129I19.2__linc | 0        | 0        | 0        | 0        | 0        | 1.21997 | 0.551056 | 0        | 0        | #NUM!    | #NUM!    | 1.146575 | 0.42265  | 0.42265  | 0.711503 |
| RP11-129J12.2__an   | 0.190534 | 0.337226 | 0        | 0.500735 | 3.47405  | 3.09845 | 0.74189  | 0.723698 | 0.741219 | -3.74442 | -2.06401 | 1.68041  | 0.145013 | 0.031937 | 0.226062 |
| RP11-12C17.2__anti  | 0.058591 | 0        | 0.23428  | 0.116177 | 1.64888  | 3.44111 | 0.085888 | 0.57466  | 0.158925 | -4.15189 | -1.48443 | 2.667454 | 0.213421 | 0.476004 | 0.266669 |
| RP11-12L8.1__lincR  | 0.012567 | 0.014819 | 0.364894 | 0.189809 | 0.116492 | 3.37906 | 0.207516 | 0        | 0.191616 | -3.23185 | -0.02498 | 3.206868 | 0.370669 | 0.984856 | 0.405163 |
| RP11-12M5.1__lincF  | 0        | 0        | 0        | 0        | 2.457    | 2.49994 | 0        | 0        | 0        | #NUM!    | #DIV/0!  | #DIV/0!  | 0.183534 | #DIV/0!  | 0.183534 |
| RP11-12M5.4__lincF  | 0        | 0        | 0        | 2.39756  | 0        | 0       | 0.854753 | 0        | 0        | #NUM!    | #NUM!    | 1.487987 | 0.42265  | 0.42265  | 0.42265  |
| RP11-12M9.3__psev   | 56.7731  | 39.9506  | 11.4835  | 16.3951  | 11.2963  | 6.11269 | 28.3646  | 46.1018  | 32.5148  | 1.678527 | 0.016439 | -1.66209 | 0.137461 | 0.980271 | 0.067281 |
| RP11-130F10.1__an   | 0.083063 | 0.03265  | 1.4279   | 0.018393 | 8.6326   | 899.74  | 0.13574  | 3.21079  | 0.04522  | -9.20086 | -1.13572 | 8.06514  | 0.417191 | 0.692171 | 0.419256 |
| RP11-131J3.1__lincI | 0.442091 | 0.021134 | 0.239284 | 1.91412  | 0.264183 | 0.31479 | 4.34629  | 0.124121 | 0.060738 | -1.82735 | -2.68929 | -0.86194 | 0.307975 | 0.434611 | 0.51961  |

|                     |          |          |          |          |          |          |          |          |          |          |          |          |          |          |          |
|---------------------|----------|----------|----------|----------|----------|----------|----------|----------|----------|----------|----------|----------|----------|----------|----------|
| RP11-131L23.1__an   | 5.93188  | 8.5291   | 6.5551   | 4.74313  | 2.81506  | 177.814  | 4.94252  | 8.96573  | 8.58267  | -3.14086 | -0.09785 | 3.04301  | 0.446242 | 0.629451 | 0.444681 |
| RP11-132N15.1__lin  | 0.098581 | 0        | 0.226038 | 0.085343 | 0.377278 | 5.28267  | 0.284013 | 0        | 0.035034 | -4.14556 | 0.024978 | 4.170539 | 0.382802 | 0.987916 | 0.40496  |
| RP11-132N15.3__lin  | 0        | 0        | 0.336385 | 0        | 0        | 7.7354   | 0.118867 | 0        | 0        | -4.52329 | 1.500765 | 6.024056 | 0.42265  | 0.647996 | 0.431589 |
| RP11-1336O20.2__a   | 0.027044 | 0        | 0.067689 | 15.6428  | 0.101204 | 73.2715  | 0.013259 | 0.044345 | 0        | -9.87597 | 0.717704 | 10.59367 | 0.314124 | 0.738855 | 0.31447  |
| RP11-133F8.2__linc  | 0.924275 | 0        | 2.26789  | 1.14908  | 70.7841  | 58.0879  | 0.682664 | 0        | 0        | -5.34807 | 2.225288 | 7.573354 | 0.18771  | 0.364736 | 0.184507 |
| RP11-133L14.5__an   | 0.351809 | 0.034227 | 0.038762 | 0.012873 | 2.66782  | 63.8248  | 0.056974 | 0.031755 | 0.042181 | -7.29055 | 1.698214 | 8.988764 | 0.402398 | 0.42456  | 0.3997   |
| RP11-1348G14.4__li  | 0.093804 | 1.3077   | 0.390025 | 1.48536  | 5.55314  | 3.58965  | 0.41169  | 0        | 2.07717  | -2.56863 | -0.47429 | 2.094334 | 0.071594 | 0.813449 | 0.197362 |
| RP11-134D3.1__pro   | 0.007089 | 0.025077 | 0.163346 | 0        | 0.212768 | 1.8962   | 0.090497 | 0        | 0.038655 | -3.43121 | 0.598198 | 4.029404 | 0.366189 | 0.748098 | 0.389358 |
| RP11-134F2.2__anti  | 155.149  | 1.20246  | 6.56749  | 10.0112  | 4.21733  | 25.6659  | 1.02019  | 0.016876 | 0.061634 | 2.029895 | 7.212213 | 5.182317 | 0.514901 | 0.394396 | 0.184319 |
| RP11-134G8.7__ant   | 33.858   | 18.5609  | 14.8383  | 10.6586  | 15.2844  | 32.271   | 6.21697  | 21.7729  | 17.1303  | 0.208323 | 0.575916 | 0.367594 | 0.821217 | 0.542255 | 0.556894 |
| RP11-134P9.1__linc  | 17.6209  | 7.4047   | 4.39924  | 10.976   | 4.89658  | 6.46886  | 4.85263  | 16.7568  | 15.0464  | 0.397312 | -0.31701 | -0.71432 | 0.447193 | 0.781136 | 0.479116 |
| RP11-135J2.3__lincf | 33.5572  | 73.4746  | 1.48587  | 3.3603   | 4.46438  | 11.9827  | 13.4375  | 0        | 97.2744  | 2.45382  | -0.02888 | -2.4827  | 0.326586 | 0.989649 | 0.38973  |
| RP11-135J2.4__anti: | 0        | 0.815122 | 8.51687  | 2.85053  | 91.5996  | 52.5557  | 0        | 13.3278  | 9.37876  | -3.97754 | -1.28285 | 2.694692 | 0.21256  | 0.38434  | 0.197594 |
| RP11-135L13.4__an   | 0        | 0        | 0        | 0        | 0        | 0        | 0        | 0        | 0        | #DIV/0!  | #DIV/0!  | #DIV/0!  | #DIV/0!  | #DIV/0!  | #DIV/0!  |
| RP11-136H19.1__an   | 6.40453  | 10.8153  | 2.48715  | 2.44647  | 27.2027  | 4.68391  | 1.43286  | 3.8746   | 9.80349  | -0.80089 | 0.383112 | 1.184005 | 0.503305 | 0.763998 | 0.535745 |
| RP11-136I14.2__linc | 0        | 0        | 0        | 0        | 0        | 1.16927  | 0        | 0        | 0        | #NUM!    | #DIV/0!  | #DIV/0!  | 0.42265  | #DIV/0!  | 0.42265  |
| RP11-136I14.5__linc | 0        | 0        | 0.326352 | 0.154332 | 2.30505  | 0        | 0.808638 | 0.514916 | 0        | -2.9138  | -2.01992 | 0.893879 | 0.47217  | 0.431479 | 0.655937 |
| RP11-136K7.2__linc  | 0.19636  | 0        | 0.152368 | 0.022025 | 7.30769  | 38.1354  | 0.60964  | 0.022123 | 0.030739 | -7.02651 | -0.92582 | 6.10069  | 0.326578 | 0.580044 | 0.333319 |
| RP11-137H2.4__anti  | 0.279911 | 0.491678 | 0.390716 | 1.05386  | 0.534785 | 0.71287  | 0.844244 | 0.174197 | 0.280973 | -0.9856  | -0.16087 | 0.824723 | 0.216462 | 0.879466 | 0.036394 |
| RP11-137H2.6__linc  | 2.26342  | 1.51134  | 7.70233  | 1.91368  | 3.49097  | 11.7706  | 1.01676  | 1.50455  | 2.13001  | -0.58157 | 1.303045 | 1.884619 | 0.275023 | 0.309841 | 0.268436 |
| RP11-137L10.6__prc  | 0        | 0        | 0        | 0        | 136.332  | 191.53   | 0        | 0        | 2.37822  | #NUM!    | #NUM!    | 7.107063 | 0.194835 | 0.42265  | 0.194047 |
| RP11-137N23.1__ps   | 286.603  | 311.692  | 316.443  | 71.3235  | 122.701  | 164.582  | 44.5538  | 38.08    | 28.6682  | 1.350957 | 3.038879 | 1.687922 | 0.009705 | 0.002537 | 0.120407 |
| RP11-138A23.2__lin  | 0        | 0        | 0.330152 | 0.779234 | 1.72639  | 2.70412  | 0.25709  | 0        | 0.142645 | -3.98001 | -0.27591 | 3.704097 | 0.072362 | 0.873749 | 0.113543 |
| RP11-138C9.1__anti  | 0        | 0        | 0        | 0        | 0        | 0        | 0        | 0        | 0        | #DIV/0!  | #DIV/0!  | #DIV/0!  | #DIV/0!  | #DIV/0!  | #DIV/0!  |
| RP11-138E9.2__linc  | 0        | 0        | 2.68807  | 0        | 44.4125  | 112.843  | 0        | 0        | 0        | -5.8704  | #DIV/0!  | #DIV/0!  | 0.248643 | 0.42265  | 0.251317 |
| RP11-138I17.1__linc | 0.036643 | 0        | 0.612622 | 13.0308  | 12.8644  | 379.204  | 0.102297 | 0        | 0        | -9.28525 | 2.666043 | 11.9513  | 0.383934 | 0.487459 | 0.384091 |
| RP11-139B1.1__linc  | 0        | 0        | 0        | 0.658732 | 0        | 0        | 0.326653 | 0        | 0.181198 | #NUM!    | #NUM!    | 0.375286 | 0.42265  | 0.215064 | 0.769729 |
| RP11-139H15.1__an   | 1.45137  | 1.12601  | 0        | 0        | 0        | 3.12593  | 1.15917  | 1.58925  | 0        | -0.27838 | -0.0927  | 0.185683 | 0.91265  | 0.8197   | 0.940987 |
| RP11-139I14.2__linc | 0.015394 | 0.066553 | 0.123399 | 0.177771 | 1.68989  | 12.3051  | 0.156268 | 0.016856 | 0.050385 | -6.10892 | -0.12228 | 5.986642 | 0.343874 | 0.936932 | 0.348857 |
| RP11-139J15.5__linc | 0        | 0.081537 | 0        | 0.270423 | 2.90896  | 0        | 0.401612 | 0        | 0.297098 | -5.28515 | -3.09917 | 2.185981 | 0.370304 | 0.296036 | 0.510693 |
| RP11-139K4.1__linc  | 0.0168   | 0.019813 | 0.100887 | 0.0223   | 0.269101 | 13.7417  | 0.672633 | 0        | 0.05484  | -6.67326 | -2.40346 | 4.269796 | 0.411964 | 0.482138 | 0.439472 |
| RP11-13A1.1__lincR  | 0.047228 | 0.041768 | 0.049993 | 0.094185 | 0        | 0.057438 | 0.101109 | 0.025822 | 0.025723 | -0.12552 | -0.1353  | -0.00978 | 0.884736 | 0.871102 | 0.985651 |
| RP11-13A1.3__lincR  | 0        | 0        | 0.799915 | 2.37575  | 7.91479  | 21.9843  | 0        | 0        | 0        | -5.33442 | #DIV/0!  | #DIV/0!  | 0.200845 | 0.42265  | 0.2066   |
| RP11-13G14.4__ant   | 0        | 0        | 0.86947  | 0        | 12.4507  | 62.5282  | 0        | 0        | 0        | -6.4302  | #DIV/0!  | #DIV/0!  | 0.319795 | 0.42265  | 0.321017 |
| RP11-13J10.1__sen:  | 0        | 0.267244 | 0.164298 | 0        | 2.9619   | 73.1973  | 1.19284  | 0.151351 | 0.335493 | -7.46337 | -1.96062 | 5.502757 | 0.401755 | 0.404756 | 0.410349 |

|                     |          |          |          |          |          |          |          |          |          |          |          |          |          |          |          |
|---------------------|----------|----------|----------|----------|----------|----------|----------|----------|----------|----------|----------|----------|----------|----------|----------|
| RP11-13K12.2__linc  | 0.013001 | 0.030657 | 0.188855 | 0.086572 | 91.5996  | 72.9495  | 0.113123 | 0        | 0.035447 | -9.46775 | 0.646163 | 10.11391 | 0.188436 | 0.739071 | 0.188851 |
| RP11-13N13.2__linc  | 2.17936  | 2.80583  | 4.35499  | 0.883337 | 4.70497  | 66.4673  | 1.44968  | 1.23779  | 2.77662  | -2.94759 | 0.773469 | 3.721058 | 0.417443 | 0.044245 | 0.39727  |
| RP11-140I24.1__linc | 0        | 0        | 0.126919 | 0.112376 | 21.0334  | 11.245   | 0.943764 | 0        | 0.034524 | -7.99553 | -2.94635 | 5.04918  | 0.217045 | 0.481651 | 0.239545 |
| RP11-140M13.1__lin  | 0        | 0        | 0        | 0        | 0        | 43.9184  | 1.39898  | 0        | 0        | #NUM!    | #NUM!    | 4.972378 | 0.42265  | 0.42265  | 0.441324 |
| RP11-1415C14.3__p   | 0.167215 | 0.079469 | 0.157325 | 0.324224 | 0.487383 | 0.245181 | 0.585351 | 0.209198 | 0.255989 | -1.38723 | -1.37867 | 0.008558 | 0.154651 | 0.168244 | 0.990546 |
| RP11-141A19.2__an   | 0        | 0        | 0        | 0        | 2.87849  | 0        | 0        | 0        | 0        | #NUM!    | #DIV/0!  | #DIV/0!  | 0.42265  | #DIV/0!  | 0.42265  |
| RP11-141M1.3__linc  | 1.387    | 11.2479  | 4.40112  | 10.3244  | 177.245  | 158.398  | 5.29422  | 3.18146  | 0.401775 | -4.34398 | 0.94037  | 5.284346 | 0.161941 | 0.520073 | 0.172293 |
| RP11-141M3.5__pro   | 3.00819  | 3.20674  | 1.72644  | 2.71066  | 5.96595  | 5.98738  | 1.06181  | 0.66478  | 0.172906 | -0.88482 | 2.063771 | 2.948589 | 0.236717 | 0.019753 | 0.083297 |
| RP11-141O11.1__lin  | 0        | 0        | 1.24891  | 2.30159  | 2.54575  | 6.45729  | 1.2919   | 0        | 0.97433  | -3.17817 | -0.85962 | 2.318548 | 0.069219 | 0.555293 | 0.148568 |
| RP11-142C4.6__anti  | 16.0832  | 0        | 0.73911  | 0.209136 | 18.9253  | 585.014  | 0.767676 | 0.61758  | 0.233723 | -5.16646 | 3.37722  | 8.543675 | 0.420153 | 0.427655 | 0.405418 |
| RP11-142G1.2__linc  | 0        | 0.044265 | 0.479165 | 0.16228  | 0.712514 | 1.14718  | 0.239561 | 0        | 0.099757 | -1.9497  | 0.62536  | 2.575055 | 0.097558 | 0.764249 | 0.234542 |
| RP11-142I20.1__linc | 0.148383 | 0.063082 | 0.482743 | 0        | 23.3996  | 12.8609  | 0        | 0.128677 | 0.038792 | -5.70689 | 2.051474 | 7.758362 | 0.222676 | 0.356601 | 0.215707 |
| RP11-142L1.1__lincl | 0.120214 | 0        | 0        | 0        | 0        | 13.9801  | 0        | 0        | 0        | -6.86163 | #DIV/0!  | #DIV/0!  | 0.427635 | 0.42265  | 0.42265  |
| RP11-142L4.3__pse   | 16.2542  | 16.5617  | 12.9126  | 17.1622  | 6.08455  | 345.829  | 7.4251   | 37.0451  | 17.8994  | -3.01275 | -0.44775 | 2.565002 | 0.439524 | 0.579638 | 0.462641 |
| RP11-143A12.3__lin  | 0        | 0        | 0.343028 | 0.412429 | 5.38308  | 115.125  | 1.56564  | 0        | 0.082366 | -8.46152 | -2.26432 | 6.197194 | 0.394168 | 0.525306 | 0.402106 |
| RP11-143E21.6__lin  | 1.145    | 0.049451 | 0        | 1.55126  | 0.044326 | 5.90416  | 0.122552 | 0.760452 | 0.181384 | -2.65049 | 0.166324 | 2.816818 | 0.384879 | 0.940332 | 0.374685 |
| RP11-143K11.1__lin  | 0.194074 | 0.196212 | 0.194034 | 0        | 0.176886 | 3.09536  | 0.162622 | 0        | 0.180551 | -2.48545 | 0.767823 | 3.253273 | 0.46632  | 0.300981 | 0.421786 |
| RP11-143K11.5__pri  | 0.215403 | 0.080816 | 3.87393  | 25.6584  | 2.94801  | 4.19417  | 2.32387  | 6.57843  | 7.24688  | -2.97555 | -1.95329 | 1.02226  | 0.354458 | 0.092196 | 0.596263 |
| RP11-143P4.2__linc  | 3.19818  | 3.75423  | 2.7058   | 4.35477  | 19.7037  | 1.60978  | 0.948454 | 2.71293  | 4.69368  | -1.41016 | 0.209105 | 1.619262 | 0.423328 | 0.763228 | 0.432095 |
| RP11-144G16.1__an   | 0        | 0        | 0        | 0        | 0        | 1.80631  | 0        | 0        | 0        | #NUM!    | #DIV/0!  | #DIV/0!  | 0.42265  | #DIV/0!  | 0.42265  |
| RP11-144G7.2__ant   | 0        | 0        | 0.406336 | 0        | 23.3512  | 8.03212  | 0.851513 | 0        | 0        | -6.27118 | -1.06736 | 5.203826 | 0.271944 | 0.727584 | 0.286585 |
| RP11-144L1.4__anti  | 0        | 0        | 4.41624  | 2.05174  | 0.036559 | 2.93567  | 0.122893 | 0        | 0        | -0.18601 | 5.167344 | 5.353353 | 0.861339 | 0.438933 | 0.194484 |
| RP11-145A3.1__anti  | 0.296419 | 0.190067 | 3.31062  | 10.1397  | 50.8012  | 34.2075  | 1.05024  | 0.32177  | 0.112845 | -4.64721 | 1.354578 | 6.001785 | 0.122554 | 0.593992 | 0.121979 |
| RP11-145A3.2__sen   | 0        | 0        | 0        | 1.17396  | 4.28423  | 302.91   | 2.25595  | 0        | 0        | #NUM!    | #NUM!    | 7.094775 | 0.41231  | 0.42265  | 0.416608 |
| RP11-145G20.1__lin  | 0.004359 | 0.034145 | 0.047471 | 23.3258  | 170.785  | 73.2715  | 0.070831 | 0.008564 | 0.046787 | -11.6027 | -0.55351 | 11.04918 | 0.175829 | 0.674095 | 0.176021 |
| RP11-145M4.2__linc  | 0        | 0        | 0.625625 | 0        | 1962.19  | 13.4307  | 0.899542 | 0        | 0        | -11.6247 | -0.52389 | 11.10083 | 0.418894 | 0.855668 | 0.418976 |
| RP11-145M4.3__linc  | 0        | 0        | 0        | 0        | 0        | 1.15065  | 0        | 0        | 0        | #NUM!    | #DIV/0!  | #DIV/0!  | 0.42265  | #DIV/0!  | 0.42265  |
| RP11-146F11.5__an   | 1.59769  | 1.44209  | 0.873579 | 1.93313  | 6.43077  | 12.2651  | 0.799013 | 0.506402 | 2.01096  | -2.39819 | 0.2388   | 2.636995 | 0.224245 | 0.794279 | 0.159814 |
| RP11-146N18.1__lin  | 1.45259  | 0        | 0.82587  | 0        | 152.22   | 476.842  | 0.086676 | 0        | 0        | -8.109   | 4.716281 | 12.82528 | 0.275911 | 0.207214 | 0.274518 |
| RP11-147G16.1__lin  | 0        | 0        | 0        | 0        | 4.34969  | 15.1102  | 0.102996 | 0        | 0.057157 | #NUM!    | #NUM!    | 6.924913 | 0.285467 | 0.215025 | 0.288879 |
| RP11-147I3.1__pseu  | 1.94791  | 16.7068  | 2.16345  | 9.51653  | 414.307  | 22.7602  | 4.31621  | 23.0055  | 62.3993  | -4.42302 | -2.1076  | 2.315413 | 0.382691 | 0.343661 | 0.47619  |
| RP11-147N17.1__an   | 0.980561 | 0.015992 | 3.00965  | 6.56604  | 12.3889  | 85.4834  | 1.34956  | 0        | 7.90621  | -4.70427 | -1.20812 | 3.496155 | 0.306269 | 0.38278  | 0.302027 |
| RP11-148B18.4__lin  | 0        | 0        | 0.124154 | 0        | 0.130742 | 8.0904   | 0.120905 | 0        | 0        | -6.04914 | 0.038257 | 6.087393 | 0.413253 | 0.989176 | 0.422088 |
| RP11-148B6.2__linc  | 0        | 0.043219 | 0.329371 | 0        | 0.388227 | 10.391   | 0.035746 | 0        | 0        | -4.85452 | 3.38172  | 8.23624  | 0.403203 | 0.417929 | 0.403485 |
| RP11-148L24.1__lin  | 3.1001   | 0        | 0.94495  | 0.031231 | 10.1722  | 43.632   | 0.161513 | 0.15552  | 0.128093 | -3.73433 | 3.183872 | 6.918198 | 0.346515 | 0.319438 | 0.309514 |

|                     |          |          |          |          |          |          |          |          |          |          |          |          |          |          |          |
|---------------------|----------|----------|----------|----------|----------|----------|----------|----------|----------|----------|----------|----------|----------|----------|----------|
| RP11-14C22.3__linc  | 0        | 0        | 0        | 0        | 0        | 2.09468  | 0        | 0        | 0        | #NUM!    | #DIV/0!  | #DIV/0!  | 0.42265  | #DIV/0!  | 0.42265  |
| RP11-14C22.6__linc  | 0        | 0        | 0        | 0        | 0        | 0        | 0        | 0        | 0        | #DIV/0!  | #DIV/0!  | #DIV/0!  | #DIV/0!  | #DIV/0!  | #DIV/0!  |
| RP11-14D22.1__linc  | 0.403501 | 0.344803 | 0        | 0.145458 | 0.787532 | 0.441842 | 0.214785 | 0.119741 | 0.20072  | -0.87756 | 0.483422 | 1.360981 | 0.465395 | 0.654222 | 0.320496 |
| RP11-14J7.6__antis  | 0.017204 | 0        | 0.034436 | 0        | 1.67226  | 5.61788  | 0.254096 | 0        | 0        | -7.14132 | -2.29882 | 4.842501 | 0.282982 | 0.511708 | 0.307607 |
| RP11-14N7.2__lincR  | 5.36638  | 13.8428  | 29.7397  | 12.5239  | 15.4001  | 18.8016  | 24.1987  | 9.66255  | 2.82751  | 0.067063 | 0.415938 | 0.348875 | 0.902493 | 0.786228 | 0.718711 |
| RP11-14O19.2__linc  | 0        | 0        | 2.39112  | 0        | 9.2223   | 41.7701  | 0.053044 | 0        | 0.137432 | -4.41452 | 3.650008 | 8.064532 | 0.30621  | 0.436395 | 0.312167 |
| RP11-150C16.1__an   | 7.29393  | 2.19623  | 8.36702  | 4.567    | 6.65057  | 1161.52  | 4.21523  | 14.1631  | 3.42809  | -6.03723 | -0.28825 | 5.748983 | 0.421791 | 0.828655 | 0.426232 |
| RP11-151A6.4__sen   | 0.527328 | 0.710661 | 0.263996 | 1.14813  | 5.65124  | 22.8813  | 6.04866  | 0.205912 | 0.505961 | -4.30458 | -2.17027 | 2.134315 | 0.297508 | 0.452932 | 0.43795  |
| RP11-151E14.1__lin  | 0        | 0.047906 | 1.16643  | 0.017994 | 0.115829 | 0.272242 | 0.092951 | 0.074015 | 0.029491 | 1.580387 | 2.627888 | 1.047501 | 0.479727 | 0.484963 | 0.52999  |
| RP11-152C17.1__lin  | 0        | 0        | 0        | 0        | 0        | 0        | 0        | 0        | 0        | #DIV/0!  | #DIV/0!  | #DIV/0!  | #DIV/0!  | #DIV/0!  | #DIV/0!  |
| RP11-152F13.3__ps   | 0.983148 | 0.700717 | 1.21913  | 2.11281  | 1.77853  | 1.27458  | 0.380061 | 1.26369  | 2.09895  | -0.83148 | -0.36654 | 0.464946 | 0.163752 | 0.598048 | 0.586406 |
| RP11-152F13.7__ps   | 1.80114  | 0.823526 | 1.19971  | 2.34465  | 0.588995 | 3.45368  | 0.532023 | 1.96342  | 2.35416  | -0.73999 | -0.34264 | 0.397345 | 0.365038 | 0.712635 | 0.648614 |
| RP11-152K4.2__anti  | 2.04134  | 3.46349  | 1.93282  | 37.5141  | 4.63911  | 36.4713  | 2.01959  | 1.38113  | 0.904226 | -3.40206 | 0.788852 | 4.190912 | 0.170101 | 0.221291 | 0.147859 |
| RP11-152L20.3__an   | 2.82855  | 4.20875  | 1.62651  | 2.22155  | 104.361  | 183.916  | 1.17201  | 1.25937  | 5.096    | -5.06739 | 0.202854 | 5.270239 | 0.217672 | 0.864596 | 0.208524 |
| RP11-152L7.1__lincl | 0        | 0        | 0        | 0        | 0        | 7.02036  | 0        | 0        | 0        | #NUM!    | #DIV/0!  | #DIV/0!  | 0.42265  | #DIV/0!  | 0.42265  |
| RP11-152L7.2__lincl | 0.017627 | 0        | 1.47316  | 0.046782 | 31.7008  | 2.6678   | 0.155428 | 0.019254 | 0.019177 | -4.52891 | 2.943    | 7.471907 | 0.400787 | 0.487355 | 0.378534 |
| RP11-152N13.5__an   | 0        | 0        | 0        | 0        | 4.12103  | 130.283  | 0        | 0        | 0        | #NUM!    | #DIV/0!  | #DIV/0!  | 0.404685 | #DIV/0!  | 0.404685 |
| RP11-153K11.3__lin  | 0        | 0        | 0        | 0        | 7.85273  | 16.7206  | 0.786609 | 0        | 0        | #NUM!    | #NUM!    | 4.965303 | 0.231983 | 0.42265  | 0.257241 |
| RP11-153K16.1__lin  | 0        | 0.066523 | 1.0255   | 0        | 34.1393  | 17.1711  | 1.13997  | 0        | 0        | -5.55418 | -0.06199 | 5.492184 | 0.231032 | 0.981964 | 0.242352 |
| RP11-153K16.2__lin  | 0        | 0.055578 | 0        | 0        | 11.5915  | 37.9507  | 2.16786  | 0        | 0        | -9.79993 | -5.28562 | 4.514314 | 0.279694 | 0.437636 | 0.311748 |
| RP11-153M3.1__pse   | 18.9336  | 8.23297  | 14.1192  | 5.20761  | 3.24668  | 54.8608  | 14.6296  | 5.65822  | 12.4896  | -0.6169  | 0.332942 | 0.949847 | 0.70613  | 0.068486 | 0.59444  |
| RP11-154H17.1__lin  | 0        | 0        | 2.69606  | 0        | 9.11732  | 13.4916  | 0.819746 | 0        | 0        | -3.06797 | 1.717604 | 4.785571 | 0.186388 | 0.615572 | 0.228412 |
| RP11-154H23.3__lin  | 0.84081  | 0.558513 | 0.361086 | 1.3554   | 0.205756 | 46.2304  | 0.800686 | 0.289165 | 0.104748 | -4.76277 | 0.559384 | 5.322157 | 0.420666 | 0.126523 | 0.416794 |
| RP11-154J22.1__an   | 7.71867  | 4.76518  | 4.88087  | 3.15761  | 2.76629  | 4.07231  | 3.44137  | 3.92567  | 3.65966  | 0.796706 | 0.655158 | -0.14155 | 0.156757 | 0.191636 | 0.528906 |
| RP11-155D18.12__p   | 10.0935  | 4.0612   | 2.75955  | 5.48289  | 1.85376  | 2.12561  | 6.00885  | 7.89197  | 10.8015  | 0.837982 | -0.54641 | -1.38439 | 0.164737 | 0.54116  | 0.168615 |
| RP11-155I9.1__lincF | 0        | 0        | 0.199503 | 0        | 1.58617  | 5.71592  | 0        | 0        | 0        | -5.19383 | #DIV/0!  | #DIV/0!  | 0.285587 | 0.42265  | 0.289292 |
| RP11-155L15.1__lin  | 0        | 0        | 0        | 0        | 0.109733 | 2.92557  | 0.151276 | 0        | 0        | #NUM!    | #NUM!    | 4.326586 | 0.401415 | 0.42265  | 0.432006 |
| RP11-156L14.1__an   | 0.196365 | 0        | 0.134652 | 8.78658  | 9.2805   | 101.398  | 1.18747  | 0        | 0.053294 | -8.49547 | -1.90625 | 6.589217 | 0.325996 | 0.47182  | 0.331157 |
| RP11-156P1.3__pro   | 3.42029  | 4.73939  | 1.8019   | 587.297  | 1032.98  | 35.4981  | 2.07963  | 2.59087  | 3.90675  | -7.37692 | 0.215859 | 7.592776 | 0.196732 | 0.757291 | 0.197732 |
| RP11-157F20.3__an   | 0        | 0        | 0        | 0        | 0        | 0        | 0        | 0        | 0        | #DIV/0!  | #DIV/0!  | #DIV/0!  | #DIV/0!  | #DIV/0!  | #DIV/0!  |
| RP11-157N3.1__linc  | 0        | 0.262639 | 0.965398 | 0        | 9.85379  | 3.7663   | 0.260198 | 0        | 0        | -3.47131 | 2.238672 | 5.709983 | 0.283954 | 0.45947  | 0.269034 |
| RP11-157P23.2__lin  | 0        | 0        | 0        | 0.041404 | 2.457    | 7.96893  | 0.015281 | 0        | 0.033937 | #NUM!    | #NUM!    | 7.732507 | 0.275313 | 0.236512 | 0.2759   |
| RP11-158I13.2__pro  | 19.5089  | 4.19856  | 5.92734  | 127.084  | 7.99012  | 40.2585  | 5.33701  | 9.13773  | 8.27827  | -2.56473 | 0.381235 | 2.945965 | 0.255482 | 0.738449 | 0.300205 |
| RP11-158I9.5__antis | 0.137765 | 0.02708  | 0.045933 | 0        | 0.464742 | 4.05944  | 0.692931 | 0.075159 | 0        | -4.42386 | -1.86555 | 2.558309 | 0.383524 | 0.424531 | 0.47575  |
| RP11-158J3.2__sen:  | 0        | 0.058543 | 0.074458 | 0        | 18.4446  | 7.44964  | 0        | 0        | 0.053909 | -7.60505 | 1.302852 | 8.907903 | 0.249209 | 0.264012 | 0.249253 |



|                     |          |          |          |          |          |          |          |          |          |          |          |          |          |          |          |
|---------------------|----------|----------|----------|----------|----------|----------|----------|----------|----------|----------|----------|----------|----------|----------|----------|
| RP11-158L12.5__lin  | 0        | 0        | 0        | 0        | 0        | 0        | 0.245595 | 0        | 0.068136 | #DIV/0!  | #NUM!    | #NUM!    | #DIV/0!  | 0.289317 | 0.289317 |
| RP11-159D12.10__li  | 0.019504 | 0.040244 | 5.37221  | 0.025991 | 3.08989  | 2.78473  | 2.80732  | 0.010679 | 7.46795  | -0.11939 | -0.92113 | -0.80174 | 0.932346 | 0.196504 | 0.595352 |
| RP11-159D23.2__lin  | 0.10227  | 0.120624 | 0.20454  | 0.203034 | 0.190466 | 0        | 0.325078 | 0        | 0.138819 | 0.119338 | -0.1181  | -0.23744 | 0.917844 | 0.919572 | 0.846865 |
| RP11-159H3.2__linc  | 0.020532 | 0.024211 | 0.07197  | 0        | 0.351694 | 0.167327 | 0.050369 | 0        | 0.145433 | -2.15283 | -0.74643 | 1.406397 | 0.320246 | 0.449223 | 0.475749 |
| RP11-159J3.1__pse   | 0        | 0        | 1.69118  | 3.67192  | 0.95559  | 0        | 0        | 0        | 0        | -1.45221 | #DIV/0!  | #DIV/0!  | 0.591896 | 0.42265  | 0.295853 |
| RP11-159N11.3__an   | 0.072981 | 0.034425 | 0.233789 | 0.174493 | 0.124799 | 4.41803  | 0.085857 | 0.095715 | 0.07945  | -3.7893  | 0.38643  | 4.175727 | 0.396491 | 0.722093 | 0.407121 |
| RP11-15A1.2__antis  | 2.40343  | 2.61739  | 2.25929  | 2.1702   | 5.06885  | 26.1728  | 0.736513 | 2.87567  | 1.9777   | -2.19833 | 0.381142 | 2.57947  | 0.372413 | 0.429376 | 0.339964 |
| RP11-15A1.7__antis  | 0        | 0        | 0        | 0        | 0        | 49.4162  | 0        | 0        | 0        | #NUM!    | #DIV/0!  | #DIV/0!  | 0.42265  | #DIV/0!  | 0.42265  |
| RP11-15B17.1__anti  | 20.2337  | 15.6666  | 20.8584  | 10.3678  | 11.6852  | 899.74   | 16.4417  | 18.7531  | 21.2667  | -4.02153 | 0.007574 | 4.029103 | 0.431788 | 0.965027 | 0.431319 |
| RP11-15F12.1__anti  | 0.724896 | 1.30022  | 0        | 1.94201  | 38.6024  | 200.636  | 0.465344 | 1.35188  | 0        | -6.89596 | 0.156268 | 7.052233 | 0.323413 | 0.546459 | 0.322799 |
| RP11-15I11.2__lincF | 0        | 0        | 0.688846 | 0        | 4.50062  | 13.5448  | 0        | 0        | 0.718983 | -4.71131 | -0.06178 | 4.649531 | 0.26431  | 0.42265  | 0.264051 |
| RP11-15K3.1__lincR  | 0.076482 | 0.078691 | 0.229167 | 0.352261 | 2.57862  | 15.0513  | 3.45551  | 0        | 0.180776 | -5.54804 | -3.24201 | 2.30603  | 0.324191 | 0.444571 | 0.462454 |
| RP11-15M15.1__ant   | 0        | 0.111397 | 0        | 6.46061  | 0.282193 | 6.47636  | 0.259044 | 0        | 0        | -6.89078 | -1.21749 | 5.67329  | 0.172869 | 0.697695 | 0.165938 |
| RP11-160C18.2__ps   | 0        | 0        | 1.33287  | 0        | 43.9205  | 44.9238  | 0        | 0        | 0.153495 | -6.05867 | 3.118273 | 9.176944 | 0.183509 | 0.42265  | 0.183541 |
| RP11-160H22.3__lin  | 0        | 5.29468  | 7.33114  | 5.27495  | 0        | 0        | 0        | 3.46971  | 2.95423  | 1.259148 | 0.974847 | -0.2843  | 0.594618 | 0.244927 | 0.904835 |
| RP11-160H22.5__lin  | 0.058331 | 0.022931 | 0.939486 | 0.12893  | 6.70357  | 61.0596  | 0        | 0.042461 | 0.021144 | -6.05554 | 4.004361 | 10.05991 | 0.361745 | 0.399601 | 0.362212 |
| RP11-161D15.2__lin  | 0        | 0        | 0.680631 | 0        | 0        | 3.62487  | 0        | 0        | 0        | -2.41298 | #DIV/0!  | #DIV/0!  | 0.42265  | 0.42265  | 0.42265  |
| RP11-161D15.3__lin  | 0.049861 | 0.078401 | 0.973157 | 0.066186 | 7.85273  | 3.12308  | 0.114007 | 0        | 0        | -3.32557 | 3.272168 | 6.597735 | 0.288483 | 0.417341 | 0.253438 |
| RP11-161H23.9__an   | 1.98309  | 0.798553 | 3.21074  | 2.94578  | 1.62122  | 110.877  | 1.65996  | 4.05152  | 3.15366  | -4.26792 | -0.56501 | 3.702906 | 0.413117 | 0.492705 | 0.42897  |
| RP11-161I6.2__lincF | 0        | 0.819427 | 2.83167  | 5.18563  | 12.0699  | 476.842  | 0        | 0        | 0        | -7.08032 | #DIV/0!  | #DIV/0!  | 0.402834 | 0.284915 | 0.401984 |
| RP11-161M6.2__linc  | 0.600777 | 1.06544  | 0.096273 | 0.255781 | 2.23065  | 44.9238  | 0.424516 | 0.683526 | 0.010476 | -4.74951 | 0.656026 | 5.405538 | 0.412302 | 0.133919 | 0.405288 |
| RP11-161M6.3__linc  | 0.038066 | 0.112232 | 0        | 0.025245 | 6.23491  | 46.2304  | 0.205054 | 0.020783 | 0        | -8.44809 | -0.58746 | 7.86063  | 0.352005 | 0.770928 | 0.353113 |
| RP11-162I7.1__lincF | 0        | 0.122578 | 0.069213 | 0        | 0.110197 | 0.45981  | 0        | 0        | 0        | -1.57145 | #DIV/0!  | #DIV/0!  | 0.441231 | 0.213387 | 0.303992 |
| RP11-163F15.1__lin  | 0        | 0        | 0.193527 | 0        | 3.33099  | 2.77979  | 0.188408 | 0        | 0.069693 | -4.98075 | -0.4154  | 4.56535  | 0.189894 | 0.834642 | 0.21387  |
| RP11-163M18.1__ar   | 0        | 0.043844 | 0.018621 | 0        | 3.27135  | 14.2177  | 0.082111 | 0.01017  | 0.030396 | -8.12921 | -0.97376 | 7.15545  | 0.309041 | 0.61169  | 0.311251 |
| RP11-164C1.2__linc  | 0        | 0        | 0        | 0        | 0        | 0        | 0        | 0        | 0        | #DIV/0!  | #DIV/0!  | #DIV/0!  | #DIV/0!  | #DIV/0!  | #DIV/0!  |
| RP11-164D18.2__lin  | 0        | 0        | 1.35871  | 0.086381 | 0        | 0        | 0.25649  | 0        | 0.071156 | 3.975381 | 2.052028 | -1.92335 | 0.460444 | 0.546571 | 0.244573 |
| RP11-164H13.1__an   | 0.582143 | 0.113609 | 0.189934 | 29.9978  | 1.79391  | 10.8358  | 0.728105 | 0.778754 | 0.30844  | -5.58885 | -1.03534 | 4.553506 | 0.230729 | 0.223514 | 0.242882 |
| RP11-164J13.1__prc  | 1.06244  | 7.25196  | 4.65173  | 9.05781  | 2.91125  | 44.9238  | 2.94594  | 9.582    | 2.33571  | -2.1335  | -0.19704 | 1.936459 | 0.385735 | 0.710704 | 0.442664 |
| RP11-165E7.1__pro   | 1.12233  | 0.939394 | 1.08303  | 0.610897 | 42.4372  | 579.152  | 0.57577  | 1.33033  | 2.34114  | -7.62829 | -0.43358 | 7.194709 | 0.383302 | 0.553733 | 0.383034 |
| RP11-165P7.1__anti  | 2.1867   | 1.17682  | 1.39166  | 9.6338   | 45.4449  | 39.2093  | 0.622851 | 6.57671  | 4.08995  | -4.3095  | -1.24741 | 3.062091 | 0.11934  | 0.39501  | 0.098476 |
| RP11-166B2.8__anti  | 36.5355  | 35.5535  | 43.6493  | 21.5051  | 36.7152  | 7.40223  | 27.0205  | 52.0482  | 92.9759  | 0.818603 | -0.57192 | -1.39052 | 0.262951 | 0.385178 | 0.294663 |
| RP11-166D19.1__se   | 1.40221  | 1.63102  | 0.832449 | 4.42578  | 9.4723   | 36.4713  | 0.248996 | 0.462618 | 1.4352   | -3.70375 | 0.848525 | 4.552278 | 0.26675  | 0.432539 | 0.235472 |
| RP11-167H9.4__anti  | 2.69594  | 2.64981  | 0        | 1.00063  | 396.288  | 48.7524  | 0        | 0        | 2.76926  | -6.38264 | 0.948892 | 7.331532 | 0.358538 | 0.682556 | 0.358505 |
| RP11-167H9.5__linc  | 0        | 0        | 0.301041 | 0        | 3.66229  | 6.34692  | 0.557075 | 0        | 0        | -5.05522 | -0.88791 | 4.167313 | 0.207054 | 0.766553 | 0.257412 |

|                    |          |          |          |          |          |          |          |          |          |          |          |          |          |          |          |
|--------------------|----------|----------|----------|----------|----------|----------|----------|----------|----------|----------|----------|----------|----------|----------|----------|
| RP11-167H9.6__linc | 0.085069 | 0        | 0        | 0        | 0.612309 | 0        | 0.354551 | 0.183419 | 0        | -2.84755 | -2.66082 | 0.186734 | 0.507591 | 0.197858 | 0.922871 |
| RP11-167N24.3__pr  | 0        | 0        | 0.264955 | 0.345656 | 4.03636  | 9.77181  | 0.703782 | 0        | 0        | -5.7393  | -1.40938 | 4.32992  | 0.224044 | 0.663091 | 0.265941 |
| RP11-167N24.4__lin | 0        | 0        | 0        | 0        | 2.85215  | 4.16464  | 0        | 0        | 0        | #NUM!    | #DIV/0!  | #DIV/0!  | 0.197423 | #DIV/0!  | 0.197423 |
| RP11-168A11.1__an  | 0        | 0        | 0        | 0        | 1.74517  | 34.897   | 0.259519 | 0        | 0        | #NUM!    | #NUM!    | 7.141521 | 0.394534 | 0.42265  | 0.398838 |
| RP11-168C9.1__linc | 0        | 0        | 0        | 0        | 0        | 6.90069  | 0        | 0        | 0        | #NUM!    | #DIV/0!  | #DIV/0!  | 0.42265  | #DIV/0!  | 0.42265  |
| RP11-168E14.1__lin | 0        | 0        | 0        | 2.68005  | 0.804351 | 10.351   | 0.807206 | 0        | 0        | #NUM!    | #NUM!    | 4.099284 | 0.255039 | 0.42265  | 0.287015 |
| RP11-168E17.1__lin | 0        | 0        | 0        | 0        | 0        | 2.11105  | 0        | 0        | 0        | #NUM!    | #DIV/0!  | #DIV/0!  | 0.42265  | #DIV/0!  | 0.42265  |
| RP11-168K9.1__linc | 0        | 0        | 1.46519  | 0        | 2.76527  | 1.71904  | 0.228513 | 0        | 0        | -1.6138  | 2.68074  | 4.294538 | 0.372289 | 0.518515 | 0.247228 |
| RP11-168L7.3__linc | 0        | 0        | 0        | 0        | 1.38122  | 0        | 0        | 0        | 0        | #NUM!    | #DIV/0!  | #DIV/0!  | 0.42265  | #DIV/0!  | 0.42265  |
| RP11-168O16.1__lin | 0.049984 | 0.116702 | 0.629795 | 0.158347 | 0.133877 | 2.20234  | 0.122671 | 0.082043 | 0.190553 | -1.64708 | 1.010813 | 2.657889 | 0.378071 | 0.481279 | 0.39783  |
| RP11-168P8.3__linc | 0        | 0        | 0        | 0        | 0        | 0        | 0        | 0        | 0        | #DIV/0!  | #DIV/0!  | #DIV/0!  | #DIV/0!  | #DIV/0!  | #DIV/0!  |
| RP11-168P8.5__linc | 0        | 0.112026 | 1.12588  | 0        | 1.37545  | 2.8974   | 0.092424 | 0        | 0        | -1.7873  | 3.743487 | 5.530784 | 0.194711 | 0.417425 | 0.247789 |
| RP11-169D4.1__linc | 0.072654 | 0.042837 | 0.523301 | 0.06439  | 4.59199  | 0.220398 | 0.190039 | 0.052962 | 0.092328 | -2.93251 | 0.929767 | 3.862277 | 0.46333  | 0.607858 | 0.422793 |
| RP11-169E6.1__anti | 0.388516 | 0        | 0.129018 | 0.084616 | 1.86185  | 0        | 0.314014 | 0.777349 | 0.348464 | -1.91113 | -1.47617 | 0.434962 | 0.563702 | 0.343549 | 0.748267 |
| RP11-169K16.4__an  | 0.182623 | 0.033759 | 1.79869  | 0.161416 | 11.0858  | 899.74   | 0.677089 | 0.417619 | 0.093612 | -8.82046 | 0.761908 | 9.582364 | 0.415601 | 0.737206 | 0.416175 |
| RP11-169K16.7__ps  | 95.1011  | 33.1364  | 53.3199  | 33.1934  | 7.33422  | 18.504   | 193.196  | 77.0148  | 57.6799  | 1.620866 | -0.85279 | -2.47366 | 0.063881 | 0.214451 | 0.132139 |
| RP11-169K16.9__an  | 0        | 0        | 1.1568   | 0        | 3.19474  | 3.2859   | 0        | 0        | 0        | -2.486   | #DIV/0!  | #DIV/0!  | 0.199384 | 0.42265  | 0.183584 |
| RP11-16B13.1__anti | 7.62992  | 6.49411  | 5.06098  | 5.23918  | 5.06318  | 86.9931  | 3.00591  | 5.12114  | 4.15593  | -2.34239 | 0.643319 | 2.985712 | 0.449898 | 0.188035 | 0.407704 |
| RP11-16E12.1__linc | 0.543694 | 0.113655 | 1.27297  | 7.93046  | 2.86996  | 3.03373  | 0.654987 | 3.19358  | 0.089951 | -2.84132 | -1.02881 | 1.812509 | 0.149261 | 0.648783 | 0.272673 |
| RP11-16L9.2__lincR | 0        | 0        | 0        | 0.10642  | 1.08819  | 438.263  | 0        | 0        | 0        | #NUM!    | #DIV/0!  | #DIV/0!  | 0.421078 | #DIV/0!  | 0.421078 |
| RP11-16L9.4__lincR | 0        | 0        | 0.268683 | 0        | 17.2048  | 7.82739  | 0        | 0        | 0        | -6.54174 | #DIV/0!  | #DIV/0!  | 0.239186 | 0.42265  | 0.235393 |
| RP11-16N11.2__anti | 0.177959 | 0.377765 | 0.178093 | 0.07084  | 0.132971 | 0.917914 | 0.296382 | 1.49786  | 1.92864  | -0.61223 | -2.34293 | -1.7307  | 0.715281 | 0.170956 | 0.123453 |
| RP11-16N2.1__lincR | 0        | 0.081943 | 0.414769 | 0        | 0.58119  | 1.39391  | 0.179775 | 0        | 0        | -1.99145 | 1.466216 | 3.457661 | 0.223394 | 0.601708 | 0.318468 |
| RP11-16P6.1__antis | 0.820805 | 1.09715  | 0.607247 | 2.24585  | 1.77974  | 2.2478   | 0.928517 | 1.2225   | 0.934131 | -1.31285 | -0.28894 | 1.023906 | 0.049928 | 0.117405 | 0.052177 |
| RP11-170L3.7__pse  | 0.279041 | 0        | 0.559212 | 0        | 1.39897  | 0        | 0.481748 | 0.673965 | 0.085519 | -0.73891 | -0.56632 | 0.172592 | 0.788718 | 0.725751 | 0.895879 |
| RP11-170M17.1__lin | 0        | 1.16373  | 1.32159  | 24.6239  | 23.2559  | 44.9238  | 1.11672  | 1.17831  | 1.68998  | -5.22268 | -0.68115 | 4.541526 | 0.047255 | 0.263739 | 0.049267 |
| RP11-171L9.1__linc | 0        | 0        | 0        | 0.074572 | 5.10683  | 8.29391  | 0.073419 | 0.081855 | 0        | #NUM!    | #NUM!    | 6.439358 | 0.201262 | 0.184706 | 0.206969 |
| RP11-171N4.1__linc | 0        | 0        | 0.065719 | 0        | 0        | 0.187232 | 0        | 0        | 0        | -1.51044 | #DIV/0!  | #DIV/0!  | 0.42265  | 0.42265  | 0.42265  |
| RP11-171N4.4__linc | 0.034766 | 0        | 0        | 0        | 7.13885  | 398.421  | 0        | 0        | 0.11302  | -13.51   | -1.70084 | 11.80912 | 0.41245  | 0.617915 | 0.412396 |
| RP11-172E9.2__linc | 0        | 0        | 0        | 0        | 0        | 0        | 0        | 0        | 0        | #DIV/0!  | #DIV/0!  | #DIV/0!  | #DIV/0!  | #DIV/0!  | #DIV/0!  |
| RP11-173A16.2__se  | 0.822906 | 0.970488 | 1.20641  | 0.634554 | 0.122503 | 0.383761 | 0.506062 | 1.52547  | 0.624358 | 1.3948   | 0.175673 | -1.21913 | 0.102883 | 0.770292 | 0.387975 |
| RP11-173E2.2__linc | 0        | 0        | 0.19903  | 0.173971 | 0.279111 | 0        | 0.193724 | 0        | 0.071657 | -1.18679 | -0.41508 | 0.771705 | 0.61845  | 0.83477  | 0.624812 |
| RP11-173M1.4__linc | 0        | 0.176861 | 0.179848 | 0.317054 | 8.82401  | 3.8461   | 0.23441  | 0        | 0.778775 | -5.18619 | -1.50608 | 3.680117 | 0.224037 | 0.431793 | 0.260013 |
| RP11-173P15.7__an  | 3.39384  | 0.749089 | 0.914291 | 1.8287   | 2.05113  | 19.3057  | 0.37045  | 3.99226  | 1.6527   | -2.19681 | -0.25032 | 1.94649  | 0.434364 | 0.876925 | 0.443679 |
| RP11-174G17.2__lin | 0        | 0        | 1.08884  | 0.031906 | 204.943  | 2.73883  | 1.15535  | 0        | 0.065355 | -7.57566 | -0.16492 | 7.410738 | 0.41793  | 0.950675 | 0.418341 |

|                     |          |          |          |          |          |          |          |          |          |          |          |          |          |          |          |
|---------------------|----------|----------|----------|----------|----------|----------|----------|----------|----------|----------|----------|----------|----------|----------|----------|
| RP11-174G6.1__ant   | 3.01473  | 9.88227  | 6.98957  | 129.665  | 91.5996  | 926.643  | 11.5538  | 14.5444  | 94.2788  | -5.85107 | -2.59769 | 3.253375 | 0.301162 | 0.339424 | 0.297291 |
| RP11-174G6.5__sen   | 1.79735  | 1.41275  | 5.13192  | 2.03958  | 0.790177 | 5.29314  | 0.926706 | 3.97442  | 3.3958   | 0.038402 | 0.00782  | -0.03058 | 0.815908 | 0.991901 | 0.974038 |
| RP11-174J11.1__linc | 0        | 0        | 0.291027 | 0        | 0.490895 | 19.9684  | 0.226832 | 0        | 0        | -6.13546 | 0.359529 | 6.494988 | 0.408431 | 0.899554 | 0.415229 |
| RP11-174M13.2__lin  | 0        | 0        | 0        | 0        | 0.115802 | 1.10799  | 0        | 0        | 0        | #NUM!    | #DIV/0!  | #DIV/0!  | 0.365762 | #DIV/0!  | 0.365762 |
| RP11-174O3.3__ant   | 0.02682  | 1.71765  | 0.51694  | 0        | 2.1161   | 2.02675  | 0.475588 | 0.350899 | 0        | -0.8734  | 1.452158 | 2.32556  | 0.304458 | 0.458033 | 0.298499 |
| RP11-175B12.2__lin  | 1.20992  | 6.62042  | 4.41798  | 3.7793   | 8.37163  | 4.45801  | 5.78577  | 7.4003   | 40.6514  | -0.43938 | -2.13603 | -1.69665 | 0.190395 | 0.342682 | 0.407261 |
| RP11-175I17.2__pse  | 0        | 0        | 0        | 0        | 0        | 0        | 0        | 0        | 2.84616  | #DIV/0!  | #NUM!    | #NUM!    | #DIV/0!  | 0.42265  | 0.42265  |
| RP11-175O19.4__ar   | 1.885    | 3.00002  | 2.05561  | 8.65139  | 2.51924  | 7.49485  | 2.19317  | 2.89718  | 1.76815  | -1.42723 | 0.017174 | 1.444408 | 0.221454 | 0.890691 | 0.211007 |
| RP11-177B4.2__linc  | 0        | 0        | 0.052493 | 0        | 1.29514  | 4.65407  | 0.167955 | 0        | 0        | -6.82443 | -1.67788 | 5.146551 | 0.287822 | 0.621168 | 0.309491 |
| RP11-177C12.4__ps   | 0.196537 | 0.154648 | 0.587347 | 0        | 0.411963 | 0.551423 | 0.69882  | 0.283573 | 0.211494 | -0.03771 | -0.34719 | -0.30948 | 0.955953 | 0.769803 | 0.831041 |
| RP11-177N22.3__se   | 0.159452 | 0.752992 | 0.158623 | 0        | 0        | 0        | 0.462478 | 0.602266 | 0.256558 | #DIV/0!  | -0.30291 | #NUM!    | 0.21312  | 0.589946 | 0.048239 |
| RP11-178F10.2__lin  | 0        | 0        | 0.641151 | 0.0933   | 1.9828   | 2.61983  | 0        | 0        | 0        | -2.87267 | #DIV/0!  | #DIV/0!  | 0.164737 | 0.42265  | 0.175151 |
| RP11-178L8.5__sen   | 0        | 0.104588 | 0.711025 | 0        | 9.03795  | 30.7991  | 0.622335 | 0.058127 | 0.038596 | -5.61008 | 0.181777 | 5.79186  | 0.282201 | 0.939234 | 0.295337 |
| RP11-178L8.7__anti  | 0.544011 | 1.28574  | 0.538267 | 0        | 1.66579  | 2.31946  | 1.68946  | 0.237491 | 0.576314 | -0.75099 | -0.08013 | 0.670859 | 0.50878  | 0.949725 | 0.696214 |
| RP11-179A10.1__lin  | 0        | 0        | 2.36216  | 229.013  | 18.6963  | 61.0596  | 0        | 0        | 0        | -7.03028 | #DIV/0!  | #DIV/0!  | 0.254053 | 0.42265  | 0.250186 |
| RP11-179A16.1__lin  | 3.59459  | 0        | 0.763015 | 21.5051  | 1867.38  | 75.9819  | 2.08681  | 0        | 0.283167 | -8.81668 | 0.878662 | 9.695343 | 0.394375 | 0.274751 | 0.393772 |
| RP11-179B15.6__lin  | 0        | 0.026155 | 0.133104 | 0.264456 | 0.23632  | 0.42295  | 0.021706 | 0        | 0        | -2.53609 | 2.875239 | 5.411326 | 0.008398 | 0.421899 | 0.038981 |
| RP11-179K3.2__linc  | 0.063864 | 0.075377 | 0.381775 | 0        | 2.29302  | 0.059772 | 0        | 0        | 0        | -2.17497 | #DIV/0!  | #DIV/0!  | 0.528249 | 0.237205 | 0.407801 |
| RP11-17A1.3__antis  | 5.35809  | 5.95445  | 5.6145   | 50.85    | 15.7838  | 34.3314  | 3.64745  | 7.95378  | 4.86565  | -2.57646 | 0.039762 | 2.616219 | 0.112797 | 0.902889 | 0.131825 |
| RP11-17E2.2__antis  | 0.226042 | 26.2032  | 1.64688  | 1.71039  | 820.802  | 69.6969  | 2.5716   | 4.70575  | 1.04935  | -4.98997 | 1.753527 | 6.743494 | 0.374418 | 0.472926 | 0.376895 |
| RP11-17L5.4__lincR  | 515.885  | 83.9987  | 512.463  | 140.678  | 120.333  | 30.7825  | 39.7686  | 254.781  | 6.54311  | 1.930587 | 1.885327 | -0.04526 | 0.225462 | 0.3453   | 0.968389 |
| RP11-17M15.2__pse   | 0.007858 | 0.283046 | 0.017704 | 0.117533 | 1.98674  | 0.360335 | 0.183072 | 0.567286 | 0.27606  | -2.99751 | -1.73377 | 1.26374  | 0.285136 | 0.018374 | 0.416677 |
| RP11-180D21.3__lin  | 0        | 0        | 0        | 11.0931  | 0.291759 | 153.62   | 0.115185 | 0.085648 | 0        | #NUM!    | #NUM!    | 9.682296 | 0.381474 | 0.192193 | 0.382193 |
| RP11-181G12.4__lin  | 0        | 0.183005 | 0        | 0        | 3.76839  | 5.30021  | 0        | 0        | 0        | -5.63092 | #DIV/0!  | #DIV/0!  | 0.198297 | 0.42265  | 0.194908 |
| RP11-182I10.3__linc | 1.01166  | 2.05823  | 1.79708  | 3.90477  | 14.2914  | 66.378   | 1.16586  | 1.72102  | 0.730299 | -4.11912 | 0.428159 | 4.54728  | 0.300549 | 0.361097 | 0.3013   |
| RP11-183M13.1__pr   | 0.236621 | 0.229492 | 1.62562  | 1.51012  | 2.43826  | 48.3233  | 1.20331  | 0.688386 | 0.715511 | -4.64326 | -0.31781 | 4.325452 | 0.380519 | 0.788143 | 0.398127 |
| RP11-184A2.2__anti  | 0        | 0        | 0        | 0        | 0        | 1.69047  | 0        | 0        | 0        | #NUM!    | #DIV/0!  | #DIV/0!  | 0.42265  | #DIV/0!  | 0.42265  |
| RP11-184A2.3__anti  | 0        | 0        | 0        | 4.60487  | 1.78655  | 3.70807  | 0.501102 | 0        | 0.344015 | #NUM!    | #NUM!    | 3.578988 | 0.055913 | 0.197253 | 0.045731 |
| RP11-184D12.1__lin  | 0.022599 | 0.008882 | 1.50824  | 13.0308  | 37.5408  | 197.997  | 0.044377 | 0        | 0.008214 | -7.33483 | 4.871707 | 12.20654 | 0.288539 | 0.427684 | 0.289468 |
| RP11-184E9.1__linc  | 7.19206  | 10.113   | 5.60231  | 5.59959  | 100.521  | 6.49302  | 5.07163  | 5.79927  | 7.12582  | -2.2975  | 0.348078 | 2.645575 | 0.427248 | 0.437732 | 0.423311 |
| RP11-184E9.2__linc  | 0        | 0        | 0.061216 | 0.054079 | 0.108743 | 13.9801  | 0.079878 | 0        | 0.044347 | -7.85195 | -1.02097 | 6.830977 | 0.415918 | 0.554408 | 0.419232 |
| RP11-184M15.1__lin  | 0.2407   | 0.094624 | 0.409257 | 0        | 0.085568 | 3.75394  | 0.117847 | 0        | 0.043618 | -2.36642 | 2.20521  | 4.571631 | 0.467142 | 0.152333 | 0.428113 |
| RP11-184M15.2__lin  | 0        | 0        | 0        | 0        | 1.59916  | 12.9739  | 0        | 0        | 0        | #NUM!    | #DIV/0!  | #DIV/0!  | 0.356357 | #DIV/0!  | 0.356357 |
| RP11-185E12.2__an   | 0.097029 | 0.2861   | 4.85786  | 0.192712 | 0.387422 | 12.2651  | 0.332237 | 0.264609 | 0.131744 | -1.29332 | 2.84666  | 4.139982 | 0.407399 | 0.449445 | 0.423513 |
| RP11-185E8.1__linc  | 0        | 0        | 0        | 0        | 0        | 0        | 1.23521  | 0        | 0        | #DIV/0!  | #NUM!    | #NUM!    | #DIV/0!  | 0.42265  | 0.42265  |



|                     |          |          |          |          |          |          |          |          |          |          |          |          |          |          |          |
|---------------------|----------|----------|----------|----------|----------|----------|----------|----------|----------|----------|----------|----------|----------|----------|----------|
| RP11-1L12.3__antis  | 3.15037  | 0        | 7.01203  | 21.8519  | 17.2048  | 145.198  | 14.6659  | 2.77397  | 0.066048 | -4.18039 | -0.7846  | 3.395787 | 0.284626 | 0.691233 | 0.340711 |
| RP11-1O2.1__proce   | 0        | 0        | 0.042211 | 0.135417 | 0.157914 | 1.23351  | 0.010339 | 0.023051 | 0.278477 | -5.1768  | -2.88526 | 2.291546 | 0.291215 | 0.344791 | 0.278761 |
| RP11-200A1.1__linc  | 0        | 0        | 0        | 0        | 4.23077  | 1.4578   | 1.53064  | 0        | 1.94523  | #NUM!    | #NUM!    | 0.710692 | 0.26606  | 0.18925  | 0.717708 |
| RP11-201A3.1__linc  | 0        | 0        | 0.039321 | 0        | 0        | 0.02507  | 0.038514 | 0        | 0        | 0.64932  | 0.029902 | -0.61942 | 0.42265  | 0.991539 | 0.831098 |
| RP11-201M22.1__lin  | 0        | 0        | 0.099103 | 0.10851  | 34.1393  | 30.7991  | 0.193542 | 0        | 0.107278 | -9.35833 | -1.6019  | 7.756436 | 0.183287 | 0.3988   | 0.185726 |
| RP11-202A13.1__lin  | 0.056272 | 0        | 0        | 0        | 1.65962  | 0        | 0.109352 | 0.061003 | 0        | -4.8823  | -1.59806 | 3.284236 | 0.442546 | 0.185465 | 0.463397 |
| RP11-202D1.2__linc  | 0        | 0.074004 | 0.062702 | 0.082876 | 0        | 0        | 0        | 0        | 0.272146 | 0.722046 | -0.9933  | -1.71535 | 0.756399 | 0.647977 | 0.615886 |
| RP11-202D1.3__linc  | 0        | 0        | 0.053944 | 0        | 16.186   | 54.7378  | 0        | 0        | 0        | -10.3606 | #DIV/0!  | #DIV/0!  | 0.282528 | 0.42265  | 0.282633 |
| RP11-202K23.1__lin  | 0        | 0        | 0.388142 | 0        | 15.9156  | 61.0596  | 0        | 0        | 0.424055 | -7.63167 | -0.12767 | 7.503999 | 0.295048 | 0.42265  | 0.294989 |
| RP11-203B7.2__linc  | 0        | 0.057405 | 0.083612 | 0.046309 | 0.216207 | 0.093497 | 0.054638 | 0.030451 | 0.022755 | -1.33606 | 0.386937 | 1.722996 | 0.250939 | 0.777582 | 0.279798 |
| RP11-204C23.1__lin  | 0        | 0        | 0        | 0.335007 | 0        | 1.23109  | 0        | 0        | 0        | #NUM!    | #DIV/0!  | #DIV/0!  | 0.291311 | #DIV/0!  | 0.291311 |
| RP11-205M3.3__linc  | 1.53104  | 0.023402 | 0.363595 | 0.552198 | 53.505   | 38.4574  | 0.705765 | 0.194919 | 0.293597 | -5.59198 | 0.683488 | 6.275467 | 0.203487 | 0.505965 | 0.195826 |
| RP11-206L10.11__p   | 4.8322   | 1.44476  | 3.81349  | 10.8262  | 5.27698  | 6.58158  | 3.12507  | 3.51667  | 1.71087  | -1.16873 | 0.272692 | 1.441424 | 0.047494 | 0.705765 | 0.108392 |
| RP11-206L10.3__lin  | 1.97357  | 1.93853  | 2.42426  | 2.12849  | 3.20913  | 5.90725  | 0.946979 | 7.13968  | 0.637957 | -0.82754 | -0.46144 | 0.366103 | 0.236291 | 0.753526 | 0.782147 |
| RP11-206L10.8__ps   | 1.7112   | 0        | 0        | 2.20133  | 117.704  | 3.58948  | 1.15422  | 2.20449  | 0        | -6.1733  | -0.9729  | 5.200399 | 0.402922 | 0.581667 | 0.399787 |
| RP11-206L10.9__lin  | 1.46168  | 1.27583  | 2.75971  | 10.6189  | 2.43137  | 19.7774  | 2.1325   | 1.63377  | 1.58828  | -2.57814 | 0.037937 | 2.616075 | 0.184937 | 0.941019 | 0.210366 |
| RP11-206M11.7__ar   | 2.63276  | 0.358162 | 0.836019 | 0.536767 | 3.91706  | 29.8184  | 0.279432 | 1.48816  | 1.05931  | -3.16278 | 0.43697  | 3.599746 | 0.399574 | 0.779637 | 0.370987 |
| RP11-208K4.1__linc  | 0        | 2.06482  | 1.80591  | 10.3817  | 92.1606  | 1554.35  | 0.282018 | 0        | 0        | -8.74166 | 3.778747 | 12.5204  | 0.386331 | 0.248641 | 0.385758 |
| RP11-208N14.4__an   | 0.01347  | 0        | 0.161828 | 0.12529  | 2.03777  | 7.28353  | 0.184918 | 0        | 0.088005 | -5.75191 | -0.63869 | 5.113228 | 0.277466 | 0.69805  | 0.291804 |
| RP11-20B24.5__anti  | 0        | 0        | 0.154963 | 6.57213  | 1.47683  | 11.7262  | 2.88776  | 0        | 0        | -6.99562 | -4.21996 | 2.775667 | 0.153958 | 0.454416 | 0.212431 |
| RP11-20B7.1__lincR  | 0.131259 | 0        | 0.087353 | 1.80207  | 28.6481  | 4.36588  | 0.298381 | 0        | 0        | -7.31524 | -0.44878 | 6.866453 | 0.311544 | 0.755774 | 0.313223 |
| RP11-20D14.6__linc  | 0.2162   | 0.010033 | 0.219177 | 0.421187 | 0        | 2.46086  | 0.133378 | 0.141362 | 0.423927 | -2.69389 | -0.64947 | 2.044417 | 0.375053 | 0.430974 | 0.388669 |
| RP11-20E24.1__linc  | 0.474295 | 0        | 0.314573 | 0        | 4.96022  | 25.4267  | 0.076436 | 1.06     | 0.169612 | -5.26752 | -0.72735 | 4.540171 | 0.332527 | 0.738408 | 0.343032 |
| RP11-20G13.2__ant   | 0        | 0        | 1.38557  | 4.92348  | 1.86945  | 14.7858  | 0        | 0.23674  | 10.5605  | -3.96106 | -2.96211 | 0.998947 | 0.190266 | 0.407949 | 0.069588 |
| RP11-20G6.2__lincR  | 0        | 0        | 0.509031 | 0.200935 | 1.69323  | 1.25015  | 0.099273 | 0.110749 | 0.110184 | -2.62692 | 0.668755 | 3.295675 | 0.181651 | 0.743893 | 0.165119 |
| RP11-20J15.2__lincf | 0        | 0        | 0.279965 | 0        | 1.43819  | 1.49031  | 0.11715  | 0        | 0.086697 | -3.38684 | 0.457761 | 3.844605 | 0.186508 | 0.805546 | 0.218547 |
| RP11-20L19.1__lincf | 0        | 0        | 0.040052 | 0        | 0.21223  | 0.189694 | 0        | 0        | 0        | -3.32697 | #DIV/0!  | #DIV/0!  | 0.195448 | 0.42265  | 0.184784 |
| RP11-211G23.1__lin  | 0.024494 | 0        | 0.098103 | 0.113962 | 1.56103  | 1.92897  | 0.0961   | 0.040173 | 0.040019 | -4.87758 | -0.52405 | 4.353538 | 0.165183 | 0.691757 | 0.18399  |
| RP11-212I21.2__linc | 1.11267  | 3.7826   | 2.52292  | 24.6239  | 23.2559  | 23.8993  | 0        | 0.643171 | 0        | -3.27442 | 3.527793 | 6.802218 | 0.002942 | 0.063866 | 0.000615 |
| RP11-213G21.2__lin  | 0        | 0        | 0        | 0        | 0        | 10.4482  | 0.075803 | 0        | 0        | #NUM!    | #NUM!    | 7.106782 | 0.42265  | 0.42265  | 0.426854 |
| RP11-214C8.2__linc  | 0.048472 | 0.028585 | 0.072718 | 1.80207  | 2.41214  | 1.43706  | 0.437009 | 0        | 0.078978 | -5.23771 | -1.78454 | 3.453167 | 0.025232 | 0.45736  | 0.039397 |
| RP11-214L13.1__lin  | 0        | 0        | 0        | 0        | 0        | 1.75652  | 0.025286 | 0        | 0.028079 | #NUM!    | #NUM!    | 5.040677 | 0.42265  | 0.18462  | 0.431157 |
| RP11-214L19.1__lin  | 0        | 0        | 0        | 0        | 0        | 0        | 0        | 0        | 0        | #DIV/0!  | #DIV/0!  | #DIV/0!  | #DIV/0!  | #DIV/0!  | #DIV/0!  |
| RP11-214O1.1__linc  | 0        | 0        | 0.080264 | 0        | 0.154181 | 0.367026 | 0.110027 | 0        | 0        | -2.69902 | -0.45503 | 2.243999 | 0.218084 | 0.873829 | 0.425222 |
| RP11-215E13.1__lin  | 0        | 0        | 0.89162  | 0        | 170.785  | 4.41421  | 0        | 0        | 2.06113  | -7.61835 | -1.20893 | 6.409417 | 0.410867 | 0.42265  | 0.414751 |

|                    |          |          |          |          |          |          |          |          |          |          |          |          |          |          |          |
|--------------------|----------|----------|----------|----------|----------|----------|----------|----------|----------|----------|----------|----------|----------|----------|----------|
| RP11-215H22.1__lin | 0        | 0        | 0.013144 | 0        | 0.154424 | 0        | 0        | 0        | 0.042889 | -3.55444 | -1.70622 | 1.848224 | 0.473694 | 0.42265  | 0.598208 |
| RP11-215N21.1__lin | 0.096585 | 0        | 0.020435 | 0.027079 | 136.332  | 216.364  | 0        | 0.044595 | 0.022206 | -11.5576 | 0.808828 | 12.36639 | 0.203895 | 0.727491 | 0.203703 |
| RP11-217B1.2__anti | 0.144656 | 0.136502 | 0.144609 | 0        | 0.461241 | 0.967694 | 0.197929 | 0.126124 | 2.6606   | -1.7468  | -2.80943 | -1.06262 | 0.35401  | 0.412943 | 0.482926 |
| RP11-217C7.1__linc | 0        | 0        | 1.80792  | 0        | 5.69806  | 19.6241  | 0.204969 | 0        | 0        | -3.808   | 3.140853 | 6.948851 | 0.274215 | 0.491364 | 0.290386 |
| RP11-217E13.1__lin | 0        | 0        | 20.8473  | 0        | 66.5216  | 417.124  | 0.784114 | 174.544  | 0        | -4.53602 | -3.07212 | 1.463893 | 0.335036 | 0.492625 | 0.58688  |
| RP11-218C14.5__lin | 0.095546 | 0        | 0        | 0        | 1.88419  | 2.30872  | 0.092065 | 0        | 1.02125  | -5.45561 | -3.54252 | 1.91309  | 0.206576 | 0.424621 | 0.221507 |
| RP11-218E20.3__lin | 0.006136 | 0.01447  | 0.089447 | 0.089905 | 0.111852 | 0.501291 | 0.080235 | 0.006717 | 0.060236 | -2.67542 | -0.41945 | 2.255969 | 0.206405 | 0.732091 | 0.29236  |
| RP11-218F4.1__linc | 0.02317  | 0        | 1.19134  | 0        | 4.00173  | 234.075  | 1.82598  | 0.126404 | 0.053545 | -7.61491 | -0.7239  | 6.891013 | 0.412873 | 0.786041 | 0.417691 |
| RP11-218M22.1__ar  | 2.15088  | 0.480253 | 1.12309  | 2.66828  | 1.58212  | 9.02895  | 0.944951 | 1.56724  | 0.940092 | -1.8226  | 0.120964 | 1.943562 | 0.3125   | 0.893301 | 0.313981 |
| RP11-218M22.2__lin | 0        | 0        | 0        | 0        | 0        | 1.44549  | 0.229948 | 0        | 0        | #NUM!    | #NUM!    | 2.652179 | 0.42265  | 0.42265  | 0.520523 |
| RP11-219B17.1__an  | 6.65338  | 5.80645  | 8.3479   | 8.24835  | 8.84081  | 323.286  | 3.97892  | 17.7259  | 3.72629  | -4.03193 | -0.28947 | 3.742459 | 0.414198 | 0.795625 | 0.431259 |
| RP11-219E7.3__linc | 0.021132 | 0.033227 | 0.198338 | 0.037433 | 0.245977 | 0.188773 | 0.048345 | 0.030797 | 0        | -0.90194 | 1.674882 | 2.576819 | 0.406708 | 0.499519 | 0.207828 |
| RP11-219F10.1__lin | 0        | 0        | 0.832535 | 0        | 0        | 0        | 0        | 0        | 0        | #DIV/0!  | #DIV/0!  | #DIV/0!  | 0.42265  | 0.42265  | #DIV/0!  |
| RP11-21A7A.2__ant  | 0.008985 | 0.031782 | 0.973303 | 4.36444  | 42.5527  | 77.3173  | 0.105825 | 0        | 0        | -6.93676 | 3.260405 | 10.19717 | 0.186912 | 0.464171 | 0.188901 |
| RP11-21A7A.4__ant  | 0        | 0        | 0        | 0        | 39.9278  | 5.11648  | 0.308409 | 0        | 0        | #NUM!    | #NUM!    | 7.190355 | 0.353949 | 0.42265  | 0.358391 |
| RP11-21B23.3__linc | 0        | 0        | 0.142116 | 0        | 0        | 0        | 0        | 0.950671 | 0        | #DIV/0!  | -2.74188 | #NUM!    | 0.42265  | 0.514354 | 0.42265  |
| RP11-21J18.1__proc | 38.6136  | 71.6264  | 16.8043  | 7.93406  | 23.3512  | 634.02   | 4.16161  | 115.625  | 10.2082  | -2.38868 | -0.03312 | 2.355562 | 0.498653 | 0.969727 | 0.509901 |
| RP11-21J7.1__lincR | 7.56998  | 2.16261  | 2.6576   | 19.9059  | 5.64597  | 1.09597  | 0        | 6.58799  | 0.222283 | -1.10482 | 0.863414 | 1.968234 | 0.362533 | 0.646002 | 0.425826 |
| RP11-21L23.2__sen  | 1.23121  | 16.2221  | 0.573592 | 3.36057  | 1.84637  | 2.73453  | 4.58975  | 0.561838 | 0.172586 | 1.182673 | 1.759522 | 0.576848 | 0.603683 | 0.542241 | 0.515427 |
| RP11-21L23.4__anti | 0.493519 | 0        | 0.546811 | 0        | 2.20101  | 11.0808  | 0.839086 | 0.118925 | 0.295758 | -3.67434 | -0.26923 | 3.405108 | 0.343937 | 0.72207  | 0.369619 |
| RP11-222A11.1__lin | 35.4441  | 18.7261  | 8.0182   | 158.855  | 31.5562  | 34.3314  | 8.72456  | 15.9405  | 3.76866  | -1.85356 | 1.129043 | 2.982599 | 0.26006  | 0.283477 | 0.264049 |
| RP11-222A5.1__linc | 0        | 0        | 0.083922 | 0.354626 | 6.31129  | 0.304588 | 0.131463 | 0        | 0.036495 | -6.37608 | -1.00098 | 5.375094 | 0.371398 | 0.652837 | 0.378658 |
| RP11-222N13.1__lin | 0        | 0        | 0        | 0        | 2.02356  | 1.52805  | 0        | 0        | 0        | #NUM!    | #DIV/0!  | #DIV/0!  | 0.191336 | #DIV/0!  | 0.191336 |
| RP11-225H22.4__an  | 2.31318  | 0.425629 | 0.572932 | 0.837888 | 1.80878  | 95.6924  | 0.664208 | 1.32127  | 1.07996  | -4.8921  | 0.111497 | 5.0036   | 0.423339 | 0.926843 | 0.418624 |
| RP11-225H22.5__an  | 0.222188 | 0        | 0.298513 | 0.1965   | 25.6035  | 20.9745  | 1.329    | 0.101102 | 0.060416 | -6.48912 | -1.51729 | 4.971837 | 0.188543 | 0.507385 | 0.207755 |
| RP11-225N10.1__an  | 0.016112 | 0        | 0.048381 | 0.064173 | 0.223727 | 0.04622  | 1.05557  | 0        | 0        | -2.37316 | -4.03274 | -1.65959 | 0.31975  | 0.450117 | 0.590585 |
| RP11-226L15.5__se  | 2.48307  | 0.930833 | 1.87302  | 2.3794   | 39.9278  | 0.26727  | 0.644586 | 3.38484  | 1.30627  | -3.00949 | -0.01325 | 2.99624  | 0.448427 | 0.99097  | 0.412555 |
| RP11-227B21.2__an  | 0        | 0.261445 | 0.220449 | 0        | 1.0798   | 12.3513  | 0        | 0.079761 | 0        | -4.80072 | 2.594969 | 7.395687 | 0.385099 | 0.187271 | 0.377939 |
| RP11-227D2.3__anti | 0        | 0        | 0.037884 | 0        | 2.96973  | 0        | 0.111244 | 0        | 0.061762 | -6.2926  | -2.19116 | 4.101441 | 0.430061 | 0.314343 | 0.456782 |
| RP11-227F19.1__an  | 0        | 0        | 0.463799 | 3.0918   | 36.0883  | 26.6948  | 1.56224  | 0.052934 | 0.073829 | -7.15009 | -1.8646  | 5.285486 | 0.155544 | 0.560924 | 0.173338 |
| RP11-227F19.2__lin | 0        | 0        | 0        | 0        | 0        | 1.93714  | 0        | 0        | 0        | #NUM!    | #DIV/0!  | #DIV/0!  | 0.42265  | #DIV/0!  | 0.42265  |
| RP11-227G15.3__pr  | 56.2142  | 46.0514  | 41.0558  | 23.2812  | 10.7353  | 8.92172  | 16.5395  | 49.3463  | 53.9342  | 1.73892  | 0.258385 | -1.48053 | 0.000815 | 0.675723 | 0.256309 |
| RP11-227H15.4__an  | 0        | 0.036812 | 0.093737 | 17.7383  | 50.2635  | 98.4169  | 163.821  | 0.102328 | 0.101924 | -10.316  | -10.2951 | 0.0209   | 0.141457 | 0.42239  | 0.992453 |
| RP11-22A3.2__lincR | 0.549265 | 0.875132 | 0.197388 | 0.364072 | 0.594738 | 0.031487 | 0.342752 | 0.16767  | 0.095448 | 0.71165  | 1.420503 | 0.708853 | 0.027122 | 0.211646 | 0.486653 |
| RP11-22B23.1__pse  | 0.962094 | 1.25968  | 1.2549   | 1.40486  | 2.17864  | 4.21356  | 1.23133  | 1.90439  | 3.61874  | -1.16522 | -0.95813 | 0.20709  | 0.202965 | 0.232258 | 0.111646 |

|                     |          |          |          |          |          |          |          |          |          |          |          |          |          |          |          |
|---------------------|----------|----------|----------|----------|----------|----------|----------|----------|----------|----------|----------|----------|----------|----------|----------|
| RP11-22P4.1__lincR  | 1.8242   | 2.22624  | 1.18443  | 27.878   | 31.5562  | 714.898  | 0.99602  | 0.785146 | 0.99138  | -7.20866 | 0.916942 | 8.125597 | 0.378785 | 0.150403 | 0.377044 |
| RP11-230B22.1__an   | 0.180292 | 0.833884 | 1.11352  | 0.238606 | 14.9409  | 6.92982  | 0.70044  | 2.88931  | 0.841612 | -3.37729 | -1.05846 | 2.318833 | 0.243967 | 0.377792 | 0.244532 |
| RP11-230G5.2__linc  | 5.52421  | 4.76255  | 1.9282   | 3.27279  | 30.7242  | 341.396  | 1.16443  | 3.30987  | 2.74699  | -4.94168 | 0.758321 | 5.700001 | 0.384136 | 0.382344 | 0.374376 |
| RP11-231C14.3__ps   | 6.48399  | 1.17977  | 6.94176  | 5.97937  | 9.28457  | 2.41497  | 3.02746  | 8.97728  | 15.072   | -0.27552 | -0.89054 | -0.61502 | 0.80914  | 0.388951 | 0.582638 |
| RP11-231C18.1__lin  | 0        | 0        | 0        | 0        | 1.84571  | 2.40124  | 0.163327 | 0.182326 | 0        | #NUM!    | #NUM!    | 3.619031 | 0.1904   | 0.184734 | 0.230117 |
| RP11-231C18.2__lin  | 0        | 0        | 0.070168 | 0        | 0        | 0        | 0        | 0.076187 | 0        | #DIV/0!  | -0.11874 | #NUM!    | 0.42265  | 0.966447 | 0.42265  |
| RP11-231E19.1__lin  | 0        | 1.0978   | 0.12808  | 0        | 0.136898 | 0.224765 | 0.444737 | 0        | 0.046452 | 1.7611   | 1.319467 | -0.44163 | 0.483351 | 0.642733 | 0.849933 |
| RP11-231E4.2__linc  | 0        | 0        | 0.125383 | 0.166241 | 0.458513 | 0.085505 | 0.170342 | 0        | 0        | -2.502   | -0.44209 | 2.059911 | 0.309941 | 0.877278 | 0.331695 |
| RP11-231I16.1__ant  | 4.77205  | 3.78883  | 3.41986  | 60.4405  | 0        | 9.08022  | 3.81186  | 14.7221  | 0        | -2.53673 | -0.62945 | 1.907272 | 0.407657 | 0.67088  | 0.502846 |
| RP11-231N3.1__linc  | 0        | 0        | 0        | 0        | 0        | 2.11451  | 0.351907 | 0        | 0.167392 | #NUM!    | #NUM!    | 2.025686 | 0.42265  | 0.230627 | 0.534536 |
| RP11-231P20.2__ps   | 0.08977  | 0.070593 | 0.957142 | 0.197738 | 53.8387  | 238.001  | 0.116955 | 0.065211 | 0.227231 | -8.02973 | 1.448706 | 9.478436 | 0.308982 | 0.4403   | 0.309326 |
| RP11-232C2.1__anti  | 0        | 0        | 0        | 0        | 0.354913 | 6.81297  | 0        | 0        | 0.080624 | #NUM!    | #NUM!    | 6.474187 | 0.393396 | 0.42265  | 0.393056 |
| RP11-232L2.2__anti  | 0.771402 | 6.69171  | 1.54291  | 2.46191  | 2.08701  | 4.00776  | 2.51958  | 5.33812  | 3.44984  | 0.073839 | -0.32832 | -0.40216 | 0.952743 | 0.544893 | 0.518599 |
| RP11-232M24.1__lin  | 0        | 0        | 0        | 0        | 4.63439  | 19.9684  | 0.081193 | 0        | 0        | #NUM!    | #NUM!    | 8.243258 | 0.307072 | 0.42265  | 0.309364 |
| RP11-234B24.2__lin  | 0.2274   | 0.851671 | 0.520849 | 2.24155  | 10.1421  | 5.19907  | 1.37585  | 2.82332  | 1.38344  | -3.45809 | -1.80294 | 1.655147 | 0.129056 | 0.057367 | 0.165166 |
| RP11-234B24.4__lin  | 0        | 0        | 0.777681 | 0        | 0        | 0        | 0.518808 | 0.29549  | 0        | #DIV/0!  | -0.06638 | #NUM!    | 0.42265  | 0.978437 | 0.212578 |
| RP11-234K24.3__an   | 0        | 0.20024  | 0.106079 | 7.07112  | 0.171424 | 7.26725  | 10.2512  | 0.023888 | 0        | -5.56585 | -5.06797 | 0.497876 | 0.185176 | 0.438669 | 0.691842 |
| RP11-234O6.2__ant   | 0        | 0        | 0        | 0        | 0.077615 | 11.6619  | 0        | 0        | 0        | #NUM!    | #DIV/0!  | #DIV/0!  | 0.41882  | #DIV/0!  | 0.41882  |
| RP11-236B18.2__lin  | 0.11818  | 0        | 0.234262 | 0        | 0        | 16.6256  | 0.702527 | 0        | 0        | -5.55988 | -0.99517 | 4.564709 | 0.426827 | 0.678945 | 0.447539 |
| RP11-236J17.3__an   | 0        | 0        | 0.240574 | 0.18265  | 8.6133   | 0.226983 | 0.156157 | 0        | 0.021396 | -5.22904 | 0.438233 | 5.667276 | 0.411451 | 0.864798 | 0.407265 |
| RP11-236J17.5__sei  | 0.044629 | 0        | 0.491704 | 0.177823 | 2.86234  | 93.7922  | 0.174996 | 0.097545 | 0.275292 | -7.49622 | -0.03061 | 7.46561  | 0.404394 | 0.975483 | 0.405823 |
| RP11-236P13.1__lin  | 0.585198 | 0        | 0        | 0        | 0        | 0        | 0.497993 | 0        | 0.061046 | #DIV/0!  | 0.065977 | #NUM!    | 0.42265  | 0.858117 | 0.356692 |
| RP11-237D3.1__linc  | 0        | 0        | 0        | 0        | 0.689217 | 0        | 0        | 0        | 0        | #NUM!    | #DIV/0!  | #DIV/0!  | 0.42265  | #DIV/0!  | 0.42265  |
| RP11-239E10.3__lin  | 0        | 0        | 1.65526  | 0        | 0.084749 | 1.66359  | 0.725433 | 0        | 0        | -0.07893 | 1.190144 | 1.269071 | 0.368943 | 0.702954 | 0.674947 |
| RP11-23D24.2__pro   | 0.663081 | 0.04092  | 1.60281  | 3.3603   | 88.7069  | 1079.69  | 1.25553  | 0.069289 | 0.066275 | -8.98856 | 0.729681 | 9.718239 | 0.375831 | 0.679006 | 0.376223 |
| RP11-23O13.1__pse   | 0        | 0        | 0.899438 | 0        | 3.14786  | 64.5421  | 0.653066 | 0        | 0        | -6.23377 | 0.461795 | 6.695569 | 0.394833 | 0.872029 | 0.401076 |
| RP11-23P13.6__anti  | 4.26408  | 0.860099 | 0.960825 | 3.75988  | 1.54669  | 9.30464  | 0        | 1.32883  | 2.20601  | -1.26375 | 0.783613 | 2.047359 | 0.41308  | 0.670384 | 0.204197 |
| RP11-240A16.1__lin  | 0        | 0        | 0        | 0        | 0        | 0        | 0.038611 | 0        | 0        | #DIV/0!  | #NUM!    | #NUM!    | #DIV/0!  | 0.42265  | 0.42265  |
| RP11-242D8.1__linc  | 4.76639  | 2.3707   | 1.67373  | 2.71218  | 3.13665  | 3.42246  | 2.16561  | 1.76316  | 3.95669  | -0.07349 | 0.160081 | 0.233575 | 0.905201 | 0.847944 | 0.490966 |
| RP11-242F24.1__lin  | 0        | 0.042709 | 0.181206 | 0        | 0.193261 | 4.61532  | 0.230598 | 0.019776 | 0.05909  | -4.42459 | -0.46682 | 3.957768 | 0.403391 | 0.811441 | 0.431027 |
| RP11-242J7.1__lincI | 0        | 0        | 0.67549  | 22.0863  | 1.80166  | 8.92307  | 0.782288 | 0.104008 | 0        | -5.6021  | -0.39185 | 5.210248 | 0.215324 | 0.882836 | 0.20414  |
| RP11-243E13.1__lin  | 0.077116 | 0        | 0.192548 | 0.107514 | 0.612441 | 5.74008  | 0.079311 | 0.141787 | 0.033028 | -4.58231 | 0.085617 | 4.667926 | 0.359647 | 0.95797  | 0.374315 |
| RP11-243M5.1__linc  | 0        | 0        | 0.142116 | 0.093067 | 3.34997  | 5.01609  | 0        | 0        | 0        | -5.89537 | #DIV/0!  | #DIV/0!  | 0.188187 | 0.42265  | 0.190417 |
| RP11-244H18.1__lin  | 0        | 0.059843 | 0        | 0.106218 | 0        | 0        | 0        | 0        | 0        | -0.82777 | #DIV/0!  | #DIV/0!  | 0.780386 | 0.42265  | 0.42265  |
| RP11-244H3.1__pro   | 6.73789  | 2.90751  | 2.71395  | 1.50886  | 3.66168  | 153.5    | 3.26429  | 5.15756  | 4.45345  | -3.68236 | -0.059   | 3.623356 | 0.440127 | 0.933647 | 0.435312 |

|                     |          |          |          |          |          |          |          |          |          |          |          |          |          |          |          |
|---------------------|----------|----------|----------|----------|----------|----------|----------|----------|----------|----------|----------|----------|----------|----------|----------|
| RP11-245J24.1__prc  | 0        | 0        | 1.04567  | 1.54829  | 8.3839   | 7.07746  | 0.459658 | 0.197564 | 0.268622 | -4.02385 | 0.175587 | 4.199441 | 0.117471 | 0.925143 | 0.132421 |
| RP11-246A10.1__lin  | 0.068067 | 0        | 0        | 0.266556 | 5.65124  | 8.24658  | 0.197912 | 0        | 0        | -7.7011  | -1.53983 | 6.161264 | 0.186076 | 0.42265  | 0.193433 |
| RP11-248E9.5__linc  | 0        | 0        | 0        | 0        | 0        | 0        | 0.085919 | 0        | 0        | #DIV/0!  | #NUM!    | #NUM!    | #DIV/0!  | 0.42265  | 0.42265  |
| RP11-248E9.6__linc  | 0        | 0        | 0        | 0.093294 | 0.577278 | 0.734422 | 0        | 0        | 0        | #NUM!    | #DIV/0!  | #DIV/0!  | 0.135938 | #DIV/0!  | 0.135938 |
| RP11-248G5.8__pro   | 3.56679  | 43.2203  | 2.40095  | 25.0594  | 23.5142  | 899.74   | 87.6976  | 20.7118  | 17.4666  | -4.26898 | -1.35562 | 2.913361 | 0.421805 | 0.499047 | 0.46316  |
| RP11-249C24.11__p   | 0        | 0        | 0        | 0        | 0        | 0        | 0.793336 | 0        | 0        | #DIV/0!  | #NUM!    | #NUM!    | #DIV/0!  | 0.42265  | 0.42265  |
| RP11-24C3.2__antis  | 23.6375  | 12.6386  | 8.06577  | 7.07888  | 2.47677  | 2.49398  | 12.1325  | 16.1821  | 16.199   | 1.879681 | -0.00558 | -1.88526 | 0.077548 | 0.993175 | 0.064252 |
| RP11-24F11.2__anti  | 3.81426  | 2.26448  | 2.0627   | 4.7035   | 39.9278  | 8.42713  | 2.50448  | 3.52705  | 9.96083  | -2.70423 | -0.97403 | 1.730199 | 0.321265 | 0.440745 | 0.413685 |
| RP11-24I21.1__lincF | 0        | 0        | 0.10569  | 0        | 7.45875  | 118.169  | 0.011504 | 2.13755  | 0.58693  | -10.2151 | -4.69415 | 5.520951 | 0.387396 | 0.306918 | 0.397195 |
| RP11-24J23.2__anti  | 1.64823  | 0.096751 | 3.45481  | 0        | 10.5767  | 24.626   | 0.275122 | 0.343793 | 0.06374  | -2.75916 | 2.929224 | 5.688385 | 0.268504 | 0.288772 | 0.251028 |
| RP11-24M17.4__pro   | 0        | 0.023895 | 0.21151  | 0.025486 | 2.35724  | 22.5206  | 0.520596 | 0.041966 | 0.099372 | -6.72505 | -1.49154 | 5.233507 | 0.365068 | 0.537844 | 0.379232 |
| RP11-24P14.1__linc  | 0        | 0        | 0        | 0        | 3.12484  | 6.07571  | 0        | 0        | 0        | #NUM!    | #DIV/0!  | #DIV/0!  | 0.222513 | #DIV/0!  | 0.222513 |
| RP11-251P6.1__linc  | 0.01662  | 0        | 0.066539 | 0.263406 | 7.36603  | 3.48562  | 0.14658  | 0.018157 | 0.03617  | -7.06242 | -1.27258 | 5.789841 | 0.216053 | 0.495272 | 0.223798 |
| RP11-252A24.5__an   | 0        | 0.151614 | 1.68484  | 0.090227 | 8.04428  | 6.76667  | 0.771329 | 0.138642 | 0.306088 | -3.02043 | 0.59471  | 3.615141 | 0.196503 | 0.773286 | 0.227835 |
| RP11-253D19.2__lin  | 0        | 0        | 0        | 0        | 0.73446  | 73.2715  | 0.228553 | 0        | 0        | #NUM!    | #NUM!    | 8.338969 | 0.416892 | 0.42265  | 0.418695 |
| RP11-253E3.3__pro   | 1.00871  | 1.54444  | 1.27237  | 7.66749  | 1.42817  | 13.5448  | 1.83631  | 1.08396  | 1.7046   | -2.56518 | -0.27376 | 2.291419 | 0.222029 | 0.556693 | 0.212184 |
| RP11-253I19.3__linc | 0        | 0        | 0        | 5.19603  | 6.38932  | 216.364  | 0        | 0        | 0        | #NUM!    | #DIV/0!  | #DIV/0!  | 0.392175 | #DIV/0!  | 0.392175 |
| RP11-253M7.1__ant   | 1.0792   | 0        | 0.692562 | 0        | 0        | 4.3917   | 0        | 0        | 0        | -1.30959 | #DIV/0!  | #DIV/0!  | 0.607453 | 0.202277 | 0.42265  |
| RP11-254F19.3__lin  | 0        | 0        | 0.092704 | 8.12061  | 2.0925   | 5.0685   | 0.672669 | 0        | 0        | -7.36494 | -2.85919 | 4.505756 | 0.100672 | 0.506879 | 0.088045 |
| RP11-255H23.2__ps   | 0.85304  | 49.1791  | 17.2148  | 17.4407  | 43.9205  | 58.6476  | 36.4858  | 43.9607  | 38.6021  | -0.8356  | -0.82401 | 0.01159  | 0.322141 | 0.285954 | 0.979951 |
| RP11-255I10.2__linc | 0        | 0        | 0        | 0        | 25.6035  | 2.09816  | 0        | 0        | 0        | #NUM!    | #DIV/0!  | #DIV/0!  | 0.377424 | #DIV/0!  | 0.377424 |
| RP11-255M2.2__linc  | 0        | 0        | 0        | 0        | 12.8078  | 13.7417  | 0        | 0        | 0        | #NUM!    | #DIV/0!  | #DIV/0!  | 0.184008 | #DIV/0!  | 0.184008 |
| RP11-256I9.3__lincF | 0.216222 | 0.403176 | 2.72339  | 1.53774  | 58.3691  | 18.2292  | 1.1717   | 0        | 0.591923 | -4.54686 | 0.92251  | 5.469374 | 0.280524 | 0.615363 | 0.276877 |
| RP11-256L11.1__lin  | 0        | 0        | 0.761819 | 0.365068 | 0.410244 | 0        | 0        | 0        | 0        | -0.02533 | #DIV/0!  | #DIV/0!  | 0.991705 | 0.42265  | 0.184886 |
| RP11-257A22.1__lin  | 0        | 0        | 0        | 0        | 0        | 0.246318 | 0        | 0        | 0        | #NUM!    | #DIV/0!  | #DIV/0!  | 0.42265  | #DIV/0!  | 0.42265  |
| RP11-257I14.1__ant  | 0        | 0        | 0.281472 | 0.034346 | 28.3415  | 43.9184  | 1.73302  | 0        | 0.028144 | -8.00475 | -2.64547 | 5.35928  | 0.200956 | 0.512229 | 0.220971 |
| RP11-258F22.2__lin  | 0        | 0        | 0        | 0        | 0        | 3.28931  | 0.999314 | 0        | 0        | #NUM!    | #NUM!    | 1.718775 | 0.42265  | 0.42265  | 0.615409 |
| RP11-259A24.1__lin  | 0        | 0.042168 | 0.178549 | 0.141456 | 0.682048 | 19.1562  | 0        | 0.07781  | 0        | -6.5002  | 1.504168 | 8.004364 | 0.399237 | 0.546843 | 0.40049  |
| RP11-259G18.1__ps   | 0        | 0        | 0.204656 | 0        | 0        | 0        | 0.15907  | 0.088783 | 0.08824  | #DIV/0!  | -0.71566 | #NUM!    | 0.42265  | 0.648988 | 0.04136  |
| RP11-259K15.2__lin  | 0.022811 | 0.580664 | 0.415606 | 0.326481 | 5.5531   | 124.719  | 0.133939 | 0        | 0.223074 | -7.00173 | 1.51322  | 8.514947 | 0.398627 | 0.385224 | 0.396605 |
| RP11-259O2.2__linc  | 0.080647 | 0.25699  | 0.408281 | 0.524966 | 2.59234  | 4.48942  | 0.623638 | 0.058463 | 0.311516 | -3.35019 | -0.41367 | 2.936514 | 0.161324 | 0.756036 | 0.218766 |
| RP11-259P15.4__ps   | 812.976  | 1523.75  | 588.61   | 915.713  | 710.253  | 3.56188  | 217.883  | 513.225  | 667.929  | 0.844148 | 1.064168 | 0.22002  | 0.257272 | 0.250296 | 0.864686 |
| RP11-25H12.1__linc  | 0        | 13.0566  | 3.64372  | 0        | 25.6035  | 317.01   | 0        | 3.46712  | 1.41497  | -4.35863 | 1.774305 | 6.132939 | 0.400014 | 0.306937 | 0.383668 |
| RP11-25I15.2__lincF | 0        | 0        | 0.329927 | 0        | 2.76719  | 5.44367  | 0.847273 | 0        | 0        | -4.63731 | -1.36068 | 3.276635 | 0.217455 | 0.671496 | 0.310416 |
| RP11-25K21.6__pro   | 41.949   | 415.471  | 428.942  | 250.814  | 79.2364  | 10.7538  | 33.2108  | 171.447  | 144.425  | 1.378953 | 1.344327 | -0.03463 | 0.452985 | 0.172654 | 0.982397 |



|                     |          |          |          |          |          |          |          |          |          |          |          |          |          |          |          |
|---------------------|----------|----------|----------|----------|----------|----------|----------|----------|----------|----------|----------|----------|----------|----------|----------|
| RP11-25L3.3__lincR  | 0        | 0        | 0        | 0.200216 | 18.9253  | 30.3928  | 0.080622 | 0        | 0.089495 | #NUM!    | #NUM!    | 8.185293 | 0.201503 | 0.184612 | 0.202547 |
| RP11-260E18.1__an   | 0.109497 | 0        | 0.45656  | 0.31475  | 3.0923   | 5.51829  | 2.27777  | 0.079723 | 0.059551 | -3.97889 | -2.09422 | 1.884663 | 0.186834 | 0.51551  | 0.425148 |
| RP11-260G13.1__lin  | 0        | 0        | 0        | 0        | 0        | 3.25271  | 0        | 0        | 0        | #NUM!    | #DIV/0!  | #DIV/0!  | 0.42265  | #DIV/0!  | 0.42265  |
| RP11-260M19.2__lin  | 0.051978 | 0        | 0.155537 | 1.43521  | 6.90318  | 227.522  | 0.871016 | 0.49973  | 0        | -10.1505 | -2.72368 | 7.426828 | 0.401895 | 0.309048 | 0.405206 |
| RP11-260O18.1__lin  | 0        | 0        | 1.90077  | 0        | 25.5815  | 250.796  | 0.570615 | 0        | 0        | -7.18391 | 1.735994 | 8.919907 | 0.366646 | 0.613032 | 0.368352 |
| RP11-261C10.1__lin  | 0.022975 | 0        | 0.150519 | 0.102042 | 2.25031  | 1.86354  | 0.232259 | 0        | 0.144438 | -4.60288 | -1.11852 | 3.484361 | 0.175085 | 0.439662 | 0.218093 |
| RP11-261N11.8__an   | 0        | 0.074917 | 0.20969  | 0.148017 | 1.53614  | 4.55734  | 0.335282 | 0.104152 | 0.181844 | -4.45485 | -1.12627 | 3.328581 | 0.250557 | 0.424417 | 0.295775 |
| RP11-262A12.1__lin  | 0        | 0        | 5.5391   | 4.22113  | 2.81407  | 14.2157  | 0        | 0        | 0        | -1.9398  | #DIV/0!  | #DIV/0!  | 0.097471 | 0.42265  | 0.187136 |
| RP11-262I2.2__lincF | 0        | 0.118263 | 0.499941 | 1.53201  | 0.475471 | 4.07165  | 0.341286 | 0        | 0.054115 | -3.29771 | 0.644768 | 3.942478 | 0.19215  | 0.77581  | 0.22187  |
| RP11-263K4.3__linc  | 0        | 0        | 0.111985 | 0        | 0.149676 | 0.116181 | 0.073158 | 0.030581 | 0.030466 | -1.24734 | -0.26113 | 0.986214 | 0.406697 | 0.887192 | 0.536413 |
| RP11-263K4.4__linc  | 0        | 0        | 0        | 0        | 0        | 0        | 0        | 0        | 0        | #DIV/0!  | #DIV/0!  | #DIV/0!  | #DIV/0!  | #DIV/0!  | #DIV/0!  |
| RP11-264B17.3__pri  | 2.1559   | 1.46204  | 2.05211  | 12.003   | 1.63889  | 11.3824  | 0.584986 | 3.04894  | 4.17554  | -2.1419  | -0.46186 | 1.680033 | 0.176343 | 0.599145 | 0.267881 |
| RP11-264E18.1__lin  | 0        | 0        | 0        | 0        | 0        | 1.42767  | 0        | 0        | 0        | #NUM!    | #DIV/0!  | #DIV/0!  | 0.42265  | #DIV/0!  | 0.42265  |
| RP11-265O12.1__lin  | 0        | 0.025908 | 0.241726 | 0.174652 | 18.0102  | 2.8081   | 0        | 0.023974 | 0.095497 | -6.2935  | 1.163607 | 7.457104 | 0.341358 | 0.415063 | 0.337493 |
| RP11-266E14.1__lin  | 0.135534 | 0.125623 | 0.13038  | 0.094424 | 5.45266  | 9.92119  | 0.069668 | 0.154541 | 0        | -5.30402 | 0.804305 | 6.108325 | 0.21906  | 0.35123  | 0.217483 |
| RP11-266L9.2__anti  | 0        | 0.093809 | 0.056903 | 0.090672 | 3.42662  | 3.61416  | 0.033448 | 0        | 0.037144 | -5.56433 | 1.094213 | 6.658543 | 0.17334  | 0.544421 | 0.177077 |
| RP11-266L9.4__pse   | 0.031263 | 0.036878 | 2.20063  | 0.536905 | 36.7152  | 7.73613  | 0.406692 | 0.170284 | 0.101714 | -4.30956 | 1.741086 | 6.050651 | 0.335148 | 0.570289 | 0.314778 |
| RP11-266N13.2__an   | 0        | 0        | 0        | 0        | 0        | 11.2564  | 0        | 0        | 0        | #NUM!    | #DIV/0!  | #DIV/0!  | 0.42265  | #DIV/0!  | 0.42265  |
| RP11-266O8.1__linc  | 0        | 0        | 1.30799  | 0.086703 | 49.9894  | 106.205  | 0.234449 | 0        | 0        | -6.90065 | 2.480005 | 9.380654 | 0.229999 | 0.53357  | 0.232473 |
| RP11-267C16.1__lin  | 0.050614 | 0.010817 | 0.208018 | 7.27895  | 34.7353  | 44.9238  | 0.132254 | 0        | 0.029997 | -8.33383 | 0.731784 | 9.065617 | 0.123289 | 0.684468 | 0.12429  |
| RP11-267N12.3__an   | 9.81465  | 5.88936  | 5.85585  | 8.58101  | 4.15661  | 1161.52  | 6.02335  | 13.077   | 4.81853  | -5.76726 | -0.1498  | 5.617455 | 0.424133 | 0.833747 | 0.425844 |
| RP11-268G13.1__lin  | 0        | 0.048518 | 0.205955 | 0.036445 | 0.175951 | 0.341339 | 0        | 0        | 0.029866 | -1.12168 | 3.090922 | 4.212604 | 0.08806  | 0.290028 | 0.158879 |
| RP11-268P4.5__linc  | 0        | 0        | 0.38884  | 0        | 2.53372  | 1.35117  | 0        | 0        | 0        | -3.32063 | #DIV/0!  | #DIV/0!  | 0.255273 | 0.42265  | 0.21889  |
| RP11-269F19.2__an   | 249.274  | 167.03   | 141.473  | 72.7829  | 59.3331  | 57.3809  | 131.219  | 184.19   | 163.188  | 1.557514 | 0.220877 | -1.33664 | 0.047381 | 0.622991 | 0.039516 |
| RP11-269F21.2__lin  | 0        | 0        | 0        | 0        | 2.80392  | 26.7727  | 0        | 0        | 0        | #NUM!    | #DIV/0!  | #DIV/0!  | 0.365653 | #DIV/0!  | 0.365653 |
| RP11-269F21.3__lin  | 0        | 0        | 7.73285  | 0        | 16.5406  | 169.98   | 2.07963  | 0        | 0.903454 | -4.59219 | 1.374196 | 5.966387 | 0.367071 | 0.615874 | 0.376294 |
| RP11-26F2.1__pseu   | 0        | 0        | 0        | 0        | 5.97256  | 48.7652  | 0        | 0        | 0        | #NUM!    | #DIV/0!  | #DIV/0!  | 0.356745 | #DIV/0!  | 0.356745 |
| RP11-26L16.1__lincI | 0        | 0        | 0        | 0        | 146.559  | 5.46904  | 0        | 0        | 0        | #NUM!    | #DIV/0!  | #DIV/0!  | 0.401522 | #DIV/0!  | 0.401522 |
| RP11-26L20.3__anti  | 0.038339 | 0.120558 | 2.2936   | 0.10191  | 9.53666  | 50.2345  | 2.33256  | 0        | 0.153097 | -4.60958 | -0.01938 | 4.590208 | 0.321451 | 0.993903 | 0.350724 |
| RP11-271F18.1__lin  | 0        | 0        | 0        | 0        | 0        | 0        | 0        | 0        | 0        | #DIV/0!  | #DIV/0!  | #DIV/0!  | #DIV/0!  | #DIV/0!  | #DIV/0!  |
| RP11-271K11.1__ps   | 0.053064 | 0        | 0        | 0        | 1.7082   | 6.85911  | 1.04049  | 0        | 0        | -7.33496 | -4.29338 | 3.041579 | 0.304593 | 0.42265  | 0.391779 |
| RP11-271M24.2__lin  | 0.047686 | 0        | 0        | 0.126298 | 0.406259 | 18.2292  | 0        | 0.026011 | 0.233113 | -8.62002 | -2.44201 | 6.178007 | 0.407446 | 0.489994 | 0.406546 |
| RP11-272B17.1__lin  | 0        | 0        | 0        | 0        | 0        | 0        | 0        | 0        | 0        | #DIV/0!  | #DIV/0!  | #DIV/0!  | #DIV/0!  | #DIV/0!  | #DIV/0!  |
| RP11-272J7.4__lincI | 0        | 0        | 0        | 0        | 0        | 0        | 0        | 0        | 0        | #DIV/0!  | #DIV/0!  | #DIV/0!  | #DIV/0!  | #DIV/0!  | #DIV/0!  |
| RP11-273B19.1__lin  | 0        | 0        | 0.08641  | 0        | 0        | 0.080527 | 0.083909 | 0        | 0        | 0.101736 | 0.042385 | -0.05935 | 0.42265  | 0.988008 | 0.983211 |

|                     |          |          |          |          |          |          |          |          |          |          |          |          |          |          |          |
|---------------------|----------|----------|----------|----------|----------|----------|----------|----------|----------|----------|----------|----------|----------|----------|----------|
| RP11-273B19.2__lin  | 0        | 0        | 0.047372 | 0        | 0.450871 | 0.134267 | 0.184848 | 0        | 0        | -3.62668 | -1.96425 | 1.662437 | 0.323822 | 0.584051 | 0.54277  |
| RP11-275N1.1__linc  | 0        | 0        | 0        | 0        | 5.84425  | 26.6446  | 1.16051  | 0        | 0        | #NUM!    | #NUM!    | 4.807114 | 0.31236  | 0.42265  | 0.337522 |
| RP11-277A4.4__anti  | 0.869266 | 1.92756  | 1.29787  | 4.2919   | 5.27307  | 337.008  | 1.37807  | 1.17117  | 2.58639  | -6.40326 | -0.32678 | 6.076474 | 0.41107  | 0.619241 | 0.410604 |
| RP11-277B15.2__an   | 0        | 0        | 0.301099 | 0        | 1.7501   | 189.602  | 0.404492 | 0        | 0        | -9.31178 | -0.42587 | 8.885903 | 0.417337 | 0.88162  | 0.418578 |
| RP11-277K23.1__lin  | 0        | 0        | 0        | 0        | 1.11089  | 2.10736  | 0        | 0        | 0        | #NUM!    | #DIV/0!  | #DIV/0!  | 0.220036 | #DIV/0!  | 0.220036 |
| RP11-277P12.10__li  | 0        | 0        | 0.648618 | 0        | 2.45986  | 2.75289  | 0.410227 | 0        | 0.258327 | -3.0066  | -0.04368 | 2.962929 | 0.18597  | 0.979672 | 0.25621  |
| RP11-277P12.20__a   | 0.807276 | 0.547063 | 2.85865  | 3.66299  | 1.05402  | 54.707   | 2.49893  | 0        | 0.342012 | -3.81813 | 0.568475 | 4.386605 | 0.386165 | 0.742917 | 0.399344 |
| RP11-277P12.9__lin  | 0.13353  | 0        | 0        | 0        | 0        | 0        | 0.129454 | 0        | 0        | #DIV/0!  | 0.044724 | #NUM!    | 0.42265  | 0.42265  | 0.42265  |
| RP11-278H7.1__linc  | 0.091215 | 4.35804  | 0.719716 | 1.12457  | 107.647  | 197.997  | 0.654987 | 0        | 0.356862 | -5.89113 | 2.352883 | 8.244013 | 0.218045 | 0.455671 | 0.215619 |
| RP11-278H7.3__linc  | 0        | 0        | 0        | 0        | 0        | 0.92536  | 0        | 0        | 0        | #NUM!    | #DIV/0!  | #DIV/0!  | 0.42265  | #DIV/0!  | 0.42265  |
| RP11-278H7.4__linc  | 5.23954  | 3.58332  | 22.4435  | 4.53608  | 4.35111  | 25.4183  | 2.48848  | 0.773845 | 2.79096  | -0.13383 | 2.368821 | 2.502649 | 0.443287 | 0.273688 | 0.290799 |
| RP11-279F6.1__linc  | 0.318489 | 0.522167 | 2.20063  | 11.632   | 3.65221  | 27.1604  | 1.0744   | 0.633143 | 1.46317  | -3.80283 | -0.06013 | 3.742702 | 0.175213 | 0.929629 | 0.188593 |
| RP11-279F6.3__linc  | 0        | 0.177312 | 1.16654  | 0.262689 | 11.4052  | 10.1405  | 0.746802 | 0.234415 | 0.061509 | -4.02044 | 0.366014 | 4.386451 | 0.178124 | 0.869766 | 0.203568 |
| RP11-279O17.1__lin  | 0.024556 | 0        | 0.049116 | 0.162554 | 0.183001 | 3.04569  | 0.072065 | 0.026785 | 0.026671 | -5.52455 | -0.76875 | 4.755804 | 0.362664 | 0.492428 | 0.376584 |
| RP11-279O17.2__lin  | 0        | 0.052781 | 0.044652 | 0.117675 | 1.32321  | 44.9238  | 0.610018 | 0.048604 | 0        | -8.89441 | -2.75698 | 6.137432 | 0.405033 | 0.470293 | 0.412868 |
| RP11-27G24.1__linc  | 0        | 0        | 0        | 0        | 2.43421  | 398.421  | 0        | 0        | 0        | #NUM!    | #DIV/0!  | #DIV/0!  | 0.419133 | #DIV/0!  | 0.419133 |
| RP11-27K13.3__anti  | 1.17344  | 21.8119  | 1.86472  | 55.3194  | 13.3457  | 32.9478  | 17.0535  | 2.06965  | 1.38735  | -2.03176 | 0.276887 | 2.308649 | 0.296578 | 0.90113  | 0.079479 |
| RP11-27M24.3__linc  | 0.58882  | 0        | 0.21702  | 0.845495 | 0        | 4.32391  | 0.976272 | 1.40856  | 1.17527  | -2.68143 | -2.14335 | 0.53808  | 0.387761 | 0.089828 | 0.730829 |
| RP11-280K24.4__se   | 0        | 0.00564  | 0.858802 | 0.06693  | 2.99393  | 31.6405  | 0.169423 | 0.031427 | 0.098098 | -5.32708 | 1.531871 | 6.85895  | 0.368316 | 0.581302 | 0.373063 |
| RP11-280O1.2__ant   | 0        | 0.043223 | 0.880174 | 4.67049  | 5.48231  | 248.682  | 1.35716  | 0.155571 | 0.116081 | -8.13087 | -0.8188  | 7.312068 | 0.399347 | 0.739182 | 0.402771 |
| RP11-281J9.2__anti  | 0.342034 | 0.055002 | 0.077811 | 0        | 2.12923  | 10.6844  | 0.161098 | 0.764476 | 0        | -4.75407 | -0.96289 | 3.791187 | 0.341177 | 0.646577 | 0.362857 |
| RP11-282I1.1__lincF | 0        | 2.20914  | 2.32885  | 3.00895  | 17.9124  | 337.008  | 1.11881  | 0.070243 | 0        | -6.30148 | 1.932241 | 8.233719 | 0.391064 | 0.423543 | 0.389709 |
| RP11-282I1.2__lincF | 0        | 0        | 0.471324 | 2.0999   | 1.422    | 1.25071  | 0        | 0.102111 | 0        | -3.33999 | 2.206581 | 5.546568 | 0.063993 | 0.557985 | 0.02925  |
| RP11-283C24.1__lin  | 0.030571 | 0        | 0.020391 | 0        | 0.217328 | 45.5891  | 0.059865 | 0        | 0.044315 | -9.81194 | -1.03161 | 8.780329 | 0.42029  | 0.18763  | 0.420661 |
| RP11-283G6.5__ant   | 2.87482  | 1.62571  | 1.05759  | 1.06989  | 14.7289  | 17.6396  | 0.905472 | 3.51468  | 2.32434  | -2.58884 | -0.27911 | 2.309724 | 0.241123 | 0.772329 | 0.188117 |
| RP11-283I3.6__sens  | 0.803641 | 1.14366  | 0.44409  | 0.626863 | 4.94674  | 0.221512 | 0.571172 | 1.1622   | 1.56574  | -1.27699 | -0.46423 | 0.81276  | 0.484714 | 0.542549 | 0.641219 |
| RP11-284M14.1__ar   | 8.98298  | 5.50998  | 6.14774  | 6.57372  | 25.2731  | 30.4684  | 2.97599  | 8.06875  | 6.10054  | -1.59409 | 0.26768  | 1.861773 | 0.234478 | 0.690925 | 0.132018 |
| RP11-284N8.3__linc  | 2.85824  | 0.189124 | 0.31206  | 0.401936 | 1.75245  | 20.7001  | 0.122195 | 2.64682  | 0.057134 | -2.76619 | 0.249376 | 3.015568 | 0.453482 | 0.916486 | 0.440416 |
| RP11-285A1.1__linc  | 0.033044 | 0        | 0.148828 | 0.153525 | 0.052934 | 3.11493  | 0.194288 | 0        | 0.017978 | -4.19079 | -0.22295 | 3.967839 | 0.389495 | 0.915494 | 0.420516 |
| RP11-285A18.2__se   | 0        | 0        | 0        | 0        | 8.04428  | 24.3389  | 0.635858 | 0        | 0.634584 | #NUM!    | #NUM!    | 4.671842 | 0.270634 | 0.183504 | 0.282634 |
| RP11-285B24.1__lin  | 0        | 0        | 0.100889 | 0        | 0        | 6.24162  | 0.049192 | 0        | 0        | -5.95108 | 1.036279 | 6.987359 | 0.42265  | 0.734082 | 0.427218 |
| RP11-285C1.2__linc  | 0        | 0        | 0        | 0        | 2.86999  | 95.6924  | 0.323634 | 0        | 0        | #NUM!    | #NUM!    | 8.25053  | 0.405601 | 0.42265  | 0.407556 |
| RP11-285E9.6__linc  | 0.402074 | 0.164848 | 1.75928  | 1.32003  | 14.7752  | 5.45145  | 0.437714 | 0.086977 | 1.20399  | -3.21142 | 0.428305 | 3.639722 | 0.264985 | 0.386    | 0.252916 |
| RP11-285G1.9__linc  | 0.631422 | 3.14577  | 0.720503 | 2.28842  | 2.89128  | 44.9238  | 1.45692  | 0        | 0.054211 | -3.47765 | 1.573557 | 5.051211 | 0.404759 | 0.480608 | 0.376148 |
| RP11-286B14.1__lin  | 0.057008 | 0.076284 | 1.18713  | 0.057146 | 25.6035  | 183.916  | 0.442772 | 0.095094 | 0.120964 | -7.31033 | 1.003021 | 8.313356 | 0.348322 | 0.663155 | 0.349964 |

|                     |          |          |          |          |          |          |          |          |          |          |          |          |          |          |          |
|---------------------|----------|----------|----------|----------|----------|----------|----------|----------|----------|----------|----------|----------|----------|----------|----------|
| RP11-286E11.1__an   | 8.92423  | 5.66349  | 5.71086  | 4.74869  | 546.349  | 53.9086  | 6.18271  | 7.49145  | 11.8817  | -4.8975  | -0.33228 | 4.565224 | 0.378127 | 0.566106 | 0.381039 |
| RP11-287F9.2__linc  | 0        | 0.043276 | 0.924825 | 0.048376 | 2.2347   | 16.4196  | 0        | 0        | 0.119204 | -4.27194 | 3.021725 | 7.293668 | 0.345707 | 0.392512 | 0.347887 |
| RP11-288G11.3__lin  | 0        | 0        | 0.09566  | 0        | 0.135489 | 0        | 0        | 0        | 0        | -0.50219 | #DIV/0!  | #DIV/0!  | 0.861353 | 0.42265  | 0.42265  |
| RP11-288L9.1__lincl | 0        | 0        | 0.373289 | 0        | 0        | 0        | 0        | 0        | 0        | #DIV/0!  | #DIV/0!  | #DIV/0!  | 0.42265  | 0.42265  | #DIV/0!  |
| RP11-28G8.1__antis  | 0        | 2.01349  | 0.164522 | 0.024287 | 0.754137 | 6.16558  | 0.161223 | 0.029952 | 0.039787 | -1.67276 | 3.23728  | 4.910036 | 0.551252 | 0.43624  | 0.371832 |
| RP11-290F20.1__lin  | 0.342419 | 0.349835 | 1.01246  | 0.734458 | 8.37634  | 4.67471  | 0.940336 | 0.5971   | 0.412406 | -3.01555 | -0.19383 | 2.821723 | 0.210206 | 0.839622 | 0.229855 |
| RP11-290F24.3__se   | 0        | 0        | 1.70549  | 2.23738  | 8.25355  | 162.996  | 1.19754  | 0        | 0.389321 | -6.6685  | 0.104011 | 6.772507 | 0.385959 | 0.96151  | 0.39045  |
| RP11-290F5.1__linc  | 2.27606  | 3.11941  | 1.2905   | 2.66446  | 125.674  | 380.591  | 1.79667  | 9.66255  | 1.15252  | -6.25019 | -0.91556 | 5.334626 | 0.272543 | 0.478638 | 0.27781  |
| RP11-290H9.4__anti  | 1.21644  | 1.08805  | 1.96636  | 2.93594  | 3.17413  | 438.111  | 0        | 5.73872  | 0.614153 | -6.70061 | -0.57289 | 6.127725 | 0.417623 | 0.759285 | 0.422183 |
| RP11-290K4.2__linc  | 0        | 0        | 2.61664  | 0        | 2.64843  | 43.8099  | 0.762239 | 0        | 0.238594 | -4.15015 | 1.386514 | 5.536664 | 0.386796 | 0.62643  | 0.398858 |
| RP11-290M5.2__linc  | 0        | 0        | 0.24437  | 0        | 0        | 0        | 0        | 0        | 0        | #DIV/0!  | #DIV/0!  | #DIV/0!  | 0.42265  | 0.42265  | #DIV/0!  |
| RP11-291B21.2__lin  | 5.30215  | 0.045488 | 0.346587 | 0.101632 | 0.812935 | 0        | 0        | 0.209719 | 0.34597  | 2.638339 | 3.35715  | 0.718811 | 0.476195 | 0.440734 | 0.705172 |
| RP11-292D4.1__linc  | 0        | 0        | 0.222788 | 0.097192 | 0        | 6.06947  | 0        | 0        | 5.07943  | -4.79075 | -4.51092 | 0.279823 | 0.413133 | 0.42265  | 0.369004 |
| RP11-292E2.2__linc  | 0.234379 | 0        | 0.464638 | 0        | 0        | 0        | 0.224813 | 0        | 0        | #DIV/0!  | 1.636602 | #NUM!    | 0.224494 | 0.410888 | 0.42265  |
| RP11-292F22.7__lin  | 0.027808 | 0        | 0.083405 | 0        | 0        | 0.079349 | 0.054368 | 0        | 0.030181 | 0.487041 | 0.395459 | -0.09158 | 0.34536  | 0.741201 | 0.959041 |
| RP11-293A21.1__an   | 0        | 0        | 0.513699 | 0        | 1.51011  | 0        | 0.624801 | 0.87504  | 0        | -1.55566 | -1.54581 | 0.009844 | 0.639345 | 0.522206 | 0.993345 |
| RP11-293F5.1__linc  | 0.060542 | 0.023817 | 0.181014 | 0        | 0        | 25.7566  | 0        | 0.038254 | 0.130445 | -6.60078 | 0.653571 | 7.254351 | 0.424556 | 0.303995 | 0.423512 |
| RP11-293M10.2__ar   | 0        | 0        | 0        | 0        | 18.6658  | 106.237  | 0.474086 | 0.582764 | 0.52113  | #NUM!    | #NUM!    | 6.306583 | 0.33145  | 0.00356  | 0.33613  |
| RP11-293M10.5__lin  | 0.201899 | 0        | 0.453184 | 0        | 0        | 1.29276  | 0        | 0        | 0        | -0.9807  | #DIV/0!  | #DIV/0!  | 0.573644 | 0.237666 | 0.42265  |
| RP11-293M10.6__ar   | 0.134937 | 0.016748 | 0.206325 | 0.02837  | 2.86996  | 0.12274  | 0.062763 | 0        | 0.178127 | -3.07699 | 0.571625 | 3.648614 | 0.461733 | 0.147044 | 0.440855 |
| RP11-293N14.1__lin  | 0        | 0        | 0        | 0        | 65.3479  | 4.90769  | 1.99197  | 0        | 0        | #NUM!    | #NUM!    | 5.140345 | 0.381033 | 0.42265  | 0.398861 |
| RP11-293P20.2__an   | 0.116483 | 1.50388  | 0.224745 | 0.28735  | 12.8644  | 200.636  | 2.91295  | 0.348811 | 0.554391 | -6.85633 | -1.04841 | 5.807917 | 0.390409 | 0.626098 | 0.395345 |
| RP11-294O2.2__linc  | 0.243716 | 11.4553  | 3.15913  | 2.19612  | 4.32052  | 2.30798  | 1.44302  | 3.67126  | 0.623217 | 0.751648 | 1.372761 | 0.621113 | 0.532164 | 0.363578 | 0.088919 |
| RP11-295G12.1__lin  | 0        | 0        | 2.25824  | 0        | 2.46489  | 579.152  | 0        | 0        | 0        | -8.00873 | #DIV/0!  | #DIV/0!  | 0.420188 | 0.42265  | 0.420198 |
| RP11-295G20.2__ar   | 5.38918  | 2.25791  | 3.62923  | 5.30058  | 6.09575  | 1.32114  | 2.9368   | 2.52919  | 2.69954  | -0.17352 | 0.465678 | 0.639193 | 0.814246 | 0.318835 | 0.415376 |
| RP11-295H24.3__ps   | 294.081  | 224.062  | 250.295  | 137.674  | 1136.28  | 151.997  | 119.667  | 338.642  | 29.5824  | -0.89192 | 0.655369 | 1.547292 | 0.592134 | 0.46675  | 0.329034 |
| RP11-295M18.2__lin  | 0.102762 | 0        | 0.698178 | 0.406806 | 3.2071   | 3.41738  | 0.869431 | 0        | 0        | -3.13402 | -0.11838 | 3.015645 | 0.146736 | 0.961865 | 0.244578 |
| RP11-296A18.3__lin  | 0        | 0.014819 | 0.163573 | 0.100221 | 1.49154  | 4.67471  | 0.643274 | 0.041219 | 0.082121 | -5.13453 | -2.10345 | 3.03108  | 0.259659 | 0.476675 | 0.34484  |
| RP11-296I10.3__ant  | 0        | 0.0551   | 0.958787 | 0.158252 | 1.49752  | 12.4343  | 0.620391 | 0.091243 | 0.094318 | -3.79671 | 0.331133 | 4.127843 | 0.347315 | 0.887239 | 0.3829   |
| RP11-296I10.6__pse  | 0.26625  | 7.01533  | 0.914328 | 3.9994   | 3.65104  | 3.72164  | 4.02455  | 5.14084  | 4.85877  | -0.47252 | -0.77494 | -0.30242 | 0.681438 | 0.415981 | 0.183089 |
| RP11-296O14.3__ar   | 11.3248  | 0.919681 | 2.8887   | 3.99675  | 3.13613  | 14.2177  | 1.44971  | 4.90346  | 0.538281 | -0.49656 | 1.134836 | 1.631396 | 0.737473 | 0.563641 | 0.404834 |
| RP11-297A16.2__an   | 0.055052 | 0        | 2.05495  | 0.072165 | 1.94867  | 15.2456  | 5.25883  | 0.119389 | 0.059382 | -3.03265 | -1.36573 | 1.666928 | 0.343731 | 0.655365 | 0.577166 |
| RP11-297D21.4__pr   | 0.270136 | 1.53389  | 0.044938 | 0        | 7.14957  | 0.649439 | 1.10532  | 0.642019 | 0        | -2.07657 | 0.081558 | 2.158131 | 0.392482 | 0.952013 | 0.47322  |
| RP11-297H3.4__linc  | 0        | 0        | 0.088428 | 0.253658 | 1.82697  | 38.9422  | 0.124903 | 0        | 0.300487 | -8.85771 | -2.26621 | 6.591497 | 0.392417 | 0.209518 | 0.394109 |
| RP11-298D21.2__an   | 0        | 0        | 0.09981  | 0        | 3.23072  | 0.235534 | 0        | 0        | 0        | -5.11805 | #DIV/0!  | #DIV/0!  | 0.398925 | 0.42265  | 0.382198 |

|                     |          |          |          |          |          |          |          |          |          |          |          |          |          |          |          |
|---------------------|----------|----------|----------|----------|----------|----------|----------|----------|----------|----------|----------|----------|----------|----------|----------|
| RP11-298E9.5__linc  | 0        | 0        | 0        | 0        | 2.16462  | 0        | 3.789    | 0.066721 | 0        | #NUM!    | #NUM!    | -0.83289 | 0.42265  | 0.412574 | 0.774566 |
| RP11-298E9.6__linc  | 0        | 0        | 0        | 0        | 1783.81  | 2.52705  | 0.084424 | 0        | 0        | #NUM!    | #NUM!    | 14.36898 | 0.421832 | 0.42265  | 0.42186  |
| RP11-298I3.1__antis | 8.45425  | 7.87619  | 9.14492  | 6.9561   | 16.5406  | 5.23896  | 4.6562   | 6.73686  | 6.05597  | -0.17374 | 0.545956 | 0.719695 | 0.804361 | 0.07807  | 0.355009 |
| RP11-298I3.4__antis | 3.1192   | 2.76038  | 4.08531  | 0.636149 | 26.9193  | 9.31843  | 1.17253  | 1.26984  | 1.14612  | -1.88767 | 1.473477 | 3.36115  | 0.374651 | 0.038177 | 0.286271 |
| RP11-298J20.4__sei  | 0.097548 | 26.0919  | 0.484369 | 7.15084  | 76.5948  | 17.4371  | 5.32483  | 0        | 0        | -1.92347 | 2.324617 | 4.248084 | 0.199479 | 0.53688  | 0.295666 |
| RP11-298O21.2__lin  | 0.134172 | 0        | 0.269199 | 0        | 0.092591 | 0        | 1.81678  | 0.384099 | 0.144868 | 2.12317  | -2.53987 | -4.66304 | 0.429861 | 0.35191  | 0.295199 |
| RP11-298O21.5__lin  | 0.233642 | 0.203741 | 0.229482 | 0        | 6.31962  | 6.83476  | 0.388654 | 6.60796  | 0        | -4.302   | -3.39119 | 0.910814 | 0.199362 | 0.429896 | 0.481136 |
| RP11-299G20.2__ar   | 1.2097   | 0.579791 | 1.52295  | 4.52965  | 3.69569  | 2.80327  | 0.697687 | 0.705328 | 0        | -1.73528 | 1.239364 | 2.974649 | 0.058095 | 0.31596  | 0.009582 |
| RP11-299H21.1__lin  | 0.05987  | 0.169436 | 0.263776 | 0.095512 | 0.076862 | 1.47875  | 0.176181 | 0.144026 | 0.260863 | -1.74355 | -0.23688 | 1.506665 | 0.451529 | 0.573433 | 0.494605 |
| RP11-299H22.6__lin  | 0        | 0        | 0.024952 | 0.09947  | 0.062272 | 0.159363 | 0.081513 | 0.027258 | 0        | -3.68582 | -2.12408 | 1.561745 | 0.041747 | 0.459286 | 0.253173 |
| RP11-299J3.8__anti  | 2.5201   | 3.14863  | 0.983535 | 1.46786  | 8.6326   | 132.311  | 1.3773   | 2.2694   | 2.59061  | -4.42008 | 0.092922 | 4.512997 | 0.403705 | 0.88904  | 0.394654 |
| RP11-299L17.3__lin  | 0        | 0        | 0        | 0        | 0        | 3.21934  | 0        | 0        | 0        | #NUM!    | #DIV/0!  | #DIV/0!  | 0.42265  | #DIV/0!  | 0.42265  |
| RP11-29G8.3__proc   | 2.29565  | 14.2145  | 1.91434  | 252.461  | 84.6638  | 370.709  | 374.117  | 4.06155  | 16.0494  | -5.26371 | -4.41933 | 0.844381 | 0.117783 | 0.417105 | 0.527887 |
| RP11-2A4.3__lincRN  | 0.97129  | 2.32357  | 0.087398 | 44.7707  | 167.923  | 1.79829  | 0.256327 | 0        | 0.252963 | -5.98679 | 2.731427 | 8.718221 | 0.288484 | 0.319284 | 0.288879 |
| RP11-2A4.4__lincRN  | 0.018416 | 0.115808 | 0.043052 | 0.098121 | 0.131648 | 0.01769  | 0.024116 | 0.01344  | 0.026783 | -0.48119 | 1.462213 | 1.943404 | 0.524017 | 0.371886 | 0.243524 |
| RP11-2C15.1__lincR  | 0.19721  | 0        | 0        | 0        | 3.93527  | 4.42436  | 0        | 0        | 0        | -5.40563 | #DIV/0!  | #DIV/0!  | 0.204567 | 0.42265  | 0.184897 |
| RP11-2C7.1__lincRN  | 0.072229 | 0        | 1.01226  | 0        | 0        | 5.72342  | 0.212183 | 0        | 0.216989 | -2.39986 | 1.337388 | 3.73725  | 0.431568 | 0.531453 | 0.445309 |
| RP11-2E17.1__lincR  | 0.939848 | 0        | 1.06561  | 0        | 4.07352  | 73.2715  | 0        | 0        | 0        | -5.2693  | #DIV/0!  | #DIV/0!  | 0.3986   | 0.185104 | 0.391492 |
| RP11-2H8.2__lincRN  | 2.13017  | 3.17832  | 1.40568  | 53.5938  | 4.90933  | 4.30153  | 1.55029  | 1.11505  | 1.17997  | -3.22559 | 0.804109 | 4.0297   | 0.372091 | 0.23142  | 0.348824 |
| RP11-2O17.2__antis  | 0.054246 | 0        | 0.353007 | 0.063513 | 3.84615  | 1554.35  | 0.798511 | 0        | 0.139588 | -11.9017 | -1.20382 | 10.69791 | 0.421219 | 0.604158 | 0.421496 |
| RP11-300A12.2__lin  | 0.120697 | 0        | 0.100634 | 0.133358 | 1.43265  | 1.50459  | 0.039395 | 0        | 0.043743 | -3.79424 | 1.412631 | 5.206873 | 0.179917 | 0.195951 | 0.157916 |
| RP11-300J18.1__linc | 2.4188   | 0        | 1.43849  | 0        | 0        | 5.29314  | 0.629467 | 0        | 0.160767 | -0.45654 | 2.287236 | 2.743772 | 0.817833 | 0.194631 | 0.497227 |
| RP11-300J18.3__linc | 10.7701  | 2.84683  | 3.50166  | 5.78119  | 3.79718  | 9.34685  | 0.645747 | 2.1545   | 0        | -0.14475 | 2.611938 | 2.756684 | 0.865295 | 0.229941 | 0.137226 |
| RP11-301H24.3__an   | 0        | 0        | 0        | 0        | 0        | 16.5429  | 0        | 0        | 0        | #NUM!    | #DIV/0!  | #DIV/0!  | 0.42265  | #DIV/0!  | 0.42265  |
| RP11-301J7.8__proc  | 0.097289 | 0        | 0.444797 | 0        | 1.31046  | 0        | 0        | 0        | 0.192838 | -1.27348 | 1.491132 | 2.764612 | 0.680228 | 0.253439 | 0.512855 |
| RP11-301L8.2__anti  | 0        | 1.65376  | 0        | 0        | 0        | 22.8813  | 0        | 0        | 0        | -3.79035 | #DIV/0!  | #DIV/0!  | 0.465772 | 0.42265  | 0.42265  |
| RP11-302F12.3__lin  | 0        | 0        | 0.445503 | 0        | 6.1408   | 1.95497  | 0.101599 | 0        | 0        | -4.18366 | 2.132549 | 6.31621  | 0.301524 | 0.565474 | 0.283905 |
| RP11-302I18.3__linc | 0        | 0        | 0        | 0        | 0        | 21.8928  | 0        | 0        | 0        | #NUM!    | #DIV/0!  | #DIV/0!  | 0.42265  | #DIV/0!  | 0.42265  |
| RP11-303E16.3__an   | 10.4468  | 9.02616  | 8.45808  | 3.90345  | 2.48617  | 78.8555  | 3.81038  | 13.3306  | 8.82792  | -1.60975 | 0.105084 | 1.714832 | 0.533957 | 0.856942 | 0.517048 |
| RP11-303E16.7__lin  | 0        | 0.141185 | 0.059821 | 0        | 1.93552  | 0        | 0.058478 | 0        | 0.064923 | -3.26741 | 0.703889 | 3.971296 | 0.442208 | 0.706965 | 0.460009 |
| RP11-304C12.3__lin  | 0.122028 | 0.028785 | 0.268491 | 0        | 1.21648  | 1.64462  | 0        | 0        | 0.106037 | -2.7705  | 1.983429 | 4.75393  | 0.226199 | 0.118631 | 0.189027 |
| RP11-304F15.4__lin  | 0.083499 | 0.059082 | 1.24315  | 0.088668 | 0.6653   | 5.31251  | 0.130914 | 0        | 1.51967  | -2.13021 | -0.25233 | 1.877883 | 0.343157 | 0.466662 | 0.337956 |
| RP11-304F15.7__lin  | 1.68428  | 1.20197  | 0.862008 | 2.35395  | 1.86828  | 3.9374   | 1.39656  | 1.08553  | 1.93521  | -1.12228 | -0.23694 | 0.885339 | 0.20835  | 0.654246 | 0.081873 |
| RP11-304M2.3__ant   | 0.747151 | 0        | 2.34762  | 1.37165  | 1.10726  | 2.96915  | 0        | 0.824726 | 1.49503  | -0.81591 | 0.41586  | 1.23177  | 0.039831 | 0.680822 | 0.111723 |
| RP11-305A4.3__linc  | 0        | 0.016964 | 0.201619 | 0        | 0.199889 | 1.47073  | 0.239764 | 0        | 0.109631 | -2.93413 | -0.67668 | 2.257452 | 0.346189 | 0.706548 | 0.453746 |

|                     |          |          |          |          |          |          |          |          |          |          |          |          |          |          |          |
|---------------------|----------|----------|----------|----------|----------|----------|----------|----------|----------|----------|----------|----------|----------|----------|----------|
| RP11-305E6.4__sen   | 0.770854 | 3.42022  | 0.25295  | 1.37791  | 0.338117 | 6.68169  | 0.309851 | 0.187497 | 0.098314 | -0.91813 | 2.8993   | 3.817431 | 0.680977 | 0.320345 | 0.324777 |
| RP11-305P22.9__lin  | 0.017334 | 0.091973 | 1.86576  | 0.023069 | 134.877  | 17.5893  | 4.07609  | 0.028449 | 0.056687 | -6.27066 | -1.07511 | 5.195556 | 0.359616 | 0.715989 | 0.370517 |
| RP11-307C19.1__lin  | 0        | 0        | 0.209273 | 0.072106 | 0.438178 | 3.9374   | 0.02279  | 0        | 0.050619 | -4.4096  | 1.511353 | 5.92095  | 0.348233 | 0.510608 | 0.354378 |
| RP11-307C19.3__an   | 0        | 0.020894 | 0.053191 | 0        | 2.38958  | 273.55   | 0.175009 | 0        | 0.038547 | -11.8629 | -1.52736 | 10.33552 | 0.417671 | 0.544702 | 0.417997 |
| RP11-307O13.1__lin  | 0        | 0        | 0        | 0        | 0        | 0.025474 | 0.078272 | 0        | 0.014486 | #NUM!    | #NUM!    | -1.86447 | 0.42265  | 0.32722  | 0.508513 |
| RP11-308D13.3__lin  | 0        | 0        | 0.205104 | 1.62309  | 187.864  | 0        | 0        | 0        | 0.573327 | -9.85153 | -1.483   | 8.368526 | 0.418314 | 0.42265  | 0.419448 |
| RP11-308K2.1__linc  | 0        | 0.068765 | 0        | 0        | 0        | 2.23714  | 0.113182 | 0        | 0        | -5.02384 | -0.7189  | 4.304939 | 0.44066  | 0.806361 | 0.452559 |
| RP11-309H21.2__lin  | 0        | 0        | 0        | 0        | 0        | 0        | 0        | 0        | 0        | #DIV/0!  | #DIV/0!  | #DIV/0!  | #DIV/0!  | #DIV/0!  | #DIV/0!  |
| RP11-309M7.1__linc  | 0.026615 | 0.031392 | 0.9099   | 0        | 3.49589  | 0.25329  | 0.078075 | 0        | 0        | -1.95363 | 3.631942 | 5.585576 | 0.544627 | 0.436618 | 0.395448 |
| RP11-309N17.4__an   | 0.027919 | 0        | 0.558253 | 0.147691 | 5.61752  | 3.69213  | 0.163753 | 0.060867 | 0.151506 | -4.01204 | 0.640107 | 4.652146 | 0.203911 | 0.720013 | 0.204253 |
| RP11-309N24.1__lin  | 0        | 0        | 0.077019 | 0        | 0.94927  | 0        | 0        | 0        | 0        | -3.62353 | #DIV/0!  | #DIV/0!  | 0.471231 | 0.42265  | 0.42265  |
| RP11-30K9.5__antis  | 3.47905  | 21.6586  | 2.5007   | 5.82528  | 18.8841  | 10.2839  | 3.23224  | 1.44151  | 3.02565  | -0.34041 | 1.843854 | 2.18426  | 0.505637 | 0.430827 | 0.173652 |
| RP11-30K9.6__lincR  | 0.133804 | 0.15781  | 0.223078 | 0        | 0.191801 | 3.02225  | 0.233542 | 0.133848 | 0        | -2.64261 | 0.486397 | 3.129009 | 0.443913 | 0.653629 | 0.457909 |
| RP11-30O15.1__linc  | 0        | 0        | 0.499943 | 0.472313 | 0        | 3.12967  | 0.440833 | 0.065159 | 0        | -2.84896 | -0.01735 | 2.831606 | 0.32968  | 0.994786 | 0.429015 |
| RP11-310E22.5__lin  | 0.241692 | 2.77997  | 1.14922  | 0        | 3.53625  | 5.83068  | 0.894869 | 0        | 1.86665  | -1.16722 | 0.59489  | 1.762114 | 0.368209 | 0.723648 | 0.292062 |
| RP11-310I9.1__antis | 7.04307  | 0        | 1.51129  | 15.6085  | 6.31487  | 56.3324  | 0.272691 | 0.689938 | 0        | -3.19347 | 3.151608 | 6.345073 | 0.279388 | 0.37126  | 0.239165 |
| RP11-310P5.2__anti  | 0        | 0        | 0.465062 | 0        | 0        | 0        | 0.55337  | 0.201532 | 0        | #DIV/0!  | -0.69887 | #NUM!    | 0.42265  | 0.777003 | 0.259936 |
| RP11-312B8.1__anti  | 0        | 0        | 0        | 0        | 0        | 0        | 0        | 0        | 0        | #DIV/0!  | #DIV/0!  | #DIV/0!  | #DIV/0!  | #DIV/0!  | #DIV/0!  |
| RP11-313A24.1__an   | 0        | 0        | 0        | 0        | 3.41708  | 27.1076  | 0.315251 | 0        | 0.063637 | #NUM!    | #NUM!    | 6.332063 | 0.354976 | 0.319825 | 0.361549 |
| RP11-313E19.2__an   | 0        | 0.169821 | 0.284133 | 0        | 3.53368  | 79.538   | 0        | 0        | 0        | -7.51567 | #DIV/0!  | #DIV/0!  | 0.398686 | 0.208221 | 0.397594 |
| RP11-313F23.4__lin  | 2.52122  | 0        | 0.463305 | 0        | 10.078   | 2.83782  | 0        | 0        | 0        | -2.11357 | #DIV/0!  | #DIV/0!  | 0.46194  | 0.32781  | 0.287774 |
| RP11-313J2.1__pse   | 184.371  | 9.40676  | 0.115022 | 3.58388  | 23.3512  | 4.94495  | 0.043061 | 11.119   | 6.25829  | 2.604534 | 3.476414 | 0.871879 | 0.484322 | 0.447585 | 0.347887 |
| RP11-314A5.3__pse   | 0        | 0        | 0.290745 | 0.432558 | 4.12307  | 0        | 0        | 0        | 0.053828 | -3.96982 | 2.433323 | 6.403147 | 0.407507 | 0.42265  | 0.37311  |
| RP11-314D7.1__pro   | 0        | 0        | 0        | 0        | 1.21303  | 0        | 0        | 0        | 0        | #NUM!    | #DIV/0!  | #DIV/0!  | 0.42265  | #DIV/0!  | 0.42265  |
| RP11-314D7.2__linc  | 0        | 0.009254 | 0        | 0        | 1.17223  | 1.76103  | 3.4876   | 0        | 0        | -8.30817 | -8.5579  | -0.24973 | 0.200064 | 0.424184 | 0.921539 |
| RP11-314D7.3__linc  | 0        | 0        | 0        | 0        | 0        | 0        | 0.13934  | 0        | 0        | #DIV/0!  | #NUM!    | #NUM!    | #DIV/0!  | 0.42265  | 0.42265  |
| RP11-314M24.1__lin  | 0.070118 | 0        | 0        | 0        | 6.70575  | 2.28889  | 0        | 0        | 0        | -7.00314 | #DIV/0!  | #DIV/0!  | 0.272849 | 0.42265  | 0.2671   |
| RP11-314O13.1__lin  | 0.052687 | 0.23536  | 0.129732 | 0.070077 | 14.6318  | 17.1771  | 0.491918 | 0.103371 | 0.04413  | -6.25372 | -0.61402 | 5.6397   | 0.18594  | 0.725725 | 0.197236 |
| RP11-314P15.2__lin  | 0        | 0        | 0        | 0        | 19.4659  | 165.437  | 0        | 0        | 0        | #NUM!    | #DIV/0!  | #DIV/0!  | 0.359138 | #DIV/0!  | 0.359138 |
| RP11-315A16.1__lin  | 0        | 0        | 1.04226  | 0.667219 | 0        | 1.93365  | 0.556679 | 0        | 0        | -1.31928 | 0.904798 | 2.224076 | 0.19182  | 0.762738 | 0.39064  |
| RP11-315A17.1__lin  | 0        | 0        | 0.242922 | 0        | 7.62861  | 2.80128  | 1.26229  | 0        | 0        | -5.42409 | -2.37748 | 3.046609 | 0.269038 | 0.542159 | 0.356416 |
| RP11-315F22.1__lin  | 0        | 0        | 0.126683 | 0        | 3.01386  | 4.10026  | 0        | 0        | 0        | -5.81139 | #DIV/0!  | #DIV/0!  | 0.191098 | 0.42265  | 0.192861 |
| RP11-315I20.1__ant  | 5.17065  | 3.57181  | 4.15988  | 3.16285  | 8.68162  | 16.7206  | 0.849666 | 2.96376  | 1.35226  | -1.14662 | 1.320601 | 2.46722  | 0.340328 | 0.139149 | 0.184196 |
| RP11-315L6.1__linc  | 0.326562 | 0.576672 | 60.1345  | 2.75074  | 45.4449  | 6.07427  | 0        | 0        | 0.109453 | 0.169549 | 9.123246 | 8.953697 | 0.944415 | 0.413998 | 0.319001 |
| RP11-316A16.1__lin  | 0        | 0        | 0.133742 | 0.176234 | 0        | 2.92854  | 0.130511 | 0        | 0        | -4.53696 | 0.035281 | 4.572245 | 0.38746  | 0.990018 | 0.413707 |

|                     |          |          |          |          |          |          |          |          |          |          |          |          |          |          |          |
|---------------------|----------|----------|----------|----------|----------|----------|----------|----------|----------|----------|----------|----------|----------|----------|----------|
| RP11-316E14.6__an   | 0        | 36.4126  | 1.09627  | 0        | 1.26995  | 298.418  | 2.5716   | 1.82361  | 1.66603  | -2.99816 | 2.629547 | 5.627704 | 0.49441  | 0.4766   | 0.428753 |
| RP11-316I3.1__lincF | 0        | 0        | 0        | 0        | 0        | 0        | 0        | 0        | 0        | #DIV/0!  | #DIV/0!  | #DIV/0!  | #DIV/0!  | #DIV/0!  | #DIV/0!  |
| RP11-316I3.2__lincF | 0        | 0        | 0        | 0        | 0        | 20.8468  | 0.083653 | 0        | 0        | #NUM!    | #NUM!    | 7.961193 | 0.42265  | 0.42265  | 0.424971 |
| RP11-316M20.1__lin  | 0.0392   | 0        | 0.052329 | 0.138919 | 2.90074  | 2.25354  | 0.102512 | 0        | 0.071148 | -5.85377 | -0.92397 | 4.929802 | 0.17557  | 0.282083 | 0.185787 |
| RP11-317J19.1__an   | 0.982094 | 0.104059 | 0.898115 | 8.45869  | 37.7506  | 73.2321  | 7.45973  | 2.55956  | 1.45409  | -5.91155 | -2.53161 | 3.37994  | 0.171853 | 0.211687 | 0.220289 |
| RP11-317M11.1__se   | 0        | 0        | 0.168029 | 127.229  | 18.3935  | 21.9843  | 0.905472 | 0        | 0.056236 | -9.96215 | -2.51689 | 7.445266 | 0.258601 | 0.497745 | 0.257191 |
| RP11-317N8.3__linc  | 0        | 0.360382 | 0.426038 | 0.0799   | 3.20262  | 4.81755  | 0.474227 | 0.132288 | 0.065785 | -3.36456 | 0.226195 | 3.590757 | 0.192885 | 0.896685 | 0.243815 |
| RP11-317O24.1__lin  | 0        | 0        | 0        | 0        | 1.04881  | 0.121712 | 0.041847 | 0        | 0        | #NUM!    | #NUM!    | 4.805898 | 0.359945 | 0.42265  | 0.383311 |
| RP11-317O24.2__lin  | 0        | 0        | 0        | 0        | 0        | 0        | 0        | 0        | 0        | #DIV/0!  | #DIV/0!  | #DIV/0!  | #DIV/0!  | #DIV/0!  | #DIV/0!  |
| RP11-317P15.5__lin  | 0.020667 | 0.024374 | 0.12406  | 5.88704  | 0.242395 | 21.3265  | 0.101172 | 0        | 0.08987  | -7.34309 | -0.176   | 7.167086 | 0.28391  | 0.860485 | 0.284873 |
| RP11-318A15.2__an   | 0        | 0.041867 | 0.907297 | 1.35013  | 2.08949  | 2.64538  | 0.086951 | 0.174492 | 1.08533  | -2.68053 | -0.50478 | 2.175751 | 0.013608 | 0.037176 | 0.013934 |
| RP11-318C24.2__lin  | 0.598489 | 0        | 1.16643  | 26.8624  | 4.45671  | 302.91   | 0.594562 | 1.11725  | 0        | -7.56509 | 0.044078 | 7.609169 | 0.366334 | 0.981017 | 0.368626 |
| RP11-318C4.2__pse   | 0        | 0.027446 | 0.295351 | 0.292802 | 0.282694 | 3.6315   | 0.251386 | 0        | 0.152278 | -3.70409 | -0.32253 | 3.381564 | 0.332315 | 0.839309 | 0.370984 |
| RP11-318I4.1__lincF | 0        | 0        | 0        | 0        | 1.25599  | 0        | 0        | 0        | 0        | #NUM!    | #DIV/0!  | #DIV/0!  | 0.42265  | #DIV/0!  | 0.42265  |
| RP11-318L16.6__lin  | 0        | 0        | 0        | 4.20928  | 0        | 16.7206  | 0.440455 | 0        | 0        | #NUM!    | #NUM!    | 5.570426 | 0.299172 | 0.42265  | 0.30983  |
| RP11-319E12.1__lin  | 0        | 0        | 0        | 0.44307  | 7.51255  | 22.9028  | 0        | 0        | 0.033792 | #NUM!    | #NUM!    | 9.834758 | 0.260973 | 0.42265  | 0.260798 |
| RP11-319E16.1__lin  | 0        | 0        | 0        | 0        | 2.9474   | 2.5178   | 1.12406  | 0        | 0        | #NUM!    | #NUM!    | 2.281555 | 0.186014 | 0.42265  | 0.379013 |
| RP11-319G6.1__ant   | 45.1296  | 34.275   | 25.0341  | 17.8931  | 19.7037  | 337.008  | 21.7185  | 35.0194  | 34.5273  | -1.84271 | 0.19452  | 2.037233 | 0.502454 | 0.699064 | 0.45992  |
| RP11-319G9.3__sen   | 0.298966 | 0.310234 | 0.059872 | 2.51443  | 0.102352 | 2.18815  | 1.07397  | 0.235377 | 0.143291 | -2.84428 | -1.11844 | 1.725841 | 0.224509 | 0.422282 | 0.227307 |
| RP11-31E13.2__linc  | 0        | 0        | 0        | 0        | 0        | 0.240154 | 0        | 0        | 0.207185 | #NUM!    | #NUM!    | 0.21304  | 0.42265  | 0.42265  | 0.42265  |
| RP11-31F15.1__anti  | 22.3773  | 11.4025  | 22.0248  | 7.0482   | 10.0263  | 31.6405  | 15.4287  | 9.15575  | 18.4307  | 0.196018 | 0.375539 | 0.179521 | 0.774451 | 0.0928   | 0.789968 |
| RP11-31F15.2__linc  | 3.70252  | 3.38957  | 3.55679  | 2.92965  | 2.97712  | 3.41756  | 2.54276  | 3.02222  | 5.41608  | 0.19163  | -0.04432 | -0.23595 | 0.13788  | 0.913686 | 0.530228 |
| RP11-31I22.1__sens  | 0        | 0        | 0        | 0        | 0.189509 | 2.05675  | 0        | 0.065159 | 0        | #NUM!    | #NUM!    | 5.107425 | 0.372112 | 0.42265  | 0.388859 |
| RP11-31I22.3__antis | 0.062949 | 0        | 0.600588 | 0.249461 | 11.1676  | 17.4371  | 0        | 0        | 0.27306  | -5.44246 | 1.280959 | 6.723418 | 0.19444  | 0.324057 | 0.194225 |
| RP11-320H14.1__se   | 0.106533 | 0.125714 | 0        | 0        | 0        | 0        | 1.32234  | 0.057779 | 0        | #DIV/0!  | -2.57106 | #NUM!    | 0.186274 | 0.455759 | 0.397997 |
| RP11-320N7.2__linc  | 0        | 0        | 0.767996 | 0.457341 | 1.04529  | 2.04641  | 0.638244 | 0        | 0.405783 | -2.20826 | -0.44299 | 1.76527  | 0.062957 | 0.782839 | 0.259734 |
| RP11-321A17.3__ps   | 525.217  | 359.412  | 152.869  | 131.379  | 103.47   | 56.3324  | 134.425  | 316.988  | 254.06   | 1.833118 | 0.556446 | -1.27667 | 0.101411 | 0.527733 | 0.178107 |
| RP11-321C24.1__lin  | 10.1377  | 23.0673  | 16.0773  | 6.81724  | 41.0231  | 39.0984  | 16.5481  | 12.3801  | 13.4095  | -0.81893 | 0.219127 | 1.038056 | 0.260104 | 0.685401 | 0.351157 |
| RP11-321E2.3__linc  | 0        | 0        | 9.0812   | 0        | 2.52561  | 12.7693  | 0.466858 | 0        | 0        | -0.7521  | 4.281827 | 5.033924 | 0.197428 | 0.453053 | 0.342729 |
| RP11-321E2.4__linc  | 0        | 0        | 0.378333 | 0        | 4.57227  | 12.1861  | 0.631669 | 0        | 0        | -5.46908 | -0.73951 | 4.729569 | 0.253125 | 0.801354 | 0.285489 |
| RP11-321F8.4__linc  | 0        | 0        | 0        | 0        | 0        | 3.45905  | 0        | 0        | 0        | #NUM!    | #DIV/0!  | #DIV/0!  | 0.42265  | #DIV/0!  | 0.42265  |
| RP11-321G12.1__lin  | 0.156865 | 0.267711 | 0.781628 | 3.17459  | 5.06763  | 438.263  | 0.539037 | 0.32365  | 0.056886 | -8.53206 | 0.391438 | 8.923498 | 0.412382 | 0.798492 | 0.412972 |
| RP11-322I2.1__lincF | 0        | 0        | 0        | 0        | 0        | 0        | 0        | 0        | 0        | #DIV/0!  | #DIV/0!  | #DIV/0!  | #DIV/0!  | #DIV/0!  | #DIV/0!  |
| RP11-323I1.1__lincF | 0        | 0        | 0        | 1.80471  | 1.66509  | 1.39361  | 0.421167 | 0        | 0.373368 | #NUM!    | #NUM!    | 2.613786 | 0.005497 | 0.184977 | 0.018417 |
| RP11-323I15.5__linc | 3.90187  | 15.1639  | 3.07386  | 41.955   | 15.3908  | 211.062  | 3.16868  | 7.03292  | 1.35148  | -3.59972 | 0.938354 | 4.538077 | 0.327551 | 0.267452 | 0.305184 |

|                     |          |          |          |          |          |          |          |          |          |          |          |          |          |          |          |
|---------------------|----------|----------|----------|----------|----------|----------|----------|----------|----------|----------|----------|----------|----------|----------|----------|
| RP11-324C10.1__lin  | 0        | 0        | 0        | 0        | 11.6094  | 265.443  | 1.43504  | 0        | 0        | #NUM!    | #NUM!    | 7.592924 | 0.397974 | 0.42265  | 0.401101 |
| RP11-324E6.6__linc  | 0.710623 | 0        | 1.58393  | 0        | 21.0334  | 13.9309  | 0.781766 | 0.540131 | 0.435235 | -3.9296  | 0.384991 | 4.314588 | 0.22697  | 0.755942 | 0.219066 |
| RP11-324H6.5__pse   | 0.87303  | 0.130922 | 0.456621 | 0.260353 | 1.77102  | 31.0502  | 0.172833 | 0.239215 | 0.783729 | -4.50142 | 0.288586 | 4.790008 | 0.404235 | 0.804097 | 0.39254  |
| RP11-324I22.4__ant  | 1.1008   | 1.76502  | 1.00613  | 7.02148  | 2.54827  | 5.41259  | 1.7293   | 1.14443  | 0.998244 | -1.95213 | -8.9E-06 | 1.952122 | 0.135724 | 0.999984 | 0.087944 |
| RP11-324J13.2__linc | 0        | 0        | 0        | 4.01784  | 0        | 4.79977  | 0.37088  | 0        | 0.142067 | #NUM!    | #NUM!    | 4.103506 | 0.186695 | 0.254328 | 0.189484 |
| RP11-324L3.1__linc  | 0        | 0        | 0.615319 | 2.06426  | 5.42277  | 9.83699  | 1.1013   | 0.08613  | 0        | -4.8153  | -0.94844 | 3.866859 | 0.11459  | 0.738778 | 0.170594 |
| RP11-325B23.2__lin  | 0        | 0        | 2.13478  | 0.238169 | 24.3852  | 40.2585  | 0.887042 | 0        | 0.110429 | -4.92566 | 1.097741 | 6.023397 | 0.19951  | 0.702907 | 0.214872 |
| RP11-325I22.2__linc | 0        | 0.048784 | 0.57331  | 0        | 2.0652   | 8.03212  | 0.786665 | 0.022577 | 0        | -4.0207  | -0.37944 | 3.641258 | 0.291985 | 0.889039 | 0.355861 |
| RP11-325K4.2__sen   | 1.10644  | 0.890172 | 0        | 0.396175 | 0.901284 | 46.6298  | 0.587147 | 1.36462  | 0.651687 | -4.58522 | -0.38287 | 4.202348 | 0.431372 | 0.634617 | 0.4309   |
| RP11-325N19.3__lin  | 0.054011 | 0        | 0.138999 | 0        | 0.113694 | 0.517711 | 0.15898  | 0        | 0.062295 | -1.70989 | -0.19716 | 1.512727 | 0.365776 | 0.87448  | 0.522204 |
| RP11-326A19.4__lin  | 0        | 0        | 1.77646  | 0        | 4.41265  | 32.271   | 0.562259 | 0        | 0.751483 | -4.36806 | 0.435323 | 4.803383 | 0.345918 | 0.771484 | 0.358478 |
| RP11-326C3.11__an   | 108.866  | 33.1016  | 120.941  | 105.878  | 32.1756  | 47.6673  | 6.64972  | 91.4687  | 66.9541  | 0.501425 | 0.671461 | 0.170036 | 0.392363 | 0.563807 | 0.898275 |
| RP11-326C3.2__anti  | 0.599799 | 0.272193 | 4.77048  | 4.51868  | 0.487146 | 1.90848  | 0.943466 | 10.1669  | 2.94222  | -0.29326 | -1.31644 | -1.02318 | 0.848832 | 0.517724 | 0.602597 |
| RP11-326I11.4__linc | 0.086648 | 1.01986  | 0.155604 | 1.71121  | 1.35041  | 1.84346  | 1.09325  | 1.09759  | 0.044508 | -1.95844 | -0.82466 | 1.133777 | 0.110994 | 0.446784 | 0.196726 |
| RP11-326N17.1__lin  | 0        | 0        | 0.65926  | 0.405462 | 13.2209  | 1.31204  | 0.833835 | 0        | 0.813061 | -4.50203 | -1.32083 | 3.181204 | 0.377487 | 0.327502 | 0.420283 |
| RP11-327F22.2__an   | 0        | 0        | 0.296652 | 0.293685 | 2.21838  | 6.45102  | 0.513054 | 0.323152 | 0        | -4.91715 | -1.49509 | 3.422065 | 0.235929 | 0.538516 | 0.302528 |
| RP11-328D5.1__linc  | 0        | 0        | 0.198091 | 0        | 2.29886  | 2.42362  | 0        | 0        | 0.071322 | -4.57531 | 1.473738 | 6.049048 | 0.183611 | 0.42265  | 0.183557 |
| RP11-328J6.1__anti  | 0        | 0        | 2.3268   | 0        | 1.44145  | 27.7382  | 0        | 0        | 2.89897  | -3.64854 | -0.31719 | 3.33135  | 0.390879 | 0.42265  | 0.390171 |
| RP11-328K4.1__linc  | 4.02517  | 0.133937 | 1.42585  | 0        | 38.9007  | 756.999  | 1.34576  | 24.1422  | 0.403821 | -7.1549  | -2.21288 | 4.942021 | 0.396905 | 0.515109 | 0.412527 |
| RP11-328N19.1__lin  | 0        | 0        | 0.20328  | 0.164961 | 0.157232 | 1.78368  | 0.06412  | 0        | 0.184299 | -3.37288 | -0.28931 | 3.083571 | 0.312062 | 0.610276 | 0.334016 |
| RP11-329B9.1__linc  | 0        | 0        | 0.708783 | 0        | 3.04179  | 118.169  | 0        | 0        | 0.069218 | -7.41796 | 3.356117 | 10.77407 | 0.407897 | 0.42265  | 0.407976 |
| RP11-329N22.1__lin  | 0        | 0.101965 | 0        | 0.170588 | 0        | 0.244902 | 0        | 0.14089  | 0        | -2.02674 | -0.4665  | 1.560245 | 0.426073 | 0.42265  | 0.519635 |
| RP11-32B5.7__lincR  | 1.37559  | 1.69746  | 1.48389  | 0.756915 | 4.16341  | 3.33367  | 0.88846  | 1.33415  | 1.14817  | -0.85703 | 0.434983 | 1.29201  | 0.32111  | 0.013584 | 0.211926 |
| RP11-330M19.1__lin  | 0.03358  | 0        | 0.218458 | 0.200576 | 0.089647 | 0.727481 | 0.13162  | 0        | 0.146153 | -2.0136  | -0.14026 | 1.873339 | 0.186146 | 0.878033 | 0.278657 |
| RP11-331K15.1__lin  | 0        | 0        | 0        | 0        | 0        | 3.54543  | 0.04642  | 0        | 0        | #NUM!    | #NUM!    | 6.255086 | 0.42265  | 0.42265  | 0.430258 |
| RP11-332E3.2__sen   | 0        | 0        | 0        | 0        | 0        | 3.97348  | 0        | 0        | 0        | #NUM!    | #DIV/0!  | #DIV/0!  | 0.42265  | #DIV/0!  | 0.42265  |
| RP11-332H14.2__lin  | 0.481602 | 0        | 0.753221 | 0.731159 | 0.371118 | 0.364834 | 0.431294 | 0.49     | 0.534236 | -0.24867 | -0.23724 | 0.011433 | 0.773585 | 0.763616 | 0.981649 |
| RP11-332H18.4__an   | 0.161161 | 0        | 0.181401 | 0        | 0.257807 | 0.538379 | 0.177532 | 0.065979 | 0.087611 | -1.21674 | 0.049001 | 1.265742 | 0.441463 | 0.942981 | 0.484699 |
| RP11-332H18.5__an   | 1.30302  | 0.783476 | 2.30478  | 1.07415  | 3.44399  | 12.7092  | 1.12345  | 1.1897   | 1.03476  | -1.97199 | 0.391379 | 2.363367 | 0.310076 | 0.552275 | 0.326059 |
| RP11-332J15.1__linc | 0        | 0        | 0.204357 | 0        | 0        | 6.7358   | 0.066289 | 0        | 0        | -5.04269 | 1.624246 | 6.666932 | 0.42265  | 0.628963 | 0.428359 |
| RP11-332J15.2__linc | 0        | 0        | 0.339768 | 0        | 0.428631 | 0.813311 | 1.58364  | 0        | 0        | -1.86998 | -2.22062 | -0.35065 | 0.184513 | 0.55661  | 0.892265 |
| RP11-333E1.1__anti  | 2.95219  | 2.01315  | 4.5328   | 1.17396  | 5.35723  | 17.4485  | 1.09333  | 25.0926  | 1.36582  | -1.3361  | -1.53643 | -0.20033 | 0.378812 | 0.553985 | 0.918993 |
| RP11-333E13.4__ps   | 0        | 0        | 0        | 0.84616  | 8.6326   | 0        | 0        | 0        | 0        | #NUM!    | #DIV/0!  | #DIV/0!  | 0.369082 | #DIV/0!  | 0.369082 |
| RP11-333O1.1__linc  | 0        | 0.049229 | 0.458277 | 0        | 0        | 0.512728 | 0.081338 | 0.136088 | 0.225724 | -0.01477 | 0.195629 | 0.210397 | 0.958929 | 0.857766 | 0.877485 |
| RP11-334A14.8__an   | 0        | 0.038133 | 0.591898 | 0        | 0.166935 | 14.6577  | 0.486589 | 0        | 0        | -4.55643 | 0.37272  | 4.929149 | 0.417387 | 0.892051 | 0.435588 |

|                    |          |          |          |          |          |          |          |          |          |          |          |          |          |          |          |
|--------------------|----------|----------|----------|----------|----------|----------|----------|----------|----------|----------|----------|----------|----------|----------|----------|
| RP11-334C17.5__an  | 0.198816 | 0        | 0.384376 | 0.531939 | 1.02366  | 21.9843  | 0.190839 | 0.226768 | 0.346789 | -5.33499 | -0.39035 | 4.944644 | 0.387145 | 0.545139 | 0.392772 |
| RP11-334L9.1__pse  | 0        | 0        | 0        | 2.14195  | 1.69137  | 0        | 0        | 0        | 0        | #NUM!    | #DIV/0!  | #DIV/0!  | 0.189086 | #DIV/0!  | 0.189086 |
| RP11-335E6.2__linc | 0        | 0        | 0.533673 | 0        | 10.9934  | 17.6396  | 1.20227  | 0        | 0        | -5.74558 | -1.17173 | 4.573846 | 0.202162 | 0.706541 | 0.239316 |
| RP11-335K5.2__anti | 0.015325 | 0.036145 | 0.182584 | 0.322599 | 12.0927  | 0.205232 | 0.178687 | 0.066408 | 0        | -5.75279 | -0.0665  | 5.686286 | 0.407044 | 0.974177 | 0.406017 |
| RP11-335O4.1__linc | 0        | 0        | 0.598866 | 0        | 0.235623 | 17.7879  | 0        | 0        | 0        | -4.9115  | #DIV/0!  | #DIV/0!  | 0.414791 | 0.42265  | 0.415053 |
| RP11-335O4.3__ant  | 0.749044 | 4.02598  | 1.71348  | 2.66828  | 4.76789  | 119.846  | 1.98099  | 7.22059  | 1.15054  | -4.294   | -0.67397 | 3.620032 | 0.409733 | 0.357138 | 0.431368 |
| RP11-336A10.4__lin | 0        | 0        | 0.108514 | 0        | 0.970421 | 4.35511  | 0.317317 | 0        | 0        | -5.61697 | -1.54804 | 4.068929 | 0.30854  | 0.640527 | 0.353594 |
| RP11-336K24.5__an  | 2.607    | 0        | 0        | 2.89605  | 12.136   | 22.8813  | 1.65397  | 9.30063  | 1.95259  | -3.86224 | -2.30771 | 1.554531 | 0.213032 | 0.377365 | 0.317591 |
| RP11-337C18.10__p  | 14.683   | 6.33602  | 8.99218  | 9.48209  | 2.98377  | 18.3927  | 5.44065  | 10.5278  | 6.68438  | -0.04017 | 0.40581  | 0.445979 | 0.95653  | 0.591802 | 0.673333 |
| RP11-337C18.8__an  | 74.7583  | 48.9957  | 69.558   | 46.3641  | 18.0121  | 34.3314  | 27.0166  | 57.4736  | 35.9459  | 0.969698 | 0.682663 | -0.28703 | 0.003965 | 0.286857 | 0.71475  |
| RP11-337L12.1__lin | 0.046913 | 0        | 0        | 0.06166  | 0.346628 | 0.221202 | 0        | 0.05095  | 0.101394 | -3.74611 | -1.69926 | 2.046848 | 0.182542 | 0.504274 | 0.152193 |
| RP11-338C15.5__an  | 0.038286 | 0.030098 | 0.306668 | 0.118733 | 0.218386 | 0.366654 | 0.175227 | 0.055811 | 0.111191 | -0.90802 | 0.132129 | 1.040149 | 0.110483 | 0.921057 | 0.322351 |
| RP11-338K17.8__lin | 0        | 0        | 0        | 0        | 0        | 6.9218   | 0        | 0        | 0        | #NUM!    | #DIV/0!  | #DIV/0!  | 0.42265  | #DIV/0!  | 0.42265  |
| RP11-338L18.1__lin | 0        | 0        | 0        | 0        | 0        | 0        | 0        | 0        | 0        | #DIV/0!  | #DIV/0!  | #DIV/0!  | #DIV/0!  | #DIV/0!  | #DIV/0!  |
| RP11-338O1.2__linc | 0        | 1.64736  | 0.203609 | 0.52963  | 1.55781  | 0        | 0        | 0        | 0        | -0.17345 | #DIV/0!  | #DIV/0!  | 0.762332 | 0.35619  | 0.267535 |
| RP11-339A11.2__lin | 0.015275 | 0        | 0.076451 | 0        | 0.709115 | 0.204563 | 0.0549   | 0        | 0.033252 | -3.31629 | 0.057333 | 3.373624 | 0.341588 | 0.964802 | 0.348507 |
| RP11-339D23.1__lin | 0        | 0        | 0        | 0        | 0        | 0        | 0.372557 | 0        | 0        | #DIV/0!  | #NUM!    | #NUM!    | #DIV/0!  | 0.42265  | 0.42265  |
| RP11-33A14.1__linc | 0.057102 | 0        | 1.48635  | 0.075856 | 7.29561  | 12.1792  | 0.097972 | 0        | 0.031084 | -3.66299 | 3.580099 | 7.243085 | 0.19685  | 0.439085 | 0.208703 |
| RP11-33B1.1__pseu  | 15.7694  | 26.2032  | 33.6645  | 26.2274  | 147.139  | 91.5893  | 9.42896  | 68.0847  | 14.7892  | -1.80859 | -0.28728 | 1.521304 | 0.187334 | 0.792513 | 0.105919 |
| RP11-33B1.4__lincR | 0        | 0        | 0        | 0        | 0        | 0        | 0        | 0        | 0        | #DIV/0!  | #DIV/0!  | #DIV/0!  | #DIV/0!  | #DIV/0!  | #DIV/0!  |
| RP11-33N16.3__pro  | 7.73931  | 9.10087  | 3.93072  | 131.305  | 109.92   | 274.468  | 2.80379  | 4.86813  | 4.71359  | -4.63388 | 0.74591  | 5.379787 | 0.090116 | 0.260747 | 0.082538 |
| RP11-340A13.2__lin | 1.14929  | 1.57345  | 0.897863 | 0.163659 | 1.86945  | 3.24817  | 0        | 0        | 0        | -0.54466 | #DIV/0!  | #DIV/0!  | 0.62631  | 0.02566  | 0.187175 |
| RP11-340A13.3__lin | 0        | 0        | 0        | 0        | 0        | 7.60451  | 0        | 0        | 0        | #NUM!    | #DIV/0!  | #DIV/0!  | 0.42265  | #DIV/0!  | 0.42265  |
| RP11-340B18.1__lin | 0        | 0        | 0.138694 | 0.055125 | 8.37634  | 11.8464  | 0.116349 | 0.02162  | 0.129191 | -7.19186 | -0.9458  | 6.246057 | 0.192304 | 0.375262 | 0.197188 |
| RP11-341G5.1__linc | 0        | 0        | 1.70993  | 3.13597  | 27.5969  | 579.152  | 0.627836 | 0.014647 | 0        | -8.47846 | 1.412207 | 9.890663 | 0.392624 | 0.661677 | 0.393346 |
| RP11-342C24.8__lin | 0.016468 | 0        | 0        | 0        | 0        | 0        | 0.069705 | 0.04469  | 0.264119 | #DIV/0!  | -4.52264 | #NUM!    | 0.42265  | 0.234645 | 0.210476 |
| RP11-342M1.3__ant  | 1.9208   | 2.6083   | 0.874584 | 1.6815   | 7.68692  | 8.95763  | 1.41948  | 1.91204  | 1.69361  | -1.76188 | 0.104782 | 1.866663 | 0.218698 | 0.815738 | 0.172805 |
| RP11-342M3.5__ant  | 0.135298 | 0.059833 | 2.11527  | 0.134684 | 0.108353 | 2.63515  | 0.635291 | 0.110851 | 0.036803 | -0.31702 | 1.561161 | 1.878178 | 0.372177 | 0.587593 | 0.542847 |
| RP11-343D2.11__an  | 0        | 0        | 0        | 0        | 2.19237  | 9.31843  | 0.204879 | 0        | 0        | #NUM!    | #NUM!    | 5.812072 | 0.30577  | 0.42265  | 0.318283 |
| RP11-343H19.2__pr  | 20.2777  | 1.26723  | 1.3631   | 0.553208 | 1.69141  | 2.56794  | 1.44374  | 9.09858  | 2.40193  | 2.250978 | 0.823542 | -1.42744 | 0.471439 | 0.718337 | 0.370864 |
| RP11-344E13.3__an  | 21.2548  | 12.266   | 10.4289  | 11.7051  | 16.186   | 73.1973  | 5.40122  | 19.4948  | 9.57241  | -1.20169 | 0.350578 | 1.55227  | 0.481399 | 0.686212 | 0.399221 |
| RP11-344G13.1__lin | 0        | 0        | 0.102676 | 0.032258 | 0.164308 | 0.007752 | 0.063099 | 0        | 0.035227 | -0.99272 | 0.062448 | 1.055166 | 0.69512  | 0.972811 | 0.638802 |
| RP11-344L13.2__lin | 0        | 0        | 0        | 0        | 0        | 0        | 0        | 0        | 0        | #DIV/0!  | #DIV/0!  | #DIV/0!  | #DIV/0!  | #DIV/0!  | #DIV/0!  |
| RP11-344N10.5__lin | 0.595012 | 1.02692  | 0.252846 | 0.324628 | 0.303076 | 4.51128  | 0.419008 | 0.315165 | 1.16632  | -1.45476 | -0.01965 | 1.435109 | 0.564556 | 0.987325 | 0.441253 |
| RP11-344P13.1__lin | 0.935599 | 0        | 0.585812 | 0        | 0.841439 | 0.987199 | 0        | 0        | 0        | -0.26536 | #DIV/0!  | #DIV/0!  | 0.865703 | 0.204263 | 0.186085 |



|                     |          |          |          |          |          |          |          |          |          |          |          |          |          |          |          |         |
|---------------------|----------|----------|----------|----------|----------|----------|----------|----------|----------|----------|----------|----------|----------|----------|----------|---------|
| RP11-345F18.1__lin  | 0        | 0        | 0        | 0        | 0        | 0        | 0        | 0        | 0        | 0        | #DIV/0!  | #DIV/0!  | #DIV/0!  | #DIV/0!  | #DIV/0!  | #DIV/0! |
| RP11-345J4.8__psei  | 1.01817  | 10.458   | 1.97105  | 27.9477  | 30.9655  | 7.12042  | 11.11    | 10.0458  | 9.1277   | -2.29589 | -1.17122 | 1.124669 | 0.113256 | 0.214746 | 0.233527 |         |
| RP11-345M22.1__lin  | 0.183525 | 0.548907 | 1.0297   | 2.2109   | 34.1393  | 26.3811  | 4.66198  | 0.31367  | 0        | -5.15379 | -1.49756 | 3.656229 | 0.16452  | 0.596784 | 0.22393  |         |
| RP11-346D14.1__lin  | 0.037231 | 0.073789 | 0.205389 | 0.126033 | 4.33054  | 24.1827  | 0.132822 | 0.016486 | 0.008784 | -6.50006 | 1.001027 | 7.501087 | 0.328517 | 0.595551 | 0.330358 |         |
| RP11-347C12.2__ps   | 9.77915  | 38.9296  | 8.1475   | 8.98211  | 96.7587  | 52.1068  | 15.9336  | 13.4548  | 32.6541  | -1.47314 | -0.12594 | 1.347204 | 0.197363 | 0.916549 | 0.355528 |         |
| RP11-347D21.3__lin  | 0        | 0        | 1.31235  | 0        | 600.983  | 1.17327  | 0.568769 | 0.421084 | 0        | -8.84184 | 0.406866 | 9.248708 | 0.422783 | 0.875121 | 0.42207  |         |
| RP11-347K2.1__linc  | 0        | 0        | 0        | 0        | 0        | 0        | 0        | 0        | 0        | #DIV/0!  | #DIV/0!  | #DIV/0!  | #DIV/0!  | #DIV/0!  | #DIV/0!  |         |
| RP11-348J12.2__an   | 0        | 0        | 0        | 0        | 1.16498  | 4.03679  | 0        | 0        | 0        | #NUM!    | #DIV/0!  | #DIV/0!  | 0.285202 | #DIV/0!  | 0.285202 |         |
| RP11-348J24.2__linc | 0        | 0        | 0.142839 | 0.039618 | 100.521  | 131.998  | 0.586125 | 0        | 0.032455 | -10.669  | -2.11457 | 8.55442  | 0.190689 | 0.539477 | 0.192777 |         |
| RP11-349A22.5__an   | 58.5485  | 45.8541  | 37.2222  | 36.9704  | 12.8176  | 86.8553  | 44.1748  | 35.0499  | 44.7112  | 0.051659 | 0.19248  | 0.140821 | 0.954641 | 0.475699 | 0.847757 |         |
| RP11-349I1.2__antis | 0.065815 | 0.019404 | 1.07681  | 0.956953 | 5.56069  | 4.98686  | 0.226585 | 0.08988  | 0.068615 | -3.30748 | 1.593414 | 4.900894 | 0.12704  | 0.561669 | 0.131605 |         |
| RP11-34C15.2__linc  | 0        | 0        | 0.458128 | 0        | 1.02241  | 3.69213  | 0        | 0        | 0.055092 | -3.36329 | 3.055839 | 6.419133 | 0.275469 | 0.42265  | 0.28795  |         |
| RP11-34D15.2__anti  | 0        | 0        | 1.07675  | 0.110767 | 1.05846  | 3.08972  | 0.700753 | 0.091985 | 0.274241 | -1.98381 | 0.013152 | 1.996965 | 0.193125 | 0.994725 | 0.392719 |         |
| RP11-34F13.2__linc  | 0        | 0.017857 | 0.242523 | 0.04022  | 0        | 2.09697  | 0.118745 | 0        | 1.33353  | -3.03703 | -2.47963 | 0.5574   | 0.415852 | 0.373047 | 0.484753 |         |
| RP11-34F13.3__proc  | 0.03195  | 0.113021 | 2.66515  | 0.169973 | 3.95446  | 16.5219  | 0.428333 | 0        | 0.092834 | -2.87718 | 2.430815 | 5.307997 | 0.283886 | 0.492721 | 0.31248  |         |
| RP11-34P13.13__pri  | 0.13123  | 1.85802  | 1.69796  | 4.61993  | 1.10587  | 4.07688  | 1.00586  | 2.92251  | 3.32759  | -1.41065 | -0.97664 | 0.43401  | 0.312479 | 0.034465 | 0.642579 |         |
| RP11-34P13.7__linc  | 0.115136 | 0.308318 | 1.58251  | 2.14891  | 1.47403  | 11.4514  | 1.32959  | 0.15482  | 0.350233 | -2.90973 | 0.128796 | 3.038524 | 0.256169 | 0.943054 | 0.318069 |         |
| RP11-34P13.9__linc  | 0        | 0        | 0.715778 | 0        | 0        | 0        | 0.007168 | 0        | 0        | #DIV/0!  | 6.641888 | #NUM!    | 0.42265  | 0.42846  | 0.42265  |         |
| RP11-350F4.2__linc  | 3.39305  | 2.6197   | 2.71505  | 38.3565  | 0.757321 | 0.590191 | 1.65227  | 4.60728  | 4.7221   | -2.18559 | -0.3314  | 1.85419  | 0.490153 | 0.607816 | 0.553458 |         |
| RP11-350G24.2__ps   | 30.1059  | 63.228   | 17.6688  | 9.71896  | 30.8364  | 10.8521  | 36.8206  | 18.456   | 17.2619  | 1.110545 | 0.613776 | -0.49677 | 0.114937 | 0.509497 | 0.5997   |         |
| RP11-351N6.1__linc  | 0        | 0        | 0        | 0        | 2.63045  | 1.20509  | 0        | 0        | 0        | #NUM!    | #DIV/0!  | #DIV/0!  | 0.234643 | #DIV/0!  | 0.234643 |         |
| RP11-351O2.1__linc  | 0        | 0        | 0        | 0        | 0.35466  | 0        | 0.328276 | 0        | 0        | #NUM!    | #NUM!    | 0.111527 | 0.42265  | 0.42265  | 0.96848  |         |
| RP11-352B15.2__lin  | 0        | 0        | 0.023766 | 0        | 0        | 0.271712 | 0        | 0        | 0        | -3.51511 | #DIV/0!  | #DIV/0!  | 0.42265  | 0.42265  | 0.42265  |         |
| RP11-352D13.5__lin  | 0        | 0        | 0        | 0        | 22.3989  | 16.125   | 0        | 0.131492 | 0        | #NUM!    | #NUM!    | 8.194635 | 0.19412  | 0.42265  | 0.193757 |         |
| RP11-352D13.6__pr   | 0        | 0        | 0.196637 | 0.08158  | 1.0788   | 0.211627 | 0.168544 | 0.067103 | 0.040107 | -2.80268 | -0.48784 | 2.314837 | 0.372819 | 0.809363 | 0.385401 |         |
| RP11-352M15.1__lin  | 0        | 0        | 1.36854  | 2.3848   | 122.616  | 45.5891  | 0        | 0        | 0        | -6.96175 | #DIV/0!  | #DIV/0!  | 0.250583 | 0.42265  | 0.247239 |         |
| RP11-353N14.4__lin  | 0        | 0        | 0.54994  | 0.222856 | 1.80729  | 1.45332  | 0.679769 | 0.795175 | 0        | -2.66318 | -1.42331 | 1.239863 | 0.166806 | 0.548131 | 0.365985 |         |
| RP11-353N14.5__lin  | 0.054467 | 0.308256 | 0.206469 | 0.168598 | 0.363593 | 3.79721  | 0.142784 | 0        | 0.166373 | -2.92718 | 0.880576 | 3.807756 | 0.395778 | 0.53542  | 0.363926 |         |
| RP11-353N4.1__linc  | 0        | 0        | 0        | 0        | 0        | 0        | 0        | 0        | 0        | #DIV/0!  | #DIV/0!  | #DIV/0!  | #DIV/0!  | #DIV/0!  | #DIV/0!  |         |
| RP11-353N4.5__linc  | 6.28095  | 10.8394  | 5.0078   | 8.03253  | 134.877  | 12.4692  | 2.45317  | 5.65136  | 2.15404  | -2.81183 | 1.109053 | 3.920887 | 0.380947 | 0.028046 | 0.35429  |         |
| RP11-354E11.2__an   | 0        | 0        | 4.34375  | 0        | 1.79189  | 54.7378  | 2.18493  | 0.048634 | 0.048431 | -3.702   | 0.928646 | 4.630642 | 0.402498 | 0.753005 | 0.428059 |         |
| RP11-354H21.1__lin  | 0        | 0        | 0        | 0        | 0        | 0        | 0        | 0        | 0        | #DIV/0!  | #DIV/0!  | #DIV/0!  | #DIV/0!  | #DIV/0!  | #DIV/0!  |         |
| RP11-354H21.2__lin  | 0        | 0        | 0        | 0        | 0        | 0        | 0        | 0        | 0        | #DIV/0!  | #DIV/0!  | #DIV/0!  | #DIV/0!  | #DIV/0!  | #DIV/0!  |         |
| RP11-354K1.1__linc  | 0        | 0        | 0.303558 | 0.082738 | 3.60986  | 41.0654  | 0.368392 | 0.279801 | 0.17158  | -7.20403 | -1.43325 | 5.770777 | 0.372804 | 0.380459 | 0.38173  |         |
| RP11-354O24.1__lin  | 0        | 0        | 0        | 0        | 0        | 0.120615 | 0        | 0        | 0        | #NUM!    | #DIV/0!  | #DIV/0!  | 0.42265  | #DIV/0!  | 0.42265  |         |

|                     |          |          |          |          |          |          |          |          |          |          |          |          |          |          |          |
|---------------------|----------|----------|----------|----------|----------|----------|----------|----------|----------|----------|----------|----------|----------|----------|----------|
| RP11-355F22.1__lin  | 0        | 0        | 0        | 0.352468 | 0.141549 | 0.395557 | 0.483137 | 0        | 0.338025 | #NUM!    | #NUM!    | 0.115448 | 0.063453 | 0.195961 | 0.803541 |
| RP11-355I22.2__linc | 0        | 0        | 0.018286 | 0        | 5.65124  | 0.087281 | 0        | 0        | 0        | -8.29377 | #DIV/0!  | #DIV/0!  | 0.415645 | 0.42265  | 0.413803 |
| RP11-355N15.1__an   | 0        | 0.063231 | 0.053684 | 0.071252 | 9.99438  | 106.237  | 0.131452 | 0.058617 | 0.102181 | -9.95821 | -1.32174 | 8.636467 | 0.371009 | 0.277906 | 0.371676 |
| RP11-356J5.12__prc  | 1.35738  | 1.4388   | 2.55481  | 4.45374  | 66.5216  | 65.8776  | 3.23181  | 1.21035  | 0.47348  | -4.67668 | 0.122427 | 4.799103 | 0.164379 | 0.91056  | 0.175943 |
| RP11-356J5.4__anti  | 0.549433 | 0.899132 | 1.138    | 0        | 1.89353  | 4.04025  | 0.862693 | 0.53315  | 0.596318 | -1.19791 | 0.376703 | 1.574617 | 0.379946 | 0.52659  | 0.401455 |
| RP11-356O9.1__linc  | 0.566541 | 0        | 0        | 1.1186   | 0.755266 | 2.46044  | 0        | 2.6483   | 0        | -2.93555 | -2.22481 | 0.710734 | 0.173602 | 0.556202 | 0.705007 |
| RP11-357F12.1__lin  | 0.041295 | 0        | 0.20616  | 0        | 1.08538  | 32.271   | 0.589102 | 0        | 0        | -7.07466 | -1.25135 | 5.823301 | 0.404192 | 0.663002 | 0.4142   |
| RP11-357G3.2__pse   | 0        | 0.323953 | 0        | 0.33603  | 0        | 3.86713  | 0        | 0        | 0        | -3.69762 | #DIV/0!  | #DIV/0!  | 0.42502  | 0.42265  | 0.374837 |
| RP11-357K6.1__linc  | 0        | 0        | 0        | 0        | 0.474664 | 1.18408  | 0        | 0.196993 | 0        | #NUM!    | #NUM!    | 3.073875 | 0.24928  | 0.42265  | 0.306084 |
| RP11-357K6.3__linc  | 0        | 0        | 0        | 0        | 12.0587  | 337.008  | 0.763668 | 0        | 0.225249 | #NUM!    | #NUM!    | 8.463438 | 0.402374 | 0.2829   | 0.40367  |
| RP11-358H9.1__linc  | 0        | 0        | 1.02741  | 0.205291 | 0        | 0        | 0        | 0        | 0        | 2.32327  | #DIV/0!  | #DIV/0!  | 0.546968 | 0.42265  | 0.42265  |
| RP11-359D24.1__lin  | 0        | 0        | 1.94071  | 0        | 9.99438  | 10.1756  | 0        | 0        | 0        | -3.37755 | #DIV/0!  | #DIV/0!  | 0.18728  | 0.42265  | 0.183536 |
| RP11-359E8.5__sen   | 0        | 0        | 0.147351 | 4.24931  | 0        | 2.02369  | 0.239524 | 0        | 0        | -5.41183 | -0.70091 | 4.710913 | 0.238635 | 0.810766 | 0.224442 |
| RP11-359G22.2__lin  | 0.076994 | 0.193112 | 0.089937 | 0.119385 | 0        | 2.45734  | 0.42789  | 0        | 0.097827 | -2.8393  | -0.54612 | 2.293179 | 0.461282 | 0.76123  | 0.502374 |
| RP11-359J14.2__linc | 1.50376  | 1.33073  | 1.21928  | 0.802909 | 3.13665  | 6.37117  | 5.75599  | 2.09245  | 1.625    | -1.34681 | -1.22462 | 0.122186 | 0.343672 | 0.278843 | 0.930334 |
| RP11-359K18.3__an   | 0        | 0.070216 | 0        | 0        | 0.15812  | 49.4162  | 0.261756 | 0.377949 | 0.096869 | -9.46357 | -3.39095 | 6.072618 | 0.421624 | 0.073965 | 0.428301 |
| RP11-359M6.1__linc  | 0        | 0        | 1.76867  | 2.26321  | 1.15496  | 6.8234   | 0.95193  | 0.791937 | 0.731083 | -2.5337  | -0.48473 | 2.048966 | 0.135324 | 0.747592 | 0.281677 |
| RP11-35D5.1__pseu   | 0        | 0        | 0        | 0        | 0        | 3.53938  | 0        | 0        | 0        | #NUM!    | #DIV/0!  | #DIV/0!  | 0.42265  | #DIV/0!  | 0.42265  |
| RP11-35G9.3__antis  | 0.887827 | 0.065482 | 0        | 37.1816  | 1.94425  | 6.15376  | 0.215698 | 1.51015  | 0.478783 | -5.56977 | -1.20952 | 4.360252 | 0.305697 | 0.565769 | 0.335071 |
| RP11-35J23.1__anti  | 0        | 0        | 0.031263 | 0.124418 | 0        | 9.67784  | 0.091838 | 0        | 0        | -8.2925  | -1.55463 | 6.737876 | 0.415252 | 0.639504 | 0.420709 |
| RP11-35L17.3__lincl | 0        | 0        | 0        | 0        | 0        | 0        | 0        | 0        | 0        | #DIV/0!  | #DIV/0!  | #DIV/0!  | #DIV/0!  | #DIV/0!  | #DIV/0!  |
| RP11-360K13.1__lin  | 0        | 0        | 0        | 0        | 29.883   | 51.6337  | 0.592784 | 0        | 0        | #NUM!    | #NUM!    | 7.103445 | 0.211104 | 0.42265  | 0.216879 |
| RP11-360P21.2__lin  | 0        | 0        | 0        | 0        | 2.38625  | 1.00474  | 0        | 0        | 0        | #NUM!    | #DIV/0!  | #DIV/0!  | 0.243848 | #DIV/0!  | 0.243848 |
| RP11-361D14.2__lin  | 0        | 0.055657 | 0.01891  | 0.050243 | 2.27359  | 0.090543 | 0        | 0        | 0.051445 | -5.01697 | 0.535495 | 5.55247  | 0.391398 | 0.792935 | 0.400198 |
| RP11-361H10.3__se   | 0.585732 | 1.03123  | 2.01012  | 6.22019  | 3.03705  | 389.456  | 2.15305  | 1.50771  | 0        | -6.7804  | -0.01333 | 6.767065 | 0.411335 | 0.992502 | 0.41439  |
| RP11-361I14.2__ant  | 0        | 0        | 0.149394 | 0        | 0.127032 | 0        | 0.058416 | 0        | 0        | 0.23393  | 1.354699 | 1.120769 | 0.934163 | 0.672546 | 0.716665 |
| RP11-361L15.4__prc  | 8.79494  | 9.07438  | 7.91211  | 5.12349  | 192.227  | 7.16896  | 20.4902  | 22.2522  | 4.81476  | -2.98783 | -0.88333 | 2.104504 | 0.436684 | 0.297222 | 0.469065 |
| RP11-362A1.1__linc  | 0        | 0        | 0.091193 | 0        | 1.86582  | 48.7652  | 0        | 0        | 0        | -9.11688 | #DIV/0!  | #DIV/0!  | 0.400958 | 0.42265  | 0.400998 |
| RP11-362F19.1__lin  | 0.051807 | 0.085524 | 117.225  | 0.027564 | 0.26245  | 22.8602  | 0.020334 | 0.022667 | 1.52075  | 2.341872 | 6.229815 | 3.887943 | 0.423585 | 0.422179 | 0.416004 |
| RP11-363D14.1__an   | 0.659793 | 0        | 0.280903 | 0        | 1.08893  | 1.36105  | 0        | 0        | 0        | -1.38097 | #DIV/0!  | #DIV/0!  | 0.478111 | 0.242629 | 0.188494 |
| RP11-363G15.2__lin  | 14.3862  | 10.8942  | 7.01813  | 5.56723  | 3.10144  | 73.2715  | 4.57992  | 10.5766  | 10.9809  | -1.3431  | 0.305352 | 1.648454 | 0.574076 | 0.663835 | 0.486531 |
| RP11-363J20.1__linc | 0.066402 | 0.019577 | 1.48066  | 3.62353  | 11.934   | 74.287   | 0.256872 | 0        | 0        | -5.84169 | 2.608551 | 8.450237 | 0.309952 | 0.493503 | 0.313236 |
| RP11-363J20.2__linc | 0        | 0        | 0.509031 | 0        | 3.56233  | 2.93245  | 0.917571 | 0        | 0        | -3.67346 | -0.85007 | 2.823389 | 0.197894 | 0.775213 | 0.315534 |
| RP11-363N22.2__an   | 0        | 0        | 0.878989 | 0        | 19.9524  | 0        | 0        | 0        | 0        | -4.50457 | #DIV/0!  | #DIV/0!  | 0.448619 | 0.42265  | 0.42265  |
| RP11-364B6.1__linc  | 0.078646 | 0.247366 | 0.235924 | 0        | 0.111568 | 0.224577 | 0.20509  | 0.123873 | 0.094878 | 0.741323 | 0.406884 | -0.33444 | 0.171459 | 0.64741  | 0.791617 |

|                     |          |          |          |          |          |          |          |          |          |          |          |          |          |          |          |
|---------------------|----------|----------|----------|----------|----------|----------|----------|----------|----------|----------|----------|----------|----------|----------|----------|
| RP11-364L4.3__linc  | 0.058146 | 0        | 0.115929 | 0.456875 | 6.23623  | 53.1556  | 0.338849 | 0        | 3.16486  | -8.42546 | -4.3311  | 4.094365 | 0.354888 | 0.372151 | 0.35427  |
| RP11-364P22.1__lin  | 0        | 0        | 1.36361  | 0        | 0.304994 | 0        | 0.112178 | 2.04795  | 0        | 2.160578 | -0.66369 | -2.82426 | 0.562591 | 0.813285 | 0.38676  |
| RP11-364P22.2__lin  | 0        | 0        | 2.16832  | 0        | 0.044196 | 4.15246  | 0.244377 | 20.0266  | 0        | -0.95266 | -3.22477 | -2.2721  | 0.409936 | 0.481186 | 0.545313 |
| RP11-365O16.3__se   | 0.666541 | 0        | 2.42368  | 0        | 4.6941   | 2.47939  | 0.533799 | 0.204905 | 0.42062  | -1.21497 | 1.414426 | 2.629391 | 0.502801 | 0.447538 | 0.301005 |
| RP11-365O16.6__an   | 0        | 0        | 0        | 0        | 2.43173  | 9.52656  | 0.572921 | 0        | 0        | #NUM!    | #NUM!    | 4.383531 | 0.297792 | 0.42265  | 0.332567 |
| RP11-366M4.13__lin  | 0        | 0        | 0.092398 | 0        | 37.5408  | 0.392994 | 0        | 0.050281 | 0.150095 | -8.6814  | -1.11677 | 7.564632 | 0.418045 | 0.185422 | 0.418921 |
| RP11-366M4.3__pro   | 0        | 0        | 0.208652 | 1.49986  | 7.89755  | 30.3928  | 0.581565 | 0.107223 | 0.220298 | -7.57517 | -2.12332 | 5.451853 | 0.268401 | 0.3163   | 0.279947 |
| RP11-366M4.8__pse   | 0.387579 | 1.29717  | 0.136188 | 0.232074 | 48.6409  | 16.0955  | 0.161856 | 10.627   | 0.36324  | -5.15699 | -2.61456 | 2.542425 | 0.270273 | 0.422907 | 0.244767 |
| RP11-367J11.2__an   | 2.05685  | 1.75373  | 2.11207  | 3.11055  | 0.883446 | 3.58965  | 0.894796 | 2.2881   | 1.65135  | -0.35665 | 0.292952 | 0.649601 | 0.523535 | 0.537771 | 0.513353 |
| RP11-367J11.3__linc | 0.370989 | 0.170492 | 0.279264 | 0.164261 | 8.56309  | 8.03212  | 2.59486  | 0.53799  | 0.060744 | -4.3519  | -1.96017 | 2.391724 | 0.194722 | 0.395052 | 0.323024 |
| RP11-367N14.2__an   | 4.99779  | 4.33662  | 6.48942  | 2.58238  | 1.98835  | 4.22209  | 3.28457  | 5.23866  | 1.90125  | 0.847701 | 0.602123 | -0.24558 | 0.000333 | 0.374029 | 0.767691 |
| RP11-368I23.2__linc | 0        | 0        | 0.850104 | 0        | 7.57256  | 24.3389  | 0        | 0        | 0        | -5.23029 | #DIV/0!  | #DIV/0!  | 0.273347 | 0.42265  | 0.277195 |
| RP11-368J21.3__psi  | 0.171958 | 0.085032 | 0.429245 | 0.376407 | 4.57227  | 3.42582  | 0.713643 | 0.04651  | 0.239838 | -3.60923 | -0.54321 | 3.066015 | 0.177948 | 0.685036 | 0.232156 |
| RP11-369C8.1__linc  | 0        | 0        | 0        | 0        | 3.28109  | 0        | 0.138448 | 0        | 0        | #NUM!    | #NUM!    | 4.566759 | 0.42265  | 0.42265  | 0.447503 |
| RP11-36D19.8__linc  | 0        | 0        | 0        | 0        | 28.1638  | 0        | 0        | 0        | 0        | #NUM!    | #DIV/0!  | #DIV/0!  | 0.42265  | #DIV/0!  | 0.42265  |
| RP11-370I10.2__linc | 0.030803 | 0        | 0.046249 | 0        | 16.4901  | 118.501  | 1.07309  | 0.050489 | 0        | -10.7747 | -3.86613 | 6.908619 | 0.348707 | 0.421548 | 0.353995 |
| RP11-370I10.6__ant  | 4.25499  | 2.77499  | 2.45838  | 1.72013  | 50.0661  | 128.225  | 0.686878 | 3.85334  | 3.23048  | -4.24578 | 0.288115 | 4.533899 | 0.267409 | 0.739483 | 0.25381  |
| RP11-370P15.2__lin  | 0        | 0        | 0        | 0        | 4.90703  | 2.1385   | 0        | 0        | 0        | #NUM!    | #DIV/0!  | #DIV/0!  | 0.240068 | #DIV/0!  | 0.240068 |
| RP11-371F15.3__an   | 0.100714 | 0        | 1.27259  | 0        | 8.3839   | 15.9446  | 0.990187 | 0        | 0.749982 | -4.14692 | -0.34158 | 3.805348 | 0.21573  | 0.794687 | 0.249735 |
| RP11-371I1.2__lincF | 0        | 0        | 0.181532 | 0        | 0.365488 | 2.21178  | 0.13818  | 0        | 0        | -3.82755 | 0.393675 | 4.221222 | 0.329493 | 0.890289 | 0.373023 |
| RP11-372E1.4__anti  | 0.57184  | 0.021272 | 0.259366 | 0.152324 | 0.560166 | 3.60898  | 0.135036 | 0.050188 | 0.124458 | -2.34179 | 1.460873 | 3.802661 | 0.414126 | 0.315872 | 0.342302 |
| RP11-372E1.6__anti  | 0.814838 | 0.157987 | 0.183247 | 0.094531 | 2.91765  | 273.55   | 0.209299 | 0.015555 | 0.719957 | -7.90223 | 0.291133 | 8.193362 | 0.418374 | 0.851543 | 0.416784 |
| RP11-372H2.1__linc  | 0        | 0.141368 | 0        | 0        | 3.84548  | 0        | 1.35915  | 0        | 3.13301  | -4.76564 | -4.98988 | -0.22425 | 0.42265  | 0.265097 | 0.927404 |
| RP11-372M18.1__lin  | 0        | 0        | 0        | 0        | 0        | 1.65924  | 0        | 0        | 0        | #NUM!    | #DIV/0!  | #DIV/0!  | 0.42265  | #DIV/0!  | 0.42265  |
| RP11-373E16.3__se   | 0        | 0        | 0.037884 | 0.062909 | 1.14888  | 0.154183 | 0.157771 | 0        | 0.061839 | -5.1722  | -2.53529 | 2.636915 | 0.336968 | 0.342524 | 0.427702 |
| RP11-375D13.2__lin  | 0        | 0        | 0        | 0        | 8.81394  | 15.2215  | 0        | 5.6559   | 0        | #NUM!    | #NUM!    | 2.087335 | 0.211057 | 0.42265  | 0.317402 |
| RP11-375D13.4__lin  | 0        | 0        | 0        | 0        | 1.31844  | 4.82554  | 0.794182 | 0.118694 | 0        | #NUM!    | #NUM!    | 2.750683 | 0.290896 | 0.343652 | 0.400219 |
| RP11-375H17.1__an   | 0        | 0        | 0.090312 | 0        | 2.33579  | 0        | 0.525945 | 0        | 0        | -4.69284 | -2.54192 | 2.150927 | 0.445387 | 0.528687 | 0.563577 |
| RP11-375I20.6__linc | 0.10895  | 0.183545 | 0.093477 | 0.124005 | 0.049885 | 0.104206 | 0.274596 | 0        | 0        | 0.472913 | 0.491184 | 0.01827  | 0.538421 | 0.756724 | 0.989355 |
| RP11-378I13.1__ant  | 0        | 0        | 0.050173 | 0        | 0.231973 | 1.35024  | 0.114618 | 0        | 0        | -4.9789  | -1.19186 | 3.787038 | 0.330211 | 0.70262  | 0.383684 |
| RP11-378J18.3__an   | 0        | 0        | 0        | 0        | 0        | 0        | 0        | 0        | 0        | #DIV/0!  | #DIV/0!  | #DIV/0!  | #DIV/0!  | #DIV/0!  | #DIV/0!  |
| RP11-379B18.6__lin  | 0.396441 | 1.12143  | 0.457798 | 2.87238  | 2.43975  | 20.938   | 0.504068 | 0.423569 | 0.675557 | -3.73191 | 0.301392 | 4.033304 | 0.322017 | 0.708972 | 0.30585  |
| RP11-379F4.4__anti  | 6.34387  | 1.20246  | 5.22249  | 1.84825  | 10.4903  | 12.2107  | 2.17031  | 6.57279  | 2.63591  | -0.94305 | 0.16625  | 1.109304 | 0.454241 | 0.889728 | 0.265345 |
| RP11-379J13.2__linc | 0        | 0        | 0        | 0        | 6.94635  | 4.32208  | 0        | 0        | 0        | #NUM!    | #DIV/0!  | #DIV/0!  | 0.204783 | #DIV/0!  | 0.204783 |
| RP11-379J5.5__anti: | 0        | 0        | 0.072109 | 0.023901 | 0.076908 | 7.26547  | 0.088236 | 0        | 0        | -6.67462 | -0.29118 | 6.383433 | 0.414595 | 0.918293 | 0.421706 |

|                     |          |          |          |          |          |          |          |          |          |          |          |          |          |          |          |
|---------------------|----------|----------|----------|----------|----------|----------|----------|----------|----------|----------|----------|----------|----------|----------|----------|
| RP11-379K17.4__an   | 0.056942 | 0.022379 | 0.223413 | 0.056911 | 3.19161  | 2.18353  | 0.115434 | 0.071491 | 0.056972 | -4.16537 | 0.311786 | 4.477157 | 0.205289 | 0.8145   | 0.206805 |
| RP11-379K22.2__an   | 0        | 0        | 0        | 0        | 1.94925  | 21.8751  | 0.15773  | 0        | 0        | #NUM!    | #NUM!    | 7.238836 | 0.373685 | 0.42265  | 0.377847 |
| RP11-379P15.1__lin  | 0        | 0        | 0.628595 | 0.010419 | 0.209663 | 0.067608 | 0.158616 | 0        | 0.0512   | 1.127616 | 1.583008 | 0.455392 | 0.671404 | 0.596212 | 0.825242 |
| RP11-37C7.1__proci  | 0.249901 | 1.4577   | 1.83156  | 1.25027  | 60.4742  | 373.023  | 0.319811 | 1.26872  | 1.39114  | -6.94063 | 0.248254 | 7.188881 | 0.337622 | 0.333048 | 0.337581 |
| RP11-37J13.1__psei  | 16.9169  | 3.08829  | 27.4673  | 37.5141  | 5.46847  | 3.02564  | 17.8971  | 4.46102  | 3.7247   | 0.0452   | 0.863992 | 0.818791 | 0.973624 | 0.481174 | 0.414716 |
| RP11-380D11.2__lin  | 0        | 0        | 0.542189 | 0        | 3.1693   | 13.7417  | 0.048073 | 0        | 0        | -4.96302 | 3.495512 | 8.458534 | 0.303811 | 0.475896 | 0.30964  |
| RP11-380D15.3__lin  | 0        | 0        | 0        | 0        | 0        | 0        | 0.348407 | 0        | 0        | #DIV/0!  | #NUM!    | #NUM!    | #DIV/0!  | 0.42265  | 0.42265  |
| RP11-380D23.2__lin  | 1.11208  | 0.094394 | 0        | 2.03057  | 110.574  | 0.929934 | 0.638321 | 0        | 0.633638 | -6.55619 | -0.07626 | 6.479935 | 0.413031 | 0.952549 | 0.413882 |
| RP11-380J14.1__linc | 0.018485 | 0.036326 | 0.1852   | 0.123111 | 51.1     | 10.7105  | 0.10893  | 0.033727 | 0.087371 | -8.01148 | 0.061292 | 8.07277  | 0.316826 | 0.956747 | 0.317007 |
| RP11-380P13.1__an   | 0        | 0.588059 | 1.29385  | 0.419737 | 72.569   | 17.7879  | 0.498504 | 1.64114  | 0.160377 | -5.59205 | -0.28945 | 5.302602 | 0.30501  | 0.851494 | 0.301066 |
| RP11-381K7.1__linc  | 0        | 0        | 0        | 0        | 1.32355  | 0        | 0        | 0        | 0        | #NUM!    | #DIV/0!  | #DIV/0!  | 0.42265  | #DIV/0!  | 0.42265  |
| RP11-382A20.4__an   | 11.2899  | 20.8869  | 1.53236  | 5.18563  | 12.8537  | 398.421  | 0.651878 | 7.56123  | 2.89927  | -3.62697 | 1.600973 | 5.22794  | 0.443395 | 0.237321 | 0.408398 |
| RP11-382A20.5__an   | 23.1271  | 20.4014  | 20.1253  | 7.62753  | 22.7722  | 989.714  | 9.95682  | 19.1603  | 14.8092  | -4.00234 | 0.535161 | 4.537501 | 0.430542 | 0.201109 | 0.421896 |
| RP11-382D12.1__lin  | 0        | 0        | 0        | 0        | 0        | 0.876068 | 0        | 0        | 0        | #NUM!    | #DIV/0!  | #DIV/0!  | 0.42265  | #DIV/0!  | 0.42265  |
| RP11-383C5.3__linc  | 0        | 1.16833  | 1.11036  | 14.0705  | 9.38723  | 4.68024  | 0.159974 | 0        | 0        | -3.62624 | 3.832295 | 7.458537 | 0.105006 | 0.244781 | 0.072835 |
| RP11-383C5.4__linc  | 0.227507 | 0.30031  | 0.29516  | 1.34926  | 2.43707  | 5.88266  | 0.361241 | 0.710019 | 0.589467 | -3.55444 | -1.01289 | 2.54155  | 0.160875 | 0.073213 | 0.182363 |
| RP11-383C6.2__linc  | 0        | 0        | 0        | 1.83678  | 0        | 2.04138  | 0        | 0        | 0        | #NUM!    | #DIV/0!  | #DIV/0!  | 0.184637 | #DIV/0!  | 0.184637 |
| RP11-384B12.3__ps   | 47.009   | 41.0676  | 32.4687  | 13.351   | 9.30154  | 10.0536  | 36.2442  | 29.4242  | 31.7101  | 1.881942 | 0.3079   | -1.57404 | 0.013799 | 0.157474 | 0.001379 |
| RP11-384F7.1__linc  | 0.138644 | 0.223365 | 0.564451 | 8.00684  | 248.447  | 131.998  | 1.67923  | 0        | 0.10111  | -8.71179 | -0.94235 | 7.769439 | 0.203733 | 0.696471 | 0.206547 |
| RP11-384F7.2__linc  | 0        | 0        | 0.689579 | 1.88565  | 26.9193  | 105.531  | 0        | 0        | 0        | -7.60591 | #DIV/0!  | #DIV/0!  | 0.287255 | 0.42265  | 0.287971 |
| RP11-384J4.1__lincf | 0        | 20.2149  | 0        | 0.347133 | 17.8938  | 35.4981  | 0.987422 | 5.50119  | 0        | -1.41055 | 1.639437 | 3.049989 | 0.455943 | 0.462604 | 0.274555 |
| RP11-384J4.2__lincf | 0        | 10.3278  | 0.249973 | 3.154    | 7.19383  | 44.6309  | 0.289531 | 9.94204  | 0.454982 | -2.37784 | -0.01476 | 2.363077 | 0.425266 | 0.880165 | 0.423453 |
| RP11-384K6.2__pse   | 0        | 0        | 0.206874 | 0.93997  | 0        | 2.51755  | 0.145381 | 0.374412 | 0.335052 | -4.06291 | -2.04691 | 2.016003 | 0.247655 | 0.112659 | 0.361286 |
| RP11-384K6.6__linc  | 2.20218  | 1.93813  | 3.18164  | 2.10074  | 9.34609  | 27.8542  | 1.48181  | 1.32755  | 1.52616  | -2.42427 | 0.756023 | 3.18029  | 0.283288 | 0.095315 | 0.266688 |
| RP11-384L8.1__sen   | 0.800066 | 1.36244  | 0.576581 | 0.212446 | 0.427304 | 7.02448  | 0.64297  | 0.54198  | 1.57041  | -1.48445 | -0.00855 | 1.4759   | 0.565329 | 0.992763 | 0.482088 |
| RP11-384P14.1__lin  | 0        | 0        | 0        | 0        | 0        | 0.444568 | 0        | 0        | 0        | #NUM!    | #DIV/0!  | #DIV/0!  | 0.42265  | #DIV/0!  | 0.42265  |
| RP11-385J1.2__anti  | 5.38006  | 10.7072  | 8.0182   | 16.0892  | 26.9193  | 67.1655  | 3.27374  | 5.41871  | 0.728986 | -2.19235 | 1.355341 | 3.547693 | 0.201828 | 0.083344 | 0.180656 |
| RP11-385N23.1__an   | 0        | 0        | 0        | 0        | 0.258242 | 0        | 0.142966 | 0        | 0        | #NUM!    | #NUM!    | 0.853052 | 0.42265  | 0.42265  | 0.774525 |
| RP11-386B13.3__lin  | 0        | 0        | 0.027168 | 0.072114 | 41.2948  | 3.69898  | 0.588547 | 0        | 0.029548 | -10.6959 | -4.50787 | 6.188063 | 0.372781 | 0.420319 | 0.381054 |
| RP11-386B13.4__lin  | 0        | 0.085875 | 0        | 0        | 1.43305  | 8.37941  | 0.142061 | 0        | 0        | -6.83623 | -0.7262  | 6.110032 | 0.338325 | 0.804583 | 0.343326 |
| RP11-386G11.5__an   | 21.6867  | 0        | 0        | 0        | 6.2628   | 579.152  | 6.23472  | 0        | 0        | -4.75458 | 1.798414 | 6.552991 | 0.438452 | 0.42265  | 0.422689 |
| RP11-386I8.6__lincF | 0        | 0        | 0.01386  | 0        | 0.044222 | 0        | 0.067759 | 0.045335 | 0        | -1.67386 | -3.02856 | -1.3547  | 0.621742 | 0.307186 | 0.413242 |
| RP11-386M24.3__lin  | 0.077433 | 0.149254 | 0.132559 | 0.091647 | 3.47933  | 10.391   | 0.149076 | 0.118458 | 0.093837 | -5.28039 | -0.00851 | 5.271878 | 0.271837 | 0.98591  | 0.275076 |
| RP11-386M24.4__ps   | 3.05381  | 44.065   | 19.3191  | 30.1071  | 7.61475  | 94.2175  | 16.4439  | 42.4096  | 21.1915  | -0.9898  | -0.2688  | 0.720992 | 0.568198 | 0.423253 | 0.634787 |
| RP11-387D10.2__an   | 50.9337  | 28.7534  | 25.0514  | 4.02179  | 19.4659  | 5.46626  | 14.3384  | 3.26676  | 35.6102  | 1.85496  | 0.976877 | -0.87808 | 0.153321 | 0.350912 | 0.608101 |

|                     |          |          |          |          |          |          |          |          |          |          |          |          |          |          |          |
|---------------------|----------|----------|----------|----------|----------|----------|----------|----------|----------|----------|----------|----------|----------|----------|----------|
| RP11-387H17.4__lin  | 10.467   | 4.97609  | 4.17561  | 2.93801  | 3.44466  | 3.58183  | 10.6485  | 8.82732  | 8.48815  | 0.97736  | -0.51134 | -1.4887  | 0.276693 | 0.16709  | 0.020218 |
| RP11-387H17.6__lin  | 0.041955 | 0.074221 | 0.086515 | 0.361475 | 2.53372  | 2.21958  | 2.18429  | 0.266637 | 0.421123 | -4.65732 | -3.82473 | 0.83259  | 0.13306  | 0.292018 | 0.621398 |
| RP11-388M20.1__ar   | 0.121547 | 0.143399 | 0.404574 | 11.9191  | 1.88419  | 9.93209  | 0.786242 | 0.044057 | 0.131541 | -5.14777 | -0.52267 | 4.625099 | 0.127543 | 0.767348 | 0.120268 |
| RP11-389C8.2__sen   | 0.726367 | 0.126373 | 0.310009 | 0.37994  | 2.03758  | 0.079856 | 0.151846 | 0.6621   | 0.415073 | -1.10287 | -0.07997 | 1.022906 | 0.606047 | 0.951723 | 0.489338 |
| RP11-389C8.3__linc  | 0.35503  | 0.62833  | 0.354387 | 0.116753 | 0.421995 | 0        | 0.778136 | 0.337549 | 1.00769  | 1.312123 | -0.66655 | -1.97868 | 0.02736  | 0.4541   | 0.242835 |
| RP11-389G6.3__sen   | 0        | 0        | 0.041171 | 0        | 0        | 0        | 0.060436 | 0        | 0        | #DIV/0!  | -0.55378 | #NUM!    | 0.42265  | 0.847899 | 0.42265  |
| RP11-38G5.2__lincR  | 0.934526 | 0.369978 | 0.608286 | 1.8995   | 1.95844  | 3.12117  | 0.865431 | 0.969974 | 0        | -1.86736 | 0.05958  | 1.926945 | 0.064147 | 0.947878 | 0.135044 |
| RP11-38J22.1__lincf | 0        | 0        | 0        | 0        | 0        | 0        | 0        | 0        | 0        | #DIV/0!  | #DIV/0!  | #DIV/0!  | #DIV/0!  | #DIV/0!  | #DIV/0!  |
| RP11-38J22.3__anti  | 0.017141 | 0.203321 | 1.5738   | 0.204738 | 3.36615  | 5.66848  | 0.446293 | 0        | 0.055947 | -2.3644  | 1.836942 | 4.201346 | 0.169764 | 0.530969 | 0.229752 |
| RP11-38L15.3__anti  | 0.281128 | 0.179032 | 0.806483 | 0.53643  | 1.90892  | 2.52348  | 0.660054 | 0.256307 | 0.215828 | -1.9719  | 0.161895 | 2.133791 | 0.127805 | 0.890046 | 0.220334 |
| RP11-38P22.2__linc  | 0.908293 | 0.259138 | 1.5692   | 4.22188  | 0.140911 | 8.23589  | 1.01054  | 1.64912  | 1.3237   | -2.2028  | -0.54158 | 1.661215 | 0.235283 | 0.491378 | 0.3598   |
| RP11-390B4.5__anti  | 0.058614 | 0.248819 | 0.082169 | 0.327304 | 0.275939 | 0.022464 | 0.264489 | 0.102553 | 0.068107 | -0.68349 | -0.15951 | 0.523976 | 0.507134 | 0.896033 | 0.42089  |
| RP11-392O1.4__ant   | 7.44931  | 11.1215  | 5.44254  | 19.0077  | 56.1082  | 138.109  | 1.28052  | 0        | 0        | -3.15047 | 4.229035 | 7.379502 | 0.222827 | 0.051223 | 0.184886 |
| RP11-392P7.6__anti  | 12.2426  | 17.1919  | 2.86719  | 15.8408  | 25.6035  | 9.29052  | 23.1456  | 9.17616  | 19.0545  | -0.65137 | -0.66949 | -0.01813 | 0.04797  | 0.478039 | 0.981898 |
| RP11-394A14.2__lin  | 0        | 0.112286 | 0.206655 | 0.229303 | 3.15011  | 3.31323  | 0.254333 | 0.069458 | 0.108741 | -4.39121 | -0.43952 | 3.951696 | 0.154262 | 0.762276 | 0.186926 |
| RP11-395F4.1__linc  | 0        | 0        | 0        | 0        | 4.72369  | 4.03969  | 0        | 0        | 0        | #NUM!    | #DIV/0!  | #DIV/0!  | 0.185979 | #DIV/0!  | 0.185979 |
| RP11-395I6.2__lincF | 0        | 0        | 0        | 0        | 1.79641  | 0        | 0        | 0        | 0        | #NUM!    | #DIV/0!  | #DIV/0!  | 0.42265  | #DIV/0!  | 0.42265  |
| RP11-395L14.5__ps   | 0        | 0        | 4.15817  | 0.276002 | 1.79536  | 177.814  | 0.961458 | 0.29753  | 0.359103 | -5.43499 | 1.361656 | 6.796641 | 0.415795 | 0.626852 | 0.420032 |
| RP11-396B14.2__lin  | 0        | 0.145748 | 1.23707  | 0.646126 | 15.1409  | 8.31578  | 0.724641 | 0        | 0.133004 | -4.12352 | 0.689159 | 4.812677 | 0.209538 | 0.771792 | 0.220221 |
| RP11-396C23.2__lin  | 0.311784 | 0        | 0.853094 | 1.73353  | 25.6035  | 14.222   | 3.21045  | 0.113887 | 0        | -5.15691 | -1.51289 | 3.644023 | 0.193545 | 0.587675 | 0.244689 |
| RP11-396C23.4__an   | 1.00551  | 1.72509  | 0.512521 | 1.60467  | 0.934883 | 148.178  | 1.11238  | 2.40955  | 0.858072 | -5.53832 | -0.43355 | 5.104772 | 0.42341  | 0.152133 | 0.426532 |
| RP11-396N11.1__lin  | 0        | 0        | 0        | 0        | 122.616  | 3.19967  | 0.208598 | 0        | 0        | #NUM!    | #NUM!    | 9.236371 | 0.407785 | 0.42265  | 0.408768 |
| RP11-396O20.1__lin  | 0        | 0        | 1.93472  | 0        | 19.2967  | 79.6174  | 0        | 0        | 0        | -5.67598 | #DIV/0!  | #DIV/0!  | 0.300492 | 0.42265  | 0.302901 |
| RP11-396O20.2__lin  | 0        | 0        | 0        | 0.232716 | 2.95201  | 6.66859  | 0.460318 | 2.3223   | 0.127714 | #NUM!    | #NUM!    | 1.759426 | 0.220334 | 0.291297 | 0.390343 |
| RP11-397A16.1__lin  | 0.106665 | 0.055042 | 0.042297 | 0.227205 | 11.7375  | 25.6659  | 0.058379 | 0.250099 | 4.06555  | -7.52717 | -4.42229 | 3.104872 | 0.232699 | 0.402333 | 0.215195 |
| RP11-397C18.2__an   | 0        | 0        | 0        | 0        | 3.20262  | 2.28946  | 0        | 0        | 0.032988 | #NUM!    | #NUM!    | 7.379259 | 0.194561 | 0.42265  | 0.195497 |
| RP11-397H6.1__linc  | 0        | 0        | 0        | 0        | 0        | 4.53351  | 0        | 0        | 0        | #NUM!    | #DIV/0!  | #DIV/0!  | 0.42265  | #DIV/0!  | 0.42265  |
| RP11-398E10.1__lin  | 0        | 0        | 1.2306   | 0        | 12.3395  | 8.95763  | 0        | 0.429955 | 0        | -4.11323 | 1.517104 | 5.63033  | 0.204254 | 0.645389 | 0.191552 |
| RP11-398M15.1__lin  | 0        | 0        | 0        | 0        | 4.89989  | 36.5986  | 0        | 0        | 0        | #NUM!    | #DIV/0!  | #DIV/0!  | 0.351142 | #DIV/0!  | 0.351142 |
| RP11-39H13.1__linc  | 0        | 0        | 1.28419  | 0        | 0        | 4.92032  | 0.367848 | 0        | 0        | -1.93789 | 1.803677 | 3.74157  | 0.42265  | 0.603955 | 0.4673   |
| RP11-3L23.2__lincR  | 0        | 0        | 61.3604  | 0        | 0.867585 | 9.15335  | 0        | 0        | 0        | 2.614291 | #DIV/0!  | #DIV/0!  | 0.432323 | 0.42265  | 0.370747 |
| RP11-3P17.4__lincR  | 0        | 620.531  | 318.691  | 290.15   | 115.937  | 72.3438  | 453.311  | 0        | 730.872  | 0.973156 | -0.33435 | -1.30751 | 0.579088 | 0.837818 | 0.407989 |
| RP11-400D2.2__linc  | 0        | 0        | 0        | 0        | 0.538923 | 9.52862  | 0.090595 | 0        | 0        | #NUM!    | #NUM!    | 6.796066 | 0.390969 | 0.42265  | 0.396477 |
| RP11-400D2.3__linc  | 0        | 0        | 0        | 0        | 2.33256  | 97.6953  | 0        | 0        | 0        | #NUM!    | #DIV/0!  | #DIV/0!  | 0.409033 | #DIV/0!  | 0.409033 |
| RP11-400F19.8__prc  | 3.68605  | 2.50412  | 4.35222  | 3.55456  | 4.10928  | 23.1152  | 2.85565  | 3.01819  | 7.04249  | -1.54575 | -0.29299 | 1.252752 | 0.379585 | 0.521116 | 0.360426 |

|                     |          |          |          |          |          |          |          |          |          |          |          |          |          |          |          |
|---------------------|----------|----------|----------|----------|----------|----------|----------|----------|----------|----------|----------|----------|----------|----------|----------|
| RP11-400N13.1__lin  | 0        | 0        | 1.6148   | 0.36965  | 248.447  | 572.914  | 0.972814 | 0        | 0        | -8.99117 | 0.73112  | 9.722286 | 0.239958 | 0.803388 | 0.241167 |
| RP11-400N13.2__lin  | 42.5523  | 0        | 0.900707 | 21.9134  | 17.1326  | 9.40152  | 0.667881 | 0        | 2.04687  | -0.15697 | 4.000564 | 4.157531 | 0.89752  | 0.438659 | 0.065893 |
| RP11-400N13.3__lin  | 1.93153  | 1.68905  | 1.23256  | 2.89634  | 211.733  | 6.47636  | 0.762428 | 1.58676  | 6.39678  | -5.50967 | -0.8497  | 4.659974 | 0.405775 | 0.575609 | 0.416599 |
| RP11-400N9.1__anti  | 0.039236 | 0.030845 | 0.261891 | 0.208573 | 0.393362 | 0.363177 | 0.012826 | 0.064342 | 0.142429 | -1.53963 | 0.596208 | 2.13584  | 0.114344 | 0.488523 | 0.026034 |
| RP11-401I19.1__linc | 0        | 0        | 0        | 0        | 0        | 0        | 0        | 0        | 0        | #DIV/0!  | #DIV/0!  | #DIV/0!  | #DIV/0!  | #DIV/0!  | #DIV/0!  |
| RP11-401P9.5__anti  | 0        | 0.060993 | 0        | 0.12108  | 13.8751  | 1.50687  | 0.335439 | 0        | 0        | -7.98968 | -2.45933 | 5.530358 | 0.358441 | 0.535251 | 0.372631 |
| RP11-402J6.1__anti  | 0.01303  | 5.10091  | 0.143503 | 0.339071 | 3.03705  | 3.01373  | 0.089448 | 0        | 0.04257  | -0.28142 | 5.315563 | 5.596984 | 0.815843 | 0.420053 | 0.151095 |
| RP11-402L6.1__anti  | 0        | 0        | 0.050972 | 0.202988 | 0.06806  | 0.17064  | 0.287087 | 0.111317 | 0        | -3.11526 | -2.96646 | 0.148796 | 0.080274 | 0.357296 | 0.871908 |
| RP11-403I13.4__linc | 2.97023  | 4.72083  | 5.20619  | 4.1117   | 3.9888   | 86.9931  | 1.68703  | 1.50876  | 5.854    | -2.88228 | 0.511107 | 3.393392 | 0.419839 | 0.368768 | 0.388309 |
| RP11-404I7.2__lincF | 0        | 0        | 0        | 0        | 3.93527  | 7.7354   | 0        | 0        | 0        | #NUM!    | #DIV/0!  | #DIV/0!  | 0.223624 | #DIV/0!  | 0.223624 |
| RP11-404J23.1__linc | 0        | 0        | 0        | 0        | 17.1882  | 6.0193   | 0        | 0        | 0        | #NUM!    | #DIV/0!  | #DIV/0!  | 0.264272 | #DIV/0!  | 0.264272 |
| RP11-404K5.2__pse   | 0.057991 | 0        | 0.549088 | 14.9438  | 183.923  | 2.81508  | 0.310734 | 0.080215 | 0.182251 | -8.37598 | 0.082846 | 8.458827 | 0.370913 | 0.956786 | 0.370482 |
| RP11-404O13.5__lin  | 0.882132 | 0.083185 | 0.421006 | 0        | 5.05569  | 1.26677  | 0.341332 | 0.616452 | 0.07575  | -2.18922 | 0.423677 | 2.6129   | 0.443435 | 0.755861 | 0.337462 |
| RP11-404P21.3__an   | 0.073153 | 0        | 0.505493 | 1.66754  | 10.6731  | 4.59645  | 1.15705  | 0.265989 | 0.105945 | -4.87136 | -1.40182 | 3.469541 | 0.181647 | 0.537145 | 0.215951 |
| RP11-405A12.2__lin  | 14.1841  | 110.521  | 9.36285  | 29.8589  | 170.785  | 173.315  | 7.20071  | 65.5674  | 121.263  | -1.47992 | -0.53332 | 0.946592 | 0.210275 | 0.713399 | 0.131104 |
| RP11-405F3.4__anti  | 0.210036 | 0.156422 | 0.445135 | 0.132307 | 2.31944  | 8.02583  | 0.486589 | 0.944866 | 0.394761 | -3.6904  | -1.17003 | 2.520376 | 0.292121 | 0.300175 | 0.356495 |
| RP11-406A9.2__linc  | 23.7649  | 6.27962  | 10.9278  | 19.3176  | 9.60711  | 899.74   | 13.9713  | 10.6408  | 27.4552  | -4.50244 | -0.34573 | 4.156708 | 0.423388 | 0.674838 | 0.419807 |
| RP11-406H4.1__anti  | 0        | 0        | 0        | 0.041301 | 4.87809  | 51.6202  | 0        | 0        | 0        | #NUM!    | #DIV/0!  | #DIV/0!  | 0.370433 | #DIV/0!  | 0.370433 |
| RP11-407A16.3__lin  | 0        | 0        | 0.755278 | 0        | 2.08125  | 4.13192  | 0.656268 | 0        | 0        | -3.04025 | 0.202723 | 3.242973 | 0.205573 | 0.942869 | 0.313414 |
| RP11-407A16.4__lin  | 0        | 0        | 0.420802 | 0        | 13.1251  | 10.1155  | 0        | 0        | 0        | -5.78736 | #DIV/0!  | #DIV/0!  | 0.192575 | 0.42265  | 0.190265 |
| RP11-407B7.1__pro   | 0.405999 | 0.039168 | 1.14732  | 18.146   | 7.68226  | 36.7853  | 0.876561 | 0.462811 | 2.89897  | -5.29712 | -1.41222 | 3.884903 | 0.130889 | 0.179852 | 0.129398 |
| RP11-407N17.6__ps   | 1.72963  | 3.64253  | 4.10618  | 4.25103  | 3.16845  | 1.83346  | 2.59772  | 3.19531  | 2.26845  | 0.034723 | 0.23359  | 0.198867 | 0.962032 | 0.606921 | 0.597675 |
| RP11-408H1.3__linc  | 0.138442 | 0.022091 | 0.694953 | 0.112176 | 2.78921  | 11.4067  | 1.88706  | 0.061489 | 0.091889 | -4.06394 | -1.25406 | 2.80988  | 0.297969 | 0.630221 | 0.398418 |
| RP11-40H20.4__anti  | 0        | 0        | 0        | 0        | 0        | 0        | 0        | 0        | 0.460484 | #DIV/0!  | #NUM!    | #NUM!    | #DIV/0!  | 0.42265  | 0.42265  |
| RP11-410C4.4__linc  | 0        | 0        | 0.337289 | 0        | 0        | 1.96098  | 0        | 0        | 0.482852 | -2.53952 | -0.5176  | 2.021922 | 0.42265  | 0.42265  | 0.42265  |
| RP11-410C4.5__linc  | 0        | 0        | 0.091127 | 0.107592 | 24.4269  | 4.46334  | 0.09921  | 0.011059 | 0.033052 | -8.31386 | -0.65331 | 7.660548 | 0.327461 | 0.739068 | 0.328653 |
| RP11-410D17.2__lin  | 20.9456  | 11.4237  | 14.4634  | 11.5287  | 47.9133  | 259.637  | 7.61145  | 16.0883  | 14.5078  | -2.76833 | 0.293658 | 3.061984 | 0.366339 | 0.647492 | 0.344055 |
| RP11-410N8.3__anti  | 0.067713 | 0.133103 | 0.812796 | 0.478442 | 1.69368  | 2.40504  | 1.39856  | 0.639337 | 0.123997 | -2.17495 | -1.09279 | 1.082158 | 0.092454 | 0.580864 | 0.478919 |
| RP11-412D9.4__anti  | 0.211682 | 0.099862 | 0.042355 | 0.224456 | 0.157962 | 0.141365 | 0.124338 | 0        | 0.092039 | -0.56564 | 0.709786 | 1.275421 | 0.150849 | 0.439551 | 0.082374 |
| RP11-412H8.2__linc  | 0        | 0.126438 | 0        | 2.72652  | 0        | 0        | 0        | 0        | 0        | -4.43056 | #DIV/0!  | #DIV/0!  | 0.450014 | 0.42265  | 0.42265  |
| RP11-412H9.2__linc  | 0        | 0        | 0        | 0        | 0        | 0        | 0        | 0        | 0        | #DIV/0!  | #DIV/0!  | #DIV/0!  | #DIV/0!  | #DIV/0!  | #DIV/0!  |
| RP11-412P11.1__lin  | 0        | 0.056532 | 0.191756 | 0        | 1.40372  | 26.3811  | 0.09379  | 0        | 0.074428 | -6.80614 | 0.561684 | 7.367822 | 0.393752 | 0.711961 | 0.394766 |
| RP11-413E1.4__sen   | 1.97258  | 13.9262  | 2.30379  | 2.73985  | 100.521  | 75.3518  | 0.96291  | 22.9064  | 1.91302  | -3.29462 | -0.50224 | 2.79238  | 0.182536 | 0.516189 | 0.174328 |
| RP11-413G15.1__lin  | 0.761149 | 0        | 0.11803  | 0        | 0.19972  | 4.46877  | 0.184228 | 0        | 0.127804 | -2.40873 | 1.494463 | 3.90319  | 0.505181 | 0.432512 | 0.421721 |
| RP11-413P11.1__lin  | 0        | 0        | 0.950561 | 0.516966 | 19.4659  | 13.5083  | 0        | 0        | 0        | -5.13886 | #DIV/0!  | #DIV/0!  | 0.18918  | 0.42265  | 0.18411  |

|                     |          |          |          |          |          |          |          |          |          |          |          |          |          |          |          |
|---------------------|----------|----------|----------|----------|----------|----------|----------|----------|----------|----------|----------|----------|----------|----------|----------|
| RP11-414J4.2__proc  | 0.044844 | 0.070509 | 0.63189  | 0.116371 | 41.4548  | 66.378   | 0.087918 | 0.016336 | 0.081357 | -7.17456 | 2.009296 | 9.183855 | 0.203299 | 0.41561  | 0.204197 |
| RP11-415A20.1__lin  | 0        | 0        | 0        | 0        | 6.49381  | 2.53386  | 0        | 0        | 0        | #NUM!    | #DIV/0!  | #DIV/0!  | 0.252276 | #DIV/0!  | 0.252276 |
| RP11-415C15.1__lin  | 0        | 0        | 0.574719 | 0        | 0        | 0.076627 | 0        | 0.089041 | 0        | 2.906924 | 2.690309 | -0.21662 | 0.42265  | 0.517851 | 0.938989 |
| RP11-415C15.2__lin  | 0.05527  | 0        | 0.04261  | 5.88704  | 3.85244  | 39.0984  | 0.161141 | 0.091927 | 0        | -8.96278 | -1.37045 | 7.592332 | 0.290758 | 0.388588 | 0.293332 |
| RP11-415I12.3__ant  | 6.47283  | 3.53142  | 3.35669  | 3.73981  | 9.04391  | 107.032  | 1.67698  | 5.86458  | 6.25778  | -3.16472 | -0.04658 | 3.118146 | 0.408213 | 0.95831  | 0.393046 |
| RP11-416I2.1__lincF | 0.080981 | 0.061786 | 0.193225 | 0.069718 | 0.202345 | 1.33351  | 0.138694 | 0.097278 | 0.08653  | -2.25659 | 0.059118 | 2.315706 | 0.362044 | 0.938378 | 0.408935 |
| RP11-416O18.1__lin  | 0.013631 | 0.016072 | 0.616875 | 0.043147 | 11.9852  | 36.5986  | 0.151152 | 0.039805 | 0.088203 | -6.23279 | 1.21173  | 7.444519 | 0.269481 | 0.612041 | 0.273367 |
| RP11-416O18.2__lin  | 0        | 0        | 0        | 0        | 3.66705  | 0        | 0        | 0        | 0        | #NUM!    | #DIV/0!  | #DIV/0!  | 0.42265  | #DIV/0!  | 0.42265  |
| RP11-417F21.1__an   | 22.5206  | 0        | 0        | 4.26268  | 1.06627  | 18.6112  | 0        | 0        | 0        | -0.08819 | #DIV/0!  | #DIV/0!  | 0.968591 | 0.42265  | 0.277208 |
| RP11-417F21.2__an   | 0.139564 | 0.117249 | 0        | 0        | 0        | 12.2107  | 0.274914 | 0.132575 | 0.47577  | -5.57128 | -1.78212 | 3.789166 | 0.434855 | 0.269167 | 0.442886 |
| RP11-417J8.1__lincI | 0        | 0.020056 | 0.613772 | 0        | 1.09512  | 0        | 0.783057 | 0        | 0        | -0.78892 | -0.30503 | 0.4839   | 0.784862 | 0.913422 | 0.866172 |
| RP11-417J8.6__lincI | 0.590528 | 0.160799 | 2.61008  | 0        | 29.2622  | 60.0218  | 2.10951  | 2.53342  | 2.75091  | -4.73126 | -1.13726 | 3.594006 | 0.229325 | 0.174634 | 0.252339 |
| RP11-417L19.2__lin  | 0        | 0        | 1.51636  | 1.74799  | 0.919268 | 2.89979  | 0.798569 | 0        | 0        | -1.8763  | 0.925123 | 2.801424 | 0.030125 | 0.758186 | 0.136079 |
| RP11-417L19.4__lin  | 0        | 0        | 0        | 0        | 1.42817  | 11.4301  | 0        | 0        | 0        | #NUM!    | #DIV/0!  | #DIV/0!  | 0.355522 | #DIV/0!  | 0.355522 |
| RP11-418B12.1__lin  | 0.046138 | 0        | 0.276282 | 0.060657 | 0        | 0        | 0        | 0        | 0        | 2.410206 | #DIV/0!  | #DIV/0!  | 0.453742 | 0.335437 | 0.42265  |
| RP11-418I22.2__linc | 0.265085 | 0.632204 | 0.298893 | 0.238606 | 2.97534  | 6.38932  | 0.668793 | 0.056176 | 0.442966 | -3.00509 | 0.034478 | 3.039566 | 0.256193 | 0.977286 | 0.266346 |
| RP11-418J17.1__an   | 8.30793  | 15.9313  | 5.76731  | 12.104   | 13.7213  | 73.0158  | 6.45815  | 7.97293  | 14.8399  | -1.71983 | 0.035806 | 1.75564  | 0.410289 | 0.965217 | 0.316099 |
| RP11-418J17.3__linc | 0.762882 | 1.35651  | 1.59067  | 6.79034  | 5.84425  | 12.7092  | 1.87814  | 0.135566 | 0.975067 | -2.77212 | 0.31189  | 3.084007 | 0.06927  | 0.763992 | 0.074329 |
| RP11-419C19.2__lin  | 0        | 0        | 0.491953 | 0        | 2.74046  | 4.35874  | 0        | 0.463492 | 0        | -3.85106 | 0.085976 | 3.93704  | 0.195114 | 0.975689 | 0.220942 |
| RP11-419L4.1__lincI | 0        | 0        | 0        | 0        | 0.067884 | 0        | 0        | 0        | 0        | #NUM!    | #DIV/0!  | #DIV/0!  | 0.42265  | #DIV/0!  | 0.42265  |
| RP11-420A23.1__lin  | 1.09992  | 2.50993  | 0.740661 | 9.21787  | 8.3839   | 497.364  | 2.30628  | 1.60597  | 3.68387  | -6.88715 | -0.80408 | 6.08307  | 0.406504 | 0.433333 | 0.406754 |
| RP11-420N3.2__pro   | 4.18224  | 11.0484  | 3.75132  | 3.57045  | 273.257  | 1161.52  | 2.19624  | 2.84787  | 4.53001  | -6.24364 | 0.987417 | 7.231057 | 0.309681 | 0.358983 | 0.305737 |
| RP11-421E14.2__se   | 0.991347 | 2.33805  | 0.716791 | 3.4333   | 2.18339  | 3.84025  | 1.49856  | 1.39969  | 1.52917  | -1.22481 | -0.1299  | 1.094907 | 0.212678 | 0.835841 | 0.067575 |
| RP11-421L10.1__lin  | 0.044958 | 0.007573 | 0.135123 | 0.068432 | 0.096403 | 4.75973  | 0.044152 | 0.028122 | 0.049034 | -4.71386 | 0.629401 | 5.343257 | 0.408746 | 0.567234 | 0.411375 |
| RP11-421L21.3__an   | 6.25107  | 2.87188  | 4.0407   | 9.50647  | 7.45875  | 9.84922  | 5.48519  | 6.85798  | 9.0532   | -1.02645 | -0.70081 | 0.325644 | 0.025261 | 0.26306  | 0.24498  |
| RP11-421N8.1__pse   | 45.9976  | 17.7949  | 23.9887  | 28.3921  | 6.79494  | 7.1459   | 32.2559  | 25.5318  | 48.7794  | 1.052131 | -0.27978 | -1.33191 | 0.018444 | 0.630855 | 0.1906   |
| RP11-422J15.1__linc | 0        | 0        | 0.76041  | 0        | 4.79589  | 605.201  | 0        | 0        | 0        | -9.64781 | #DIV/0!  | #DIV/0!  | 0.418087 | 0.42265  | 0.418093 |
| RP11-422J8.1__anti  | 3.1911   | 2.25411  | 3.50166  | 4.45983  | 2.18905  | 3.77193  | 3.08911  | 2.80592  | 13.2336  | -0.22001 | -1.09628 | -0.87627 | 0.34481  | 0.396966 | 0.47523  |
| RP11-422P22.1__lin  | 0        | 0        | 0.702547 | 2.64941  | 1.71419  | 12.3051  | 0        | 0        | 1.09696  | -4.5684  | -0.64284 | 3.925559 | 0.233363 | 0.42265  | 0.227891 |
| RP11-423G4.7__linc  | 0        | 0        | 2.07016  | 0.157328 | 0        | 3.55356  | 0        | 0        | 0        | -0.84202 | #DIV/0!  | #DIV/0!  | 0.364978 | 0.42265  | 0.397679 |
| RP11-423J7.1__lincI | 0        | 0        | 0        | 0        | 0        | 0        | 0.373924 | 0        | 0        | #DIV/0!  | #NUM!    | #NUM!    | #DIV/0!  | 0.42265  | 0.42265  |
| RP11-424I19.2__linc | 0.187106 | 0.044147 | 0.328071 | 0        | 0.454445 | 944.727  | 0.847258 | 0        | 0.121579 | -10.7227 | -0.79257 | 9.930122 | 0.422513 | 0.658877 | 0.42289  |
| RP11-425A23.1__an   | 0        | 0        | 0        | 0        | 0.620785 | 0        | 0.191473 | 0        | 0        | #NUM!    | #NUM!    | 1.696953 | 0.42265  | 0.42265  | 0.618462 |
| RP11-425I13.3__ant  | 0.546773 | 0.107315 | 0        | 3.42122  | 29.883   | 15.6548  | 0.311107 | 0.165744 | 3.24992  | -6.22595 | -2.51037 | 3.715577 | 0.173977 | 0.455653 | 0.192797 |
| RP11-426C22.5__lin  | 2.66765  | 4.35804  | 0.996312 | 7.45908  | 8.58605  | 73.0158  | 0.499588 | 15.6434  | 4.15233  | -3.47276 | -1.33911 | 2.133646 | 0.352887 | 0.405398 | 0.429351 |

|                     |          |          |          |          |          |          |          |          |          |          |          |          |          |          |          |
|---------------------|----------|----------|----------|----------|----------|----------|----------|----------|----------|----------|----------|----------|----------|----------|----------|
| RP11-426L16.8__lin  | 0.959932 | 0.527923 | 2.1867   | 42.6697  | 1333.84  | 12.245   | 4.09794  | 0.195037 | 3.69596  | -8.56201 | -1.12043 | 7.441573 | 0.400543 | 0.287898 | 0.402513 |
| RP11-426L16.9__an   | 0        | 0.033244 | 0.112888 | 0        | 0.999912 | 0.323772 | 0.05528  | 0        | 0.107425 | -3.17922 | -0.15499 | 3.024233 | 0.312859 | 0.852194 | 0.345764 |
| RP11-427M20.1__lin  | 0.235033 | 0.208032 | 1.37201  | 0        | 29.883   | 56.926   | 0        | 0.063668 | 0        | -5.57974 | 4.833324 | 10.41307 | 0.220885 | 0.277454 | 0.220667 |
| RP11-428C19.4__an   | 1.43023  | 0.780861 | 2.04177  | 5.63422  | 2.68036  | 20.5245  | 2.70471  | 1.93297  | 2.45415  | -2.76152 | -0.73772 | 2.023795 | 0.254853 | 0.072308 | 0.314698 |
| RP11-428C19.5__lin  | 0        | 0        | 0.19678  | 0        | 0        | 0        | 0        | 0        | 0.209134 | #DIV/0!  | -0.08784 | #NUM!    | 0.42265  | 0.42265  | 0.42265  |
| RP11-428C6.2__linc  | 0        | 0        | 0.120285 | 0        | 0.575294 | 0.2001   | 0.264558 | 0        | 0.097906 | -2.68847 | -1.59138 | 1.097093 | 0.348787 | 0.473369 | 0.628306 |
| RP11-428G2.1__linc  | 0        | 0        | 0        | 0        | 0        | 0        | 0        | 0        | 0        | #DIV/0!  | #DIV/0!  | #DIV/0!  | #DIV/0!  | #DIV/0!  | #DIV/0!  |
| RP11-428L9.1__lincl | 0        | 0        | 0.836867 | 0        | 0.824226 | 0        | 0        | 0        | 0        | 0.021958 | #DIV/0!  | #DIV/0!  | 0.993787 | 0.42265  | 0.42265  |
| RP11-428L9.2__lincl | 0        | 0        | 0        | 0.20612  | 0.5516   | 5.76915  | 0.203699 | 0        | 0        | #NUM!    | #NUM!    | 5.001881 | 0.350197 | 0.42265  | 0.370079 |
| RP11-429A20.3__lin  | 0        | 0        | 0.241873 | 0        | 1.0085   | 0.227462 | 0.647867 | 0        | 0.32681  | -2.35331 | -2.01067 | 0.342638 | 0.430958 | 0.352499 | 0.87458  |
| RP11-429A20.4__lin  | 0        | 0        | 0.144313 | 0.126673 | 0        | 0        | 0        | 0        | 0        | 0.188092 | #DIV/0!  | #DIV/0!  | 0.946962 | 0.42265  | 0.42265  |
| RP11-429B14.1__se   | 1.20244  | 1.004    | 2.78288  | 1.64825  | 33.3774  | 126.118  | 1.59502  | 1.20533  | 1.13467  | -5.01336 | 0.342472 | 5.355833 | 0.292973 | 0.64325  | 0.296714 |
| RP11-429D19.1__se   | 0.797086 | 0.470673 | 0.395709 | 0        | 0.618485 | 0.550748 | 0.479613 | 0.107113 | 0.638396 | 0.508632 | 0.441269 | -0.06736 | 0.654279 | 0.531545 | 0.954331 |
| RP11-429H9.4__anti  | 0        | 0.044985 | 0.076336 | 0.301933 | 3.15441  | 0.236762 | 0.149434 | 0        | 0.103706 | -4.92793 | -1.06111 | 3.866827 | 0.340773 | 0.519656 | 0.371677 |
| RP11-42A4.1__lincR  | 0        | 0        | 0.09981  | 0        | 0        | 17.0612  | 0        | 0        | 0        | -7.41732 | #DIV/0!  | #DIV/0!  | 0.42265  | 0.42265  | 0.42265  |
| RP11-430B1.2__linc  | 0        | 0        | 0        | 0        | 51.0743  | 10.2194  | 0        | 0        | 0        | #NUM!    | #DIV/0!  | #DIV/0!  | 0.320595 | #DIV/0!  | 0.320595 |
| RP11-430H10.1__lin  | 0.04288  | 0        | 0.128425 | 0        | 11.5053  | 4.54525  | 0.447015 | 0        | 0.158268 | -6.54992 | -1.82105 | 4.728869 | 0.256098 | 0.381699 | 0.276274 |
| RP11-430H10.4__lin  | 0        | 0.107385 | 0.86947  | 7.41132  | 8.04428  | 118.797  | 1.31184  | 0        | 0.037205 | -7.10259 | -0.46572 | 6.636868 | 0.350257 | 0.862013 | 0.356212 |
| RP11-430L16.1__lin  | 0        | 0        | 1.23064  | 0        | 4.46657  | 118.169  | 0.593081 | 0        | 0        | -6.63882 | 1.053108 | 7.691933 | 0.401034 | 0.73055  | 0.404158 |
| RP11-431K24.1__lin  | 38.3548  | 13.993   | 40.3666  | 5.30631  | 6.98811  | 37.9507  | 12.6841  | 7.65541  | 9.54654  | 0.88381  | 1.633321 | 0.749511 | 0.276044 | 0.106733 | 0.599571 |
| RP11-431K24.3__lin  | 0        | 0        | 0        | 0        | 1.18261  | 7.48706  | 0        | 0        | 0        | #NUM!    | #DIV/0!  | #DIV/0!  | 0.339642 | #DIV/0!  | 0.339642 |
| RP11-431K24.4__lin  | 0        | 0        | 0.499946 | 0        | 19.4976  | 0        | 0        | 0        | 0.089799 | -5.28538 | 2.477001 | 7.762381 | 0.437639 | 0.42265  | 0.425315 |
| RP11-431M7.2__ant   | 3.80724  | 0.031418 | 0.954245 | 0.186302 | 19.2617  | 8.61012  | 1.75508  | 1.16544  | 5.92966  | -2.54945 | -0.88481 | 1.66464  | 0.360754 | 0.574111 | 0.396013 |
| RP11-431M7.3__ant   | 0        | 0        | 0        | 0        | 2.51265  | 3.86577  | 0        | 0        | 0        | #NUM!    | #DIV/0!  | #DIV/0!  | 0.201278 | #DIV/0!  | 0.201278 |
| RP11-432I5.1__antis | 39.6042  | 0.11341  | 2.19389  | 0.028426 | 4.47421  | 10.1344  | 0.262325 | 0        | 0.046576 | 1.517723 | 7.084056 | 5.566334 | 0.612139 | 0.390383 | 0.250557 |
| RP11-432J24.3__an   | 0.128505 | 0.037896 | 0.16053  | 0        | 0        | 2.03851  | 0.062753 | 0        | 0.034834 | -2.64046 | 1.74422  | 4.384675 | 0.475141 | 0.098193 | 0.441006 |
| RP11-432J24.5__linc | 0.225087 | 0        | 0        | 0.073736 | 0        | 0        | 0        | 0        | 0        | 1.610046 | #DIV/0!  | #DIV/0!  | 0.42265  | 0.42265  | 0.42265  |
| RP11-432M24.4__ps   | 0        | 1.0242   | 0        | 0.736127 | 0        | 5.15271  | 0.826529 | 0        | 0.305454 | -2.52349 | -0.14435 | 2.37913  | 0.470559 | 0.953942 | 0.433516 |
| RP11-433J20.1__linc | 0.09121  | 0.107556 | 0.156549 | 0.155848 | 4.02054  | 6.97073  | 0.167279 | 0        | 0.02838  | -4.97143 | 0.860757 | 5.832187 | 0.207098 | 0.49849  | 0.211867 |
| RP11-433J8.2__lincl | 0        | 0        | 2.14641  | 0        | 2.62206  | 27.1076  | 0.871016 | 0        | 0        | -3.79191 | 1.301155 | 5.09306  | 0.365493 | 0.682116 | 0.388523 |
| RP11-434B12.1__lin  | 0.456677 | 0.210334 | 0.118964 | 0.157661 | 1.56774  | 2.10271  | 0.232862 | 0.918033 | 0.691904 | -2.28408 | -1.22934 | 1.054734 | 0.274893 | 0.349271 | 0.262899 |
| RP11-434C1.1__linc  | 0.350711 | 0.074641 | 0.146194 | 2.61782  | 1.69137  | 3.94986  | 0.16314  | 0.181848 | 0.183713 | -3.85303 | 0.112419 | 3.965452 | 0.058461 | 0.887191 | 0.05884  |
| RP11-434D2.12__lin  | 0        | 0        | 0        | 0.061205 | 0        | 0        | 0.055312 | 0        | 0.033495 | #NUM!    | #NUM!    | -0.53704 | 0.42265  | 0.20708  | 0.531411 |
| RP11-434D9.1__linc  | 93.3523  | 1.59828  | 1.05107  | 29.2141  | 76.8907  | 145.198  | 0.776913 | 5.13626  | 0.064459 | -1.3883  | 4.005413 | 5.393709 | 0.487103 | 0.439003 | 0.138352 |
| RP11-434E6.2__linc  | 0        | 0.019765 | 0.033549 | 0.155724 | 1.93872  | 1.98823  | 0.032846 | 0        | 0.091182 | -6.25887 | -1.2181  | 5.040777 | 0.152085 | 0.410167 | 0.15826  |



|                     |          |          |          |          |          |          |          |          |          |          |          |          |          |          |          |
|---------------------|----------|----------|----------|----------|----------|----------|----------|----------|----------|----------|----------|----------|----------|----------|----------|
| RP11-435B5.4__linc  | 6.95307  | 1.28156  | 1.03535  | 2.85381  | 5.93609  | 11.9185  | 2.61792  | 1.59757  | 1.90909  | -1.15958 | 0.597955 | 1.757533 | 0.472797 | 0.590401 | 0.228359 |
| RP11-435B5.6__linc  | 0        | 0        | 1.57895  | 0        | 0        | 12.7693  | 0        | 0        | 0        | -3.01564 | #DIV/0!  | #DIV/0!  | 0.42265  | 0.42265  | 0.42265  |
| RP11-435B5.7__linc  | 0        | 0        | 0.051607 | 0.089242 | 0.41811  | 6.47636  | 0.407049 | 0        | 0        | -7.08029 | -2.97957 | 4.10072  | 0.378432 | 0.499851 | 0.415626 |
| RP11-435M3.2__ant   | 0        | 0        | 1.16643  | 0        | 0.09     | 6.32926  | 0.103121 | 0        | 0        | -2.46031 | 3.49969  | 5.959997 | 0.412674 | 0.475737 | 0.423981 |
| RP11-436A7.1__linc  | 0        | 0        | 0        | 0        | 0.197402 | 0        | 0        | 0        | 0        | #NUM!    | #DIV/0!  | #DIV/0!  | 0.42265  | #DIV/0!  | 0.42265  |
| RP11-436D10.3__an   | 5.99834  | 3.44897  | 3.64114  | 2.39873  | 1.21198  | 46.9181  | 1.92985  | 4.25105  | 4.51601  | -1.94881 | 0.2911   | 2.239912 | 0.502893 | 0.674203 | 0.459066 |
| RP11-436K8.1__linc  | 10.7166  | 2.13782  | 0.468171 | 24.847   | 9.54552  | 33.9462  | 1.45692  | 29.2696  | 0.581369 | -2.35883 | -1.23265 | 1.126177 | 0.1435   | 0.637798 | 0.527725 |
| RP11-438D8.2__anti  | 3.1211   | 1.20041  | 3.74691  | 1.94982  | 10.9278  | 337.008  | 1.05734  | 9.50205  | 2.03027  | -5.43845 | -0.64188 | 4.796572 | 0.408083 | 0.700816 | 0.418661 |
| RP11-438F14.3__an   | 0        | 0        | 0.156114 | 0.068728 | 0.349814 | 0.471911 | 0.135574 | 0        | 0        | -2.51194 | 0.203519 | 2.715459 | 0.109786 | 0.942646 | 0.262827 |
| RP11-438L7.3__pse   | 39.522   | 67.1719  | 47.4834  | 20.7201  | 4.80393  | 92.9485  | 48.7999  | 26.9511  | 56.1383  | 0.380038 | 0.225263 | -0.15477 | 0.740499 | 0.694888 | 0.849068 |
| RP11-438N16.1__lin  | 0.061772 | 0.707443 | 2.96131  | 0.208697 | 23.1569  | 13.6546  | 2.57897  | 4.48332  | 5.48107  | -3.31086 | -1.74947 | 1.561389 | 0.227083 | 0.019756 | 0.311367 |
| RP11-439A17.10__a   | 3.29866  | 0.224479 | 1.05388  | 0.408909 | 1.56672  | 0.413825 | 0        | 0.44597  | 0.738312 | 0.937727 | 1.950396 | 1.012668 | 0.611377 | 0.410199 | 0.437212 |
| RP11-439A17.9__an   | 0        | 0.133901 | 0.158353 | 3.82043  | 0.24384  | 2.31391  | 0.379267 | 0.010764 | 0.072143 | -4.44785 | -0.66121 | 3.786638 | 0.199238 | 0.759533 | 0.169673 |
| RP11-439C8.1__linc  | 0        | 0        | 0.266574 | 0        | 0.760519 | 0        | 0        | 0        | 0        | -1.51245 | #DIV/0!  | #DIV/0!  | 0.646129 | 0.42265  | 0.42265  |
| RP11-439C8.2__linc  | 0        | 0.262139 | 0        | 0        | 0        | 0        | 0        | 0        | 0        | #DIV/0!  | #DIV/0!  | #DIV/0!  | 0.42265  | 0.42265  | #DIV/0!  |
| RP11-439E19.8__ps   | 0.505228 | 0.994059 | 44.9819  | 1.01701  | 13.7645  | 505.513  | 2.74882  | 0.305127 | 0.187573 | -3.48461 | 3.841905 | 7.326514 | 0.406227 | 0.443451 | 0.409464 |
| RP11-43F13.1__pse   | 63.3318  | 28.6667  | 18.7545  | 13.6652  | 9.11732  | 29.2066  | 20.4573  | 45.0478  | 37.7967  | 1.091064 | 0.10048  | -0.99058 | 0.376213 | 0.913425 | 0.211299 |
| RP11-43N5.1__lincR  | 0.037799 | 0        | 0.41644  | 0.184409 | 1.77565  | 4.41421  | 0.122886 | 1.18263  | 0.030898 | -3.81074 | -1.55684 | 2.253892 | 0.219084 | 0.591493 | 0.34249  |
| RP11-440I14.2__linc | 1.07004  | 1.18103  | 0.771246 | 0.138817 | 0.998499 | 36.5986  | 6.18174  | 2.17069  | 1.08077  | -3.64221 | -1.64209 | 2.000119 | 0.440794 | 0.290365 | 0.54669  |
| RP11-440L14.1__an   | 1.71208  | 3.80644  | 2.30538  | 5.37512  | 17.9124  | 4.26956  | 2.4128   | 2.02146  | 2.83291  | -1.81646 | 0.106494 | 1.922957 | 0.225263 | 0.838383 | 0.278156 |
| RP11-440L14.3__lin  | 0        | 0        | 0        | 0        | 2.10673  | 54.9303  | 0        | 0.053441 | 0.106343 | #NUM!    | #NUM!    | 8.479631 | 0.400947 | 0.224882 | 0.401446 |
| RP11-442J17.3__linc | 0        | 0        | 0        | 0        | 0        | 0        | 0        | 0        | 0        | #DIV/0!  | #DIV/0!  | #DIV/0!  | #DIV/0!  | #DIV/0!  | #DIV/0!  |
| RP11-442N1.2__linc  | 0        | 0.023722 | 0.030223 | 0        | 0.129236 | 0.212193 | 0.08884  | 0.03301  | 0.010962 | -2.66203 | -1.29983 | 1.3622   | 0.210932 | 0.50169  | 0.498345 |
| RP11-442O18.1__lin  | 0        | 0        | 0        | 0        | 1.10273  | 0        | 0        | 0        | 0        | #NUM!    | #DIV/0!  | #DIV/0!  | 0.42265  | #DIV/0!  | 0.42265  |
| RP11-442O18.2__lin  | 0        | 0        | 0        | 0        | 0        | 0        | 0        | 0        | 0        | #DIV/0!  | #DIV/0!  | #DIV/0!  | #DIV/0!  | #DIV/0!  | #DIV/0!  |
| RP11-443A13.5__an   | 0.011728 | 0.027658 | 0.629142 | 0.046777 | 10.781   | 13.9801  | 0.103539 | 0        | 0.038326 | -5.21367 | 2.236465 | 7.450132 | 0.187025 | 0.491988 | 0.191959 |
| RP11-443B20.1__an   | 0        | 0        | 0        | 0        | 0        | 0        | 0        | 0        | 0        | #DIV/0!  | #DIV/0!  | #DIV/0!  | #DIV/0!  | #DIV/0!  | #DIV/0!  |
| RP11-443B7.2__linc  | 0        | 0        | 0        | 0        | 1.96831  | 0        | 0        | 0        | 0        | #NUM!    | #DIV/0!  | #DIV/0!  | 0.42265  | #DIV/0!  | 0.42265  |
| RP11-443N24.1__ps   | 6.69063  | 5.47175  | 6.19968  | 3.13615  | 3.77468  | 34.1909  | 3.40842  | 7.92415  | 5.1092   | -1.16247 | 0.159362 | 1.321834 | 0.535545 | 0.73851  | 0.515363 |
| RP11-443N24.2__lin  | 0        | 0        | 0        | 0.116936 | 3.54535  | 39.5717  | 0        | 0.482973 | 0        | #NUM!    | #NUM!    | 6.48408  | 0.371736 | 0.42265  | 0.378126 |
| RP11-443N24.3__lin  | 0        | 0        | 0        | 0        | 0        | 0        | 0.116703 | 0        | 0        | #DIV/0!  | #NUM!    | #NUM!    | #DIV/0!  | 0.42265  | 0.42265  |
| RP11-443N24.4__lin  | 0        | 0        | 0        | 0        | 22.2062  | 10.3263  | 0.23655  | 0        | 0        | #NUM!    | #NUM!    | 7.103593 | 0.23304  | 0.42265  | 0.238653 |
| RP11-443P15.2__ps   | 0.100491 | 0.402991 | 6.62247  | 0.510993 | 16.5406  | 9.93209  | 1.64784  | 0.407228 | 1.1725   | -1.92093 | 1.142635 | 3.063568 | 0.304258 | 0.602721 | 0.25431  |
| RP11-444D3.1__linc  | 0        | 1.44395  | 1.15204  | 3.12973  | 60.4742  | 62.5282  | 0.625794 | 1.39693  | 0        | -5.60251 | 0.359985 | 5.962493 | 0.163004 | 0.747709 | 0.167379 |
| RP11-444P10.1__lin  | 0        | 0        | 0.138141 | 0        | 0        | 0.348197 | 0.224635 | 0        | 0        | -1.33376 | -0.70144 | 0.632321 | 0.42265  | 0.810637 | 0.827838 |

|                    |          |          |          |          |          |          |          |          |          |          |          |          |          |          |          |
|--------------------|----------|----------|----------|----------|----------|----------|----------|----------|----------|----------|----------|----------|----------|----------|----------|
| RP11-445F12.1__an  | 0.063553 | 0.024984 | 0.190739 | 2.09471  | 10.4903  | 91.8143  | 6.20086  | 0.12571  | 0.390729 | -8.5462  | -4.58812 | 3.958087 | 0.348302 | 0.394763 | 0.387663 |
| RP11-445H22.4__an  | 0.199432 | 0.202236 | 0.993436 | 1.4669   | 10.4422  | 18.9543  | 1.15235  | 0.242952 | 0.305715 | -4.46745 | -0.28602 | 4.181428 | 0.178633 | 0.849797 | 0.207965 |
| RP11-445J9.1__linc | 0        | 0        | 0        | 0        | 0        | 0        | 0.29818  | 0        | 0        | #DIV/0!  | #NUM!    | #NUM!    | #DIV/0!  | 0.42265  | 0.42265  |
| RP11-445K13.2__an  | 0        | 0        | 0        | 0        | 0.18691  | 2.82537  | 0        | 0.387748 | 0        | #NUM!    | #NUM!    | 2.957665 | 0.385798 | 0.42265  | 0.46504  |
| RP11-445O3.1__linc | 0        | 0        | 0.036477 | 0.096721 | 0.097257 | 0        | 0.107122 | 0        | 0.059474 | -2.41082 | -2.19128 | 0.219538 | 0.359316 | 0.314329 | 0.8619   |
| RP11-445O3.2__linc | 0.017363 | 0.129488 | 1.24412  | 0.03855  | 8.04428  | 212.705  | 1.95661  | 0.031681 | 0.079263 | -7.31042 | -0.57183 | 6.738592 | 0.401401 | 0.827487 | 0.406546 |
| RP11-445O3.3__linc | 0        | 0        | 0.186109 | 0.058875 | 0.028433 | 36.311   | 0.138959 | 0        | 0        | -7.61158 | 0.421489 | 8.033068 | 0.421255 | 0.882796 | 0.423473 |
| RP11-445P17.3__lin | 0.251378 | 0.555829 | 1.50632  | 0.167146 | 0.6192   | 3.8461   | 0.570636 | 0        | 0.949388 | -1.00168 | 0.606    | 1.60768  | 0.428377 | 0.460481 | 0.398912 |
| RP11-446H18.5__lin | 1.53752  | 0.769493 | 0.668993 | 0.540649 | 11.0858  | 53.1556  | 0.72983  | 1.44041  | 0.235152 | -4.44414 | 0.307105 | 4.75125  | 0.333016 | 0.71002  | 0.330518 |
| RP11-446N19.1__lin | 0.967396 | 3.00997  | 5.24179  | 21.5051  | 65.3479  | 113.091  | 7.88825  | 19.1739  | 9.1277   | -4.43882 | -1.97288 | 2.465939 | 0.127807 | 0.135276 | 0.174783 |
| RP11-447M4.1__linc | 0        | 0.023278 | 0.118628 | 0.249498 | 0.900032 | 17.4485  | 0.058119 | 0.021595 | 0.032271 | -7.03407 | 0.341616 | 7.375688 | 0.385977 | 0.834071 | 0.388    |
| RP11-448G15.3__se  | 1.15628  | 1.78384  | 0.722963 | 1.34665  | 0        | 2.28551  | 0.564096 | 0.998767 | 0.361775 | 0.012231 | 0.928471 | 0.916241 | 0.992496 | 0.041919 | 0.57221  |
| RP11-449D8.1__linc | 0.038479 | 0.015125 | 0.205477 | 0.170472 | 2.23903  | 4.66816  | 0.150951 | 0.252415 | 0.013969 | -4.77179 | -0.6878  | 4.083995 | 0.210741 | 0.718878 | 0.240124 |
| RP11-449L23.2__an  | 0.026194 | 0        | 0.104904 | 0        | 0.753853 | 0.313522 | 0.17011  | 0.014318 | 0.071314 | -3.02535 | -0.96404 | 2.061303 | 0.309299 | 0.515319 | 0.411728 |
| RP11-449L23.3__an  | 0.039521 | 0.023304 | 0.375656 | 12.827   | 0.168613 | 0        | 0.174155 | 0        | 0.236349 | -4.88937 | 0.095117 | 4.984485 | 0.433331 | 0.917223 | 0.425892 |
| RP11-449P1.1__linc | 0        | 0        | 0        | 0        | 2.66782  | 0        | 0        | 0        | 0        | #NUM!    | #DIV/0!  | #DIV/0!  | 0.42265  | #DIV/0!  | 0.42265  |
| RP11-44F14.1__pse  | 0.209402 | 0.147462 | 0.561391 | 4.20928  | 1.88925  | 2.58687  | 0.238786 | 0        | 0.863275 | -3.24163 | -0.26324 | 2.978388 | 0.067686 | 0.685343 | 0.072957 |
| RP11-44F21.3__anti | 0        | 0.082249 | 0        | 0.015457 | 57.1756  | 12.6559  | 0        | 0        | 0        | -9.72998 | #DIV/0!  | #DIV/0!  | 0.311231 | 0.42265  | 0.311365 |
| RP11-44N21.4__pro  | 5.18824  | 1.58764  | 2.74552  | 1.83689  | 62.6166  | 15.8172  | 0.906276 | 5.13827  | 4.61106  | -3.07563 | -0.16237 | 2.913261 | 0.346478 | 0.888388 | 0.313749 |
| RP11-450H5.1__linc | 0        | 0        | 0        | 0        | 0        | 0        | 0.133471 | 0        | 0        | #DIV/0!  | #NUM!    | #NUM!    | #DIV/0!  | 0.42265  | 0.42265  |
| RP11-450H6.3__linc | 0.015696 | 0.018509 | 0.188527 | 0.041682 | 0        | 0.905607 | 0.567192 | 0        | 0        | -2.0885  | -1.34853 | 0.739967 | 0.417207 | 0.65895  | 0.79041  |
| RP11-450K4.1__linc | 0        | 0        | 0.113896 | 0        | 0        | 13.0265  | 0        | 0        | 0        | -6.83759 | #DIV/0!  | #DIV/0!  | 0.42265  | 0.42265  | 0.42265  |
| RP11-451G4.2__linc | 0.176394 | 0        | 0.743808 | 0        | 0        | 0        | 0        | 0.479193 | 0.127161 | #DIV/0!  | 0.60179  | #NUM!    | 0.305007 | 0.773675 | 0.29388  |
| RP11-451K18.7__ps  | 0        | 0        | 0.104856 | 0.230796 | 0.630624 | 0        | 0.204879 | 0.038082 | 0.303261 | -3.03831 | -2.38108 | 0.657229 | 0.357329 | 0.114377 | 0.726816 |
| RP11-451O13.1__ps  | 0.093371 | 0        | 0.186643 | 0        | 2.39606  | 0.691772 | 0.243233 | 0.067812 | 0        | -3.46302 | -0.15162 | 3.3114   | 0.338465 | 0.927987 | 0.343227 |
| RP11-452B18.2__lin | 0        | 0        | 0        | 0        | 6.07187  | 29.6625  | 0        | 0        | 0        | #NUM!    | #DIV/0!  | #DIV/0!  | 0.318596 | #DIV/0!  | 0.318596 |
| RP11-452C8.1__linc | 0.046756 | 0        | 0        | 0        | 0.296132 | 5.18894  | 0        | 0        | 0        | -6.87421 | #DIV/0!  | #DIV/0!  | 0.39591  | 0.42265  | 0.390692 |
| RP11-452D12.1__ps  | 0.790993 | 0        | 0.122166 | 0.053961 | 0.347222 | 3.63391  | 0        | 0.222164 | 0.044251 | -2.14366 | 1.777193 | 3.920857 | 0.500016 | 0.547553 | 0.394293 |
| RP11-452F19.3__lin | 8.71136  | 21.9016  | 2.13733  | 12.6483  | 6.71887  | 33.2512  | 1.10601  | 1.671    | 1.17914  | -0.68406 | 3.049339 | 3.733398 | 0.670792 | 0.231571 | 0.184645 |
| RP11-452H21.1__an  | 6.19212  | 7.6878   | 9.72054  | 14.4036  | 22.3487  | 95.0374  | 8.36242  | 6.47333  | 4.5262   | -2.48135 | 0.285591 | 2.766941 | 0.28167  | 0.575083 | 0.295154 |
| RP11-452H21.4__lin | 0.587581 | 0.153873 | 0.302429 | 0.173078 | 0        | 1.28082  | 1.0419   | 0.12213  | 0.263543 | -0.47797 | -0.4516  | 0.026362 | 0.779518 | 0.515355 | 0.988686 |
| RP11-452K12.4__an  | 5.79866  | 3.14737  | 8.08087  | 1.87824  | 2.09807  | 8.18894  | 2.08576  | 3.74696  | 2.99478  | 0.48505  | 0.947739 | 0.462689 | 0.308626 | 0.251626 | 0.646643 |
| RP11-452K12.7__an  | 0.947413 | 0.584931 | 1.13693  | 1.06116  | 5.64597  | 201.851  | 1.17534  | 1.15007  | 0.38272  | -6.28786 | -0.02085 | 6.267009 | 0.407953 | 0.976864 | 0.41024  |
| RP11-452L6.1__linc | 0.949131 | 1.13132  | 1.27944  | 3.32656  | 32.8713  | 5.3496   | 1.3594   | 1.90529  | 1.82827  | -3.62827 | -0.60009 | 3.028184 | 0.312904 | 0.032046 | 0.326012 |
| RP11-453A12.1__lin | 0        | 0.079107 | 0.11749  | 0        | 8.37634  | 9.09625  | 0.906381 | 0        | 0.036495 | -6.47371 | -2.26183 | 4.211882 | 0.184138 | 0.528298 | 0.22862  |

|                     |          |          |          |          |          |          |          |          |          |          |          |          |          |          |          |
|---------------------|----------|----------|----------|----------|----------|----------|----------|----------|----------|----------|----------|----------|----------|----------|----------|
| RP11-453O5.1__linc  | 0        | 0        | 0        | 0        | 2.33579  | 34.3314  | 0.126765 | 0        | 0        | #NUM!    | #NUM!    | 8.176189 | 0.384791 | 0.42265  | 0.386922 |
| RP11-454C18.2__an   | 23.5098  | 2.39624  | 3.49581  | 7.83618  | 5.25401  | 101.331  | 68.3259  | 3.43267  | 2.97081  | -1.96038 | -1.34577 | 0.614607 | 0.504802 | 0.416257 | 0.801569 |
| RP11-454K7.3__linc  | 0.075413 | 0        | 0.113192 | 0        | 0        | 0.252073 | 0.055397 | 0        | 0.082017 | -0.41848 | 0.456835 | 0.875313 | 0.76813  | 0.202242 | 0.629871 |
| RP11-454P21.1__lin  | 0.083951 | 0        | 2.03424  | 0        | 61.719   | 250.794  | 4.51801  | 0.018342 | 0.073077 | -7.20494 | -1.12176 | 6.083184 | 0.300799 | 0.703344 | 0.311619 |
| RP11-455F5.3__anti  | 4.1735   | 1.73766  | 1.89213  | 0.718034 | 8.76638  | 2.68742  | 0.672356 | 5.5315   | 4.09941  | -0.64139 | -0.40095 | 0.240445 | 0.67962  | 0.742925 | 0.694378 |
| RP11-456K23.1__lin  | 0.101961 | 0.10306  | 0.058325 | 0.077392 | 0.140107 | 0.081977 | 0.071399 | 0.160413 | 0.126856 | -0.18548 | -0.44569 | -0.26021 | 0.585749 | 0.417293 | 0.311306 |
| RP11-457P14.5__lin  | 0        | 0        | 0.137125 | 0.121067 | 0.194729 | 1.92069  | 1.21557  | 0        | 0.173784 | -4.02767 | -3.34085 | 0.686819 | 0.325972 | 0.405508 | 0.763796 |
| RP11-458D21.1__lin  | 4.86217  | 11.7356  | 1.83057  | 8.12061  | 6.55398  | 31.5457  | 1.16508  | 0.894691 | 3.40753  | -1.3266  | 1.753025 | 3.079626 | 0.47112  | 0.35279  | 0.203291 |
| RP11-459F6.3__anti  | 51.6487  | 24.1113  | 17.3894  | 7.52665  | 9.69533  | 34.3314  | 8.40971  | 16.1428  | 12.8725  | 0.853479 | 1.315544 | 0.462064 | 0.513981 | 0.272091 | 0.636237 |
| RP11-45P15.4__anti  | 0.05075  | 0.239538 | 0.101254 | 0.532954 | 0.427912 | 3.00643  | 0        | 0        | 0.10959  | -3.34092 | 1.83705  | 5.177968 | 0.300405 | 0.335563 | 0.251692 |
| RP11-460B17.3__lin  | 0        | 0        | 0.379677 | 0        | 239.823  | 248.682  | 0.829257 | 0        | 0        | -10.3294 | -1.12705 | 9.202338 | 0.183627 | 0.715402 | 0.185026 |
| RP11-460H9.1__linc  | 0        | 0        | 0        | 0        | 0        | 1.99109  | 0        | 0        | 0        | #NUM!    | #DIV/0!  | #DIV/0!  | 0.42265  | #DIV/0!  | 0.42265  |
| RP11-460I13.2__ant  | 0.540712 | 0.343336 | 0.810702 | 0.313147 | 0.370546 | 6.8234   | 0.517739 | 0.788046 | 0.588734 | -2.14718 | -0.16076 | 1.986423 | 0.442293 | 0.768195 | 0.481697 |
| RP11-460N16.1__lin  | 0.044557 | 0.03503  | 0.221372 | 0.078907 | 0.179334 | 10.7206  | 0.733345 | 0.243035 | 0.113175 | -5.18901 | -1.8561  | 3.332915 | 0.412884 | 0.374249 | 0.462768 |
| RP11-461K13.1__lin  | 0        | 0        | 1.28933  | 0        | 3.67195  | 2.42758  | 0        | 0        | 0        | -2.24208 | #DIV/0!  | #DIV/0!  | 0.277592 | 0.42265  | 0.199982 |
| RP11-461O7.1__linc  | 0.099177 | 0.025988 | 1.20145  | 0        | 177.245  | 29.6625  | 1.5153   | 0.108467 | 0.04638  | -7.28509 | -0.33223 | 6.952867 | 0.338725 | 0.891578 | 0.340241 |
| RP11-462L8.1__lincI | 277.012  | 213.727  | 148.911  | 57.0619  | 64.9642  | 370.709  | 96.9661  | 178.147  | 97.1714  | 0.37647  | 0.780877 | 0.404407 | 0.754838 | 0.190464 | 0.767189 |
| RP11-463H12.2__lin  | 0        | 0        | 0        | 0        | 1.83967  | 1.9827   | 0        | 0        | 0        | #NUM!    | #DIV/0!  | #DIV/0!  | 0.184074 | #DIV/0!  | 0.184074 |
| RP11-463I20.3__linc | 0.123945 | 0.146438 | 0        | 4.49302  | 1.30981  | 12.6556  | 0        | 0        | 0        | -6.09313 | #DIV/0!  | #DIV/0!  | 0.218626 | 0.186314 | 0.210198 |
| RP11-463J7.2__lincI | 0        | 0        | 1.7048   | 0.017907 | 19.7037  | 72.3795  | 0.066074 | 0        | 0.029349 | -5.75554 | 4.159123 | 9.914667 | 0.288669 | 0.445849 | 0.2916   |
| RP11-463M16.4__ps   | 28.2308  | 13.0846  | 15.7322  | 20.0695  | 13.6958  | 667.579  | 18.8488  | 22.0449  | 31.7047  | -3.61988 | -0.34777 | 3.272113 | 0.429382 | 0.563684 | 0.429172 |
| RP11-463O12.3__lin  | 0        | 0        | 0        | 0        | 0        | 10.7206  | 0        | 0        | 0        | #NUM!    | #DIV/0!  | #DIV/0!  | 0.42265  | #DIV/0!  | 0.42265  |
| RP11-463O9.5__ant   | 0.108856 | 0.149773 | 0.145246 | 0        | 0.154908 | 20.6125  | 0.124409 | 0.019815 | 0.118409 | -5.68427 | 0.620862 | 6.305131 | 0.425584 | 0.389663 | 0.422372 |
| RP11-463P17.1__lin  | 0        | 0        | 0.855798 | 0        | 0        | 1.90259  | 0.96291  | 0        | 0        | -1.15262 | -0.17013 | 0.982492 | 0.42265  | 0.951996 | 0.745578 |
| RP11-464C19.2__lin  | 0        | 0        | 0.354392 | 0.649846 | 3.63549  | 0        | 0.413712 | 0        | 0.229531 | -3.59599 | -0.86002 | 2.735973 | 0.388279 | 0.614091 | 0.423959 |
| RP11-464F9.1__proc  | 3.79757  | 2.58077  | 7.20083  | 7.36732  | 44.1787  | 65.2297  | 3.76969  | 12.6749  | 12.1207  | -3.10427 | -1.07287 | 2.031405 | 0.166561 | 0.229495 | 0.176645 |
| RP11-464O2.2__ant   | 0        | 0        | 0.094074 | 0        | 3.49335  | 0.089786 | 0.036833 | 0.143727 | 0.081797 | -5.25129 | -1.47967 | 3.771624 | 0.423359 | 0.3474   | 0.427657 |
| RP11-465B22.3__ps   | 0.185363 | 0.353399 | 0.950206 | 0.272967 | 2.39316  | 1.21417  | 0.158713 | 0.425786 | 0.692487 | -1.38185 | 0.22157  | 1.603424 | 0.329345 | 0.545052 | 0.262708 |
| RP11-465B22.5__lin  | 0.075771 | 0.111699 | 0.463173 | 1.85865  | 1.23109  | 18.2292  | 0.319261 | 0        | 0.257976 | -5.03413 | 0.172702 | 5.206828 | 0.333    | 0.874407 | 0.337617 |
| RP11-465L10.10__a   | 10.261   | 1.82512  | 2.83151  | 3.69097  | 2.31614  | 2.65899  | 0.54971  | 3.64896  | 0.846292 | 0.783564 | 1.564103 | 0.780539 | 0.452354 | 0.434442 | 0.458925 |
| RP11-465N4.4__anti  | 54.5463  | 45.2272  | 39.1019  | 42.4867  | 21.3453  | 18.2785  | 23.5339  | 36.7163  | 23.3816  | 0.758152 | 0.731668 | -0.02648 | 0.033315 | 0.108974 | 0.964769 |
| RP11-466F5.6__pse   | 0        | 0        | 3.6997   | 0        | 0.111672 | 4.7261   | 0.479697 | 0        | 0        | -0.38693 | 2.947213 | 3.334147 | 0.36359  | 0.501679 | 0.470476 |
| RP11-466F5.8__anti  | 1.29695  | 0.388736 | 0.674624 | 0.148132 | 1.92027  | 2.21753  | 0.245667 | 0        | 0        | -0.86063 | 3.2642   | 4.124833 | 0.547854 | 0.066752 | 0.205238 |
| RP11-466I1.1__lincF | 0        | 0        | 0        | 1.93829  | 3.44765  | 53.5455  | 0        | 0        | 0        | #NUM!    | #DIV/0!  | #DIV/0!  | 0.366303 | #DIV/0!  | 0.366303 |
| RP11-466L17.1__lin  | 0        | 0        | 0.111098 | 17.0648  | 7.45875  | 43.3722  | 0        | 0        | 0        | -9.25534 | #DIV/0!  | #DIV/0!  | 0.169089 | 0.42265  | 0.169527 |

|                     |          |          |          |          |          |          |          |          |          |          |          |          |          |          |          |
|---------------------|----------|----------|----------|----------|----------|----------|----------|----------|----------|----------|----------|----------|----------|----------|----------|
| RP11-466P24.2__ps   | 39.1002  | 39.0922  | 33.8164  | 19.1755  | 9.19646  | 7.47472  | 16.6919  | 43.2715  | 30.2508  | 1.643701 | 0.312186 | -1.33152 | 0.012952 | 0.454613 | 0.235554 |
| RP11-466P24.7__lin  | 0.028262 | 0.099983 | 0.014147 | 0.075092 | 0.075526 | 0        | 1.78923  | 0.169899 | 0        | -0.08103 | -3.78228 | -3.70124 | 0.913155 | 0.404853 | 0.391785 |
| RP11-467I17.1__linc | 0        | 0        | 0        | 0        | 3.14088  | 4.64012  | 0        | 0        | 0        | #NUM!    | #DIV/0!  | #DIV/0!  | 0.19825  | #DIV/0!  | 0.19825  |
| RP11-467J12.4__an   | 0.439209 | 3.62328  | 1.86031  | 1.77741  | 3.5104   | 16.2644  | 0.548547 | 1.85158  | 2.75977  | -1.86348 | 0.198937 | 2.062422 | 0.376241 | 0.778657 | 0.307243 |
| RP11-467K18.2__an   | 1.25926  | 0.278502 | 0.945833 | 0.23331  | 2.77161  | 95.9374  | 3.2125   | 0.241819 | 6.00657  | -5.31609 | -1.92955 | 3.38654  | 0.413968 | 0.25741  | 0.426077 |
| RP11-467L19.8__ps   | 0.14878  | 0.371521 | 0.542148 | 0.513844 | 0.830113 | 0.910177 | 0.367369 | 0.25639  | 0.182945 | -1.08518 | 0.397282 | 1.482462 | 0.005918 | 0.661314 | 0.108905 |
| RP11-467L20.10__li  | 0        | 0        | 0        | 0        | 0        | 3.86578  | 0.58771  | 0        | 0        | #NUM!    | #NUM!    | 2.717583 | 0.42265  | 0.42265  | 0.515985 |
| RP11-468D11.1__lin  | 0        | 0        | 0        | 0        | 1.70854  | 5.08748  | 0        | 0        | 0        | #NUM!    | #DIV/0!  | #DIV/0!  | 0.268884 | #DIV/0!  | 0.268884 |
| RP11-469A15.2__lin  | 0        | 0        | 0.677678 | 0        | 0        | 3.92105  | 0        | 0        | 0        | -2.53257 | #DIV/0!  | #DIV/0!  | 0.42265  | 0.42265  | 0.42265  |
| RP11-469H8.6__anti  | 1.11267  | 0.03927  | 0.548278 | 0.486227 | 2.51285  | 4.50384  | 0.207541 | 0.04545  | 1.53731  | -2.14173 | -0.07448 | 2.067249 | 0.28828  | 0.961207 | 0.147448 |
| RP11-469L4.1__lincl | 0        | 0        | 0        | 0.149385 | 25.0774  | 1.33531  | 0        | 0        | 0        | #NUM!    | #DIV/0!  | #DIV/0!  | 0.389344 | #DIV/0!  | 0.389344 |
| RP11-469M7.1__linc  | 3.07532  | 1.85241  | 1.66692  | 3.79899  | 1.14449  | 3.24556  | 1.56361  | 2.12188  | 2.27482  | -0.3124  | 0.145909 | 0.458307 | 0.509148 | 0.778239 | 0.509946 |
| RP11-46A10.5__anti  | 1.77903  | 3.13786  | 0.969117 | 6.26639  | 7.80557  | 15.2483  | 4.1923   | 0.143576 | 1.37121  | -2.31654 | 0.044535 | 2.361072 | 0.137056 | 0.973285 | 0.147236 |
| RP11-46E17.6__linc  | 0        | 0        | 1.00642  | 0        | 1.0837   | 1.91695  | 0        | 0.0969   | 0.096426 | -1.57604 | 2.380123 | 3.956165 | 0.186564 | 0.487029 | 0.217291 |
| RP11-46I8.3__antise | 0        | 0        | 0.289374 | 0        | 0        | 3.14428  | 0        | 0.078533 | 0        | -3.44172 | 1.88157  | 5.323292 | 0.42265  | 0.594021 | 0.437245 |
| RP11-470E16.1__pri  | 0.034087 | 0.262221 | 0.687885 | 0.134968 | 122.616  | 10.918   | 0.155758 | 0.144892 | 0.184717 | -7.08551 | 1.019865 | 8.105373 | 0.376078 | 0.457427 | 0.374547 |
| RP11-470L19.2__lin  | 0        | 0        | 0.141881 | 2.37216  | 0        | 0.569508 | 0.459123 | 0        | 0.206694 | -4.37388 | -2.23044 | 2.143437 | 0.329381 | 0.347615 | 0.325182 |
| RP11-472B18.1__ps   | 0.111463 | 0.087635 | 0.260257 | 0.221794 | 7.15914  | 3.41608  | 0.27295  | 0.101437 | 0.101027 | -4.55488 | -0.04958 | 4.505304 | 0.229332 | 0.959192 | 0.235773 |
| RP11-472G21.2__lin  | 0.073244 | 0        | 0.218726 | 0.381801 | 3.94456  | 0.136532 | 0        | 0        | 0.393405 | -3.93409 | -0.43019 | 3.503892 | 0.391508 | 0.690817 | 0.408377 |
| RP11-472K22.1__lin  | 0        | 0        | 0.112437 | 0.147764 | 0.118602 | 4.88287  | 0.474086 | 0        | 0.182406 | -5.51717 | -2.54566 | 2.971509 | 0.390893 | 0.34454  | 0.449663 |
| RP11-472N13.3__lin  | 0.274677 | 0        | 0        | 0        | 3.59409  | 1.88914  | 1.40286  | 0        | 0        | -4.31922 | -2.35256 | 1.966655 | 0.261071 | 0.42265  | 0.45161  |
| RP11-473A10.2__lin  | 0        | 0        | 0.595671 | 0        | 9.80091  | 5.15271  | 0.857421 | 0        | 0.268938 | -4.64984 | -0.91908 | 3.730756 | 0.233054 | 0.66608  | 0.273188 |
| RP11-473C19.1__an   | 0        | 0        | 1.48551  | 0        | 7.99119  | 10.7254  | 0.831897 | 0        | 0.244233 | -3.65529 | 0.465106 | 4.120393 | 0.185639 | 0.841825 | 0.228797 |
| RP11-473I1.10__ser  | 8.88828  | 12.5672  | 6.10093  | 4.69202  | 3.89273  | 5.00452  | 8.45012  | 94.6669  | 8.70529  | 1.01992  | -2.02075 | -3.04067 | 0.168522 | 0.407723 | 0.376261 |
| RP11-473L15.2__an   | 0        | 0.018816 | 1.55447  | 0.105921 | 2.95911  | 8.80473  | 0.031275 | 0.104601 | 1.56909  | -2.91544 | -0.11596 | 2.799476 | 0.240249 | 0.177847 | 0.24555  |
| RP11-473M10.3__lin  | 0        | 0        | 0        | 0        | 0        | 0        | 0.186956 | 0        | 0        | #DIV/0!  | #NUM!    | #NUM!    | #DIV/0!  | 0.42265  | 0.42265  |
| RP11-473M20.14__ε   | 1.44232  | 1.49242  | 2.05675  | 39.6402  | 2.54508  | 11.0557  | 2.5534   | 2.38596  | 2.30679  | -3.41499 | -0.53774 | 2.877251 | 0.29041  | 0.100743 | 0.303109 |
| RP11-473M20.5__ar   | 0        | 2.64121  | 0        | 8.39051  | 1032.98  | 2.50074  | 0.333863 | 0        | 0.370471 | -8.62653 | 1.906867 | 10.5334  | 0.416568 | 0.583964 | 0.416975 |
| RP11-473N11.2__ps   | 69.7639  | 33.9352  | 26.392   | 29.5581  | 10.6376  | 53.5455  | 23.6549  | 43.2859  | 18.3411  | 0.472767 | 0.609211 | 0.136444 | 0.610059 | 0.457997 | 0.899039 |
| RP11-474D1.1__linc  | 0        | 0        | 0        | 0        | 0        | 0        | 0.709103 | 0        | 0        | #DIV/0!  | #NUM!    | #NUM!    | #DIV/0!  | 0.42265  | 0.42265  |
| RP11-474D1.2__linc  | 0        | 0.020987 | 0.071237 | 0        | 1.75918  | 0.238052 | 0.38034  | 0.206454 | 0        | -4.43671 | -2.66964 | 1.767076 | 0.370135 | 0.334569 | 0.496171 |
| RP11-474D1.3__linc  | 66.2899  | 23.4176  | 0.123712 | 3.21243  | 2.83699  | 4.73719  | 0.353947 | 2.86698  | 3.12391  | 3.057975 | 3.823562 | 0.765587 | 0.313844 | 0.302744 | 0.218737 |
| RP11-474N8.5__sen   | 0.352443 | 0        | 1.09528  | 0        | 1.28589  | 0.205627 | 0.153399 | 0.042757 | 0.106457 | -0.04299 | 2.258239 | 2.301234 | 0.984226 | 0.345133 | 0.453701 |
| RP11-474P2.2__anti  | 0        | 27.2159  | 27.1538  | 12.5379  | 2.92866  | 10.918   | 0.112257 | 36.606   | 26.6628  | 1.043109 | -0.22125 | -1.26436 | 0.491768 | 0.446732 | 0.455071 |
| RP11-475A13.1__lin  | 0.672129 | 0        | 0        | 0        | 0        | 72.3795  | 0        | 0        | 0        | -6.7507  | #DIV/0!  | #DIV/0!  | 0.428036 | 0.42265  | 0.42265  |

|                     |          |          |          |          |          |          |          |          |          |          |          |          |          |          |          |
|---------------------|----------|----------|----------|----------|----------|----------|----------|----------|----------|----------|----------|----------|----------|----------|----------|
| RP11-475A13.2__lin  | 0        | 0        | 0.036724 | 0        | 1.4258   | 0.456729 | 0.047966 | 0        | 0.013316 | -5.67979 | -0.73874 | 4.941051 | 0.283037 | 0.734347 | 0.296153 |
| RP11-475B2.1__linc  | 0        | 0        | 0        | 0        | 0        | 1.32457  | 0.069829 | 0        | 0        | #NUM!    | #NUM!    | 4.245564 | 0.42265  | 0.42265  | 0.453845 |
| RP11-475D12.1__lin  | 0        | 0        | 0        | 0        | 0        | 2.91825  | 0        | 0        | 0        | #NUM!    | #DIV/0!  | #DIV/0!  | 0.42265  | #DIV/0!  | 0.42265  |
| RP11-475D12.2__lin  | 0.022109 | 0        | 0.271191 | 0.132307 | 0.14197  | 8.51284  | 0.184375 | 0.02418  | 0.125134 | -4.90494 | -0.18613 | 4.718814 | 0.405126 | 0.893839 | 0.418194 |
| RP11-475N22.4__an   | 2.57393  | 0.206667 | 1.79143  | 12.5142  | 1.59133  | 3.1877   | 0.816633 | 2.14464  | 0.484258 | -1.9193  | 0.408108 | 2.327409 | 0.275175 | 0.777607 | 0.334786 |
| RP11-476H20.1__lin  | 0        | 0.44522  | 0        | 0.488027 | 2.56744  | 0.696319 | 0.181693 | 0        | 0        | -3.07499 | 1.293016 | 4.368003 | 0.16498  | 0.683598 | 0.230257 |
| RP11-476M19.2__lin  | 0        | 0        | 0        | 0        | 0        | 1.78416  | 6.41671  | 0        | 0        | #NUM!    | #NUM!    | -1.84659 | 0.42265  | 0.42265  | 0.598416 |
| RP11-478B9.1__anti  | 0.291752 | 0.267344 | 0.411864 | 0.350647 | 52.1805  | 17.6396  | 0.134512 | 0.768945 | 0.430895 | -6.17531 | -0.45866 | 5.716659 | 0.269568 | 0.601142 | 0.266951 |
| RP11-478C19.2__pr   | 39.6484  | 19.8935  | 23.5314  | 704.394  | 11.3304  | 413.592  | 21.1294  | 43.1577  | 28.3377  | -3.76492 | -0.15701 | 3.607907 | 0.216319 | 0.81692  | 0.237573 |
| RP11-478H13.3__lin  | 0        | 0        | 1.97171  | 0.090678 | 2.01005  | 20.1469  | 0.081732 | 0        | 0.033007 | -3.49613 | 4.10302  | 7.599152 | 0.359829 | 0.447481 | 0.367845 |
| RP11-478K15.6__lin  | 0        | 0.916921 | 1.64161  | 0        | 2.82957  | 3.03836  | 1.16342  | 0        | 0        | -1.19754 | 1.136944 | 2.33448  | 0.193247 | 0.635724 | 0.370066 |
| RP11-478K7.2__linc  | 0        | 0        | 0.146577 | 0.194415 | 0.967686 | 21.5477  | 0.841657 | 0.071111 | 0.141657 | -7.27551 | -2.84673 | 4.428787 | 0.391945 | 0.379466 | 0.416703 |
| RP11-478P10.1__lin  | 0        | 0.025166 | 0.097766 | 0.028421 | 0.045755 | 34.3314  | 0.090819 | 0        | 0.031034 | -8.12863 | 0.012732 | 8.14136  | 0.421823 | 0.9946   | 0.422931 |
| RP11-479G22.8__lin  | 0.998976 | 1.13431  | 6.89151  | 2.38655  | 3.23663  | 4.83086  | 4.03238  | 3.33615  | 1.50534  | -0.21209 | 0.024331 | 0.236425 | 0.746447 | 0.986721 | 0.754216 |
| RP11-479J7.1__linc  | 0.041914 | 0.148353 | 0        | 0        | 6.70357  | 8.4713   | 0.122552 | 0        | 0.045346 | -6.31751 | 0.180442 | 6.497954 | 0.192327 | 0.926131 | 0.195367 |
| RP11-47L3.1__lincR  | 0.346365 | 0.122578 | 0.242244 | 0.117029 | 1.98939  | 1.77979  | 0.304291 | 0.226241 | 0.187672 | -2.45006 | -0.01416 | 2.435898 | 0.245429 | 0.967454 | 0.232454 |
| RP11-47P18.1__linc  | 1.06316  | 0        | 0.30431  | 0        | 0.78647  | 0        | 0.297189 | 0.082866 | 0        | 0.798046 | 1.847231 | 1.049185 | 0.752807 | 0.311793 | 0.692791 |
| RP11-47P18.2__linc  | 0        | 0        | 0        | 0        | 1.01072  | 23.698   | 0        | 0        | 0        | #NUM!    | #DIV/0!  | #DIV/0!  | 0.398572 | #DIV/0!  | 0.398572 |
| RP11-480C22.1__lin  | 0        | 0.284815 | 0        | 0        | 70.7841  | 148.732  | 0        | 0        | 0        | -9.59009 | #DIV/0!  | #DIV/0!  | 0.231    | 0.42265  | 0.230572 |
| RP11-480D4.1__linc  | 2.18485  | 0.917905 | 3.28217  | 35.5581  | 4.47421  | 134.636  | 0.801004 | 1.1466   | 2.05362  | -4.7738  | 0.674228 | 5.448033 | 0.283354 | 0.261909 | 0.281309 |
| RP11-480I12.5__pse  | 1.44458  | 1.1809   | 1.42526  | 1.80318  | 68.0842  | 273.55   | 1.10802  | 0.874969 | 1.27258  | -6.40572 | 0.315276 | 6.720994 | 0.300767 | 0.043096 | 0.299684 |
| RP11-480I12.7__linc | 1.23336  | 0.416656 | 0.115581 | 2.66608  | 2.09796  | 53.9086  | 0.473403 | 0.190476 | 0.345611 | -5.05446 | 0.806529 | 5.860989 | 0.389742 | 0.471243 | 0.379367 |
| RP11-481J13.1__linc | 0.016782 | 0        | 0.874905 | 0.067009 | 5.477    | 25.6659  | 0.579036 | 0        | 0.03659  | -5.12932 | 0.534483 | 5.663807 | 0.310554 | 0.842102 | 0.32615  |
| RP11-481J2.2__linc  | 0.012577 | 0.069202 | 0.358929 | 0.111757 | 21.2284  | 4.31206  | 0.597865 | 0.022956 | 0.090312 | -5.86312 | -0.6903  | 5.172819 | 0.323786 | 0.758179 | 0.33418  |
| RP11-482D24.2__an   | 0        | 0        | 0        | 0.255953 | 12.7412  | 1.97455  | 0        | 0        | 0        | #NUM!    | #DIV/0!  | #DIV/0!  | 0.329712 | #DIV/0!  | 0.329712 |
| RP11-482E14.2__lin  | 0        | 0        | 0.545144 | 0        | 0        | 31.7692  | 0.845587 | 0        | 0        | -5.86485 | -0.63332 | 5.231532 | 0.42265  | 0.827588 | 0.438216 |
| RP11-482H16.1__pr   | 0.242504 | 0.620089 | 2.47486  | 67.3884  | 5.04384  | 46.083   | 1.29016  | 0.617657 | 0.315116 | -5.15018 | 0.586283 | 5.736464 | 0.170705 | 0.731937 | 0.16614  |
| RP11-482M8.1__linc  | 0.084542 | 0.434881 | 0        | 0        | 8.20462  | 9.36856  | 1.365    | 0.291944 | 0        | -5.08032 | -1.67354 | 3.406779 | 0.191063 | 0.490265 | 0.25525  |
| RP11-482M8.3__ant   | 0        | 0.043442 | 0.202738 | 0        | 0.255517 | 0.246303 | 0.720674 | 0        | 0.080131 | -1.02746 | -1.70174 | -0.67428 | 0.318284 | 0.56274  | 0.779394 |
| RP11-483C6.1__sen   | 0.10297  | 0        | 0.051527 | 0.022777 | 0        | 0.082012 | 0.016815 | 0.262454 | 0        | 0.560098 | -0.85408 | -1.41418 | 0.665481 | 0.743637 | 0.63373  |
| RP11-483P21.2__an   | 29.7284  | 21.5531  | 11.0225  | 6.99213  | 5.8575   | 8.07681  | 9.4534   | 24.2303  | 21.8644  | 1.573998 | 0.165587 | -1.40841 | 0.140185 | 0.83149  | 0.134768 |
| RP11-484D2.2__anti  | 17.9576  | 12.3139  | 10.4886  | 36.6614  | 21.32    | 7.09924  | 25.6427  | 13.7777  | 16.2893  | -0.67507 | -0.45077 | 0.2243   | 0.33244  | 0.11377  | 0.66623  |
| RP11-484N16.1__lin  | 0        | 2.03273  | 0.592238 | 1.99483  | 0        | 0        | 0        | 0        | 0        | 0.396034 | #DIV/0!  | #DIV/0!  | 0.874935 | 0.2842   | 0.42265  |
| RP11-486A14.2__an   | 49.6152  | 51.5286  | 215.958  | 25.6561  | 11.7375  | 96.2828  | 12.6818  | 59.2628  | 79.8583  | 1.246201 | 1.062747 | -0.18345 | 0.175052 | 0.324275 | 0.798473 |
| RP11-486G15.2__lin  | 0.12118  | 0        | 0.096957 | 0.128364 | 0        | 0        | 0.047421 | 0        | 0        | 0.764994 | 2.201624 | 1.43663  | 0.46689  | 0.190939 | 0.42265  |

|                     |          |          |          |          |          |          |          |          |          |          |          |          |          |          |          |
|---------------------|----------|----------|----------|----------|----------|----------|----------|----------|----------|----------|----------|----------|----------|----------|----------|
| RP11-486O13.4__lin  | 1.49041  | 2.19646  | 1.30931  | 33.7562  | 9.4843   | 72.485   | 0.545668 | 1.04749  | 0.048291 | -4.53374 | 1.605856 | 6.139593 | 0.185473 | 0.006785 | 0.178029 |
| RP11-488I20.3__linc | 0.010518 | 0.080513 | 0.094795 | 0.027978 | 4.89989  | 0.190861 | 1.36794  | 0        | 0.091683 | -4.78377 | -2.97358 | 1.81019  | 0.409171 | 0.45917  | 0.5842   |
| RP11-488I20.8__linc | 0        | 0        | 0        | 0        | 4.34374  | 43.0083  | 0        | 0        | 0        | #NUM!    | #DIV/0!  | #DIV/0!  | 0.367556 | #DIV/0!  | 0.367556 |
| RP11-488I20.9__linc | 0.034429 | 0.011643 | 0.103371 | 0.052545 | 0.496902 | 0.240321 | 0.098893 | 0.021603 | 0.093645 | -2.40183 | -0.51897 | 1.882864 | 0.267269 | 0.433607 | 0.334753 |
| RP11-489G11.3__lin  | 0.499432 | 2.53935  | 0        | 2.90369  | 0        | 73.0158  | 0.670707 | 0        | 0.044172 | -4.64291 | 2.087721 | 6.730627 | 0.424378 | 0.472911 | 0.405261 |
| RP11-48F14.1__linc  | 0        | 0.068251 | 0.493791 | 0.84616  | 8.58613  | 200.636  | 1.69181  | 0.559373 | 1.30394  | -8.54596 | -2.66115 | 5.884815 | 0.396189 | 0.108795 | 0.40234  |
| RP11-48O20.4__linc  | 0        | 0        | 0        | 11.0208  | 2.6749   | 899.74   | 15.555   | 0        | 0        | #NUM!    | #NUM!    | 5.875853 | 0.413908 | 0.42265  | 0.423853 |
| RP11-490G2.2__linc  | 0        | 0.515411 | 0.016774 | 0        | 0        | 0        | 0.032846 | 0.018309 | 0.018236 | #DIV/0!  | 2.939092 | #NUM!    | 0.404175 | 0.463668 | 0.041387 |
| RP11-490O24.2__lin  | 0        | 0        | 0        | 0        | 2.02349  | 1.50275  | 0        | 0        | 0        | #NUM!    | #DIV/0!  | #DIV/0!  | 0.192264 | #DIV/0!  | 0.192264 |
| RP11-491F9.5__linc  | 0        | 0.018223 | 0.108273 | 0.102598 | 0.561317 | 2.567    | 0.121168 | 0        | 0.050456 | -4.67478 | -0.44017 | 4.23462  | 0.288778 | 0.807693 | 0.314983 |
| RP11-491H19.1__lin  | 0        | 0        | 0        | 0        | 2.14464  | 15.2215  | 1.45361  | 0        | 0        | #NUM!    | #NUM!    | 3.578565 | 0.347746 | 0.42265  | 0.404996 |
| RP11-493K19.3__an   | 16.5585  | 18.6379  | 9.03436  | 8.23805  | 8.78913  | 21.3235  | 9.59955  | 20.2938  | 13.231   | 0.205798 | 0.036547 | -0.16925 | 0.809401 | 0.922977 | 0.804969 |
| RP11-493L12.3__an   | 0.679523 | 4.77711  | 1.08389  | 4.08456  | 10.8527  | 2.71273  | 3.94413  | 0.950105 | 1.34425  | -1.43219 | 0.06821  | 1.5004   | 0.10326  | 0.96538  | 0.341004 |
| RP11-494M8.4__ser   | 0.105746 | 0.043614 | 0.426178 | 0.220772 | 17.5071  | 208.562  | 0.911482 | 0.025888 | 0.114577 | -8.61904 | -0.87008 | 7.748967 | 0.376081 | 0.681676 | 0.37833  |
| RP11-495K9.3__linc  | 0.023843 | 0        | 0.155005 | 0.005262 | 0.211593 | 0.824081 | 0.05832  | 0.255123 | 0        | -2.54108 | -0.80947 | 1.731606 | 0.29097  | 0.741406 | 0.492077 |
| RP11-495K9.5__linc  | 0        | 0        | 0        | 0        | 0        | 9.61085  | 0.784231 | 0.058329 | 0        | #NUM!    | #NUM!    | 3.511812 | 0.42265  | 0.381416 | 0.475019 |
| RP11-495K9.6__linc  | 0.08559  | 0        | 0.279306 | 0.165487 | 2.34281  | 0.131677 | 0.028944 | 0.064541 | 0        | -2.85496 | 1.964672 | 4.819637 | 0.440775 | 0.463743 | 0.356904 |
| RP11-495K9.7__linc  | 0        | 0        | 0        | 0        | 0.041554 | 0        | 0.051386 | 0.129057 | 0        | #NUM!    | #NUM!    | -2.1185  | 0.42265  | 0.25003  | 0.209784 |
| RP11-495K9.9__linc  | 0        | 0        | 0        | 0        | 1.14915  | 0.553447 | 0        | 0        | 0.095386 | #NUM!    | #NUM!    | 4.157814 | 0.229314 | 0.42265  | 0.249908 |
| RP11-495P10.2__lin  | 15.8191  | 13.0046  | 6.59665  | 51.493   | 25.5815  | 34.4764  | 13.0798  | 7.06097  | 22.5153  | -1.65505 | -0.26817 | 1.386879 | 0.064615 | 0.757281 | 0.10192  |
| RP11-495P10.3__lin  | 0.832338 | 0        | 0.53582  | 2.17618  | 2.4472   | 4.25666  | 0.115076 | 0.128311 | 1.52269  | -2.69833 | -0.36831 | 2.330018 | 0.067678 | 0.812721 | 0.006763 |
| RP11-495P10.8__lin  | 0        | 0.018562 | 0.079649 | 0.104496 | 0.277439 | 2.80894  | 0.179183 | 0.017198 | 0.051391 | -5.02193 | -1.33506 | 3.686865 | 0.349178 | 0.52399  | 0.386749 |
| RP11-496B10.3__lin  | 9.0598   | 8.85311  | 9.87743  | 4.50777  | 3.63104  | 31.4073  | 8.06874  | 12.8724  | 7.94465  | -0.50895 | -0.05578 | 0.453176 | 0.699907 | 0.861565 | 0.758327 |
| RP11-496D24.2__lin  | 0.561274 | 0.361221 | 0.244424 | 0.397486 | 19.7665  | 41.8621  | 0.369548 | 0.050935 | 0.118406 | -5.7321  | 1.114644 | 6.846743 | 0.234816 | 0.060389 | 0.231033 |
| RP11-496I2.2__lincF | 0        | 0.279733 | 0.010889 | 0.1181   | 0.175542 | 0.022929 | 0.034229 | 0        | 0.035543 | -0.12339 | 2.058441 | 2.181827 | 0.905149 | 0.549274 | 0.269123 |
| RP11-496I9.1__antis | 0        | 0        | 0        | 0        | 3.05295  | 0.599187 | 0.276502 | 0        | 0        | #NUM!    | #NUM!    | 3.723379 | 0.322266 | 0.42265  | 0.376036 |
| RP11-496N12.6__se   | 0.3816   | 0        | 0.969039 | 0.214421 | 4.83325  | 20.0086  | 0.690145 | 0        | 0        | -4.21346 | 0.968671 | 5.182128 | 0.303281 | 0.625028 | 0.316752 |
| RP11-497E19.1__lin  | 0.017419 | 0.041084 | 0.052297 | 0.138693 | 0.334724 | 2.38598  | 0.051198 | 0.076106 | 0.05685  | -4.6897  | -0.73297 | 3.956728 | 0.326215 | 0.133393 | 0.341364 |
| RP11-497G19.1__lin  | 0.038137 | 0        | 0.533148 | 0        | 12.4507  | 2.18353  | 0.223193 | 0.621266 | 0.493078 | -4.67899 | -1.2273  | 3.451696 | 0.353546 | 0.318845 | 0.357677 |
| RP11-497G19.3__lin  | 0        | 0        | 0        | 0        | 0        | 2.44273  | 0.23655  | 0        | 0        | #NUM!    | #NUM!    | 3.368277 | 0.42265  | 0.42265  | 0.480987 |
| RP11-497K21.1__an   | 0        | 0.104655 | 0        | 0        | 1.96544  | 16.036   | 0        | 0        | 0        | -7.42633 | #DIV/0!  | #DIV/0!  | 0.35995  | 0.42265  | 0.356701 |
| RP11-498B4.5__anti  | 0        | 0        | 0        | 5.0508   | 0        | 0        | 0        | 0        | 0        | #NUM!    | #DIV/0!  | #DIV/0!  | 0.42265  | #DIV/0!  | 0.42265  |
| RP11-498C9.15__lin  | 1.42065  | 2.38935  | 2.22672  | 4.08456  | 7.42011  | 5.44021  | 1.78729  | 9.47428  | 13.5475  | -1.48901 | -2.03903 | -0.55002 | 0.036577 | 0.188758 | 0.476506 |
| RP11-498J9.2__anti  | 0        | 0        | 0        | 0        | 0        | 3.52107  | 0        | 0        | 0        | #NUM!    | #DIV/0!  | #DIV/0!  | 0.42265  | #DIV/0!  | 0.42265  |
| RP11-498M15.1__lin  | 0        | 0        | 0.514634 | 27.9566  | 0        | 0.286112 | 0.498771 | 0        | 0.683185 | -5.77819 | -1.19956 | 4.57863  | 0.427388 | 0.2682   | 0.431058 |

|                     |          |          |          |          |          |          |          |          |          |          |          |          |          |          |          |
|---------------------|----------|----------|----------|----------|----------|----------|----------|----------|----------|----------|----------|----------|----------|----------|----------|
| RP11-499E18.1__lin  | 0        | 0        | 0        | 0        | 3.01238  | 7.22325  | 0        | 0        | 0        | #NUM!    | #DIV/0!  | #DIV/0!  | 0.244905 | #DIV/0!  | 0.244905 |
| RP11-499F3.2__linc  | 0.975816 | 2.42438  | 1.00706  | 1.58609  | 11.181   | 105.531  | 1.01955  | 4.37274  | 0.083379 | -4.7464  | -0.31315 | 4.433248 | 0.373117 | 0.71398  | 0.383563 |
| RP11-499P20.2__an   | 2.1708   | 1.48737  | 1.49057  | 1.56785  | 2.71869  | 58.6476  | 1.513    | 1.94774  | 4.87865  | -3.61155 | -0.69572 | 2.915829 | 0.41647  | 0.470945 | 0.413843 |
| RP11-49G10.3__ant   | 0        | 0        | 0        | 0        | 9.36668  | 2.45251  | 0        | 0        | 0        | #NUM!    | #DIV/0!  | #DIV/0!  | 0.295238 | #DIV/0!  | 0.295238 |
| RP11-49I11.1__antis | 1.6054   | 0        | 1.78441  | 0        | 1.33024  | 3.21703  | 0.719101 | 1.13673  | 0.465515 | -0.4238  | 0.546243 | 0.970039 | 0.735832 | 0.684261 | 0.549155 |
| RP11-49L2.1__antis  | 0        | 0        | 0        | 0        | 0        | 0        | 0        | 0        | 0        | #DIV/0!  | #DIV/0!  | #DIV/0!  | #DIV/0!  | #DIV/0!  | #DIV/0!  |
| RP11-4F22.2__antis  | 3.20749  | 0        | 0.127901 | 0        | 0.216711 | 26.3811  | 96.0415  | 0.062063 | 0.030911 | -2.99538 | -4.84913 | -1.85375 | 0.492215 | 0.422867 | 0.59688  |
| RP11-4N23.1__proc   | 0.945967 | 1.06483  | 1.47059  | 2.15928  | 1.91133  | 7.22325  | 5.63629  | 0.753373 | 2.22907  | -1.6978  | -1.30781 | 0.389991 | 0.240631 | 0.377071 | 0.75067  |
| RP11-4O3.2__lincR   | 0        | 0        | 0.033119 | 0.073301 | 2.05751  | 0.07396  | 0        | 0        | 0.012011 | -6.05685 | 1.463293 | 7.520141 | 0.391127 | 0.42265  | 0.385366 |
| RP11-500G22.2__an   | 0        | 0.143493 | 0.243183 | 0.888277 | 10.1421  | 5.03301  | 0.401343 | 0        | 0.032988 | -5.37651 | -0.16767 | 5.208837 | 0.186227 | 0.942105 | 0.202743 |
| RP11-500M8.4__ser   | 0        | 0        | 0        | 0        | 1.4636   | 0        | 0        | 0        | 2.46883  | #NUM!    | #NUM!    | -0.75431 | 0.42265  | 0.42265  | 0.797785 |
| RP11-501E14.1__lin  | 0        | 0        | 0.072945 | 1.46375  | 2.93841  | 1.7232   | 0        | 0        | 0.15001  | -6.39185 | -1.04018 | 5.351664 | 0.04896  | 0.42265  | 0.05231  |
| RP11-501O2.1__linc  | 0        | 0        | 0        | 0        | 0.25071  | 0        | 0        | 0        | 0        | #NUM!    | #DIV/0!  | #DIV/0!  | 0.42265  | #DIV/0!  | 0.42265  |
| RP11-501O2.5__linc  | 0        | 0        | 0        | 0        | 2.17336  | 86.9931  | 0.15221  | 1.10996  | 0        | #NUM!    | #NUM!    | 6.142523 | 0.40841  | 0.349564 | 0.416647 |
| RP11-502M1.2__linc  | 0        | 0        | 0        | 0        | 0.023374 | 3.7663   | 0        | 0        | 21.4882  | #NUM!    | #NUM!    | -2.5034  | 0.419078 | 0.42265  | 0.423412 |
| RP11-503D12.1__lin  | 0        | 0        | 0        | 0        | 1.27611  | 0        | 0.441103 | 0        | 0        | #NUM!    | #NUM!    | 1.532565 | 0.42265  | 0.42265  | 0.642947 |
| RP11-503L23.1__lin  | 0        | 0        | 0        | 0        | 1.31844  | 0        | 0        | 0        | 0        | #NUM!    | #DIV/0!  | #DIV/0!  | 0.42265  | #DIV/0!  | 0.42265  |
| RP11-504P24.8__lin  | 0.55809  | 0.474668 | 2.70367  | 11.9005  | 4.62152  | 1.99239  | 0.928041 | 3.6185   | 1.21127  | -2.30892 | -0.62386 | 1.685056 | 0.294732 | 0.666528 | 0.333232 |
| RP11-506H20.1__an   | 16.3032  | 6.6095   | 8.52916  | 6.39293  | 12.8644  | 105.531  | 6.27744  | 10.3095  | 8.28081  | -1.98872 | 0.338411 | 2.327135 | 0.448417 | 0.644929 | 0.407001 |
| RP11-506N2.1__linc  | 0        | 0.071825 | 1.15802  | 0        | 53.8488  | 10.9337  | 0.178473 | 0        | 0.066048 | -5.71906 | 2.330447 | 8.049503 | 0.328699 | 0.486939 | 0.321723 |
| RP11-506O24.1__an   | 0.015351 | 0.018102 | 0.061463 | 0        | 6.1282   | 3.09904  | 0.187244 | 0        | 0.050124 | -6.60311 | -1.32241 | 5.2807   | 0.227297 | 0.525185 | 0.241995 |
| RP11-506O24.2__se   | 0.081343 | 0.383734 | 0.203461 | 0.269611 | 0.1518   | 0.446388 | 0.23894  | 0.355205 | 0.176874 | -0.37635 | -0.20576 | 0.170595 | 0.701213 | 0.635557 | 0.835196 |
| RP11-507B12.1__lin  | 0        | 0.106276 | 1.23257  | 0        | 6.66372  | 54.488   | 0.086826 | 0        | 0        | -5.51333 | 3.946714 | 9.460045 | 0.35642  | 0.417141 | 0.357747 |
| RP11-507B12.2__lin  | 0        | 0        | 5.24179  | 0        | 330.24   | 211.062  | 0.575103 | 0        | 0        | -6.69023 | 3.188167 | 9.878398 | 0.204646 | 0.48906  | 0.203449 |
| RP11-508N22.8__pr   | 0        | 0.062599 | 0.124983 | 0.084729 | 2.10063  | 0.183203 | 0.072924 | 0.046452 | 0        | -3.65842 | 0.652005 | 4.310427 | 0.382938 | 0.729544 | 0.37035  |
| RP11-508O18.1__lin  | 0        | 0        | 0        | 0.060387 | 0.291384 | 6.62139  | 0.08922  | 0        | 0.049532 | #NUM!    | #NUM!    | 5.651235 | 0.39259  | 0.214986 | 0.400179 |
| RP11-50C13.1__anti  | 2.87514  | 1.74717  | 2.3932   | 5.64925  | 3.9462   | 29.2066  | 1.91417  | 2.31839  | 1.48234  | -2.46751 | 0.29582  | 2.763333 | 0.321455 | 0.479267 | 0.318291 |
| RP11-50C13.2__sen   | 0.069242 | 0        | 0.225217 | 0        | 13.2645  | 3.58627  | 0.067842 | 0        | 0.037666 | -5.8386  | 1.48071  | 7.319313 | 0.301456 | 0.418356 | 0.295916 |
| RP11-50D9.3__antis  | 0.276102 | 1.72806  | 0.357271 | 0.320746 | 1.81594  | 2.89248  | 0.529674 | 0        | 1.53346  | -1.09066 | 0.194825 | 1.285482 | 0.392928 | 0.91821  | 0.248194 |
| RP11-50E11.3__anti  | 1.09709  | 1.02767  | 1.73711  | 0.286061 | 35.3643  | 2.75449  | 2.6636   | 1.85996  | 0.994656 | -3.31392 | -0.5149  | 2.799015 | 0.419597 | 0.502706 | 0.43549  |
| RP11-510C10.2__an   | 0        | 0.015992 | 0.461289 | 0        | 6.53325  | 0.597203 | 0.207548 | 0        | 0.280571 | -3.90108 | -0.03239 | 3.868689 | 0.410738 | 0.977301 | 0.413993 |
| RP11-510C10.4__lin  | 0        | 0        | 0        | 0.087668 | 0.235025 | 67.1655  | 0.043172 | 0        | 0        | #NUM!    | #NUM!    | 10.61031 | 0.41988  | 0.42265  | 0.420251 |
| RP11-510D19.1__lin  | 0        | 0        | 0.043455 | 0        | 1.2471   | 0.114381 | 0        | 0        | 0        | -4.9695  | #DIV/0!  | #DIV/0!  | 0.390799 | 0.42265  | 0.372331 |
| RP11-510J16.5__an   | 8.1273   | 1.41673  | 3.26948  | 13.6718  | 6.84311  | 104.392  | 4.35384  | 7.6064   | 0.446963 | -3.28512 | 0.046488 | 3.331603 | 0.361888 | 0.969845 | 0.377646 |
| RP11-510M2.2__ant   | 0.063248 | 2.15126  | 0.222929 | 0.126185 | 8.31322  | 0.394602 | 2.45846  | 1.55184  | 0.787721 | -1.8577  | -0.97707 | 0.880629 | 0.400931 | 0.461917 | 0.674698 |

|                     |          |          |          |          |          |          |          |          |          |          |          |          |          |          |          |
|---------------------|----------|----------|----------|----------|----------|----------|----------|----------|----------|----------|----------|----------|----------|----------|----------|
| RP11-510M2.4__pse   | 0        | 0        | 0.338649 | 0        | 0.937256 | 11.0783  | 0        | 0.244118 | 0        | -5.14897 | 0.472212 | 5.621181 | 0.374641 | 0.869264 | 0.387724 |
| RP11-510M2.6__ant   | 0        | 0        | 0        | 0        | 2.28439  | 87.1176  | 0.523195 | 0        | 0        | #NUM!    | #NUM!    | 7.416814 | 0.407714 | 0.42265  | 0.411191 |
| RP11-511B23.2__an   | 0.336722 | 0        | 1.50168  | 19.9986  | 15.2586  | 20.9745  | 4.81874  | 1.22988  | 2.50002  | -4.93486 | -2.21724 | 2.717617 | 0.006225 | 0.185025 | 0.006952 |
| RP11-511I2.2__antis | 0.990545 | 3.8999   | 1.51276  | 1.75609  | 6.99177  | 4.75297  | 1.14499  | 1.88855  | 3.77293  | -1.07618 | -0.08811 | 0.988069 | 0.098121 | 0.923147 | 0.261318 |
| RP11-512N21.3__an   | 0        | 0        | 0.930648 | 2.99223  | 3.62374  | 0        | 0.467629 | 0        | 0        | -2.82965 | 0.992871 | 3.822516 | 0.314838 | 0.743335 | 0.196246 |
| RP11-513G11.2__lin  | 0.068647 | 0.141671 | 0.137405 | 0.136659 | 0.27485  | 18.3927  | 0.050446 | 0        | 0.11203  | -5.75698 | 1.097714 | 6.85469  | 0.416306 | 0.262762 | 0.41132  |
| RP11-513G11.4__lin  | 0.192485 | 0.126722 | 0.414846 | 0.251796 | 4.83083  | 15.2483  | 0.506014 | 0        | 0.219203 | -4.79165 | 0.017471 | 4.809119 | 0.272937 | 0.986942 | 0.283061 |
| RP11-513N24.1__lin  | 0.011041 | 0        | 0.033171 | 0.04405  | 0.094535 | 10.3981  | 0.086662 | 0.08453  | 0.108268 | -7.89676 | -2.66012 | 5.236637 | 0.415573 | 0.00152  | 0.424484 |
| RP11-514D23.1__lin  | 0.029071 | 0.034282 | 0.207143 | 0        | 0.372846 | 86.9931  | 0.156751 | 0.12709  | 0        | -8.33532 | -0.06948 | 8.265844 | 0.420595 | 0.970415 | 0.422062 |
| RP11-514F8.2__linc  | 0        | 0        | 0        | 0        | 1.90548  | 1.15065  | 0.94567  | 0        | 0        | #NUM!    | #NUM!    | 1.692297 | 0.207324 | 0.42265  | 0.496186 |
| RP11-515O17.2__ar   | 0.122464 | 0        | 0.332663 | 0.278595 | 0.168091 | 3.28334  | 0.903219 | 0.095548 | 0.342592 | -3.03484 | -1.55935 | 1.47549  | 0.361138 | 0.349557 | 0.541406 |
| RP11-515O17.3__lin  | 0        | 0.040678 | 0.051781 | 0.022888 | 0.405092 | 0        | 0.101388 | 0        | 0.112582 | -2.21067 | -1.21053 | 1.000136 | 0.474726 | 0.438869 | 0.711116 |
| RP11-516C1.1__anti  | 0        | 0        | 0.634978 | 0        | 3.52162  | 11.0808  | 0        | 0        | 0        | -4.52336 | #DIV/0!  | #DIV/0!  | 0.268461 | 0.42265  | 0.274899 |
| RP11-516J2.1__lincI | 0.140103 | 0.104334 | 0.088642 | 2.09907  | 21.5028  | 4.66183  | 0.789831 | 0.040352 | 0.032163 | -6.40694 | -1.3724  | 5.034541 | 0.265984 | 0.533698 | 0.280741 |
| RP11-517C16.2__an   | 1.68779  | 1.24613  | 0        | 2.75294  | 1.45285  | 181.735  | 0        | 0        | 0.947495 | -5.98587 | 1.630639 | 7.616509 | 0.41862  | 0.501798 | 0.409306 |
| RP11-517O13.1__ar   | 8.81789  | 7.36903  | 8.42581  | 13.0318  | 7.48189  | 59.3576  | 5.81234  | 0        | 0        | -1.69827 | 2.082214 | 3.780486 | 0.375737 | 0.063475 | 0.290457 |
| RP11-518L10.5__an   | 1.93896  | 4.00315  | 1.1111   | 8.29244  | 2.56311  | 34.6728  | 1.81273  | 0.94131  | 3.01158  | -2.69041 | 0.290804 | 2.981218 | 0.350253 | 0.793841 | 0.290533 |
| RP11-519G16.3__ar   | 2.71859  | 118.347  | 8.04319  | 7.05649  | 22.2818  | 284.234  | 1.00361  | 13.7112  | 24.0325  | -1.28021 | 1.736419 | 3.01663  | 0.635839 | 0.507197 | 0.390697 |
| RP11-519G16.5__ar   | 12.0724  | 7.04667  | 19.6653  | 11.7543  | 13.5832  | 24.3389  | 4.49957  | 30.1365  | 11.4557  | -0.35709 | -0.24903 | 0.108051 | 0.218018 | 0.835515 | 0.906755 |
| RP11-519M16.1__lin  | 0        | 0.018102 | 0.900488 | 0        | 12.4507  | 1.84054  | 0        | 0        | 0.050124 | -3.95957 | 4.195839 | 8.155405 | 0.380763 | 0.410493 | 0.34635  |
| RP11-51M24.1__linc  | 0        | 0        | 0        | 0        | 1.17307  | 1.73811  | 0        | 0        | 0        | #NUM!    | #DIV/0!  | #DIV/0!  | 0.198462 | #DIV/0!  | 0.198462 |
| RP11-51O6.1__pseu   | 230.043  | 119.037  | 98.4593  | 81.588   | 42.8813  | 56.1402  | 96.71    | 127.918  | 97.7836  | 1.309141 | 0.473111 | -0.83603 | 0.104688 | 0.459385 | 0.146177 |
| RP11-51P8.1__lincR  | 0        | 0        | 0        | 0        | 0.425317 | 0.042227 | 0.087145 | 0        | 0        | #NUM!    | #NUM!    | 2.423604 | 0.368434 | 0.42265  | 0.49651  |
| RP11-520A21.1__lin  | 0        | 0.062618 | 0        | 0        | 0        | 0        | 1.29149  | 0        | 0        | #DIV/0!  | -4.36632 | #NUM!    | 0.42265  | 0.451287 | 0.42265  |
| RP11-520D19.1__lin  | 0        | 0        | 0        | 0        | 0        | 0        | 0.06613  | 0        | 0        | #DIV/0!  | #NUM!    | #NUM!    | #DIV/0!  | 0.42265  | 0.42265  |
| RP11-520D19.2__lin  | 0        | 0.075706 | 0.192415 | 0        | 7.68692  | 18.8331  | 0.156704 | 0        | 0        | -6.62806 | 0.774841 | 7.402896 | 0.247242 | 0.75206  | 0.251753 |
| RP11-521D12.1__lin  | 0        | 0        | 0.799915 | 0        | 1.61152  | 2.68789  | 0        | 0        | 0.08782  | -2.42622 | 3.187225 | 5.613445 | 0.186039 | 0.42265  | 0.205107 |
| RP11-521D12.2__lin  | 0        | 0        | 1.23214  | 0        | 3.96676  | 13.181   | 1.04914  | 0        | 0.160107 | -3.79878 | 0.027057 | 3.825839 | 0.270149 | 0.991188 | 0.325956 |
| RP11-521D12.5__lin  | 0.030973 | 0        | 0.558064 | 3.57045  | 2.96584  | 1.33153  | 0.748498 | 0        | 0.483108 | -3.73953 | -1.06411 | 2.675423 | 0.102458 | 0.485761 | 0.083577 |
| RP11-521E5.1__linc  | 0        | 0        | 0.057253 | 0        | 0.120749 | 6.52091  | 0        | 0        | 0        | -6.85805 | #DIV/0!  | #DIV/0!  | 0.411967 | 0.42265  | 0.41206  |
| RP11-521O16.2__lin  | 0        | 0        | 0.151902 | 0        | 1.65038  | 8.02574  | 0.350018 | 0.069055 | 0.069988 | -5.99322 | -1.68687 | 4.306343 | 0.316488 | 0.468215 | 0.346694 |
| RP11-522B15.3__lin  | 0.054851 | 0.064697 | 0.87719  | 0.036276 | 4.19506  | 21.9652  | 0.134063 | 0.014103 | 0.070258 | -4.71602 | 2.190083 | 6.906101 | 0.322941 | 0.446865 | 0.327144 |
| RP11-522D2.1__linc  | 0        | 0        | 0.371193 | 0.42775  | 0.123224 | 1.24383  | 0.177678 | 0.05782  | 0        | -2.27358 | 0.656453 | 2.930038 | 0.160976 | 0.811479 | 0.291355 |
| RP11-522N14.2__lin  | 0.052885 | 0.062363 | 0.384835 | 0.245973 | 1.27879  | 1.36311  | 0.09375  | 0.014453 | 0.014398 | -2.52977 | 2.028193 | 4.557963 | 0.123533 | 0.419992 | 0.139302 |
| RP11-523L20.1__lin  | 0.048376 | 0        | 0        | 0        | 0.612404 | 0        | 0        | 0        | 0        | -3.66211 | #DIV/0!  | #DIV/0!  | 0.469908 | 0.42265  | 0.42265  |





|                     |          |          |          |          |          |          |          |          |          |          |          |          |          |          |          |
|---------------------|----------|----------|----------|----------|----------|----------|----------|----------|----------|----------|----------|----------|----------|----------|----------|
| RP11-53B2.2__sens   | 0.555617 | 2.1884   | 1.55836  | 3.66369  | 0.893781 | 0.941913 | 0.58026  | 0.803372 | 2.94467  | -0.35414 | -0.00867 | 0.345469 | 0.798097 | 0.992363 | 0.816164 |
| RP11-53B2.3__antis  | 0.552192 | 0.41497  | 0.413406 | 7.9878   | 1.57052  | 46.0635  | 0.137074 | 0.737363 | 0.655258 | -5.33232 | -0.14798 | 5.184335 | 0.323129 | 0.851189 | 0.322402 |
| RP11-53I6.2__proce  | 6.04034  | 5.75305  | 7.72312  | 23.0139  | 22.2062  | 43.0083  | 3.05674  | 8.67917  | 4.74185  | -2.17655 | 0.244175 | 2.420723 | 0.065948 | 0.658235 | 0.084084 |
| RP11-53L24.1__lincl | 0        | 0        | 0        | 0        | 9.80091  | 6.22869  | 0.377973 | 0        | 0        | #NUM!    | #NUM!    | 5.406311 | 0.203053 | 0.42265  | 0.222257 |
| RP11-53O19.1__ant   | 9.75176  | 10.5951  | 6.25149  | 6.80409  | 4.84867  | 22.6831  | 7.38306  | 8.09481  | 9.40578  | -0.36838 | 0.096139 | 0.464518 | 0.746973 | 0.788026 | 0.601098 |
| RP11-53O19.2__linc  | 0        | 3.63329  | 0.479459 | 2.13495  | 5.27698  | 43.2509  | 0.545275 | 0        | 0        | -3.62275 | 2.915047 | 6.5378   | 0.372887 | 0.4441   | 0.336354 |
| RP11-540D4.3__linc  | 0        | 0        | 0.247757 | 0        | 0        | 786.388  | 0.250169 | 0.089926 | 0        | -11.6321 | -0.45701 | 11.17509 | 0.42265  | 0.853296 | 0.422899 |
| RP11-540E16.2__lin  | 0        | 0        | 0.107675 | 0        | 0        | 0        | 0        | 0        | 0.115678 | #DIV/0!  | -0.10343 | #NUM!    | 0.42265  | 0.42265  | 0.42265  |
| RP11-540K16.1__lin  | 0        | 0        | 0.705212 | 53.5938  | 34.8636  | 8.95763  | 1.82085  | 0        | 0.304513 | -7.10994 | -1.59158 | 5.518363 | 0.133878 | 0.560225 | 0.126934 |
| RP11-540N6.1__linc  | 0        | 0        | 0        | 0        | 3.99559  | 6.33703  | 0        | 0        | 0.622921 | #NUM!    | #NUM!    | 4.052013 | 0.203693 | 0.42265  | 0.195999 |
| RP11-541F9.1__linc  | 0        | 0        | 0        | 0        | 6.84311  | 34.3314  | 0        | 0        | 0        | #NUM!    | #DIV/0!  | #DIV/0!  | 0.320928 | #DIV/0!  | 0.320928 |
| RP11-541F9.2__linc  | 0        | 0.233242 | 4.00159  | 0.693999 | 1.63787  | 8.52735  | 0.192783 | 0        | 0        | -1.35854 | 4.457255 | 5.815799 | 0.201425 | 0.418473 | 0.291964 |
| RP11-541G9.1__linc  | 0.012685 | 0        | 0.762861 | 0.042237 | 17.9124  | 147.888  | 0.09966  | 0        | 0.041505 | -7.74039 | 2.457836 | 10.19822 | 0.35699  | 0.495913 | 0.357622 |
| RP11-542B15.1__lin  | 0.435483 | 0.24718  | 0.327341 | 0.114231 | 7.15503  | 5.41348  | 0.151801 | 0.075217 | 0.074916 | -3.65043 | 1.742053 | 5.392487 | 0.214933 | 0.019304 | 0.193867 |
| RP11-542G1.1__linc  | 0        | 0        | 0        | 0        | 18.6223  | 18.3927  | 0        | 0        | 0        | #NUM!    | #DIV/0!  | #DIV/0!  | 0.183519 | #DIV/0!  | 0.183519 |
| RP11-543A18.1__lin  | 0.066606 | 0        | 0.132687 | 0.131939 | 5.3323   | 11.0889  | 0.688282 | 0        | 0        | -6.37607 | -1.78811 | 4.587961 | 0.225127 | 0.555879 | 0.256342 |
| RP11-543C4.1__linc  | 0.062387 | 0.110386 | 1.30799  | 6.06775  | 2.07946  | 2.10662  | 0.091415 | 0.203887 | 0.067659 | -2.79175 | 2.028454 | 4.820205 | 0.204871 | 0.481298 | 0.133097 |
| RP11-543E8.1__linc  | 0        | 0        | 0        | 0        | 7.52742  | 0        | 0        | 0        | 0        | #NUM!    | #DIV/0!  | #DIV/0!  | 0.42265  | #DIV/0!  | 0.42265  |
| RP11-543F8.2__linc  | 0        | 0        | 0        | 0        | 6.76171  | 6.00192  | 1.46561  | 0        | 0        | #NUM!    | #NUM!    | 3.122466 | 0.184946 | 0.42265  | 0.287833 |
| RP11-544M22.1__ar   | 0        | 0.076427 | 0.360707 | 0.477161 | 5.58837  | 281.274  | 1.08521  | 0        | 0.030122 | -9.36047 | -1.35133 | 8.00914  | 0.410455 | 0.655627 | 0.412543 |
| RP11-545A16.1__an   | 0        | 0        | 0.11543  | 0.094379 | 0.218396 | 0.331684 | 0.113118 | 0.058196 | 0.02899  | -2.48107 | -0.79517 | 1.685897 | 0.050004 | 0.681391 | 0.25235  |
| RP11-545A16.4__se   | 0.070675 | 0.125061 | 0        | 0        | 0        | 0.33498  | 0        | 0        | 0.076576 | -0.77516 | 1.35394  | 2.129103 | 0.779434 | 0.577377 | 0.42265  |
| RP11-545H22.1__lin  | 0        | 0        | 0        | 0        | 0        | 0        | 0        | 0        | 0        | #DIV/0!  | #DIV/0!  | #DIV/0!  | #DIV/0!  | #DIV/0!  | #DIV/0!  |
| RP11-545L5.1__lincl | 0        | 0        | 0        | 0        | 3.98171  | 15.8172  | 0        | 0        | 0        | #NUM!    | #DIV/0!  | #DIV/0!  | 0.299176 | #DIV/0!  | 0.299176 |
| RP11-545P7.4__anti  | 3.6379   | 1.55456  | 2.82704  | 1.18149  | 0        | 2.567    | 1.96797  | 5.04925  | 2.90568  | 1.097203 | -0.30725 | -1.40445 | 0.155119 | 0.716331 | 0.303933 |
| RP11-546J1.1__lincl | 0.631353 | 1.08832  | 0.707778 | 4.68369  | 40.6341  | 0        | 1.77935  | 1.10877  | 0.57684  | -4.22256 | -0.5134  | 3.709167 | 0.377181 | 0.481659 | 0.39036  |
| RP11-547C5.2__linc  | 0        | 0        | 0        | 0        | 2.28728  | 4.85181  | 0        | 0        | 0        | #NUM!    | #DIV/0!  | #DIV/0!  | 0.231579 | #DIV/0!  | 0.231579 |
| RP11-547D24.1__an   | 0.275045 | 0.202787 | 0.169861 | 0.348257 | 3.27574  | 20.9745  | 0.167811 | 0.118002 | 0.347973 | -5.24712 | 0.031314 | 5.278431 | 0.342478 | 0.964239 | 0.336962 |
| RP11-547D24.3__an   | 0        | 0        | 0.267483 | 0.176234 | 124.161  | 3.19914  | 0.130511 | 0        | 0        | -8.89725 | 1.035276 | 9.932522 | 0.408363 | 0.734293 | 0.407758 |
| RP11-548M13.1__lin  | 0        | 0        | 0        | 0        | 8.81394  | 13.3066  | 0.283804 | 0        | 0        | #NUM!    | #NUM!    | 6.284348 | 0.19984  | 0.42265  | 0.21023  |
| RP11-549B18.1__an   | 0.272381 | 0.481914 | 0.435741 | 0        | 0.26072  | 7.82739  | 0.213044 | 0.475128 | 0.236535 | -2.7648  | 0.363937 | 3.128734 | 0.461808 | 0.263401 | 0.455593 |
| RP11-54A4.2__antis  | 0        | 0        | 1.47353  | 2.8737   | 3.71801  | 6.07427  | 0        | 0        | 0        | -3.10361 | #DIV/0!  | #DIV/0!  | 0.017396 | 0.42265  | 0.047793 |
| RP11-54A9.1__lincR  | 0        | 0        | 0        | 2.36479  | 3.68794  | 78.8654  | 0        | 0.026387 | 0        | #NUM!    | #NUM!    | 11.65202 | 0.379296 | 0.42265  | 0.37948  |
| RP11-54O7.11__ant   | 9.23273  | 1.82634  | 34.9959  | 0.909962 | 2.24771  | 10.438   | 1.45284  | 21.9685  | 16.1247  | 1.760209 | 0.219824 | -1.54039 | 0.277362 | 0.868955 | 0.27027  |
| RP11-54O7.16__linc  | 0.192916 | 0.163827 | 0.384396 | 4.80025  | 0.944838 | 0.861655 | 0.283595 | 0.200871 | 0.134941 | -3.15612 | 0.258856 | 3.41498  | 0.279063 | 0.737751 | 0.254173 |

|                     |          |          |          |          |          |          |          |          |          |          |          |          |          |          |          |
|---------------------|----------|----------|----------|----------|----------|----------|----------|----------|----------|----------|----------|----------|----------|----------|----------|
| RP11-54O7.17__linc  | 0.687019 | 0.608584 | 1.34208  | 0.288783 | 1.48576  | 5.01609  | 0.133272 | 0.850475 | 1.3746   | -1.36427 | 0.161495 | 1.52577  | 0.368727 | 0.733496 | 0.308338 |
| RP11-54O7.1__lincR  | 0.22897  | 0.05679  | 0.154355 | 2.33847  | 0.173971 | 0.351269 | 0.103985 | 0.031613 | 0.083984 | -2.70193 | 1.003125 | 3.705059 | 0.340564 | 0.125678 | 0.322994 |
| RP11-54O7.3__lincR  | 0.211529 | 0        | 1.14963  | 0.810998 | 24.0867  | 3.26252  | 0        | 0.195778 | 0.243701 | -4.37075 | 1.630969 | 6.00172  | 0.360289 | 0.440258 | 0.335759 |
| RP11-550F7.1__pse   | 5.64728  | 80.0647  | 53.901   | 97.1263  | 23.1569  | 19.1395  | 54.6071  | 46.9339  | 56.9514  | 0.001968 | -0.18298 | -0.18495 | 0.99903  | 0.815861 | 0.821466 |
| RP11-550I24.2__pro  | 1.5333   | 2.62049  | 1.83932  | 1.95474  | 14.0222  | 1096.74  | 13.1219  | 5.61196  | 0.836165 | -7.53657 | -1.70727 | 5.829297 | 0.416447 | 0.347349 | 0.424149 |
| RP11-550P17.5__an   | 0        | 0        | 0.970995 | 1.26217  | 14.7289  | 183.916  | 1.14019  | 0        | 0.064105 | -7.68565 | -0.31065 | 7.374997 | 0.374224 | 0.907545 | 0.378006 |
| RP11-551L14.1__ps   | 1.03015  | 1.50333  | 2.04403  | 20.6881  | 2.19069  | 189.602  | 0        | 1.54596  | 0.317243 | -5.53663 | 1.296778 | 6.833404 | 0.363512 | 0.2208   | 0.361388 |
| RP11-552D4.1__linc  | 0.067086 | 0        | 0.218298 | 0        | 2.65369  | 25.0809  | 0        | 0        | 0        | -6.60264 | #DIV/0!  | #DIV/0!  | 0.366187 | 0.278522 | 0.365107 |
| RP11-552F3.10__an   | 0        | 0        | 0        | 0        | 0        | 0        | 0        | 0        | 0        | #DIV/0!  | #DIV/0!  | #DIV/0!  | #DIV/0!  | #DIV/0!  | #DIV/0!  |
| RP11-553E24.2__lin  | 0        | 0        | 1.88867  | 0        | 2.86223  | 4.50384  | 0        | 0        | 0.069988 | -1.96352 | 4.754123 | 6.717648 | 0.184333 | 0.42265  | 0.201811 |
| RP11-553K8.2__linc  | 0        | 0        | 0        | 0        | 0        | 0        | 0        | 0        | 0        | #DIV/0!  | #DIV/0!  | #DIV/0!  | #DIV/0!  | #DIV/0!  | #DIV/0!  |
| RP11-553L6.2__anti  | 0.174586 | 0.136347 | 0.087604 | 0.361004 | 3.22332  | 6.94531  | 0.035079 | 0.42973  | 0.084566 | -4.7236  | -0.46308 | 4.26052  | 0.22247  | 0.73194  | 0.222898 |
| RP11-553N19.1__lin  | 0        | 0        | 0.132373 | 0        | 0        | 6.06947  | 0.128846 | 0        | 0        | -5.51889 | 0.038961 | 5.557851 | 0.42265  | 0.988977 | 0.435033 |
| RP11-553P9.2__linc  | 0        | 0        | 0.053226 | 0.498154 | 2.34193  | 0        | 0.051887 | 0        | 0        | -5.73767 | 0.03675  | 5.774417 | 0.328163 | 0.989602 | 0.324782 |
| RP11-553P9.3__linc  | 0        | 0        | 0.222548 | 0        | 0        | 0        | 0.362546 | 0        | 0        | #DIV/0!  | -0.70405 | #NUM!    | 0.42265  | 0.809997 | 0.42265  |
| RP11-554A11.4__se   | 0.171739 | 0.086811 | 0.22083  | 0.162412 | 0.870679 | 0.186964 | 0.192006 | 0.214093 | 0.133241 | -1.34771 | -0.17003 | 1.177679 | 0.45501  | 0.777849 | 0.404027 |
| RP11-554A11.6__an   | 0        | 0.048929 | 1.06148  | 0        | 22.2019  | 20.9382  | 1.00118  | 0.203794 | 0        | -5.27987 | -0.11791 | 5.161956 | 0.184698 | 0.962792 | 0.203218 |
| RP11-554A11.8__lin  | 0        | 0        | 0        | 0        | 2.64656  | 6.59778  | 0.907771 | 0        | 0        | #NUM!    | #NUM!    | 3.34817  | 0.249209 | 0.42265  | 0.328388 |
| RP11-554D13.1__lin  | 0.71119  | 0.829753 | 0        | 0        | 1.47049  | 2.7495   | 0.456832 | 0        | 0        | -1.45343 | 1.754078 | 3.207504 | 0.468722 | 0.278791 | 0.310554 |
| RP11-554D14.1__ps   | 0        | 0        | 0        | 0        | 0        | 0        | 0        | 0        | 0        | #DIV/0!  | #DIV/0!  | #DIV/0!  | #DIV/0!  | #DIV/0!  | #DIV/0!  |
| RP11-554D14.2__ps   | 0.05839  | 0        | 0.116411 | 0        | 0.122724 | 0.438249 | 0.113416 | 0.189819 | 0.251739 | -1.68222 | -1.66671 | 0.015511 | 0.361808 | 0.083636 | 0.984833 |
| RP11-554D14.6__lin  | 0.052431 | 0        | 0.052428 | 5.86019  | 2.17451  | 5.31079  | 0.146266 | 0.217563 | 0        | -6.99177 | -1.79482 | 5.196948 | 0.059805 | 0.383861 | 0.068089 |
| RP11-554E23.2__lin  | 0        | 0        | 0.282159 | 0        | 7.97268  | 0.119154 | 0.256254 | 0        | 0.427087 | -4.84189 | -1.2761  | 3.565789 | 0.434572 | 0.213234 | 0.464182 |
| RP11-554I8.1__lincF | 0.944664 | 0.185595 | 0        | 0        | 4.20756  | 0        | 0        | 0.593919 | 0        | -1.89633 | 0.928315 | 2.824646 | 0.569958 | 0.69911  | 0.42265  |
| RP11-554I8.2__lincF | 0        | 0        | 0        | 0        | 0        | 0        | 0        | 0        | 0        | #DIV/0!  | #DIV/0!  | #DIV/0!  | #DIV/0!  | #DIV/0!  | #DIV/0!  |
| RP11-554K11.2__lin  | 0.094256 | 0        | 1.07304  | 0        | 6.9443   | 169.98   | 0        | 0        | 0        | -7.24382 | #DIV/0!  | #DIV/0!  | 0.399742 | 0.374344 | 0.399564 |
| RP11-554L12.1__lin  | 0        | 0        | 0        | 0        | 0        | 43.8099  | 0        | 0        | 0        | #NUM!    | #DIV/0!  | #DIV/0!  | 0.42265  | #DIV/0!  | 0.42265  |
| RP11-556E13.1__an   | 0.871937 | 3.8999   | 0.78423  | 1.09686  | 170.785  | 360.244  | 0.79228  | 0.109728 | 0        | -6.58156 | 2.622852 | 9.204412 | 0.232886 | 0.305908 | 0.230609 |
| RP11-556I14.1__linc | 0.16945  | 0.004709 | 0.438533 | 0.195436 | 5.1281   | 17.0612  | 0.320323 | 0.248603 | 0.136166 | -5.19121 | -0.20265 | 4.98856  | 0.277345 | 0.871989 | 0.289419 |
| RP11-556I14.2__linc | 0        | 0        | 1.37875  | 0        | 152.22   | 265.443  | 0        | 0        | 0        | -8.24283 | #DIV/0!  | #DIV/0!  | 0.211468 | 0.42265  | 0.211946 |
| RP11-558A11.3__lin  | 0        | 0.084034 | 0        | 0        | 3.21608  | 0.99618  | 0.758472 | 0        | 0        | -5.64747 | -3.17405 | 2.473427 | 0.274815 | 0.489739 | 0.422218 |
| RP11-558F24.4__an   | 0.311342 | 0.163235 | 0.531999 | 0.136951 | 1.46095  | 4.49053  | 0.23638  | 0.263623 | 1.46807  | -2.59661 | -0.96733 | 1.629287 | 0.29631  | 0.412209 | 0.268596 |
| RP11-55L3.1__lincR  | 0        | 0        | 0        | 0        | 4.29302  | 2.63515  | 0        | 0        | 0        | #NUM!    | #DIV/0!  | #DIV/0!  | 0.205922 | #DIV/0!  | 0.205922 |
| RP11-560A15.3__lin  | 0        | 0        | 0.779861 | 0        | 1.43385  | 21.0896  | 0.675009 | 0        | 0        | -4.85207 | 0.20831  | 5.060377 | 0.383424 | 0.941308 | 0.403557 |
| RP11-560A15.4__lin  | 0        | 0.14141  | 0        | 0        | 0        | 0        | 0        | 0        | 0        | #DIV/0!  | #DIV/0!  | #DIV/0!  | 0.42265  | 0.42265  | #DIV/0!  |

|                     |          |          |          |          |          |          |          |          |          |          |          |          |          |          |          |
|---------------------|----------|----------|----------|----------|----------|----------|----------|----------|----------|----------|----------|----------|----------|----------|----------|
| RP11-560G2.1__ant   | 17.1164  | 1.40179  | 0.181537 | 0.210437 | 6.31487  | 398.421  | 0.162068 | 1.89666  | 0.137426 | -4.43664 | 3.089966 | 7.526608 | 0.440583 | 0.438241 | 0.416211 |
| RP11-561C5.4__pse   | 1.97836  | 1.39452  | 4.17631  | 5.52844  | 1.55583  | 3.62106  | 1.86254  | 2.62515  | 7.71403  | -0.50394 | -0.69269 | -0.18876 | 0.493392 | 0.283207 | 0.845662 |
| RP11-561C5.5__pse   | 0.455381 | 0        | 0.583268 | 0        | 4.19455  | 438.263  | 0.676208 | 0.140808 | 0.374751 | -8.73469 | -0.19839 | 8.536293 | 0.417744 | 0.73593  | 0.418222 |
| RP11-561I11.4__ant  | 0.215523 | 0.096785 | 0.904505 | 1.3789   | 2.86999  | 106.237  | 3.81118  | 0        | 0.02603  | -6.50461 | -1.65695 | 4.847661 | 0.401316 | 0.591408 | 0.420634 |
| RP11-561P12.5__lin  | 0        | 0        | 0.27685  | 0.274238 | 1.7133   | 9.71093  | 0.135241 | 0        | 0        | -5.40107 | 1.033572 | 6.434643 | 0.312546 | 0.734653 | 0.323047 |
| RP11-562L8.1__proc  | 0        | 0        | 0        | 0        | 2.60639  | 106.205  | 0        | 0        | 0        | #NUM!    | #DIV/0!  | #DIV/0!  | 0.408659 | #DIV/0!  | 0.408659 |
| RP11-563E2.2__anti  | 6.28095  | 1.98182  | 4.91079  | 26.8496  | 7.34661  | 3.65489  | 3.4603   | 7.1869   | 1.92492  | -1.52269 | 0.067417 | 1.590107 | 0.330906 | 0.94763  | 0.377718 |
| RP11-563J2.2__lincl | 3.71759  | 1.14505  | 1.8853   | 6.34874  | 5.65124  | 109.907  | 1.4896   | 21.2614  | 0.476641 | -4.17519 | -1.78332 | 2.391866 | 0.385219 | 0.531033 | 0.485087 |
| RP11-563M4.1__linc  | 0        | 0        | 0        | 0        | 3.37721  | 3.24755  | 0        | 0        | 1.89992  | #NUM!    | #NUM!    | 1.80193  | 0.18366  | 0.42265  | 0.249789 |
| RP11-563P16.1__lin  | 1.72423  | 48.6302  | 4.86185  | 3.68815  | 53.505   | 30.7991  | 0.1562   | 0        | 0        | -0.67228 | 8.465555 | 9.137838 | 0.284954 | 0.34989  | 0.179909 |
| RP11-565A3.1__linc  | 0        | 0        | 0        | 0        | 11.5101  | 4.88598  | 0        | 0        | 0        | #NUM!    | #DIV/0!  | #DIV/0!  | 0.242952 | #DIV/0!  | 0.242952 |
| RP11-565A3.2__linc  | 0.09893  | 0        | 0.992527 | 0        | 9.2223   | 86.9931  | 0.526264 | 0.34294  | 0.122892 | -6.46194 | 0.137704 | 6.599644 | 0.365042 | 0.944189 | 0.370426 |
| RP11-566F5.1__pse   | 27.5533  | 14.0556  | 16.9137  | 14.701   | 3.08663  | 4.66728  | 17.9679  | 22.6969  | 15.2605  | 1.381963 | 0.065493 | -1.31647 | 0.002125 | 0.884747 | 0.142167 |
| RP11-566K19.9__ps   | 0.004344 | 0.031761 | 0.244481 | 0.020752 | 7.39766  | 3.18068  | 0.154347 | 0.0155   | 0.047258 | -5.23936 | 0.370049 | 5.609407 | 0.248711 | 0.852405 | 0.252683 |
| RP11-567C20.3__an   | 0        | 0        | 0        | 0        | 2.41229  | 1.9747   | 0        | 0        | 0        | #NUM!    | #DIV/0!  | #DIV/0!  | 0.187535 | #DIV/0!  | 0.187535 |
| RP11-567G24.1__ps   | 63.1856  | 28.5548  | 251.436  | 43.099   | 117.049  | 7.77881  | 55.4298  | 44.4557  | 76.843   | 1.031118 | 0.957416 | -0.0737  | 0.610855 | 0.452388 | 0.949664 |
| RP11-567L7.6__lincl | 0        | 0.117545 | 0.403944 | 0.049687 | 13.8751  | 80.8629  | 0.988779 | 0.013624 | 0.067856 | -7.50592 | -1.03725 | 6.468668 | 0.33325  | 0.69811  | 0.339995 |
| RP11-567M16.1__pr   | 0        | 0.106932 | 0        | 0        | 43.9205  | 6.55815  | 0.176531 | 0.098459 | 0.14641  | -8.88284 | -1.9785  | 6.90434  | 0.343543 | 0.208902 | 0.347455 |
| RP11-567M16.3__lin  | 0.260689 | 0.39281  | 0.521939 | 0.19238  | 5.62158  | 10.137   | 0.127787 | 0.680635 | 0.536071 | -3.76237 | -0.19386 | 3.568509 | 0.220593 | 0.692433 | 0.219011 |
| RP11-567N4.2__linc  | 0.21051  | 0.024534 | 0.230714 | 23.0139  | 17.6388  | 288.191  | 0.209344 | 0        | 0        | -9.46361 | 1.153705 | 10.61731 | 0.344885 | 0.361943 | 0.344897 |
| RP11-568K15.1__ps   | 11.8805  | 0.768141 | 13.3681  | 109.605  | 1.71421  | 62.8203  | 172.492  | 47.5283  | 51.9994  | -2.74273 | -3.3862  | -0.64347 | 0.21921  | 0.172719 | 0.280611 |
| RP11-56B16.2__pse   | 1.05268  | 1.25083  | 0.577253 | 1.78741  | 1.20839  | 4.29022  | 0.724058 | 0        | 0        | -1.33868 | 1.992274 | 3.330954 | 0.328074 | 0.1208   | 0.17321  |
| RP11-56I23.1__lincF | 0        | 0        | 0        | 0        | 91.5996  | 5.32932  | 0        | 0        | 0        | #NUM!    | #DIV/0!  | #DIV/0!  | 0.390091 | #DIV/0!  | 0.390091 |
| RP11-56L13.1__lincl | 0        | 0.05113  | 0.04341  | 0.053185 | 0.337989 | 0.193145 | 0.111202 | 0        | 0.090799 | -2.62776 | -1.09537 | 1.532396 | 0.137697 | 0.527284 | 0.383223 |
| RP11-56L13.7__anti  | 0        | 0.021339 | 0.055474 | 0.06931  | 0        | 0        | 0        | 0        | 0        | 0.148286 | #DIV/0!  | #DIV/0!  | 0.952556 | 0.253861 | 0.42265  |
| RP11-570L15.2__an   | 0.174387 | 0        | 3.34557  | 10.1397  | 29.2622  | 11.9112  | 0        | 0        | 0        | -3.8657  | #DIV/0!  | #DIV/0!  | 0.139785 | 0.393379 | 0.107146 |
| RP11-571L19.7__an   | 17.2158  | 10.9213  | 12.2889  | 6.93004  | 3.64057  | 95.6924  | 8.99373  | 13.8404  | 15.6535  | -1.39428 | 0.070889 | 1.465173 | 0.549366 | 0.880323 | 0.515192 |
| RP11-571M6.7__ant   | 42.9547  | 29.3127  | 22.208   | 11.8266  | 12.2328  | 9.54527  | 7.79771  | 50.1917  | 28.4899  | 1.491277 | 0.127584 | -1.36369 | 0.067719 | 0.888406 | 0.283646 |
| RP11-572C15.5__lin  | 0        | 1.14163  | 2.28402  | 0        | 1.43705  | 30.3928  | 1.64052  | 0.048798 | 0.016202 | -3.21593 | 1.006165 | 4.222096 | 0.416614 | 0.669485 | 0.428872 |
| RP11-572C15.6__lin  | 4.74344  | 1.57406  | 0.963454 | 0.425605 | 2.33907  | 3.48394  | 0        | 1.11338  | 1.11809  | 0.220591 | 1.706133 | 1.485542 | 0.882159 | 0.388599 | 0.140452 |
| RP11-572C21.1__lin  | 0        | 0        | 1.05984  | 0        | 1.33547  | 1.59004  | 0.252606 | 0.033131 | 0        | -1.46484 | 1.891088 | 3.355929 | 0.250353 | 0.589985 | 0.264009 |
| RP11-572M11.4__ar   | 10.4746  | 6.78355  | 5.75832  | 7.90712  | 248.447  | 899.74   | 4.47526  | 6.84341  | 4.13288  | -5.65045 | 0.574915 | 6.225363 | 0.293595 | 0.297352 | 0.290072 |
| RP11-572P18.1__ps   | 288.647  | 1022.83  | 146.438  | 54.4386  | 208.332  | 62.4509  | 290.592  | 198.908  | 221.918  | 2.164412 | 1.035137 | -1.12927 | 0.232128 | 0.479087 | 0.217945 |
| RP11-573D15.2__lin  | 0.081684 | 0.242235 | 0.191869 | 0.223034 | 6.70357  | 11.6619  | 0.952818 | 0.052709 | 0.064543 | -5.17149 | -1.05286 | 4.118633 | 0.207452 | 0.644649 | 0.244583 |
| RP11-573D15.3__an   | 0        | 0        | 1.52078  | 0        | 136.332  | 10.8603  | 2.48484  | 0        | 0        | -6.59675 | -0.70834 | 5.888405 | 0.38454  | 0.808944 | 0.389217 |

|                    |          |          |          |          |          |          |          |          |          |          |          |          |          |          |          |
|--------------------|----------|----------|----------|----------|----------|----------|----------|----------|----------|----------|----------|----------|----------|----------|----------|
| RP11-573D15.8__an  | 128.556  | 0.125102 | 4.32319  | 0.141268 | 16.3593  | 78.1602  | 1.06549  | 0.2582   | 1.27402  | 0.490634 | 5.678089 | 5.187454 | 0.851441 | 0.409613 | 0.323409 |
| RP11-573D15.9__an  | 0        | 0        | 0        | 0        | 0        | 0        | 0        | 0        | 0        | #DIV/0!  | #DIV/0!  | #DIV/0!  | #DIV/0!  | #DIV/0!  | #DIV/0!  |
| RP11-574M7.2__pse  | 0        | 0        | 0        | 0        | 0.074838 | 1.9827   | 0        | 0        | 0        | #NUM!    | #DIV/0!  | #DIV/0!  | 0.401284 | #DIV/0!  | 0.401284 |
| RP11-575B7.3__linc | 4.59152  | 0.061107 | 0        | 0.682778 | 0        | 24.788   | 0        | 0        | 0        | -2.45273 | #DIV/0!  | #DIV/0!  | 0.521033 | 0.415018 | 0.406972 |
| RP11-575F12.1__lin | 0        | 0.029219 | 2.59435  | 5.94125  | 10.078   | 50.8279  | 0.161649 | 0.288241 | 3.00957  | -4.67126 | -0.39902 | 4.272247 | 0.252823 | 0.063624 | 0.255421 |
| RP11-576D8.4__linc | 0.042762 | 0.088242 | 0.753745 | 1.40433  | 3.20138  | 11.0354  | 0.814012 | 0.011693 | 0.069891 | -4.14393 | -0.01758 | 4.126351 | 0.21323  | 0.993941 | 0.255519 |
| RP11-576E20.1__lin | 0.017899 | 0        | 0.017912 | 0.118744 | 1.03457  | 0        | 0.017534 | 0        | 0.01947  | -5.00926 | -0.04732 | 4.961937 | 0.379402 | 0.569195 | 0.380103 |
| RP11-576I22.2__ant | 7.83097  | 4.58578  | 2.64132  | 5.55362  | 81.4017  | 37.7646  | 2.9721   | 4.3682   | 3.52971  | -3.05008 | 0.470184 | 3.520267 | 0.250692 | 0.510947 | 0.220618 |
| RP11-576M8.2__linc | 0        | 0        | 0        | 0        | 0        | 0        | 0        | 0        | 0        | #DIV/0!  | #DIV/0!  | #DIV/0!  | #DIV/0!  | #DIV/0!  | #DIV/0!  |
| RP11-577G20.2__lin | 0        | 0        | 0        | 0        | 0        | 0        | 0        | 0        | 0        | #DIV/0!  | #DIV/0!  | #DIV/0!  | #DIV/0!  | #DIV/0!  | #DIV/0!  |
| RP11-578F21.10__p  | 0.012391 | 0.014618 | 0.154711 | 0        | 0        | 0        | 0        | 0        | 0        | #DIV/0!  | #DIV/0!  | #DIV/0!  | 0.327003 | 0.327003 | #DIV/0!  |
| RP11-578F21.12__p  | 0.561501 | 0.875379 | 0.982511 | 3.59594  | 14.0222  | 10.2121  | 1.11284  | 0.520464 | 0.984317 | -3.52394 | -0.11361 | 3.410325 | 0.102542 | 0.825457 | 0.11999  |
| RP11-579D7.4__linc | 0.487141 | 0        | 0.563691 | 2.52659  | 2.67133  | 3.12892  | 1.05033  | 1.30373  | 0.647082 | -2.98624 | -1.51398 | 1.472258 | 0.006426 | 0.208494 | 0.037678 |
| RP11-579O24.3__se  | 0.044379 | 0        | 0        | 0        | 0        | 0.041898 | 0        | 0        | 0        | 0.082996 | #DIV/0!  | #DIV/0!  | 0.97653  | 0.42265  | 0.42265  |
| RP11-57A19.2__linc | 0.22702  | 0.028179 | 0.151947 | 0.047655 | 2.05583  | 0.404465 | 1.20205  | 0.039196 | 1.7355   | -2.62289 | -2.87012 | -0.24723 | 0.40868  | 0.202254 | 0.898928 |
| RP11-57A19.4__pse  | 15.2231  | 45.8472  | 25.7436  | 16.2142  | 23.1417  | 16.8029  | 14.7685  | 30.1676  | 47.4398  | 0.628414 | -0.08959 | -0.718   | 0.27531  | 0.880056 | 0.335463 |
| RP11-57G10.8__linc | 0.153595 | 0.135902 | 0.115054 | 0.202436 | 0.284644 | 3.132    | 0.262168 | 0.083544 | 0.291031 | -3.16123 | -0.65439 | 2.506839 | 0.385665 | 0.371516 | 0.395566 |
| RP11-57H12.2__sen  | 0        | 11.1126  | 1.88867  | 9.71639  | 3.14591  | 189.602  | 2.87746  | 0        | 0        | -3.96094 | 2.175785 | 6.136728 | 0.418569 | 0.49757  | 0.392724 |
| RP11-57H12.3__anti | 1.15702  | 0.17157  | 0.339936 | 5.7603   | 4.42308  | 22.0771  | 0.08325  | 0.225382 | 0.158483 | -4.27312 | 1.836724 | 6.109845 | 0.219255 | 0.363826 | 0.202877 |
| RP11-57H12.5__anti | 1.30718  | 9.23538  | 1.70812  | 2.99917  | 8.3839   | 4.24347  | 1.21074  | 11.2282  | 9.08951  | -0.35114 | -0.81338 | -0.46225 | 0.384143 | 0.29946  | 0.422153 |
| RP11-57H14.3__sen  | 0        | 0.853411 | 0        | 5.97399  | 52.1805  | 7.7354   | 0.793053 | 0        | 0.555718 | -6.27067 | -0.66033 | 5.61034  | 0.281353 | 0.778428 | 0.295949 |
| RP11-580I16.2__ant | 40.8285  | 25.5365  | 34.7423  | 19.3487  | 10.043   | 44.9238  | 12.9257  | 37.0586  | 44.2785  | 0.444152 | 0.101127 | -0.34303 | 0.454847 | 0.875178 | 0.585379 |
| RP11-582E3.2__linc | 0        | 0        | 1.27817  | 0        | 5.31683  | 11.4758  | 0        | 0        | 0        | -3.71568 | #DIV/0!  | #DIV/0!  | 0.221137 | 0.42265  | 0.233435 |
| RP11-584P21.2__lin | 2.5674   | 3.05807  | 0.583935 | 21.0961  | 6.30212  | 27.7382  | 1.48872  | 1.49623  | 1.44674  | -3.15048 | 0.486598 | 3.637077 | 0.144859 | 0.507745 | 0.116857 |
| RP11-586D19.1__lin | 0        | 0        | 0.081452 | 0.0552   | 1.74042  | 62.7932  | 0.183461 | 0        | 0.063294 | -9.63112 | -1.59906 | 8.032061 | 0.406347 | 0.482322 | 0.408041 |
| RP11-586L23.1__lin | 0        | 0        | 0.031246 | 0        | 1.54523  | 0.23752  | 0.061079 | 0.068114 | 0.033905 | -5.83429 | -2.38399 | 3.4503   | 0.351333 | 0.168284 | 0.373393 |
| RP11-587D21.4__se  | 1.87582  | 0        | 2.99631  | 7.25988  | 19.2939  | 53.1556  | 2.3445   | 0        | 0        | -4.03212 | 1.055272 | 5.087397 | 0.200029 | 0.518809 | 0.21309  |
| RP11-587P21.2__lin | 0        | 0        | 0.069991 | 0        | 0        | 0        | 0.068378 | 0        | 0.037955 | #DIV/0!  | -0.60334 | #NUM!    | 0.42265  | 0.722136 | 0.215002 |
| RP11-587P21.3__lin | 0        | 0        | 0        | 0.042526 | 0        | 52.045   | 0.094346 | 0        | 0        | #NUM!    | #NUM!    | 9.108765 | 0.422178 | 0.42265  | 0.423225 |
| RP11-588H23.3__an  | 0.774364 | 0        | 1.67805  | 0        | 6.71424  | 7.41346  | 0        | 0        | 0        | -2.52625 | #DIV/0!  | #DIV/0!  | 0.239563 | 0.233863 | 0.184502 |
| RP11-589B3.6__linc | 0        | 0        | 0.361249 | 0.079053 | 0.980324 | 0.630304 | 0.662467 | 0.327186 | 0        | -2.22569 | -1.45393 | 0.771756 | 0.247806 | 0.558865 | 0.62543  |
| RP11-589P10.7__an  | 41.2417  | 12.5664  | 18.0515  | 14.1784  | 12.0699  | 8.24658  | 6.65557  | 23.6815  | 15.8702  | 1.058799 | 0.637061 | -0.42174 | 0.250667 | 0.593051 | 0.571932 |
| RP11-58E21.3__linc | 0.960327 | 0.274776 | 0.635099 | 33.0882  | 8.18274  | 8.83533  | 0.715103 | 0.594414 | 0.578021 | -4.74373 | -0.01331 | 4.730414 | 0.183019 | 0.975401 | 0.187429 |
| RP11-58E21.4__linc | 0.117129 | 0        | 3.65287  | 2.91736  | 17.431   | 22.0771  | 0.114227 | 0.180179 | 0        | -3.49229 | 3.678685 | 7.170979 | 0.125388 | 0.451336 | 0.136133 |
| RP11-58E21.5__linc | 0.537517 | 0        | 1.19557  | 1.63536  | 2.69154  | 6.20309  | 0.360807 | 0        | 0.2549   | -2.60309 | 1.493028 | 4.096116 | 0.122827 | 0.325981 | 0.139512 |

|                     |          |          |          |          |          |          |          |          |          |          |          |          |          |          |          |
|---------------------|----------|----------|----------|----------|----------|----------|----------|----------|----------|----------|----------|----------|----------|----------|----------|
| RP11-58G13.1__ant   | 2.12925  | 2.05124  | 1.27257  | 217.357  | 1.1083   | 6.30801  | 1.85734  | 2.29089  | 0.688458 | -5.36526 | 0.173047 | 5.538307 | 0.411838 | 0.482326 | 0.410972 |
| RP11-593F23.1__an   | 0        | 0        | 4.52354  | 0        | 0.664114 | 15.984   | 0.130115 | 0        | 0.302742 | -1.87983 | 3.38549  | 5.265324 | 0.390216 | 0.440713 | 0.403544 |
| RP11-594C13.1__lin  | 0        | 6.42405  | 1.47762  | 0        | 14.05    | 95.6924  | 0.726172 | 0        | 0        | -3.79582 | 3.443774 | 7.239594 | 0.377952 | 0.375305 | 0.349257 |
| RP11-596D21.1__an   | 0        | 0        | 0        | 0        | 19.2967  | 66.4673  | 0.139813 | 0.96873  | 2.49046  | #NUM!    | #NUM!    | 4.574703 | 0.284574 | 0.223478 | 0.287188 |
| RP11-597A11.2__lin  | 0        | 0.02441  | 0.146677 | 0        | 0.174708 | 0        | 0.12834  | 0        | 0.018751 | -0.03021 | 0.218027 | 0.248242 | 0.990046 | 0.924228 | 0.92672  |
| RP11-597D13.7__ps   | 2.88225  | 3.75353  | 0.470382 | 7.82835  | 2.37467  | 4.28707  | 2.22664  | 2.07613  | 1.46414  | -1.02792 | 0.301272 | 1.329196 | 0.333663 | 0.624095 | 0.198025 |
| RP11-597D13.9__an   | 24.0145  | 28.0512  | 5.21947  | 6.97779  | 6.87749  | 53.1556  | 2.66386  | 0.702426 | 0        | -0.22623 | 4.088932 | 4.315166 | 0.898099 | 0.112757 | 0.315562 |
| RP11-598D14.1__lin  | 0        | 0        | 0.494472 | 0.629085 | 111.579  | 0        | 0        | 0        | 0        | -7.82607 | #DIV/0!  | #DIV/0!  | 0.421968 | 0.42265  | 0.419404 |
| RP11-598F7.1__linc  | 0        | 0.078035 | 0.187373 | 0.250942 | 0.994745 | 0.554107 | 0.520615 | 0        | 0.151319 | -2.76155 | -1.34011 | 1.42144  | 0.130414 | 0.555194 | 0.411537 |
| RP11-598F7.4__anti  | 0        | 0        | 0.30987  | 0        | 0        | 0        | 0.092565 | 0.198943 | 0        | #DIV/0!  | 0.08813  | #NUM!    | 0.42265  | 0.972079 | 0.23298  |
| RP11-598F7.6__linc  | 0        | 0        | 0        | 0.200719 | 5.49439  | 20.9694  | 0.549098 | 0        | 0.296573 | #NUM!    | #NUM!    | 4.97868  | 0.289851 | 0.217639 | 0.303217 |
| RP11-599B13.7__lin  | 2.61748  | 10.4291  | 9.67147  | 8.79112  | 4.98772  | 2.86093  | 23.3692  | 11.627   | 21.9611  | 0.449204 | -1.32604 | -1.77525 | 0.671477 | 0.181364 | 0.066226 |
| RP11-599J14.2__ps   | 0.597494 | 0        | 5.33889  | 2.73377  | 2.7954   | 23.0868  | 0.301229 | 0        | 1.74031  | -2.26916 | 1.539927 | 3.809091 | 0.276302 | 0.377224 | 0.291842 |
| RP11-59E19.1__linc  | 0.522696 | 0.741269 | 28.039   | 1.76095  | 0.066698 | 1.77433  | 1.21493  | 3.32715  | 0.033975 | 3.024186 | 2.678871 | -0.34532 | 0.435853 | 0.492544 | 0.849468 |
| RP11-59H7.3__sens   | 1.48734  | 2.527    | 1.93328  | 3.07953  | 3.81619  | 18.2332  | 2.83843  | 1.27188  | 1.71715  | -2.07896 | 0.029445 | 2.10841  | 0.325894 | 0.962636 | 0.333216 |
| RP11-59J16.1__lincf | 0.14158  | 0.042884 | 1.16726  | 0.132745 | 2.59772  | 14.8016  | 0        | 0.062472 | 0.242266 | -3.69712 | 2.149157 | 5.846281 | 0.32656  | 0.354171 | 0.327005 |
| RP11-5K23.5__antis  | 0        | 0        | 0.087218 | 0        | 0.091185 | 2.70134  | 0        | 0        | 0        | -5.0008  | #DIV/0!  | #DIV/0!  | 0.402874 | 0.42265  | 0.403501 |
| RP11-5P18.10__pse   | 0        | 0        | 1.39149  | 0        | 2.5575   | 15.2483  | 0        | 0        | 0        | -3.67764 | #DIV/0!  | #DIV/0!  | 0.32745  | 0.42265  | 0.335102 |
| RP11-5P22.3__lincR  | 0        | 0        | 0        | 0        | 1.04426  | 0        | 0.330758 | 0        | 0        | #NUM!    | #NUM!    | 1.658633 | 0.42265  | 0.42265  | 0.623933 |
| RP11-5P4.1__lincRN  | 0        | 0        | 0.130799 | 0        | 6.61316  | 0        | 0        | 0        | 0        | -5.65992 | #DIV/0!  | #DIV/0!  | 0.43418  | 0.42265  | 0.42265  |
| RP11-603J24.17__a   | 19.347   | 9.87234  | 12.4171  | 9.29038  | 3.00388  | 5.45853  | 8.49325  | 18.0928  | 15.9627  | 1.229801 | -0.03127 | -1.26107 | 0.016892 | 0.962563 | 0.222061 |
| RP11-603J24.4__an   | 14.4163  | 15.9654  | 12.61    | 6.44287  | 6.98254  | 4.89373  | 11.2825  | 18.7838  | 21.7603  | 1.230706 | -0.26963 | -1.50034 | 0.002202 | 0.49368  | 0.085164 |
| RP11-603J24.5__an   | 1.82358  | 0.782802 | 1.0768   | 1.92657  | 2.81032  | 1.90557  | 0.443128 | 1.52704  | 0.968771 | -0.85076 | 0.325657 | 1.176422 | 0.220835 | 0.726662 | 0.016321 |
| RP11-606D9.1__linc  | 0        | 0        | 0        | 0        | 0        | 27.9176  | 0        | 0        | 0        | #NUM!    | #DIV/0!  | #DIV/0!  | 0.42265  | #DIV/0!  | 0.42265  |
| RP11-608B3.1__linc  | 0        | 0        | 0        | 0        | 0.923059 | 0        | 0        | 0        | 0        | #NUM!    | #DIV/0!  | #DIV/0!  | 0.42265  | #DIV/0!  | 0.42265  |
| RP11-608O21.1__lin  | 0        | 0        | 3.00519  | 0        | 33.4227  | 248.682  | 0        | 0        | 0        | -6.55263 | #DIV/0!  | #DIV/0!  | 0.350092 | 0.42265  | 0.35089  |
| RP11-60A24.3__linc  | 1.45671  | 1.34304  | 1.28649  | 1.81231  | 110.778  | 56.3324  | 1.35328  | 1.78645  | 2.54289  | -5.36945 | -0.47578 | 4.893663 | 0.223114 | 0.310311 | 0.224581 |
| RP11-60A8.1__lincR  | 0        | 0        | 1.84249  | 0.106647 | 24.4269  | 35.5945  | 2.8377   | 0        | 1.56863  | -5.02831 | -1.25792 | 3.770389 | 0.192319 | 0.480781 | 0.233567 |
| RP11-60A8.2__lincR  | 0        | 0        | 0.17479  | 0        | 2.58349  | 0        | 0        | 0        | 0.931174 | -3.88563 | -2.41343 | 1.472199 | 0.462939 | 0.42265  | 0.652621 |
| RP11-60H5.1__lincR  | 0.009336 | 0.033026 | 0.13091  | 0.074535 | 1.86977  | 2.16286  | 0.653644 | 0.040856 | 0        | -4.56704 | -2.00294 | 2.564096 | 0.171033 | 0.542323 | 0.318485 |
| RP11-611E13.2__an   | 19.659   | 13.0973  | 11.6131  | 5.80569  | 127.411  | 1165.46  | 9.32545  | 25.0507  | 13.8774  | -4.87133 | -0.12107 | 4.750263 | 0.375485 | 0.859511 | 0.375561 |
| RP11-613C6.2__anti  | 7.66307  | 4.86489  | 5.16568  | 2.88902  | 3.22171  | 5.29533  | 4.28349  | 7.86303  | 9.92886  | 0.63343  | -0.31921 | -0.95264 | 0.281244 | 0.614649 | 0.081282 |
| RP11-613D13.5__an   | 6.75886  | 5.79632  | 5.15618  | 9.58537  | 5.2196   | 67.1655  | 8.05344  | 7.65347  | 1.76025  | -2.21043 | 0.02003  | 2.230459 | 0.402349 | 0.965455 | 0.431161 |
| RP11-613D13.8__lin  | 5.0228   | 1.05687  | 0        | 0        | 5.06763  | 0        | 0.749411 | 0        | 0        | 0.262682 | 3.020164 | 2.757482 | 0.909096 | 0.300925 | 0.513322 |
| RP11-614F17.2__lin  | 0        | 0        | 0        | 0.069929 | 0.109715 | 0        | 0.056974 | 0        | 0        | #NUM!    | #NUM!    | 1.656778 | 0.20282  | 0.42265  | 0.358927 |

|                     |          |          |          |          |          |          |          |          |          |          |          |          |          |          |          |
|---------------------|----------|----------|----------|----------|----------|----------|----------|----------|----------|----------|----------|----------|----------|----------|----------|
| RP11-615I2.1__antis | 0        | 0        | 0.221608 | 0.820096 | 17.5071  | 56.3324  | 0.581047 | 0        | 0.280333 | -8.39617 | -1.95864 | 6.437534 | 0.268907 | 0.36752  | 0.274434 |
| RP11-616L12.1__lin  | 0        | 0        | 0.248309 | 0        | 1.53903  | 2.46354  | 0        | 0        | 0        | -4.01072 | #DIV/0!  | #DIV/0!  | 0.196434 | 0.42265  | 0.20445  |
| RP11-617D20.1__an   | 18.8448  | 16.1441  | 16.0956  | 9.11205  | 19.2078  | 40.2585  | 12.0632  | 19.7777  | 18.1605  | -0.42487 | 0.030917 | 0.455785 | 0.614926 | 0.9215   | 0.519072 |
| RP11-617I14.1__linc | 0        | 0        | 0        | 0        | 2.71568  | 1.05052  | 0.59729  | 0        | 0.165024 | #NUM!    | #NUM!    | 2.304652 | 0.253237 | 0.289745 | 0.405693 |
| RP11-618G20.1__pr   | 4.01292  | 2.58225  | 2.2152   | 4.99716  | 7.91174  | 36.5986  | 1.24216  | 1.61691  | 1.40488  | -2.49037 | 1.047012 | 3.537385 | 0.324967 | 0.137673 | 0.273375 |
| RP11-619I22.1__ser  | 0        | 0.409892 | 0        | 0        | 0        | 0        | 1.90593  | 0        | 0        | #DIV/0!  | -2.21718 | #NUM!    | 0.42265  | 0.556946 | 0.42265  |
| RP11-61A14.1__anti  | 0.288612 | 0.340988 | 2.30478  | 2.55127  | 3.72062  | 4.37217  | 2.49541  | 1.99925  | 3.59847  | -1.85892 | -1.46364 | 0.395279 | 0.02438  | 0.022997 | 0.219959 |
| RP11-61A14.4__linc  | 0.060859 | 0.071762 | 0.111741 | 0.094449 | 0.162889 | 0.097254 | 0.1493   | 0.077666 | 0.09948  | -0.53714 | -0.41783 | 0.119313 | 0.35189  | 0.470378 | 0.839703 |
| RP11-61G19.1__linc  | 0        | 0        | 0.185409 | 0        | 2.49635  | 8.00528  | 0.269862 | 0        | 0        | -5.82376 | -0.54151 | 5.282248 | 0.274416 | 0.85108  | 0.295895 |
| RP11-61J19.3__lincI | 0        | 0        | 0.439557 | 0        | 0.15065  | 0.691154 | 0        | 0        | 1.09651  | -0.93743 | -1.3188  | -0.38136 | 0.208061 | 0.42265  | 0.659946 |
| RP11-61O1.1__lincR  | 0        | 0        | 7.15522  | 2.16565  | 10.6731  | 19.7429  | 1.81678  | 0        | 0        | -2.18699 | 1.977612 | 4.164604 | 0.118054 | 0.582493 | 0.208671 |
| RP11-620J15.2__lin  | 0.106993 | 0.058745 | 2.16385  | 0.463705 | 3.96303  | 48.7524  | 1.35873  | 0.067383 | 0.089474 | -4.51271 | 0.620198 | 5.132911 | 0.372065 | 0.806025 | 0.389107 |
| RP11-622J8.1__lincI | 0        | 0        | 0        | 0        | 2.01005  | 2.65704  | 0        | 0        | 0        | #NUM!    | #DIV/0!  | #DIV/0!  | 0.191238 | #DIV/0!  | 0.191238 |
| RP11-624A4.1__linc  | 0        | 0        | 0        | 0        | 5.59342  | 16.7206  | 0.189202 | 0        | 0        | #NUM!    | #NUM!    | 6.881879 | 0.269313 | 0.42265  | 0.27555  |
| RP11-624D11.2__lin  | 0        | 0        | 0        | 0        | 1.9451   | 12.3699  | 0        | 0        | 0        | #NUM!    | #DIV/0!  | #DIV/0!  | 0.339975 | #DIV/0!  | 0.339975 |
| RP11-624J12.1__linc | 0.02711  | 0.031969 | 0.360014 | 0.090055 | 1.72233  | 9.52049  | 0.146207 | 0.044452 | 0        | -4.7571  | 1.136275 | 5.893377 | 0.323581 | 0.652389 | 0.33457  |
| RP11-624L4.1__anti  | 2.09592  | 3.79353  | 3.47662  | 115.868  | 136.332  | 677.315  | 1.87105  | 3.84035  | 3.48234  | -6.63289 | 0.026792 | 6.659682 | 0.236833 | 0.566969 | 0.236714 |
| RP11-625I7.1__lincF | 0.695936 | 0        | 0        | 11.4028  | 66.5216  | 3.48562  | 0.349747 | 0        | 0        | -6.87011 | 0.992643 | 7.862751 | 0.309296 | 0.42265  | 0.306907 |
| RP11-625L16.1__lin  | 0        | 0        | 0.32745  | 0        | 2.16939  | 200.888  | 0.540631 | 0.211183 | 1.66915  | -9.2764  | -2.88624 | 6.390162 | 0.416439 | 0.173184 | 0.418572 |
| RP11-626G11.1__lin  | 0        | 1.30965  | 0.348094 | 0.589045 | 0.945946 | 0.610252 | 0.096994 | 0.324614 | 16.4917  | -0.37192 | -3.35087 | -2.97895 | 0.619784 | 0.455432 | 0.463793 |
| RP11-626H12.3__lin  | 0.053492 | 0.157699 | 0.508778 | 2.50156  | 0.486178 | 45.9273  | 0.340051 | 0.094779 | 0.189312 | -6.0862  | 0.206062 | 6.292261 | 0.388259 | 0.872445 | 0.391126 |
| RP11-626P14.2__lin  | 3.69126  | 22.7432  | 1.94375  | 5.47678  | 6.28294  | 2.87554  | 0        | 1.87212  | 2.34148  | 0.955335 | 2.751658 | 1.796323 | 0.521529 | 0.341873 | 0.146817 |
| RP11-627G23.1__pr   | 4.62296  | 6.54181  | 1.67433  | 9.48922  | 5.79197  | 61.9657  | 0.422641 | 3.19011  | 8.79966  | -2.58893 | 0.048761 | 2.637693 | 0.385277 | 0.972396 | 0.306764 |
| RP11-629G13.1__an   | 0        | 0        | 0        | 0        | 0        | 0        | 0        | 0        | 0        | #DIV/0!  | #DIV/0!  | #DIV/0!  | #DIV/0!  | #DIV/0!  | #DIV/0!  |
| RP11-62G11.2__linc  | 0        | 0        | 0        | 0        | 0.558991 | 0.498069 | 0        | 0        | 0        | #NUM!    | #DIV/0!  | #DIV/0!  | 0.184856 | #DIV/0!  | 0.184856 |
| RP11-62L18.3__lincI | 0        | 0        | 0        | 0        | 0        | 0        | 0        | 0        | 0        | #DIV/0!  | #DIV/0!  | #DIV/0!  | #DIV/0!  | #DIV/0!  | #DIV/0!  |
| RP11-630C16.1__lin  | 0        | 0        | 0        | 0.424588 | 0        | 0        | 0        | 0        | 0        | #NUM!    | #DIV/0!  | #DIV/0!  | 0.42265  | #DIV/0!  | 0.42265  |
| RP11-630D6.5__anti  | 37.0322  | 1.04226  | 2.31749  | 5.27394  | 12.5759  | 87.1176  | 0.889882 | 16.0827  | 5.61252  | -1.3778  | 0.838696 | 2.216499 | 0.591572 | 0.738305 | 0.417815 |
| RP11-631N16.2__an   | 0.726967 | 1.58836  | 0.792735 | 4.49302  | 5.45266  | 16.6121  | 1.06932  | 2.32957  | 3.68659  | -3.09505 | -1.18885 | 1.906197 | 0.189994 | 0.236283 | 0.181252 |
| RP11-632B21.1__lin  | 0        | 0        | 0        | 0        | 0        | 3.15043  | 0        | 0        | 0        | #NUM!    | #DIV/0!  | #DIV/0!  | 0.42265  | #DIV/0!  | 0.42265  |
| RP11-632K5.3__linc  | 0        | 0        | 0        | 0        | 0        | 2.40994  | 0.557636 | 0        | 0        | #NUM!    | #NUM!    | 2.111602 | 0.42265  | 0.42265  | 0.567666 |
| RP11-634B22.4__lin  | 0        | 0        | 0        | 0        | 2.27961  | 1.8544   | 0        | 0        | 0        | #NUM!    | #DIV/0!  | #DIV/0!  | 0.187788 | #DIV/0!  | 0.187788 |
| RP11-634B7.4__anti  | 0        | 0.141428 | 0.178777 | 0.053002 | 13.6958  | 67.6526  | 1.14754  | 0.065462 | 0        | -7.98991 | -1.92151 | 6.0684   | 0.319805 | 0.557117 | 0.329233 |
| RP11-635N19.1__an   | 0        | 0        | 0        | 0        | 1.61476  | 2.13128  | 0.233164 | 0        | 0        | #NUM!    | #NUM!    | 4.005949 | 0.191156 | 0.42265  | 0.244368 |
| RP11-636O21.1__lin  | 0.037123 | 0        | 0.074163 | 0        | 110.778  | 63.8248  | 0        | 0        | 0        | -10.6156 | #DIV/0!  | #DIV/0!  | 0.21179  | 0.225289 | 0.211515 |

|                     |          |          |          |          |          |          |          |          |          |          |          |          |          |          |          |
|---------------------|----------|----------|----------|----------|----------|----------|----------|----------|----------|----------|----------|----------|----------|----------|----------|
| RP11-637A17.2__lin  | 0        | 0        | 0        | 0        | 15.6804  | 12.8676  | 0        | 0        | 0        | #NUM!    | #DIV/0!  | #DIV/0!  | 0.187438 | #DIV/0!  | 0.187438 |
| RP11-638F5.1__linc  | 0.011995 | 0        | 1.00972  | 0.200566 | 170.886  | 432.287  | 0.778475 | 0.045735 | 0.373966 | -9.20592 | -0.22985 | 8.976068 | 0.250337 | 0.897801 | 0.251483 |
| RP11-638L2.4__antis | 0        | 0.20027  | 0.617163 | 0        | 9.69533  | 9.07124  | 0.081907 | 0        | 0        | -4.52092 | 3.319045 | 7.839966 | 0.184873 | 0.350672 | 0.187532 |
| RP11-638L3.1__lincl | 1.39981  | 0.372497 | 0.431887 | 0.240437 | 110.778  | 73.0158  | 0.150188 | 0.58588  | 0.610498 | -6.38358 | 0.710966 | 7.094545 | 0.205501 | 0.613232 | 0.200049 |
| RP11-63A11.1__anti  | 0        | 0.799528 | 1.3994   | 3.17929  | 67.5734  | 24.3722  | 0.780143 | 0.031959 | 0.249678 | -5.43495 | 1.050316 | 6.485266 | 0.241005 | 0.586394 | 0.243208 |
| RP11-63B13.1__linc  | 0.013171 | 0        | 0.039561 | 0        | 0        | 4.26256  | 0.038749 | 0.057596 | 0.04303  | -6.33688 | -1.40221 | 4.934671 | 0.424453 | 0.207435 | 0.435909 |
| RP11-63B19.1__linc  | 0        | 0        | 0.146866 | 0        | 0.019578 | 0.262865 | 0.125793 | 0        | 0        | -0.94346 | 0.223449 | 1.166909 | 0.334616 | 0.937083 | 0.690342 |
| RP11-63N8.3__antis  | 0        | 0        | 0.370543 | 0        | 1.75245  | 1.79162  | 0.040193 | 0        | 0        | -3.25769 | 3.204621 | 6.462315 | 0.187919 | 0.488277 | 0.192916 |
| RP11-640M9.2__pse   | 24.8295  | 7.14489  | 8.56373  | 28.39    | 4.87563  | 29.9723  | 3.75315  | 6.65004  | 8.06539  | -0.64151 | 1.134206 | 1.775717 | 0.399396 | 0.395778 | 0.217112 |
| RP11-640N20.6__ps   | 0        | 0        | 0.660933 | 0.523138 | 0.971324 | 7.05118  | 0        | 0        | 0.196897 | -3.69261 | 1.747063 | 5.439676 | 0.298012 | 0.42265  | 0.305704 |
| RP11-640N20.9__ps   | 26.949   | 45.4719  | 26.0337  | 19.4448  | 10.9369  | 22.5233  | 11.3214  | 23.2958  | 53.9001  | 0.896055 | 0.153499 | -0.74256 | 0.259518 | 0.852479 | 0.40726  |
| RP11-641A6.5__pse   | 8.51619  | 3.74295  | 1.93074  | 4.50365  | 53.071   | 4.31206  | 2.37213  | 7.09293  | 1.98236  | -2.12477 | 0.30984  | 2.434607 | 0.444223 | 0.773747 | 0.368118 |
| RP11-642P15.1__ps   | 206.139  | 115.211  | 134.989  | 89.116   | 55.8512  | 73.0158  | 75.1717  | 186.951  | 173.616  | 1.06589  | 0.066643 | -0.99925 | 0.05169  | 0.922891 | 0.2419   |
| RP11-643M14.1__ar   | 0.305355 | 0.402874 | 0.425858 | 0.3995   | 0.235667 | 0        | 0.108109 | 0        | 0.392311 | 0.836323 | 1.18032  | 0.343997 | 0.383311 | 0.186681 | 0.856609 |
| RP11-644C3.1__linc  | 0.960867 | 1.51261  | 0.974426 | 0        | 39.9278  | 216.364  | 0        | 0        | 0        | -6.21592 | #DIV/0!  | #DIV/0!  | 0.332789 | 0.024094 | 0.327461 |
| RP11-644L4.1__lincl | 0        | 0        | 0        | 0        | 0        | 7.78304  | 0.158611 | 0        | 0        | #NUM!    | #NUM!    | 5.616769 | 0.42265  | 0.42265  | 0.434533 |
| RP11-646E18.4__lin  | 0.135267 | 0        | 0.108199 | 0.143154 | 0.460391 | 0.283151 | 0.158706 | 0.117981 | 0        | -1.86472 | -0.18453 | 1.680185 | 0.246066 | 0.88145  | 0.207836 |
| RP11-646E20.6__ps   | 0        | 0.010767 | 0.219506 | 0.136384 | 2.49763  | 6.07571  | 0.089627 | 0.019981 | 0.05972  | -5.24121 | 0.443527 | 5.684735 | 0.230712 | 0.808181 | 0.24216  |
| RP11-648F7.1__linc  | 0        | 0.05792  | 0.073771 | 0.016323 | 0.183897 | 1.63612  | 0.060221 | 0.067132 | 0.093624 | -3.80161 | -0.74674 | 3.054869 | 0.372136 | 0.19548  | 0.397343 |
| RP11-64C1.1__lincR  | 0        | 0        | 0.057487 | 0        | 0.18388  | 0.10972  | 0.056268 | 0.083645 | 0.041652 | -2.35254 | -1.65917 | 0.69337  | 0.286861 | 0.297996 | 0.515805 |
| RP11-64C12.3__pse   | 0.039928 | 0.052184 | 2.2474   | 0.013061 | 0.149755 | 6.50091  | 3.22814  | 0.021824 | 0.080286 | -1.51012 | -0.50942 | 1.000698 | 0.413219 | 0.851625 | 0.732017 |
| RP11-64C12.8__linc  | 0        | 0        | 0.884115 | 0        | 34.9951  | 43.0083  | 0.07165  | 0        | 0        | -6.46316 | 3.625191 | 10.08835 | 0.18697  | 0.471173 | 0.188525 |
| RP11-64D22.2__pse   | 2.24093  | 12.9614  | 0.656962 | 2.02644  | 4.55845  | 11.7262  | 95.4319  | 25.0027  | 1.69824  | -0.20739 | -2.94505 | -2.73766 | 0.898155 | 0.347067 | 0.376525 |
| RP11-64D24.2__anti  | 46.8471  | 7.84187  | 17.3329  | 4.77702  | 100.521  | 899.74   | 1.90684  | 6.98383  | 10.029   | -3.80267 | 1.928548 | 5.731219 | 0.393558 | 0.326748 | 0.3636   |
| RP11-64D24.4__anti  | 0        | 0        | 1.43762  | 0        | 2.06162  | 337.008  | 0        | 0        | 0        | -7.88176 | #DIV/0!  | #DIV/0!  | 0.419114 | 0.42265  | 0.419129 |
| RP11-64I17.1__lincF | 0        | 0        | 0        | 0        | 3.61486  | 0        | 0        | 0        | 0        | #NUM!    | #DIV/0!  | #DIV/0!  | 0.42265  | #DIV/0!  | 0.42265  |
| RP11-64J4.2__sens   | 0        | 0.034996 | 0.088972 | 0        | 10.9162  | 73.2715  | 0.172366 | 0        | 0.048281 | -9.4075  | -0.83178 | 8.575723 | 0.344017 | 0.690808 | 0.345175 |
| RP11-64K12.10__se   | 0.077078 | 0        | 0.154249 | 0.127781 | 0.143899 | 2.10552  | 0.094359 | 0.021041 | 0.062865 | -3.36126 | 0.375913 | 3.737173 | 0.367002 | 0.67872  | 0.379681 |
| RP11-652G5.1__pse   | 0        | 0        | 0.545392 | 0.355547 | 3.0294   | 5.53662  | 0.970427 | 0.196993 | 0.293597 | -4.03193 | -1.42161 | 2.610324 | 0.173257 | 0.482607 | 0.281008 |
| RP11-653G8.2__linc  | 0        | 0        | 0.103212 | 0        | 2.30727  | 0        | 0        | 0        | 0        | -4.4825  | #DIV/0!  | #DIV/0!  | 0.449028 | 0.42265  | 0.42265  |
| RP11-654A16.3__an   | 0.855268 | 0.552559 | 1.74436  | 0.859824 | 9.40814  | 152.669  | 1.40288  | 0.517519 | 0.207115 | -5.69182 | 0.567184 | 6.259001 | 0.389805 | 0.637558 | 0.392075 |
| RP11-654C22.2__lin  | 0        | 0.182457 | 0.752973 | 0.20382  | 1.61844  | 683.741  | 0.48876  | 0        | 0        | -9.51744 | 0.936503 | 10.45395 | 0.421265 | 0.718481 | 0.421525 |
| RP11-654D12.3__lin  | 0        | 0        | 0        | 0        | 0        | 0        | 0        | 0        | 0        | #DIV/0!  | #DIV/0!  | #DIV/0!  | #DIV/0!  | #DIV/0!  | #DIV/0!  |
| RP11-655G22.1__lin  | 0        | 0        | 0.080221 | 0        | 0.475189 | 12.0881  | 0.155909 | 0        | 0        | -7.29102 | -0.95866 | 6.332366 | 0.400272 | 0.750773 | 0.407907 |
| RP11-655H13.2__lin  | 0        | 0        | 1.13321  | 0        | 2.73621  | 6.47636  | 0.080232 | 0        | 0        | -3.02319 | 3.820094 | 6.843282 | 0.222953 | 0.464866 | 0.25011  |



|                     |          |          |          |          |          |          |          |          |          |          |          |          |          |          |          |
|---------------------|----------|----------|----------|----------|----------|----------|----------|----------|----------|----------|----------|----------|----------|----------|----------|
| RP11-655M14.13__l   | 0.687788 | 0.076399 | 0.648563 | 1.49341  | 1.4508   | 0.146291 | 2.06525  | 0.593231 | 1.57931  | -1.12933 | -1.58481 | -0.45547 | 0.420114 | 0.063118 | 0.624754 |
| RP11-656A15.1__lin  | 0        | 0        | 1.37048  | 0        | 1.85545  | 183.916  | 1.77113  | 0        | 0        | -7.0827  | -0.36999 | 6.712715 | 0.416811 | 0.896709 | 0.422441 |
| RP11-659G9.3__sen   | 0.735547 | 5.49987  | 3.95972  | 12.5239  | 14.2549  | 51.6337  | 1.17291  | 3.22596  | 1.54664  | -2.9432  | 0.778009 | 3.721211 | 0.210464 | 0.266375 | 0.203495 |
| RP11-65D24.1__sen   | 0        | 0.762496 | 0.874901 | 7.27895  | 29.7198  | 222.268  | 1.17403  | 0.127935 | 0.190996 | -7.30689 | 0.133228 | 7.440117 | 0.33418  | 0.944391 | 0.335964 |
| RP11-65J21.1__lincf | 0        | 0        | 0        | 0.38877  | 0.857224 | 4.59397  | 0.674922 | 0        | 0        | #NUM!    | #NUM!    | 3.113167 | 0.280995 | 0.42265  | 0.363087 |
| RP11-65J21.3__lincf | 1.30916  | 8.54     | 1.87995  | 2.18211  | 4.30626  | 3.34219  | 2.81747  | 0.711137 | 1.47359  | 0.254748 | 1.22946  | 0.974712 | 0.759801 | 0.513504 | 0.320291 |
| RP11-65J21.4__lincf | 0        | 0.080936 | 0.668183 | 0        | 4.88073  | 4.63358  | 0.326533 | 0        | 0        | -3.66683 | 1.197965 | 4.864798 | 0.187178 | 0.673864 | 0.212718 |
| RP11-65L3.1__lincR  | 0        | 0        | 0        | 0.116753 | 0.093777 | 0.335182 | 0.345838 | 0.096443 | 0.143956 | #NUM!    | #NUM!    | -0.10334 | 0.141773 | 0.125006 | 0.921597 |
| RP11-65M17.3__linc  | 0.597641 | 0.992299 | 0.432378 | 3.5395   | 8.30495  | 238.001  | 1.12297  | 0        | 1.6418   | -6.94888 | -0.45115 | 6.497733 | 0.39806  | 0.740249 | 0.396864 |
| RP11-661C8.2__linc  | 0        | 2.00196  | 4.41798  | 3.58859  | 6.23161  | 2.91377  | 1.04227  | 0        | 0        | -0.98805 | 2.622831 | 3.610881 | 0.36571  | 0.374174 | 0.079765 |
| RP11-661D19.3__lin  | 0        | 0        | 0        | 0        | 1.87507  | 16.128   | 0        | 0        | 0        | #NUM!    | #DIV/0!  | #DIV/0!  | 0.359838 | #DIV/0!  | 0.359838 |
| RP11-661G16.2__an   | 0        | 0        | 0.046326 | 0.1434   | 2.97864  | 11.212   | 0        | 0        | 0.083954 | -8.27341 | -0.85779 | 7.415624 | 0.286234 | 0.42265  | 0.285868 |
| RP11-661P17.1__lin  | 6.52801  | 2.23796  | 2.39809  | 26.7649  | 4.68023  | 95.6924  | 3.91431  | 2.81852  | 4.18613  | -3.50946 | 0.032026 | 3.541483 | 0.298841 | 0.956047 | 0.288714 |
| RP11-662M24.1__lin  | 0        | 0        | 0.770544 | 0        | 1.34651  | 0.135842 | 1.78729  | 0        | 0.469663 | -0.94394 | -1.55043 | -0.60649 | 0.723927 | 0.526506 | 0.802336 |
| RP11-664D1.1__anti  | 0        | 1.02632  | 0        | 0        | 2.98281  | 12.2651  | 0.08562  | 0        | 1.87708  | -3.89306 | -0.93536 | 2.9577   | 0.338911 | 0.747498 | 0.290328 |
| RP11-664H17.1__lin  | 0.698766 | 0.258706 | 2.131    | 0        | 29.1231  | 6.92982  | 0        | 0        | 0.078479 | -3.54515 | 5.29845  | 8.843601 | 0.349753 | 0.204144 | 0.305778 |
| RP11-665G4.1__ant   | 30.907   | 28.5197  | 630.833  | 5.62684  | 370.636  | 238.001  | 25.4546  | 30.6921  | 20.6424  | 0.168281 | 3.168166 | 2.999885 | 0.915871 | 0.419573 | 0.231865 |
| RP11-665I14.1__linc | 0        | 0        | 0        | 0        | 152.22   | 48.7652  | 0        | 0        | 0        | #NUM!    | #DIV/0!  | #DIV/0!  | 0.274033 | #DIV/0!  | 0.274033 |
| RP11-665J16.1__an   | 8.63095  | 2.89656  | 2.24976  | 4.3563   | 285.253  | 18.2332  | 0.33403  | 4.63922  | 8.06763  | -4.48183 | 0.079249 | 4.561079 | 0.399738 | 0.958651 | 0.393919 |
| RP11-666A8.9__anti  | 0        | 0        | 0        | 0        | 0        | 16.6316  | 0        | 0        | 0        | #NUM!    | #DIV/0!  | #DIV/0!  | 0.42265  | #DIV/0!  | 0.42265  |
| RP11-666E17.1__lin  | 0        | 0        | 0        | 0.15562  | 32.6892  | 35.4981  | 0        | 0        | 1.76843  | #NUM!    | #NUM!    | 5.272251 | 0.182338 | 0.42265  | 0.181695 |
| RP11-667K14.5__an   | 0        | 2.1241   | 1.28052  | 0        | 1.38583  | 10.7446  | 0        | 0        | 0.44357  | -1.83307 | 2.94026  | 4.773325 | 0.4693   | 0.251191 | 0.350825 |
| RP11-669I1.1__lincF | 0        | 0        | 0.080527 | 0.213094 | 1.66681  | 17.7696  | 0.131244 | 0.058539 | 0        | -7.93081 | -1.23682 | 6.693998 | 0.364154 | 0.617077 | 0.370317 |
| RP11-669M16.1__lin  | 0.436163 | 0        | 0.68801  | 0        | 2.57613  | 23.9621  | 0        | 0        | 0        | -4.56114 | #DIV/0!  | #DIV/0!  | 0.3735   | 0.203253 | 0.364243 |
| RP11-669M2.1__linc  | 0        | 0        | 0.231377 | 0        | 1.07485  | 212.705  | 0        | 0        | 0        | -9.85166 | #DIV/0!  | #DIV/0!  | 0.419736 | 0.42265  | 0.41974  |
| RP11-669N7.2__anti  | 0        | 0.220914 | 0.184092 | 0        | 0        | 19.0158  | 0.148579 | 0.044047 | 1.57004  | -5.55311 | -2.12174 | 3.431368 | 0.429462 | 0.442129 | 0.429047 |
| RP11-669N7.3__linc  | 0.058823 | 0        | 0        | 0.138677 | 0        | 0        | 0        | 0        | 0        | -1.23728 | #DIV/0!  | #DIV/0!  | 0.42265  | 0.42265  | 0.42265  |
| RP11-66A2.2__lincR  | 0.110718 | 0.086743 | 0        | 0.173758 | 1.94384  | 13.0602  | 0.2596   | 0.194647 | 0.528333 | -6.26425 | -2.315   | 3.949244 | 0.344369 | 0.189709 | 0.352312 |
| RP11-66B24.4__anti  | 0        | 1.04489  | 3.17061  | 0        | 2.05099  | 12.5965  | 1.27089  | 0        | 1.3222   | -1.79688 | 0.701031 | 2.497909 | 0.364634 | 0.621473 | 0.39637  |
| RP11-66B24.5__linc  | 0        | 0.187178 | 1.92754  | 0        | 70.7841  | 30.7991  | 0.770072 | 0        | 0.1012   | -5.58605 | 1.27927  | 6.865323 | 0.247066 | 0.639402 | 0.246402 |
| RP11-66B24.8__linc  | 0.031336 | 0.137246 | 0.342362 | 0.10584  | 2.67898  | 1.94755  | 0.234056 | 0.177748 | 0.196205 | -3.21133 | -0.25093 | 2.960398 | 0.189502 | 0.778649 | 0.220839 |
| RP11-66D17.3__linc  | 0.014047 | 0.016562 | 0.175899 | 0.879326 | 10.7243  | 8.37941  | 0.473342 | 0.038436 | 0.099568 | -6.59643 | -1.56579 | 5.030641 | 0.15527  | 0.498542 | 0.173029 |
| RP11-66N24.4__anti  | 4.81923  | 8.14732  | 4.99529  | 9.21787  | 6.37034  | 74.287   | 3.46526  | 5.55846  | 4.34259  | -2.32299 | 0.426334 | 2.749322 | 0.402205 | 0.11369  | 0.370631 |
| RP11-672L10.1__lin  | 0        | 0        | 2.39859  | 0.153917 | 0.370997 | 21.9843  | 0.151881 | 0        | 0        | -3.23026 | 3.981173 | 7.21143  | 0.407301 | 0.460289 | 0.412937 |
| RP11-672L10.3__an   | 0.018524 | 0.021842 | 0.092764 | 0.098592 | 2.06763  | 22.9028  | 0.036361 | 0.374916 | 0.373513 | -7.55693 | -2.55948 | 4.997455 | 0.371369 | 0.166589 | 0.379428 |

|                     |          |          |          |          |          |          |          |          |          |          |          |          |          |          |          |
|---------------------|----------|----------|----------|----------|----------|----------|----------|----------|----------|----------|----------|----------|----------|----------|----------|
| RP11-673C5.2__anti  | 65.7405  | 0.080665 | 0.027394 | 43.3972  | 2.66782  | 51.4972  | 0.02683  | 0.014955 | 0.014897 | -0.56717 | 10.18207 | 10.74924 | 0.674027 | 0.421963 | 0.164369 |
| RP11-673E1.4__anti  | 0.108404 | 0.479875 | 4.14301  | 0.029518 | 4.46518  | 23.6573  | 0.503478 | 0        | 0        | -2.57293 | 3.232233 | 5.805165 | 0.321093 | 0.417353 | 0.33708  |
| RP11-673E11.2__lin  | 0        | 0        | 0.22169  | 0        | 0.337994 | 0.665691 | 0.186061 | 0.069143 | 0        | -2.17869 | -0.20311 | 1.975584 | 0.190904 | 0.934975 | 0.417332 |
| RP11-674N23.1__an   | 0        | 0        | 0        | 0        | 3.17341  | 4.80788  | 1.02766  | 0        | 0        | #NUM!    | #NUM!    | 2.957259 | 0.200104 | 0.42265  | 0.313929 |
| RP11-674P19.2__lin  | 2.7844   | 0.34122  | 0.260699 | 0.2114   | 4.14333  | 0.138446 | 0.070919 | 0.158124 | 0.078753 | -0.40802 | 3.459672 | 3.86769  | 0.860851 | 0.347923 | 0.394094 |
| RP11-676J15.1__linc | 0        | 0        | 0.33067  | 0        | 170.886  | 43.3722  | 0        | 0        | 0        | -9.33974 | #DIV/0!  | #DIV/0!  | 0.299121 | 0.42265  | 0.29836  |
| RP11-677M14.3__ar   | 0.436701 | 0.404063 | 1.1592   | 2.65308  | 0.605647 | 2.50074  | 0.908978 | 0.848205 | 0.600999 | -1.52596 | -0.2377  | 1.28826  | 0.164722 | 0.758252 | 0.241895 |
| RP11-677M14.7__ar   | 2.57917  | 1.74462  | 2.51765  | 2.02767  | 100.539  | 4.55734  | 1.40915  | 2.55104  | 2.48888  | -3.96884 | 0.085209 | 4.054047 | 0.414087 | 0.840614 | 0.406962 |
| RP11-677O4.2__linc  | 0.015662 | 0        | 0.047066 | 0.02085  | 0.058739 | 0.383326 | 0.046129 | 0        | 0.102457 | -2.88358 | -1.24414 | 1.639448 | 0.323217 | 0.215875 | 0.369994 |
| RP11-678G14.2__ar   | 0.05324  | 0.020926 | 1.20414  | 0.188937 | 0.171081 | 30.0971  | 0.875901 | 2.28318  | 0.087052 | -4.57447 | -1.34449 | 3.229986 | 0.416952 | 0.571881 | 0.477928 |
| RP11-678G14.3__lin  | 0.087254 | 0.051855 | 0.472119 | 0        | 0.078325 | 116.386  | 0.100586 | 0.525112 | 0.159565 | -7.57396 | -0.36147 | 7.212496 | 0.422953 | 0.822885 | 0.425373 |
| RP11-678G15.1__se   | 0.346371 | 0.090776 | 0.327329 | 0.127606 | 0.143702 | 0.146993 | 0.056538 | 0.357198 | 0.188335 | 0.869929 | 0.344537 | -0.52539 | 0.307014 | 0.775413 | 0.536238 |
| RP11-678G15.2__ar   | 0        | 0        | 0        | 0        | 0.074522 | 3.10033  | 0.068391 | 0        | 0        | #NUM!    | #NUM!    | 5.536735 | 0.408943 | 0.42265  | 0.421816 |
| RP11-679C8.2__anti  | 10.0873  | 6.82001  | 11.8828  | 5.97611  | 15.6804  | 216.364  | 11.5851  | 9.0313   | 13.7429  | -3.04744 | -0.25513 | 2.792313 | 0.409913 | 0.012088 | 0.42022  |
| RP11-67M1.1__antis  | 0        | 0        | 0        | 0        | 0.035831 | 3.47812  | 0.671613 | 0        | 0        | #NUM!    | #NUM!    | 2.387392 | 0.416733 | 0.42265  | 0.536767 |
| RP11-680B3.2__anti  | 3.04205  | 0.384381 | 0.362411 | 1.46548  | 4.40715  | 24.048   | 0.165909 | 16.2067  | 8.79451  | -2.98131 | -2.73171 | 0.2496   | 0.373363 | 0.320264 | 0.85801  |
| RP11-680E19.1__ps   | 0        | 0        | 0        | 0.092062 | 2.05927  | 105.531  | 0.824488 | 0        | 0.395563 | #NUM!    | #NUM!    | 6.463696 | 0.410992 | 0.229719 | 0.41549  |
| RP11-680F20.10__li  | 0        | 0.212005 | 0.089828 | 0        | 0.477379 | 53.9086  | 1.53927  | 0        | 0.227473 | -7.49334 | -2.54927 | 4.944071 | 0.41981  | 0.457803 | 0.434325 |
| RP11-680F20.9__an   | 4.91102  | 2.55     | 2.86461  | 1.34094  | 3.09834  | 4.06134  | 3.54516  | 3.21206  | 3.23503  | 0.28059  | 0.047348 | -0.23324 | 0.723086 | 0.876807 | 0.634586 |
| RP11-680F8.1__anti  | 0.070366 | 0.069146 | 0.064589 | 0.265071 | 2.89741  | 0.471934 | 0.08053  | 0.064122 | 0.368468 | -4.15438 | -1.33002 | 2.824354 | 0.308505 | 0.41329  | 0.365727 |
| RP11-680F8.4__sen   | 0.603932 | 0.958856 | 0.650537 | 0.338432 | 0.272166 | 0.420652 | 0.545509 | 0.304123 | 0.277608 | 1.101821 | 0.973421 | -0.1284  | 0.11515  | 0.170297 | 0.781554 |
| RP11-685M7.3__ant   | 154.771  | 94.2243  | 127.803  | 69.7606  | 28.7364  | 32.2794  | 67.7795  | 163.237  | 134.485  | 1.52669  | 0.043915 | -1.48278 | 0.011319 | 0.94137  | 0.197824 |
| RP11-685M7.5__ant   | 0        | 0.436011 | 0        | 0        | 2.90551  | 0        | 1.13334  | 0        | 0        | -2.73635 | -1.37814 | 1.358211 | 0.42265  | 0.668453 | 0.671929 |
| RP11-686F15.2__lin  | 0        | 0        | 0.784951 | 0.168259 | 0        | 8.24722  | 0        | 0        | 0        | -3.42237 | #DIV/0!  | #DIV/0!  | 0.409782 | 0.42265  | 0.410993 |
| RP11-687F6.1__linc  | 1.00099  | 0.683365 | 0.369768 | 1.96731  | 0.278875 | 0.099622 | 0.617974 | 0.229814 | 0.400095 | -0.19156 | 0.71904  | 0.910601 | 0.844335 | 0.216906 | 0.541743 |
| RP11-688I9.4__lincF | 0        | 0.031137 | 1.68109  | 0.087724 | 4.1479   | 4.94154  | 0.128245 | 0.043299 | 0.014377 | -2.42217 | 3.203112 | 5.625286 | 0.179419 | 0.472859 | 0.190533 |
| RP11-689B22.2__an   | 3.97759  | 0.433786 | 6.54396  | 0.687848 | 1.40233  | 5.83093  | 0.135331 | 3.20646  | 2.29184  | 0.46786  | 0.959497 | 0.491637 | 0.499868 | 0.517391 | 0.670708 |
| RP11-689P11.2__lin  | 0        | 0        | 4.9304   | 10.008   | 104.557  | 46.9181  | 1.09137  | 0        | 1.11453  | -5.03353 | 1.160337 | 6.193872 | 0.200948 | 0.603668 | 0.196848 |
| RP11-68I3.2__antise | 3.40791  | 3.47701  | 4.65303  | 85.0404  | 775.751  | 131.998  | 12.7092  | 8.44703  | 6.29047  | -6.42703 | -1.25025 | 5.176783 | 0.280098 | 0.139362 | 0.286275 |
| RP11-690C23.4__ps   | 0.034045 | 0.120485 | 1.0107   | 0.08987  | 1.62413  | 1.80987  | 0.298425 | 0        | 0        | -1.59655 | 1.965175 | 3.56172  | 0.200723 | 0.52412  | 0.237011 |
| RP11-690I21.2__ser  | 0.082719 | 0.181148 | 1.04854  | 0.314215 | 0.177003 | 3.02986  | 0.092734 | 0.025844 | 0.077235 | -1.4238  | 2.744669 | 4.168472 | 0.36075  | 0.344648 | 0.352449 |
| RP11-690J15.1__linc | 0        | 0        | 0.435629 | 2.29727  | 12.8794  | 1277.67  | 1.72205  | 0.479813 | 0.079501 | -11.5352 | -2.38872 | 9.146439 | 0.41582  | 0.415377 | 0.416814 |
| RP11-691H4.4__anti  | 0        | 16.1817  | 1.35055  | 2.76101  | 3.62757  | 637.067  | 1.47695  | 0        | 11.5686  | -5.19776 | 0.426453 | 5.624211 | 0.43166  | 0.865046 | 0.418127 |
| RP11-692D12.1__an   | 4.33823  | 1.32384  | 1.15056  | 3.67161  | 16.1248  | 7.44449  | 1.19634  | 2.37077  | 1.87891  | -1.99949 | 0.32301  | 2.3225   | 0.267319 | 0.767313 | 0.163483 |
| RP11-693J15.4__an   | 0.308991 | 0.121537 | 0        | 0        | 3.18647  | 21.7368  | 0        | 0        | 0        | -5.85524 | #DIV/0!  | #DIV/0!  | 0.355885 | 0.251386 | 0.345014 |

|                     |          |          |          |          |          |          |          |          |          |          |          |          |          |          |          |
|---------------------|----------|----------|----------|----------|----------|----------|----------|----------|----------|----------|----------|----------|----------|----------|----------|
| RP11-694I15.7__pse  | 0.119833 | 0.831047 | 1.37875  | 0.264822 | 29.883   | 148.178  | 0.176015 | 0.04361  | 0.065147 | -6.25827 | 3.032222 | 9.290493 | 0.32099  | 0.22966  | 0.319658 |
| RP11-696F12.1__lin  | 0        | 0        | 0.852699 | 1.05414  | 0        | 3.09261  | 0        | 1.88343  | 0.215049 | -2.28187 | -1.29924 | 0.982637 | 0.231762 | 0.638284 | 0.67124  |
| RP11-696N14.1__an   | 11.4878  | 9.29867  | 9.29166  | 5.83276  | 48.4548  | 189.602  | 5.33348  | 64.18    | 6.80245  | -3.01944 | -1.34327 | 1.676172 | 0.331287 | 0.5171   | 0.472688 |
| RP11-697E2.4__linc  | 0.21878  | 0.129209 | 0.325529 | 0        | 4.87809  | 3.3754   | 0        | 0        | 0.815936 | -3.61522 | -0.27674 | 3.338476 | 0.225178 | 0.851128 | 0.220503 |
| RP11-697E2.7__pse   | 0        | 0        | 1.3954   | 1.85384  | 4.59613  | 10.4338  | 0.922239 | 0        | 0        | -3.59689 | 0.597466 | 4.194353 | 0.132493 | 0.836676 | 0.194406 |
| RP11-697E22.2__an   | 9.74873  | 9.64063  | 6.78037  | 5.31688  | 12.0936  | 9.17428  | 20.1431  | 9.20654  | 14.3922  | -0.0227  | -0.74111 | -0.71841 | 0.957231 | 0.212981 | 0.380144 |
| RP11-699L21.1__lin  | 0.027919 | 1.51014  | 25.3993  | 0.350809 | 11.462   | 19.0677  | 2.77106  | 0.193189 | 0.192244 | -0.19709 | 3.093214 | 3.290302 | 0.807065 | 0.459241 | 0.276256 |
| RP11-69C17.2__linc  | 0        | 0        | 0.971501 | 0        | 0        | 0        | 0        | 0        | 0.103511 | #DIV/0!  | 3.230431 | #NUM!    | 0.42265  | 0.42265  | 0.42265  |
| RP11-69C17.3__linc  | 0        | 0        | 0        | 0        | 0        | 1.92791  | 0        | 0        | 0.013969 | #NUM!    | #NUM!    | 7.108675 | 0.42265  | 0.42265  | 0.42265  |
| RP11-69C17.4__linc  | 0        | 0        | 3.15562  | 0        | 2.97004  | 7.15577  | 1.42266  | 0        | 0        | -1.68204 | 1.149333 | 2.831374 | 0.192277 | 0.710955 | 0.362112 |
| RP11-69E11.4__anti  | 0        | 10.6187  | 1.60625  | 2.62581  | 2.01466  | 34.48    | 0        | 1.97047  | 0        | -1.6781  | 2.633217 | 4.311312 | 0.544394 | 0.326928 | 0.379738 |
| RP11-69H14.6__sen   | 0.046573 | 0.125061 | 0.148443 | 0.137396 | 9.83157  | 21.609   | 0.974286 | 0        | 0.268017 | -6.62436 | -1.95653 | 4.667829 | 0.233806 | 0.435794 | 0.25508  |
| RP11-69H7.2__antis  | 0        | 0.094285 | 0.396    | 0.145756 | 1.93057  | 3.86577  | 0.17614  | 0.043641 | 0        | -3.59928 | 1.157554 | 4.756833 | 0.198761 | 0.642091 | 0.232003 |
| RP11-6B19.2__lincR  | 0        | 0        | 0        | 0        | 0        | 1.54503  | 0        | 0        | 0        | #NUM!    | #DIV/0!  | #DIV/0!  | 0.42265  | #DIV/0!  | 0.42265  |
| RP11-6B4.1__lincRN  | 1.16859  | 0.027798 | 0.416868 | 0.164914 | 11.5491  | 2.87051  | 0.63973  | 0.025779 | 0.03852  | -3.17639 | 1.19627  | 4.372661 | 0.366542 | 0.192724 | 0.325185 |
| RP11-6C14.1__lincR  | 0        | 0        | 1.60312  | 0        | 3.21054  | 3.28262  | 0        | 0        | 0        | -2.01804 | #DIV/0!  | #DIV/0!  | 0.220802 | 0.42265  | 0.183554 |
| RP11-6F2.5__lincRN  | 0.096376 | 0        | 0        | 2.47583  | 1.95775  | 0        | 0.47434  | 0        | 0        | -5.52365 | -2.29917 | 3.224479 | 0.187336 | 0.42265  | 0.183553 |
| RP11-6J21.2__lincR  | 0.072229 | 0        | 0.804835 | 20.6801  | 8.05371  | 43.0083  | 2.23777  | 0        | 0        | -6.35399 | -1.35131 | 5.002687 | 0.141395 | 0.659951 | 0.154901 |
| RP11-6L6.3__lincRN  | 0.181624 | 0        | 0.16008  | 0        | 10.949   | 13.181   | 0.235095 | 0        | 0.208437 | -6.14194 | -0.37629 | 5.765646 | 0.192746 | 0.184531 | 0.194482 |
| RP11-6L6.7__antisei | 0.189887 | 0        | 0        | 0        | 0.100194 | 0.402801 | 0        | 0        | 0        | -1.4054  | #DIV/0!  | #DIV/0!  | 0.603957 | 0.42265  | 0.300358 |
| RP11-6N17.1__lincR  | 0        | 0        | 0.785168 | 0        | 2.6749   | 3.56688  | 0.324393 | 0        | 0.180046 | -2.99088 | 0.638322 | 3.629206 | 0.18366  | 0.763936 | 0.234633 |
| RP11-6N17.9__proci  | 37.8162  | 25.2265  | 26.6089  | 23.9643  | 8.39011  | 34.4135  | 30.4301  | 39.8647  | 49.9063  | 0.425174 | -0.42305 | -0.84822 | 0.429466 | 0.380883 | 0.135183 |
| RP11-700H6.1__linc  | 0.146422 | 1.61452  | 0.296401 | 0.233386 | 1.23925  | 0.350261 | 1.15607  | 0.330411 | 0.526013 | 0.174549 | 0.031798 | -0.14275 | 0.652003 | 0.984303 | 0.916247 |
| RP11-701B16.2__pri  | 17.1164  | 10.3212  | 9.99237  | 6.17443  | 2.21429  | 31.4069  | 5.21947  | 10.1839  | 5.07479  | -0.08842 | 0.870108 | 0.958524 | 0.946181 | 0.239772 | 0.594855 |
| RP11-701I24.3__ant  | 0        | 0        | 0        | 1.94877  | 0        | 1.76299  | 0.212634 | 0        | 0        | #NUM!    | #NUM!    | 4.125659 | 0.184524 | 0.42265  | 0.183527 |
| RP11-701P16.1__ps   | 0.322436 | 0.108698 | 0.275829 | 0.242232 | 2.50681  | 0.347635 | 0.089707 | 0.150103 | 0.099574 | -2.13101 | 1.058717 | 3.189732 | 0.42525  | 0.280264 | 0.329612 |
| RP11-701P16.4__lin  | 0        | 0        | 0        | 0.089837 | 4.12307  | 0        | 0        | 0        | 0        | #NUM!    | #DIV/0!  | #DIV/0!  | 0.41021  | #DIV/0!  | 0.41021  |
| RP11-702B10.1__lin  | 0        | 0        | 0        | 0        | 1.15212  | 23.1152  | 0        | 0        | 0        | #NUM!    | #DIV/0!  | #DIV/0!  | 0.394625 | #DIV/0!  | 0.394625 |
| RP11-702F3.3__linc  | 0        | 0        | 0        | 0        | 0.412125 | 5.27097  | 0.172447 | 0        | 0.114865 | #NUM!    | #NUM!    | 4.305987 | 0.379402 | 0.199423 | 0.398067 |
| RP11-702H23.4__an   | 7.74173  | 7.29201  | 10.593   | 9.83755  | 6.94635  | 714.898  | 13.0283  | 7.37097  | 6.12327  | -4.83549 | -0.04957 | 4.785926 | 0.421218 | 0.925297 | 0.425601 |
| RP11-702L6.4__lincl | 0.124185 | 0        | 1.83158  | 0.192062 | 36.7152  | 26.7727  | 0.263435 | 0        | 0.022501 | -5.02503 | 2.773971 | 7.799005 | 0.197114 | 0.468662 | 0.194294 |
| RP11-703G6.1__linc  | 0.068255 | 0.122357 | 0.582492 | 0.047375 | 1.435    | 3.86043  | 0.211777 | 0.092516 | 0.189566 | -2.78886 | 0.646564 | 3.435427 | 0.252824 | 0.61557  | 0.28439  |
| RP11-703H8.9__anti  | 0.074021 | 0        | 0        | 0        | 386.031  | 317.673  | 0        | 0.479813 | 0.556509 | -13.2148 | -3.8074  | 9.407353 | 0.187414 | 0.247698 | 0.187348 |
| RP11-703I16.1__ant  | 0        | 0        | 0.545177 | 0        | 2.80084  | 0        | 0        | 0        | 0        | -2.36106 | #DIV/0!  | #DIV/0!  | 0.543595 | 0.42265  | 0.42265  |
| RP11-703M24.5__ar   | 58.2884  | 108.651  | 19.4138  | 9.99187  | 48.1805  | 38.4988  | 62.8735  | 368.995  | 11.2816  | 0.946882 | -1.24976 | -2.19664 | 0.35041  | 0.430882 | 0.386909 |

|                    |          |          |          |          |          |          |          |          |          |          |          |          |          |          |          |
|--------------------|----------|----------|----------|----------|----------|----------|----------|----------|----------|----------|----------|----------|----------|----------|----------|
| RP11-704C2.1__linc | 0        | 0        | 0.01588  | 0.021065 | 10.9434  | 2.81508  | 0.031098 | 0.104008 | 0.051798 | -9.76111 | -3.55703 | 6.204085 | 0.296509 | 0.136468 | 0.298439 |
| RP11-704M14.1__ar  | 0        | 0.009862 | 0.676846 | 1.89644  | 365.72   | 2.83766  | 0.086676 | 8.64717  | 0.374612 | -9.07538 | -3.72944 | 5.345944 | 0.416263 | 0.437431 | 0.415762 |
| RP11-705C15.2__ps  | 17.6444  | 3.62217  | 1.39983  | 6.39293  | 5.52814  | 52.7623  | 0.487398 | 3.56202  | 1.64818  | -1.51284 | 1.99213  | 3.504969 | 0.538943 | 0.429046 | 0.338622 |
| RP11-705O1.8__linc | 0.014053 | 0.082858 | 0        | 0.280043 | 0        | 2.62872  | 0        | 0.06144  | 0.198902 | -4.90761 | -1.42568 | 3.481924 | 0.385867 | 0.529495 | 0.375043 |
| RP11-706D8.3__linc | 0        | 0        | 2.30478  | 4.05155  | 3.42662  | 15.3181  | 0.444738 | 0        | 0        | -3.3061  | 2.373601 | 5.679698 | 0.158167 | 0.542497 | 0.198754 |
| RP11-706F1.1__linc | 0        | 5.29468  | 0        | 0.94021  | 3.06858  | 3.1826   | 0.37485  | 0        | 0        | -0.44173 | 3.820158 | 4.261885 | 0.725963 | 0.464864 | 0.116998 |
| RP11-706F1.2__linc | 0        | 2.76477  | 1.1308   | 0        | 4.34901  | 0        | 0        | 0        | 0        | -0.15885 | #DIV/0!  | #DIV/0!  | 0.865499 | 0.247055 | 0.42265  |
| RP11-707A18.1__lin | 0.014193 | 0        | 0.559103 | 0        | 12.8644  | 2.07708  | 0.020905 | 0.015535 | 0        | -4.7039  | 3.975705 | 8.679604 | 0.359604 | 0.445876 | 0.338842 |
| RP11-707M1.1__pse  | 0        | 0.016165 | 0.054895 | 0.548259 | 56.1082  | 131.998  | 0.080647 | 0        | 0.089555 | -11.3744 | -1.26015 | 10.11428 | 0.240587 | 0.358695 | 0.24085  |
| RP11-708B6.2__anti | 0        | 0.061263 | 0.033812 | 1.40916  | 21.6376  | 86.8553  | 0.56067  | 0.047507 | 0.037786 | -10.1749 | -2.76431 | 7.410552 | 0.291442 | 0.432908 | 0.294937 |
| RP11-709D24.6__an  | 0        | 0.023538 | 0        | 0        | 0.127715 | 16.585   | 0.078173 | 0        | 0        | -9.47176 | -1.73171 | 7.740058 | 0.419035 | 0.613622 | 0.420949 |
| RP11-70C1.1__antis | 0.206552 | 0        | 0        | 0        | 0        | 0        | 0        | 0        | 0        | #DIV/0!  | #DIV/0!  | #DIV/0!  | 0.42265  | 0.42265  | #DIV/0!  |
| RP11-70F11.7__linc | 0        | 0        | 0        | 0        | 1.16174  | 0        | 0.312503 | 0        | 0        | #NUM!    | #NUM!    | 1.894345 | 0.42265  | 0.42265  | 0.592442 |
| RP11-70F11.8__linc | 0.076964 | 0.060032 | 1.09357  | 0.169157 | 2.96069  | 2.12616  | 0        | 0.147311 | 0.374257 | -2.09465 | 1.238394 | 3.33304  | 0.245511 | 0.438233 | 0.176322 |
| RP11-710F7.3__anti | 0.999925 | 1.23065  | 1.34465  | 1.69765  | 0.026539 | 4.61451  | 0.387135 | 0.054211 | 0.027005 | -0.82615 | 2.932372 | 3.758525 | 0.551032 | 0.04061  | 0.28963  |
| RP11-711C17.1__lin | 0        | 0        | 0        | 0        | 0        | 0        | 0        | 0        | 0        | #DIV/0!  | #DIV/0!  | #DIV/0!  | #DIV/0!  | #DIV/0!  | #DIV/0!  |
| RP11-711C17.2__lin | 0        | 0        | 0        | 0        | 1.91901  | 1.83218  | 0        | 0        | 0        | #NUM!    | #DIV/0!  | #DIV/0!  | 0.183722 | #DIV/0!  | 0.183722 |
| RP11-711K1.7__sen  | 2.1778   | 0        | 0.745253 | 5.7603   | 10.3872  | 200.636  | 0.650334 | 0.84225  | 0        | -6.21264 | 0.969664 | 7.182299 | 0.383232 | 0.564598 | 0.381379 |
| RP11-711K1.8__linc | 3.28519  | 0        | 1.82079  | 232.883  | 7.88303  | 9.26995  | 0.807282 | 3.62626  | 2.06113  | -5.6138  | -0.34707 | 5.266735 | 0.384781 | 0.817723 | 0.39452  |
| RP11-712B9.2__anti | 36.5066  | 4.87148  | 2.78372  | 31.2855  | 12.6799  | 145.198  | 4.55802  | 32.2182  | 8.58966  | -2.09876 | -0.03881 | 2.059953 | 0.413435 | 0.983625 | 0.409364 |
| RP11-712C7.1__linc | 0        | 0.069344 | 0.529825 | 0.26794  | 1.31119  | 73.1973  | 0.307973 | 0        | 0.149689 | -6.96348 | 0.38868  | 7.352157 | 0.410744 | 0.834659 | 0.412698 |
| RP11-713P17.3__lin | 0        | 0.183275 | 0        | 0.3344   | 0.542349 | 3.16263  | 0.326057 | 0.163471 | 0.131866 | -4.46205 | -1.7615  | 2.700553 | 0.304376 | 0.281948 | 0.353917 |
| RP11-714G18.1__ar  | 1.23945  | 1.75179  | 0.936344 | 3.36385  | 2.52863  | 8.00256  | 0.588015 | 1.00766  | 1.24658  | -1.82286 | 0.466606 | 2.289462 | 0.224373 | 0.395454 | 0.144673 |
| RP11-714L20.1__lin | 0        | 0        | 0.026374 | 0.122525 | 2.45147  | 4.06982  | 0.077499 | 0.043197 | 0.024044 | -7.97674 | -2.45626 | 5.520481 | 0.192289 | 0.230036 | 0.203094 |
| RP11-715J22.6__sei | 0        | 0        | 0        | 0.317219 | 0        | 0        | 0        | 0        | 0.348924 | #NUM!    | #NUM!    | -0.13743 | 0.42265  | 0.42265  | 0.961183 |
| RP11-717H13.1__lin | 0        | 0.006878 | 0.035068 | 0        | 0.050047 | 0.050439 | 0.028649 | 0        | 0.01909  | -1.26037 | -0.18661 | 1.073759 | 0.26244  | 0.900222 | 0.53603  |
| RP11-719N22.2__lin | 0        | 0        | 0        | 0        | 4.06837  | 1.44033  | 0        | 0        | 0        | #NUM!    | #DIV/0!  | #DIV/0!  | 0.263069 | #DIV/0!  | 0.263069 |
| RP11-71E19.1__linc | 0.230242 | 0        | 0.27453  | 0.105281 | 37.8675  | 20.1469  | 0        | 0.40908  | 0.211278 | -6.84725 | -0.29747 | 6.549782 | 0.222174 | 0.859112 | 0.217658 |
| RP11-71E19.2__linc | 0        | 0        | 0        | 0        | 0        | 0        | 0        | 0        | 0        | #DIV/0!  | #DIV/0!  | #DIV/0!  | #DIV/0!  | #DIV/0!  | #DIV/0!  |
| RP11-71E19.5__anti | 0        | 0.131909 | 0        | 0        | 0        | 0        | 0.408235 | 0        | 0        | #DIV/0!  | -1.62986 | #NUM!    | 0.42265  | 0.628134 | 0.42265  |
| RP11-71G7.1__lincR | 0        | 0        | 0.930648 | 0.161474 | 5.10683  | 17.7897  | 0.256327 | 0        | 0        | -4.63089 | 1.86025  | 6.491138 | 0.274805 | 0.596687 | 0.288727 |
| RP11-71H17.7__sen  | 0.512603 | 1.43566  | 0.29248  | 2.15169  | 0.262519 | 0.111944 | 0.252144 | 0.383289 | 0.20364  | -0.17296 | 1.417109 | 1.590074 | 0.918575 | 0.256034 | 0.488853 |
| RP11-71H9.1__lincR | 0.068233 | 0        | 0.543629 | 0        | 5.26999  | 189.602  | 0        | 0.147598 | 0        | -8.3151  | 2.051534 | 10.36664 | 0.406995 | 0.527617 | 0.407268 |
| RP11-71H9.2__lincR | 0        | 0        | 0        | 0        | 0.819867 | 1.80987  | 0.438616 | 0        | 0        | #NUM!    | #NUM!    | 2.583888 | 0.235859 | 0.42265  | 0.378279 |
| RP11-71J2.1__lincR | 0        | 0        | 0        | 0        | 5.80468  | 3.56664  | 0.059795 | 0        | 0        | #NUM!    | #NUM!    | 7.292093 | 0.205837 | 0.42265  | 0.210934 |

|                    |          |          |          |          |          |          |          |          |          |          |          |          |          |          |          |
|--------------------|----------|----------|----------|----------|----------|----------|----------|----------|----------|----------|----------|----------|----------|----------|----------|
| RP11-71N10.1__linc | 0        | 0        | 0.828622 | 0        | 0.956546 | 129.986  | 0.296392 | 0        | 0.197355 | -7.304   | 0.746942 | 8.050946 | 0.41839  | 0.722764 | 0.41973  |
| RP11-720L8.1__linc | 0.309896 | 0        | 0.028165 | 0        | 32.8713  | 15.2089  | 0.055077 | 0        | 0        | -7.15201 | 2.617769 | 9.769782 | 0.238749 | 0.362716 | 0.23446  |
| RP11-722P11.4__an  | 0        | 0        | 0.98579  | 0.049402 | 11.7375  | 20.938   | 0.219332 | 0.081541 | 0        | -5.05296 | 1.712125 | 6.76509  | 0.208397 | 0.609708 | 0.218839 |
| RP11-723G8.1__linc | 0        | 0        | 0        | 0        | 7.80557  | 0        | 0        | 0        | 0        | #NUM!    | #DIV/0!  | #DIV/0!  | 0.42265  | #DIV/0!  | 0.42265  |
| RP11-723O4.2__ant  | 0        | 0        | 0        | 0.330586 | 1.91652  | 1161.52  | 0.471281 | 0.307108 | 0        | #NUM!    | #NUM!    | 10.54602 | 0.421534 | 0.20108  | 0.42192  |
| RP11-725D20.1__lin | 0        | 0        | 0        | 0        | 1.19965  | 9.84922  | 0        | 0        | 0        | #NUM!    | #DIV/0!  | #DIV/0!  | 0.357079 | #DIV/0!  | 0.357079 |
| RP11-725M22.1__lin | 0        | 0        | 0        | 0        | 0        | 0        | 0        | 0        | 0        | #DIV/0!  | #DIV/0!  | #DIV/0!  | #DIV/0!  | #DIV/0!  | #DIV/0!  |
| RP11-726G1.1__pse  | 4.91822  | 0.089444 | 1.50037  | 1.85968  | 13.5965  | 7.09924  | 0.576465 | 0.131995 | 1.00595  | -1.79318 | 1.92451  | 3.71769  | 0.37977  | 0.366685 | 0.18889  |
| RP11-727A23.10__a  | 17.2403  | 4.6068   | 6.69136  | 3.13407  | 14.2549  | 95.9374  | 5.54523  | 8.52264  | 8.98115  | -1.9895  | 0.308202 | 2.297706 | 0.461279 | 0.747343 | 0.402126 |
| RP11-727A23.5__pri | 8.25616  | 3.25114  | 2.71138  | 11.483   | 2.03139  | 25.6659  | 1.11814  | 3.57697  | 3.20263  | -1.46234 | 0.848276 | 2.310616 | 0.379139 | 0.490473 | 0.271366 |
| RP11-727M10.1__ar  | 0        | 0        | 0        | 0        | 0        | 0.157477 | 0        | 0        | 0        | #NUM!    | #DIV/0!  | #DIV/0!  | 0.42265  | #DIV/0!  | 0.42265  |
| RP11-728E14.3__lin | 0.06277  | 0.018503 | 0.22793  | 0.104452 | 0.25223  | 0.982168 | 0.107845 | 0.034346 | 0.068439 | -2.11437 | 0.553844 | 2.668214 | 0.248197 | 0.65818  | 0.306568 |
| RP11-729M20.1__lin | 0        | 0        | 0.525763 | 0        | 20.317   | 21.5477  | 0        | 0        | 0        | -6.31518 | #DIV/0!  | #DIV/0!  | 0.183622 | 0.42265  | 0.183856 |
| RP11-72L22.1__linc | 0.265729 | 1.52782  | 0.740328 | 0        | 35.3643  | 211.197  | 1.00853  | 0.046002 | 0        | -6.60446 | 1.264743 | 7.869199 | 0.339043 | 0.529521 | 0.338056 |
| RP11-72M17.1__linc | 4.41224  | 3.35851  | 1.35216  | 115.868  | 33.3774  | 14.2177  | 2.76145  | 4.35739  | 19.3495  | -4.16333 | -1.5367  | 2.626625 | 0.232766 | 0.446733 | 0.323305 |
| RP11-730K11.1__an  | 7.31018  | 0.351833 | 0        | 0.34341  | 2.11007  | 16.0881  | 0.523998 | 0.154716 | 0.253218 | -1.27497 | 3.039427 | 4.314396 | 0.643506 | 0.428062 | 0.362821 |
| RP11-730N24.1__lin | 0        | 0        | 0.10422  | 0        | 0.222638 | 0.099676 | 0.01276  | 0        | 0        | -1.62884 | 3.029887 | 4.658723 | 0.43455  | 0.497094 | 0.268334 |
| RP11-730N24.2__lin | 0        | 0        | 0        | 0        | 0        | 0.365948 | 1.23749  | 0        | 0        | #NUM!    | #NUM!    | -1.75771 | 0.42265  | 0.42265  | 0.610075 |
| RP11-731J8.2__sen  | 0        | 0        | 0.046609 | 0        | 0.099494 | 0        | 0        | 0        | 0        | -1.09401 | #DIV/0!  | #DIV/0!  | 0.722096 | 0.42265  | 0.42265  |
| RP11-732A21.2__se  | 0        | 0.018192 | 0.061768 | 0.102428 | 0.082411 | 0        | 0.15121  | 0        | 0.033582 | -1.20892 | -1.20855 | 0.000365 | 0.553979 | 0.609232 | 0.999734 |
| RP11-733D4.1__linc | 0        | 0        | 0        | 0        | 3.27487  | 2.47363  | 0        | 0        | 0.051294 | #NUM!    | #NUM!    | 6.80826  | 0.191321 | 0.42265  | 0.192494 |
| RP11-734E19.1__ps  | 110.705  | 111.528  | 74.7985  | 96.7728  | 12.8787  | 1079.69  | 37.6755  | 195.323  | 213.425  | -2.00148 | -0.5878  | 1.413678 | 0.489833 | 0.514584 | 0.516563 |
| RP11-734K2.4__anti | 2.95597  | 3.65892  | 4.74969  | 7.39265  | 12.0936  | 14.7858  | 2.68425  | 14.3607  | 5.50892  | -1.59249 | -0.98883 | 0.603657 | 0.044405 | 0.398055 | 0.364593 |
| RP11-734K21.2__pri | 0        | 0        | 0        | 0        | 0        | 2.91095  | 0.873316 | 0        | 1.43998  | #NUM!    | #NUM!    | 0.33154  | 0.42265  | 0.20695  | 0.798294 |
| RP11-734K21.4__lin | 0        | 0        | 4.85786  | 0        | 0        | 0        | 0        | 0        | 0        | #DIV/0!  | #DIV/0!  | #DIV/0!  | 0.42265  | 0.42265  | #DIV/0!  |
| RP11-735B13.2__lin | 0        | 0        | 0        | 0        | 2.31785  | 0        | 0        | 0        | 0        | #NUM!    | #DIV/0!  | #DIV/0!  | 0.42265  | #DIV/0!  | 0.42265  |
| RP11-736K20.5__an  | 1.27937  | 4.91104  | 0.449192 | 4.504    | 11.3304  | 86.9931  | 1.25159  | 0        | 0.936591 | -3.95299 | 1.601365 | 5.55435  | 0.360512 | 0.47925  | 0.331061 |
| RP11-736K20.6__lin | 0.225269 | 0        | 0.55153  | 1.11314  | 2.48236  | 3.02753  | 1.05501  | 0.625247 | 0.220184 | -3.09188 | -1.29072 | 1.801157 | 0.066757 | 0.405104 | 0.190086 |
| RP11-736N17.4__ps  | 0        | 0.068068 | 0.057784 | 0.172519 | 4.7725   | 0.179518 | 0.056589 | 0.047315 | 0.09426  | -5.34763 | -0.65497 | 4.692656 | 0.387155 | 0.407406 | 0.398346 |
| RP11-739L10.1__an  | 8.51     | 7.30405  | 13.9404  | 4.31115  | 424.634  | 211.197  | 7.22881  | 11.5977  | 13.714   | -4.42721 | -0.12913 | 4.298084 | 0.236584 | 0.641468 | 0.233777 |
| RP11-739N10.1__lin | 0        | 0        | 0.86947  | 0        | 4.78492  | 337.008  | 0.067852 | 0        | 0        | -8.61877 | 3.679677 | 12.29845 | 0.41449  | 0.469319 | 0.414628 |
| RP11-739N20.2__an  | 20.2079  | 13.6104  | 20.7326  | 22.3854  | 10.3933  | 58.3635  | 9.35027  | 13.7648  | 14.0179  | -0.74052 | 0.554902 | 1.295418 | 0.441567 | 0.212332 | 0.327164 |
| RP11-73G16.1__pro  | 0.033428 | 0        | 0.122741 | 0.014818 | 2.44539  | 2.07447  | 0.098387 | 0        | 0        | -4.85982 | 0.666566 | 5.526384 | 0.192049 | 0.759773 | 0.201556 |
| RP11-73G16.2__linc | 0.73004  | 0        | 0.416616 | 0        | 4.58861  | 3.41756  | 0.492801 | 0        | 0        | -2.80368 | 1.218356 | 4.022035 | 0.283997 | 0.212596 | 0.244625 |
| RP11-73K9.2__antis | 0.147583 | 1.22361  | 0        | 0.078409 | 6.56255  | 0.098845 | 0.144678 | 0.177419 | 0.257052 | -2.29728 | 1.243425 | 3.5407   | 0.419589 | 0.57553  | 0.443148 |

|                    |          |          |          |          |          |          |          |          |          |          |          |          |          |          |          |         |
|--------------------|----------|----------|----------|----------|----------|----------|----------|----------|----------|----------|----------|----------|----------|----------|----------|---------|
| RP11-73M14.1__linc | 0.79693  | 0        | 0        | 0        | 0        | 0        | 0        | 0        | 0        | 0        | #DIV/0!  | #DIV/0!  | #DIV/0!  | 0.42265  | 0.42265  | #DIV/0! |
| RP11-73M7.6__antis | 6.95312  | 3.14874  | 5.25242  | 3.27726  | 2.4475   | 11.4379  | 2.21989  | 8.14436  | 9.1596   | -0.16063 | -0.3466  | -0.18596 | 0.85558  | 0.695804 | 0.781041 |         |
| RP11-740P5.2__linc | 0        | 0        | 0        | 0        | 0.189909 | 0.395551 | 0        | 0        | 0        | #NUM!    | #DIV/0!  | #DIV/0!  | 0.229643 | #DIV/0!  | 0.229643 |         |
| RP11-740P5.3__linc | 0        | 0        | 0        | 0        | 0        | 0        | 0        | 0        | 0        | #DIV/0!  | #DIV/0!  | #DIV/0!  | #DIV/0!  | #DIV/0!  | #DIV/0!  |         |
| RP11-742B18.1__an  | 1.00714  | 3.6692   | 1.44995  | 0.044411 | 10.3035  | 73.2715  | 0.142406 | 0        | 0.060821 | -3.77075 | 4.913853 | 8.684605 | 0.379754 | 0.148808 | 0.348588 |         |
| RP11-742D12.2__pr  | 0        | 0        | 0.384699 | 0        | 0.113813 | 23.0868  | 0.014916 | 0.049885 | 0.049689 | -5.91429 | 1.74851  | 7.662799 | 0.419763 | 0.539851 | 0.421424 |         |
| RP11-742N3.1__pse  | 155.349  | 350.41   | 101.425  | 88.8427  | 113.287  | 54.5096  | 79.6705  | 200.952  | 158.752  | 1.242392 | 0.466683 | -0.77571 | 0.192718 | 0.452823 | 0.227163 |         |
| RP11-744K17.1__lin | 0        | 0.028844 | 0.052083 | 0.032586 | 134.877  | 0.082247 | 0.042047 | 0        | 0.010006 | -10.704  | 0.636643 | 11.3406  | 0.422381 | 0.747832 | 0.422381 |         |
| RP11-744K17.2__lin | 0        | 0.018815 | 0.103897 | 0.074346 | 3.93239  | 0.084231 | 0.062663 | 0        | 0.026096 | -5.05909 | 0.467309 | 5.526403 | 0.414696 | 0.807163 | 0.412466 |         |
| RP11-744N12.3__an  | 0        | 0        | 0.236588 | 0.292917 | 8.3839   | 15.1765  | 0.479587 | 0        | 0.068598 | -6.65567 | -1.21229 | 5.443382 | 0.20421  | 0.645974 | 0.221308 |         |
| RP11-747H12.1__ps  | 0        | 0        | 0        | 0        | 0.057928 | 0        | 0        | 0        | 0        | #NUM!    | #DIV/0!  | #DIV/0!  | 0.42265  | #DIV/0!  | 0.42265  |         |
| RP11-748L13.6__lin | 0        | 0.157936 | 0.066977 | 0        | 13.9762  | 0        | 0.065531 | 0.024355 | 0        | -5.95746 | 1.323188 | 7.28065  | 0.425455 | 0.522228 | 0.425368 |         |
| RP11-749H17.1__se  | 0        | 0.048494 | 0.027447 | 0.036427 | 3.67733  | 7.60443  | 0.026882 | 0        | 0.155449 | -7.21954 | -1.2636  | 5.955938 | 0.227408 | 0.559667 | 0.226062 |         |
| RP11-749H20.1__lin | 0        | 0        | 0        | 0        | 0        | 30.4641  | 0        | 0        | 0        | #NUM!    | #DIV/0!  | #DIV/0!  | 0.42265  | #DIV/0!  | 0.42265  |         |
| RP11-74C13.3__anti | 0        | 0        | 0        | 0        | 10.3548  | 0        | 0        | 0        | 0        | #NUM!    | #DIV/0!  | #DIV/0!  | 0.42265  | #DIV/0!  | 0.42265  |         |
| RP11-74K19.1__linc | 0        | 0        | 0        | 0        | 0        | 0        | 0        | 0        | 0        | #DIV/0!  | #DIV/0!  | #DIV/0!  | #DIV/0!  | #DIV/0!  | #DIV/0!  |         |
| RP11-74M11.2__linc | 0        | 0        | 0        | 0        | 4.86345  | 44.9238  | 0        | 0        | 0        | #NUM!    | #DIV/0!  | #DIV/0!  | 0.363863 | #DIV/0!  | 0.363863 |         |
| RP11-750H9.5__anti | 2.02888  | 1.2825   | 1.65821  | 1.07995  | 7.72766  | 518.744  | 0.863015 | 1.24067  | 1.79275  | -6.73004 | 0.350972 | 7.081014 | 0.416559 | 0.472399 | 0.415209 |         |
| RP11-752D24.2__an  | 0        | 0        | 0.094462 | 0.062711 | 76.8907  | 16.3779  | 0.034702 | 0        | 0.012845 | -9.94841 | 0.990371 | 10.93878 | 0.315101 | 0.694588 | 0.314904 |         |
| RP11-752D24.3__lin | 0        | 0        | 0        | 0        | 3.46816  | 2.77409  | 0        | 0        | 0        | #NUM!    | #DIV/0!  | #DIV/0!  | 0.188504 | #DIV/0!  | 0.188504 |         |
| RP11-752G15.3__an  | 0        | 0.053332 | 3.02939  | 2.49077  | 11.6852  | 65.0583  | 0.882207 | 0        | 0.087021 | -4.68385 | 1.669297 | 6.353145 | 0.303885 | 0.602822 | 0.315704 |         |
| RP11-752G15.6__an  | 1.26121  | 1.92768  | 1.53207  | 1.89356  | 0.805997 | 1.53922  | 0.865586 | 0.964801 | 1.87546  | 0.155432 | 0.349277 | 0.193845 | 0.783804 | 0.465338 | 0.718535 |         |
| RP11-752G15.9__ps  | 0.435628 | 0.143327 | 0.505702 | 2.07412  | 0.816869 | 3.72894  | 1.03966  | 1.16773  | 0.124687 | -2.60958 | -1.10438 | 1.5052   | 0.131103 | 0.423274 | 0.342672 |         |
| RP11-752L20.5__lin | 0        | 0        | 0.395431 | 0.083526 | 2.50894  | 16.036   | 0.475729 | 0        | 0        | -5.55794 | -0.26671 | 5.291225 | 0.335457 | 0.925058 | 0.354484 |         |
| RP11-753A21.2__an  | 0        | 0        | 0.272924 | 0        | 0.260726 | 3.45859  | 0.527874 | 0.047048 | 0        | -3.76847 | -1.07487 | 2.693599 | 0.377479 | 0.707508 | 0.482073 |         |
| RP11-753H16.5__an  | 14.2515  | 3.21962  | 8.95371  | 7.10825  | 8.66008  | 118.169  | 1.6457   | 3.61356  | 4.18527  | -2.34159 | 1.484343 | 3.825935 | 0.433562 | 0.272909 | 0.370757 |         |
| RP11-753N8.1__linc | 0.222062 | 0.08738  | 0.323289 | 0        | 0        | 0        | 0.206338 | 0        | 0        | #DIV/0!  | 1.616582 | #NUM!    | 0.090878 | 0.265707 | 0.42265  |         |
| RP11-754N21.1__lin | 0        | 0        | 0.02493  | 0        | 0        | 273.55   | 0.073153 | 0        | 0        | -13.4216 | -1.55304 | 11.8686  | 0.42265  | 0.639751 | 0.422804 |         |
| RP11-756H6.1__linc | 1.26401  | 1.01462  | 0        | 0        | 0        | 1.62592  | 0.566155 | 0.592562 | 1.40573  | 0.48691  | -0.17048 | -0.65739 | 0.835857 | 0.898463 | 0.361477 |         |
| RP11-756P10.2__lin | 0        | 0        | 0        | 0        | 0        | 3.30925  | 0        | 0        | 0        | #NUM!    | #DIV/0!  | #DIV/0!  | 0.42265  | #DIV/0!  | 0.42265  |         |
| RP11-756P10.4__lin | 0        | 0.053904 | 0.410374 | 0        | 3.89476  | 0        | 0        | 0        | 0        | -3.06847 | #DIV/0!  | #DIV/0!  | 0.487255 | 0.352376 | 0.42265  |         |
| RP11-757G1.6__linc | 0.107816 | 0.105941 | 0.071993 | 0.155432 | 0.111883 | 0.060334 | 0.127872 | 0.127793 | 0.16649  | -0.1974  | -0.56302 | -0.36562 | 0.510124 | 0.204853 | 0.507657 |         |
| RP11-75L1.1__lincR | 0.201258 | 0        | 0        | 0        | 0        | 0        | 0.065033 | 0        | 0        | #DIV/0!  | 1.629793 | #NUM!    | 0.42265  | 0.42265  | 0.42265  |         |
| RP11-75N4.2__antis | 0        | 0        | 0        | 0        | 0        | 2.73351  | 0        | 0        | 0        | #NUM!    | #DIV/0!  | #DIV/0!  | 0.42265  | #DIV/0!  | 0.42265  |         |
| RP11-760N9.1__linc | 0.132196 | 0        | 0.404007 | 0        | 0.502328 | 2.1207   | 0.201593 | 0.064211 | 0.239849 | -2.29038 | 0.08463  | 2.375012 | 0.328246 | 0.906894 | 0.370413 |         |

|                     |          |          |          |          |          |          |          |          |          |          |          |          |          |          |          |
|---------------------|----------|----------|----------|----------|----------|----------|----------|----------|----------|----------|----------|----------|----------|----------|----------|
| RP11-761I4.3__antis | 1.38114  | 0.762677 | 4.26093  | 2.09457  | 5.02562  | 24.788   | 19.0961  | 0        | 0.817021 | -2.31671 | -1.63651 | 0.680207 | 0.298075 | 0.568223 | 0.76772  |
| RP11-761N21.1__lin  | 0.765655 | 0        | 0        | 0        | 4.13393  | 32.5291  | 0.909638 | 6.1276   | 0.336418 | -5.58149 | -3.26761 | 2.313874 | 0.368123 | 0.378493 | 0.475931 |
| RP11-763B22.9__ps   | 1.56291  | 0.142701 | 1.63797  | 1.10854  | 2.84057  | 15.1115  | 1.99619  | 0        | 1.06494  | -2.51113 | 0.12733  | 2.638458 | 0.339983 | 0.777354 | 0.35666  |
| RP11-763K15.1__lin  | 0        | 0        | 0.403415 | 0        | 0.591576 | 3.81561  | 0        | 0        | 0        | -3.44952 | #DIV/0!  | #DIV/0!  | 0.332511 | 0.42265  | 0.34101  |
| RP11-764E7.1__linc  | 0        | 0        | 0        | 0.170102 | 0        | 0.336238 | 0.062897 | 0.035071 | 0        | #NUM!    | #NUM!    | 2.369717 | 0.224197 | 0.21457  | 0.3352   |
| RP11-766N7.3__linc  | 0.083175 | 0        | 0.027802 | 0.180803 | 0.327638 | 1161.52  | 0.108644 | 0.08111  | 0.132097 | -13.3541 | -1.53614 | 11.81797 | 0.422438 | 0.095176 | 0.422491 |
| RP11-766N7.4__linc  | 0        | 0.058647 | 2.08406  | 0.032913 | 2.21647  | 207.45   | 0.760767 | 0        | 0.054004 | -6.61274 | 1.394968 | 8.007712 | 0.416523 | 0.64648  | 0.418542 |
| RP11-767C1.1__linc  | 0        | 0        | 0        | 0        | 1.10616  | 2.67548  | 0.199605 | 0        | 0.214555 | #NUM!    | #NUM!    | 3.190752 | 0.245861 | 0.184035 | 0.281377 |
| RP11-767I20.1__linc | 1.61036  | 0        | 2.25752  | 1.89644  | 25.5815  | 35.2792  | 0.194326 | 0        | 0.066396 | -4.02016 | 3.890959 | 7.911123 | 0.18607  | 0.201724 | 0.171615 |
| RP11-767N15.1__lin  | 0        | 0        | 0.484786 | 0        | 7.13885  | 58.607   | 0.33631  | 0        | 0.139992 | -7.08341 | 0.025471 | 7.108879 | 0.356572 | 0.98983  | 0.360238 |
| RP11-768B22.2__an   | 0.012539 | 0        | 0.025109 | 0        | 0.214581 | 7.44964  | 4.84969  | 0.191926 | 4.98466  | -7.66945 | -8.05703 | -0.38757 | 0.407187 | 0.167892 | 0.749324 |
| RP11-768F21.1__lin  | 2.89988  | 9.25806  | 3.08166  | 5.28723  | 100.521  | 148.178  | 5.11514  | 12.7245  | 6.88004  | -4.05885 | -0.69784 | 3.361018 | 0.195928 | 0.022484 | 0.204301 |
| RP11-769N22.1__lin  | 0        | 0        | 0.076545 | 0        | 0.330533 | 9.67784  | 0.143599 | 0.031324 | 0.062393 | -7.03069 | -1.63243 | 5.398254 | 0.403128 | 0.371365 | 0.413655 |
| RP11-76C10.2__linc  | 0        | 0        | 1.10878  | 0        | 0        | 4.47248  | 0        | 0        | 0        | -2.0121  | #DIV/0!  | #DIV/0!  | 0.42265  | 0.42265  | 0.42265  |
| RP11-76C10.5__linc  | 0        | 0        | 0        | 0        | 0        | 0        | 0        | 0        | 0        | #DIV/0!  | #DIV/0!  | #DIV/0!  | #DIV/0!  | #DIV/0!  | #DIV/0!  |
| RP11-76E12.1__linc  | 0        | 0.035525 | 0        | 0.039801 | 24.3852  | 6.40778  | 0        | 0        | 0        | -9.76142 | #DIV/0!  | #DIV/0!  | 0.293816 | 0.42265  | 0.293965 |
| RP11-76I14.1__lincF | 0        | 0.080056 | 9.28708  | 4.26421  | 36.0883  | 167.196  | 1.69551  | 0.097867 | 0.147517 | -4.4697  | 2.270887 | 6.740584 | 0.293784 | 0.538752 | 0.305401 |
| RP11-76N22.2__anti  | 11.1538  | 10.3472  | 13.0105  | 5.51348  | 22.2062  | 337.008  | 6.35444  | 15.4744  | 15.0457  | -3.40167 | -0.09555 | 3.306123 | 0.412051 | 0.813414 | 0.412217 |
| RP11-770J1.3__anti  | 7.64319  | 0.446257 | 0.751252 | 0.781623 | 0.4858   | 3.54168  | 0.742402 | 0.505145 | 0.57305  | 0.878393 | 2.279749 | 1.401356 | 0.685767 | 0.412884 | 0.418847 |
| RP11-771K4.1__linc  | 0.154231 | 0.045488 | 0.154039 | 0.406528 | 2.297    | 15.4454  | 0.075213 | 0.083888 | 0        | -5.68098 | 1.152827 | 6.833803 | 0.33537  | 0.366238 | 0.334487 |
| RP11-773D16.1__lin  | 1.06643  | 859.265  | 0.338213 | 34.5258  | 5.07001  | 95.0374  | 0.644932 | 8.17378  | 0        | 2.676425 | 6.608748 | 3.932323 | 0.512629 | 0.422134 | 0.280401 |
| RP11-774D14.1__lin  | 27.38    | 24.1647  | 9.58539  | 23.3258  | 19.4659  | 129.986  | 7.85293  | 2.23917  | 8.42779  | -1.49896 | 1.722807 | 3.22177  | 0.465332 | 0.162754 | 0.280282 |
| RP11-774I5.1__lincF | 0        | 0        | 0        | 0        | 0        | 0        | 0        | 0        | 0        | #DIV/0!  | #DIV/0!  | #DIV/0!  | #DIV/0!  | #DIV/0!  | #DIV/0!  |
| RP11-774O3.1__linc  | 0        | 0        | 1.01099  | 0.687684 | 2.48161  | 4.12455  | 0.9931   | 0        | 0.815393 | -2.85091 | -0.83902 | 2.011891 | 0.102236 | 0.545102 | 0.236425 |
| RP11-774O3.3__linc  | 1.06461  | 0.102792 | 0.319957 | 0.231574 | 2.41728  | 2.26878  | 0.702738 | 0.913153 | 0.205606 | -1.72521 | -0.29237 | 1.43284  | 0.368929 | 0.784411 | 0.311515 |
| RP11-775C24.3__lin  | 0.038533 | 0.045438 | 0.09002  | 0.119494 | 2.86999  | 13.1945  | 0.088176 | 0        | 0.013988 | -6.53942 | 0.76812  | 7.307536 | 0.310488 | 0.59159  | 0.311693 |
| RP11-775H9.1__linc  | 0        | 0        | 0        | 0        | 0.243261 | 0        | 0        | 0        | 0        | #NUM!    | #DIV/0!  | #DIV/0!  | 0.42265  | #DIV/0!  | 0.42265  |
| RP11-775H9.3__linc  | 0        | 0        | 0.043038 | 0        | 0.045856 | 0        | 0        | 0        | 0.02338  | -0.0915  | 0.880333 | 0.971833 | 0.97413  | 0.42265  | 0.747894 |
| RP11-776A13.1__lin  | 0        | 0        | 0        | 0.170783 | 3.79214  | 3.081    | 0.561286 | 0        | 0        | #NUM!    | #NUM!    | 3.649571 | 0.168167 | 0.42265  | 0.236418 |
| RP11-776A13.3__lin  | 0        | 0        | 0.397119 | 0.610204 | 3.86538  | 3.7189   | 0.419685 | 0        | 2.43324  | -4.36701 | -2.8448  | 1.522211 | 0.122968 | 0.317984 | 0.243766 |
| RP11-776H12.1__lin  | 13.3022  | 10.9319  | 17.2768  | 8.32881  | 27.9071  | 79.538   | 16.5623  | 158.676  | 20.338   | -1.47975 | -2.23617 | -0.75642 | 0.337572 | 0.398223 | 0.679554 |
| RP11-777N19.1__lin  | 0        | 0        | 0.067462 | 0        | 0        | 0        | 0        | 0        | 0        | #DIV/0!  | #DIV/0!  | #DIV/0!  | 0.42265  | 0.42265  | #DIV/0!  |
| RP11-778D9.4__pse   | 59.1301  | 7.64109  | 6.15492  | 29.2209  | 31.2773  | 47.0843  | 11.4932  | 11.6648  | 7.0586   | -0.56094 | 1.271094 | 1.83203  | 0.642267 | 0.484298 | 0.068822 |
| RP11-778J15.1__an   | 0        | 0.283552 | 0        | 0        | 12.9984  | 13.8596  | 0        | 0        | 2.60565  | -6.56559 | -3.19996 | 3.365637 | 0.18426  | 0.488498 | 0.185607 |
| RP11-778J16.3__linc | 0        | 0        | 0.301036 | 0        | 1.21609  | 0.279184 | 0        | 0        | 0        | -2.3124  | #DIV/0!  | #DIV/0!  | 0.433116 | 0.42265  | 0.308103 |

|                     |          |          |          |          |          |          |          |          |          |          |          |          |          |          |          |
|---------------------|----------|----------|----------|----------|----------|----------|----------|----------|----------|----------|----------|----------|----------|----------|----------|
| RP11-778O17.4__ar   | 0        | 0        | 0.574155 | 3.16285  | 8.46154  | 3.32781  | 0.510565 | 0        | 1.63784  | -4.70277 | -1.90375 | 2.79902  | 0.120986 | 0.229669 | 0.181101 |
| RP11-779P15.1__lin  | 0        | 0        | 0        | 0        | 0        | 4.37362  | 0.257226 | 0        | 0        | #NUM!    | #NUM!    | 4.087719 | 0.42265  | 0.42265  | 0.457543 |
| RP11-779P15.2__lin  | 0        | 0        | 0.172821 | 0        | 2.2012   | 2.58435  | 0        | 0        | 0.186175 | -4.79133 | -0.10738 | 4.683953 | 0.184351 | 0.42265  | 0.184251 |
| RP11-77C3.3__antis  | 5.20733  | 0.074523 | 0.221522 | 0.224161 | 7.58354  | 47.3297  | 0.299727 | 8.49461  | 0.218074 | -3.32464 | -0.7116  | 2.613046 | 0.402528 | 0.792123 | 0.434847 |
| RP11-77I22.2__lincF | 0        | 0        | 0.099207 | 0        | 2.57862  | 16.4196  | 0.475528 | 0        | 0        | -7.5812  | -2.26101 | 5.32019  | 0.33962  | 0.55273  | 0.356849 |
| RP11-77K12.8__pro   | 14.0239  | 21.4957  | 7.57627  | 5.6716   | 9.36668  | 94.0933  | 8.42065  | 12.2966  | 14.005   | -1.34045 | 0.311689 | 1.652136 | 0.565575 | 0.614591 | 0.464263 |
| RP11-77P16.4__linc  | 2.29886  | 0.260463 | 0.228767 | 25.6584  | 0.201595 | 0.170719 | 0.752823 | 1.75524  | 0        | -3.22287 | 0.152704 | 3.375569 | 0.425543 | 0.925242 | 0.455779 |
| RP11-77P6.2__antis  | 0.841497 | 0        | 0        | 0        | 0.117672 | 17.1711  | 0.691409 | 0        | 0        | -4.36073 | 0.283419 | 4.644152 | 0.447663 | 0.42265  | 0.442406 |
| RP11-780O17.1__lin  | 0        | 0.156858 | 0.330932 | 0        | 0.417696 | 2.21292  | 0.128846 | 0        | 0        | -2.43107 | 1.920612 | 4.351681 | 0.348855 | 0.466201 | 0.359662 |
| RP11-781M16.2__ar   | 0        | 0        | 0        | 0.284259 | 0        | 4.94327  | 0        | 0        | 0        | #NUM!    | #DIV/0!  | #DIV/0!  | 0.390457 | #DIV/0!  | 0.390457 |
| RP11-781P6.1__anti  | 0        | 0        | 0        | 0        | 7.22611  | 15.2575  | 0        | 0        | 0        | #NUM!    | #DIV/0!  | #DIV/0!  | 0.231088 | #DIV/0!  | 0.231088 |
| RP11-782C8.1__linc  | 0.662714 | 0.020211 | 0.994997 | 3.03433  | 16.5437  | 579.152  | 1.5197   | 2.25357  | 1.45764  | -8.47909 | -1.64039 | 6.8387   | 0.404029 | 0.158075 | 0.407038 |
| RP11-783K16.10__p   | 4.30792  | 2.8773   | 4.33799  | 3.60681  | 6.78149  | 2.78654  | 2.22917  | 5.67273  | 4.18488  | -0.19324 | -0.06889 | 0.124355 | 0.776118 | 0.906688 | 0.721356 |
| RP11-783K16.14__a   | 7.96988  | 6.52537  | 5.19411  | 3.32668  | 4.32652  | 5.23961  | 2.4514   | 5.04289  | 5.30856  | 0.610849 | 0.620951 | 0.010102 | 0.236241 | 0.304334 | 0.954165 |
| RP11-783K16.5__an   | 13.1357  | 6.56378  | 6.33726  | 6.57459  | 1.52864  | 1.88544  | 3.94514  | 5.04883  | 4.57724  | 1.382184 | 0.939999 | -0.44218 | 0.013539 | 0.240778 | 0.598592 |
| RP11-785G17.1__ar   | 0        | 0        | 0        | 0        | 0.665516 | 2.24236  | 0.544606 | 0        | 0        | #NUM!    | #NUM!    | 2.416681 | 0.282242 | 0.42265  | 0.431865 |
| RP11-785H5.2__sen   | 31.1387  | 16.1187  | 5.19398  | 17.7346  | 5.98831  | 1.76145  | 9.94283  | 12.3758  | 11.5686  | 1.041369 | 0.630239 | -0.41113 | 0.092092 | 0.522539 | 0.654958 |
| RP11-788H18.1__lin  | 0        | 0        | 0        | 0        | 0        | 0        | 0        | 0        | 0        | #DIV/0!  | #DIV/0!  | #DIV/0!  | #DIV/0!  | #DIV/0!  | #DIV/0!  |
| RP11-789C1.1__linc  | 0        | 0        | 0.296576 | 0        | 0.500096 | 0        | 0.231127 | 0.064472 | 0        | -0.7538  | 0.004759 | 0.758562 | 0.797906 | 0.998522 | 0.760583 |
| RP11-789C1.2__linc  | 0.48774  | 16.5836  | 0.096874 | 0        | 3.27574  | 1.833    | 0.187908 | 1.9049   | 0.416874 | 1.748701 | 2.774163 | 1.025463 | 0.481548 | 0.4237   | 0.242092 |
| RP11-789C17.3__an   | 0        | 0        | 0        | 0        | 0        | 4.06982  | 1.31729  | 0        | 0        | #NUM!    | #NUM!    | 1.627392 | 0.42265  | 0.42265  | 0.628498 |
| RP11-789C2.1__linc  | 0.274677 | 0.150409 | 1.18472  | 0        | 4.93823  | 15.9446  | 0.262367 | 0        | 0.137191 | -3.69736 | 2.01041  | 5.707768 | 0.283009 | 0.339783 | 0.285993 |
| RP11-789F5.1__linc  | 0        | 0        | 0        | 0        | 0.052461 | 0.328025 | 0        | 0        | 0        | #NUM!    | #DIV/0!  | #DIV/0!  | 0.338718 | #DIV/0!  | 0.338718 |
| RP11-78A18.2__anti  | 3.95574  | 4.58778  | 3.99682  | 4.40805  | 0        | 3.07243  | 0.680381 | 3.10589  | 7.92994  | 0.745374 | 0.09807  | -0.6473  | 0.378681 | 0.910705 | 0.643808 |
| RP11-78B10.2__anti  | 0        | 0        | 0        | 0        | 297.264  | 12.7069  | 0        | 0        | 0        | #NUM!    | #DIV/0!  | #DIV/0!  | 0.398519 | #DIV/0!  | 0.398519 |
| RP11-78C3.1__lincR  | 0        | 0.109602 | 0        | 0        | 2.58964  | 0        | 0.69714  | 1.92552  | 2.54433  | -4.56241 | -5.55898 | -0.99657 | 0.42265  | 0.088301 | 0.453013 |
| RP11-78F17.1__linc  | 0.38551  | 0        | 1.14513  | 0.164547 | 45.4449  | 1161.52  | 0        | 0.612404 | 0        | -9.62323 | 1.321579 | 10.94481 | 0.400608 | 0.608639 | 0.40073  |
| RP11-78O22.1__linc  | 0        | 0        | 0        | 0        | 0        | 302.91   | 0        | 0        | 0        | #NUM!    | #DIV/0!  | #DIV/0!  | 0.42265  | #DIV/0!  | 0.42265  |
| RP11-78O9.1__antis  | 0        | 0        | 0        | 0        | 0        | 0        | 0.512508 | 0        | 0        | #DIV/0!  | #NUM!    | #NUM!    | #DIV/0!  | 0.42265  | 0.42265  |
| RP11-792D21.2__lin  | 1.26073  | 0.526638 | 0.650982 | 0.175882 | 7.26683  | 5.71897  | 0.293326 | 0.318784 | 0.534818 | -2.43237 | 1.08813  | 3.520497 | 0.271843 | 0.251611 | 0.199894 |
| RP11-793B23.1__lin  | 0        | 0        | 0        | 0        | 0        | 0        | 0        | 0        | 0        | #DIV/0!  | #DIV/0!  | #DIV/0!  | #DIV/0!  | #DIV/0!  | #DIV/0!  |
| RP11-793H13.3__an   | 0        | 0        | 0        | 0        | 0        | 0        | 0        | 0        | 0        | #DIV/0!  | #DIV/0!  | #DIV/0!  | #DIV/0!  | #DIV/0!  | #DIV/0!  |
| RP11-794M8.1__ant   | 0        | 0.019381 | 0.246735 | 0        | 0.105311 | 5.16898  | 0.016105 | 0.053865 | 0.071534 | -4.30885 | 0.911208 | 5.220058 | 0.41266  | 0.598719 | 0.418679 |
| RP11-794P6.1__sen   | 0.02286  | 0.013478 | 0.137348 | 0        | 0.5131   | 1.64302  | 0.505717 | 0        | 0.037356 | -3.63388 | -1.64466 | 1.989218 | 0.278594 | 0.567663 | 0.47082  |
| RP11-794P6.6__anti  | 0        | 0        | 0.414148 | 0.109575 | 4.50668  | 0.761797 | 0.109386 | 0        | 0.239789 | -3.69887 | 0.246196 | 3.945062 | 0.366145 | 0.817752 | 0.36003  |



|                     |          |          |          |          |          |          |          |          |          |          |          |          |          |          |          |
|---------------------|----------|----------|----------|----------|----------|----------|----------|----------|----------|----------|----------|----------|----------|----------|----------|
| RP11-795H16.3__lin  | 0        | 0        | 0        | 0        | 4.70497  | 4.74695  | 0        | 0        | 0        | #NUM!    | #DIV/0!  | #DIV/0!  | 0.183511 | #DIV/0!  | 0.183511 |
| RP11-796E2.4__anti  | 18.7809  | 8.49275  | 9.06681  | 4.55108  | 2.1652   | 15.261   | 2.61807  | 10.2372  | 7.41328  | 0.725564 | 0.842334 | 0.11677  | 0.505212 | 0.432142 | 0.913635 |
| RP11-796G6.1__pse   | 4.28774  | 12.9853  | 18.1945  | 4.17012  | 0        | 6.91132  | 1.71246  | 3.32386  | 2.57576  | 1.678354 | 2.220137 | 0.541783 | 0.181576 | 0.132797 | 0.665627 |
| RP11-798G7.5__ant   | 3.8966   | 0.22412  | 2.85214  | 7.33595  | 8.62897  | 5.17552  | 0.30756  | 0.248768 | 4.2767   | -1.60018 | 0.528823 | 2.129006 | 0.127395 | 0.680064 | 0.142074 |
| RP11-798K3.2__linc  | 1.43729  | 0        | 2.53501  | 0.178435 | 136.332  | 32.271   | 0.506432 | 0.037197 | 0.172834 | -5.40904 | 2.47101  | 7.880048 | 0.318112 | 0.259717 | 0.30703  |
| RP11-798K3.3__linc  | 0.076873 | 0        | 0        | 0        | 8.84081  | 142.556  | 0.606069 | 0.0823   | 0.082512 | -10.9436 | -3.32595 | 7.617612 | 0.388331 | 0.260559 | 0.390769 |
| RP11-798M19.3__ar   | 0.839306 | 2.71181  | 0.586314 | 0.079447 | 1.55411  | 12.9739  | 1.07815  | 0.885264 | 4.84226  | -1.8199  | -0.718   | 1.101895 | 0.515043 | 0.667814 | 0.452024 |
| RP11-798M19.6__ar   | 3.31262  | 2.11579  | 2.51621  | 0.841477 | 0.061499 | 0.642725 | 0.904818 | 0.819803 | 2.07191  | 2.361717 | 1.065296 | -1.29642 | 0.006813 | 0.135505 | 0.197402 |
| RP11-799D4.4__anti  | 0.2232   | 0.268436 | 0.205855 | 0.249253 | 0.502328 | 1.88928  | 0.230393 | 0.997882 | 0.145666 | -1.92076 | -0.97807 | 0.942688 | 0.339917 | 0.466435 | 0.596497 |
| RP11-799N11.1__an   | 0.156863 | 0.03925  | 0.705212 | 0.500776 | 5.35168  | 40.2585  | 0.223427 | 1.21912  | 0.156203 | -5.67692 | -0.82682 | 4.850093 | 0.345983 | 0.690987 | 0.362551 |
| RP11-799P8.1__linc  | 0        | 0        | 0        | 0        | 0.684934 | 2.36748  | 0.222479 | 0.042233 | 0        | #NUM!    | #NUM!    | 3.527454 | 0.284941 | 0.325104 | 0.346599 |
| RP11-79C6.3__antis  | 0        | 0        | 0        | 0        | 0        | 6.04796  | 1.51072  | 0        | 0        | #NUM!    | #NUM!    | 2.001212 | 0.42265  | 0.42265  | 0.579778 |
| RP11-79E3.2__lincR  | 0.015217 | 0        | 1.37956  | 0.131622 | 21.1662  | 51.5045  | 0.067637 | 0        | 0.10785  | -5.70588 | 2.990598 | 8.696476 | 0.242298 | 0.446918 | 0.245632 |
| RP11-79P5.5__antis  | 0        | 0.051784 | 0.043813 | 0        | 4.93245  | 3.3344   | 0.635927 | 0        | 0        | -6.43422 | -2.73382 | 3.700405 | 0.198537 | 0.512209 | 0.264197 |
| RP11-7F17.5__lincR  | 0.144306 | 0.463054 | 0.751689 | 1.17089  | 59.5737  | 94.0933  | 0.593017 | 0.054699 | 0.142301 | -6.83202 | 0.782641 | 7.614658 | 0.198009 | 0.617949 | 0.200319 |
| RP11-7O11.3__antis  | 0        | 0        | 0.482536 | 2.02502  | 0.084989 | 2.05435  | 1.11703  | 0.920055 | 0        | -3.10939 | -2.0778  | 1.031588 | 0.171223 | 0.411649 | 0.487462 |
| RP11-802H3.2__linc  | 0        | 0        | 0        | 0        | 2.03439  | 0        | 0        | 0        | 0        | #NUM!    | #DIV/0!  | #DIV/0!  | 0.42265  | #DIV/0!  | 0.42265  |
| RP11-803B1.8__linc  | 0.207493 | 0.181683 | 0        | 0.683451 | 4.39515  | 0        | 0.67238  | 0.432647 | 0.213429 | -3.70594 | -1.76035 | 1.945582 | 0.361492 | 0.058381 | 0.452929 |
| RP11-804A23.4__an   | 3.2161   | 1.8655   | 5.56488  | 3.88495  | 1.43532  | 8.95383  | 1.98963  | 4.24046  | 5.68589  | -0.42302 | -0.16252 | 0.260502 | 0.398333 | 0.726072 | 0.710658 |
| RP11-804F13.1__lin  | 0        | 0        | 0        | 0        | 1.6602   | 3.44522  | 1.48554  | 0        | 0        | #NUM!    | #NUM!    | 1.781042 | 0.229255 | 0.42265  | 0.490602 |
| RP11-804N13.1__an   | 0        | 0.046648 | 5.25702  | 14.7819  | 3.5049   | 153.62   | 1.31158  | 0        | 0        | -5.01849 | 2.015685 | 7.034177 | 0.355036 | 0.574626 | 0.361467 |
| RP11-805I24.1__linc | 0        | 0.049334 | 0.054508 | 0.050193 | 1.23872  | 0.257461 | 0.081069 | 0        | 0.050226 | -3.89643 | -0.33842 | 3.558014 | 0.310341 | 0.833153 | 0.349688 |
| RP11-805I24.3__linc | 0        | 0        | 1.14449  | 0.763952 | 1.466    | 0        | 0        | 1.72137  | 1.49777  | -0.96231 | -1.49197 | -0.52966 | 0.688311 | 0.318366 | 0.664179 |
| RP11-806H10.4__lin  | 11.2126  | 1.37301  | 4.25395  | 4.00053  | 2.30599  | 6.92982  | 1.03667  | 4.7993   | 12.1936  | 0.34735  | -0.09851 | -0.44586 | 0.731532 | 0.94855  | 0.576542 |
| RP11-806K15.1__an   | 0        | 0        | 0        | 0        | 0        | 162.996  | 0        | 0        | 0        | #NUM!    | #DIV/0!  | #DIV/0!  | 0.42265  | #DIV/0!  | 0.42265  |
| RP11-807H22.7__an   | 6.42104  | 0.084012 | 0.402826 | 0.628332 | 2.62666  | 11.4301  | 0.562435 | 0.310058 | 2.85483  | -1.08804 | 0.890103 | 1.978141 | 0.646805 | 0.71105  | 0.287794 |
| RP11-807H7.1__linc  | 0        | 0        | 0.162221 | 0.107314 | 2.96973  | 1.91012  | 0.241401 | 0        | 0        | -4.94219 | -0.57347 | 4.368716 | 0.191994 | 0.842821 | 0.224581 |
| RP11-807H7.2__linc  | 0        | 0        | 0        | 0        | 0        | 0        | 0        | 0        | 0        | #DIV/0!  | #DIV/0!  | #DIV/0!  | #DIV/0!  | #DIV/0!  | #DIV/0!  |
| RP11-809C18.3__an   | 0.018765 | 0        | 0        | 5.60339  | 0        | 5.477    | 0.073517 | 0.040982 | 0        | -9.20579 | -2.60926 | 6.596522 | 0.183542 | 0.191821 | 0.186564 |
| RP11-809C9.2__linc  | 0.22042  | 0        | 1.17468  | 0.32426  | 0.760265 | 1.53114  | 0.287507 | 0.180103 | 0.239415 | -0.90681 | 0.980535 | 1.887345 | 0.167107 | 0.583937 | 0.222063 |
| RP11-809F4.3__linc  | 0.02858  | 0        | 0.057223 | 0        | 0.336036 | 0.519676 | 0.112082 | 0        | 0.062231 | -3.31803 | -1.02258 | 2.295447 | 0.223383 | 0.38912  | 0.320033 |
| RP11-80B9.4__lincR  | 0        | 0        | 0        | 0        | 4.05847  | 0        | 0.067428 | 0        | 0        | #NUM!    | #NUM!    | 5.911436 | 0.42265  | 0.42265  | 0.43232  |
| RP11-80F22.15__lin  | 0        | 0        | 0.182986 | 0        | 0        | 0        | 0.086011 | 0        | 0        | #DIV/0!  | 1.089147 | #NUM!    | 0.42265  | 0.723091 | 0.42265  |
| RP11-80F22.9__pse   | 0.01958  | 0        | 0.097958 | 0.103863 | 0.229746 | 0.149547 | 0.03835  | 0        | 0.106457 | -2.03937 | -0.301   | 1.738361 | 0.155967 | 0.2359   | 0.195309 |
| RP11-80H5.6__lincR  | 0        | 0.147091 | 0        | 0        | 0        | 3.37906  | 0.823982 | 0.192613 | 0        | -4.52184 | -2.78896 | 1.732877 | 0.448304 | 0.391681 | 0.608437 |

|                     |          |          |          |          |          |          |          |          |          |          |          |          |          |          |          |
|---------------------|----------|----------|----------|----------|----------|----------|----------|----------|----------|----------|----------|----------|----------|----------|----------|
| RP11-80H5.9__lincR  | 1.29456  | 0.734417 | 0.266128 | 1.58604  | 6.68167  | 3.49055  | 0.703703 | 0.352279 | 4.9073   | -2.35704 | -1.37755 | 0.979496 | 0.193141 | 0.548844 | 0.48887  |
| RP11-80H8.4__lincR  | 0.845798 | 0.147653 | 0.485915 | 0.269125 | 3.34997  | 337.008  | 0.118577 | 0.843001 | 0.335935 | -7.84707 | 0.18923  | 8.0363   | 0.418172 | 0.89679  | 0.418109 |
| RP11-80K21.3__linc  | 0        | 0        | 0.043205 | 0        | 25.5815  | 67.5989  | 0        | 0        | 0        | -11.0746 | #DIV/0!  | #DIV/0!  | 0.255606 | 0.42265  | 0.255677 |
| RP11-80K6.2__lincR  | 0        | 0        | 0        | 0        | 1.1742   | 7.81259  | 0        | 0        | 0        | #NUM!    | #DIV/0!  | #DIV/0!  | 0.343253 | #DIV/0!  | 0.343253 |
| RP11-810P8.1__linc  | 0        | 0        | 0.165661 | 0.072587 | 1.01     | 267.514  | 0        | 0        | 0        | -10.663  | #DIV/0!  | #DIV/0!  | 0.420316 | 0.42265  | 0.420317 |
| RP11-814P5.1__anti  | 0.031473 | 0.027833 | 2.16474  | 0.219483 | 14.8553  | 95.6924  | 0.165986 | 0.034443 | 0.145841 | -5.6382  | 2.683218 | 8.321418 | 0.338225 | 0.464198 | 0.340655 |
| RP11-815J4.6__pse   | 1.79203  | 3.9765   | 2.1765   | 28.8757  | 1.54446  | 1.4255   | 1.29022  | 1.79509  | 4.47396  | -2.00297 | 0.071806 | 2.074778 | 0.492739 | 0.930565 | 0.494794 |
| RP11-817O13.8__lin  | 0        | 0        | 0        | 0        | 0        | 0        | 0        | 0        | 0        | #DIV/0!  | #DIV/0!  | #DIV/0!  | #DIV/0!  | #DIV/0!  | #DIV/0!  |
| RP11-818C3.1__linc  | 0        | 0        | 0.443513 | 0        | 1.36297  | 0        | 0.054031 | 0        | 0.059966 | -1.61971 | 1.959992 | 3.579697 | 0.629636 | 0.508831 | 0.471863 |
| RP11-818F20.4__lin  | 0        | 0        | 0        | 7.15084  | 1.81118  | 7.26547  | 0        | 0        | 0        | #NUM!    | #DIV/0!  | #DIV/0!  | 0.095123 | #DIV/0!  | 0.095123 |
| RP11-81H14.2__linc  | 3.44973  | 2.19705  | 2.20762  | 1.2098   | 12.8078  | 86.9931  | 0.753758 | 4.54686  | 2.95211  | -3.68486 | -0.07137 | 3.613493 | 0.370774 | 0.937044 | 0.365831 |
| RP11-81H3.2__lincR  | 1.62218  | 0        | 0.821027 | 4.42682  | 3.76663  | 85.3553  | 1.1285   | 13.2173  | 0.110429 | -5.25887 | -2.56484 | 2.694027 | 0.378727 | 0.476375 | 0.467974 |
| RP11-81N13.1__linc  | 35.5232  | 20.3524  | 20.3488  | 10.7984  | 20.8875  | 118.169  | 17.293   | 25.6184  | 16.293   | -0.97524 | 0.364548 | 1.33979  | 0.578677 | 0.493587 | 0.487857 |
| RP11-820L6.1__proc  | 1.5257   | 0        | 1.78111  | 2.44647  | 182.663  | 189.602  | 1.25099  | 0        | 0.845708 | -6.8242  | 0.657321 | 7.481517 | 0.181559 | 0.283358 | 0.180994 |
| RP11-822E23.8__pri  | 0.683047 | 0.356039 | 0.378277 | 0.325891 | 0.358852 | 6.7724   | 0.13045  | 0.476434 | 0.380577 | -2.39541 | 0.521414 | 2.916827 | 0.455494 | 0.56114  | 0.415989 |
| RP11-829H16.2__ps   | 0        | 0        | 0.092704 | 0        | 0        | 0        | 0        | 0        | 0.199573 | #DIV/0!  | -1.10621 | #NUM!    | 0.42265  | 0.42265  | 0.42265  |
| RP11-829H16.3__an   | 1.90234  | 2.00753  | 0.363466 | 0.865815 | 6.68603  | 4.36319  | 0        | 0        | 0        | -1.47935 | #DIV/0!  | #DIV/0!  | 0.293167 | 0.115529 | 0.14338  |
| RP11-82C23.2__anti  | 0        | 0        | 0.613965 | 0.095598 | 6.44325  | 167.196  | 0        | 0.094387 | 0        | -8.14452 | 2.701504 | 10.84602 | 0.400435 | 0.517081 | 0.400828 |
| RP11-830F9.5__anti  | 0        | 0.122376 | 0        | 0        | 1.44105  | 0.281159 | 0.757021 | 0        | 0        | -3.81487 | -2.62901 | 1.185855 | 0.314949 | 0.522184 | 0.662659 |
| RP11-830F9.7__sen   | 0        | 0.096524 | 0.16396  | 0.013611 | 3.46816  | 0.117726 | 0.080326 | 0.078348 | 0.399193 | -3.78853 | -1.09873 | 2.689804 | 0.428294 | 0.311111 | 0.483828 |
| RP11-831A10.2__lin  | 0.147471 | 0        | 0.203083 | 0        | 2.09857  | 2.25482  | 0.83653  | 0        | 0        | -3.63443 | -1.25478 | 2.37965  | 0.213558 | 0.60942  | 0.363864 |
| RP11-834C11.3__lin  | 0.073464 | 0.418689 | 2.47019  | 0.598795 | 6.79728  | 1161.52  | 0.24329  | 0.433849 | 0.185737 | -8.62422 | 1.779514 | 10.40373 | 0.41922  | 0.470873 | 0.419318 |
| RP11-834C11.5__pr   | 0.478635 | 0.241933 | 0.068395 | 3.01882  | 0.267102 | 2.37284  | 0        | 0.223829 | 0.148595 | -2.84246 | 1.083011 | 3.925469 | 0.180254 | 0.504805 | 0.186112 |
| RP11-834C11.8__an   | 0.592286 | 0.053992 | 0.844129 | 3.20261  | 0.825323 | 9.17144  | 2.68835  | 0        | 0.148391 | -3.14669 | -0.92853 | 2.218163 | 0.228367 | 0.648146 | 0.340752 |
| RP11-839G9.1__ant   | 0        | 3.4404   | 4.98996  | 10.8898  | 0.099265 | 33.432   | 1.64355  | 15.9268  | 3.55882  | -2.39758 | -1.32557 | 1.072008 | 0.321787 | 0.421572 | 0.616317 |
| RP11-83A24.2__anti  | 6.64821  | 4.68111  | 2.85944  | 7.54817  | 121.856  | 54.7378  | 2.15082  | 17.8591  | 3.17139  | -3.698   | -0.70821 | 2.989784 | 0.234308 | 0.627231 | 0.200286 |
| RP11-83B20.1__linc  | 0        | 0.289369 | 0.269903 | 2.34858  | 5.26229  | 0.250202 | 0.168006 | 0.053523 | 0.186537 | -3.8131  | 0.454747 | 4.267851 | 0.233461 | 0.710288 | 0.238022 |
| RP11-83C7.1__lincR  | 0        | 0.092537 | 0        | 0        | 7.99012  | 5.14196  | 0        | 0        | 0.084104 | -7.14885 | 0.137846 | 7.286698 | 0.201147 | 0.961067 | 0.203372 |
| RP11-83C7.2__lincR  | 0        | 0.017195 | 0.136347 | 0        | 2.49913  | 438.263  | 1.06037  | 0        | 0.939475 | -11.4872 | -3.70319 | 7.783968 | 0.419388 | 0.198704 | 0.420761 |
| RP11-843A23.1__an   | 0        | 0        | 2.39091  | 14.7955  | 4.59712  | 5.19907  | 0        | 0        | 0        | -3.36254 | #DIV/0!  | #DIV/0!  | 0.185959 | 0.42265  | 0.13121  |
| RP11-846F4.5__pse   | 0.109191 | 0        | 0.254514 | 0        | 0.154293 | 0        | 0.106546 | 0        | 0.118279 | 1.237096 | 0.693966 | -0.54313 | 0.618632 | 0.411551 | 0.816316 |
| RP11-847H18.2__an   | 2.632    | 6.11025  | 1.61291  | 4.20929  | 3.45031  | 21.1542  | 1.14276  | 2.7552   | 2.46133  | -1.47641 | 0.703412 | 2.179822 | 0.46134  | 0.387652 | 0.316075 |
| RP11-849F2.5__anti  | 510.738  | 299.402  | 167.756  | 99.6178  | 39.5611  | 38.3773  | 261.267  | 202.145  | 132.71   | 2.461405 | 0.714073 | -1.74733 | 0.081843 | 0.183768 | 0.02524  |
| RP11-849I19.1__linc | 0        | 0        | 0.056961 | 0        | 0.170536 | 0.417019 | 0.026066 | 0.029058 | 0.061831 | -3.36667 | -1.03789 | 2.32878  | 0.231082 | 0.119506 | 0.290996 |
| RP11-849N15.4__lin  | 0        | 0        | 0        | 0        | 6.56255  | 106.237  | 0        | 0        | 0        | #NUM!    | #DIV/0!  | #DIV/0!  | 0.388151 | #DIV/0!  | 0.388151 |

|                     |          |          |          |          |          |          |          |          |          |          |          |          |          |          |          |
|---------------------|----------|----------|----------|----------|----------|----------|----------|----------|----------|----------|----------|----------|----------|----------|----------|
| RP11-84A1.3__antis  | 0.165551 | 0        | 0.041435 | 1.57993  | 8.59412  | 3.41217  | 0.075514 | 5.70236  | 0.039597 | -6.03647 | -4.81279 | 1.22368  | 0.172897 | 0.432023 | 0.043729 |
| RP11-84A19.2__linc  | 0.001677 | 0.017142 | 0.923985 | 0.002634 | 1.93261  | 8.61012  | 0.03175  | 0.017577 | 0.017509 | -3.48351 | 3.818278 | 7.301785 | 0.300102 | 0.442387 | 0.312796 |
| RP11-84A19.4__linc  | 47.601   | 27.4391  | 36.6122  | 21.477   | 56.1082  | 16.585   | 114.995  | 47.6878  | 46.9174  | 0.24567  | -0.90863 | -1.1543  | 0.768776 | 0.20487  | 0.324609 |
| RP11-84C10.2__linc  | 0        | 0        | 0        | 0        | 0.254284 | 0.39722  | 0        | 0.065577 | 0        | #NUM!    | #NUM!    | 3.312503 | 0.202472 | 0.42265  | 0.230761 |
| RP11-84C10.4__anti  | 1.55634  | 0.051797 | 0.109834 | 0        | 0.350662 | 0.272773 | 0.411094 | 0        | 0        | 1.462395 | 2.063166 | 0.600771 | 0.60334  | 0.34484  | 0.797458 |
| RP11-855O10.2__lin  | 0        | 0        | 0.903124 | 0.223029 | 2.457    | 3.25661  | 1.20685  | 0.137619 | 0        | -2.71665 | -0.57404 | 2.14261  | 0.147675 | 0.831655 | 0.356076 |
| RP11-855O10.3__lin  | 0        | 0        | 0.618031 | 0        | 0        | 0.999453 | 0        | 0        | 0        | -0.69346 | #DIV/0!  | #DIV/0!  | 0.42265  | 0.42265  | 0.42265  |
| RP11-856M7.1__ant   | 0        | 0        | 0.065392 | 0.021725 | 0.161419 | 86.9931  | 0.024033 | 0.044649 | 0.035587 | -10.3806 | -0.67311 | 9.707489 | 0.421434 | 0.618394 | 0.42189  |
| RP11-856M7.6__linc  | 0        | 0        | 0        | 0        | 0        | 12.1485  | 0        | 0        | 0        | #NUM!    | #DIV/0!  | #DIV/0!  | 0.42265  | #DIV/0!  | 0.42265  |
| RP11-857B24.1__an   | 1.37497  | 0.821925 | 1.41756  | 0.25553  | 2.62159  | 10.9337  | 0.282499 | 0.74096  | 0.751038 | -1.93395 | 1.026368 | 2.960317 | 0.396175 | 0.171568 | 0.3289   |
| RP11-85A1.3__antis  | 0.03888  | 0        | 0.194151 | 0.256176 | 0.411654 | 7.23878  | 0.113754 | 0        | 0        | -5.08447 | 1.034604 | 6.11907  | 0.372472 | 0.669061 | 0.37958  |
| RP11-85B7.2__antis  | 0.020291 | 0.023924 | 0.045745 | 0.08787  | 0.380913 | 4.23709  | 0.07349  | 0        | 0.044275 | -5.70903 | -0.38855 | 5.320478 | 0.366542 | 0.724879 | 0.370813 |
| RP11-85F14.5__anti  | 9.42143  | 1.10904  | 1.31514  | 6.35908  | 3.41512  | 11.7807  | 5.3416   | 89.9309  | 3.65356  | -0.86366 | -3.062   | -2.19833 | 0.497051 | 0.434761 | 0.485973 |
| RP11-85G21.1__linc  | 0        | 0        | 0        | 0        | 0.983873 | 0        | 0        | 0        | 0        | #NUM!    | #DIV/0!  | #DIV/0!  | 0.42265  | #DIV/0!  | 0.42265  |
| RP11-85I21.1__lincF | 0        | 0        | 0.100861 | 0.42428  | 0.602432 | 52.1068  | 0.80236  | 0.125849 | 0.047009 | -9.04111 | -3.27336 | 5.767754 | 0.411311 | 0.379804 | 0.421597 |
| RP11-85K15.2__pro   | 26.2964  | 22.3265  | 15.8362  | 8.00521  | 32.3032  | 59.6368  | 7.18865  | 16.3847  | 9.45556  | -0.63275 | 0.964655 | 1.597408 | 0.5776   | 0.136015 | 0.266235 |
| RP11-85M11.2__linc  | 0.52101  | 0.153571 | 2.59993  | 0.211925 | 25.4741  | 637.473  | 0.278312 | 0.123791 | 0.089144 | -7.66193 | 2.736758 | 10.39869 | 0.400381 | 0.363008 | 0.400221 |
| RP11-861E21.1__lin  | 0.341542 | 0        | 1.58531  | 0        | 2.91083  | 4.38005  | 0.570009 | 0        | 0        | -1.91985 | 1.757189 | 3.677036 | 0.235273 | 0.510907 | 0.266466 |
| RP11-862G15.1__lin  | 0.015126 | 0        | 0.12113  | 0        | 1.466    | 13.9708  | 0.587403 | 0        | 0.285462 | -6.82391 | -2.67944 | 4.144471 | 0.365711 | 0.285726 | 0.389635 |
| RP11-862G15.2__lin  | 0.022517 | 0        | 0.157662 | 0.178985 | 3.53586  | 2.78105  | 0.176292 | 0        | 0.097871 | -5.17203 | -0.60561 | 4.56642  | 0.172323 | 0.671119 | 0.190721 |
| RP11-863P13.3__lin  | 0.31888  | 0.131005 | 0        | 0.127403 | 0.852505 | 0.333992 | 0.088493 | 0.159252 | 0.717413 | -1.54623 | -1.10121 | 0.445018 | 0.390014 | 0.605461 | 0.746151 |
| RP11-864J10.4__an   | 0        | 0        | 0        | 7.32448  | 5.27791  | 7.99202  | 2.65224  | 0        | 0        | #NUM!    | #NUM!    | 2.95697  | 0.013854 | 0.42265  | 0.027915 |
| RP11-867G2.2__linc  | 0        | 0        | 0        | 0        | 33.3774  | 7.6922   | 0.235588 | 0        | 0        | #NUM!    | #NUM!    | 7.445661 | 0.307739 | 0.42265  | 0.311726 |
| RP11-867G2.5__linc  | 0        | 0        | 0.139287 | 0        | 1.97284  | 0        | 1.68541  | 0        | 0.050279 | -3.82414 | -3.63938 | 0.184765 | 0.464744 | 0.453901 | 0.947242 |
| RP11-867G2.8__ant   | 6.57224  | 3.8504   | 36.799   | 10.2347  | 8.32964  | 144.759  | 34.5059  | 24.0645  | 7.22998  | -1.79021 | -0.47865 | 1.311563 | 0.379999 | 0.763853 | 0.599361 |
| RP11-867G23.12__a   | 1.30385  | 0.298157 | 1.40917  | 0.818721 | 0.623592 | 2.49612  | 0.593227 | 0.733433 | 1.55712  | -0.38729 | 0.062366 | 0.449661 | 0.56616  | 0.913096 | 0.373505 |
| RP11-867G23.13__a   | 2.04742  | 0.586522 | 3.84479  | 1.49187  | 0.804517 | 17.5049  | 0.170212 | 0.88547  | 1.37354  | -1.61181 | 1.415217 | 3.027028 | 0.437453 | 0.250104 | 0.380328 |
| RP11-867G23.3__lin  | 11.9029  | 4.02736  | 6.91803  | 5.75284  | 3.25343  | 4.16726  | 3.76305  | 11.8189  | 7.60209  | 0.794444 | -0.02105 | -0.81549 | 0.176331 | 0.982828 | 0.387795 |
| RP11-867O8.5__ant   | 0.508405 | 0.317221 | 1.03105  | 0.40792  | 3.60769  | 13.4787  | 1.50327  | 1.7297   | 0.568207 | -3.23609 | -1.03372 | 2.202368 | 0.298799 | 0.372324 | 0.396152 |
| RP11-86H7.6__lincR  | 0        | 0        | 0.096539 | 0.054909 | 0.014727 | 0.224168 | 0.094551 | 0.030116 | 0.089996 | -1.60568 | -1.15289 | 0.452788 | 0.18485  | 0.314219 | 0.675363 |
| RP11-871F6.3__linc  | 0        | 0        | 1.56313  | 0        | 9.58036  | 126.118  | 0        | 0        | 0        | -6.43982 | #DIV/0!  | #DIV/0!  | 0.380073 | 0.42265  | 0.380577 |
| RP11-872J21.3__an   | 0.222399 | 0.262451 | 0.055439 | 0.291483 | 0.233969 | 1.97455  | 0.162092 | 0.120564 | 0        | -2.21013 | 0.934684 | 3.14481  | 0.410881 | 0.092115 | 0.354105 |
| RP11-873E20.1__lin  | 0.425311 | 0.539449 | 0.343279 | 0.278067 | 0.223676 | 0.145601 | 0.186666 | 0        | 0.124362 | 1.014801 | 2.072289 | 1.057488 | 0.047766 | 0.085135 | 0.199494 |
| RP11-875H7.1__linc  | 0        | 0        | 0        | 0        | 1.55486  | 3.79465  | 0.061125 | 0        | 0.067833 | #NUM!    | #NUM!    | 5.374429 | 0.246853 | 0.184606 | 0.253685 |
| RP11-875H7.2__linc  | 0        | 0        | 0        | 0        | 0.119488 | 0.212594 | 0.334483 | 0        | 0        | #NUM!    | #NUM!    | -0.01039 | 0.213819 | 0.42265  | 0.996651 |

|                     |          |          |          |          |          |          |          |          |          |          |          |          |          |          |          |
|---------------------|----------|----------|----------|----------|----------|----------|----------|----------|----------|----------|----------|----------|----------|----------|----------|
| RP11-875H7.5__linc  | 0        | 0        | 0        | 0        | 0        | 5.93802  | 0        | 0        | 0        | #NUM!    | #DIV/0!  | #DIV/0!  | 0.42265  | #DIV/0!  | 0.42265  |
| RP11-879F14.1__lin  | 2.70561  | 0.338491 | 0.509027 | 0        | 56.3112  | 21.9843  | 0.113002 | 0.388471 | 0.204938 | -4.46177 | 2.33051  | 6.792278 | 0.280936 | 0.370493 | 0.253575 |
| RP11-87C12.5__linc  | 0        | 0        | 0        | 0        | 3.4875   | 10.749   | 0.741655 | 0        | 0        | #NUM!    | #NUM!    | 4.262702 | 0.272654 | 0.42265  | 0.312026 |
| RP11-87F15.2__anti  | 34.4096  | 22.8528  | 15.3334  | 13.0832  | 5.93185  | 6.51464  | 12.8987  | 25.9963  | 18.9371  | 1.50771  | 0.328016 | -1.17969 | 0.050421 | 0.613187 | 0.209735 |
| RP11-87P13.2__linc  | 0.140035 | 0        | 0.046583 | 0        | 0        | 0        | 0        | 0.152091 | 0        | #DIV/0!  | 0.295156 | #NUM!    | 0.269926 | 0.905936 | 0.42265  |
| RP11-883G14.2__lin  | 0        | 0        | 0        | 0        | 2.78347  | 0.148202 | 0        | 0        | 0.096933 | #NUM!    | #NUM!    | 4.918595 | 0.39277  | 0.42265  | 0.412115 |
| RP11-884K10.7__an   | 0        | 1.26723  | 0        | 8.25755  | 2.11983  | 1.79297  | 0        | 2.34069  | 0        | -3.26362 | -0.88526 | 2.378365 | 0.258799 | 0.42265  | 0.32861  |
| RP11-885B4.1__linc  | 0        | 0        | 1.73982  | 40.5075  | 6.53846  | 23.2864  | 0        | 0        | 0        | -5.33718 | #DIV/0!  | #DIV/0!  | 0.145498 | 0.42265  | 0.139313 |
| RP11-886D15.1__lin  | 0.043211 | 0        | 0        | 0        | 6.51977  | 84.4986  | 0        | 0        | 0.186942 | -11.0405 | -2.11311 | 8.927423 | 0.38024  | 0.567507 | 0.379855 |
| RP11-887P2.5__anti  | 0        | 3.02562  | 5.88288  | 83.9007  | 5.26561  | 34.8538  | 5.40863  | 20.1364  | 0.042083 | -3.79925 | -1.52216 | 2.277085 | 0.251495 | 0.489748 | 0.347854 |
| RP11-889D3.2__linc  | 0        | 0        | 0        | 0        | 2.37083  | 0        | 0.725225 | 0        | 0        | #NUM!    | #NUM!    | 1.708892 | 0.42265  | 0.42265  | 0.616786 |
| RP11-88H10.2__linc  | 0        | 0        | 0.042548 | 0        | 0.27035  | 0        | 0.614517 | 0        | 0        | -2.66767 | -3.85229 | -1.18462 | 0.519429 | 0.463908 | 0.704025 |
| RP11-88H9.2__lincR  | 0.02865  | 0.056304 | 0.092926 | 0        | 0.193024 | 0.064114 | 0.11247  | 0.031343 | 0.1321   | -0.53164 | -0.63331 | -0.10167 | 0.679173 | 0.409381 | 0.947975 |
| RP11-88I21.2__lincF | 0.035338 | 0        | 0.782344 | 0.842312 | 19.7037  | 189.602  | 1.82471  | 0.038465 | 0        | -8.00565 | -1.18815 | 6.817499 | 0.363397 | 0.690977 | 0.369152 |
| RP11-88L24.4__anti  | 0        | 0        | 0        | 0        | 0        | 0        | 0        | 0        | 0        | #DIV/0!  | #DIV/0!  | #DIV/0!  | #DIV/0!  | #DIV/0!  | #DIV/0!  |
| RP11-893F2.14__an   | 0        | 0        | 0.99665  | 0.089843 | 0.289114 | 4.49053  | 0.09949  | 0.018486 | 0.07365  | -2.28861 | 2.378791 | 4.667402 | 0.362418 | 0.499445 | 0.389682 |
| RP11-893F2.5__linc  | 0.089715 | 0.423736 | 0.481316 | 0        | 8.09583  | 17.6396  | 0.195807 | 0        | 0        | -4.69325 | 2.344926 | 7.03818  | 0.240035 | 0.290316 | 0.240312 |
| RP11-893F2.9__anti  | 0.224106 | 0.85892  | 1.15339  | 2.47537  | 2.20689  | 8.0904   | 0.556049 | 1.36169  | 0.474012 | -2.5138  | -0.09688 | 2.41692  | 0.179809 | 0.901234 | 0.241324 |
| RP11-894P9.2__anti  | 11.2852  | 10.5617  | 7.17894  | 5.1164   | 3.93527  | 2.45085  | 4.48964  | 6.83699  | 5.6984   | 1.335388 | 0.76968  | -0.56571 | 0.009453 | 0.121792 | 0.275347 |
| RP11-896J10.3__prc  | 0        | 0.073558 | 0.280344 | 0.054587 | 12.0587  | 23.698   | 0.174749 | 0.014969 | 0.029823 | -6.66092 | 0.688859 | 7.349781 | 0.221815 | 0.750581 | 0.22622  |
| RP11-897M7.1__linc  | 0        | 0.024486 | 0.159074 | 0.073746 | 5.10683  | 8.95383  | 0.270538 | 0.022731 | 0.026422 | -6.26681 | -0.80042 | 5.46639  | 0.20707  | 0.739159 | 0.22379  |
| RP11-899L11.1__lini | 0.021644 | 0        | 0.043304 | 0        | 2.69662  | 4.51026  | 0        | 0        | 0.094098 | -6.79394 | -0.53486 | 6.259075 | 0.209751 | 0.695189 | 0.206366 |
| RP11-89C3.4__lincR  | 0        | 0        | 0.383451 | 0        | 0        | 1.59862  | 0        | 0        | 0        | -2.05971 | #DIV/0!  | #DIV/0!  | 0.42265  | 0.42265  | 0.42265  |
| RP11-89H19.1__anti  | 0        | 16.1817  | 0        | 7.87597  | 7.13885  | 9.48529  | 0        | 0        | 0        | -0.59843 | #DIV/0!  | #DIV/0!  | 0.685891 | 0.42265  | 0.007119 |
| RP11-89K21.1__linc  | 0.221592 | 1.45499  | 1.7269   | 0.719681 | 3.25635  | 25.6659  | 1.26566  | 0.325934 | 0.228537 | -3.12256 | 0.902969 | 4.025525 | 0.369112 | 0.574236 | 0.372822 |
| RP11-8L2.1__proces  | 2.63099  | 8.66494  | 4.39122  | 1.17767  | 1783.81  | 61.0596  | 1.26601  | 0.10369  | 5.81526  | -6.87871 | 1.126531 | 8.005244 | 0.404995 | 0.441272 | 0.405082 |
| RP11-8L21.1__lincR  | 0        | 0        | 0.282701 | 0.364468 | 0        | 2.40016  | 1.2275   | 0        | 0.302429 | -3.28974 | -2.43612 | 0.853621 | 0.333081 | 0.413446 | 0.685736 |
| RP11-8L8.2__lincRN  | 0        | 0        | 0        | 0        | 2.21733  | 2.16545  | 0        | 0        | 0        | #NUM!    | #DIV/0!  | #DIV/0!  | 0.183561 | #DIV/0!  | 0.183561 |
| RP11-902B17.1__pri  | 0.946909 | 0.342427 | 1.19911  | 2.54284  | 4.39131  | 10.5453  | 0.479056 | 0.722931 | 0.455633 | -2.81234 | 0.586132 | 3.398475 | 0.160501 | 0.498928 | 0.164435 |
| RP11-909B2.1__linc  | 0        | 0        | 0        | 0        | 3.1693   | 2.51275  | 0        | 0        | 0.053806 | #NUM!    | #NUM!    | 6.722501 | 0.1889   | 0.42265  | 0.18993  |
| RP11-909M7.3__linc  | 11.3149  | 5.11343  | 9.46686  | 38.1106  | 4.68023  | 296.357  | 2.20595  | 6.0482   | 6.25071  | -3.71116 | 0.836148 | 4.547306 | 0.372329 | 0.322402 | 0.358816 |
| RP11-90C1.1__lincR  | 0        | 0        | 0.117387 | 0.231272 | 3.34302  | 2.21187  | 0.228721 | 0        | 0.126917 | -5.62326 | -1.59914 | 4.024125 | 0.171787 | 0.399115 | 0.204215 |
| RP11-90C4.1__lincR  | 0        | 0        | 0.458929 | 1731.06  | 6.32791  | 13.0955  | 0        | 0        | 0.369447 | -11.8972 | 0.312904 | 12.2101  | 0.416344 | 0.42265  | 0.416314 |
| RP11-90C4.2__lincR  | 0        | 0        | 0        | 0        | 0.705617 | 78.8654  | 0        | 0        | 0        | #NUM!    | #DIV/0!  | #DIV/0!  | 0.417507 | #DIV/0!  | 0.417507 |
| RP11-90H3.1__pseu   | 16.5634  | 12.5305  | 10.0623  | 94.3988  | 5.81814  | 42.5499  | 10.5778  | 12.6466  | 207.226  | -1.86635 | -2.55714 | -0.6908  | 0.292996 | 0.440095 | 0.726219 |

|                     |          |          |          |          |          |          |          |          |          |          |          |          |          |          |          |
|---------------------|----------|----------|----------|----------|----------|----------|----------|----------|----------|----------|----------|----------|----------|----------|----------|
| RP11-90K6.1__lincR  | 2.78292  | 1.17663  | 4.49148  | 0.504959 | 6.33238  | 3.62799  | 1.16051  | 1.34154  | 0.960535 | -0.30842 | 1.287278 | 1.595696 | 0.796056 | 0.259494 | 0.290297 |
| RP11-91A18.4__anti  | 1.27735  | 0.424338 | 1.17026  | 0.835465 | 0.326442 | 0.257826 | 0.387738 | 1.33615  | 0.919798 | 1.01641  | 0.119479 | -0.89693 | 0.176808 | 0.898491 | 0.451232 |
| RP11-91I8.1__lincR  | 0        | 0        | 0        | 0        | 2.74025  | 2.72761  | 0        | 0        | 0        | #NUM!    | #DIV/0!  | #DIV/0!  | 0.183506 | #DIV/0!  | 0.183506 |
| RP11-91I8.3__antise | 0        | 0        | 0.831247 | 4.78971  | 0        | 0        | 0.069475 | 0        | 0        | -2.52659 | 3.580707 | 6.107296 | 0.529875 | 0.472743 | 0.42265  |
| RP11-91J3.2__lincR  | 1.52659  | 0        | 0        | 2.12453  | 0        | 0        | 1.41778  | 0        | 1.54342  | -0.47683 | -0.95587 | -0.47904 | 0.42265  | 0.464681 | 0.71544  |
| RP11-91K11.2__anti  | 0.075732 | 0.714582 | 4.54404  | 1.03584  | 0.053737 | 2.02209  | 2.74073  | 3.77188  | 4.79754  | 0.777626 | -1.08423 | -1.86186 | 0.538104 | 0.150986 | 0.042426 |
| RP11-91K9.1__lincR  | 1.88903  | 0        | 0.190774 | 0.026412 | 3.86538  | 62.3016  | 0.240976 | 0.032577 | 0.043273 | -4.99217 | 2.714687 | 7.706854 | 0.40545  | 0.384967 | 0.390254 |
| RP11-91P24.7__anti  | 0.069224 | 1.1557   | 1.27237  | 4.39897  | 11.5053  | 19.2432  | 0.564502 | 0.302121 | 0        | -3.81498 | 1.526889 | 5.341873 | 0.110199 | 0.415319 | 0.124035 |
| RP11-923I11.3__linc | 0.296982 | 1.77301  | 2.94912  | 1.35326  | 3.80195  | 0        | 0        | 0.282758 | 0.120618 | -0.0386  | 3.637235 | 3.675834 | 0.978947 | 0.170031 | 0.27274  |
| RP11-928F19.5__lin  | 0        | 0        | 0        | 0        | 0        | 0.285692 | 0        | 0        | 0.051786 | #NUM!    | #NUM!    | 2.463824 | 0.42265  | 0.42265  | 0.42265  |
| RP11-92A5.2__antis  | 0        | 0        | 0        | 0        | 1.04654  | 0.224633 | 0        | 0.276498 | 0        | #NUM!    | #NUM!    | 2.200819 | 0.314342 | 0.42265  | 0.284068 |
| RP11-92G12.3__linc  | 8.93773  | 5.98786  | 6.23137  | 4.53663  | 6.23491  | 18.483   | 4.07007  | 6.17998  | 5.50628  | -0.46753 | 0.425201 | 0.892729 | 0.64094  | 0.366907 | 0.399841 |
| RP11-930O11.1__lin  | 0.027399 | 1.36716  | 13.6577  | 0.072482 | 4.06837  | 3.50445  | 0.375009 | 0        | 0        | 0.977335 | 5.326911 | 4.349576 | 0.592976 | 0.382834 | 0.219524 |
| RP11-930O11.2__lin  | 0        | 2.82761  | 1.14662  | 0        | 2.63495  | 0        | 1.08844  | 0        | 0        | 0.5929   | 1.868413 | 1.275514 | 0.334963 | 0.4857   | 0.686809 |
| RP11-932A10.1__lin  | 0.021925 | 0        | 0.014642 | 0.029192 | 0.086161 | 0        | 0.021528 | 0        | 0        | -1.65745 | 0.764348 | 2.421798 | 0.481318 | 0.407214 | 0.373764 |
| RP11-932O9.7__ant   | 0        | 0.852186 | 0        | 1.03277  | 2.63673  | 31.4069  | 0.491949 | 0        | 0.644993 | -5.36319 | -0.41592 | 4.94727  | 0.372211 | 0.860265 | 0.365437 |
| RP11-933H2.4__pro   | 2.58076  | 2.76059  | 3.195    | 11.5287  | 91.8338  | 20.6165  | 1.71631  | 6.38492  | 3.74989  | -3.86033 | -0.47333 | 3.387    | 0.269187 | 0.491973 | 0.261402 |
| RP11-936I5.1__antis | 0        | 0        | 0        | 0        | 0        | 0        | 0        | 0        | 0        | #DIV/0!  | #DIV/0!  | #DIV/0!  | #DIV/0!  | #DIV/0!  | #DIV/0!  |
| RP11-93B14.5__anti  | 0        | 0        | 0        | 4.09683  | 7.73591  | 0        | 0        | 0        | 0        | #NUM!    | #DIV/0!  | #DIV/0!  | 0.219577 | #DIV/0!  | 0.219577 |
| RP11-93H12.4__pro   | 0        | 0        | 0.229135 | 0.293873 | 0.629743 | 0.530004 | 0.29885  | 0        | 0        | -2.66538 | -0.38322 | 2.282157 | 0.066442 | 0.893118 | 0.190012 |
| RP11-93I21.3__lincF | 2.37865  | 4.84321  | 0.802207 | 3.01697  | 1.0558   | 41.8621  | 1.87952  | 1.02547  | 1.03864  | -2.51718 | 1.024809 | 3.541994 | 0.469247 | 0.38928  | 0.406365 |
| RP11-93K22.6__anti  | 0        | 2.3149   | 1.73711  | 1.38281  | 10.9934  | 3.62228  | 0        | 0        | 1.05889  | -1.98123 | 1.936085 | 3.917311 | 0.232601 | 0.283611 | 0.24157  |
| RP11-93L9.1__lincR  | 2.02726  | 10.6685  | 3.76275  | 5.19847  | 22.3989  | 637.473  | 9.90083  | 4.90029  | 2.13504  | -5.3366  | -0.04127 | 5.295328 | 0.409182 | 0.972131 | 0.411261 |
| RP11-93N20.1__linc  | 0        | 0        | 0        | 0        | 0        | 0        | 0        | 0        | 0        | #DIV/0!  | #DIV/0!  | #DIV/0!  | #DIV/0!  | #DIV/0!  | #DIV/0!  |
| RP11-944L7.4__anti  | 6.41735  | 4.74657  | 5.8095   | 5.92208  | 78.5515  | 4.64697  | 1.39984  | 9.97413  | 4.52981  | -2.39248 | 0.093908 | 2.486388 | 0.435701 | 0.91607  | 0.384928 |
| RP11-945A11.2__lin  | 0        | 0        | 0.158073 | 0        | 0        | 23.1152  | 0        | 0        | 0        | -7.19211 | #DIV/0!  | #DIV/0!  | 0.42265  | 0.42265  | 0.42265  |
| RP11-945C19.1__lin  | 0        | 0        | 0        | 0.100694 | 122.616  | 248.682  | 0.148817 | 0.055313 | 0        | #NUM!    | #NUM!    | 10.82927 | 0.226642 | 0.257676 | 0.226999 |
| RP11-945C19.4__an   | 0.480246 | 0.755272 | 0.314741 | 0.167006 | 2.62159  | 9.48529  | 0        | 0.334653 | 0.159232 | -2.98501 | 1.650262 | 4.635273 | 0.338804 | 0.07179  | 0.291825 |
| RP11-946L16.1__lin  | 0        | 0        | 0.433579 | 0        | 0        | 6.06947  | 0        | 0        | 0        | -3.8072  | #DIV/0!  | #DIV/0!  | 0.42265  | 0.42265  | 0.42265  |
| RP11-94C24.6__linc  | 0        | 0        | 0        | 0        | 0        | 1.25255  | 0.649718 | 0        | 0        | #NUM!    | #NUM!    | 0.946983 | 0.42265  | 0.42265  | 0.75334  |
| RP11-94L15.2__lincl | 0        | 1.25277  | 1.10687  | 1.65854  | 5.14809  | 25.6659  | 1.10414  | 3.80013  | 3.49884  | -3.78258 | -1.83236 | 1.950225 | 0.302376 | 0.047878 | 0.374453 |
| RP11-94M14.2__linc  | 0.081267 | 0        | 0.688772 | 3.50861  | 28.3415  | 41.376   | 0.277293 | 0.132552 | 0        | -6.57128 | 0.909853 | 7.481136 | 0.158358 | 0.714456 | 0.162227 |
| RP11-94P11.4__linc  | 0        | 0        | 0.98579  | 0        | 330.24   | 476.842  | 0.060808 | 0.067812 | 0.202529 | -9.67722 | 1.573799 | 11.25102 | 0.196508 | 0.520687 | 0.196695 |
| RP11-955H22.1__lin  | 0.259391 | 0        | 0        | 0        | 5.07088  | 5.71897  | 0.093685 | 0        | 0.155979 | -5.3784  | 0.055139 | 5.433541 | 0.205023 | 0.975323 | 0.191625 |
| RP11-955H22.3__lin  | 0        | 0        | 0        | 0.46885  | 3.87078  | 2.65217  | 0        | 0        | 0        | #NUM!    | #DIV/0!  | #DIV/0!  | 0.143963 | #DIV/0!  | 0.143963 |

|                     |          |          |          |          |          |          |          |          |          |          |          |          |          |          |          |
|---------------------|----------|----------|----------|----------|----------|----------|----------|----------|----------|----------|----------|----------|----------|----------|----------|
| RP11-956E11.1__lin  | 0.098234 | 0.11601  | 0.487744 | 0.888962 | 15.3279  | 5.49815  | 0.881254 | 0        | 0.524677 | -4.9511  | -1.00201 | 3.949095 | 0.243427 | 0.487119 | 0.27237  |
| RP11-958F21.1__lin  | 0        | 0        | 0        | 0.155468 | 37.5408  | 6.9218   | 0        | 0        | 0        | #NUM!    | #DIV/0!  | #DIV/0!  | 0.325187 | #DIV/0!  | 0.325187 |
| RP11-958J22.1__prc  | 0.014003 | 0        | 1.58073  | 3.97945  | 53.505   | 24.3389  | 1.25209  | 0.076532 | 0        | -5.68113 | 0.263385 | 5.944511 | 0.205203 | 0.923537 | 0.209287 |
| RP11-958N24.1__ps   | 2.65321  | 3.66338  | 5.55438  | 3.70905  | 5.06505  | 8.48661  | 0        | 1.20865  | 0.617171 | -0.54005 | 2.700821 | 3.240875 | 0.089388 | 0.052192 | 0.063556 |
| RP11-95D17.1__linc  | 2.47454  | 3.02277  | 2.46065  | 2.18048  | 2.28971  | 300.953  | 1.24691  | 2.00971  | 2.16236  | -5.26227 | 0.554377 | 5.816644 | 0.424638 | 0.09478  | 0.420308 |
| RP11-95H3.1__lincR  | 0.092125 | 0        | 0.270443 | 0.216132 | 12.0587  | 2.98899  | 0        | 0.144892 | 0.075069 | -5.39572 | 0.721003 | 6.116726 | 0.304055 | 0.683452 | 0.291949 |
| RP11-95I16.2__lincF | 0.010482 | 0.140756 | 0.303943 | 0.121622 | 273.291  | 14.2177  | 0.479016 | 0.038035 | 0.075721 | -9.30356 | -0.38104 | 8.922523 | 0.393792 | 0.850452 | 0.394336 |
| RP11-95L3.2__lincR  | 0        | 0        | 0        | 0        | 0.534408 | 0        | 0        | 0        | 0.078479 | #NUM!    | #NUM!    | 2.76757  | 0.42265  | 0.42265  | 0.512661 |
| RP11-95M5.1__lincF  | 0.022728 | 0        | 0.08348  | 0        | 0.999993 | 2.63515  | 0.937508 | 0.024873 | 0.074345 | -5.09705 | -3.28708 | 1.809976 | 0.256606 | 0.412963 | 0.481998 |
| RP11-95O2.1__lincR  | 0        | 0        | 0.056472 | 0        | 4.34374  | 4.93145  | 0.069134 | 0.030828 | 0.076771 | -7.35969 | -1.64595 | 5.713733 | 0.184856 | 0.114048 | 0.191118 |
| RP11-95P13.1__linc  | 0.934567 | 0.254783 | 1.23744  | 4.64204  | 5.02146  | 0.795326 | 1.07217  | 0.117754 | 0.851249 | -2.1076  | 0.249651 | 2.357251 | 0.234127 | 0.484957 | 0.198792 |
| RP11-95P2.1__lincR  | 0.158933 | 0.240676 | 1.53169  | 0.088741 | 2.77698  | 1.54302  | 0.772605 | 0.498164 | 0.445806 | -1.1908  | 0.170039 | 1.360834 | 0.43627  | 0.90266  | 0.406754 |
| RP11-95P2.3__lincR  | 0        | 0        | 0.148132 | 0        | 1.85001  | 4.33225  | 0.819288 | 0        | 0.779081 | -5.38318 | -3.43165 | 1.951534 | 0.23849  | 0.190303 | 0.352751 |
| RP11-960D24.1__lin  | 0        | 0        | 0        | 0        | 0        | 0        | 0        | 0        | 0.159418 | #DIV/0!  | #NUM!    | #NUM!    | #DIV/0!  | 0.42265  | 0.42265  |
| RP11-960L18.1__lini | 0.317094 | 0        | 2.11446  | 0.721751 | 5.76923  | 237.085  | 1.65966  | 0.85557  | 0.085042 | -6.64635 | -0.09678 | 6.549565 | 0.407659 | 0.962235 | 0.413095 |
| RP11-964E11.2__an   | 0        | 0        | 3.69733  | 82.4427  | 2.09392  | 0        | 0        | 0        | 0        | -4.51502 | #DIV/0!  | #DIV/0!  | 0.434629 | 0.42265  | 0.408177 |
| RP11-966I7.3__antis | 0.124873 | 0        | 0        | 0        | 91.5996  | 19.9684  | 0        | 0        | 0        | -9.80325 | #DIV/0!  | #DIV/0!  | 0.313695 | 0.42265  | 0.312926 |
| RP11-968A15.8__se   | 44.275   | 28.2367  | 19.5505  | 14.5288  | 39.9278  | 65.8776  | 24.3035  | 41.8037  | 26.4009  | -0.38637 | -0.00697 | 0.379395 | 0.709984 | 0.989742 | 0.60539  |
| RP11-968O1.5__sen   | 11.5746  | 3.63124  | 5.18611  | 3.8334   | 4.39277  | 2.8222   | 3.12762  | 12.1713  | 11.0405  | 0.884166 | -0.36922 | -1.25339 | 0.336454 | 0.74303  | 0.221335 |
| RP11-96B5.4__lincR  | 0.034594 | 0        | 0        | 0.091301 | 0.14675  | 0.196821 | 0.067537 | 0.075321 | 0        | -3.65201 | -2.04601 | 1.606007 | 0.082831 | 0.239674 | 0.199935 |
| RP11-96C23.14__pr   | 0.170554 | 0        | 0.353664 | 0.491473 | 1.45815  | 227.522  | 0.489684 | 0.136777 | 0.868791 | -8.77393 | -1.51215 | 7.261783 | 0.418141 | 0.097531 | 0.419289 |
| RP11-96C23.5__pro   | 12.6168  | 2.30697  | 8.00747  | 5.78035  | 1.83095  | 3.52153  | 19.2273  | 13.8199  | 18.1904  | 1.042494 | -1.15989 | -2.20238 | 0.168346 | 0.02323  | 0.003341 |
| RP11-96D24.1__linc  | 0        | 0        | 0        | 0        | 0        | 43.0083  | 0        | 0        | 0        | #NUM!    | #DIV/0!  | #DIV/0!  | 0.42265  | #DIV/0!  | 0.42265  |
| RP11-96H17.1__pro   | 0.01152  | 0.027168 | 3.41765  | 0.122535 | 5.18998  | 78.8654  | 0.101707 | 0.037793 | 0.050198 | -4.60613 | 4.187473 | 8.793599 | 0.383735 | 0.440138 | 0.386066 |
| RP11-96H19.1__linc  | 3.75389  | 28.5197  | 5.83124  | 8.40066  | 43.8934  | 61.0596  | 10.9988  | 14.0529  | 0.924745 | -1.57279 | 0.55277  | 2.125555 | 0.244649 | 0.585836 | 0.249094 |
| RP11-96K19.4__sen   | 0.143428 | 0.355843 | 0.150427 | 0.130259 | 0.14366  | 0.191388 | 0.077265 | 0.07879  | 0.07329  | 0.481586 | 1.502253 | 1.020667 | 0.508279 | 0.177607 | 0.059088 |
| RP11-96L14.7__anti  | 1.65809  | 1.50013  | 2.89336  | 0.434676 | 2.60711  | 7.02252  | 2.76625  | 2.12745  | 4.56046  | -0.73386 | -0.64364 | 0.090227 | 0.478982 | 0.063553 | 0.897137 |
| RP11-96P7.1__lincR  | 0.027189 | 0        | 0.081661 | 0        | 1.04911  | 25.4267  | 0.053321 | 0        | 0.029606 | -7.92619 | 0.392441 | 8.318628 | 0.399885 | 0.74304  | 0.400525 |
| RP11-973H7.5__linc  | 0        | 0        | 0.710332 | 0        | 2.42111  | 3.69479  | 0        | 0        | 0        | -3.106   | #DIV/0!  | #DIV/0!  | 0.187902 | 0.42265  | 0.200654 |
| RP11-973N13.3__an   | 0.398549 | 0.287253 | 0.815542 | 0        | 4.50668  | 33.1522  | 1.59867  | 2.7546   | 2.42885  | -4.64866 | -2.17548 | 2.473182 | 0.359905 | 0.042113 | 0.421488 |
| RP11-973N13.4__an   | 31.2804  | 24.0917  | 10.8138  | 9.86197  | 11.4222  | 6.10747  | 8.72204  | 14.3623  | 38.5447  | 1.272788 | 0.102914 | -1.16987 | 0.115623 | 0.928986 | 0.393468 |
| RP11-977B10.2__an   | 0        | 36.7374  | 58.6695  | 46.1822  | 12.5255  | 15.7203  | 34.6559  | 153.692  | 115.192  | 0.358248 | -1.66972 | -2.02797 | 0.820706 | 0.106179 | 0.235726 |
| RP11-977G19.5__se   | 467.245  | 373.615  | 222.894  | 179.321  | 149.519  | 75.794   | 147.887  | 437.885  | 237.445  | 1.394475 | 0.36982  | -1.02466 | 0.032663 | 0.574118 | 0.272247 |
| RP11-977P2.1__linc  | 0        | 0        | 0        | 0        | 0        | 0        | 0        | 0        | 0        | #DIV/0!  | #DIV/0!  | #DIV/0!  | #DIV/0!  | #DIV/0!  | #DIV/0!  |
| RP11-978I15.10__ar  | 0.056252 | 0.066332 | 0.177418 | 2.31096  | 456.324  | 24.626   | 0.885049 | 0.158612 | 0.269654 | -10.6536 | -2.13017 | 8.523446 | 0.389742 | 0.302701 | 0.390889 |

|                    |          |          |          |          |          |          |          |          |          |          |          |          |          |          |          |         |
|--------------------|----------|----------|----------|----------|----------|----------|----------|----------|----------|----------|----------|----------|----------|----------|----------|---------|
| RP11-97E7.1__lincR | 0        | 0        | 0        | 0        | 0        | 0        | 0        | 0        | 0        | 0        | #DIV/0!  | #DIV/0!  | #DIV/0!  | #DIV/0!  | #DIV/0!  | #DIV/0! |
| RP11-97O12.2__linc | 0        | 0.441444 | 0.832772 | 0.065758 | 0.264516 | 4.8155   | 0        | 0.293188 | 0.107807 | -2.01378 | 1.667954 | 3.681732 | 0.439395 | 0.318682 | 0.418169 |         |
| RP11-97O12.7__pro  | 7.76624  | 4.23193  | 5.70036  | 5.17297  | 6.84311  | 32.271   | 2.48334  | 4.87888  | 11.4304  | -1.32326 | -0.08654 | 1.23672  | 0.427724 | 0.919229 | 0.302573 |         |
| RP11-981P6.1__anti | 0.987115 | 1.9744   | 0        | 3.95724  | 3.71736  | 83.3709  | 3.09797  | 11.372   | 0        | -4.94218 | -2.28865 | 2.653526 | 0.390531 | 0.310155 | 0.471957 |         |
| RP11-982M15.6__lin | 0.024007 | 0.254833 | 0.240106 | 0.190739 | 0.965773 | 1.19175  | 0.164414 | 0        | 0.312943 | -2.17794 | 0.120516 | 2.298453 | 0.119522 | 0.919944 | 0.172938 |         |
| RP11-982M15.7__lin | 0        | 0        | 0.311944 | 0        | 3.99559  | 1.94289  | 0        | 0        | 0        | -4.25073 | #DIV/0!  | #DIV/0!  | 0.247276 | 0.42265  | 0.228305 |         |
| RP11-982M15.8__lin | 0.015247 | 0.215732 | 0.183281 | 2.18873  | 3.30667  | 0.537727 | 0.052394 | 0.041716 | 0.074811 | -3.8643  | 1.294186 | 5.158484 | 0.145222 | 0.320289 | 0.13831  |         |
| RP11-983C2.2__linc | 0        | 0        | 0.635296 | 0        | 0.066844 | 1.21804  | 0        | 0        | 0.045437 | -1.01614 | 3.805493 | 4.82163  | 0.360617 | 0.42265  | 0.390727 |         |
| RP11-983P16.4__an  | 113.326  | 74.2968  | 38.891   | 38.2267  | 17.4124  | 44.6309  | 36.9901  | 75.7026  | 53.3043  | 1.175709 | 0.448442 | -0.72727 | 0.227777 | 0.550315 | 0.356221 |         |
| RP11-989E6.10__lin | 0.048674 | 0.487871 | 0.140266 | 0.381086 | 1.12782  | 7.66459  | 0.918516 | 0.26324  | 0.205808 | -3.76065 | -1.03573 | 2.724917 | 0.351013 | 0.54444  | 0.402863 |         |
| RP11-989F5.1__linc | 0        | 0        | 0        | 0.204168 | 1.62085  | 6.33043  | 0        | 0        | 0        | #NUM!    | #DIV/0!  | #DIV/0!  | 0.279799 | #DIV/0!  | 0.279799 |         |
| RP11-98D18.3__anti | 25.0015  | 13.8261  | 12.7698  | 10.53    | 4.44454  | 4.3674   | 7.22114  | 13.8618  | 14.8201  | 1.415566 | 0.523192 | -0.89237 | 0.029275 | 0.49374  | 0.338443 |         |
| RP11-98D18.9__anti | 0.560327 | 0.77762  | 0.362307 | 5.94125  | 1.34085  | 1.05302  | 0        | 0.646091 | 0.393049 | -2.29345 | 0.71036  | 3.003813 | 0.297675 | 0.33777  | 0.300048 |         |
| RP11-98J23.2__pse  | 1.77447  | 1.27792  | 1.1052   | 1.0957   | 0.750214 | 0.66813  | 0.66888  | 2.2601   | 13.3022  | 0.725738 | -1.96495 | -2.69069 | 0.016158 | 0.432646 | 0.377935 |         |
| RP11-98J9.2__lincR | 0        | 0        | 0.97839  | 1.72503  | 7.49466  | 6.97073  | 0.714951 | 0        | 0        | -4.04859 | 0.452565 | 4.501152 | 0.099172 | 0.874485 | 0.131282 |         |
| RP11-98O2.1__lincR | 0        | 0        | 0.193079 | 0.10191  | 33.9655  | 10.749   | 0.305991 | 0        | 0.167445 | -7.85869 | -1.29398 | 6.564714 | 0.275664 | 0.472863 | 0.280378 |         |
| RP11-996F15.2__an  | 0        | 0        | 0        | 12.3893  | 7.60632  | 11.7411  | 12.7796  | 0        | 0        | #NUM!    | #NUM!    | 1.31231  | 0.019468 | 0.42265  | 0.217946 |         |
| RP11-999E24.3__se  | 0.922493 | 7.05907  | 0.066658 | 0.484358 | 0.353898 | 0.411396 | 0.390808 | 0.667046 | 1.37051  | 2.687144 | 1.728685 | -0.95846 | 0.416621 | 0.50428  | 0.328382 |         |
| RP11-99E15.2__linc | 2.64686  | 1.35753  | 1.24279  | 9.32396  | 13.7645  | 714.898  | 0.247036 | 1.25864  | 1.05602  | -7.13591 | 1.034443 | 8.170351 | 0.407326 | 0.356416 | 0.405333 |         |
| RP11-99H8.1__lincR | 0        | 0        | 0        | 0        | 0        | 0        | 0        | 0        | 0        | #DIV/0!  | #DIV/0!  | #DIV/0!  | #DIV/0!  | #DIV/0!  | #DIV/0!  |         |
| RP11-99J16__A.2__  | 63.679   | 0.742207 | 2.75034  | 5.53222  | 31.5562  | 7.46588  | 1.22371  | 4.33751  | 3.05451  | 0.592286 | 2.962805 | 2.37052  | 0.802077 | 0.459598 | 0.256528 |         |
| RP11-99L13.1__linc | 0        | 1.5747   | 0        | 0        | 5.44142  | 24.4279  | 0.419568 | 0        | 0        | -4.24552 | 1.9081   | 6.153616 | 0.339484 | 0.590758 | 0.320706 |         |
| RP11-9G1.3__lincR  | 0.021391 | 0.050441 | 0.146303 | 0.109231 | 25.6035  | 0.249924 | 0.079559 | 0.008062 | 0.104419 | -6.89507 | 0.183818 | 7.078892 | 0.418332 | 0.819067 | 0.418708 |         |
| RP11-9L18.2__pseu  | 8.73815  | 40.2943  | 3.00148  | 5.67336  | 3.59843  | 5.61664  | 2.50776  | 21.5259  | 6.71341  | 1.805261 | 0.759004 | -1.04626 | 0.419066 | 0.389192 | 0.497967 |         |
| RP13-137A17.4__lin | 0.033847 | 0.134859 | 0.238511 | 0.145615 | 1.74229  | 0.569549 | 1.30098  | 0.049354 | 0.135207 | -2.5933  | -1.86712 | 0.726176 | 0.280408 | 0.511406 | 0.732172 |         |
| RP13-137A17.5__lin | 0        | 0        | 1.1038   | 0        | 2.325    | 3.61973  | 0.530073 | 0        | 0        | -2.42913 | 1.058216 | 3.487348 | 0.184138 | 0.729484 | 0.278796 |         |
| RP13-15E13.1__linc | 4.12771  | 3.22364  | 5.21448  | 0.657127 | 1.23343  | 10.7105  | 1.87506  | 4.94869  | 5.14922  | -0.00404 | 0.069725 | 0.073764 | 0.997008 | 0.879393 | 0.946658 |         |
| RP13-20L14.1__linc | 0.083793 | 0.735853 | 0.333298 | 0        | 0        | 4.12933  | 0        | 0        | 0.179598 | -1.84059 | 2.682479 | 4.523065 | 0.555689 | 0.257047 | 0.42265  |         |
| RP13-238F13.3__an  | 0        | 0        | 0        | 0        | 0.143248 | 0.955771 | 0        | 0        | 0.109767 | #NUM!    | #NUM!    | 3.3237   | 0.343451 | 0.42265  | 0.334366 |         |
| RP13-259N13.2__lin | 0        | 0        | 0.45011  | 0        | 1.69273  | 1.17302  | 0.69903  | 0        | 0.193866 | -2.67056 | -0.98821 | 1.682349 | 0.242288 | 0.656632 | 0.451523 |         |
| RP13-270P17.2__an  | 367.119  | 232.209  | 321.2    | 76.577   | 86.1566  | 88.9858  | 143.963  | 287.937  | 264.373  | 1.870645 | 0.402809 | -1.46784 | 0.033659 | 0.453525 | 0.069088 |         |
| RP13-30A9.2__antis | 0        | 0        | 0.787413 | 0        | 3.01183  | 2.11525  | 0        | 0        | 0        | -2.70294 | #DIV/0!  | #DIV/0!  | 0.238805 | 0.42265  | 0.195708 |         |
| RP13-329D4.3__linc | 0        | 0        | 0        | 0        | 0.433864 | 3.89832  | 0        | 0        | 0        | #NUM!    | #DIV/0!  | #DIV/0!  | 0.362331 | #DIV/0!  | 0.362331 |         |
| RP13-379L11.1__lin | 0        | 0.07588  | 0.046429 | 0.183463 | 3.15604  | 9.93164  | 0        | 0        | 0        | -6.76162 | #DIV/0!  | #DIV/0!  | 0.26692  | 0.206192 | 0.264861 |         |
| RP13-379L11.2__lin | 0        | 0        | 0.032687 | 0.065031 | 7.79299  | 3.32629  | 0.064008 | 0.03568  | 0.035538 | -8.41855 | -2.04859 | 6.369964 | 0.23902  | 0.192747 | 0.242955 |         |

|                     |          |          |          |          |          |          |          |          |          |          |          |          |          |          |          |
|---------------------|----------|----------|----------|----------|----------|----------|----------|----------|----------|----------|----------|----------|----------|----------|----------|
| RP13-379O24.2__lin  | 0        | 0.064438 | 0.273534 | 0.127059 | 0.102238 | 0.274624 | 0.093767 | 0.014933 | 0.118999 | -0.5763  | 0.569777 | 1.146073 | 0.277265 | 0.660291 | 0.121438 |
| RP13-392I16.1__linc | 0.098981 | 0        | 0.098754 | 0        | 0.36531  | 1.53689  | 0.433411 | 0        | 0.106902 | -3.26603 | -1.45023 | 1.815802 | 0.338263 | 0.408758 | 0.488838 |
| RP13-395E19.3__pri  | 0.413397 | 0.189291 | 1.19887  | 0.320612 | 0        | 1.21655  | 0.442804 | 1.31908  | 0.17771  | 0.228976 | -0.10651 | -0.33549 | 0.27842  | 0.947678 | 0.861985 |
| RP13-39P12.3__anti  | 0.97126  | 0        | 1.07131  | 1.61693  | 8.97501  | 31.5457  | 1.59518  | 0        | 0        | -4.36665 | 0.356666 | 4.723318 | 0.271476 | 0.791651 | 0.286314 |
| RP13-455A7.1__linc  | 0        | 0        | 0        | 0        | 2.72391  | 0        | 0        | 0        | 0        | #NUM!    | #DIV/0!  | #DIV/0!  | 0.42265  | #DIV/0!  | 0.42265  |
| RP13-487K5.1__linc  | 0.074415 | 0        | 0.148132 | 0        | 0        | 2.92647  | 0        | 0        | 0        | -3.71698 | #DIV/0!  | #DIV/0!  | 0.438315 | 0.224918 | 0.42265  |
| RP13-514E23.1__se   | 0.077829 | 0        | 0.194689 | 0.154823 | 0.10378  | 0.167195 | 0.114331 | 0.78249  | 0.021158 | -0.64382 | -1.75211 | -1.10829 | 0.330156 | 0.535532 | 0.591384 |
| RP13-516M14.1__lin  | 0.186306 | 0.251139 | 0.505638 | 0.950768 | 0.283131 | 4.5521   | 0.559709 | 0.609416 | 0.375631 | -2.61711 | -0.71192 | 1.905187 | 0.321042 | 0.348955 | 0.418007 |
| RP13-516M14.2__ar   | 0        | 0.011327 | 0.173172 | 0.166144 | 0.13372  | 0.322436 | 0.075418 | 0.021017 | 0.115161 | -1.754   | -0.1977  | 1.556299 | 0.007534 | 0.836423 | 0.061939 |
| RP13-516M14.4__lin  | 0        | 0.07906  | 0.159355 | 0.17797  | 0.074146 | 6.1631   | 0.131384 | 0        | 0.118537 | -4.74995 | -0.068   | 4.681954 | 0.406269 | 0.958133 | 0.41118  |
| RP13-539F13.3__lin  | 0.031458 | 0        | 0.042005 | 2.37984  | 25.6035  | 4.36319  | 0.396705 | 0        | 0.034278 | -8.78239 | -2.55255 | 6.229836 | 0.285319 | 0.43499  | 0.292447 |
| RP13-578N3.3__anti  | 0.027572 | 3.0928   | 0.618874 | 0.073157 | 12.7412  | 44.9238  | 0.072023 | 0        | 0.7039   | -3.94871 | 2.268762 | 6.217468 | 0.31244  | 0.447086 | 0.285355 |
| RP13-614K11.1__lin  | 0.063096 | 0        | 0.162506 | 0        | 0.154469 | 1.9352   | 0.06193  | 0.071223 | 0.029475 | -3.21143 | 0.472195 | 3.683621 | 0.395562 | 0.759065 | 0.417055 |
| RP13-614K11.2__lin  | 0        | 0        | 0.194759 | 0        | 0.205885 | 10.4561  | 0        | 0.076641 | 0        | -5.77464 | 1.3455   | 7.120142 | 0.411184 | 0.674168 | 0.415558 |
| RP13-631K18.3__lin  | 0        | 0.115161 | 2.20063  | 0        | 0        | 3.19433  | 0        | 0        | 0        | -0.46401 | #DIV/0!  | #DIV/0!  | 0.492953 | 0.393267 | 0.42265  |
| RP13-653N12.1__lin  | 0        | 0.113376 | 2.6329   | 1.26563  | 3.31183  | 1277.67  | 0.436578 | 0        | 0        | -8.86698 | 2.653165 | 11.52015 | 0.42063  | 0.500795 | 0.420781 |
| RP13-726E6.1__linc  | 0.67758  | 1.58765  | 3.9296   | 5.76384  | 12.2695  | 26.9831  | 1.07775  | 3.41151  | 0.913489 | -2.86132 | 0.197371 | 3.058686 | 0.135011 | 0.871084 | 0.181113 |
| RP13-726E6.2__pro   | 0.042444 | 0.721829 | 1.31647  | 4.04278  | 2.0652   | 19.5466  | 1.74196  | 0.104457 | 0.223599 | -3.62405 | 0.007457 | 3.631503 | 0.272646 | 0.997069 | 0.303787 |
| RP13-735L24.1__lin  | 0.045511 | 0.061564 | 0        | 0        | 1.36799  | 3.16341  | 0.353703 | 0.232881 | 0.06875  | -5.40326 | -2.61361 | 2.789654 | 0.253728 | 0.118886 | 0.324972 |
| RP13-766D20.2__an   | 0.352655 | 1.05052  | 1.09357  | 7.15084  | 3.44466  | 4.50384  | 2.29492  | 0.510744 | 1.50822  | -2.59637 | -0.78894 | 1.807426 | 0.087467 | 0.49024  | 0.029419 |
| RP13-81N3.2__lincR  | 0        | 0        | 0        | 0        | 0        | 1.86473  | 0        | 0        | 0        | #NUM!    | #DIV/0!  | #DIV/0!  | 0.42265  | #DIV/0!  | 0.42265  |
| RP13-895J2.2__anti  | 0        | 0.041366 | 0.081963 | 0.124375 | 0.350317 | 0.156853 | 0.091766 | 0.012787 | 0.089167 | -2.35638 | -0.65146 | 1.704918 | 0.140449 | 0.578345 | 0.268984 |
| RP13-941N14.1__lin  | 0        | 0        | 1.22201  | 0        | 6.43933  | 30.778   | 0        | 0        | 0        | -4.92865 | #DIV/0!  | #DIV/0!  | 0.312979 | 0.42265  | 0.316653 |
| RP13-977J11.2__linc | 0.083784 | 0.049406 | 0.729048 | 0.222115 | 0.977134 | 0.947644 | 0.761051 | 0.605467 | 0.091077 | -1.31609 | -0.75743 | 0.55866  | 0.229902 | 0.682885 | 0.630863 |
| RP13-98N21.3__pse   | 0.085578 | 0.019323 | 0.245852 | 0.029058 | 0.105233 | 0.119527 | 0.109866 | 0.009957 | 0.032733 | 0.466662 | 1.201112 | 0.73445  | 0.65642  | 0.467036 | 0.615678 |
| RP3-322G13.5__ant   | 0        | 0.733948 | 0.853094 | 0        | 0.516042 | 0.557292 | 0.260479 | 0.042705 | 0.224037 | 0.564241 | 1.589862 | 1.025621 | 0.192731 | 0.369348 | 0.503301 |
| RP3-322G13.7__ant   | 6.25516  | 4.67061  | 4.36009  | 2.69356  | 1.49447  | 1.25493  | 2.80446  | 4.44079  | 7.00565  | 1.489734 | 0.101145 | -1.38859 | 0.001863 | 0.862769 | 0.213111 |
| RP3-333H23.8__anti  | 0        | 0.030228 | 0.034204 | 0.02268  | 0.291926 | 6.20309  | 0.117204 | 0        | 0.074368 | -6.66043 | -1.57203 | 5.088401 | 0.396581 | 0.424411 | 0.404799 |
| RP3-380B4.1__lincR  | 0        | 0        | 0        | 0        | 0        | 0        | 0.171484 | 0        | 0        | #DIV/0!  | #NUM!    | #NUM!    | #DIV/0!  | 0.42265  | 0.42265  |
| RP3-388M5.9__antis  | 0.169345 | 0.024965 | 0.105886 | 0        | 1.35071  | 1.53428  | 0.082892 | 0.138632 | 0.161068 | -3.26459 | -0.3499  | 2.914688 | 0.237114 | 0.689279 | 0.21202  |
| RP3-395M20.7__ant   | 0.13045  | 0.04397  | 0.503531 | 140.256  | 2.55969  | 3.45368  | 0.363617 | 3.73499  | 0.484387 | -7.75323 | -2.75704 | 4.996193 | 0.400359 | 0.390396 | 0.415398 |
| RP3-395M20.8__pro   | 7.21714  | 5.20368  | 0        | 3.88737  | 3.70832  | 5.21441  | 2.9139   | 11.2825  | 6.77241  | -0.04452 | -0.75548 | -0.71096 | 0.96469  | 0.509744 | 0.395617 |
| RP3-395P12.2__linc  | 0        | 0        | 0        | 0        | 0.269365 | 1.9304   | 0.248631 | 0.11095  | 0        | #NUM!    | #NUM!    | 2.612961 | 0.3484   | 0.237487 | 0.45594  |
| RP3-400N23.6__anti  | 8.68132  | 5.78881  | 3.33145  | 20.6801  | 7.68692  | 43.3722  | 4.16394  | 6.56463  | 8.31086  | -2.01076 | -0.09698 | 1.913772 | 0.255767 | 0.894401 | 0.215271 |
| RP3-414A15.10__an   | 0.883231 | 0        | 1.6952   | 0        | 0.442336 | 284.234  | 0.321792 | 0        | 0        | -6.78669 | 3.002293 | 9.788978 | 0.423554 | 0.270408 | 0.422406 |



|                     |          |          |          |          |          |          |          |          |          |          |          |          |          |          |          |
|---------------------|----------|----------|----------|----------|----------|----------|----------|----------|----------|----------|----------|----------|----------|----------|----------|
| RP3-414A15.2__anti  | 0        | 0        | 0        | 0        | 2.72391  | 1.07387  | 0        | 0        | 0        | #NUM!    | #DIV/0!  | #DIV/0!  | 0.251131 | #DIV/0!  | 0.251131 |
| RP3-416H24.1__anti  | 0        | 0        | 0        | 0        | 1.4356   | 0.388265 | 0.529754 | 0        | 0        | #NUM!    | #NUM!    | 1.783604 | 0.291941 | 0.42265  | 0.526732 |
| RP3-436N22.3__anti  | 0.232053 | 0.01303  | 1.35158  | 0.191034 | 23.1095  | 62.8934  | 0.292715 | 0.02417  | 0.048157 | -5.75445 | 2.128923 | 7.883378 | 0.256961 | 0.455064 | 0.259859 |
| RP3-437I16.1__lincF | 0        | 0        | 0.167391 | 0        | 1.19989  | 248.682  | 0.150279 | 0        | 0.030342 | -10.5438 | -0.10974 | 10.43407 | 0.419869 | 0.962445 | 0.420219 |
| RP3-439F8.1__antis  | 0.037785 | 0.059409 | 0.151331 | 0.172165 | 1.8418   | 11.5452  | 0.061765 | 0.04356  | 0.075943 | -5.76973 | 0.455276 | 6.22501  | 0.333673 | 0.518711 | 0.334729 |
| RP3-449O17.1__pse   | 5.08149  | 12.3908  | 10.7203  | 98.0749  | 11.9006  | 13.7863  | 2.15879  | 52.3899  | 21.2701  | -2.13418 | -1.42724 | 0.706939 | 0.406988 | 0.336944 | 0.734817 |
| RP3-467K16.2__anti  | 0        | 0        | 1.63598  | 0        | 3.20138  | 16.032   | 0        | 0        | 0        | -3.55539 | #DIV/0!  | #DIV/0!  | 0.311088 | 0.42265  | 0.32077  |
| RP3-467K16.4__linc  | 0.011095 | 0.019622 | 0.106215 | 0.029562 | 0.199197 | 0.278243 | 0.107381 | 0.042514 | 0.571178 | -1.88854 | -2.39669 | -0.50816 | 0.143176 | 0.290558 | 0.637764 |
| RP3-473L9.4__lincR  | 0.775673 | 0.367895 | 2.14572  | 2.07425  | 3.75238  | 7.02459  | 0.545673 | 1.63665  | 0.432794 | -1.96606 | 0.3309   | 2.296958 | 0.091739 | 0.818455 | 0.166429 |
| RP3-476K8.3__antis  | 0        | 1.01619  | 0        | 3.2585   | 1.49898  | 3.65856  | 0.477815 | 0.296162 | 0        | -3.04997 | 0.392808 | 3.442779 | 0.132175 | 0.838173 | 0.071159 |
| RP3-477O4.5__pseu   | 0        | 0.747152 | 1.39484  | 0.274721 | 2.96584  | 10.749   | 0.360223 | 0        | 0        | -2.70733 | 2.571991 | 5.279317 | 0.288784 | 0.366104 | 0.294331 |
| RP3-508I15.9__antis | 35.2965  | 14.3834  | 22.8577  | 10.3113  | 4.29096  | 12.0899  | 10.5069  | 21.8625  | 22.8652  | 1.442313 | 0.393157 | -1.04916 | 0.087856 | 0.61419  | 0.200562 |
| RP3-510D11.1__linc  | 0.103415 | 0        | 0.732897 | 0        | 0.276029 | 57.3175  | 0.151988 | 0.037655 | 0.131265 | -6.10572 | 1.381882 | 7.487604 | 0.420896 | 0.507958 | 0.421785 |
| RP3-513G18.2__linc  | 0        | 0.037044 | 1.19723  | 0        | 3.2883   | 2.42136  | 0.245406 | 0        | 0.27245  | -2.20974 | 1.253039 | 3.462782 | 0.256243 | 0.568019 | 0.238415 |
| RP3-514A23.2__linc  | 0        | 0        | 0        | 2.96916  | 9.65899  | 637.067  | 0.333365 | 0        | 0        | #NUM!    | #NUM!    | 10.92844 | 0.411279 | 0.42265  | 0.41158  |
| RP3-518E13.2__anti  | 0.121852 | 0.674627 | 1.23471  | 0.091764 | 313.778  | 33.1522  | 0.150729 | 0.08121  | 0.069357 | -7.41656 | 2.753071 | 10.16963 | 0.36713  | 0.236462 | 0.36539  |
| RP3-522D1.1__lincR  | 0.267701 | 0.236981 | 0.466615 | 1.64643  | 5.45266  | 1178.23  | 0.644627 | 0        | 0.575965 | -10.2531 | -0.3296  | 9.923491 | 0.419423 | 0.68606  | 0.419492 |
| RP3-522J7.6__lincR  | 0        | 0        | 0.079197 | 0.02624  | 1.02507  | 3.05192  | 0.096889 | 0        | 0.043033 | -5.69516 | -0.8211  | 4.874063 | 0.261186 | 0.660993 | 0.28032  |
| RP4-530I15.9__antis | 0        | 0        | 0        | 0        | 0        | 4.78433  | 0        | 0        | 0        | #NUM!    | #DIV/0!  | #DIV/0!  | 0.42265  | #DIV/0!  | 0.42265  |
| RP4-534N18.2__linc  | 5.39189  | 1.59248  | 8.22569  | 3.60778  | 1.68304  | 637.067  | 3.02216  | 5.04535  | 5.98787  | -5.40028 | 0.113903 | 5.514183 | 0.424207 | 0.8596   | 0.425198 |
| RP4-536B24.4__linc  | 0.258412 | 0        | 0.707966 | 0.253273 | 0        | 5.44021  | 0        | 0        | 0.069534 | -2.55865 | 3.796799 | 6.355451 | 0.423277 | 0.24821  | 0.396094 |
| RP4-543J13.1__lincI | 0        | 0        | 0        | 0        | 4.81581  | 6.90069  | 0.322505 | 0        | 0        | #NUM!    | #NUM!    | 5.183076 | 0.196131 | 0.42265  | 0.218832 |
| RP4-544H6.2__lincR  | 0        | 0.258922 | 0.809162 | 0        | 6.79728  | 12.9739  | 0        | 0.143086 | 0        | -4.2103  | 2.900071 | 7.110373 | 0.218116 | 0.34666  | 0.222795 |
| RP4-550H1.4__lincR  | 0        | 0        | 1.04661  | 0.541877 | 2.39979  | 4.83086  | 0.852101 | 0        | 0        | -2.89266 | 0.296628 | 3.189287 | 0.139677 | 0.916791 | 0.260502 |
| RP4-553F4.2__antis  | 0        | 0        | 0.323026 | 0        | 0        | 10.4418  | 1.35589  | 0.116486 | 0        | -5.01458 | -2.18842 | 2.826152 | 0.42265  | 0.525574 | 0.50822  |
| RP4-561L24.3__lincI | 0.120502 | 0.18271  | 0.120599 | 0.045693 | 0.459486 | 41.6074  | 0.185535 | 0.188043 | 0.074916 | -6.63469 | -0.08167 | 6.553018 | 0.419853 | 0.821089 | 0.420836 |
| RP4-564M11.2__ant   | 1.26479  | 1.30653  | 0        | 0        | 3.55248  | 8.95383  | 0        | 0        | 0.42403  | -2.28208 | 2.600271 | 4.882346 | 0.384385 | 0.336052 | 0.245053 |
| RP4-564O4.1__lincR  | 0        | 0        | 0        | 0        | 8.20933  | 345.829  | 1.36487  | 0        | 0        | #NUM!    | #NUM!    | 8.018998 | 0.409111 | 0.42265  | 0.411394 |
| RP4-568F9.6__lincR  | 0        | 0        | 1.09986  | 0.237362 | 7.03655  | 37.9399  | 0.674379 | 0.182215 | 0.670795 | -5.36137 | -0.47375 | 4.887624 | 0.320944 | 0.698913 | 0.334444 |
| RP4-575N6.4__antis  | 0.538515 | 0        | 1.28225  | 0.138817 | 0        | 1.02785  | 0        | 0        | 0        | 0.642152 | #DIV/0!  | #DIV/0!  | 0.202932 | 0.244131 | 0.350571 |
| RP4-575N6.5__sens   | 0.125153 | 0        | 0        | 0        | 2.26498  | 0        | 0        | 0        | 0        | -4.17773 | #DIV/0!  | #DIV/0!  | 0.455382 | 0.42265  | 0.42265  |
| RP4-583K8.1__lincR  | 0        | 0        | 0        | 0        | 0        | 0        | 0.374535 | 0        | 0        | #DIV/0!  | #NUM!    | #NUM!    | #DIV/0!  | 0.42265  | 0.42265  |
| RP4-586O15.1__linc  | 0.051281 | 0        | 0        | 0        | 0        | 0.645569 | 0        | 0        | 0        | -3.65407 | #DIV/0!  | #DIV/0!  | 0.470181 | 0.42265  | 0.42265  |
| RP4-591L5.2__lincR  | 0        | 0        | 0        | 0        | 2.99663  | 4.65944  | 0.239995 | 0        | 0        | #NUM!    | #NUM!    | 4.995528 | 0.202105 | 0.42265  | 0.227841 |
| RP4-598G3.1__lincR  | 0        | 0        | 0.037538 | 0.019957 | 0.200799 | 11.7979  | 0.044151 | 0        | 0.065377 | -8.32269 | -1.54486 | 6.777833 | 0.411899 | 0.203692 | 0.414046 |

|                     |          |          |          |          |          |          |          |          |          |          |          |          |          |          |          |
|---------------------|----------|----------|----------|----------|----------|----------|----------|----------|----------|----------|----------|----------|----------|----------|----------|
| RP4-601K24.1__linc  | 2.70887  | 3.99022  | 3.01393  | 17.2614  | 36.9853  | 189.071  | 2.30053  | 2.47982  | 3.21295  | -4.64678 | 0.281129 | 4.927906 | 0.28835  | 0.370491 | 0.283509 |
| RP4-601P9.2__lincR  | 0.023522 | 0        | 1.44258  | 0.249218 | 6.70575  | 9.93209  | 0.046031 | 0        | 0        | -3.52586 | 4.993251 | 8.519112 | 0.177206 | 0.431727 | 0.188763 |
| RP4-605O3.4__proc   | 8.24459  | 7.28874  | 3.71262  | 37.8597  | 8.89605  | 21.3265  | 4.06057  | 13.9069  | 9.73618  | -1.82272 | -0.52552 | 1.297203 | 0.18261  | 0.5057   | 0.353878 |
| RP4-610C12.1__anti  | 0        | 0        | 0.836968 | 0        | 19.599   | 14.8874  | 1.41881  | 0        | 1.61617  | -5.36471 | -1.85844 | 3.506269 | 0.194382 | 0.216022 | 0.234207 |
| RP4-613B23.1__anti  | 17.2633  | 27.3409  | 10.6746  | 44.9289  | 25.6035  | 72.3795  | 15.8937  | 31.5666  | 31.7575  | -1.37033 | -0.5191  | 0.85123  | 0.252056 | 0.35852  | 0.268716 |
| RP4-614C15.2__linc  | 0        | 0        | 3.06017  | 0        | 1.49489  | 4.78433  | 0.42224  | 0.067308 | 0        | -1.03697 | 2.64409  | 3.681064 | 0.185566 | 0.519677 | 0.33288  |
| RP4-614C15.3__linc  | 0        | 0        | 0        | 0        | 10.5435  | 1.6585   | 0.056943 | 0        | 0        | #NUM!    | #NUM!    | 7.743378 | 0.339948 | 0.42265  | 0.343038 |
| RP4-616B8.4__antis  | 0        | 0        | 1.6918   | 0        | 0        | 3.279    | 0.523271 | 0        | 0        | -0.9547  | 1.692929 | 2.647626 | 0.42265  | 0.61903  | 0.520848 |
| RP4-635E18.7__anti  | 0        | 0        | 0        | 0        | 0        | 4.03184  | 0        | 0        | 0        | #NUM!    | #DIV/0!  | #DIV/0!  | 0.42265  | #DIV/0!  | 0.42265  |
| RP4-639F20.1__anti  | 63.567   | 13.8941  | 16.485   | 15.2646  | 12.0927  | 9.17144  | 10.7341  | 43.1484  | 26.5495  | 1.362801 | 0.224064 | -1.13874 | 0.321895 | 0.872561 | 0.293438 |
| RP4-640H8.2__lincR  | 0.014188 | 0.050195 | 0.611906 | 0.113093 | 1.07836  | 2.15961  | 0.800524 | 0.07754  | 0.06179  | -2.30891 | -0.4748  | 1.834111 | 0.170064 | 0.841499 | 0.425661 |
| RP4-647C14.2__anti  | 0        | 0        | 0        | 0        | 0        | 25.4267  | 0.875236 | 0        | 0        | #NUM!    | #NUM!    | 4.860528 | 0.42265  | 0.42265  | 0.442853 |
| RP4-655J12.5__lincI | 0        | 1.49087  | 0.836556 | 1.23014  | 0        | 2.23381  | 0.948779 | 0        | 0        | -0.57368 | 1.294591 | 1.868274 | 0.724876 | 0.592894 | 0.355025 |
| RP4-656G21.1__linc  | 0        | 0        | 0        | 0        | 1.06856  | 1.94321  | 0        | 0        | 0        | #NUM!    | #DIV/0!  | #DIV/0!  | 0.215899 | #DIV/0!  | 0.215899 |
| RP4-660H19.1__linc  | 0        | 0        | 0.070579 | 0        | 1.51206  | 27.1076  | 0        | 0        | 0.097974 | -8.66355 | -0.47317 | 8.190386 | 0.391312 | 0.42265  | 0.391281 |
| RP4-663N10.1__anti  | 0.154243 | 0.012393 | 2.05073  | 3.28465  | 21.0558  | 99.567   | 3.10844  | 0        | 0.331096 | -5.80427 | -0.63337 | 5.170905 | 0.296085 | 0.793574 | 0.314387 |
| RP4-665J23.1__lincI | 0.871079 | 0.511807 | 0.615928 | 0.273732 | 4.62212  | 79.1978  | 0.760129 | 2.44943  | 1.55695  | -5.39478 | -1.25379 | 4.140992 | 0.39768  | 0.259154 | 0.410353 |
| RP4-666F24.3__linc  | 0.16083  | 0        | 0.159983 | 0        | 0        | 0        | 0        | 0.08677  | 0.689956 | #DIV/0!  | -1.27567 | #NUM!    | 0.183506 | 0.530461 | 0.355121 |
| RP4-668G5.1__antis  | 230.76   | 0        | 0.545544 | 153.242  | 2.15671  | 30.5084  | 0.266807 | 0.522444 | 0.02693  | 0.315218 | 8.146694 | 7.831476 | 0.684721 | 0.422662 | 0.314946 |
| RP4-669L17.10__linc | 3.429    | 1.52207  | 4.63558  | 3.87503  | 0.883482 | 1.24327  | 0.753967 | 0.409995 | 0.577389 | 0.675636 | 2.46082  | 1.785184 | 0.405352 | 0.091582 | 0.237576 |
| RP4-669L17.2__lincI | 0        | 0.201209 | 0.096841 | 0.50478  | 0.027631 | 0.086369 | 0.669894 | 0.130914 | 0.085145 | -1.05387 | -1.57168 | -0.5178  | 0.653163 | 0.496157 | 0.20799  |
| RP4-672N11.1__linc  | 0        | 0        | 0        | 0        | 2.90372  | 1.299    | 1.08939  | 0        | 0        | #NUM!    | #NUM!    | 1.947803 | 0.237217 | 0.42265  | 0.465418 |
| RP4-678D15.1__anti  | 4.8767   | 3.78191  | 3.92555  | 16.1224  | 35.8449  | 39.0984  | 1.74398  | 0.017634 | 5.16122  | -2.8553  | 0.862174 | 3.717473 | 0.073469 | 0.352861 | 0.054884 |
| RP4-680D5.2__antis  | 0        | 0.085334 | 2.78068  | 0.027503 | 1.17692  | 6.50642  | 3.18174  | 0.022617 | 0.056328 | -1.42784 | -0.18613 | 1.241714 | 0.279537 | 0.945607 | 0.646697 |
| RP4-683M8.2__lincF  | 0        | 0        | 0        | 0.170849 | 1.45311  | 1079.69  | 0        | 0        | 0        | #NUM!    | #DIV/0!  | #DIV/0!  | 0.421782 | #DIV/0!  | 0.421782 |
| RP4-684O24.5__ant   | 0        | 0.01986  | 1.72453  | 5.3467   | 11.7611  | 44.4507  | 14.4987  | 0.118283 | 0.903941 | -5.14116 | -3.15342 | 1.987744 | 0.226248 | 0.452296 | 0.422128 |
| RP4-686C3.7__antis  | 0        | 0        | 0        | 0        | 0.568518 | 3.23218  | 0.299212 | 0        | 0        | #NUM!    | #NUM!    | 3.667024 | 0.331362 | 0.42265  | 0.386546 |
| RP4-694A7.4__antis  | 3.23436  | 2.43229  | 7.88629  | 3.76148  | 5.42229  | 13.3078  | 2.78592  | 3.15237  | 7.70192  | -0.73078 | -0.00926 | 0.721519 | 0.169468 | 0.941959 | 0.165821 |
| RP4-694B14.5__anti  | 4.40544  | 5.74729  | 4.56214  | 37.3213  | 110.574  | 41.1977  | 2.57539  | 5.10419  | 3.78628  | -3.68375 | 0.35993  | 4.043679 | 0.130743 | 0.102122 | 0.124812 |
| RP4-697P8.3__lincR  | 0.014996 | 0        | 0.075057 | 3.00976  | 4.78967  | 9.77181  | 0.454823 | 0.68329  | 0.130589 | -7.60823 | -3.81644 | 3.791791 | 0.100638 | 0.16453  | 0.127382 |
| RP4-704D23.1__linc  | 0        | 0        | 0.06392  | 1.42725  | 1.36851  | 1.57315  | 0.373401 | 0        | 0.138123 | -6.09487 | -3.00047 | 3.0944   | 0.000808 | 0.321191 | 0.008255 |
| RP4-705D16.3__anti  | 23.0832  | 23.9914  | 13.1014  | 11.6705  | 5.07596  | 6.68169  | 9.74856  | 15.7419  | 19.6183  | 1.360945 | 0.415781 | -0.94516 | 0.077772 | 0.487702 | 0.258294 |
| RP4-705F19.1__linc  | 0        | 0        | 0        | 0        | 1.28156  | 5.0016   | 0        | 0        | 0        | #NUM!    | #DIV/0!  | #DIV/0!  | 0.297412 | #DIV/0!  | 0.297412 |
| RP4-705O1.1__lincR  | 1.60318  | 0.120179 | 0.203906 | 0        | 29.1989  | 13.0311  | 0.432979 | 0        | 1.33193  | -4.45364 | 0.126961 | 4.580603 | 0.268797 | 0.942486 | 0.257353 |
| RP4-706G24.1__ant   | 0        | 0        | 0        | 0.783316 | 5.89884  | 2.51534  | 0        | 0        | 0        | #NUM!    | #DIV/0!  | #DIV/0!  | 0.178043 | #DIV/0!  | 0.178043 |

|                     |          |          |          |          |          |          |          |          |          |          |          |          |          |          |          |
|---------------------|----------|----------|----------|----------|----------|----------|----------|----------|----------|----------|----------|----------|----------|----------|----------|
| RP4-710M16.2__linc  | 2.57496  | 0        | 3.59915  | 0        | 6.43933  | 8.24722  | 0        | 0        | 0.156644 | -1.25019 | 5.30067  | 6.550862 | 0.411323 | 0.191859 | 0.188725 |
| RP4-712E4.1__lincR  | 0        | 0        | 0.218724 | 0.135291 | 0.46164  | 0.103057 | 0.266483 | 0        | 0.295758 | -1.67822 | -1.36208 | 0.316142 | 0.438406 | 0.285025 | 0.846222 |
| RP4-717I23.3__proc  | 56.244   | 19.851   | 21.3811  | 17.2401  | 6.42202  | 62.8203  | 11.551   | 26.4647  | 21.8084  | 0.172642 | 0.704322 | 0.53168  | 0.891447 | 0.518868 | 0.665413 |
| RP4-718J7.4__lincR  | 0        | 0.097008 | 0        | 0        | 4.37351  | 25.7566  | 0        | 0        | 0        | -8.27889 | #DIV/0!  | #DIV/0!  | 0.335881 | 0.42265  | 0.334146 |
| RP4-723E3.1__lincR  | 0.072908 | 2.33309  | 1.34376  | 2.82938  | 663.926  | 605.201  | 5.41995  | 0.035996 | 0.158892 | -8.40604 | -0.58245 | 7.823589 | 0.182579 | 0.818689 | 0.186049 |
| RP4-724E16.2__anti  | 9.15929  | 23.3914  | 11.3177  | 8.31468  | 7.44425  | 26.7109  | 9.04271  | 12.997   | 6.3225   | 0.046743 | 0.629212 | 0.582468 | 0.963596 | 0.223747 | 0.614774 |
| RP4-726F1.1__lincR  | 0        | 0        | 0        | 0        | 0        | 0.145394 | 0.300534 | 0        | 0        | #NUM!    | #NUM!    | -1.04756 | 0.42265  | 0.42265  | 0.731711 |
| RP4-726N1.2__antis  | 0        | 0        | 0        | 0        | 1.96831  | 4.2537   | 0.40311  | 0        | 0.232237 | #NUM!    | #NUM!    | 3.291764 | 0.23357  | 0.211521 | 0.282502 |
| RP4-734C18.1__linc  | 0.052536 | 0.757175 | 0.963039 | 72.35    | 23.6564  | 24.4279  | 0.940228 | 0        | 0.220489 | -6.08611 | 0.610973 | 6.697086 | 0.136994 | 0.744499 | 0.128599 |
| RP4-735C1.4__antis  | 7.81092  | 19.4471  | 49.562   | 11.859   | 6.39295  | 25.5918  | 49.6428  | 15.3603  | 11.869   | 0.809111 | -0.00098 | -0.81009 | 0.310009 | 0.999467 | 0.537012 |
| RP4-735C1.6__lincR  | 0        | 1.55742  | 0        | 0        | 4.87021  | 31.5457  | 0        | 0        | 0        | -4.54734 | #DIV/0!  | #DIV/0!  | 0.365508 | 0.42265  | 0.341319 |
| RP4-737A23.2__anti  | 0        | 0        | 0        | 0        | 19.0987  | 0.599975 | 0        | 0        | 0        | #NUM!    | #DIV/0!  | #DIV/0!  | 0.404806 | #DIV/0!  | 0.404806 |
| RP4-737E23.2__linc  | 0        | 0.182341 | 0.34864  | 0        | 0        | 0        | 0        | 0        | 0.188792 | #DIV/0!  | 1.491863 | #NUM!    | 0.220824 | 0.185262 | 0.42265  |
| RP4-738P15.1__linc  | 0.027785 | 0.440751 | 0.325536 | 0.096502 | 4.57227  | 0.702649 | 0.21708  | 0.092604 | 0.897854 | -2.75796 | -0.60473 | 2.153236 | 0.363084 | 0.65708  | 0.464051 |
| RP4-740C4.6__proc   | 0.039814 | 0.10955  | 1.44397  | 0.35272  | 0.156103 | 3.14206  | 0.104115 | 0.101558 | 0.101164 | -1.1962  | 2.376505 | 3.572701 | 0.312267 | 0.447503 | 0.367305 |
| RP4-742J24.2__anti  | 0        | 0        | 0        | 4.66287  | 8.71464  | 12.3309  | 4.88264  | 40.7335  | 2.81318  | #NUM!    | #NUM!    | -0.91364 | 0.06077  | 0.320046 | 0.607298 |
| RP4-749H3.1__lincR  | 0.135136 | 0.070668 | 1.62891  | 0.22633  | 2.63248  | 17.1771  | 1.45247  | 0        | 0.132046 | -3.44896 | 0.211513 | 3.660474 | 0.333138 | 0.927602 | 0.383892 |
| RP4-749H3.2__lincR  | 0        | 0        | 0        | 0        | 0.61708  | 9.71453  | 0        | 0        | 0        | #NUM!    | #DIV/0!  | #DIV/0!  | 0.387211 | #DIV/0!  | 0.387211 |
| RP4-753D10.3__sen   | 0        | 0        | 1.0477   | 0        | 7.42011  | 3.86578  | 0.19612  | 0        | 0.108875 | -3.42922 | 1.780368 | 5.209591 | 0.255279 | 0.552909 | 0.237938 |
| RP4-753D10.5__anti  | 1.04506  | 1.29623  | 0.531364 | 0        | 2.37086  | 6.92298  | 0.736913 | 0.235579 | 0.877624 | -1.69389 | 0.634769 | 2.328659 | 0.435301 | 0.489972 | 0.33407  |
| RP4-753D4.2__antis  | 0        | 0.024159 | 0.712883 | 0        | 1.88419  | 3.38334  | 0.180514 | 0        | 0.022271 | -2.83731 | 1.861799 | 4.699107 | 0.196262 | 0.568127 | 0.241942 |
| RP4-753M9.1__sens   | 0.037504 | 0.022115 | 0.857961 | 0.024874 | 0.751674 | 2.8495   | 0.446387 | 0        | 0.061184 | -1.98249 | 0.854225 | 2.836718 | 0.262737 | 0.735758 | 0.38308  |
| RP4-758J18.10__linc | 0        | 0        | 0.540127 | 2.55889  | 7.68692  | 3.57241  | 0.20509  | 0        | 0.08539  | -4.67713 | 0.89486  | 5.57199  | 0.113797 | 0.711066 | 0.108715 |
| RP4-758J18.13__linc | 0.664603 | 0.963957 | 0.790735 | 1.61681  | 2.3152   | 1.41534  | 0.977054 | 0.663483 | 1.01209  | -1.14424 | -0.13284 | 1.011402 | 0.043347 | 0.723227 | 0.14357  |
| RP4-760C5.3__lincR  | 0.63106  | 0        | 0.872722 | 0        | 4.7725   | 0.458098 | 0        | 0        | 0.452255 | -1.79838 | 1.733387 | 3.531768 | 0.55469  | 0.199401 | 0.421943 |
| RP4-760C5.5__lincR  | 0.001045 | 0.331067 | 0.62836  | 0.54881  | 4.80393  | 16.2644  | 0.18883  | 0.024022 | 0.034192 | -4.49229 | 1.958978 | 6.451266 | 0.267096 | 0.407065 | 0.270942 |
| RP4-764O22.1__linc  | 0        | 0        | 2.03614  | 0        | 2.76222  | 2.87807  | 2.25736  | 0        | 0        | -1.46993 | -0.1488  | 1.321133 | 0.279402 | 0.957986 | 0.57388  |
| RP4-764O22.2__linc  | 1.28345  | 0        | 0.666584 | 0.025232 | 5.40359  | 7.99132  | 0.413874 | 0        | 0.093919 | -2.78283 | 1.941188 | 4.724017 | 0.279309 | 0.200274 | 0.221577 |
| RP4-765H13.1__linc  | 0        | 0        | 0.608625 | 0        | 1.23163  | 142.556  | 0        | 0        | 0        | -7.88417 | #DIV/0!  | #DIV/0!  | 0.417662 | 0.42265  | 0.417683 |
| RP4-771M4.3__lincF  | 0        | 0        | 0.091493 | 0.238548 | 0        | 0        | 0.088791 | 0        | 0.492489 | -1.38255 | -2.6675  | -1.28495 | 0.66769  | 0.311486 | 0.615591 |
| RP4-773A18.4__anti  | 0.121932 | 0        | 0.874903 | 0        | 3.99794  | 0        | 0.335044 | 0.167194 | 0        | -2.00383 | 0.988984 | 2.992814 | 0.576812 | 0.688215 | 0.475149 |
| RP4-773N10.4__anti  | 0.973655 | 1.89126  | 1.49242  | 2.25248  | 12.7842  | 129.986  | 1.00027  | 1.63081  | 1.2917   | -5.05669 | 0.15157  | 5.208258 | 0.370249 | 0.239485 | 0.369389 |
| RP4-773N10.6__anti  | 0.078818 | 0.18969  | 0.433745 | 0.317558 | 4.25276  | 11.2564  | 0.683571 | 0.043028 | 0.235685 | -4.49423 | -0.45447 | 4.039756 | 0.244801 | 0.770109 | 0.272901 |
| RP4-775C13.1__pse   | 4.49002  | 8.96983  | 10.7192  | 3.38464  | 5.74166  | 4.59196  | 9.95496  | 9.02524  | 9.72471  | 0.81766  | -0.24754 | -1.0652  | 0.138842 | 0.529609 | 0.034401 |
| RP4-781K5.4__lincR  | 0.14153  | 0.039934 | 3.02039  | 1.30783  | 2.90074  | 19.1934  | 1.46099  | 0.782153 | 9.23731  | -2.86965 | -1.8422  | 1.02745  | 0.291696 | 0.253015 | 0.323891 |

|                     |          |          |          |          |          |          |          |          |          |          |          |          |          |          |          |
|---------------------|----------|----------|----------|----------|----------|----------|----------|----------|----------|----------|----------|----------|----------|----------|----------|
| RP4-781K5.7__lincR  | 0.305704 | 1.24556  | 0.627732 | 0.375991 | 0.762183 | 6.9218   | 0        | 0.20902  | 0        | -1.88711 | 3.381951 | 5.269062 | 0.462159 | 0.089937 | 0.348185 |
| RP4-781K5.8__lincR  | 0.122443 | 0.18949  | 1.01477  | 0.122259 | 0.377243 | 1.65924  | 0.79571  | 0.075376 | 0.200261 | -0.70235 | 0.30842  | 1.010765 | 0.284366 | 0.861293 | 0.616024 |
| RP4-782G3.1__lincR  | 0        | 0.078805 | 0.066501 | 0        | 1.94612  | 4.61532  | 0.772965 | 0        | 0        | -5.49685 | -2.41131 | 3.085537 | 0.24665  | 0.535299 | 0.340591 |
| RP4-782L23.2__anti  | 5.22595  | 1.51138  | 0.416965 | 2.5765   | 2.96361  | 4.35137  | 2.55661  | 0.978668 | 3.87357  | -0.46738 | -0.05044 | 0.416937 | 0.68143  | 0.966596 | 0.297975 |
| RP4-784A16.4__anti  | 0.086991 | 0.045589 | 0.135528 | 0.218614 | 0.1863   | 0.259548 | 0.180231 | 0.137461 | 0.495108 | -1.30937 | -1.60009 | -0.29071 | 0.001331 | 0.178188 | 0.648446 |
| RP4-785G19.5__sen   | 43.4613  | 17.8843  | 20.1502  | 49.7813  | 7.16349  | 43.0168  | 19.55    | 26.7878  | 39.4121  | -0.29465 | -0.07341 | 0.221239 | 0.590485 | 0.923173 | 0.773477 |
| RP4-788L20.3__lincI | 0        | 0.046781 | 0.232917 | 0        | 16.1967  | 9.92495  | 0.853856 | 0.058777 | 0.201782 | -6.54523 | -1.99435 | 4.550887 | 0.207863 | 0.436021 | 0.23447  |
| RP4-791M13.3__ant   | 0.426911 | 0.22627  | 0.602132 | 1.16006  | 8.04379  | 0.510838 | 1.41258  | 0.379703 | 2.30749  | -2.95212 | -1.7075  | 1.244624 | 0.378018 | 0.168769 | 0.588394 |
| RP4-792G4.2__antis  | 0.014513 | 0        | 0        | 0.038556 | 4.18192  | 1.77119  | 0        | 0.103708 | 0        | -8.68949 | -2.83713 | 5.852358 | 0.240156 | 0.508235 | 0.235467 |
| RP4-794H19.2__linc  | 1.45177  | 0.383625 | 2.36543  | 2.59172  | 136.332  | 284.403  | 1.89442  | 1.80185  | 12.9501  | -6.65496 | -1.98646 | 4.668492 | 0.227128 | 0.327737 | 0.224993 |
| RP4-796I8.1__lincRf | 0        | 0        | 1.6079   | 0        | 4.83083  | 1.91913  | 0        | 0        | 0        | -2.0697  | #DIV/0!  | #DIV/0!  | 0.386725 | 0.42265  | 0.250282 |
| RP4-798A10.7__linc  | 0.310047 | 0.04536  | 0.175878 | 0.451224 | 7.90597  | 64.6727  | 0.599945 | 0.196461 | 0.462801 | -7.10286 | -1.24496 | 5.8579   | 0.355789 | 0.0338   | 0.35927  |
| RP4-798P15.3__pro   | 13.699   | 0.381874 | 7.31493  | 105.568  | 22.2062  | 28.2325  | 78.2716  | 14.0375  | 4.57205  | -2.86621 | -2.17889 | 0.68732  | 0.196425 | 0.340251 | 0.078289 |
| RP4-799D16.1__linc  | 0.059383 | 0        | 1.83932  | 1.52439  | 5.74601  | 109.907  | 0.943164 | 0.064015 | 0.28059  | -5.94754 | 0.56014  | 6.507677 | 0.38505  | 0.803277 | 0.390491 |
| RP4-799P18.2__anti  | 0        | 0        | 0.035394 | 0        | 0        | 3.35987  | 0.103946 | 0        | 0.134659 | -6.56878 | -2.75307 | 3.815709 | 0.42265  | 0.18372  | 0.441547 |
| RP4-800J21.3__anti  | 0        | 0        | 0        | 0        | 38.848   | 4.34109  | 0        | 0        | 0        | #NUM!    | #DIV/0!  | #DIV/0!  | 0.362104 | #DIV/0!  | 0.362104 |
| RP4-803J11.2__anti  | 0.146698 | 1.26277  | 0        | 158.855  | 3.82661  | 0        | 0.576444 | 0.312627 | 0        | -6.85076 | 0.66478  | 7.515537 | 0.4134   | 0.711883 | 0.409977 |
| RP4-809F18.1__linc  | 0        | 0        | 0.309111 | 0.195662 | 0.420681 | 1.4689   | 0.173585 | 0.032262 | 0.09567  | -2.75402 | 0.035887 | 2.789905 | 0.179079 | 0.984172 | 0.278462 |
| RP4-811H24.9__linc  | 0        | 0.060657 | 0.358932 | 0.20239  | 2.44211  | 1.1536   | 0.614136 | 0.114312 | 0.38845  | -3.17823 | -1.41245 | 1.76578  | 0.225555 | 0.347693 | 0.376985 |
| RP4-813D12.3__linc  | 0        | 0.064068 | 0.706019 | 3.63376  | 6.38932  | 14.0592  | 1.28727  | 0.029609 | 1.59092  | -4.96681 | -1.91683 | 3.049972 | 0.115439 | 0.210089 | 0.138586 |
| RP4-816N1.6__antis  | 17.1527  | 11.6005  | 15.1195  | 3.84869  | 4.40254  | 9.22224  | 7.08071  | 18.5237  | 14.2423  | 1.328157 | 0.138863 | -1.18929 | 0.061206 | 0.810305 | 0.157472 |
| RP5-1004I9.1__lincF | 0        | 0        | 0.370474 | 0.076302 | 1.07623  | 3.57014  | 0.474139 | 0        | 0        | -3.67216 | -0.35594 | 3.316221 | 0.255854 | 0.900532 | 0.345894 |
| RP5-1007G16.1__ar   | 0        | 0        | 0.228915 | 6.67452  | 1.55573  | 20.8676  | 0        | 0        | 0.024867 | -6.98996 | 3.202519 | 10.19248 | 0.233567 | 0.42265  | 0.234966 |
| RP5-1007M22.2__ar   | 3.29132  | 23.8211  | 0.845184 | 13.5625  | 6.02167  | 15.0513  | 3.07854  | 1.20919  | 3.38063  | -0.30901 | 1.866251 | 2.17526  | 0.845674 | 0.485203 | 0.051203 |
| RP5-1010E17.1__lin  | 0        | 0        | 0        | 0        | 15.4373  | 38.9422  | 0.525389 | 0        | 0.177541 | #NUM!    | #NUM!    | 6.273538 | 0.25052  | 0.268203 | 0.257341 |
| RP5-1010E17.2__lin  | 0        | 0.032492 | 0.146144 | 0.091346 | 0.350887 | 0.081842 | 0.161834 | 0.014225 | 0        | -1.55275 | 0.020966 | 1.573713 | 0.408934 | 0.9932   | 0.43171  |
| RP5-1021I20.1__ant  | 0.136261 | 0.28543  | 0.911007 | 0.098024 | 2.79266  | 13.294   | 0.522044 | 0.040447 | 0.362331 | -3.60221 | 0.527102 | 4.129309 | 0.321309 | 0.670217 | 0.333972 |
| RP5-1021I20.2__linc | 0        | 0.101744 | 0.583266 | 0        | 0        | 0        | 0.056204 | 0        | 0        | #DIV/0!  | 3.60738  | #NUM!    | 0.332024 | 0.389575 | 0.42265  |
| RP5-1021I20.5__ant  | 11.1403  | 7.31724  | 6.40463  | 4.66035  | 3.34993  | 4.98663  | 5.22282  | 9.43886  | 6.08376  | 0.935784 | 0.261158 | -0.67463 | 0.113694 | 0.622402 | 0.279901 |
| RP5-1022J11.2__linc | 0        | 0        | 0.453653 | 0        | 16.4193  | 3.46918  | 0        | 0.140808 | 0        | -5.4542  | 1.68786  | 7.14206  | 0.327857 | 0.619747 | 0.314991 |
| RP5-1024G6.5__ant   | 0        | 1.73754  | 0        | 1.98571  | 1.62162  | 14.6577  | 0        | 1.64341  | 0        | -3.39397 | 0.080354 | 3.47432  | 0.354913 | 0.42265  | 0.35122  |
| RP5-1024G6.7__ant   | 0        | 0.019077 | 0.10534  | 46.2255  | 2.9538   | 0        | 0.095299 | 0.026557 | 0.044097 | -8.62673 | -0.41559 | 8.211134 | 0.388544 | 0.788765 | 0.387797 |
| RP5-1024N4.2__linc  | 0        | 0        | 0        | 0        | 0        | 0        | 0        | 0        | 0        | #DIV/0!  | #DIV/0!  | #DIV/0!  | #DIV/0!  | #DIV/0!  | #DIV/0!  |
| RP5-1027G4.3__ant   | 0        | 1.3625   | 0.271808 | 7.22078  | 9.20424  | 10.8358  | 0.964648 | 1.71982  | 0.11081  | -4.06008 | -0.77431 | 3.285765 | 0.01414  | 0.35625  | 0.02569  |
| RP5-1028K7.2__linc  | 1.75561  | 0.234783 | 1.675    | 14.6595  | 2.66647  | 4.79977  | 6.35308  | 0.50624  | 1.58937  | -2.59369 | -1.20476 | 1.388926 | 0.210377 | 0.400462 | 0.138272 |

|                     |          |          |          |          |         |          |          |          |          |          |          |          |          |          |          |
|---------------------|----------|----------|----------|----------|---------|----------|----------|----------|----------|----------|----------|----------|----------|----------|----------|
| RP5-1028L10.1__an   | 0        | 0        | 0        | 0        | 3.07329 | 41.9523  | 0        | 0        | 0        | #NUM!    | #DIV/0!  | #DIV/0!  | 0.382011 | #DIV/0!  | 0.382011 |
| RP5-1029K10.2__an   | 2.43358  | 0.050254 | 0.978897 | 0.034035 | 12.2058 | 23.1152  | 1.03169  | 0.278659 | 0.660157 | -3.35193 | 0.813344 | 4.165278 | 0.274161 | 0.408163 | 0.24252  |
| RP5-1029K10.4__an   | 0.191022 | 0.054785 | 0.144843 | 0.151338 | 0.48275 | 0.767635 | 0.140594 | 0.457882 | 0.129547 | -1.84325 | -0.89811 | 0.945145 | 0.22857  | 0.520862 | 0.390976 |
| RP5-1031D4.2__linc  | 0.888371 | 0        | 1.83488  | 0        | 33.3774 | 28.6779  | 0.141821 | 0        | 0        | -4.51015 | 4.263187 | 8.773339 | 0.200415 | 0.247635 | 0.1877   |
| RP5-1031J8.1__lincI | 0        | 0        | 0.412935 | 0        | 0       | 0.653104 | 0        | 0        | 1.23256  | -0.6614  | -1.57767 | -0.91627 | 0.42265  | 0.42265  | 0.42265  |
| RP5-1033H22.2__an   | 2.71147  | 0        | 0.603224 | 1.86799  | 17.8739 | 61.0596  | 2.62122  | 2.08886  | 6.43604  | -4.60743 | -1.74959 | 2.85784  | 0.290439 | 0.270286 | 0.292772 |
| RP5-1039K5.13__an   | 3.13984  | 1.34963  | 2.17443  | 1.70704  | 1.23303 | 66.378   | 1.19008  | 2.78391  | 2.98887  | -3.37879 | -0.06331 | 3.31548  | 0.436724 | 0.932413 | 0.432255 |
| RP5-1039K5.16__an   | 0        | 0        | 0.275676 | 0.323942 | 4.63846 | 1.10624  | 0.11976  | 0        | 0.03324  | -4.46033 | 0.849444 | 5.309772 | 0.291908 | 0.738068 | 0.283281 |
| RP5-1042I8.7__sens  | 1.02395  | 0.162616 | 0.183884 | 0.365279 | 0.04896 | 0.175242 | 0        | 0.025074 | 0.199748 | 1.217132 | 2.607796 | 1.390664 | 0.325476 | 0.359867 | 0.426142 |
| RP5-1043L13.1__linc | 0.024832 | 0        | 3.52164  | 2.73685  | 19.7037 | 579.152  | 2.1313   | 0.081452 | 4.08792  | -7.40626 | -0.82912 | 6.577137 | 0.400525 | 0.271507 | 0.402689 |
| RP5-1051D14.1__lin  | 0        | 0        | 0        | 0        | 6.15384 | 3.66381  | 0.300281 | 0        | 0        | #NUM!    | #NUM!    | 5.030993 | 0.208562 | 0.42265  | 0.233442 |
| RP5-1052I5.1__lincF | 0.643126 | 0.183088 | 0.585747 | 1.40084  | 5.48259 | 73.2321  | 0.564347 | 1.40368  | 0.506112 | -5.82631 | -0.80923 | 5.017083 | 0.376202 | 0.499683 | 0.384636 |
| RP5-1057I20.2__linc | 0.140089 | 0        | 0.372521 | 0        | 1.73823 | 6.49511  | 1.37142  | 0.137952 | 0        | -4.00554 | -1.55801 | 2.447529 | 0.299796 | 0.555209 | 0.431486 |
| RP5-1061H20.4__lin  | 1.82122  | 3.83296  | 1.27591  | 4.46305  | 21.4949 | 23.0318  | 1.62089  | 1.37453  | 3.62663  | -2.82153 | 0.065596 | 2.88713  | 0.137267 | 0.947805 | 0.129423 |
| RP5-1061H20.5__an   | 0        | 0        | 0.749144 | 0        | 2.12304 | 1.38136  | 0        | 0        | 0        | -2.22585 | #DIV/0!  | #DIV/0!  | 0.281886 | 0.42265  | 0.201198 |
| RP5-1063M23.1__lin  | 0        | 0        | 1.17131  | 0        | 1.29259 | 2.30831  | 0        | 0        | 0        | -1.62023 | #DIV/0!  | #DIV/0!  | 0.185173 | 0.42265  | 0.214168 |
| RP5-1063M23.2__lin  | 0.058582 | 0.011513 | 2.28757  | 2.02119  | 2.19375 | 8.64782  | 0.474336 | 0.053405 | 0.063845 | -2.44777 | 1.994701 | 4.44247  | 0.134144 | 0.549356 | 0.211139 |
| RP5-1065P14.2__lin  | 0        | 0        | 0.244514 | 0        | 4.0063  | 11.0557  | 0        | 0        | 0.06607  | -5.94485 | 1.88785  | 7.832702 | 0.258009 | 0.42265  | 0.259825 |
| RP5-1069C8.2__linc  | 0        | 3.91185  | 0.328941 | 3.27182  | 4.94674 | 103.801  | 0.229868 | 0.06237  | 0.372233 | -4.72327 | 2.674054 | 7.397328 | 0.39895  | 0.464606 | 0.379364 |
| RP5-1070A16.1__lin  | 0        | 0.094755 | 0        | 0        | 0       | 91.5893  | 0.131326 | 0        | 0        | -9.91676 | -0.47087 | 9.445883 | 0.423247 | 0.869619 | 0.423478 |
| RP5-1071N3.1__anti  | 0.036533 | 0        | 0        | 0.080942 | 1.40588 | 17.7928  | 0        | 0        | 0        | -9.04366 | #DIV/0!  | #DIV/0!  | 0.377532 | 0.42265  | 0.376355 |
| RP5-1073O3.7__ant   | 0        | 0        | 0        | 0        | 0       | 1.57812  | 0        | 0        | 0        | #NUM!    | #DIV/0!  | #DIV/0!  | 0.42265  | #DIV/0!  | 0.42265  |
| RP5-1074L1.1__anti  | 6.96677  | 3.13846  | 4.00838  | 7.036    | 6.02855 | 6.28752  | 4.6556   | 7.38799  | 7.97207  | -0.4554  | -0.50404 | -0.04864 | 0.178433 | 0.455129 | 0.880924 |
| RP5-1085F17.4__an   | 2.52896  | 3.89546  | 1.57679  | 6.98311  | 6.54187 | 7.86844  | 1.9403   | 1.87882  | 1.85656  | -1.41888 | 0.495425 | 1.914302 | 0.051327 | 0.366481 | 0.005823 |
| RP5-1086K13.1__lin  | 1.14075  | 0.458916 | 0.908011 | 1.05313  | 3.11806 | 1.78847  | 3.17728  | 0.507233 | 0.654419 | -1.24888 | -0.79099 | 0.45789  | 0.288845 | 0.484966 | 0.73654  |
| RP5-1096D14.3__an   | 0        | 0        | 0        | 0        | 0.6947  | 1.04959  | 0        | 0        | 0        | #NUM!    | #DIV/0!  | #DIV/0!  | 0.199896 | #DIV/0!  | 0.199896 |
| RP5-1096J16.1__an   | 0.022792 | 0        | 0.319176 | 0        | 3.27258 | 0        | 0.31227  | 0.02487  | 0        | -3.25849 | 0.020514 | 3.279009 | 0.485434 | 0.993542 | 0.480558 |
| RP5-1097P24.1__lin  | 0        | 0        | 0        | 0.244815 | 0       | 0        | 0        | 0        | 0        | #NUM!    | #DIV/0!  | #DIV/0!  | 0.42265  | #DIV/0!  | 0.42265  |
| RP5-1100I6.1__lincF | 0        | 0        | 0        | 0        | 0       | 4.1419   | 0.0693   | 0        | 0        | #NUM!    | #NUM!    | 5.901296 | 0.42265  | 0.42265  | 0.432389 |
| RP5-1100I6.2__lincF | 0.01251  | 0.045125 | 0.089076 | 0        | 11.6852 | 30.3928  | 0.147923 | 0        | 0.111102 | -8.16395 | -0.82012 | 7.343831 | 0.254244 | 0.551009 | 0.256149 |
| RP5-1103B4.3__anti  | 0.37422  | 0.068386 | 0.536336 | 0        | 1.81153 | 4.70427  | 0.477383 | 0.06338  | 0.236746 | -2.73465 | 0.332363 | 3.06701  | 0.29483  | 0.63301  | 0.312807 |
| RP5-1103G7.4__ant   | 0.980915 | 10.5217  | 2.15043  | 10.2416  | 17.7302 | 48.6777  | 2.96044  | 2.55809  | 3.36037  | -2.48905 | 0.62077  | 3.109824 | 0.242025 | 0.667696 | 0.190599 |
| RP5-1109J22.2__linc | 0        | 0        | 0.113346 | 0        | 4.74425 | 0.539063 | 0.05541  | 0        | 0.061519 | -5.54264 | -0.0449  | 5.497737 | 0.37336  | 0.972734 | 0.374482 |
| RP5-1112F19.2__lin  | 0.012791 | 0.075418 | 4.14501  | 1.56188  | 65.0109 | 317.01   | 1.86162  | 0.041954 | 0.278613 | -6.50164 | 0.95598  | 7.45762  | 0.314577 | 0.723702 | 0.318949 |
| RP5-1114G22.2__lin  | 0        | 0        | 0        | 0        | 1.33341 | 0        | 0        | 0        | 0        | #NUM!    | #DIV/0!  | #DIV/0!  | 0.42265  | #DIV/0!  | 0.42265  |

|                     |          |          |          |          |          |          |          |          |          |          |          |          |          |          |          |
|---------------------|----------|----------|----------|----------|----------|----------|----------|----------|----------|----------|----------|----------|----------|----------|----------|
| RP5-1119A7.10__an   | 0        | 0        | 0        | 0        | 2.2441   | 79.6536  | 0        | 0        | 0        | #NUM!    | #DIV/0!  | #DIV/0!  | 0.406619 | #DIV/0!  | 0.406619 |
| RP5-1119D9.4__anti  | 1.17881  | 0        | 0        | 0        | 20.6458  | 21.7577  | 0        | 0        | 0        | -5.16878 | #DIV/0!  | #DIV/0!  | 0.207087 | 0.42265  | 0.183784 |
| RP5-1119O21.2__lin  | 0        | 0        | 0        | 0        | 7.68692  | 0        | 0.035981 | 0        | 0        | #NUM!    | #NUM!    | 7.739043 | 0.42265  | 0.42265  | 0.425358 |
| RP5-1121H13.4__an   | 0        | 0        | 1.31866  | 0        | 13.3513  | 72.3795  | 1.20278  | 0        | 0        | -6.02267 | 0.1327   | 6.155369 | 0.325968 | 0.962515 | 0.33702  |
| RP5-1125A11.1__lin  | 1.78135  | 0.843429 | 2.0688   | 4.46612  | 3.12348  | 116.861  | 1.01594  | 0.992798 | 1.66541  | -4.72874 | 0.353279 | 5.08202  | 0.397962 | 0.32965  | 0.395054 |
| RP5-1125N11.1__lin  | 0        | 0        | 2.20034  | 0        | 0.978496 | 5.23961  | 0        | 0        | 0        | -1.49875 | #DIV/0!  | #DIV/0!  | 0.273495 | 0.42265  | 0.326474 |
| RP5-1142A6.8__anti  | 0        | 0        | 0.068517 | 0.036374 | 0        | 0.510206 | 0        | 0.014962 | 0.089424 | -2.99589 | -0.60739 | 2.388503 | 0.377213 | 0.19449  | 0.395905 |
| RP5-1166F10.1__lin  | 0        | 0        | 0.054682 | 0        | 4.61454  | 2.30858  | 0.099287 | 0        | 0        | -6.98421 | -0.86054 | 6.123672 | 0.227837 | 0.772802 | 0.236596 |
| RP5-1177I5.3__antis | 0        | 0        | 0        | 0        | 0        | 1.11075  | 0        | 0        | 0.253712 | #NUM!    | #NUM!    | 2.13027  | 0.42265  | 0.42265  | 0.42265  |
| RP5-1177M21.1__lin  | 0        | 0        | 0.150927 | 0        | 1.88537  | 3.8363   | 0.660357 | 0        | 0        | -5.24451 | -2.1294  | 3.115118 | 0.223055 | 0.565801 | 0.324399 |
| RP5-1180C10.2__an   | 1.63093  | 1.42242  | 1.25838  | 2.42209  | 0.833082 | 7.37237  | 3.62313  | 1.27553  | 3.41654  | -1.30147 | -0.94748 | 0.353985 | 0.411207 | 0.214012 | 0.678905 |
| RP5-1184F4.5__anti  | 0        | 0        | 0        | 0        | 0        | 4.2581   | 0        | 0        | 0        | #NUM!    | #DIV/0!  | #DIV/0!  | 0.42265  | #DIV/0!  | 0.42265  |
| RP5-1185H19.2__lin  | 0        | 0.04277  | 0.108654 | 0        | 0        | 15.6548  | 0        | 0        | 0.039274 | -6.69187 | 1.946945 | 8.638811 | 0.42424  | 0.20556  | 0.42265  |
| RP5-1185K9.1__linc  | 0        | 0        | 0.19624  | 0        | 1.51206  | 61.9657  | 1.44334  | 0        | 0        | -8.33749 | -2.87872 | 5.458768 | 0.408694 | 0.505696 | 0.422338 |
| RP5-1195D24.1__lin  | 0.121547 | 0        | 0.687776 | 0        | 0        | 0        | 0.950506 | 0        | 0.087694 | #DIV/0!  | -0.3593  | #NUM!    | 0.330985 | 0.870875 | 0.37205  |
| RP5-1198O20.4__lin  | 0.078186 | 0.452082 | 0.145406 | 0.932807 | 3.14104  | 131.998  | 0.284683 | 0.170706 | 1.04677  | -7.65382 | -1.15264 | 6.501187 | 0.407269 | 0.506329 | 0.406856 |
| RP5-821D11.7__anti  | 6.81621  | 3.76967  | 0        | 0        | 1.0906   | 3.98651  | 0.903729 | 2.269    | 1.4323   | 1.060062 | 1.200859 | 0.140797 | 0.618577 | 0.448911 | 0.90775  |
| RP5-827L5.2__lincR  | 0        | 0        | 0.155972 | 0        | 1.24594  | 1.55717  | 0        | 0        | 0.084104 | -4.16767 | 0.891034 | 5.058703 | 0.184904 | 0.42265  | 0.186337 |
| RP5-827O9.1__lincR  | 0        | 0        | 0.144685 | 0.23878  | 0.115128 | 11.9185  | 0        | 0.039406 | 0.078447 | -6.40636 | 0.295924 | 6.702284 | 0.405446 | 0.799004 | 0.407446 |
| RP5-836N10.1__linc  | 0.10208  | 0.023554 | 0.349704 | 0        | 0.330165 | 0.378109 | 0.088007 | 0.08722  | 0        | -0.57535 | 1.439728 | 2.015081 | 0.585437 | 0.51292  | 0.327999 |
| RP5-839B4.8__lincR  | 0.031298 | 0        | 0.156405 | 0        | 7.62861  | 34.3314  | 0.09172  | 0        | 0        | -7.80442 | 1.033144 | 8.837563 | 0.311252 | 0.669495 | 0.312669 |
| RP5-843L14.1__lincI | 0        | 7.28874  | 0.338883 | 0        | 2.61345  | 51.5045  | 0.538218 | 0        | 0        | -2.8268  | 3.824971 | 6.651773 | 0.477582 | 0.440565 | 0.400191 |
| RP5-855F14.1__linc  | 0.144363 | 0.048636 | 1.58478  | 0.048007 | 0.071119 | 0.197144 | 0.107612 | 0.123706 | 0.109891 | 2.490847 | 2.381349 | -0.1095  | 0.393453 | 0.438551 | 0.878011 |
| RP5-855F14.2__linc  | 0.22677  | 0        | 0        | 0        | 0        | 1.14219  | 0        | 0.243148 | 0        | -2.3325  | -0.1006  | 2.231896 | 0.546135 | 0.97156  | 0.555515 |
| RP5-857K21.2__linc  | 0        | 0.126717 | 0.176984 | 0        | 0.860687 | 0.1654   | 0.373146 | 0        | 0.261214 | -1.75643 | -1.06265 | 0.693779 | 0.431833 | 0.52626  | 0.760159 |
| RP5-857K21.4__linc  | 366.655  | 826.535  | 606.714  | 1281.84  | 616.816  | 351.914  | 258.794  | 835.619  | 854.231  | -0.32237 | -0.11455 | 0.20782  | 0.732551 | 0.682121 | 0.849795 |
| RP5-858B6.1__lincR  | 0        | 0        | 0.949804 | 0        | 0        | 1.98396  | 1.42528  | 0        | 0        | -1.06268 | -0.58554 | 0.477138 | 0.42265  | 0.839723 | 0.86796  |
| RP5-858B6.3__antis  | 0        | 0        | 0.415379 | 0        | 1.80925  | 12.0482  | 0.753238 | 0        | 0.325156 | -5.06009 | -1.37638 | 3.683706 | 0.34078  | 0.495412 | 0.379256 |
| RP5-860P4.2__lincR  | 0        | 0        | 0.337308 | 0.222363 | 0.446561 | 31.5457  | 0.164627 | 0        | 0        | -6.57751 | 1.034866 | 7.612371 | 0.41035  | 0.73438  | 0.41348  |
| RP5-864K19.4__anti  | 6.44745  | 3.78957  | 6.40199  | 3.52965  | 6.31487  | 476.842  | 3.94884  | 5.02148  | 9.50862  | -4.87035 | -0.15131 | 4.719039 | 0.423151 | 0.745423 | 0.421572 |
| RP5-865N13.2__linc  | 0.039966 | 0        | 0.080027 | 0.106218 | 0.08806  | 1.84665  | 0.595508 | 0        | 0.116056 | -4.0882  | -2.56804 | 1.52016  | 0.373437 | 0.386495 | 0.573745 |
| RP5-866L20.1__lincI | 0.155355 | 0        | 0        | 0        | 0        | 1.33004  | 0.24944  | 0        | 0        | -3.09783 | -0.68312 | 2.414705 | 0.49353  | 0.42265  | 0.538966 |
| RP5-882C2.2__antis  | 0.136872 | 0.06053  | 0        | 0.045414 | 0.365352 | 18.8331  | 0.167638 | 0.149516 | 0.42814  | -6.60712 | -1.91667 | 4.690445 | 0.416192 | 0.278406 | 0.419766 |
| RP5-884C9.2__lincR  | 0.184907 | 0.072691 | 1.86645  | 0.163421 | 5.9609   | 27.8677  | 0.993934 | 0.022428 | 0.089343 | -4.00031 | 0.941849 | 4.942157 | 0.309856 | 0.698993 | 0.331874 |
| RP5-886K2.3__antis  | 6.91977  | 4.12434  | 8.54819  | 3.58342  | 2.43173  | 19.6168  | 5.44424  | 9.86852  | 10.5589  | -0.38766 | -0.40109 | -0.01343 | 0.701552 | 0.421072 | 0.988337 |

|                     |          |          |          |          |          |          |          |          |          |          |          |          |          |          |          |
|---------------------|----------|----------|----------|----------|----------|----------|----------|----------|----------|----------|----------|----------|----------|----------|----------|
| RP5-887A10.1__linc  | 0.169621 | 0        | 0.337313 | 0        | 6.4423   | 2.40543  | 0.048755 | 0.559591 | 0        | -4.12544 | -0.26309 | 3.862343 | 0.288506 | 0.911885 | 0.251535 |
| RP5-890E16.2__pro   | 0.124621 | 0        | 0        | 5.47678  | 15.8626  | 17.5049  | 0.191919 | 0.356947 | 0.64463  | -8.28401 | -3.25957 | 5.024437 | 0.077074 | 0.165975 | 0.075305 |
| RP5-893G23.1__linc  | 0        | 0        | 0        | 0        | 0.430681 | 0.768486 | 0.265798 | 0        | 0        | #NUM!    | #NUM!    | 2.17363  | 0.214091 | 0.42265  | 0.414366 |
| RP5-896L10.1__anti  | 0.021684 | 0        | 0.154037 | 0.096427 | 10.7257  | 24.3389  | 0.113774 | 0.023733 | 0.088722 | -7.64455 | -0.3645  | 7.28005  | 0.236533 | 0.747237 | 0.239074 |
| RP5-898J17.1__linc  | 0        | 0        | 1.30799  | 0        | 7.85273  | 16.2644  | 1.86118  | 0        | 0        | -4.20463 | -0.50887 | 3.695769 | 0.220435 | 0.8596   | 0.292295 |
| RP5-901A4.1__antis  | 18.6945  | 5.53897  | 16.9331  | 8.40672  | 4.42755  | 6.51479  | 7.58421  | 25.5166  | 18.8278  | 1.08921  | -0.33506 | -1.42427 | 0.142162 | 0.729115 | 0.230188 |
| RP5-933E2.1__lincR  | 0        | 0        | 0        | 0        | 0        | 13.4916  | 0        | 0        | 0        | #NUM!    | #DIV/0!  | #DIV/0!  | 0.42265  | #DIV/0!  | 0.42265  |
| RP5-936J12.1__linc  | 0        | 0        | 0.318947 | 0        | 2.22593  | 5.62109  | 0        | 0        | 0        | -4.62076 | #DIV/0!  | #DIV/0!  | 0.244173 | 0.42265  | 0.250637 |
| RP5-940J5.6__antis  | 0        | 0        | 0        | 0        | 0        | 0        | 0        | 0        | 0        | #DIV/0!  | #DIV/0!  | #DIV/0!  | #DIV/0!  | #DIV/0!  | #DIV/0!  |
| RP5-943J3.1__sens   | 0.076452 | 0        | 0        | 0        | 0        | 0        | 0.221897 | 0        | 0        | #DIV/0!  | -1.53726 | #NUM!    | 0.42265  | 0.42265  | 0.42265  |
| RP5-944M2.2__lincF  | 0        | 0        | 0        | 0        | 0        | 0        | 0        | 0        | 0        | #DIV/0!  | #DIV/0!  | #DIV/0!  | #DIV/0!  | #DIV/0!  | #DIV/0!  |
| RP5-944M2.3__lincF  | 0        | 0        | 0.186334 | 0        | 9.54786  | 18.9706  | 0        | 0.202789 | 0        | -7.25786 | -0.12209 | 7.135773 | 0.223714 | 0.965503 | 0.226948 |
| RP5-951N9.1__antis  | 0        | 0        | 0.014409 | 0        | 0        | 0        | 0        | 0        | 0.047009 | #DIV/0!  | -1.70598 | #NUM!    | 0.42265  | 0.42265  | 0.42265  |
| RP5-952N6.1__lincR  | 0.065388 | 0.077118 | 0.086143 | 0.171176 | 1.84132  | 32.9764  | 0.064004 | 0        | 0.047378 | -7.25762 | 1.03762  | 8.295241 | 0.390703 | 0.215699 | 0.389444 |
| RP5-955M13.4__ant   | 0        | 0.319037 | 0.995701 | 0        | 1.17801  | 22.1566  | 5.34658  | 0        | 0        | -4.14962 | -2.02384 | 2.125783 | 0.399708 | 0.572715 | 0.544959 |
| RP5-963E22.5__linc  | 0.061334 | 0.072329 | 0.107442 | 0.142538 | 4.24689  | 1.43331  | 0.195389 | 0.067023 | 0.01669  | -4.59396 | -0.21113 | 4.382832 | 0.264392 | 0.864561 | 0.274847 |
| RP5-968D22.1__linc  | 0.227694 | 2.76777  | 0.194756 | 0.178932 | 4.60993  | 1.3977   | 0.465252 | 0.018409 | 1.20491  | -0.95548 | 0.917854 | 1.873335 | 0.213908 | 0.704977 | 0.436002 |
| RP5-968D22.3__linc  | 0.730063 | 2.58606  | 0.779495 | 2.39628  | 0        | 8.95383  | 1.43504  | 0.482334 | 1.6803   | -1.47055 | 0.187017 | 1.65757  | 0.520454 | 0.879943 | 0.391254 |
| RP5-968P14.2__anti  | 0.150445 | 0.035483 | 1.21283  | 0.059942 | 0.112532 | 4.84158  | 0.11798  | 0.032882 | 0.212891 | -1.84183 | 1.943116 | 3.784948 | 0.425099 | 0.40272  | 0.420085 |
| RP5-971N18.3__anti  | 0        | 0        | 20.9085  | 0        | 6.00391  | 0        | 0        | 0.102556 | 0        | 1.800115 | 7.671534 | 5.871419 | 0.604423 | 0.425489 | 0.42265  |
| RP5-977B1.7__antis  | 29.5458  | 36.5638  | 28.0971  | 18.3591  | 24.6504  | 31.5457  | 18.1472  | 26.248   | 29.053   | 0.337521 | 0.359103 | 0.021582 | 0.320701 | 0.221918 | 0.784682 |
| RP5-983L19.2__linc  | 0        | 0.036272 | 0.114218 | 0.184295 | 5.73327  | 2.59883  | 0.045305 | 0.050499 | 0.03459  | -5.8225  | 0.206793 | 6.029295 | 0.223209 | 0.874853 | 0.223604 |
| RP5-984P4.4__lincR  | 0        | 0        | 0        | 0        | 0        | 3.71904  | 0.264662 | 0        | 0.195732 | #NUM!    | #NUM!    | 3.013989 | 0.42265  | 0.192504 | 0.467519 |
| RP5-988G17.1__linc  | 0        | 0.044923 | 0        | 0        | 2.46136  | 167.196  | 0.037308 | 0        | 0        | -11.8829 | 0.267986 | 12.15086 | 0.414367 | 0.924706 | 0.414343 |
| RP5-991G20.1__ant   | 2.74239  | 2.1891   | 6.19395  | 2.45532  | 121.856  | 29.8184  | 1.15172  | 2.42665  | 292.979  | -3.79221 | -4.73638 | -0.94417 | 0.323121 | 0.425383 | 0.715461 |
| RP5-998H6.2__lincR  | 0        | 0.082608 | 0.028052 | 0        | 2.74675  | 3.37978  | 0.934929 | 0        | 0.061017 | -5.79086 | -3.16993 | 2.620931 | 0.188785 | 0.455763 | 0.32805  |
| RP5-998N21.7__anti  | 0.98214  | 0.996016 | 1.65894  | 1.43138  | 1.28124  | 21.0896  | 1.02568  | 2.46469  | 1.4195   | -2.71024 | -0.4329  | 2.277339 | 0.401051 | 0.506391 | 0.446596 |
| RP6-109B7.2__lincR  | 0.461362 | 3.08706  | 0        | 8.6198   | 1.76272  | 3.06158  | 0        | 0        | 1.18371  | -1.92172 | 1.583862 | 3.505586 | 0.351799 | 0.591024 | 0.213178 |
| RP6-109B7.3__antis  | 0        | 0        | 0        | 0        | 0.595301 | 1.16576  | 0        | 0        | 0        | #NUM!    | #DIV/0!  | #DIV/0!  | 0.22324  | #DIV/0!  | 0.22324  |
| RP6-206I17.1__lincF | 7.00367  | 89.3157  | 8.1803   | 23.9256  | 28.9959  | 216.364  | 17.0726  | 19.5652  | 52.4149  | -1.36564 | 0.230767 | 1.596405 | 0.562389 | 0.892816 | 0.366905 |
| RP6-42F4.1__proces  | 2.88187  | 2.30166  | 1.99861  | 1.61474  | 5.36628  | 2.12957  | 1.52647  | 1.39541  | 1.64679  | -0.34313 | 0.65264  | 0.99577  | 0.664523 | 0.095383 | 0.344608 |
| RP6-65G23.1__lincR  | 0        | 0        | 1.10565  | 0        | 1.90331  | 30.5084  | 0.146561 | 0.49149  | 1.34552  | -4.87355 | -0.84321 | 4.030343 | 0.38656  | 0.104787 | 0.398313 |
| RPL12L3__pseudog    | 24.9401  | 26.7583  | 24.1114  | 14.7896  | 8.93851  | 4.35054  | 37.6059  | 28.8739  | 28.2318  | 1.432911 | -0.32116 | -1.75407 | 0.032363 | 0.190802 | 0.002804 |
| RPL12P38__pseudo    | 2.40075  | 6.20927  | 5.39914  | 1.07922  | 2.20371  | 2.33286  | 6.03329  | 2.03287  | 2.57777  | 1.31881  | 0.39634  | -0.92247 | 0.070719 | 0.687268 | 0.415079 |
| RPL13AP3__pseudo    | 0.021025 | 0.024796 | 0.035057 | 0.334418 | 1.17412  | 0        | 0.082333 | 0.091797 | 0.114273 | -4.22127 | -1.83427 | 2.386992 | 0.308391 | 0.005781 | 0.369427 |

|                   |          |          |          |          |          |          |          |          |          |          |          |          |          |          |          |
|-------------------|----------|----------|----------|----------|----------|----------|----------|----------|----------|----------|----------|----------|----------|----------|----------|
| RPL13AP7__pseudo  | 0        | 0        | 0        | 0        | 0        | 0        | 0        | 0        | 0        | #DIV/0!  | #DIV/0!  | #DIV/0!  | #DIV/0!  | #DIV/0!  | #DIV/0!  |
| RPL13P5__pseudog  | 0.621449 | 0.826903 | 1.19072  | 0.768132 | 2.12314  | 7.44964  | 0.479243 | 0        | 2.01743  | -1.97026 | 0.080024 | 2.050285 | 0.304494 | 0.930203 | 0.224445 |
| RPL14P1__pseudog  | 267.625  | 203.273  | 83.3041  | 111.759  | 51.3897  | 38.9066  | 152.247  | 189.334  | 203.495  | 1.455662 | 0.023955 | -1.43171 | 0.084643 | 0.968485 | 0.093767 |
| RPL18AP3__pseudo  | 221.26   | 89.8025  | 132.663  | 84.4707  | 28.9276  | 49.6455  | 56.1673  | 195.43   | 132.686  | 1.444408 | 0.207497 | -1.23691 | 0.053429 | 0.824896 | 0.321299 |
| RPL21P122__pseud  | 1.99124  | 1.28309  | 1.56719  | 2.91282  | 5.4581   | 12.7092  | 0.831756 | 1.96781  | 0.800385 | -2.12235 | 0.427483 | 2.549834 | 0.21441  | 0.537414 | 0.197954 |
| RPL23AP79__pseud  | 7.97017  | 2.52138  | 2.72392  | 8.65139  | 0        | 5.46028  | 2.23006  | 2.63672  | 1.89541  | -0.09466 | 0.966665 | 1.061326 | 0.863215 | 0.357702 | 0.456238 |
| RPL23AP7__pseudo  | 2.22673  | 2.96188  | 2.52307  | 1.58604  | 1.80508  | 3.2776   | 2.45691  | 1.92739  | 1.2771   | 0.209635 | 0.445886 | 0.236251 | 0.604495 | 0.276327 | 0.733864 |
| RPL29P2__pseudog  | 0        | 0.130965 | 0.05533  | 0        | 1.26532  | 0.729783 | 0.269622 | 0        | 0.179543 | -3.42081 | -1.26966 | 2.151146 | 0.208681 | 0.532249 | 0.365132 |
| RPL31P11__pseudo  | 0        | 0        | 0.059779 | 0        | 1.19021  | 1.07144  | 0.097508 | 0        | 0        | -5.24161 | -0.7059  | 4.535708 | 0.186175 | 0.809543 | 0.221223 |
| RPL32P3__pseudog  | 1.46309  | 3.51247  | 3.87381  | 3.75721  | 7.09441  | 6.07479  | 5.76332  | 11.5802  | 2.49233  | -0.93563 | -1.16446 | -0.22883 | 0.026317 | 0.313969 | 0.723777 |
| RPL34-AS1__lincRN | 100.552  | 149.162  | 35.0691  | 26.915   | 31.7008  | 15.749   | 119.651  | 83.327   | 74.2786  | 1.937172 | 0.038642 | -1.89853 | 0.13209  | 0.944974 | 0.033551 |
| RPL37P23__pseudo  | 17.7526  | 19.9534  | 556.202  | 638.855  | 156.835  | 21.6867  | 689.762  | 914.547  | 95.7039  | -0.46076 | -1.51723 | -1.05647 | 0.844702 | 0.472197 | 0.332139 |
| RPL5P1__pseudoge  | 12.2449  | 11.9993  | 9.34111  | 12.3034  | 5.63069  | 10.2211  | 6.71562  | 13.4384  | 14.4199  | 0.254429 | -0.04185 | -0.29628 | 0.512382 | 0.925335 | 0.646361 |
| RPL5P34__pseudog  | 1412.68  | 835.471  | 446.528  | 398.89   | 139.087  | 259.535  | 540.197  | 778.783  | 581.4    | 1.756535 | 0.503825 | -1.25271 | 0.119553 | 0.481624 | 0.12765  |
| RPL7AP30__pseudo  | 45.4303  | 35.1532  | 32.7867  | 56.283   | 19.0955  | 18.2292  | 40.3973  | 24.9982  | 17.7253  | 0.276342 | 0.44776  | 0.171418 | 0.529285 | 0.073473 | 0.642888 |
| RPL7AP31__pseudo  | 298.345  | 433.405  | 434.431  | 166.984  | 123.899  | 5.83618  | 12.2879  | 385.868  | 16.2964  | 1.974622 | 1.492514 | -0.48211 | 0.078491 | 0.14707  | 0.776708 |
| RPL9P9__pseudoge  | 59.6112  | 42.2063  | 21.4439  | 17.1125  | 11.7233  | 8.5115   | 35.8409  | 32.8532  | 29.1735  | 1.722645 | 0.332818 | -1.38983 | 0.079317 | 0.45065  | 0.001325 |
| RPLP0P2__pseudog  | 0.863487 | 0.399283 | 0.354364 | 0.384776 | 2.54211  | 17.6396  | 0.692414 | 0.393047 | 0.265627 | -3.66878 | 0.259318 | 3.928102 | 0.372111 | 0.203388 | 0.366385 |
| RPLP0P6__pseudog  | 319.361  | 107.707  | 179.221  | 97.2447  | 32.885   | 49.1484  | 123.698  | 238.239  | 199.177  | 1.757806 | 0.111712 | -1.64609 | 0.080279 | 0.889509 | 0.137819 |
| RPS11P6__pseudog  | 6.92754  | 12.2609  | 21.1104  | 6.67452  | 17.9124  | 131.998  | 15.4473  | 10.3523  | 7.06034  | -1.95814 | 0.294408 | 2.252544 | 0.395328 | 0.740365 | 0.430694 |
| RPS18P12__pseudo  | 74.3255  | 136.341  | 75.4738  | 12.0541  | 5.99809  | 19.891   | 43.9322  | 114.474  | 119.214  | 2.91481  | 0.04361  | -2.8712  | 0.074184 | 0.914565 | 0.080508 |
| RPS2P46__pseudog  | 69.5987  | 79.3924  | 57.0573  | 51.284   | 29.1758  | 24.5604  | 55.2042  | 93.4072  | 104.639  | 0.972316 | -0.29758 | -1.2699  | 0.067569 | 0.472361 | 0.166942 |
| RPS2P5__pseudoge  | 129.52   | 127.95   | 106.646  | 82.0866  | 50.568   | 31.1429  | 92.5999  | 197.801  | 192.954  | 1.152485 | -0.40868 | -1.56117 | 0.020396 | 0.411652 | 0.157637 |
| RPS3AP47__pseudc  | 71.0651  | 103.133  | 32.502   | 145.689  | 922.98   | 454.902  | 26.7545  | 6.02069  | 7.78011  | -2.88185 | 2.349577 | 5.231422 | 0.178306 | 0.124537 | 0.166349 |
| RPS4XP16__pseudc  | 1.19965  | 2.35604  | 3.79347  | 1.90724  | 2.19639  | 109.907  | 1.21539  | 1.26018  | 1.38912  | -3.95545 | 0.927227 | 4.882672 | 0.419682 | 0.23865  | 0.414022 |
| RPS4XP6__pseudoc  | 144.474  | 521.077  | 9.53042  | 140.723  | 120.948  | 505.513  | 664.096  | 182.356  | 142.48   | -0.18451 | -0.55081 | -0.3663  | 0.916558 | 0.714356 | 0.79993  |
| RPSAP52__pseudoc  | 0.831644 | 1.35233  | 1.07681  | 1.26948  | 24.4269  | 119.48   | 0.923438 | 0        | 0.055292 | -5.47644 | 1.736237 | 7.212681 | 0.320782 | 0.223727 | 0.317029 |
| RRN3P1__pseudoge  | 2.99866  | 20.8865  | 13.2082  | 17.0897  | 26.8237  | 6.25952  | 3.43693  | 25.6157  | 20.4017  | -0.43575 | -0.41494 | 0.020812 | 0.550389 | 0.172084 | 0.978934 |
| RRN3P2__pseudoge  | 2.77224  | 3.6316   | 0        | 2.53289  | 2.30895  | 8.3015   | 1.88907  | 3.08517  | 5.70382  | -1.03732 | -0.73764 | 0.299682 | 0.537309 | 0.574354 | 0.489218 |
| RRN3P3__pseudoge  | 1.6165   | 2.86913  | 1.2199   | 4.48339  | 6.21328  | 2.32605  | 2.34183  | 3.85226  | 2.72254  | -1.1906  | -0.64414 | 0.54646  | 0.0698   | 0.042708 | 0.261973 |
| RUSC1-AS1__antise | 0        | 0        | 0        | 0        | 0        | 0        | 0        | 0        | 0        | #DIV/0!  | #DIV/0!  | #DIV/0!  | #DIV/0!  | #DIV/0!  | #DIV/0!  |
| SAA2-SAA4__proce: | 67.6271  | 0.078028 | 16.1306  | 7.51094  | 1.51654  | 16.036   | 3.29892  | 0.582089 | 5.53116  | 1.741978 | 3.154966 | 1.412988 | 0.435719 | 0.340949 | 0.204294 |
| SAA3P__pseudogen  | 0        | 0        | 0.742626 | 0        | 0.945082 | 2.59326  | 0        | 0        | 0        | -2.25237 | #DIV/0!  | #DIV/0!  | 0.223235 | 0.42265  | 0.25986  |
| SACS-AS1__lincRN/ | 0        | 2.1927   | 0.226141 | 0.05856  | 14.7295  | 14.7858  | 1.55422  | 0.016061 | 0        | -3.61193 | 0.623293 | 4.235228 | 0.184013 | 0.817476 | 0.226888 |
| SATB2-AS1__antise | 0.896148 | 1.66633  | 0        | 1.68299  | 1.90809  | 10.0501  | 0        | 0.560124 | 0.879873 | -2.41236 | 0.831474 | 3.243831 | 0.365683 | 0.612773 | 0.252217 |



|                    |          |          |          |          |          |          |          |          |          |          |          |          |          |          |          |
|--------------------|----------|----------|----------|----------|----------|----------|----------|----------|----------|----------|----------|----------|----------|----------|----------|
| SBF2-AS1__antisen: | 0.173574 | 1.11505  | 3.07488  | 1.40088  | 7.29561  | 15.0513  | 1.50409  | 0.492036 | 1.07652  | -2.44423 | 0.506006 | 2.95024  | 0.173016 | 0.699521 | 0.232029 |
| SCAND2P__pseudo    | 0        | 1.08024  | 0.646985 | 0        | 2.13049  | 0        | 0        | 0        | 0        | -0.30273 | #DIV/0!  | #DIV/0!  | 0.811254 | 0.208039 | 0.42265  |
| SCARNA10__sense_   | 1019.8   | 989.178  | 334.184  | 227.973  | 270.568  | 79.719   | 284.805  | 854.804  | 586.856  | 2.018666 | 0.440636 | -1.57803 | 0.072955 | 0.548586 | 0.145424 |
| SCARNA12__snoRN    | 338.249  | 405.878  | 245.68   | 93.8354  | 95.4867  | 31.506   | 138.143  | 244.492  | 236.077  | 2.164223 | 0.677879 | -1.48634 | 0.01206  | 0.167161 | 0.105924 |
| SCARNA17__antiser  | 23.7241  | 15.6822  | 9.62614  | 5.59261  | 11.7855  | 6.47396  | 8.8143   | 32.7266  | 9.44814  | 1.039622 | -0.05645 | -1.09607 | 0.227179 | 0.950118 | 0.267708 |
| SCARNA2__lincRNA   | 392.755  | 383.072  | 157.141  | 144.913  | 128.032  | 64.8638  | 169.659  | 308.953  | 279.257  | 1.465621 | 0.299879 | -1.16574 | 0.06475  | 0.618387 | 0.13883  |
| SCARNA5__snoRN#    | 166.925  | 671.014  | 132.326  | 48.255   | 185.248  | 24.8617  | 119.569  | 241.344  | 209.807  | 1.90897  | 0.765596 | -1.14337 | 0.1964   | 0.474731 | 0.124583 |
| SCARNA6__snoRN#    | 110.044  | 463.131  | 120.758  | 39.3284  | 113.866  | 34.8233  | 76.6283  | 132.12   | 243.161  | 1.883928 | 0.618763 | -1.26516 | 0.203174 | 0.605828 | 0.282806 |
| SCARNA9__antisen:  | 85.6799  | 192.269  | 123.193  | 0        | 28.9912  | 11.3991  | 171.277  | 62.6067  | 121.34   | 3.312032 | 0.175385 | -3.13665 | 0.03411  | 0.829379 | 0.118837 |
| SCDP1__pseudogen   | 436.149  | 56.7274  | 11.9545  | 1113.88  | 14.1509  | 36.9441  | 27.1531  | 46.8078  | 38.9491  | -1.20643 | 2.160627 | 3.367054 | 0.439118 | 0.448116 | 0.441318 |
| SDC4P__pseudogen   | 0        | 0        | 0        | 0        | 0.449103 | 0        | 0        | 0        | 0        | #NUM!    | #DIV/0!  | #DIV/0!  | 0.42265  | #DIV/0!  | 0.42265  |
| SDCBP2-AS1__antis  | 3.97769  | 5.82332  | 2.93938  | 76.2734  | 6.63664  | 43.9184  | 8.15846  | 13.5505  | 4.17956  | -3.3154  | -1.0229  | 2.292494 | 0.207413 | 0.144453 | 0.263817 |
| SDHAP1__pseudoge   | 9.84968  | 36.463   | 17.8166  | 12.6604  | 44.4169  | 10.7104  | 308.13   | 63.2215  | 2.96914  | -0.08004 | -2.54522 | -2.46518 | 0.808506 | 0.40273  | 0.402445 |
| SDHAP3__pseudoge   | 0        | 1.93815  | 3.18092  | 2.4761   | 67.8347  | 4.28737  | 1.796    | 23.0172  | 1.56599  | -3.86519 | -2.36545 | 1.49974  | 0.391776 | 0.421476 | 0.380044 |
| SEC1P__pseudogen   | 1.75108  | 0.743142 | 1.24889  | 0.991863 | 10.1038  | 25.5209  | 0.824669 | 2.59652  | 0.968018 | -3.29019 | -0.22972 | 3.060464 | 0.270736 | 0.821602 | 0.275322 |
| SEC24B-AS1__antis  | 0        | 3.22758  | 1.64036  | 4.22004  | 7.62861  | 31.5457  | 1.75312  | 0.739631 | 0.788845 | -3.15612 | 0.568914 | 3.725038 | 0.271206 | 0.710206 | 0.267472 |
| SEMA3B__processe   | 0.556814 | 3.52363  | 1.18928  | 2.05705  | 9.19687  | 3.93372  | 2.10198  | 3.83605  | 3.14913  | -1.5271  | -0.7861  | 0.740996 | 0.116108 | 0.123723 | 0.349938 |
| SENP3-EIF4A1__prc  | 100.881  | 48.2921  | 64.8158  | 37.6388  | 19.3073  | 24.392   | 37.4884  | 68.6396  | 46.8024  | 1.395533 | 0.484661 | -0.91087 | 0.048146 | 0.488891 | 0.23716  |
| SEPHS1P6__pseudc   | 26.1745  | 43.8032  | 3.23834  | 29.497   | 20.6853  | 10.7446  | 2.64654  | 8.18637  | 2.44358  | 0.26508  | 2.463286 | 2.198206 | 0.710781 | 0.189433 | 0.105578 |
| SEPT7P9__pseudog   | 0.647223 | 7.01517  | 0.85076  | 1.92305  | 2.31106  | 0        | 3.31257  | 0.880347 | 1.37169  | 1.007635 | 0.613414 | -0.39422 | 0.50068  | 0.746262 | 0.682654 |
| SERBP1P5__pseudc   | 22.8378  | 12.9625  | 23.2379  | 10.9594  | 4.60169  | 6.96999  | 11.5425  | 20.1639  | 17.3298  | 1.389732 | 0.267802 | -1.12193 | 0.033558 | 0.605575 | 0.181857 |
| SERBP1P6__pseudc   | 75.1484  | 46.9346  | 72.234   | 18.1286  | 8.75421  | 35.9088  | 5.16828  | 100.307  | 61.1077  | 1.629768 | 0.222171 | -1.4076  | 0.021989 | 0.819501 | 0.374735 |
| SERPINA13P__pseu   | 0        | 0        | 0.52282  | 0        | 3.30681  | 17.1223  | 0        | 0        | 0        | -5.28817 | #DIV/0!  | #DIV/0!  | 0.320977 | 0.42265  | 0.323645 |
| SERPINB11__polym   | 0.145338 | 0        | 2.00999  | 0        | 8.56661  | 14.1028  | 0.442061 | 0.359224 | 0        | -3.39477 | 1.42752  | 4.822288 | 0.200844 | 0.621111 | 0.226524 |
| SETD5-AS1__antise  | 14.3199  | 18.6349  | 4.9078   | 7.40388  | 4.12762  | 131.998  | 14.4018  | 12.477   | 16.9112  | -1.9225  | -0.20983 | 1.712674 | 0.523765 | 0.746336 | 0.501869 |
| SFTA1P__lincRNA    | 0.355895 | 0.51962  | 0.210565 | 0.351913 | 0.56775  | 3.73755  | 0.186753 | 1.26903  | 0.313727 | -2.10034 | -0.70422 | 1.396117 | 0.415478 | 0.490969 | 0.52349  |
| SH3BP5-AS1__antis  | 4.77867  | 1.02111  | 2.35392  | 1.96615  | 3.22985  | 5.14253  | 0.614517 | 1.0842   | 1.10517  | -0.3425  | 1.540027 | 1.882531 | 0.721842 | 0.289594 | 0.087584 |
| SH3GL1P1__pseudc   | 0.071203 | 0.573163 | 0.238451 | 0.425985 | 0.641879 | 0.553315 | 0.05122  | 0.637189 | 1.38254  | -0.87686 | -1.23011 | -0.35325 | 0.110597 | 0.401452 | 0.714641 |
| SIGLEC16__pseudo   | 0.730781 | 0.089908 | 0.669971 | 0.126394 | 1.96971  | 6.62362  | 0.719246 | 0.915105 | 0.287856 | -2.54833 | -0.36681 | 2.181519 | 0.334608 | 0.726038 | 0.391565 |
| SIX3-AS1__antisens | 0.219532 | 0        | 0.159298 | 0        | 0.211036 | 5.10604  | 0        | 0.116464 | 0.129493 | -3.81101 | 0.623144 | 4.434155 | 0.42473  | 0.693502 | 0.411784 |
| SKINTL__pseudoger  | 0.061275 | 0        | 1.2525   | 0.081236 | 4.39515  | 250.796  | 0        | 0.650202 | 0        | -7.60218 | 1.014758 | 8.616934 | 0.412526 | 0.728777 | 0.413907 |
| SLC22A20__pseudo   | 0.068534 | 0        | 0.900488 | 2.94385  | 2.23363  | 222.802  | 1.21878  | 0        | 0.478444 | -7.87816 | -0.80858 | 7.069583 | 0.409437 | 0.656858 | 0.412417 |
| SLC25A3P1__pseud   | 0        | 0        | 0.923985 | 0        | 363.264  | 2.43873  | 0.034928 | 0        | 0        | -8.62859 | 4.725409 | 13.354   | 0.420247 | 0.444871 | 0.418842 |
| SLC2A1-AS1__lincR  | 0        | 2.02995  | 0.751137 | 2.33524  | 3.43206  | 25.9589  | 1.81678  | 0.540823 | 1.19968  | -3.51195 | -0.35513 | 3.156827 | 0.340887 | 0.812614 | 0.347715 |
| SLC38A3__processe  | 5.055    | 0.071302 | 0.423818 | 0.080383 | 0.543367 | 15.4003  | 0.492102 | 0.033058 | 0.026345 | -1.52965 | 3.331071 | 4.860719 | 0.616982 | 0.369926 | 0.419475 |

|                     |          |          |          |          |          |          |          |          |          |          |          |          |          |          |          |
|---------------------|----------|----------|----------|----------|----------|----------|----------|----------|----------|----------|----------|----------|----------|----------|----------|
| SLC39A12-AS1__an    | 0        | 0        | 0        | 0        | 1.56944  | 1.79288  | 0.542081 | 0        | 0        | #NUM!    | #NUM!    | 2.632877 | 0.1853   | 0.42265  | 0.333674 |
| SLC6A10P__pseudo    | 0.015115 | 0.187131 | 0.180433 | 0.114033 | 1.78101  | 0.406264 | 0.356169 | 0.057897 | 0.186785 | -2.58825 | -0.65087 | 1.937375 | 0.313184 | 0.654685 | 0.44022  |
| SLC7A11-AS1__proc   | 1.86834  | 3.29571  | 10.2185  | 1.39872  | 3.94456  | 7.45041  | 1.51632  | 2.74937  | 3.31264  | 0.265862 | 1.021343 | 0.755481 | 0.48131  | 0.350415 | 0.301133 |
| SLC8A1-AS1__antis   | 15.9568  | 1.57134  | 27.0361  | 51.3473  | 192.484  | 370.709  | 16.1324  | 8.16173  | 3.74131  | -3.78555 | 0.668635 | 4.454184 | 0.166325 | 0.605824 | 0.178439 |
| SLC9A7P1__pseudo    | 0.265021 | 0.062499 | 0.150422 | 0.199859 | 0.198713 | 0.500039 | 0.060698 | 0.164317 | 0.125186 | -0.91086 | 0.44865  | 1.359512 | 0.362254 | 0.678893 | 0.211057 |
| SLC9B1P3__pseudo    | 0        | 0        | 1.07786  | 1.84203  | 2.79874  | 7.69741  | 0.33188  | 0.022517 | 0.025384 | -3.51689 | 1.504929 | 5.021817 | 0.123739 | 0.634863 | 0.167917 |
| SLIT2-IT1__sense_ir | 0.186475 | 0        | 0.061872 | 0.568442 | 0        | 0.058157 | 0        | 0.336171 | 0        | -1.33519 | -0.43684 | 0.898347 | 0.428292 | 0.869777 | 0.747077 |
| SLX1A-SULT1A3__f    | 5.80114  | 3.4399   | 9.75204  | 4.55273  | 4.15639  | 5.85934  | 3.03053  | 0.61145  | 13.9378  | 0.382625 | 0.111557 | -0.27107 | 0.384489 | 0.85838  | 0.805796 |
| SMARCE1P5__pseu     | 56.7244  | 45.6603  | 44.9197  | 24.9317  | 40.6266  | 53.1556  | 8.64322  | 12.2229  | 65.8722  | 0.311312 | 0.764059 | 0.452747 | 0.503193 | 0.437818 | 0.474423 |
| SMCR2__lincRNA      | 0        | 0        | 0.595678 | 0        | 1.28045  | 2.46087  | 0        | 0        | 0        | -2.65094 | #DIV/0!  | #DIV/0!  | 0.197255 | 0.42265  | 0.22134  |
| SMCR5__antisense    | 0        | 0        | 0.020715 | 0.013757 | 0.077501 | 2.40394  | 0.942993 | 0.011313 | 0.01127  | -6.91234 | -5.54265 | 1.369693 | 0.400869 | 0.421577 | 0.656054 |
| SMG1P1__pseudoge    | 0        | 0        | 0        | 0        | 7.05288  | 7.9689   | 25.4546  | 22.3278  | 0        | #NUM!    | #NUM!    | -1.66942 | 0.185017 | 0.185246 | 0.384639 |
| SMG7-AS1__proces    | 0        | 0        | 0        | 0        | 0        | 9.8959   | 1.28727  | 0        | 0        | #NUM!    | #NUM!    | 2.942516 | 0.42265  | 0.42265  | 0.501948 |
| SMIM2-AS1__antise   | 1.23325  | 44.2153  | 3.39666  | 33.7562  | 9.94174  | 33.432   | 60.1904  | 1.96604  | 12.1138  | -0.65907 | -0.60457 | 0.054507 | 0.708321 | 0.799065 | 0.952669 |
| SMPD4P1__pseudog    | 0        | 0        | 0.591102 | 0        | 9.72514  | 76.8572  | 0.625079 | 0        | 0        | -7.19452 | -0.08063 | 7.11389  | 0.354257 | 0.977198 | 0.359419 |
| SNAI3-AS1__antiser  | 1.72504  | 2.02104  | 3.59686  | 2.22228  | 3.09508  | 7.63169  | 0.629723 | 2.58652  | 2.94423  | -0.81842 | 0.253317 | 1.071733 | 0.230246 | 0.510534 | 0.212446 |
| SNAP25-AS1__antis   | 4.16838  | 5.8472   | 6.16719  | 3.49221  | 110.778  | 514.989  | 2.24034  | 5.31854  | 8.69206  | -5.28112 | -0.00606 | 5.275059 | 0.318691 | 0.987779 | 0.315653 |
| SNHG10__antisense   | 286.241  | 235.933  | 126.086  | 190.493  | 47.8648  | 26.8707  | 100.601  | 224.476  | 148.206  | 1.289337 | 0.453869 | -0.83547 | 0.05169  | 0.460647 | 0.483057 |
| SNHG11__processe    | 0        | 0        | 0        | 0        | 1.53468  | 2.93245  | 0        | 0        | 0        | #NUM!    | #DIV/0!  | #DIV/0!  | 0.220759 | #DIV/0!  | 0.220759 |
| SNHG12__antisense   | 0        | 5.42734  | 8.16923  | 7.53591  | 2.98241  | 40.2585  | 7.86334  | 7.95964  | 11.8567  | -1.90093 | -1.02558 | 0.875343 | 0.350554 | 0.101228 | 0.53756  |
| SNHG14__processe    | 53.0219  | 75.2274  | 32.8295  | 19.7042  | 16.1124  | 517.947  | 29.7475  | 21.0963  | 15.8521  | -1.7815  | 1.272097 | 3.0536   | 0.537162 | 0.111346 | 0.440069 |
| SNHG16__processe    | 31.4276  | 22.1528  | 23.9705  | 16.1053  | 8.45396  | 8.0606   | 12.7876  | 22.3869  | 35.0252  | 1.249393 | 0.143679 | -1.10571 | 0.001943 | 0.804169 | 0.289385 |
| SNHG18__lincRNA     | 1.7082   | 8.20015  | 12.4685  | 0        | 3.67023  | 5.8      | 5.3417   | 4.05814  | 2.09093  | 1.240536 | 0.961531 | -0.279   | 0.095737 | 0.46508  | 0.820935 |
| SNHG1__processed    | 7.78828  | 81.2736  | 196.43   | 7.39483  | 58.8194  | 71.2122  | 163.994  | 102.386  | 177.785  | 1.05479  | -0.63765 | -1.69244 | 0.328026 | 0.422838 | 0.088867 |
| SNHG3__sense_intr   | 0        | 0        | 0        | 0        | 1.11953  | 52.1068  | 0        | 0        | 0        | #NUM!    | #DIV/0!  | #DIV/0!  | 0.410381 | #DIV/0!  | 0.410381 |
| SNHG8__lincRNA      | 74.9853  | 109.001  | 0        | 31.9146  | 8.56402  | 9.68564  | 705.517  | 405.413  | 1468.83  | 1.874867 | -3.80957 | -5.68443 | 0.295766 | 0.149165 | 0.117756 |
| SNRK-AS1__antisen   | 0        | 0.434741 | 0        | 0.243486 | 0        | 0        | 0.240044 | 0.100383 | 0.13325  | 0.836317 | -0.12375 | -0.96006 | 0.778396 | 0.94804  | 0.203546 |
| SNX29P2__lincRNA    | 1.25036  | 8.79568  | 3.20836  | 93.9846  | 34.0336  | 102.957  | 10.0766  | 35.8847  | 10.4517  | -4.12319 | -2.08956 | 2.033638 | 0.092508 | 0.152375 | 0.193117 |
| SOCS2-AS1__proce    | 2.20812  | 0.924393 | 1.38645  | 1.26704  | 2.47824  | 15.2292  | 0.811103 | 3.04739  | 2.80022  | -2.07    | -0.55925 | 1.510745 | 0.402218 | 0.575203 | 0.428891 |
| SORCS3-AS1__anti    | 0.020292 | 0        | 0.162415 | 0.098046 | 0.129833 | 0.117568 | 0.120743 | 0.026927 | 0.160872 | -0.91893 | -0.75594 | 0.162998 | 0.404727 | 0.301496 | 0.812982 |
| SOX2-OT__sense_o    | 0.094296 | 7.96388  | 4.22927  | 3.83366  | 102.806  | 694.982  | 4.71758  | 6.15688  | 5.06954  | -6.02766 | -0.37583 | 5.651836 | 0.346394 | 0.58067  | 0.348868 |
| SOX21-AS1__lincRN   | 0.040117 | 0.013893 | 0.180621 | 0.093987 | 0.192529 | 1.95263  | 0.192982 | 0.032268 | 0.043618 | -3.25448 | -0.1965  | 3.057981 | 0.350486 | 0.90409  | 0.407001 |
| SPAG5-AS1__proce    | 0        | 0        | 1.13168  | 14.7955  | 48.803   | 6.68169  | 0.649725 | 0.610525 | 4.30656  | -5.95658 | -2.29838 | 3.658195 | 0.221739 | 0.223509 | 0.256942 |
| SPATA41__lincRNA    | 0.037084 | 0.059031 | 0.784393 | 0.208895 | 0        | 8.03212  | 0.925427 | 0.040572 | 0.239548 | -3.22641 | -0.45328 | 2.773134 | 0.41385  | 0.819951 | 0.48094  |
| SPATA42__antisens   | 0        | 0        | 0        | 0        | 0        | 1.80705  | 0        | 0        | 0.462541 | #NUM!    | #NUM!    | 1.965983 | 0.42265  | 0.42265  | 0.42265  |

|                    |          |          |          |          |          |          |          |          |          |          |          |          |          |          |          |
|--------------------|----------|----------|----------|----------|----------|----------|----------|----------|----------|----------|----------|----------|----------|----------|----------|
| SPATA8-AS1__antis  | 0        | 0        | 12.5093  | 0        | 26.6033  | 8.68026  | 0.154588 | 0.068958 | 0        | -1.496   | 5.806288 | 7.302283 | 0.51079  | 0.433019 | 0.274964 |
| SPON1__processed   | 1.07651  | 0.307892 | 6.20004  | 3.02115  | 100.521  | 85.4834  | 1.23647  | 14.3871  | 14.4541  | -4.63939 | -1.98758 | 2.651817 | 0.180307 | 0.204315 | 0.178124 |
| SPPL2B__processer  | 25.4194  | 10.163   | 12.4103  | 37.5141  | 7.67342  | 35.1493  | 9.01562  | 22.4499  | 20.2461  | -0.74325 | -0.10767 | 0.635573 | 0.278318 | 0.902146 | 0.53304  |
| SPTY2D1-AS1__pro   | 1.58307  | 0        | 0.916568 | 3.3967   | 1.13705  | 19.0677  | 1.21074  | 2.49915  | 0.437839 | -3.23908 | -0.7306  | 2.508482 | 0.333414 | 0.629999 | 0.402798 |
| SRD5A2__processer  | 3.79783  | 0.05724  | 0.903113 | 8.30759  | 6.92308  | 23.0318  | 0.835102 | 0        | 0.013218 | -3.00745 | 2.48773  | 5.495177 | 0.180496 | 0.270411 | 0.141856 |
| SRD5A3-AS1__proc   | 2.93044  | 1.05933  | 10.4832  | 7.02008  | 3.68794  | 25.1359  | 5.91495  | 13.4717  | 21.8838  | -1.30837 | -1.51175 | -0.20338 | 0.200777 | 0.096063 | 0.697853 |
| SRGAP2B__pseudoi   | 9.00083  | 133.983  | 13.9664  | 22.3854  | 170.886  | 373.023  | 3.77738  | 4.10725  | 122.365  | -1.85125 | 0.269028 | 2.120273 | 0.345688 | 0.908918 | 0.165413 |
| SRGAP3-AS2__antis  | 0        | 0        | 0        | 0        | 0.910311 | 5.38454  | 0        | 0.029158 | 0        | #NUM!    | #NUM!    | 7.754137 | 0.334486 | 0.42265  | 0.336988 |
| SRP14-AS1__lincRN  | 80.1815  | 107.439  | 83.4458  | 25.6761  | 19.4334  | 15.9503  | 24.1132  | 92.1968  | 26.0089  | 2.150351 | 0.929518 | -1.22083 | 0.018858 | 0.090185 | 0.361458 |
| SRP9P1__pseudoge   | 108.354  | 64.7071  | 63.1954  | 59.073   | 84.8743  | 12.8051  | 30.9321  | 94.3842  | 68.6993  | 0.591866 | 0.284181 | -0.30769 | 0.373878 | 0.706515 | 0.660112 |
| SRRM2-AS1__antise  | 0        | 0        | 0        | 0        | 1.43398  | 5.35384  | 0        | 39.4732  | 1.10026  | #NUM!    | #NUM!    | -2.57952 | 0.292934 | 0.406787 | 0.490386 |
| SRSF8__pseudogen   | 4.84637  | 2.29514  | 3.1923   | 2.8498   | 1.20082  | 0.957075 | 2.7757   | 4.27601  | 4.08226  | 1.045154 | -0.1076  | -1.15275 | 0.036227 | 0.846039 | 0.193403 |
| SSR4P1__pseudoge   | 0.066169 | 0.046816 | 0.167334 | 0.228619 | 0.042453 | 0.253416 | 0.846552 | 0.24995  | 0.115289 | -0.90384 | -2.112   | -1.20816 | 0.233437 | 0.334478 | 0.404464 |
| SSTR5-AS1__proce   | 0.022223 | 1.17249  | 0.643606 | 0.239745 | 9.45354  | 2.38199  | 0.127727 | 0.20659  | 1.6186   | -2.7156  | -0.08724 | 2.628354 | 0.30174  | 0.951933 | 0.370181 |
| ST13P19__pseudog   | 875.709  | 341.026  | 380.307  | 31.7277  | 32.5208  | 65.9612  | 137.227  | 433.955  | 334.77   | 3.616493 | 0.817896 | -2.7986  | 0.110419 | 0.464929 | 0.094301 |
| ST13P5__pseudoge   | 5.88137  | 3.08628  | 1.5421   | 1.20237  | 31.4272  | 2.55754  | 1.31499  | 2.98474  | 2.79175  | -1.74332 | 0.56757  | 2.310888 | 0.504306 | 0.583235 | 0.429714 |
| ST3GAL6-AS1__ant   | 0.038085 | 0        | 0        | 0.251    | 1.70234  | 131.998  | 0        | 0        | 0        | -11.7802 | #DIV/0!  | #DIV/0!  | 0.414322 | 0.42265  | 0.414156 |
| ST8SIA6-AS1__antis | 9.43156  | 0.019577 | 0.19938  | 5.84413  | 4.63439  | 17.4485  | 1.13334  | 0        | 0.144509 | -1.53298 | 2.916889 | 4.449872 | 0.420624 | 0.417484 | 0.169357 |
| STARD13-AS__proc   | 7.56998  | 899.408  | 5.91497  | 10.5674  | 4.51173  | 2.85368  | 8.21711  | 26.357   | 15.8147  | 5.669772 | 4.17927  | -1.4905  | 0.422615 | 0.429661 | 0.265427 |
| STK4-AS1__lincRNA  | 0.100076 | 0        | 0.268184 | 0.09689  | 0.984853 | 0        | 0.214531 | 0.063777 | 0.127054 | -1.55456 | -0.13848 | 1.416077 | 0.596432 | 0.888767 | 0.583328 |
| STT3A-AS1__antise  | 17.0744  | 5.21053  | 10.6438  | 9.74231  | 33.3774  | 2.74685  | 5.95643  | 11.6581  | 14.0548  | -0.4781  | 0.056261 | 0.534356 | 0.752314 | 0.945318 | 0.669186 |
| STX18-AS1__antise  | 10.6016  | 7.1496   | 6.3571   | 33.6063  | 17.5071  | 95.9374  | 7.67308  | 19.0211  | 10.6953  | -2.60871 | -0.6331  | 1.97561  | 0.237299 | 0.408987 | 0.289516 |
| SUCLG2P2__pseud    | 28.0721  | 27.3096  | 19.8739  | 7.20828  | 7.81267  | 15.9099  | 16.1041  | 26.5118  | 24.3588  | 1.282752 | 0.168183 | -1.11457 | 0.112337 | 0.62665  | 0.069516 |
| SULT1C2P1__pseuc   | 0        | 0.076134 | 1.45485  | 1.53029  | 2.18816  | 899.74   | 0.189812 | 9.90583  | 0.140515 | -9.20485 | -2.74114 | 6.463712 | 0.420311 | 0.493302 | 0.426764 |
| SUZ12P__pseudoge   | 15.7401  | 21.3218  | 11.435   | 99.2138  | 13.9107  | 1161.52  | 21.8819  | 26.3423  | 11.4374  | -4.71606 | -0.29891 | 4.417148 | 0.386093 | 0.187418 | 0.391479 |
| SVILP1__pseudoger  | 0        | 9.89866  | 0.243452 | 0        | 13.0994  | 115.125  | 3.78057  | 4.36318  | 6.55256  | -3.66024 | -0.5351  | 3.125145 | 0.406794 | 0.714366 | 0.398604 |
| SYN2__processed_t  | 0.075007 | 0.132688 | 9.0812   | 0.417048 | 8.18715  | 79.538   | 0.784159 | 0.800219 | 0.428284 | -3.24625 | 2.206402 | 5.452656 | 0.358034 | 0.517553 | 0.374148 |
| SYNJ2BP-COX16__    | 10.0663  | 4.573    | 6.74916  | 13.4873  | 51.1467  | 762.947  | 3.16695  | 8.32687  | 5.38016  | -5.274   | 0.342032 | 5.616028 | 0.38565  | 0.673087 | 0.383193 |
| SYNPR-AS1__antise  | 3.85135  | 20.1563  | 1.49027  | 17.8486  | 6.7813   | 148.732  | 1.22969  | 1.73716  | 3.21898  | -2.76534 | 2.04334  | 4.808676 | 0.425158 | 0.403271 | 0.341372 |
| TAPT1-AS1__antise  | 3.81739  | 6.11888  | 3.51114  | 27.7404  | 9.73689  | 207.45   | 2.03828  | 8.44703  | 9.25958  | -4.18695 | -0.55415 | 3.632802 | 0.349245 | 0.436489 | 0.34948  |
| TAS2R18__pseudog   | 36.6594  | 16.6803  | 3.10695  | 13.5402  | 5.4581   | 27.2194  | 4.09556  | 2.29781  | 9.30441  | 0.288442 | 1.846327 | 1.557885 | 0.832414 | 0.348914 | 0.140337 |
| TBC1D27__pseudog   | 0.121804 | 0.070144 | 0.262413 | 0.071322 | 0.478952 | 3.59481  | 0.249759 | 0.110719 | 0.064892 | -3.18949 | 0.09512  | 3.28461  | 0.365398 | 0.929913 | 0.395654 |
| TBC1D3P1-DHX40P    | 12.7244  | 16.5157  | 8.36047  | 14.592   | 9.44133  | 65.4522  | 1859.19  | 12.8307  | 1732.1   | -1.2509  | -6.58275 | -5.33185 | 0.479561 | 0.184829 | 0.183764 |
| TBC1D3P2__pseudc   | 0        | 0.159824 | 0.460154 | 0        | 0.79781  | 3.09518  | 1.21291  | 0.026231 | 0.611492 | -2.65059 | -1.57773 | 1.07286  | 0.303002 | 0.422151 | 0.589102 |
| TBC1D3P5__pseudc   | 0        | 0        | 0        | 0.025292 | 2.37467  | 23.8522  | 0.083952 | 0.010398 | 0.113948 | #NUM!    | #NUM!    | 6.977647 | 0.367684 | 0.152593 | 0.369694 |

|                    |          |          |          |          |          |          |          |          |          |          |          |          |          |          |          |
|--------------------|----------|----------|----------|----------|----------|----------|----------|----------|----------|----------|----------|----------|----------|----------|----------|
| TBX5-AS1__antisen: | 0.008034 | 0.018945 | 0.072425 | 0.032082 | 0.146332 | 7.26681  | 0.092323 | 0.035165 | 0.017517 | -6.22688 | -0.54474 | 5.682142 | 0.410593 | 0.741613 | 0.418682 |
| TCAM1P__pseudoge   | 0.004438 | 0.026165 | 0.115576 | 0.067921 | 1.78119  | 25.4267  | 1.39935  | 0.007284 | 0.084661 | -7.54374 | -3.35075 | 4.192985 | 0.382654 | 0.443448 | 0.414806 |
| TCL6__processed_tr | 0.366945 | 0        | 2.07545  | 0.046996 | 7.12952  | 12.4692  | 0.308693 | 0.028979 | 0        | -3.00785 | 2.854603 | 5.862449 | 0.212221 | 0.414794 | 0.223255 |
| TEKT4P2__pseudog   | 11.0516  | 0.977766 | 0.543234 | 8.23038  | 2.93014  | 1.04997  | 10.4987  | 7.58745  | 0.184132 | 0.042162 | -0.53922 | -0.58138 | 0.939718 | 0.50477  | 0.333873 |
| TEN1-CDK3__proce   | 1.33495  | 9.7018   | 1.70904  | 3.80873  | 21.2284  | 92.9292  | 1.02204  | 1.65178  | 2.52319  | -3.21028 | 1.294267 | 4.504549 | 0.339531 | 0.461749 | 0.296465 |
| TERC__lincRNA      | 84.6442  | 188.532  | 33.4687  | 38.0275  | 46.7637  | 14.4224  | 56.8221  | 69.9574  | 230.304  | 1.627959 | -0.21969 | -1.84765 | 0.203966 | 0.874192 | 0.316858 |
| TERF1P5__pseudog   | 7.84191  | 1.92037  | 3.16175  | 8.59974  | 3.12676  | 20.9665  | 2.85818  | 6.47519  | 20.5601  | -1.33893 | -1.20977 | 0.129151 | 0.360999 | 0.475025 | 0.757275 |
| TEX21P__pseudoge   | 0.18612  | 0        | 0.944682 | 0        | 5.81925  | 4.94093  | 0.121214 | 0.135175 | 0.201858 | -3.25028 | 1.303149 | 4.553433 | 0.212727 | 0.487601 | 0.196403 |
| TEX26-AS1__antisei | 0.721083 | 0.190585 | 1.76867  | 1.81804  | 29.883   | 40.2585  | 2.85372  | 0.448868 | 3.29824  | -4.7467  | -1.30023 | 3.446467 | 0.177397 | 0.141681 | 0.201546 |
| TEX41__lincRNA     | 4.56245  | 1.83961  | 3.53151  | 18.9641  | 41.2948  | 104.392  | 0.263548 | 0.291792 | 0.1844   | -4.05095 | 3.747222 | 7.798176 | 0.182418 | 0.062821 | 0.166475 |
| TFP1__pseudogene   | 292.601  | 11.4384  | 10.0423  | 5.36395  | 41.4548  | 67.6526  | 8.86152  | 14.2463  | 12.4866  | 1.456153 | 3.141417 | 1.685264 | 0.608664 | 0.433386 | 0.260844 |
| THAP9-AS1__antise  | 29.5577  | 60.6069  | 15.156   | 20.6931  | 3.74005  | 15.4003  | 25.7552  | 2.19803  | 107.694  | 1.402735 | -0.36507 | -1.76781 | 0.34307  | 0.840094 | 0.401612 |
| THRB-AS1__proces   | 0.150694 | 0        | 0        | 0        | 0.438973 | 0        | 0.147004 | 0        | 0.639909 | -1.54251 | -2.38458 | -0.84207 | 0.641389 | 0.425989 | 0.745654 |
| TINCR__lincRNA     | 0.015746 | 0        | 1.22165  | 0        | 0.519467 | 11.4475  | 1.1597   | 0.086155 | 0.055585 | -3.27368 | -0.0728  | 3.200877 | 0.394991 | 0.977395 | 0.462627 |
| TLK2P1__pseudoge   | 10.5856  | 12.4707  | 7.23524  | 5.56299  | 23.3591  | 28.0931  | 7.12732  | 9.4841   | 9.70793  | -0.91243 | 0.202791 | 1.115222 | 0.358705 | 0.558594 | 0.232348 |
| TM4SF1-AS1__antis  | 36.0347  | 62.9837  | 1.11615  | 8.62096  | 14.5637  | 6.94913  | 30.6945  | 16.9331  | 37.4404  | 1.732486 | 0.235251 | -1.49723 | 0.277617 | 0.852302 | 0.159099 |
| TMCC1-AS1__antise  | 0.953179 | 1.31391  | 0.724745 | 0.146153 | 5.2909   | 32.271   | 1.12142  | 0.879658 | 1.98303  | -3.65577 | -0.41323 | 3.242544 | 0.369827 | 0.573012 | 0.364187 |
| TMCO5B__pseudog    | 0        | 0        | 0.229387 | 0.058025 | 18.9253  | 66.378   | 0.827423 | 0        | 0        | -8.53966 | -1.85084 | 6.688814 | 0.285625 | 0.597876 | 0.292953 |
| TMED11P__pseudog   | 1.36769  | 0.048878 | 0.514011 | 7.37629  | 6.44325  | 8.40761  | 1.4829   | 3.58372  | 5.58852  | -3.52522 | -2.46444 | 1.060773 | 0.007144 | 0.185641 | 0.063137 |
| TMEM161B-AS1__a    | 19.4743  | 50.5713  | 16.5999  | 19.909   | 14.5242  | 73.0158  | 4.03531  | 28.1492  | 7.11704  | -0.31046 | 1.140539 | 1.450994 | 0.8206   | 0.051814 | 0.430933 |
| TMEM191A__proces   | 1.39607  | 0.867501 | 1.49395  | 1.19998  | 1.59559  | 2.6508   | 0.749336 | 0.786981 | 0.829689 | -0.53551 | 0.667327 | 1.202841 | 0.293894 | 0.136682 | 0.129442 |
| TMEM191C__lincRN   | 0.494839 | 0.433622 | 0.228065 | 0.145433 | 1.35439  | 0.386796 | 0.391187 | 0.68921  | 0.04412  | -0.70601 | 0.040492 | 0.746497 | 0.577443 | 0.944256 | 0.441329 |
| TMEM198B__pseud    | 0.916612 | 0        | 1.43879  | 2.3628   | 5.53806  | 3.20593  | 0        | 52.2227  | 0.978335 | -2.2374  | -4.49741 | -2.26001 | 0.156541 | 0.437982 | 0.480674 |
| TMEM212-AS1__linc  | 0        | 0        | 0        | 0        | 5.19606  | 16.6174  | 1.42392  | 0        | 0        | #NUM!    | #NUM!    | 3.937279 | 0.276657 | 0.42265  | 0.326124 |
| TMEM254-AS1__anl   | 4.22087  | 2.16571  | 2.27515  | 2.41108  | 210.479  | 7.73613  | 2.05443  | 4.04837  | 4.5466   | -4.67081 | -0.29805 | 4.37276  | 0.412754 | 0.686474 | 0.412803 |
| TMEM44-AS1__antis  | 0.684793 | 1.51361  | 0.769132 | 8.08128  | 4.476    | 19.6984  | 0.846245 | 0.87141  | 1.60158  | -3.44222 | -0.16159 | 3.280631 | 0.176663 | 0.809106 | 0.157092 |
| TMEM72-AS1__antis  | 10.0719  | 2.39495  | 28.0729  | 3.76378  | 108.917  | 32.5139  | 4.28951  | 7.31607  | 1.821    | -1.84058 | 1.594245 | 3.434825 | 0.434251 | 0.427187 | 0.283226 |
| TMPO-AS1__antiser  | 0        | 0        | 0        | 0        | 0        | 22.5728  | 0        | 0        | 0        | #NUM!    | #DIV/0!  | #DIV/0!  | 0.42265  | #DIV/0!  | 0.42265  |
| TMPRSS4-AS1__an    | 5.1518   | 19.4526  | 13.6345  | 8.00415  | 6.15384  | 47.5782  | 21.9182  | 16.3617  | 25.4117  | -0.69108 | -0.73606 | -0.04499 | 0.629008 | 0.290817 | 0.959812 |
| TNK2-AS1__antisen: | 0        | 0        | 0        | 0        | 0        | 2.83563  | 0        | 0        | 0        | #NUM!    | #DIV/0!  | #DIV/0!  | 0.42265  | #DIV/0!  | 0.42265  |
| TNKS2-AS1__antise  | 0.240084 | 0        | 1.2933   | 0        | 0        | 0        | 0.489497 | 0        | 0.388015 | #DIV/0!  | 0.805228 | #NUM!    | 0.326971 | 0.596739 | 0.188909 |
| TNR-IT1__sense_int | 0        | 0        | 0.533659 | 0.144113 | 1.52698  | 22.9847  | 6.06058  | 0        | 0.084372 | -5.52986 | -3.52541 | 2.004453 | 0.381118 | 0.466913 | 0.54909  |
| TOB1-AS1__process  | 25.0822  | 18.1335  | 1.43001  | 7.51975  | 10.0492  | 19.0637  | 6.84604  | 26.9125  | 42.5231  | 0.285391 | -0.77281 | -1.05821 | 0.823203 | 0.601261 | 0.207892 |
| TP73-AS1__antisens | 0.35407  | 0        | 0.313828 | 0.256465 | 0        | 0.555225 | 0.298453 | 0        | 0        | -0.2813  | 1.162124 | 1.443425 | 0.681168 | 0.330759 | 0.46783  |
| TPM3P6__pseudoge   | 3.02855  | 9.6378   | 8.63616  | 6.09365  | 4.07784  | 3.75828  | 5.87662  | 3.38261  | 10.0336  | 0.612852 | 0.142959 | -0.46989 | 0.468341 | 0.834568 | 0.509871 |

|                    |          |          |          |          |          |          |          |          |          |          |          |          |          |          |          |
|--------------------|----------|----------|----------|----------|----------|----------|----------|----------|----------|----------|----------|----------|----------|----------|----------|
| TPSB2__polymorphi  | 0.725044 | 0.177221 | 0.177538 | 0.722707 | 0.82547  | 3.72639  | 0.186958 | 2.43717  | 1.0774   | -2.28828 | -1.77735 | 0.510932 | 0.328677 | 0.392428 | 0.711382 |
| TPT1-AS1__antisens | 1215.52  | 1824.55  | 495.833  | 462.551  | 390.659  | 184.59   | 1384.97  | 913.092  | 659.236  | 1.76855  | 0.257799 | -1.51075 | 0.125469 | 0.645135 | 0.045869 |
| TPTE2P1__pseudog   | 0.562325 | 0.15597  | 0.220947 | 2.70385  | 4.51897  | 3.90196  | 0.75643  | 0.031446 | 1.21375  | -3.56614 | -1.0916  | 2.474532 | 0.035468 | 0.398208 | 0.056356 |
| TPTE2P3__pseudog   | 0.049029 | 0        | 0.809549 | 0        | 2.63787  | 4.10617  | 1.15068  | 0.01856  | 0.043142 | -2.97359 | -0.49782 | 2.475768 | 0.195246 | 0.847804 | 0.357301 |
| TPTE2P5__pseudog   | 5.67611  | 80.8936  | 5.25702  | 139.952  | 15.7036  | 115.807  | 94.565   | 13.9069  | 142.792  | -1.56377 | -1.45222 | 0.11155  | 0.441637 | 0.479732 | 0.779275 |
| TPTE2P6__pseudog   | 26.1368  | 119.028  | 20.8086  | 20.8827  | 91.5996  | 78.1968  | 35.7934  | 30.0756  | 51.1212  | -0.20019 | 0.504564 | 0.704759 | 0.776508 | 0.700642 | 0.382092 |
| TPTEP1__lincRNA    | 0.483768 | 0.329824 | 1.10178  | 0.393251 | 4.59712  | 48.3233  | 1.32306  | 0.398545 | 0.376238 | -4.79881 | -0.13128 | 4.667527 | 0.374134 | 0.905223 | 0.385755 |
| TRAV20__TR_V_gei   | 0        | 0        | 0        | 0        | 0        | 4.80079  | 0        | 0        | 0        | #NUM!    | #DIV/0!  | #DIV/0!  | 0.42265  | #DIV/0!  | 0.42265  |
| TRAV39__TR_V_gei   | 0.589885 | 0        | 0        | 0        | 0.299796 | 2.06227  | 0.562283 | 0        | 0        | -2.00154 | 0.069137 | 2.070681 | 0.527585 | 0.42265  | 0.518592 |
| TRDV1__TR_V_gen    | 1.02047  | 0        | 1.74083  | 0        | 0        | 0        | 0.326533 | 2.59883  | 0.362139 | #DIV/0!  | -0.25164 | #NUM!    | 0.209945 | 0.89949  | 0.282182 |
| TRHDE-AS1__proce   | 0        | 0        | 0.124954 | 0        | 0        | 1.69953  | 0.136771 | 0        | 0        | -3.76567 | -0.13037 | 3.635302 | 0.42265  | 0.963172 | 0.470823 |
| TRIM43B__pseudog   | 0        | 0        | 0.061114 | 0        | 0.210192 | 1.60846  | 0.529434 | 0.036683 | 0.063106 | -4.89523 | -3.364   | 1.531226 | 0.35019  | 0.381961 | 0.581963 |
| TRIM49D2P__pseud   | 0.010497 | 0.012379 | 0.112013 | 0.166959 | 0.320048 | 0.140207 | 0.231394 | 0        | 0.125512 | -2.21719 | -1.40377 | 0.813414 | 0.179237 | 0.421708 | 0.522454 |
| TRIM51BP__pseud    | 0.047293 | 0        | 0.129349 | 0.075275 | 0.492821 | 0        | 0.191457 | 0.08558  | 0.037718 | -1.68531 | -0.8334  | 0.851909 | 0.557094 | 0.582645 | 0.655977 |
| TRIM51GP__pseud    | 0        | 0        | 0        | 0        | 0.29376  | 0.04381  | 0.134926 | 0        | 0        | #NUM!    | #NUM!    | 1.32302  | 0.343803 | 0.42265  | 0.641356 |
| TRIM51HP__pseud    | 0        | 0.055729 | 0.157108 | 0        | 0.149542 | 10.3773  | 0.031703 | 0        | 0        | -5.62818 | 2.747069 | 8.375251 | 0.417375 | 0.383702 | 0.416157 |
| TRIM53BP__pseud    | 0        | 0        | 0.039692 | 0.16877  | 0        | 0.21055  | 0.086349 | 0.009627 | 0.111863 | -3.25649 | -2.38854 | 0.867949 | 0.183519 | 0.1405   | 0.232153 |
| TRIM64__pseudoge   | 0.046904 | 0        | 0.056985 | 0        | 0.036921 | 0        | 0.093496 | 0        | 0        | 1.49253  | 0.152061 | -1.34047 | 0.531489 | 0.918485 | 0.675059 |
| TRPC2__pseudogen   | 0.080151 | 0.145597 | 0.404279 | 0.377695 | 2.30023  | 6.51464  | 0.684882 | 0.022461 | 2.98264  | -3.86698 | -2.55013 | 1.316853 | 0.237801 | 0.333633 | 0.2461   |
| TSGA10IP__polymo   | 0        | 0.083258 | 0.512234 | 0.046841 | 1.69495  | 20.7001  | 0.70299  | 0        | 0.038401 | -5.23597 | -0.31615 | 4.919815 | 0.377201 | 0.901115 | 0.395955 |
| TSPAN10__polymorj  | 0.06375  | 0.022355 | 0.037935 | 0.150855 | 0.11917  | 12.4084  | 0.197786 | 0.062097 | 0.103075 | -6.67543 | -1.549   | 5.126429 | 0.414098 | 0.105652 | 0.422184 |
| TSSC2__pseudogen   | 0        | 0        | 1.57976  | 6.54667  | 0.390467 | 116.861  | 0        | 0.143485 | 0        | -6.29214 | 3.460734 | 9.752874 | 0.388895 | 0.477241 | 0.390044 |
| TTC25__processed_  | 0.115145 | 0.271569 | 1.82493  | 0.057359 | 4.79589  | 14.7858  | 0.747883 | 3.48355  | 0.219374 | -3.15053 | -1.00895 | 2.141586 | 0.267064 | 0.645447 | 0.401099 |
| TTC28-AS1__proces  | 8.56831  | 10.1389  | 8.94001  | 8.90271  | 9.11219  | 238.001  | 16.4439  | 7.18412  | 4.79821  | -3.21103 | -0.04009 | 3.170939 | 0.424401 | 0.952031 | 0.43686  |
| TTC3-AS1__antisens | 0        | 0        | 0        | 0        | 0        | 0        | 0        | 0        | 0        | #DIV/0!  | #DIV/0!  | #DIV/0!  | #DIV/0!  | #DIV/0!  | #DIV/0!  |
| TTLL7-IT1__sense_i | 0.030166 | 0.035571 | 1.08932  | 0.026753 | 0.124697 | 1.08004  | 0.019735 | 0.065997 | 0.087665 | -0.09244 | 2.735818 | 2.828258 | 0.507895 | 0.434466 | 0.385505 |
| TTN-AS1__antisense | 1.8857   | 3.30837  | 5.26755  | 0.224998 | 17.7302  | 224.397  | 4.18512  | 19.0843  | 0.639909 | -4.53393 | -1.19247 | 3.34146  | 0.390364 | 0.532306 | 0.43646  |
| TUBA3FP__pseudog   | 0        | 1.83547  | 4.15265  | 1.99579  | 3.59492  | 1.66453  | 0        | 4.79005  | 3.212    | -0.27692 | -0.41827 | -0.14135 | 0.79917  | 0.625007 | 0.845677 |
| TUBA4B__pseudoge   | 13.2488  | 5.25175  | 17.2857  | 5.39239  | 159.4    | 8.76686  | 6.76205  | 15.193   | 11.2811  | -2.27795 | 0.106652 | 2.384603 | 0.485434 | 0.889323 | 0.43831  |
| TUBB7P__pseudoge   | 0.048097 | 0.074133 | 0.158341 | 0.262715 | 0.025608 | 30.5084  | 0.276966 | 0.170522 | 0.161093 | -6.77827 | -1.11709 | 5.661184 | 0.419505 | 0.237471 | 0.425684 |
| TUSC7__antisense   | 0        | 0.016817 | 0.099936 | 0.023073 | 0.111368 | 5.46353  | 0.068137 | 0.037982 | 0        | -5.58338 | 0.137775 | 5.721153 | 0.410086 | 0.950001 | 0.419729 |
| TYRO3P__pseudoge   | 0.155088 | 0.365929 | 0.619563 | 0.306568 | 0.123158 | 13.683   | 0.378135 | 0.295225 | 0.58767  | -3.62916 | -0.14483 | 3.484322 | 0.426822 | 0.705517 | 0.433448 |
| U73169.1__pseudog  | 0        | 0.271454 | 0        | 0        | 0.226723 | 0        | 0.215105 | 0        | 0.715116 | 0.259777 | -1.77687 | -2.03664 | 0.42265  | 0.521329 | 0.47956  |
| U91319.1__lincRNA  | 0.483108 | 0.667128 | 15.4004  | 0        | 31.1756  | 337.008  | 1.63666  | 0        | 0.53542  | -4.47547 | 2.929738 | 7.405204 | 0.37157  | 0.443773 | 0.37465  |
| UBA6-AS1__antisen  | 14.8393  | 10.9281  | 13.2193  | 46.1505  | 24.3852  | 85.4834  | 7.50239  | 13.0862  | 16.5853  | -2.00067 | 0.068692 | 2.069361 | 0.154306 | 0.874741 | 0.140176 |

|                    |          |          |          |          |          |          |          |          |          |          |          |          |          |          |          |
|--------------------|----------|----------|----------|----------|----------|----------|----------|----------|----------|----------|----------|----------|----------|----------|----------|
| UBAC2-AS1__lincRN  | 0        | 0        | 0.769804 | 0        | 0        | 2.10271  | 0.816469 | 0        | 0        | -1.44969 | -0.08491 | 1.36478  | 0.42265  | 0.975991 | 0.670779 |
| UBE2Q2P1__pseud    | 7.92034  | 1.31793  | 2.11531  | 55.2973  | 15.3279  | 46.083   | 1.45533  | 0        | 6.61471  | -3.36169 | 0.4925   | 3.854186 | 0.080286 | 0.762619 | 0.084288 |
| UBE2V1P2__pseud    | 37.1504  | 27.1859  | 24.5668  | 14.3987  | 4.71632  | 2.29598  | 14.5988  | 23.9752  | 24.4299  | 2.053882 | 0.496793 | -1.55709 | 3.85E-05 | 0.343578 | 0.181547 |
| UBL7-AS1__antisen  | 4.62273  | 2.34443  | 2.9385   | 1.12371  | 1.91257  | 8.92546  | 1.10275  | 3.56509  | 25.0218  | -0.2721  | -1.58363 | -1.31153 | 0.829146 | 0.489971 | 0.367454 |
| UBOX5-AS1__antise  | 2.0736   | 1.72484  | 0.918648 | 9.51653  | 7.06405  | 22.6831  | 1.50465  | 0        | 0.876414 | -3.05723 | 0.98629  | 4.043517 | 0.155334 | 0.257626 | 0.123052 |
| UBQLN4P1__pseud    | 6.92249  | 9.48232  | 3.1168   | 27.5614  | 7.12402  | 4.66287  | 2.69269  | 12.3236  | 11.6364  | -1.01123 | -0.44921 | 0.56202  | 0.450476 | 0.585264 | 0.721788 |
| UBTFL1__pseudoge   | 0.026897 | 0        | 0        | 0.053375 | 0.08583  | 0        | 0.09643  | 0        | 0.058398 | -2.37169 | -2.52514 | -0.15345 | 0.27811  | 0.186579 | 0.919742 |
| UCA1__processed_t  | 0        | 0.151809 | 1.67274  | 11.239   | 1.16702  | 62.5282  | 7.00639  | 7.94781  | 13.4383  | -5.36001 | -3.9599  | 1.400115 | 0.318017 | 0.026552 | 0.459735 |
| UCHL1-AS1__antise  | 2.2221   | 0.268825 | 2.48644  | 0.753383 | 45.4449  | 35.2399  | 0.760129 | 0.682434 | 0.772883 | -4.03225 | 1.167785 | 5.200036 | 0.209154 | 0.303711 | 0.19038  |
| UGDH-AS1__antiser  | 10.5574  | 9.18401  | 21.152   | 60.3243  | 7.22611  | 48.7099  | 16.8884  | 10.7495  | 10.1867  | -1.50742 | 0.112544 | 1.619962 | 0.235555 | 0.861126 | 0.221437 |
| UHRF1__processed   | 3.08168  | 0.368183 | 5.246    | 11.2468  | 5.70965  | 25.1931  | 0.901534 | 2.85197  | 2.13617  | -2.27712 | 0.562141 | 2.839258 | 0.130196 | 0.642979 | 0.176855 |
| ULK4P3__pseudoge   | 0.153554 | 0.052141 | 0.606325 | 0.119999 | 0.667935 | 12.4015  | 0.372992 | 0.094924 | 0.103409 | -4.02172 | 0.507203 | 4.528927 | 0.394977 | 0.747506 | 0.408393 |
| UOX__pseudogene    | 0.225923 | 0.929119 | 0.853094 | 0.331469 | 3.47869  | 3.73755  | 0.214823 | 0.174191 | 0        | -1.91018 | 2.367963 | 4.278145 | 0.169533 | 0.179434 | 0.17177  |
| UPK1A-AS1__antise  | 0        | 0        | 1.0255   | 0        | 0        | 55.5718  | 0        | 0        | 0.417422 | -5.75995 | 1.296749 | 7.056703 | 0.42265  | 0.42265  | 0.42265  |
| URAHF__pseudoger   | 0        | 0.076675 | 0.783356 | 1.38281  | 0.172476 | 0.431865 | 0.190436 | 0.247771 | 0        | -1.20824 | 0.972777 | 2.181017 | 0.544934 | 0.704487 | 0.296065 |
| USP12-AS2__antise  | 0        | 0.089034 | 1.417    | 0        | 3.13369  | 6.44881  | 1.40626  | 0        | 0        | -2.66965 | 0.098891 | 2.768539 | 0.207149 | 0.971174 | 0.353923 |
| USP17L9P__pseud    | 0.438797 | 0.028181 | 0.787343 | 0.358342 | 1.16403  | 0.629741 | 0.421548 | 0.153496 | 0.260071 | -0.77885 | 0.586859 | 1.365707 | 0.549093 | 0.553645 | 0.294571 |
| USP2-AS1__antisen  | 22.4638  | 7.30742  | 3.05278  | 8.30319  | 10.9572  | 572.914  | 1.43442  | 9.91949  | 13.4924  | -4.1732  | 0.401719 | 4.574919 | 0.433485 | 0.805023 | 0.414535 |
| USP3-AS1__antisen  | 0.647527 | 114.599  | 0.552779 | 15.1843  | 1032.98  | 1274.13  | 114.668  | 5.49917  | 22.4267  | -4.32585 | -0.30029 | 4.025567 | 0.188706 | 0.902899 | 0.224356 |
| USP32P1__pseudog   | 0.16785  | 0.065583 | 0.148636 | 0.178878 | 3.19392  | 2.61593  | 0.192787 | 0.079765 | 0.046602 | -3.97034 | 0.259579 | 4.229922 | 0.187547 | 0.657289 | 0.189223 |
| USP32P2__pseudog   | 0.150265 | 0.061633 | 0.16789  | 0.162072 | 0.217749 | 6.88032  | 0.708271 | 0.126183 | 0.126203 | -4.25673 | -1.33883 | 2.917904 | 0.408367 | 0.404613 | 0.463314 |
| USP32P3__pseudog   | 0.386276 | 0.388069 | 0.429431 | 0.158346 | 1.04627  | 6.30648  | 0.259103 | 0.503271 | 0.489517 | -2.64146 | -0.05654 | 2.584914 | 0.384687 | 0.847207 | 0.381537 |
| VAC14-AS1__antise  | 0.102645 | 0.181602 | 0.256612 | 0.271698 | 5.19665  | 8.68433  | 0.094115 | 0.251865 | 0.306518 | -4.70968 | -0.27072 | 4.438957 | 0.198774 | 0.255751 | 0.198927 |
| VENTXP7__pseudog   | 0        | 0        | 0        | 0        | 0.691149 | 3.26942  | 0        | 0        | 0.148674 | #NUM!    | #NUM!    | 4.735483 | 0.315722 | 0.42265  | 0.311468 |
| VIM-AS1__antisense | 209.344  | 91.5161  | 57.494   | 39.0243  | 61.3546  | 46.562   | 12.4519  | 77.3665  | 68.4955  | 1.28615  | 1.178598 | -0.10755 | 0.295736 | 0.415834 | 0.827178 |
| VN1R5__pseudogen   | 0.060039 | 0        | 0.150034 | 0        | 0.4465   | 4.67566  | 0.146663 | 0        | 0        | -4.60779 | 0.518389 | 5.126175 | 0.37643  | 0.788681 | 0.388706 |
| VPS9D1-AS1__antis  | 0        | 0        | 0        | 13.1904  | 4.88822  | 1.54517  | 0.821311 | 0        | 2.45018  | #NUM!    | #NUM!    | 2.584583 | 0.1994   | 0.26909  | 0.291786 |
| WASH2P__pseudog    | 2.28524  | 12.8347  | 5.12237  | 5.46586  | 6.12484  | 3.78573  | 3.11682  | 8.02011  | 6.50512  | 0.396653 | 0.198356 | -0.1983  | 0.627652 | 0.704347 | 0.678029 |
| WASH3P__pseudog    | 5.96976  | 6.26119  | 12.1143  | 7.60561  | 14.373   | 4.84739  | 10.9914  | 10.6148  | 21.8422  | -0.13999 | -0.83566 | -0.69567 | 0.869948 | 0.063851 | 0.458767 |
| WASH5P__pseudog    | 4.50844  | 9.138    | 8.64723  | 7.74982  | 3.87402  | 2.95171  | 2.72418  | 5.4217   | 14.3141  | 0.613084 | -0.01072 | -0.62381 | 0.469873 | 0.986298 | 0.636422 |
| WASH7P__pseudog    | 4.65676  | 6.2324   | 8.18734  | 0        | 2.95534  | 6.4683   | 2.08797  | 6.26119  | 6.69128  | 1.01744  | 0.34295  | -0.67449 | 0.063045 | 0.21616  | 0.171974 |
| WASIR2__antisense  | 0.020498 | 0        | 0.389266 | 0.135417 | 1.83136  | 7.2075   | 0.220281 | 0.078162 | 0.355721 | -4.48473 | -0.67486 | 3.809871 | 0.283343 | 0.350156 | 0.304529 |
| WBP11P1__pseudog   | 0.088899 | 0.174708 | 0.217638 | 0.157689 | 8.58577  | 2.31946  | 0.184174 | 0.140469 | 0.107647 | -4.52282 | 0.154771 | 4.677589 | 0.295345 | 0.810933 | 0.296967 |
| WDFY3-AS2__proce   | 0        | 1.85241  | 0.589406 | 0        | 3.32581  | 4.42436  | 0        | 1.5596   | 0        | -1.66627 | 0.646778 | 2.313052 | 0.253995 | 0.22607  | 0.249743 |
| WDR11-AS1__antise  | 9.35096  | 7.58687  | 5.93995  | 4.17392  | 44.1862  | 28.0931  | 4.49605  | 9.71065  | 14.8625  | -1.74063 | -0.34554 | 1.395086 | 0.282222 | 0.655541 | 0.259186 |

|                     |          |          |          |          |          |          |          |          |          |          |          |          |          |          |          |
|---------------------|----------|----------|----------|----------|----------|----------|----------|----------|----------|----------|----------|----------|----------|----------|----------|
| WDR7-UT1__sense_    | 0        | 0        | 0.304976 | 0.160143 | 0.706766 | 0.860258 | 0.118813 | 1.0442   | 0.131854 | -2.50164 | -2.08604 | 0.415604 | 0.100618 | 0.463418 | 0.689501 |
| WDR82P1__pseudo     | 106.522  | 60.469   | 61.0372  | 31.6796  | 2.93594  | 15.0513  | 8.36583  | 86.1177  | 70.2988  | 2.198857 | 0.468651 | -1.73021 | 0.019318 | 0.641566 | 0.351861 |
| WHAMMP3__pseudo     | 1.68634  | 0.708764 | 0.569664 | 2.36846  | 6.66986  | 3.32181  | 0.369743 | 0.593731 | 0.581822 | -2.0597  | 0.940036 | 2.999739 | 0.178253 | 0.379926 | 0.102697 |
| WI2-3658N16.1__ps   | 20.5458  | 3.16945  | 2.45256  | 15.3032  | 1.76272  | 1.93964  | 4.27167  | 14.7121  | 16.5368  | 0.461372 | -0.44086 | -0.90223 | 0.241572 | 0.778898 | 0.574629 |
| WI2-85898F10.1__lir | 0        | 0.049825 | 0.379472 | 0.277953 | 2.15353  | 8.70681  | 0.041157 | 0        | 0.137057 | -4.69741 | 1.268367 | 5.965775 | 0.280517 | 0.422185 | 0.284134 |
| WT1-AS__antisense   | 0.085003 | 0.045871 | 0.673264 | 0        | 0.755529 | 21.9843  | 0.80232  | 0.047757 | 0        | -4.82163 | -0.08015 | 4.741483 | 0.406061 | 0.97304  | 0.425812 |
| WTAPP1__pseudog     | 2.27352  | 4.03197  | 9.63924  | 21.2065  | 8.20314  | 24.3389  | 4.80002  | 23.9856  | 68.1102  | -1.75315 | -2.60335 | -0.85021 | 0.102907 | 0.244146 | 0.495088 |
| WWC2-AS1__antise    | 0        | 0        | 0        | 0        | 2.76048  | 0        | 0        | 0        | 0        | #NUM!    | #DIV/0!  | #DIV/0!  | 0.42265  | #DIV/0!  | 0.42265  |
| WWC2-AS2__lincRN    | 0        | 0.032361 | 0        | 0.036462 | 0        | 1.81988  | 0        | 0.149988 | 0.089643 | -5.84205 | -2.88848 | 2.953577 | 0.421556 | 0.190845 | 0.462665 |
| WWP1P1__pseudog     | 26.4735  | 56.4589  | 15.1414  | 16.1484  | 4.65698  | 5.58632  | 20.0292  | 29.2643  | 25.154   | 1.893783 | 0.397644 | -1.49614 | 0.229004 | 0.54052  | 0.124146 |
| WWTR1-AS1__antis    | 0.069285 | 0.122562 | 0.190687 | 3.70665  | 3.57752  | 1.86602  | 0.288507 | 0.094603 | 0.325876 | -4.58014 | -0.89017 | 3.689973 | 0.042924 | 0.27248  | 0.047631 |
| XPOTP1__pseudoge    | 18.167   | 37.7715  | 54.868   | 15.7594  | 76.5948  | 259.972  | 14.007   | 26.3849  | 11.8575  | -1.66887 | 1.084556 | 2.753425 | 0.332049 | 0.243438 | 0.315625 |
| XXbac-B135H6.15__   | 1.34968  | 1.70955  | 1.09553  | 3.0207   | 1.83251  | 5.62113  | 0.935038 | 1.29919  | 0        | -1.33402 | 0.894989 | 2.229011 | 0.243939 | 0.106635 | 0.209632 |
| XXbac-B33L19.3__a   | 0.001512 | 0.08104  | 0.971782 | 0.02828  | 0.642154 | 38.4431  | 0.649216 | 0.043506 | 0.333567 | -5.21326 | 0.038895 | 5.252159 | 0.413658 | 0.982209 | 0.423135 |
| XXbac-B444P24.10_   | 0.017075 | 0.023009 | 0.18739  | 0.094265 | 0.100751 | 2.22092  | 0.161359 | 0.016026 | 0.023953 | -3.40881 | 0.17608  | 3.584889 | 0.379562 | 0.930822 | 0.418719 |
| XXbac-B444P24.8__   | 0.593674 | 0.0316   | 0.616371 | 0        | 0.535967 | 3.31773  | 0.459862 | 0.029294 | 0.029181 | -1.63399 | 1.260291 | 2.894281 | 0.463595 | 0.306595 | 0.42671  |
| XXyac-YX155B6.2__   | 0.050658 | 0.033177 | 0.336903 | 0.405652 | 1.11009  | 0.087434 | 0.379966 | 0        | 0        | -1.92994 | 0.14705  | 2.076991 | 0.412005 | 0.950158 | 0.365949 |
| XXyac-YX155B6.6__   | 0.271663 | 0.083395 | 0.123086 | 0.167158 | 0.201329 | 0.173161 | 0.094702 | 0.034371 | 0.061143 | -0.17991 | 1.329806 | 1.509716 | 0.77825  | 0.1422   | 0.050595 |
| XXyac-YX60D10.1__   | 0        | 0        | 0        | 0        | 20.5323  | 2.22552  | 0.208281 | 0        | 0        | #NUM!    | #NUM!    | 6.771687 | 0.363796 | 0.42265  | 0.369651 |
| YBX1P1__pseudoge    | 55.4473  | 33.5978  | 40.2474  | 33.3409  | 8.57322  | 11.0852  | 22.0559  | 65.9668  | 60.843   | 1.286593 | -0.20337 | -1.48997 | 0.006416 | 0.777817 | 0.279254 |
| Z83844.1__antisense | 2.46857  | 2.04527  | 3.10399  | 2.83198  | 2.06926  | 7.60443  | 1.39793  | 3.13904  | 2.22648  | -0.71513 | 0.171621 | 0.886751 | 0.374994 | 0.720407 | 0.415063 |
| Z83851.1__lincRNA   | 0.935007 | 0.472689 | 0.630144 | 0.912499 | 0.095679 | 39.0984  | 0.600909 | 0.524648 | 0.521049 | -4.29873 | 0.307545 | 4.606272 | 0.428673 | 0.36422  | 0.424461 |
| Z97634.3__pseudog   | 2.87833  | 5.1415   | 4.20141  | 2.03225  | 8.30495  | 2.7495   | 1.0187   | 6.79568  | 3.89676  | -0.09871 | 0.061509 | 0.16022  | 0.860507 | 0.882548 | 0.630569 |
| Z98256.1__pseudog   | 0        | 0        | 0        | 0        | 0        | 0        | 0        | 0        | 0        | #DIV/0!  | #DIV/0!  | #DIV/0!  | #DIV/0!  | #DIV/0!  | #DIV/0!  |
| Z99756.1__antisense | 0        | 0        | 5.59234  | 0.102938 | 4.65698  | 1.62005  | 1.29453  | 0.067765 | 0.118121 | -0.1901  | 1.917449 | 2.107546 | 0.925719 | 0.577998 | 0.431244 |
| ZBED3-AS1__antise   | 3.04952  | 0.655836 | 6.66398  | 1.45273  | 46.8079  | 60.2235  | 3.07321  | 0.980112 | 0.962138 | -3.38709 | 1.04787  | 4.434958 | 0.198991 | 0.458763 | 0.202769 |
| ZBED5-AS1__antise   | 13.8802  | 10.2322  | 9.34296  | 8.22291  | 10.0554  | 6.47267  | 7.62234  | 11.2012  | 10.5804  | 0.434752 | 0.186228 | -0.24852 | 0.208117 | 0.637475 | 0.376219 |
| ZBTB20-AS1__antis   | 13.1576  | 22.627   | 22.4435  | 25.6584  | 47.8129  | 70.3771  | 4.97374  | 48.2526  | 0        | -1.30476 | 0.129575 | 1.434337 | 0.110469 | 0.917572 | 0.286749 |
| ZC3H11B__pseudog    | 0.917378 | 0.678664 | 0.750443 | 0.468525 | 0.257058 | 0.182129 | 0.379572 | 0.644254 | 0.681901 | 1.370195 | 0.460114 | -0.91008 | 0.00871  | 0.319017 | 0.278344 |
| ZDHHC20P4__pseu     | 7.24227  | 57.7998  | 5.96666  | 3.41702  | 4.79395  | 16.9304  | 6.98388  | 10.3222  | 5.20102  | 1.497933 | 1.657616 | 0.159683 | 0.511977 | 0.410282 | 0.88691  |
| ZDHHC8P1__pseud     | 0.108327 | 0.048163 | 0.255567 | 0.673053 | 2.51069  | 10.4779  | 0.080098 | 0.089293 | 0.118594 | -5.05114 | 0.516853 | 5.567996 | 0.273531 | 0.508601 | 0.27534  |
| ZEB1-AS1__process   | 1.06066  | 0.544365 | 0.852699 | 0.446162 | 19.4976  | 51.4972  | 0        | 0.313433 | 0.426177 | -4.86136 | 1.732486 | 6.593843 | 0.263522 | 0.149485 | 0.251804 |
| ZEB2-AS1__antisen   | 0        | 0        | 0        | 0        | 0        | 0        | 0        | 0        | 0        | #DIV/0!  | #DIV/0!  | #DIV/0!  | #DIV/0!  | #DIV/0!  | #DIV/0!  |
| ZFAS1__antisense    | 0.619491 | 31.4122  | 0        | 65.7372  | 33.45    | 317.01   | 47.6355  | 15.9646  | 25.6558  | -3.6997  | -1.47845 | 2.221248 | 0.314667 | 0.407315 | 0.354534 |
| ZMIZ1-AS1__antiser  | 0        | 1.22396  | 1.36202  | 5.21834  | 35.3643  | 370.709  | 1.17898  | 0        | 0        | -7.31331 | 1.133172 | 8.446479 | 0.363901 | 0.627008 | 0.364206 |
