# Supplementary material for: RETRACTED ARTICLE: MALAT1 regulates the transcriptional and translational levels of proto-oncogene RUNX2 in colorectal cancer metastasis
Source: PubMed Central journal article supplement (PMC6522477; doi:10.1038/s41419-019-1598-x), 2019-05-16
Supplement: 41419_2019_1598_MOESM3_ESM.pdf [file 41419_2019_1598_MOESM3_ESM.pdf]

# PCR-Sequencing Results:

## WT (744bp) :

AAAGTCCGCCATTTTGCCACTTCTCAACCGTCCCTGCAAGGCTGGGGCTCAGTTGCGTAATGGAAAGTAAAGCCCTGAACTATCACACTTTAATCTTCCCTCAAAA  
GGTGGTAAACTATACCTACTGTCCCTCAAGAGAACACAAGAAGTGCTTTAAGAGGTATTTTAAAAGTTCCGGGGGTTTTGTGAGGTGTTTGATGACCCGTTTAAAA  
TATGATTTCCATGTTTCTTTTGTCTAAAGTTTGCAGCTCAAATCTTTCCACACGCTAGTAATTTAAGTATTTCTGCATGTGTAGTTTGCATTCAAGTTCATAAGC  
TGTTAAGAAAAATCTAGAAAAGTAAAAGTAAACCTATTTTAAACCGAAGAAGTACTTTTTGCCTCCCTCACAAAGGCGGCGGAAGGTGATCGAATTCCGGTGATG  
CGAGTTGTTCTCCGTCTATAAAATACGCCTCGCCGAGCTGTGCGGTAGGCATTGAGGCAGCCAGCGCAGGGGCTTCTGCTGAGGGGGCAGGCGGAGCTTGAGGAAA  
CCGCAGATAAGTTTTTTTTCTCTTTGAAAGATAGAGATTAATACAAGTACTTAAAAAATATAGTCAATAGGTTACTAAGATATTGCTTAGCGTTAAGTTTTTAAACGT  
AATTTTAATAGCTTAAGATTTTAAAGAGAAAAATATGAAGACTTAGAAGAGTAGCATGAGGAAGGAAAAGATAAAAAGGTTTCTAAAACATGACGGAGGTTGAGATGAA  
GC

## M1 :

AAAGTCCGCCATTTTGCCACTTCTCAACCGTCCCTGCAAGGCTGGGGCTCAGTTGCGTAATGGAAAGTAAAGCCCTGAACTATCACACTTTAATCTTCCCTCAAAA  
GGTGGTAAACTATACCTACTGTCCCTCAAGAGAACACAAGAAGTGCTTTAAGAGGTATTTTAAAAGTTCCGGGGGTTTTGTGAGGTGTTTGATGACCCGTTTAAAA  
TATGATTTCCATGTTTCTTTTGTCTAAAGTTTGCAGCTCAAATCTTTCCACACGCTAGTAATTTAAGTATTTCTGCATGTGTAGTTTGCATTCAAGTTCATAAGC  
TGTTAAGAAAAATCTAGAAAAGTAAAAGTAAACCTATTTTAAACCGAAGAAGTACTTTTTGCCTCC-----  
GCCTCGCCCGAGCTGTGCGATAGGCATTGAGGCAGCCAGGCAGGGGCTTCTGCTGAGGGGGCAGGCGGAGCTTGAGGAAACCGCAGATAAGTTTTTTTTCTCTTTG  
AAAGATAGAGATTAATACAAGTACTTAAAAAATATAGTCAATAGGTTACTAAGATATTGCTTAGCGTTAAGTTTTTAAACGTAATTTTAAATAGCTTAAGATTTTAAAG  
AGAAAATATGAAGACTTAGAAGAGTAGCATGAGGAAGGAAAAGATAAAAAGGTTTCTAAAACATGACGGAGGTTGAGATGAAGC -64bp × 1

## M4 :

AAAGTCCGCCATTTTGCCACTTCTCAACCGTCCCTGCAAGGCTGGGGCTCAGTTGCGTAATGGAAAGTAAAGCCCTGAACTATCACACTTTAATCTTCCCTCAAAA  
GGTGGTAAACTATACCTACTGTCCCTCAAGAGAACACAAGAAGTGCTTTAAGAGGTATTTTAAAAGTTCCGGGGGTTTTGTGAGGTGTTTGATGACCCGTTTAAAA  
TATGATTTCCATGTTTCTTTTGTCTAAAGTTTGCAGCTCAAATCTTTCCACACGCTAGTAATTTAAGTATTTCTGCATGTGTAGTTTGCATTCAAGTTCATAAGC  
TGTTAAGAAGAATCTAGAAAAGTAAAAGTAAACCTA-----  
GGGCAGGCGGAGCTTGAGGAAAAGCAGATAAGTTTTCTTTCTTTTGAAGATAGAGATTAATACAAGTACTTAAAAAATATAGTCAATAGGTTACTAAGATATTG  
CTTAGCGTTAAGTTTTTAAACGTAATTTTAAATAGCTTAAGATTTTAAAGAGAAAATATGAAGACTTAGAAGAGTAGCATGAGGAAGGAAAAGATAAAAAGGTTTCTAAA  
ACATGACGGAGGTTGAGATGAAGC -153bp × 1

## M9 :

AAAGTCCGCCATTTTGCCACTTCTCAACCGTCCCTGCAAGGCTGGGGCTCAGTTGCGTAATGGAAAGTAAAGCCCTGAACTATCACACTTTAATCTTCCCTCAAAA  
GGTGGTAAACTATACCTACTGTCCCTCAAGAGAACACAAGAAGTGCTTTAAGAGGTATTTTAAAAGTTCCGGGGGTTTTGTGAGGTGTTTGATGACCCGTTTAAAA  
TATGATTTCCATGTTTCTTTTGTCTAAAGTTTGCAGCTCAAATCTTTCCACACGCTAGTAATTTAAGTATTTCTGCATGTGTAGTTTGCATTCAAGTTCATAAGC  
TGTTAAGAAAAATCTAGAAAAGTAAAAGTAAACCTATTTTAAACCGAAGAAGTACTTTCTGCCTCCCTCACAAAGGCGGCGGAAGGTGATCGAATTCCGGTGATG  
CGAGT-----AGGAAACCGAAGATAAGTTTTTTTTCTCTTTGAAAGATAGAGATTAATAC  
AACTACTTAAAAAATATAGTCAATAGGTTACTAAGATATTGCTTAGCGTTAAGTTTTTAAACGTAATTTTAAATAGCTTAAGATTTTAAAGAGAAAATATGAAGACTTA  
GAAGAGTAGCATGAGGAAGGAAAAGATAAAAAGGTTTCTAAAACATGACGGAGGTTGAGATGAAGC -95bp × 1

## M16 :

AAAGTCCGCCATTTTGCCACTTCTCAACCGTCCCTGCAAGGCTGGGGCTCAGTTGCGTAATGGAAAGTAAAGCCCTGAACTATCACACTTTAATCTTCCCTCAAAA  
GGTGGTAAACTATACCTACTGTCCCTCAAGAGAACACAAGAAGTGCTTTAAGAGGTATTTTAAAAGTTCCGGGGGTTTTGTGAGGTGTTTGATGACCCGTTTAAAA  
TATGATTTCCATGTTTCTTTTGTCTAAAGTTTGCAGCTCAAATCTTTCCACACGCTAGTAATTTAAGTATTTCTGCATGTGTAGTTTGCATTCAAGTTCATAAGC  
TGTTAAGAAAAATCTAGAAAAGTAAAAGTAAACCTATTTTAAACCGAAGAAGTACTTTTTGCCTCCCTCAGAAAGGCGGCGGAAGGTGATCGAAATCCGGTGATG  
CGACTTGTCTCCGTCTATA-----TGCTGAGGGGGCAGGAGGAGCTTGAGGAAACCGCAGATAAGTTTTTTTTCTCTTTG  
AAAGATAGAGATTAATACAAGTACTTAAAAAATATAGTCAATAGGTTACTAAGATATTGCTTAGCGTTAAGTTTTTAAACGTAATTTTAAATAGCTTAAGATTTTAAAG  
AGAAAATATGAAGACTTAGAAGAGTAGCATGAGGAAGGAAAAGATAAAAAGGTTTCTAAAACATGACGGAGGTTGAGATGAAGC -56bp × 1
