# Supplementary figures and images for: RETRACTED ARTICLE: MALAT1 regulates the transcriptional and translational levels of proto-oncogene RUNX2 in colorectal cancer metastasis
Source: PubMed Central journal article supplement (PMC6522477; doi:10.1038/s41419-019-1598-x), 2019-05-16

# Supplementary materials for review

**a**

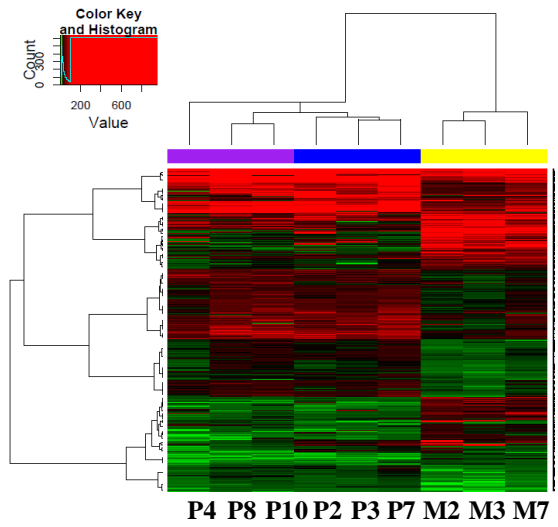

**b**

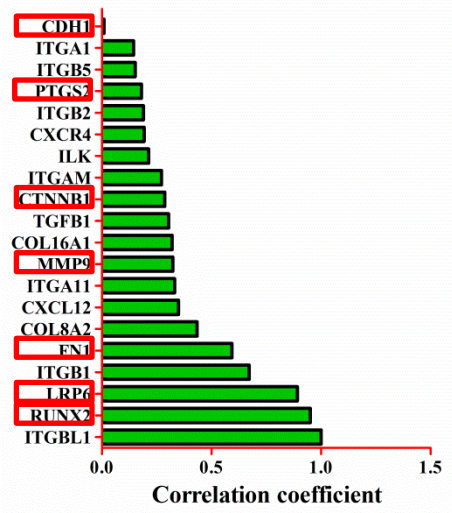

Supplement: 41419_2019_1598_MOESM5_ESM.pdf [file 41419_2019_1598_MOESM5_ESM.pdf]
